# Supplementary material
Source: Research Square preprint supplement (doi:10.21203/rs.3.rs-9074426/v1)
Supplement: Supplementary file 1 [file 1fb9f256244ebd1d6ac3e657.xlsx]

## Sheet: Pre-clinical Stage
ID	logFC	AveExpr	P.Value	adj.P.Val
hsa-miR-144-3p	-2.0994	1.16415	0	0
hsa-miR-30e-5p	-0.851013	7.50798	1.17377e-61	7.94644e-59
hsa-miR-142-3p	-1.22603	4.88268	7.21269e-61	3.25533e-58
hsa-miR-362-3p	-1.25754	-0.125661	7.66246e-57	2.59374e-54
hsa-miR-548aa	-0.78494	1.91662	3.50574e-54	9.49353e-52
hsa-miR-548t-3p	-0.783443	1.89605	7.79072e-54	1.75811e-51
hsa-miR-1180-3p	0.389269	7.19636	1.45904e-53	2.82221e-51
hsa-miR-19a-3p	-1.20019	2.35204	2.32787e-52	3.93992e-50
hsa-miR-98-3p	-1.23253	-0.863625	3.1779e-52	4.78098e-50
hsa-miR-142-5p	-0.839535	9.8938	1.14549e-50	1.55099e-48
hsa-miR-215-5p	-0.721485	1.80113	2.36173e-50	2.90708e-48
hsa-miR-3127-5p	0.510734	0.405681	1.66353e-46	1.87702e-44
hsa-miR-183-5p	-0.924537	8.12605	1.89608e-46	1.97484e-44
hsa-miR-29b-3p	-0.880318	3.89231	5.20877e-46	5.03762e-44
hsa-miR-140-5p	-0.946962	0.298238	1.87254e-45	1.69028e-43
hsa-miR-29c-3p	-0.900728	2.54152	2.13211e-45	1.80429e-43
hsa-miR-101-3p	-1.29456	5.87373	2.83175e-45	2.25541e-43
hsa-miR-301a-3p	-1.42861	-2.01819	6.58102e-45	4.95039e-43
hsa-miR-548bc	-1.37177	-2.87995	1.15384e-44	8.22264e-43
hsa-miR-342-5p	0.355957	4.67947	6.27241e-44	4.06474e-42
hsa-let-7a-3p	-0.883173	3.87113	6.30425e-44	4.06474e-42
hsa-miR-202-5p	-1.25845	-0.847273	1.55436e-43	9.56637e-42
hsa-miR-6511b-3p	0.481699	5.63994	4.14413e-43	2.43963e-41
hsa-miR-320b	0.460616	6.95752	2.72622e-42	1.53804e-40
hsa-miR-18a-5p	-1.00742	2.90141	5.76075e-42	3.12002e-40
hsa-miR-144-5p	-1.4355	6.42086	7.18957e-42	3.74411e-40
hsa-miR-26a-2-3p	-0.928744	-0.0681558	2.14917e-41	1.07777e-39
hsa-miR-320c	0.505458	4.94231	7.55408e-41	3.57587e-39
hsa-miR-34a-5p	1.06759	-1.37299	7.65881e-41	3.57587e-39
hsa-miR-548e-3p	-0.729754	0.808321	1.23332e-40	5.56638e-39
hsa-miR-545-5p	-1.21959	-2.40618	1.70034e-40	7.42666e-39
hsa-miR-320a-3p	0.45535	12.5805	2.78371e-40	1.17786e-38
hsa-miR-190a-5p	-1.19433	0.826915	4.64668e-40	1.90655e-38
hsa-miR-192-5p	-0.523209	8.79404	7.22818e-40	2.87852e-38
hsa-miR-6881-3p	0.417254	3.55797	8.83316e-40	3.41717e-38
hsa-miR-4433a-5p	0.820238	2.13848	1.74991e-38	6.58161e-37
hsa-miR-486-3p	-1.17518	0.609105	2.41037e-38	8.82066e-37
hsa-miR-143-3p	-0.730218	3.45066	2.60226e-38	9.27225e-37
hsa-miR-6511a-3p	0.455687	5.96246	3.0354e-38	1.05383e-36
hsa-miR-21-5p	-0.99154	7.32673	4.00307e-38	1.35504e-36
hsa-miR-19b-3p	-0.732562	7.23016	5.26095e-38	1.7374e-36
hsa-miR-424-5p	-1.14247	-0.220736	5.50467e-38	1.7746e-36
hsa-miR-320e	0.541171	3.23885	1.89624e-37	5.97095e-36
hsa-miR-450b-5p	-1.27662	-1.93368	5.93007e-37	1.82484e-35
hsa-miR-423-5p	0.347955	12.7025	1.61327e-36	4.85415e-35
hsa-miR-624-3p	-1.53467	-3.22429	2.09263e-36	6.15961e-35
hsa-let-7f-1-3p	-0.626829	2.21684	3.33599e-36	9.6105e-35
hsa-miR-30b-5p	-0.505099	9.0043	7.76666e-36	2.19085e-34
hsa-miR-3140-5p	-0.797121	-1.65521	1.8198e-35	5.02859e-34
hsa-miR-27a-3p	-0.663856	3.58984	3.58957e-35	9.72054e-34
hsa-miR-6729-3p	0.49892	1.52077	6.48365e-35	1.72135e-33
hsa-miR-1976	0.363578	7.46756	3.95855e-34	1.03075e-32
hsa-miR-2110	0.365731	6.27812	5.95591e-34	1.505e-32
hsa-miR-374a-3p	-1.49623	-2.78543	6.0022e-34	1.505e-32
hsa-miR-106b-5p	-0.67465	8.20481	1.45188e-33	3.57427e-32
hsa-miR-106a-3p	-1.13363	-2.74317	1.83284e-33	4.43154e-32
hsa-miR-3179	0.402193	0.966174	2.31942e-32	5.50965e-31
hsa-miR-18b-5p	-0.996821	-1.22211	2.89779e-32	6.76485e-31
hsa-miR-320d	0.427521	3.56514	7.89435e-32	1.81169e-30
hsa-miR-450a-5p	-0.841635	0.432884	1.19649e-31	2.70008e-30
hsa-miR-579-3p	-1.09707	-2.57217	1.5488e-31	3.43782e-30
hsa-miR-374c-5p	-0.943553	0.637801	1.60248e-31	3.4996e-30
hsa-miR-451a	-0.499939	17.2822	2.3507e-31	5.05213e-30
hsa-miR-1229-3p	0.405997	3.68063	3.85846e-31	8.16304e-30
hsa-miR-15a-5p	-0.957807	5.93876	1.1876e-30	2.47386e-29
hsa-miR-1306-5p	0.405066	7.46111	3.07586e-30	6.31018e-29
hsa-miR-3605-3p	0.318216	6.42385	3.83479e-30	7.74971e-29
hsa-miR-374a-5p	-1.14005	1.34581	1.32182e-29	2.63198e-28
hsa-miR-6511b-5p	0.404404	0.121934	3.41514e-29	6.70159e-28
hsa-miR-10399-5p	-0.758802	-0.602409	4.51921e-29	8.74145e-28
hsa-miR-210-5p	0.393434	3.01969	1.13207e-28	2.1589e-27
hsa-miR-6802-3p	0.271584	3.16335	1.34521e-28	2.52974e-27
hsa-miR-182-5p	-0.571037	12.0085	1.40443e-28	2.57435e-27
hsa-miR-205-5p	1.35443	-1.38505	1.40696e-28	2.57435e-27
hsa-miR-3138	0.538505	-0.448873	1.66964e-28	3.01425e-27
hsa-miR-26b-3p	-0.395658	4.96474	3.30554e-28	5.88529e-27
hsa-miR-451b	-0.569534	-0.405214	3.34688e-28	5.88529e-27
hsa-miR-6793-3p	0.316622	3.51817	1.681e-27	2.91805e-26
hsa-miR-126-5p	-1.2243	3.34666	4.16305e-27	7.13515e-26
hsa-miR-101-5p	-0.979315	-2.11666	5.95709e-27	1.00824e-25
hsa-miR-499a-5p	-1.2028	-3.31233	7.59038e-27	1.26881e-25
hsa-miR-548d-3p	-0.587049	-0.41519	1.40787e-26	2.3247e-25
hsa-miR-454-5p	-0.374731	5.64918	1.72551e-26	2.81486e-25
hsa-miR-1323	1.62764	-4.05656	1.75226e-26	2.82448e-25
hsa-miR-7-5p	-0.600274	5.41634	2.10964e-26	3.36053e-25
hsa-miR-548c-3p	-0.847851	-2.7052	7.48251e-26	1.17806e-24
hsa-miR-4667-5p	0.545064	-1.38392	9.78042e-26	1.52215e-24
hsa-miR-660-5p	-0.545744	4.33531	1.31592e-25	2.02472e-24
hsa-miR-3173-5p	0.314967	6.46493	1.34418e-25	2.04497e-24
hsa-miR-570-3p	-0.895373	-2.40392	1.38337e-25	2.08121e-24
hsa-miR-148a-3p	-0.583357	6.90018	2.76297e-25	4.11106e-24
hsa-miR-4433b-5p	0.548236	6.31044	3.44966e-25	5.077e-24
hsa-miR-6803-3p	0.400409	7.09309	4.41979e-25	6.43483e-24
hsa-miR-1238-3p	0.402057	0.166895	1.05703e-24	1.52257e-23
hsa-miR-1827	-1.00974	-3.65462	2.02402e-24	2.88477e-23
hsa-miR-301a-5p	-0.674331	-1.85904	5.39739e-24	7.61257e-23
hsa-miR-5193	0.340925	0.657025	6.17396e-24	8.61808e-23
hsa-miR-6859-5p	0.325687	1.12858	7.28404e-24	1.00639e-22
hsa-miR-20b-3p	-0.625213	-1.19634	9.20554e-24	1.25902e-22
hsa-miR-150-3p	0.296977	1.62585	1.31503e-23	1.78055e-22
hsa-miR-939-5p	0.387502	1.60226	1.73287e-23	2.32307e-22
hsa-miR-7110-3p	0.495132	-0.242958	2.6664e-23	3.53952e-22
hsa-miR-548k	-0.819833	-1.17218	2.85701e-23	3.75572e-22
hsa-miR-130a-5p	-0.542557	-0.273034	3.00007e-23	3.90586e-22
hsa-miR-582-5p	-0.881404	-2.388	3.43598e-23	4.43078e-22
hsa-miR-6812-3p	0.305697	1.80171	3.99635e-23	5.10477e-22
hsa-miR-3143	-0.619748	-0.216469	6.37382e-23	8.02736e-22
hsa-miR-3691-5p	0.3332	0.547827	6.40291e-23	8.02736e-22
hsa-miR-186-5p	-0.307024	9.79117	7.92918e-23	9.84964e-22
hsa-miR-548b-5p	-0.825781	-2.27541	8.88635e-23	1.09383e-21
hsa-miR-643	-0.758927	-1.61463	1.39788e-22	1.70516e-21
hsa-miR-4731-5p	0.414745	-0.319783	1.64412e-22	1.98762e-21
hsa-miR-106a-5p	-0.503164	5.30617	1.83724e-22	2.20143e-21
hsa-miR-548d-5p	-0.912796	-0.0270945	2.13423e-22	2.53487e-21
hsa-miR-548ay-5p	-0.903784	0.0371806	2.37551e-22	2.7969e-21
hsa-miR-361-3p	0.222859	7.99713	2.49315e-22	2.9101e-21
hsa-miR-24-3p	-0.289933	6.4919	3.89189e-22	4.50395e-21
hsa-miR-6780a-5p	0.451062	0.296232	4.45878e-22	5.11626e-21
hsa-miR-6855-5p	0.43023	0.0610102	6.16319e-22	7.01258e-21
hsa-miR-5695	-0.453226	1.72633	7.1085e-22	8.02076e-21
hsa-miR-20a-5p	-0.699934	5.86625	7.25409e-22	8.11739e-21
hsa-miR-135a-5p	-0.696121	-1.60261	9.49776e-22	1.0541e-20
hsa-miR-6749-3p	0.291881	4.73034	1.11888e-21	1.23167e-20
hsa-miR-148b-5p	-0.516086	-0.185045	1.22505e-21	1.33768e-20
hsa-miR-96-5p	-0.800338	3.39963	2.08208e-21	2.25531e-20
hsa-miR-6754-3p	0.370132	0.272103	4.32369e-21	4.64226e-20
hsa-miR-652-5p	-0.747594	-2.10462	4.36234e-21	4.64226e-20
hsa-miR-6885-3p	0.249092	2.92485	4.38855e-21	4.64226e-20
hsa-miR-624-5p	-0.788592	-0.72294	4.88161e-21	5.1238e-20
hsa-miR-500b-5p	-0.231127	5.24287	5.94403e-21	6.19094e-20
hsa-miR-126-3p	-0.775893	5.1027	8.28381e-21	8.56204e-20
hsa-miR-4646-5p	0.506147	-0.733936	1.04119e-20	1.068e-19
hsa-miR-548ab	-0.893734	-1.49063	1.20199e-20	1.22368e-19
hsa-miR-17-5p	-0.523785	6.86104	1.35264e-20	1.36678e-19
hsa-miR-548ae-5p	-0.905158	-0.574617	2.28437e-20	2.29114e-19
hsa-miR-10527-5p	0.250086	3.08714	2.39339e-20	2.38283e-19
hsa-miR-33a-3p	-0.94902	-3.33618	2.96969e-20	2.93501e-19
hsa-miR-374b-3p	-0.901902	-3.03617	2.9983e-20	2.94181e-19
hsa-miR-548al	-0.696528	-2.40039	3.48715e-20	3.39684e-19
hsa-miR-26b-5p	-0.631085	8.68246	4.64633e-20	4.49367e-19
hsa-miR-3127-3p	0.313875	1.63804	4.98888e-20	4.79074e-19
hsa-miR-6743-3p	0.360295	1.7035	5.24526e-20	5.00147e-19
hsa-miR-20a-3p	-0.828022	-2.82012	6.36145e-20	6.02336e-19
hsa-miR-3128	-0.499628	-0.690868	7.21187e-20	6.78116e-19
hsa-miR-16-5p	-0.575372	9.97691	9.08337e-20	8.48198e-19
hsa-miR-500a-5p	-0.221498	5.34391	9.7438e-20	9.03637e-19
hsa-miR-548ad-5p	-0.853363	-0.335855	1.5226e-19	1.40245e-18
hsa-miR-598-3p	-0.606437	-0.334177	1.73288e-19	1.58535e-18
hsa-miR-548ap-3p	-1.102	-3.7083	1.82213e-19	1.65581e-18
hsa-miR-23a-5p	0.297781	0.827908	7.12805e-19	6.43426e-18
hsa-miR-17-3p	-0.342514	3.9461	7.65207e-19	6.86153e-18
hsa-miR-542-3p	-1.03255	-3.51749	1.08536e-18	9.66829e-18
hsa-miR-590-5p	-1.08107	-3.65144	1.14822e-18	1.01614e-17
hsa-miR-6741-3p	0.259315	3.16243	1.16053e-18	1.02036e-17
hsa-miR-374b-5p	-0.67441	5.40625	1.34008e-18	1.17062e-17
hsa-miR-454-3p	-0.556967	4.48117	1.39656e-18	1.21214e-17
hsa-let-7f-2-3p	-0.749469	-2.39941	1.73105e-18	1.49289e-17
hsa-miR-335-3p	-0.382652	3.26091	1.96164e-18	1.68105e-17
hsa-miR-4796-5p	-0.845658	-3.20076	3.11188e-18	2.64999e-17
hsa-miR-221-5p	-0.50405	-0.23049	3.15239e-18	2.66771e-17
hsa-miR-4504	-0.697749	-2.50321	3.73193e-18	3.13853e-17
hsa-miR-185-3p	0.247824	4.51298	4.94558e-18	4.13353e-17
hsa-miR-5581-3p	-0.251371	2.00518	5.17017e-18	4.29473e-17
hsa-miR-3202	0.382756	-1.06725	6.05916e-18	5.0025e-17
hsa-miR-651-5p	-0.973225	-3.16108	6.13104e-18	5.03117e-17
hsa-miR-27b-3p	-0.482962	3.99717	6.98607e-18	5.69827e-17
hsa-miR-6882-3p	0.368179	0.809668	8.46763e-18	6.86537e-17
hsa-miR-550b-3p	-0.348702	1.3647	1.09916e-17	8.85874e-17
hsa-miR-6734-3p	0.262535	4.05696	1.2978e-17	1.03977e-16
hsa-miR-324-3p	0.185655	7.21234	1.74382e-17	1.3889e-16
hsa-miR-877-5p	0.319035	2.06313	1.89094e-17	1.49727e-16
hsa-miR-6755-3p	-0.531151	-1.86441	2.3636e-17	1.86065e-16
hsa-miR-485-3p	0.503557	4.53807	3.77354e-17	2.9534e-16
hsa-miR-195-5p	-0.543134	-0.862069	4.07037e-17	3.1674e-16
hsa-miR-532-3p	0.17937	8.41872	4.56279e-17	3.5303e-16
hsa-miR-4646-3p	0.254477	4.64702	5.70028e-17	4.36414e-16
hsa-miR-548az-5p	-0.701821	-1.01298	5.70497e-17	4.36414e-16
hsa-miR-664a-5p	0.25351	2.36303	7.03282e-17	5.34968e-16
hsa-miR-574-5p	0.446989	3.51391	9.79722e-17	7.41086e-16
hsa-miR-505-5p	0.218329	3.25402	1.02027e-16	7.66284e-16
hsa-miR-877-3p	0.265843	2.22346	1.02435e-16	7.66284e-16
hsa-miR-6833-3p	0.215752	4.24418	1.15368e-16	8.56407e-16
hsa-let-7f-5p	-0.437328	10.7931	1.15748e-16	8.56407e-16
hsa-miR-7976	-0.279527	4.12226	1.17026e-16	8.61161e-16
hsa-miR-4685-3p	0.274514	7.23841	1.46533e-16	1.07246e-15
hsa-miR-6748-3p	0.307869	0.19489	1.63207e-16	1.18808e-15
hsa-miR-98-5p	-0.454104	4.88718	1.76699e-16	1.27941e-15
hsa-miR-10401-3p	0.257672	4.31646	1.79128e-16	1.2901e-15
hsa-miR-103a-1-5p	-0.44629	-0.776537	1.8918e-16	1.35529e-15
hsa-miR-125a-5p	0.250626	7.76939	2.05673e-16	1.46569e-15
hsa-miR-532-5p	-0.270749	7.73273	2.27487e-16	1.61266e-15
hsa-miR-193a-5p	0.279461	4.45524	2.36776e-16	1.66976e-15
hsa-miR-23a-3p	-0.22592	10.2684	3.51091e-16	2.46309e-15
hsa-miR-130a-3p	-0.356969	3.90132	3.59014e-16	2.50569e-15
hsa-miR-15b-3p	-0.327066	7.61367	3.79663e-16	2.63622e-15
hsa-miR-6883-3p	0.290129	1.37033	4.8016e-16	3.31703e-15
hsa-miR-556-3p	-0.843632	-3.13318	4.88452e-16	3.35718e-15
hsa-miR-10b-5p	-0.426747	1.28242	6.89123e-16	4.71248e-15
hsa-miR-369-3p	-0.896041	-2.81165	8.36634e-16	5.69247e-15
hsa-miR-194-5p	-0.375608	5.45533	9.78362e-16	6.62351e-15
hsa-miR-30d-3p	-0.551729	-1.78436	1.06379e-15	7.166e-15
hsa-miR-6786-3p	0.220873	2.34696	1.11694e-15	7.48682e-15
hsa-miR-376c-3p	-0.63244	-1.97992	1.24056e-15	8.2745e-15
hsa-miR-4668-3p	-0.81216	-3.40337	1.37148e-15	9.10284e-15
hsa-miR-148b-3p	-0.315476	7.03787	1.40421e-15	9.27463e-15
hsa-miR-4728-3p	0.30939	0.428383	1.54556e-15	1.01587e-14
hsa-miR-4429	0.388365	-0.748176	1.76732e-15	1.15601e-14
hsa-miR-636	0.200413	5.09078	1.9536e-15	1.27172e-14
hsa-miR-22-5p	-0.258058	5.01122	2.10578e-15	1.36422e-14
hsa-miR-671-3p	0.234891	2.80124	2.2521e-15	1.45207e-14
hsa-miR-6798-3p	0.286447	1.55071	2.58468e-15	1.65861e-14
hsa-miR-15a-3p	-0.958279	-3.70052	2.76909e-15	1.76856e-14
hsa-miR-32-3p	-0.749345	-2.26694	2.8682e-15	1.82326e-14
hsa-miR-20b-5p	-0.430602	5.07394	3.2717e-15	2.07004e-14
hsa-miR-4677-5p	-0.530501	-2.0405	5.24126e-15	3.30078e-14
hsa-miR-548g-5p	-0.901618	-3.50163	5.62291e-15	3.52473e-14
hsa-miR-548aj-5p	-0.900331	-3.5016	6.26114e-15	3.90672e-14
hsa-miR-548x-5p	-0.900691	-3.5048	6.63203e-15	4.11916e-14
hsa-miR-197-5p	0.463269	-1.34281	7.54548e-15	4.66511e-14
hsa-miR-345-5p	-0.248482	4.42348	1.02664e-14	6.31851e-14
hsa-miR-6734-5p	0.390711	1.51449	1.04627e-14	6.41021e-14
hsa-miR-7855-5p	0.298028	0.361464	1.10282e-14	6.72622e-14
hsa-miR-6721-5p	0.285483	1.57544	1.33409e-14	8.10023e-14
hsa-miR-139-3p	0.389536	-0.600823	1.34464e-14	8.10332e-14
hsa-miR-1179	-0.458858	-0.958316	1.34656e-14	8.10332e-14
hsa-miR-548ar-5p	-0.893765	-3.52335	1.38659e-14	8.30728e-14
hsa-miR-548au-5p	-0.688453	-0.739753	1.45887e-14	8.7018e-14
hsa-miR-550a-5p	0.174265	5.42109	1.90003e-14	1.12835e-13
hsa-miR-3064-3p	-0.450151	-1.15961	1.95345e-14	1.15501e-13
hsa-miR-4738-3p	0.241026	0.552083	2.00798e-14	1.18209e-13
hsa-miR-6767-5p	0.277332	-0.0269979	2.39235e-14	1.40227e-13
hsa-miR-6514-5p	0.231501	0.295119	3.28907e-14	1.91957e-13
hsa-miR-576-5p	-0.29333	8.62801	3.50824e-14	2.03869e-13
hsa-miR-7706	0.226639	4.13283	4.22452e-14	2.44444e-13
hsa-miR-5582-3p	-0.537631	-1.55271	4.28753e-14	2.47035e-13
hsa-miR-3912-3p	-1.26256	-4.11195	4.61561e-14	2.64811e-13
hsa-miR-6750-5p	0.303716	-0.293953	6.38075e-14	3.64537e-13
hsa-miR-199b-5p	-0.448843	0.376866	7.40384e-14	4.2121e-13
hsa-miR-335-5p	-0.408727	2.5741	7.71505e-14	4.37079e-13
hsa-miR-1275	0.277282	1.56933	7.86235e-14	4.43567e-13
hsa-miR-4446-3p	0.383103	-0.519596	7.95256e-14	4.46796e-13
hsa-miR-146b-5p	-0.32115	4.58356	8.31625e-14	4.65298e-13
hsa-miR-107	-0.335496	8.95475	9.24223e-14	5.14978e-13
hsa-miR-340-5p	-0.445236	2.79008	1.0439e-13	5.79278e-13
hsa-miR-483-3p	0.553248	1.26182	1.19276e-13	6.59181e-13
hsa-miR-1249-3p	0.315928	5.18348	1.29338e-13	7.11885e-13
hsa-miR-664b-5p	0.352265	-0.948537	1.29915e-13	7.12167e-13
hsa-miR-181b-2-3p	-0.661375	-2.99385	1.31314e-13	7.16933e-13
hsa-miR-7113-3p	0.314289	-0.301478	1.36816e-13	7.43973e-13
hsa-miR-4775	-0.767044	-3.29559	1.4359e-13	7.77685e-13
hsa-miR-483-5p	0.703223	-2.94797	1.55998e-13	8.41521e-13
hsa-miR-744-3p	-0.304364	0.517317	1.62064e-13	8.70774e-13
hsa-miR-6842-5p	0.387926	-1.58848	1.63385e-13	8.74402e-13
hsa-miR-23b-3p	-0.219087	8.37365	1.97584e-13	1.05326e-12
hsa-miR-375-3p	0.401712	-0.30131	2.74969e-13	1.46003e-12
hsa-miR-432-5p	0.512028	0.143195	2.83184e-13	1.49778e-12
hsa-miR-6515-5p	0.459168	-2.33753	2.93038e-13	1.54387e-12
hsa-miR-548f-5p	-0.853429	-3.56189	3.11594e-13	1.63527e-12
hsa-miR-199b-3p	-0.634546	1.06535	3.89098e-13	2.03412e-12
hsa-miR-491-3p	-0.516005	-2.28545	4.15682e-13	2.16474e-12
hsa-miR-199a-3p	-0.632645	1.07048	4.28694e-13	2.22395e-12
hsa-miR-103a-2-5p	-0.294521	2.58945	4.3977e-13	2.2727e-12
hsa-miR-4637	-0.57616	-2.35291	6.42085e-13	3.30564e-12
hsa-miR-5094	-0.329622	-0.0886374	7.5942e-13	3.89491e-12
hsa-miR-6505-3p	-0.282665	0.263819	7.70745e-13	3.93807e-12
hsa-miR-136-3p	-0.853953	-3.67943	9.93684e-13	5.05808e-12
hsa-miR-548h-5p	-0.772712	-3.45024	1.31888e-12	6.68823e-12
hsa-miR-4659a-3p	-0.295364	4.97111	1.43283e-12	7.23899e-12
hsa-miR-484	0.137891	12.9432	1.45203e-12	7.30873e-12
hsa-miR-3688-5p	-0.94233	-4.07078	1.52975e-12	7.67142e-12
hsa-miR-548av-3p	-0.334383	-0.178244	1.61923e-12	8.09018e-12
hsa-miR-193a-3p	-0.527242	-2.27574	1.80416e-12	8.981e-12
hsa-miR-3187-3p	0.227114	1.98152	1.83757e-12	9.1138e-12
hsa-miR-4440	0.378878	-0.114046	1.88353e-12	9.30768e-12
hsa-miR-627-5p	-0.456989	-1.74519	1.95704e-12	9.63576e-12
hsa-miR-1301-3p	0.15752	4.9159	2.03761e-12	9.99609e-12
hsa-let-7d-3p	0.277716	8.78546	2.07783e-12	1.01566e-11
hsa-miR-487b-5p	0.62315	-2.93181	2.16795e-12	1.0559e-11
hsa-miR-92b-5p	0.284094	1.96177	2.684e-12	1.30256e-11
hsa-miR-656-3p	-0.673217	-2.95772	3.281e-12	1.5866e-11
hsa-miR-30e-3p	-0.337339	5.75029	3.46256e-12	1.66844e-11
hsa-miR-6511a-5p	0.41481	-1.97419	3.59143e-12	1.72439e-11
hsa-miR-1273h-5p	0.337861	-1.23901	4.72691e-12	2.26157e-11
hsa-miR-6791-3p	0.22096	0.572184	4.84908e-12	2.31185e-11
hsa-miR-200c-3p	0.225221	3.06759	5.25568e-12	2.49691e-11
hsa-miR-582-3p	-0.604682	-3.0172	5.27527e-12	2.49745e-11
hsa-miR-6873-5p	0.486494	-2.45872	6.53433e-12	3.08275e-11
hsa-miR-4797-3p	-0.389401	-1.5947	6.62129e-12	3.11293e-11
hsa-miR-363-3p	-0.33332	8.59661	6.73723e-12	3.15647e-11
hsa-miR-3944-3p	0.386009	-1.84731	6.92167e-12	3.2317e-11
hsa-miR-7111-3p	0.335184	-1.02739	7.21211e-12	3.35574e-11
hsa-miR-29a-5p	-0.58456	-3.10567	7.30112e-12	3.38552e-11
hsa-miR-21-3p	-0.413132	-1.6372	7.76916e-12	3.59025e-11
hsa-miR-328-3p	0.182486	8.46517	1.14481e-11	5.27235e-11
hsa-miR-331-3p	-0.192812	6.25112	1.18151e-11	5.42294e-11
hsa-miR-548e-5p	-0.496684	-2.6001	1.22789e-11	5.61675e-11
hsa-miR-145-3p	-0.374936	-0.150304	1.25845e-11	5.7372e-11
hsa-miR-5010-5p	0.338405	1.92493	1.27955e-11	5.8138e-11
hsa-miR-548ac	-0.38873	-1.17815	1.2932e-11	5.85616e-11
hsa-miR-581	-0.370663	-0.600182	1.3537e-11	6.1097e-11
hsa-miR-147b-5p	-0.775615	-3.70203	1.63699e-11	7.36373e-11
hsa-miR-607	-0.750634	-3.53422	1.69132e-11	7.58294e-11
hsa-miR-664b-3p	-0.16975	3.0129	1.84647e-11	8.25123e-11
hsa-miR-6787-3p	0.355602	-1.52836	2.09886e-11	9.34819e-11
hsa-miR-26a-5p	-0.313184	12.0024	2.5402e-11	1.12768e-10
hsa-miR-7848-3p	0.365468	-1.51379	2.81724e-11	1.24658e-10
hsa-miR-3688-3p	-0.24871	2.05184	2.84352e-11	1.25411e-10
hsa-miR-3180-5p	0.358231	-1.01496	2.94771e-11	1.29584e-10
hsa-miR-4510	-0.490552	-3.04115	2.9893e-11	1.30987e-10
hsa-miR-188-5p	-0.287395	-0.0430127	3.17347e-11	1.38609e-10
hsa-miR-548ay-3p	-0.271028	1.44579	3.24655e-11	1.41345e-10
hsa-miR-1908-5p	0.272211	3.16537	3.29615e-11	1.43044e-10
hsa-miR-3074-3p	-0.427384	-2.01489	4.1795e-11	1.808e-10
hsa-miR-3684	-0.745619	-3.62013	4.27454e-11	1.84322e-10
hsa-miR-3605-5p	0.277019	0.18628	4.35012e-11	1.86986e-10
hsa-miR-6887-3p	0.454689	-2.05273	4.6523e-11	1.99342e-10
hsa-miR-3173-3p	0.452273	-2.38519	5.11793e-11	2.18602e-10
hsa-miR-642a-3p	0.372328	-1.64734	5.431e-11	2.31245e-10
hsa-miR-4667-3p	0.349713	-1.5176	5.51527e-11	2.34096e-10
hsa-miR-5584-5p	0.393737	-1.63917	5.57646e-11	2.35954e-10
hsa-miR-19b-1-5p	-0.572862	-3.00774	5.59684e-11	2.36079e-10
hsa-let-7b-5p	0.331304	12.0479	5.82601e-11	2.44982e-10
hsa-miR-146a-3p	-0.729348	-2.76045	5.85197e-11	2.45312e-10
hsa-miR-550a-3p	-0.213701	6.96759	7.19998e-11	3.00888e-10
hsa-miR-22-3p	0.218567	9.46497	7.80374e-11	3.25116e-10
hsa-miR-616-3p	0.250264	-0.17318	9.32429e-11	3.87273e-10
hsa-miR-4662a-5p	-0.526752	-2.09136	9.7758e-11	4.04784e-10
hsa-miR-937-3p	0.215071	2.14631	9.96294e-11	4.11275e-10
hsa-miR-616-5p	-0.19542	2.87943	1.03383e-10	4.25474e-10
hsa-miR-548at-3p	-0.380581	-1.47647	1.06051e-10	4.3513e-10
hsa-miR-424-3p	0.199993	4.80369	1.11458e-10	4.55934e-10
hsa-miR-6764-5p	0.219918	0.0718377	1.17935e-10	4.80974e-10
hsa-miR-4755-5p	0.158875	2.80048	1.18305e-10	4.81034e-10
hsa-miR-1307-5p	-0.289188	0.657391	1.19995e-10	4.86448e-10
hsa-miR-4695-3p	0.267227	0.393805	1.25359e-10	5.06674e-10
hsa-miR-3928-3p	0.192128	1.02254	1.285e-10	5.17826e-10
hsa-miR-3682-5p	-0.804758	-3.8401	1.30319e-10	5.23594e-10
hsa-miR-548a-3p	-0.579	-3.10666	1.32293e-10	5.29955e-10
hsa-miR-6732-3p	0.317518	-1.24244	1.58732e-10	6.33991e-10
hsa-miR-1278	-1.13768	-4.18113	1.82294e-10	7.2596e-10
hsa-miR-6884-3p	0.282901	-0.860884	2.01134e-10	7.98639e-10
hsa-miR-5009-5p	0.270568	-0.971	2.44184e-10	9.6674e-10
hsa-miR-6134	-0.455566	-3.03643	2.45939e-10	9.70851e-10
hsa-miR-548ah-3p	-0.310532	-0.546929	2.49802e-10	9.83231e-10
hsa-miR-4766-3p	-0.821596	-3.86874	2.60724e-10	1.02325e-09
hsa-miR-4687-5p	0.265363	-0.0735835	2.66661e-10	1.04352e-09
hsa-miR-548p	-0.322978	-0.817134	3.06917e-10	1.1976e-09
hsa-miR-7113-5p	0.276316	-0.718399	3.21981e-10	1.25221e-09
hsa-miR-519a-5p	1.05216	-4.16824	3.22763e-10	1.25221e-09
hsa-miR-1224-3p	0.331956	0.353035	3.45474e-10	1.33649e-09
hsa-miR-10a-5p	-0.280679	5.74217	3.55737e-10	1.37227e-09
hsa-miR-5187-5p	0.404045	-1.99437	3.60892e-10	1.38821e-09
hsa-miR-9903	-0.392444	-1.55811	3.96276e-10	1.51999e-09
hsa-miR-342-3p	0.137046	8.32619	4.09141e-10	1.56491e-09
hsa-miR-1538	0.200733	1.17189	4.46165e-10	1.70171e-09
hsa-miR-543	0.342975	2.91094	4.71965e-10	1.79506e-09
hsa-miR-409-3p	0.353185	5.44544	5.24887e-10	1.99075e-09
hsa-miR-6738-3p	0.245862	-0.0422163	6.11196e-10	2.31162e-09
hsa-miR-3942-5p	-0.754764	-3.79077	6.2594e-10	2.36079e-09
hsa-miR-6877-5p	0.235133	0.328081	9.09285e-10	3.41992e-09
hsa-miR-6783-3p	0.229704	2.48101	9.3943e-10	3.52351e-09
hsa-miR-6771-3p	0.516664	-3.09651	9.60954e-10	3.59429e-09
hsa-miR-181b-3p	-0.8582	-4.02748	9.83548e-10	3.66866e-09
hsa-miR-186-3p	-0.513256	-2.86799	1.03696e-09	3.85725e-09
hsa-miR-3157-5p	-0.226578	0.578449	1.08184e-09	4.01317e-09
hsa-miR-548am-3p	-0.311911	-0.797987	1.18123e-09	4.36989e-09
hsa-miR-29a-3p	-0.222279	5.12223	1.21914e-09	4.49786e-09
hsa-miR-4635	0.26308	-0.244848	1.23175e-09	4.53205e-09
hsa-miR-7854-3p	0.286268	-1.10268	1.38041e-09	5.06526e-09
hsa-miR-4665-5p	0.344657	-1.85753	1.47702e-09	5.40509e-09
hsa-miR-3120-5p	0.642916	-3.6224	1.49416e-09	5.45307e-09
hsa-miR-6865-3p	0.400614	-2.0928	1.53081e-09	5.57183e-09
hsa-miR-4723-5p	0.266328	-1.00477	1.63158e-09	5.9227e-09
hsa-miR-671-5p	0.200818	0.489075	1.81987e-09	6.58851e-09
hsa-miR-181c-5p	-0.299111	-0.159066	2.0437e-09	7.37911e-09
hsa-miR-548aq-3p	-0.404951	-1.58312	2.07453e-09	7.4705e-09
hsa-miR-4454	-0.186085	5.0208	2.18543e-09	7.84901e-09
hsa-miR-3135a	-0.310221	-0.608633	2.19231e-09	7.85288e-09
hsa-miR-485-5p	0.393047	-0.542735	2.23537e-09	7.98599e-09
hsa-miR-6772-3p	0.421553	-2.5709	2.44406e-09	8.70858e-09
hsa-miR-194-3p	0.22922	0.0598995	2.51407e-09	8.93451e-09
hsa-miR-6894-3p	0.179039	2.93558	2.70156e-09	9.5757e-09
hsa-miR-4723-3p	0.284738	-0.909522	2.79384e-09	9.87693e-09
hsa-miR-610	0.225164	0.567035	2.89839e-09	1.02199e-08
hsa-miR-202-3p	0.394299	-1.54775	2.91466e-09	1.02505e-08
hsa-miR-3150a-3p	0.305294	-1.47855	3.02092e-09	1.05967e-08
hsa-miR-4999-3p	-0.87488	-3.98311	3.41625e-09	1.19525e-08
hsa-miR-520g-3p	1.06111	-4.17969	3.56915e-09	1.24552e-08
hsa-miR-6885-5p	0.273196	-0.807894	3.80805e-09	1.32547e-08
hsa-miR-338-3p	-0.49	-2.765	3.92573e-09	1.36293e-08
hsa-miR-1306-3p	0.253363	2.30876	5.08731e-09	1.76169e-08
hsa-miR-371b-5p	0.225654	-0.352542	5.70732e-09	1.97135e-08
hsa-miR-338-5p	-0.292454	0.463613	6.58419e-09	2.26845e-08
hsa-miR-655-3p	-0.532868	-2.68761	6.91523e-09	2.37645e-08
hsa-miR-134-5p	0.353554	0.686085	7.00331e-09	2.40063e-08
hsa-miR-642a-5p	0.25402	0.345254	7.08443e-09	2.4223e-08
hsa-miR-3620-3p	0.182661	3.6337	8.1646e-09	2.7846e-08
hsa-miR-199a-5p	-0.240366	3.33552	8.54771e-09	2.90794e-08
hsa-miR-1227-3p	0.170137	3.56301	8.57773e-09	2.91084e-08
hsa-miR-363-5p	0.200041	0.190989	8.66699e-09	2.93378e-08
hsa-miR-3611	-1.03733	-4.2455	9.27823e-09	3.13285e-08
hsa-miR-412-3p	0.701041	-3.47758	9.43967e-09	3.17943e-08
hsa-miR-323b-3p	0.354999	2.7307	9.89846e-09	3.32569e-08
hsa-miR-654-5p	0.374359	-1.28297	1.06e-08	3.55258e-08
hsa-miR-625-3p	-0.20276	5.86237	1.1228e-08	3.75376e-08
hsa-miR-4286	0.156009	5.00873	1.1901e-08	3.96324e-08
hsa-miR-6746-3p	0.473499	-3.05567	1.19131e-08	3.96324e-08
hsa-miR-6862-5p	0.272989	-1.11321	1.28191e-08	4.25419e-08
hsa-miR-4772-5p	-0.471805	-2.56971	1.30675e-08	4.32601e-08
hsa-miR-548z	-0.345727	3.12762	1.33581e-08	4.41143e-08
hsa-miR-628-3p	-0.237499	2.86576	1.36131e-08	4.48472e-08
hsa-miR-548h-3p	-0.344771	3.12548	1.42832e-08	4.68363e-08
hsa-miR-4677-3p	-0.242751	1.46222	1.42861e-08	4.68363e-08
hsa-miR-192-3p	-0.320049	-0.570886	1.53012e-08	5.00432e-08
hsa-miR-103a-3p	-0.224677	10.9525	1.66564e-08	5.4344e-08
hsa-miR-6804-3p	0.227514	-0.261959	1.81407e-08	5.90445e-08
hsa-miR-544b	-0.880895	-3.92066	1.93317e-08	6.27702e-08
hsa-miR-1237-3p	0.241064	-0.548706	2.0113e-08	6.51506e-08
hsa-miR-365b-5p	0.342186	-1.96716	2.03091e-08	6.55804e-08
hsa-miR-6735-5p	0.173591	1.59137	2.03425e-08	6.55804e-08
hsa-miR-433-3p	0.348316	1.2741	2.18e-08	7.01122e-08
hsa-miR-1233-3p	0.215412	-0.0603234	2.4009e-08	7.70335e-08
hsa-miR-3960	0.288855	4.71014	2.4314e-08	7.78277e-08
hsa-miR-125a-3p	0.342874	-2.07516	2.5272e-08	8.07035e-08
hsa-miR-92a-1-5p	0.293189	0.381135	2.83942e-08	9.04607e-08
hsa-miR-337-3p	-0.368964	1.40551	3.4397e-08	1.09328e-07
hsa-miR-491-5p	0.218328	0.706912	3.68583e-08	1.16876e-07
hsa-miR-579-5p	0.229227	0.0228759	4.11312e-08	1.30121e-07
hsa-miR-296-3p	0.387962	-2.52241	4.32411e-08	1.36477e-07
hsa-miR-3614-5p	0.317707	-1.29903	4.51021e-08	1.42019e-07
hsa-miR-885-5p	0.276609	-0.566475	4.70908e-08	1.47937e-07
hsa-miR-4669	0.640894	-0.713564	4.8859e-08	1.53137e-07
hsa-let-7g-3p	-0.455568	-2.93789	4.92168e-08	1.53902e-07
hsa-miR-10395-3p	0.539867	-3.21377	5.12322e-08	1.59835e-07
hsa-miR-6859-3p	0.156046	2.01577	5.65363e-08	1.75977e-07
hsa-miR-6809-3p	0.402352	-2.4948	5.68131e-08	1.76433e-07
hsa-miR-1270	0.224099	3.32138	6.51917e-08	2.0199e-07
hsa-miR-4754	0.340306	-2.16004	7.66158e-08	2.36458e-07
hsa-miR-889-3p	-0.835158	-4.08301	7.66655e-08	2.36458e-07
hsa-miR-2276-3p	0.263048	-0.990625	7.83736e-08	2.41177e-07
hsa-miR-580-5p	-0.861482	-4.18087	9.43251e-08	2.89606e-07
hsa-miR-4676-5p	0.206276	-0.646723	9.63032e-08	2.9501e-07
hsa-miR-1292-5p	0.166443	4.53567	1.06846e-07	3.26567e-07
hsa-miR-7-1-3p	-0.23047	3.45928	1.15212e-07	3.51345e-07
hsa-miR-197-3p	0.143395	8.1144	1.18084e-07	3.59293e-07
hsa-miR-629-3p	0.143018	1.99249	1.29995e-07	3.94648e-07
hsa-miR-548o-3p	-0.214717	2.60758	1.30417e-07	3.95045e-07
hsa-miR-9-3p	-0.359207	-1.8989	1.34986e-07	4.0797e-07
hsa-miR-24-2-5p	-0.270735	-0.943596	1.43435e-07	4.32542e-07
hsa-miR-627-3p	-0.205912	2.59002	1.45195e-07	4.36875e-07
hsa-miR-574-3p	0.122819	6.88557	1.50219e-07	4.50992e-07
hsa-miR-1294	0.188477	3.72417	1.71512e-07	5.13778e-07
hsa-miR-520h	0.975092	-4.24042	1.7511e-07	5.23398e-07
hsa-miR-4779	0.384769	-2.71469	1.76331e-07	5.25885e-07
hsa-miR-183-3p	-0.197281	4.9226	1.82808e-07	5.44003e-07
hsa-miR-196b-5p	-0.337625	1.468	2.19231e-07	6.50961e-07
hsa-miR-6507-5p	0.863749	-3.7426	2.19964e-07	6.5171e-07
hsa-miR-326	-0.197241	3.81137	2.23636e-07	6.61141e-07
hsa-miR-4301	0.212559	1.9051	2.30752e-07	6.80693e-07
hsa-miR-3680-5p	-0.522081	-3.46937	2.34756e-07	6.91e-07
hsa-miR-6509-3p	-0.150351	1.88703	2.38225e-07	6.9969e-07
hsa-miR-4732-5p	0.172655	5.64955	2.49933e-07	7.32488e-07
hsa-miR-548n	-0.799034	-4.14963	2.72314e-07	7.96357e-07
hsa-miR-3154	0.52002	-3.43588	2.74937e-07	8.02294e-07
hsa-miR-4660	0.306524	-1.81291	3.04218e-07	8.8583e-07
hsa-miR-3619-3p	0.251147	-1.30134	3.0699e-07	8.91983e-07
hsa-miR-7705	-0.705316	-3.94092	3.26987e-07	9.48052e-07
hsa-miR-4525	0.450048	-2.69005	3.38233e-07	9.78563e-07
hsa-miR-6866-3p	0.146591	0.974851	3.49257e-07	1.0083e-06
hsa-miR-99a-5p	-0.215531	4.40625	3.67335e-07	1.05824e-06
hsa-miR-11400	-0.331639	-1.13987	4.07563e-07	1.17163e-06
hsa-miR-4659b-3p	-0.182469	4.11137	4.13972e-07	1.18754e-06
hsa-miR-580-3p	-0.721179	-3.95258	4.24317e-07	1.21464e-06
hsa-miR-129-5p	0.303917	-1.65038	4.42148e-07	1.26301e-06
hsa-miR-4762-5p	-0.221496	-0.309268	4.52974e-07	1.29122e-06
hsa-miR-149-5p	-0.272628	-0.451492	4.59416e-07	1.30683e-06
hsa-miR-5003-3p	0.271472	-1.17031	4.88481e-07	1.38659e-06
hsa-miR-6818-3p	-0.166921	2.41907	5.13019e-07	1.4532e-06
hsa-miR-9985	-0.602041	-3.69736	5.36798e-07	1.51738e-06
hsa-miR-155-5p	0.164406	4.38908	5.56955e-07	1.57108e-06
hsa-miR-6818-5p	-0.276475	-1.63399	5.67714e-07	1.5981e-06
hsa-miR-548ak	-0.473309	-2.80611	6.42841e-07	1.80582e-06
hsa-miR-548x-3p	-0.693821	-4.11532	6.85373e-07	1.92131e-06
hsa-miR-6837-3p	0.210042	-0.951487	7.33511e-07	2.05201e-06
hsa-miR-6503-5p	0.245587	-1.3409	7.45906e-07	2.08238e-06
hsa-miR-32-5p	-1.35397	-1.69932	8.65173e-07	2.41038e-06
hsa-miR-6726-3p	0.180889	4.58676	8.70602e-07	2.42052e-06
hsa-miR-181a-3p	-0.194174	1.96181	8.76058e-07	2.4307e-06
hsa-miR-191-5p	-0.10264	15.3117	8.86259e-07	2.45398e-06
hsa-miR-548ae-3p	-0.439663	-3.13655	9.26039e-07	2.55889e-06
hsa-miR-3160-3p	-0.462571	-3.35549	1.01306e-06	2.79366e-06
hsa-miR-6820-3p	0.129127	1.55349	1.06109e-06	2.92017e-06
hsa-miR-376a-3p	-0.355608	-1.35925	1.06575e-06	2.92704e-06
hsa-miR-550a-3-5p	0.114127	4.5806	1.09753e-06	3.0082e-06
hsa-miR-4516	0.286568	-0.0594864	1.17459e-06	3.21292e-06
hsa-miR-548l	-0.385169	-1.40238	1.54065e-06	4.20572e-06
hsa-miR-8485	-0.300378	-1.25241	1.5596e-06	4.24889e-06
hsa-miR-3679-5p	0.351814	-2.58239	1.58992e-06	4.32279e-06
hsa-miR-6845-3p	0.277052	-1.64723	1.60932e-06	4.36677e-06
hsa-miR-7975	-0.666018	-4.05349	1.63489e-06	4.42728e-06
hsa-miR-3190-3p	0.285815	-2.19169	1.6993e-06	4.59253e-06
hsa-miR-324-5p	-0.109716	7.28812	1.74732e-06	4.71289e-06
hsa-miR-4690-3p	-0.296877	-1.85512	1.94424e-06	5.23359e-06
hsa-miR-6766-3p	0.158134	0.778617	2.06574e-06	5.54963e-06
hsa-miR-7112-3p	-0.588041	-3.76695	2.07807e-06	5.5717e-06
hsa-miR-3064-5p	0.282043	-1.66821	2.20735e-06	5.90662e-06
hsa-miR-150-5p	0.120632	11.1436	2.23428e-06	5.96689e-06
hsa-miR-6810-5p	0.459204	-3.37439	2.26227e-06	6.02976e-06
hsa-miR-4748	0.388052	-2.9212	2.28466e-06	6.07746e-06
hsa-miR-4746-5p	-0.20738	-0.46499	2.33822e-06	6.20774e-06
hsa-miR-506-3p	-0.666974	-4.00439	2.49691e-06	6.61609e-06
hsa-miR-6763-3p	0.33215	-2.38916	2.55582e-06	6.75894e-06
hsa-miR-223-5p	-0.313296	-0.13601	2.58889e-06	6.83306e-06
hsa-miR-3177-3p	0.155981	1.48832	2.72484e-06	7.17788e-06
hsa-miR-6810-3p	0.237743	-0.921253	2.73649e-06	7.19458e-06
hsa-miR-4804-5p	0.239579	-0.173384	2.80727e-06	7.36637e-06
hsa-miR-378a-5p	0.151178	5.82332	3.03732e-06	7.95461e-06
hsa-miR-6741-5p	0.391635	-2.99881	3.3757e-06	8.82373e-06
hsa-miR-7155-3p	0.138941	1.28249	3.39892e-06	8.86731e-06
hsa-miR-6766-5p	0.530347	-3.80701	3.70675e-06	9.6518e-06
hsa-miR-6867-3p	0.628958	-4.05745	4.16547e-06	1.08254e-05
hsa-miR-4632-3p	0.261431	-1.28786	4.17635e-06	1.08329e-05
hsa-miR-4668-5p	0.296257	-2.3276	4.32069e-06	1.11859e-05
hsa-miR-181d-5p	0.236622	-0.865074	4.45601e-06	1.15142e-05
hsa-miR-4655-5p	0.297785	-2.16954	4.50065e-06	1.16074e-05
hsa-miR-181b-5p	0.125406	5.20082	4.59774e-06	1.18353e-05
hsa-miR-589-5p	0.115462	4.88267	4.64303e-06	1.19189e-05
hsa-miR-93-5p	-0.205901	10.4129	4.64783e-06	1.19189e-05
hsa-miR-30a-3p	-0.308816	-0.126916	4.78867e-06	1.22568e-05
hsa-miR-487a-5p	0.357823	-2.19304	5.03135e-06	1.28537e-05
hsa-miR-548j-3p	-0.650544	-4.02125	5.08242e-06	1.29597e-05
hsa-miR-379-5p	-0.409926	-2.79652	5.42344e-06	1.38033e-05
hsa-miR-548c-5p	-0.409767	-1.66168	5.97447e-06	1.51772e-05
hsa-miR-548o-5p	-0.409183	-1.66142	6.13933e-06	1.55668e-05
hsa-miR-200a-3p	0.670318	-3.89492	6.30692e-06	1.59618e-05
hsa-miR-3150b-3p	0.264764	-1.73355	6.464e-06	1.63288e-05
hsa-miR-548bb-3p	-0.614708	-4.05371	6.5126e-06	1.64129e-05
hsa-miR-6848-5p	0.399544	-3.14397	6.52151e-06	1.64129e-05
hsa-miR-1537-3p	-0.671231	-4.09804	6.55229e-06	1.64597e-05
hsa-miR-16-1-3p	-0.562621	-3.71649	6.88756e-06	1.72699e-05
hsa-miR-6892-3p	0.714044	-4.11864	7.1219e-06	1.78245e-05
hsa-miR-1307-3p	0.185109	6.00136	7.73017e-06	1.93112e-05
hsa-miR-151a-3p	-0.156685	7.91269	7.77421e-06	1.93854e-05
hsa-miR-1236-5p	0.462408	-3.55313	8.39186e-06	2.08871e-05
hsa-miR-6769b-3p	0.195675	-0.77872	8.55381e-06	2.12511e-05
hsa-miR-3199	-0.204626	-1.05013	8.69107e-06	2.15526e-05
hsa-miR-382-5p	0.29271	0.866622	8.85154e-06	2.19104e-05
hsa-miR-3192-5p	0.325581	-2.30222	8.96468e-06	2.215e-05
hsa-miR-548am-5p	-0.406457	-1.7222	9.26583e-06	2.28523e-05
hsa-miR-6761-3p	0.376563	-3.1287	9.29813e-06	2.28903e-05
hsa-miR-3691-3p	0.178724	-0.544847	9.50454e-06	2.3356e-05
hsa-miR-4443	0.214347	2.99517	9.65964e-06	2.36941e-05
hsa-miR-6509-5p	0.234022	-1.63208	9.72205e-06	2.38041e-05
hsa-let-7i-3p	-0.168126	0.974558	1.00581e-05	2.45823e-05
hsa-miR-3074-5p	0.126369	2.3253	1.01569e-05	2.47792e-05
hsa-miR-1303	0.187542	3.12659	1.03969e-05	2.53192e-05
hsa-miR-1268b	0.331535	-1.94512	1.05556e-05	2.56593e-05
hsa-miR-6794-3p	0.33712	-2.68799	1.06292e-05	2.5792e-05
hsa-miR-330-3p	0.0946925	2.8926	1.08263e-05	2.62234e-05
hsa-miR-6837-5p	0.214339	-1.11839	1.10896e-05	2.68132e-05
hsa-miR-6826-3p	0.404517	0.540795	1.15433e-05	2.78603e-05
hsa-miR-1299	0.61635	1.98143	1.15934e-05	2.79315e-05
hsa-miR-1236-3p	0.155401	0.105467	1.19603e-05	2.87643e-05
hsa-miR-548aw	-0.468525	-3.58066	1.20452e-05	2.8917e-05
hsa-miR-4755-3p	0.189583	-1.04285	1.35886e-05	3.25646e-05
hsa-miR-33b-5p	-0.703163	-4.15312	1.47219e-05	3.52182e-05
hsa-miR-6820-5p	0.339744	-3.00559	1.59666e-05	3.81283e-05
hsa-miR-128-1-5p	0.222228	-1.75882	1.69671e-05	4.04463e-05
hsa-miR-6513-3p	-0.130169	4.16083	1.7427e-05	4.14695e-05
hsa-miR-5701	0.500695	-3.41541	1.78772e-05	4.24662e-05
hsa-miR-6501-5p	0.190305	0.0526886	1.97002e-05	4.66672e-05
hsa-miR-130b-5p	0.0942894	8.07359	1.97147e-05	4.66672e-05
hsa-miR-486-5p	0.120653	19.0188	1.98668e-05	4.69452e-05
hsa-miR-4750-5p	0.434102	-3.53796	2.07021e-05	4.88338e-05
hsa-miR-369-5p	-0.468691	-3.49857	2.13772e-05	5.03387e-05
hsa-miR-132-5p	-0.178227	-0.00983856	2.2545e-05	5.29758e-05
hsa-miR-1468-5p	0.147117	2.38069	2.25754e-05	5.29758e-05
hsa-miR-25-5p	0.139439	3.07009	2.29845e-05	5.38426e-05
hsa-miR-4753-3p	-0.148804	1.0909	2.3308e-05	5.45061e-05
hsa-miR-1289	-0.289152	-2.53131	2.37877e-05	5.5532e-05
hsa-miR-668-3p	0.322012	-2.14987	2.41627e-05	5.63103e-05
hsa-miR-30c-1-3p	0.143409	0.936971	2.5338e-05	5.8948e-05
hsa-miR-1285-3p	-0.0901598	4.82443	2.64275e-05	6.13772e-05
hsa-miR-4785	-0.242053	-1.44856	2.66368e-05	6.17572e-05
hsa-miR-23c	-0.190918	-0.154252	2.70008e-05	6.24942e-05
hsa-miR-130b-3p	-0.115021	5.71272	2.88198e-05	6.65905e-05
hsa-miR-148a-5p	-0.121914	2.39818	3.76605e-05	8.68693e-05
hsa-miR-1224-5p	0.305483	-1.84188	4.03003e-05	9.28004e-05
hsa-miR-127-5p	-0.51842	-3.87816	4.14653e-05	9.53209e-05
hsa-miR-6739-3p	-0.205892	-1.26582	4.38516e-05	0.000100636
hsa-miR-548ar-3p	-0.535825	-3.74447	4.554e-05	0.000104151
hsa-miR-517a-3p	0.525916	-3.08988	4.5614e-05	0.000104151
hsa-miR-517b-3p	0.525916	-3.08988	4.5614e-05	0.000104151
hsa-miR-6849-3p	0.164762	0.094159	4.77141e-05	0.000108762
hsa-miR-29b-1-5p	0.233702	-1.05651	4.82845e-05	0.000109878
hsa-miR-548aj-3p	-0.508913	-3.89289	5.27051e-05	0.000119736
hsa-miR-6716-3p	0.330769	-2.99922	5.50262e-05	0.0001248
hsa-miR-188-3p	-0.467199	-3.75965	5.66759e-05	0.000128326
hsa-miR-30c-5p	-0.115903	11.8858	6.41877e-05	0.000145092
hsa-miR-340-3p	-0.159144	5.75232	6.55356e-05	0.000147892
hsa-miR-1226-3p	0.108877	4.12952	6.80398e-05	0.000153288
hsa-miR-6852-3p	-0.193286	-0.827923	7.46368e-05	0.000167871
hsa-miR-26a-1-3p	-0.27134	-1.53209	7.63385e-05	0.000171414
hsa-miR-3140-3p	-0.162552	0.620803	7.70136e-05	0.000172643
hsa-miR-6759-5p	0.547315	-4.06024	7.86166e-05	0.000175945
hsa-miR-4745-5p	-0.335759	-2.7241	7.99468e-05	0.000178627
hsa-miR-9-5p	-0.325923	-1.74606	8.2307e-05	0.000183598
hsa-miR-30a-5p	-0.167672	4.78786	8.25027e-05	0.000183629
hsa-miR-641	-0.154558	2.24215	8.25922e-05	0.000183629
hsa-miR-423-3p	0.0996324	10.6652	8.55998e-05	0.000190004
hsa-miR-133b	-0.404631	-3.45509	8.6455e-05	0.00019114
hsa-miR-376b-3p	-0.681488	-4.27465	8.64591e-05	0.00019114
hsa-miR-3617-5p	0.425645	-3.65635	8.65354e-05	0.00019114
hsa-miR-3683	-0.628511	-4.20412	9.3126e-05	0.000205362
hsa-miR-4482-5p	0.398117	-2.96671	9.47649e-05	0.000208637
hsa-miR-1228-3p	0.207684	-0.297777	9.60634e-05	0.000211152
hsa-miR-501-5p	0.0999882	5.119	9.75445e-05	0.00021406
hsa-miR-3615	0.10362	9.96726	9.79756e-05	0.000214658
hsa-miR-381-3p	-0.344153	-2.66654	0.000105256	0.000230237
hsa-miR-7847-3p	0.325948	-1.37523	0.000105556	0.000230521
hsa-miR-6842-3p	0.119644	3.55459	0.000116702	0.000254452
hsa-miR-6783-5p	0.15047	-0.0554135	0.000126752	0.00027592
hsa-miR-4685-5p	0.546076	-3.99061	0.000129982	0.000282497
hsa-miR-4749-5p	0.308045	-2.97532	0.000131524	0.000285391
hsa-miR-212-5p	-0.179148	-0.950747	0.000138058	0.000299089
hsa-miR-3124-5p	0.226483	-1.59832	0.000138475	0.000299513
hsa-miR-941	0.109583	5.44459	0.000140622	0.000303672
hsa-miR-6718-5p	0.248999	-2.1414	0.000141024	0.000304055
hsa-miR-502-5p	-0.143885	1.48527	0.000144927	0.000311972
hsa-miR-4999-5p	-0.468689	-3.81196	0.000152404	0.000327547
hsa-miR-1284	-0.13274	2.53433	0.000154123	0.000330631
hsa-let-7g-5p	-0.204267	9.71128	0.000154327	0.000330631
hsa-miR-6884-5p	0.179342	-0.688963	0.000157252	0.000336266
hsa-miR-4758-3p	0.237624	-1.32702	0.000157454	0.000336266
hsa-miR-561-5p	-0.587123	-4.18108	0.000158442	0.000337843
hsa-miR-4749-3p	0.163568	-0.0687639	0.00016247	0.000345887
hsa-miR-6819-3p	0.12205	1.00808	0.000169159	0.000359562
hsa-miR-4753-5p	0.135607	0.54956	0.00017364	0.000368508
hsa-miR-6788-3p	0.544842	-4.07666	0.000181581	0.000384758
hsa-miR-3944-5p	0.117801	0.888018	0.000187978	0.00039769
hsa-miR-6879-3p	0.120237	1.41961	0.000189016	0.000398819
hsa-miR-6515-3p	0.126143	0.320838	0.0001891	0.000398819
hsa-miR-3679-3p	0.467992	-3.85597	0.000191619	0.000403502
hsa-miR-4747-5p	0.276773	-2.57602	0.000204869	0.000430733
hsa-miR-3182	-0.397358	-3.7915	0.00020762	0.000435841
hsa-miR-576-3p	-0.208416	2.20567	0.000217397	0.000455659
hsa-miR-5690	-0.167018	0.560647	0.000218995	0.000458298
hsa-miR-1271-5p	-0.134683	2.48223	0.000225071	0.000470286
hsa-miR-6747-3p	0.129101	5.112	0.000228819	0.000477382
hsa-miR-151a-5p	-0.0884567	10.5159	0.000242613	0.000505381
hsa-miR-6852-5p	0.112219	0.393162	0.000249691	0.000519326
hsa-miR-642b-5p	0.212072	-1.44918	0.000251174	0.00052161
hsa-miR-99b-3p	0.23602	-1.7785	0.000277756	0.000575929
hsa-miR-1273c	-0.130876	-0.050157	0.000294843	0.000610424
hsa-miR-6861-5p	0.385562	-3.56718	0.000310313	0.000641472
hsa-miR-5192	0.482728	-3.99894	0.000316291	0.000652832
hsa-miR-6876-5p	0.285236	-3.00063	0.000326732	0.000673356
hsa-miR-6779-3p	0.299063	-2.97963	0.000328498	0.000675966
hsa-miR-224-5p	-0.241518	0.0583628	0.000330709	0.000679485
hsa-miR-4795-3p	-0.51211	-4.01603	0.000335325	0.000687925
hsa-miR-6736-3p	0.278211	-2.96402	0.000336434	0.000689154
hsa-miR-6815-3p	-0.154797	-0.760016	0.000339736	0.000694868
hsa-miR-605-3p	-0.497949	-4.02859	0.000345001	0.000704572
hsa-miR-185-5p	-0.09098	11.5901	0.000351759	0.000717293
hsa-miR-1255b-5p	0.108614	2.12369	0.000356835	0.000726547
hsa-miR-3198	0.256598	-2.67319	0.000365504	0.000743081
hsa-miR-3164	0.207351	-1.93676	0.000366416	0.000743819
hsa-miR-6767-3p	0.258793	-2.66466	0.000380842	0.000771946
hsa-miR-7114-3p	0.325676	-3.32782	0.000403111	0.000815863
hsa-miR-548q	0.144395	1.05661	0.00040643	0.000821352
hsa-miR-3191-3p	0.305446	-3.17151	0.000407631	0.000822553
hsa-miR-548at-5p	-0.233019	-0.346016	0.000422271	0.000850827
hsa-miR-548j-5p	-0.247309	-0.780523	0.000462537	0.000930572
hsa-miR-628-5p	-0.174537	-0.814864	0.000494215	0.000992192
hsa-miR-6782-5p	0.364059	-3.60199	0.000494631	0.000992192
hsa-miR-4714-5p	-0.304756	-3.19175	0.000517425	0.00103638
hsa-miR-3158-5p	0.11933	0.5904	0.000537556	0.00107511
hsa-miR-1287-5p	0.193717	1.32104	0.000543241	0.00108488
hsa-miR-3150a-5p	0.0981528	1.03807	0.000582411	0.00116139
hsa-miR-6724-5p	0.299016	-3.1999	0.000583622	0.00116209
hsa-miR-376a-5p	-0.472567	-3.90943	0.000586331	0.00116577
hsa-miR-548as-5p	-0.433898	-3.91847	0.000601608	0.0011944
hsa-miR-3936	0.307698	-3.28895	0.000647485	0.00128359
hsa-miR-92a-2-5p	0.241924	-2.5655	0.000654911	0.00129642
hsa-miR-5010-3p	-0.078411	6.35751	0.000663959	0.00131241
hsa-miR-4488	0.198971	-1.23989	0.000671604	0.00132559
hsa-miR-6782-3p	0.0980766	0.738785	0.000682789	0.0013457
hsa-miR-6516-5p	-0.213064	-1.74659	0.000688037	0.00135407
hsa-miR-6778-3p	0.293472	-3.15774	0.000752528	0.00147884
hsa-miR-5684	-0.204371	-2.23183	0.000757593	0.00148664
hsa-miR-16-2-3p	-0.19444	10.1645	0.000799647	0.00156689
hsa-miR-132-3p	-0.108174	4.43922	0.000825305	0.00161483
hsa-miR-4670-5p	-0.335464	-3.53509	0.000932526	0.00182199
hsa-miR-5588-3p	0.161811	-1.35725	0.000957474	0.00186804
hsa-miR-6894-5p	0.320462	-3.40092	0.000975393	0.00190026
hsa-miR-6501-3p	0.287057	-3.23852	0.000979161	0.00190486
hsa-miR-4745-3p	0.120278	0.388123	0.000996231	0.00193529
hsa-miR-6758-5p	0.360731	-3.51638	0.00100235	0.00194438
hsa-miR-4687-3p	0.436068	-3.97686	0.00100871	0.00195393
hsa-miR-7151-3p	0.478554	-4.1532	0.00102339	0.00197953
hsa-miR-6869-5p	0.382496	-3.76174	0.00105167	0.00203134
hsa-miR-605-5p	0.216904	-1.75037	0.00106908	0.00206201
hsa-miR-504-5p	0.208761	0.439821	0.00108875	0.00209697
hsa-miR-6797-3p	0.138784	-0.566067	0.00109771	0.00211123
hsa-miR-5187-3p	-0.22395	-2.5392	0.00110548	0.00212315
hsa-miR-943	0.140271	-1.01207	0.00120245	0.00230612
hsa-miR-200b-5p	0.299599	-3.22497	0.00121405	0.00232507
hsa-miR-33b-3p	-0.220575	-2.34349	0.00129587	0.00247825
hsa-miR-196a-5p	-0.338244	-2.49417	0.00131805	0.00251712
hsa-miR-370-3p	0.213004	-0.94566	0.00136521	0.00260351
hsa-miR-1225-3p	0.313912	-3.27444	0.00137887	0.00262587
hsa-miR-6886-3p	0.232416	-2.21227	0.00141264	0.00268639
hsa-miR-3162-3p	0.170633	-1.20343	0.00143112	0.00271772
hsa-miR-24-1-5p	-0.290819	-3.23936	0.00160612	0.00304578
hsa-miR-3175	0.322008	-3.49824	0.0016631	0.00314943
hsa-miR-6821-5p	0.424773	-4.03147	0.00171275	0.00323891
hsa-miR-522-3p	0.454464	-3.8438	0.00176165	0.00332673
hsa-miR-5583-3p	-0.324734	-3.44406	0.00178048	0.00335762
hsa-miR-3122	0.227333	-2.73608	0.00179579	0.00338178
hsa-miR-6730-3p	0.128496	-0.0881248	0.001829	0.00343953
hsa-miR-6799-3p	0.133998	0.0575068	0.00187343	0.0035182
hsa-miR-181c-3p	-0.159721	-1.00647	0.00192896	0.00361747
hsa-miR-6731-3p	0.214454	-2.41886	0.00196348	0.00367712
hsa-miR-4726-5p	0.455864	-4.14319	0.00198475	0.00370942
hsa-miR-4647	0.274829	-3.16704	0.00198621	0.00370942
hsa-miR-128-3p	-0.092569	9.83439	0.00201208	0.00375256
hsa-miR-378c	-0.144056	2.69554	0.00205323	0.00382403
hsa-let-7c-5p	0.109195	5.86032	0.00205618	0.00382427
hsa-miR-4638-3p	-0.211729	-2.475	0.0021421	0.0039786
hsa-miR-3165	-0.210483	-2.50672	0.00218777	0.00405786
hsa-miR-11401	0.282679	2.10741	0.00225166	0.00417066
hsa-miR-4659b-5p	-0.163721	-0.433102	0.00227044	0.0041997
hsa-miR-5004-3p	0.277507	-3.35885	0.00228308	0.00421732
hsa-miR-4306	-0.105494	1.26181	0.00229273	0.00422937
hsa-miR-6738-5p	0.443547	-4.16084	0.00241331	0.00444575
hsa-miR-6890-5p	0.404611	-3.96111	0.00243616	0.00448173
hsa-miR-6874-3p	0.289358	-3.45656	0.00245962	0.00451875
hsa-miR-378e	-0.385061	-4.1073	0.00249924	0.00458107
hsa-miR-4750-3p	0.339804	-3.82064	0.0025003	0.00458107
hsa-miR-7851-3p	0.246335	-2.71921	0.00251072	0.00459394
hsa-miR-3620-5p	0.253631	-1.29211	0.00263424	0.00481344
hsa-miR-190b-5p	-0.17888	-0.11313	0.00265348	0.00484206
hsa-miR-6804-5p	0.135736	-0.699769	0.00287407	0.00523755
hsa-miR-3192-3p	0.197276	-2.26893	0.00294757	0.00536426
hsa-miR-4473	-0.118613	1.38116	0.00308513	0.00560707
hsa-miR-6832-5p	0.244044	-2.98687	0.00312264	0.00566763
hsa-let-7b-3p	-0.076103	6.20324	0.00314684	0.00570391
hsa-miR-193b-3p	0.137666	-0.337526	0.00322634	0.00584019
hsa-miR-323a-5p	0.393189	-3.97989	0.00332949	0.00601887
hsa-miR-505-3p	0.0654642	6.76834	0.00333606	0.0060227
hsa-miR-6775-3p	0.099718	0.902855	0.00338523	0.00610333
hsa-miR-378d	-0.162729	-1.02055	0.00344777	0.00620782
hsa-miR-6793-5p	0.246364	-3.05927	0.00347052	0.00624049
hsa-miR-1228-5p	-0.36021	-3.59638	0.00355233	0.00637912
hsa-miR-6809-5p	0.253518	-3.08207	0.0036712	0.00658385
hsa-miR-6817-3p	0.106524	1.16605	0.00379374	0.0067946
hsa-miR-4644	0.210599	-2.48002	0.00384358	0.00687478
hsa-miR-6762-3p	0.11823	-0.155308	0.00397284	0.0070966
hsa-miR-494-5p	0.345897	-3.78034	0.00411264	0.00733664
hsa-miR-518b	0.509856	-4.24579	0.00422057	0.00751927
hsa-miR-7109-3p	0.110456	-0.257392	0.00429091	0.00763455
hsa-miR-548an	-0.289752	-3.5166	0.00458195	0.00814167
hsa-miR-6777-3p	0.0948062	3.54858	0.00461693	0.00819309
hsa-miR-6776-3p	0.266345	-3.29794	0.00464283	0.00822827
hsa-miR-10398-3p	0.271019	-3.3812	0.00468611	0.00829411
hsa-miR-219b-3p	-0.505728	-4.29217	0.0049491	0.00874814
hsa-miR-6726-5p	0.370677	-3.98834	0.00497103	0.00877545
hsa-miR-548b-3p	-0.363868	-3.83609	0.00498919	0.00879605
hsa-miR-6803-5p	-0.388627	-4.01443	0.00518299	0.00912583
hsa-miR-3609	0.251001	-3.11949	0.00524474	0.00921955
hsa-miR-323a-3p	0.157205	2.06761	0.00524983	0.00921955
hsa-miR-6736-5p	0.283961	-3.51181	0.00542594	0.00951648
hsa-miR-212-3p	-0.210719	-2.71099	0.00546962	0.00958069
hsa-miR-6838-5p	0.431602	-4.14655	0.00560204	0.00979995
hsa-miR-4492	0.17561	-1.52393	0.00562581	0.00981985
hsa-miR-6798-5p	0.44427	-4.20581	0.00562792	0.00981985
hsa-miR-511-5p	-0.348065	-3.83182	0.00585585	0.0102044
hsa-miR-1250-5p	0.254072	-3.30347	0.00600024	0.0104426
hsa-miR-27b-5p	-0.164781	-1.86367	0.00621145	0.0107963
hsa-miR-6753-5p	0.380634	-3.91798	0.00623587	0.0108248
hsa-miR-4695-5p	0.356187	-3.95587	0.00624776	0.0108316
hsa-miR-769-3p	0.126817	-0.816751	0.00635374	0.0110012
hsa-miR-3909	0.124958	2.51367	0.00654805	0.0113232
hsa-miR-550b-2-5p	0.0991513	-0.210827	0.00665733	0.0114975
hsa-miR-4714-3p	-0.107433	-0.358106	0.00667959	0.0115212
hsa-miR-6880-3p	0.241894	-3.15829	0.00679867	0.0117117
hsa-miR-873-5p	-0.330779	-3.73549	0.00681892	0.0117317
hsa-miR-3692-3p	-0.183659	-2.54851	0.00691383	0.0118798
hsa-miR-6875-5p	0.171948	-2.26567	0.00711638	0.0122042
hsa-miR-3619-5p	-0.294933	-3.67261	0.00712063	0.0122042
hsa-miR-6514-3p	-0.0746746	1.98693	0.0073481	0.0125782
hsa-miR-1321	0.364668	-3.87888	0.00740736	0.0126636
hsa-miR-3136-5p	-0.195424	-2.59352	0.00751962	0.0128393
hsa-miR-5003-5p	-0.366267	-4.09006	0.00767362	0.0130857
hsa-miR-182-3p	-0.240981	-3.00905	0.00770283	0.013119
hsa-miR-4700-5p	0.407991	-4.09966	0.00778982	0.0132505
hsa-miR-4725-3p	0.294102	-3.66159	0.00785952	0.0133523
hsa-miR-6785-3p	0.270318	-3.49169	0.00791564	0.0134308
hsa-miR-100-5p	-0.350909	7.68478	0.00797999	0.013523
hsa-miR-548ai	-0.400159	-4.15537	0.00816016	0.0137982
hsa-miR-570-5p	-0.400066	-4.15515	0.00816274	0.0137982
hsa-miR-1229-5p	0.343292	-3.92139	0.00832826	0.0140604
hsa-miR-218-5p	-0.406253	-0.499069	0.00838009	0.0141303
hsa-miR-6821-3p	0.275936	-3.59693	0.00887721	0.0149499
hsa-miR-193b-5p	0.246355	-3.2485	0.00894532	0.0150459
hsa-miR-548ap-5p	-0.357987	-3.95243	0.00935693	0.0157187
hsa-miR-450a-1-3p	-0.293662	-3.61523	0.0094573	0.0158676
hsa-miR-3158-3p	0.079689	2.25047	0.00979156	0.0164081
hsa-miR-12136	0.113391	-0.260155	0.00985537	0.0164946
hsa-miR-874-5p	-0.124686	-1.18003	0.0107888	0.0180346
hsa-miR-4734	0.245025	-3.35842	0.0110183	0.0183956
hsa-miR-4654	0.413294	-4.22618	0.0110655	0.0184515
hsa-miR-452-5p	-0.194608	-2.42389	0.0111704	0.0186036
hsa-miR-6826-5p	0.214003	-2.56432	0.0119317	0.0198471
hsa-miR-2277-3p	0.105767	-0.443364	0.0119621	0.0198732
hsa-miR-3124-3p	-0.256427	-3.51941	0.0119834	0.0198843
hsa-miR-6774-3p	0.166034	-2.36084	0.0122626	0.0203227
hsa-miR-96-3p	-0.391703	-4.05286	0.0125339	0.0207467
hsa-miR-519d-3p	0.439354	-4.24122	0.0131835	0.0217955
hsa-miR-6737-3p	0.0990046	-0.571464	0.0132387	0.02186
hsa-miR-4479	0.151426	-2.13645	0.0133123	0.0219548
hsa-miR-4722-5p	0.247427	-3.46992	0.0134379	0.022135
hsa-miR-4717-3p	0.194081	-2.70665	0.0141938	0.0233516
hsa-miR-6807-5p	0.175613	-2.64556	0.0144007	0.0236633
hsa-miR-4784	0.229943	-2.73107	0.0145334	0.0238525
hsa-miR-6876-3p	0.215544	-3.26469	0.0148411	0.0243279
hsa-miR-625-5p	0.0843433	2.39736	0.0153226	0.0250868
hsa-miR-223-3p	-0.0742568	12.8104	0.0157142	0.0256969
hsa-miR-1260b	0.0846003	10.2695	0.0159259	0.0260117
hsa-miR-942-3p	0.076535	1.81794	0.016149	0.0263442
hsa-miR-4732-3p	0.0626601	8.98195	0.0162337	0.0264506
hsa-miR-1260a	0.0845964	10.2571	0.0163712	0.0266425
hsa-miR-597-3p	-0.095213	-0.0708865	0.0165029	0.0268247
hsa-miR-6813-5p	0.179467	-2.76854	0.0168811	0.0274065
hsa-miR-10392-5p	0.272934	-3.6736	0.0169918	0.0275531
hsa-miR-4747-3p	-0.155549	-2.05962	0.0171123	0.0277154
hsa-miR-6796-3p	0.232306	-3.11473	0.0173401	0.0280507
hsa-miR-4423-5p	0.254599	-3.55242	0.0173828	0.0280863
hsa-miR-4727-3p	0.176068	-2.54165	0.0183174	0.0295611
hsa-miR-5189-5p	0.16796	0.196854	0.0183425	0.0295663
hsa-miR-6836-3p	0.0850859	0.764879	0.018499	0.0297832
hsa-miR-377-5p	0.184563	-2.5284	0.0189579	0.0304857
hsa-miR-4436a	0.320629	-4.03343	0.0191673	0.0307578
hsa-miR-3117-3p	-0.19534	-2.58501	0.0191725	0.0307578
hsa-miR-3675-3p	0.230234	-2.38373	0.0192493	0.0308445
hsa-miR-6812-5p	-0.339724	-4.05201	0.019699	0.0315277
hsa-miR-548w	-0.290979	-3.88158	0.0201744	0.0322505
hsa-miR-937-5p	-0.361757	-4.17819	0.0203752	0.0325331
hsa-miR-30b-3p	-0.150573	-1.3132	0.0205404	0.0327582
hsa-miR-1972	-0.300328	-3.68676	0.0211745	0.03372
hsa-miR-6895-5p	0.228912	-3.5179	0.0211933	0.03372
hsa-miR-3920	-0.341787	-4.11053	0.0213031	0.033855
hsa-miR-6866-5p	0.0949366	-0.722077	0.0218887	0.0347448
hsa-miR-339-3p	-0.0781171	5.21179	0.0219411	0.0347872
hsa-miR-4482-3p	0.266382	0.540798	0.0223265	0.0353568
hsa-miR-5009-3p	-0.335444	-4.13554	0.0224414	0.0354973
hsa-miR-129-1-3p	0.126472	-1.30047	0.0225609	0.0356447
hsa-miR-3130-5p	-0.103828	2.23178	0.0228074	0.0359921
hsa-miR-6740-3p	0.168012	-2.84117	0.0233382	0.0367869
hsa-miR-2276-5p	0.270203	-3.83395	0.0236369	0.0371708
hsa-miR-4507	0.20669	-2.67928	0.0236628	0.0371708
hsa-miR-513c-5p	-0.275507	-3.78128	0.0236641	0.0371708
hsa-miR-660-3p	0.0788362	1.65052	0.0237409	0.0372482
hsa-miR-6833-5p	0.318549	-4.04309	0.023851	0.0373776
hsa-miR-3161	-0.301611	-3.50216	0.0239357	0.0374669
hsa-miR-3675-5p	-0.215106	-2.79222	0.0242978	0.0379898
hsa-miR-449c-5p	0.344372	-4.11656	0.0244861	0.0382401
hsa-miR-382-3p	-0.170158	-1.45201	0.0247159	0.0385545
hsa-miR-219a-1-3p	-0.0850882	-0.393635	0.0247536	0.038569
hsa-miR-191-3p	0.0544499	1.41363	0.0257781	0.040119
hsa-miR-4712-5p	-0.263877	-3.77184	0.0258393	0.0401681
hsa-miR-1910-5p	0.180158	-2.94545	0.0259212	0.0402492
hsa-miR-642b-3p	0.248782	-3.76029	0.0260338	0.0403778
hsa-miR-6781-3p	-0.202086	-3.25173	0.0262321	0.0406387
hsa-miR-28-5p	-0.0725481	4.27717	0.0265573	0.0410955
hsa-miR-4524a-3p	-0.291907	-3.85301	0.026615	0.0411379
hsa-miR-4326	-0.189343	5.29274	0.026787	0.0413565
hsa-miR-3174	-0.185016	-3.17742	0.0268187	0.0413583
hsa-miR-6853-3p	0.11646	-1.69698	0.027102	0.0417475
hsa-miR-6873-3p	0.0661022	1.58305	0.0271645	0.0417963
hsa-miR-139-5p	0.0979464	3.56243	0.0285867	0.0439347
hsa-miR-25-3p	-0.079463	12.9223	0.029425	0.0451718
hsa-miR-3614-3p	-0.348791	-4.21026	0.0297111	0.0455593
hsa-miR-296-5p	0.0855661	4.74363	0.02981	0.0456591
hsa-miR-551a	-0.158647	-2.42597	0.0303315	0.0464056
hsa-miR-422a	0.113617	-2.26376	0.0306852	0.0468936
hsa-miR-4657	0.154521	-2.56778	0.0314914	0.0480715
hsa-miR-92a-3p	0.0604541	17.3691	0.0322617	0.0491918
hsa-miR-6780a-3p	-0.084817	-0.362081	0.0323858	0.0493255
hsa-miR-4318	-0.223671	-3.89177	0.0325317	0.049492
hsa-miR-379-3p	-0.222583	-3.31092	0.032618	0.0495677
hsa-miR-5698	0.299851	-2.94609	0.03272	0.0496669
hsa-miR-6733-3p	-0.177594	-3.00139	0.0335789	0.0509135
hsa-miR-3180-3p	0.149235	-2.25363	0.0339349	0.051395
hsa-miR-449a	-0.352211	-4.18886	0.0339876	0.051395
hsa-miR-3180	0.149199	-2.25374	0.0340103	0.051395
hsa-miR-154-5p	0.15908	-1.69923	0.0340995	0.0514723
hsa-miR-497-5p	-0.262738	-3.82996	0.0342188	0.051595
hsa-miR-4467	-0.23621	-2.66581	0.0342997	0.0516594
hsa-miR-4661-5p	-0.0941402	0.0337876	0.0346088	0.0520671
hsa-miR-4435	0.0845401	0.208232	0.0348154	0.0523197
hsa-miR-127-3p	0.136559	0.670206	0.0356357	0.0534843
hsa-miR-766-5p	0.167988	-2.88752	0.0356694	0.0534843
hsa-miR-629-5p	-0.0652867	7.29014	0.0357387	0.053529
hsa-miR-6784-3p	0.223531	-3.65932	0.0363576	0.0543958
hsa-miR-4511	-0.0702209	1.5865	0.0364036	0.0544044
hsa-miR-3918	0.179754	-3.18523	0.0365395	0.0545474
hsa-miR-6759-3p	0.284615	-4.05597	0.0369422	0.0550878
hsa-miR-3690	0.163358	-1.55657	0.0390331	0.0581418
hsa-miR-6513-5p	0.0969271	-1.07651	0.03993	0.0594123
hsa-miR-3139	-0.248728	-3.85989	0.039988	0.0594333
hsa-miR-5588-5p	0.18086	-3.27391	0.0417758	0.0620225
hsa-miR-412-5p	0.240713	-3.79695	0.0426557	0.0632594
hsa-miR-7108-3p	0.132542	-2.27025	0.0427083	0.0632682
hsa-miR-6750-3p	0.0668869	1.49433	0.0430656	0.0637276
hsa-miR-4508	0.141706	6.5356	0.0434022	0.064106
hsa-miR-7977	0.046905	3.77755	0.0434159	0.064106
hsa-miR-6752-3p	0.120719	-1.87414	0.0440975	0.0650414
hsa-miR-3155a	-0.294723	-4.10445	0.0449889	0.066284
hsa-miR-508-3p	-0.229692	-3.65999	0.0451772	0.066489
hsa-miR-4763-5p	0.101419	-0.953347	0.045767	0.067284
hsa-miR-3163	0.0708966	1.22177	0.0460424	0.0676154
hsa-miR-4742-5p	-0.110266	-1.11574	0.0462619	0.0678641
hsa-miR-6805-5p	0.138956	-2.07962	0.0484126	0.0709422
hsa-miR-6861-3p	0.0781694	-0.433999	0.0497711	0.0727921
hsa-miR-4449	0.15066	-2.79218	0.0497825	0.0727921
hsa-miR-3121-3p	-0.157747	-2.86856	0.0498771	0.0728517
hsa-miR-3194-3p	-0.187055	-3.35211	0.0510108	0.0744273
hsa-miR-204-5p	0.133784	0.346873	0.0510803	0.0744485
hsa-miR-4484	0.199856	-3.62713	0.0518812	0.0755346
hsa-miR-222-3p	0.061477	5.9013	0.0521239	0.0758065
hsa-miR-6800-3p	0.133869	-2.4207	0.0523544	0.0760599
hsa-miR-421	-0.0633729	5.00565	0.0539124	0.0782394
hsa-miR-378g	0.116846	-2.49618	0.0544098	0.0788768
hsa-miR-5090	0.0850398	-0.12459	0.0549781	0.0796154
hsa-miR-4767	0.243961	-3.95723	0.0555736	0.0803917
hsa-miR-762	-0.332854	-4.27502	0.0589267	0.0850831
hsa-miR-3144-3p	0.244304	-3.89217	0.0589424	0.0850831
hsa-miR-6847-5p	0.130282	-2.56799	0.0590164	0.0850992
hsa-miR-500b-3p	-0.103702	-1.68481	0.0598254	0.0861741
hsa-miR-2278	0.107766	-1.81281	0.0600262	0.0863713
hsa-miR-1248	0.191702	-3.47478	0.0612139	0.0879868
hsa-miR-4640-3p	0.272056	-4.12613	0.0624377	0.0895933
hsa-miR-590-3p	-1.35834	-3.45487	0.0624639	0.0895933
hsa-miR-1914-5p	0.101387	-1.3746	0.0627322	0.089883
hsa-miR-6875-3p	0.0895466	-1.07554	0.0646485	0.0925307
hsa-miR-4423-3p	-0.297266	-4.19964	0.065466	0.0936018
hsa-miR-29c-5p	-0.0561545	5.429	0.0677988	0.096835
hsa-miR-4787-5p	0.136991	-2.39448	0.068636	0.0979275
hsa-miR-221-3p	0.0871337	7.62625	0.0687443	0.0979787
hsa-miR-6847-3p	0.136619	-2.77351	0.0689383	0.0981519
hsa-miR-6764-3p	-0.122447	-2.3061	0.0694138	0.0986816
hsa-miR-6739-5p	0.143174	-3.02262	0.0694561	0.0986816
hsa-miR-4772-3p	0.108305	1.92202	0.0696644	0.0988738
hsa-miR-6801-5p	0.168363	-3.25251	0.0754245	0.106937
hsa-miR-1910-3p	0.25412	-4.0933	0.0763966	0.108202
hsa-miR-125b-2-3p	0.162493	-3.41903	0.0776574	0.109873
hsa-miR-4672	0.0707571	0.64713	0.0783568	0.110746
hsa-miR-495-3p	-0.109546	1.31752	0.0798524	0.112743
hsa-miR-6805-3p	0.154979	-3.16727	0.0805705	0.113638
hsa-miR-6824-3p	0.175039	-3.40989	0.0820002	0.115431
hsa-miR-6742-3p	-0.220724	-3.93408	0.0820123	0.115431
hsa-miR-3160-5p	-0.170065	-3.47413	0.0822948	0.115708
hsa-miR-5004-5p	0.191035	-3.69166	0.0825534	0.115952
hsa-miR-1255a	-0.101945	-0.0990752	0.0828822	0.116293
hsa-miR-5189-3p	0.140932	3.42836	0.0849953	0.119134
hsa-miR-6785-5p	0.274595	-4.20655	0.0880899	0.123344
hsa-miR-2277-5p	0.111614	-2.50961	0.0896307	0.125324
hsa-miR-6801-3p	0.166096	-3.24478	0.0896888	0.125324
hsa-miR-3157-3p	0.0764943	0.194858	0.0909709	0.126984
hsa-miR-6789-3p	0.0921396	-1.66932	0.092193	0.128558
hsa-miR-346	0.153528	-2.06994	0.0925959	0.128987
hsa-miR-584-5p	0.0659677	7.03058	0.0927683	0.129094
hsa-miR-4757-5p	-0.252166	-4.11691	0.0946842	0.131429
hsa-miR-3940-3p	0.063512	7.18196	0.0946979	0.131429
hsa-miR-5001-3p	0.0607623	3.36985	0.0947375	0.131429
hsa-miR-508-5p	-0.218306	-3.93943	0.0963087	0.133439
hsa-miR-6730-5p	0.160078	-3.15247	0.0963836	0.133439
hsa-miR-6858-3p	0.126067	-2.38771	0.0995524	0.137685
hsa-miR-1295a	0.247752	-3.81684	0.100691	0.139119
hsa-miR-224-3p	-0.225062	-4.05278	0.106854	0.147482
hsa-miR-939-3p	0.185103	-3.7553	0.107078	0.147642
hsa-miR-125b-5p	-0.102166	7.66173	0.10759	0.148196
hsa-miR-6777-5p	-0.195307	-3.75877	0.109083	0.150101
hsa-miR-1287-3p	-0.155624	-3.41809	0.10976	0.150878
hsa-miR-409-5p	-0.111978	-1.68103	0.110733	0.152062
hsa-miR-371b-3p	0.160832	-3.54488	0.111676	0.153201
hsa-miR-548s	-0.152127	-3.39362	0.11209	0.153613
hsa-miR-138-2-3p	-0.215396	-3.97291	0.112433	0.153928
hsa-miR-935	0.111816	-2.03089	0.114584	0.156714
hsa-miR-1256	-0.101411	-2.24275	0.115295	0.157527
hsa-miR-219b-5p	-0.0640889	-0.202985	0.115939	0.158247
hsa-miR-5088-3p	-0.220039	-4.05248	0.116193	0.158434
hsa-miR-4707-3p	0.181668	2.21596	0.120474	0.164107
hsa-miR-589-3p	0.0498618	1.75091	0.121769	0.165704
hsa-miR-1255b-2-3p	-0.116439	-2.05299	0.122455	0.16647
hsa-miR-3129-3p	-0.111322	-2.39746	0.122619	0.166525
hsa-miR-329-3p	0.0910345	2.74661	0.127485	0.17296
hsa-miR-6505-5p	0.0841704	-1.87731	0.128631	0.174302
hsa-miR-933	-0.106656	-2.51766	0.128731	0.174302
hsa-miR-6832-3p	0.0767759	-1.53865	0.130453	0.176456
hsa-miR-1343-3p	0.0565146	2.02538	0.130595	0.176472
hsa-miR-769-5p	-0.0494454	2.25398	0.132052	0.178263
hsa-miR-5188	-0.0927053	-2.33887	0.132445	0.178616
hsa-miR-2467-3p	0.202898	-4.03965	0.133252	0.179525
hsa-miR-6780b-3p	0.0550456	-0.126858	0.134507	0.181029
hsa-miR-6856-3p	0.196048	-3.9695	0.134635	0.181029
hsa-miR-6796-5p	0.182681	-3.70794	0.134992	0.181328
hsa-miR-34b-3p	0.115678	-2.71315	0.135469	0.181652
hsa-miR-766-3p	0.0383044	4.00227	0.135501	0.181652
hsa-miR-664a-3p	-0.0340243	6.30171	0.137513	0.184166
hsa-miR-99b-5p	-0.0509455	5.60092	0.138042	0.184693
hsa-miR-410-3p	-0.173158	-3.69965	0.139438	0.186376
hsa-miR-6508-3p	-0.101222	-2.52465	0.140326	0.187378
hsa-miR-34c-3p	-0.229247	-4.17359	0.142086	0.189542
hsa-miR-3168	0.0698425	-1.63315	0.142831	0.190348
hsa-miR-3682-3p	0.100355	-1.97549	0.143334	0.19083
hsa-miR-4724-5p	0.208599	-4.08287	0.147249	0.195849
hsa-miR-2355-5p	-0.174979	-3.82662	0.147464	0.195943
hsa-miR-4497	0.0956407	-0.74369	0.148603	0.197264
hsa-miR-3125	0.152152	-3.2468	0.149588	0.198376
hsa-miR-502-3p	0.0396392	7.12837	0.152236	0.20161
hsa-miR-3176	-0.0986381	-1.94761	0.152345	0.20161
hsa-miR-203a-3p	0.182783	-3.02342	0.152473	0.20161
hsa-miR-4751	0.206923	-4.02171	0.153197	0.202369
hsa-let-7d-5p	0.0500285	10.1206	0.156931	0.2071
hsa-miR-6771-5p	0.20678	-4.1058	0.158906	0.209503
hsa-miR-6807-3p	0.0856216	-2.06522	0.164264	0.216356
hsa-miR-493-3p	0.102303	-1.56998	0.165111	0.217244
hsa-miR-154-3p	-0.243854	-4.26463	0.165327	0.217244
hsa-miR-494-3p	-0.0825291	2.0916	0.16542	0.217244
hsa-miR-6862-3p	0.102165	-2.75813	0.166307	0.21804
hsa-miR-3146	0.0965876	-2.67488	0.166348	0.21804
hsa-miR-4727-5p	-0.197352	-4.03507	0.167078	0.218785
hsa-miR-6874-5p	0.203598	-4.1369	0.16762	0.219111
hsa-miR-6770-3p	-0.155696	-3.78577	0.16765	0.219111
hsa-miR-1268a	-0.138227	-1.65662	0.168193	0.219608
hsa-miR-5587-5p	-0.152237	-3.6353	0.168675	0.220024
hsa-miR-548t-5p	-0.137617	-3.41653	0.168894	0.220098
hsa-miR-95-3p	0.112347	-2.80599	0.169516	0.220697
hsa-miR-6891-3p	0.214655	-4.20898	0.170408	0.221645
hsa-miR-378i	0.0596726	1.72698	0.172306	0.223899
hsa-miR-708-5p	-0.132028	-2.87708	0.17266	0.224027
hsa-miR-7849-3p	0.164821	-3.87855	0.172736	0.224027
hsa-miR-152-3p	-0.0538032	1.72563	0.175219	0.227031
hsa-miR-4797-5p	-0.174962	-3.9309	0.176961	0.229068
hsa-miR-6857-3p	0.042501	0.600255	0.183476	0.237274
hsa-miR-3617-3p	0.106999	-2.72232	0.184247	0.238044
hsa-miR-487a-3p	-0.108138	-2.29887	0.184669	0.238363
hsa-miR-6503-3p	-0.0767273	-2.02681	0.185661	0.239414
hsa-miR-503-5p	0.0501388	5.01765	0.187591	0.241672
hsa-miR-8072	0.187704	-3.98457	0.187902	0.241843
hsa-miR-1178-3p	0.0695789	-1.40833	0.189881	0.244158
hsa-miR-10400-5p	0.0789422	-1.20621	0.191291	0.245738
hsa-miR-4422	-0.0921296	-1.91134	0.191502	0.245777
hsa-miR-4659a-5p	0.0667006	-1.16396	0.192981	0.24744
hsa-miR-3187-5p	0.174982	-4.02611	0.193431	0.247694
hsa-miR-7846-3p	-0.188767	-4.09145	0.193545	0.247694
hsa-miR-181a-5p	-0.050124	9.67332	0.198329	0.253576
hsa-miR-6781-5p	0.125198	-3.43119	0.200524	0.255952
hsa-miR-331-5p	-0.0472814	2.34385	0.200565	0.255952
hsa-miR-4799-5p	0.115323	-3.14866	0.201482	0.25688
hsa-miR-6825-3p	0.100502	-2.72397	0.203489	0.259195
hsa-miR-6508-5p	0.120517	-3.45772	0.204112	0.259744
hsa-miR-4707-5p	0.118039	-2.06262	0.205129	0.260793
hsa-miR-3149	-0.19512	-4.07017	0.206944	0.262738
hsa-miR-6881-5p	0.167252	-3.95748	0.207047	0.262738
hsa-miR-4466	0.129394	-3.31853	0.207808	0.263457
hsa-miR-1343-5p	0.181017	-3.89409	0.208298	0.263831
hsa-miR-659-5p	0.0724872	-1.71679	0.208633	0.264008
hsa-miR-3137	0.139022	-3.75964	0.209596	0.264979
hsa-miR-4796-3p	-0.152913	-3.88471	0.210079	0.265107
hsa-miR-4521	-0.0522807	-0.383157	0.210089	0.265107
hsa-miR-5006-3p	-0.0566831	0.99821	0.210848	0.265818
hsa-miR-4485-3p	0.141981	-3.559	0.211624	0.266547
hsa-miR-1908-3p	0.125147	-3.47959	0.213712	0.268928
hsa-miR-503-3p	0.0861185	-2.5401	0.21393	0.268952
hsa-miR-1-3p	-0.132228	-3.12714	0.215625	0.270832
hsa-miR-1913	0.120353	-3.39356	0.219211	0.275081
hsa-miR-5196-3p	0.0845314	-2.29349	0.221063	0.277148
hsa-miR-3183	0.179212	-4.12515	0.222178	0.278288
hsa-miR-6838-3p	0.156046	-3.94049	0.223435	0.279604
hsa-miR-18a-3p	0.0237663	7.92054	0.225638	0.2821
hsa-miR-3144-5p	-0.136483	-3.62006	0.226125	0.282447
hsa-miR-2116-3p	-0.0856058	-2.42951	0.22673	0.282943
hsa-miR-6758-3p	0.0383786	1.06471	0.227133	0.283184
hsa-let-7e-3p	-0.0901225	-2.53762	0.227999	0.284002
hsa-miR-496	-0.107508	-2.65237	0.229411	0.285499
hsa-miR-6827-3p	0.161817	-4.0116	0.232631	0.28924
hsa-miR-6763-5p	0.156657	-3.97762	0.234013	0.290691
hsa-miR-210-3p	0.058032	3.79775	0.236363	0.293108
hsa-miR-6850-5p	0.0700801	-1.77181	0.236448	0.293108
hsa-let-7i-5p	-0.0581319	9.63183	0.236608	0.293108
hsa-miR-339-5p	-0.0442388	6.52132	0.236905	0.293208
hsa-miR-3115	-0.171479	-4.08513	0.237323	0.293458
hsa-miR-6731-5p	0.164836	-4.0416	0.238651	0.294829
hsa-miR-4469	0.149391	-3.93052	0.239048	0.294882
hsa-miR-4437	0.135382	-3.72827	0.239129	0.294882
hsa-miR-4670-3p	-0.0875723	-2.74669	0.239754	0.295326
hsa-miR-1298-5p	-0.194606	-4.25455	0.239925	0.295326
hsa-miR-1262	0.118201	-3.37881	0.240319	0.295542
hsa-miR-299-5p	0.0902927	-2.18878	0.244223	0.300071
hsa-miR-450a-2-3p	0.0597078	-1.03626	0.246126	0.302135
hsa-miR-431-5p	-0.0762111	-0.614681	0.251351	0.308269
hsa-miR-3188	0.0858546	-1.94803	0.255065	0.312542
hsa-miR-873-3p	0.134799	-3.82946	0.256298	0.313526
hsa-miR-1281	0.182815	-4.20798	0.256332	0.313526
hsa-miR-4708-3p	0.140972	-3.84245	0.25782	0.315062
hsa-miR-4639-3p	-0.0658898	-1.89127	0.258284	0.315345
hsa-miR-4448	-0.0345014	2.0966	0.260555	0.317669
hsa-miR-6840-5p	0.0821767	-0.805831	0.260657	0.317669
hsa-miR-4781-5p	0.0626158	-1.86129	0.262328	0.319243
hsa-miR-4722-3p	0.136341	-3.89955	0.262567	0.319243
hsa-miR-146a-5p	0.0372711	5.42472	0.262657	0.319243
hsa-miR-4725-5p	0.17271	-4.1567	0.262966	0.319279
hsa-miR-501-3p	-0.0260528	7.49509	0.263157	0.319279
hsa-miR-7106-3p	0.0511447	-1.03165	0.264131	0.320174
hsa-miR-6770-5p	-0.0991958	-3.27083	0.265545	0.321509
hsa-miR-3667-5p	-0.0798987	2.148	0.265708	0.321509
hsa-miR-1246	0.113539	-2.15592	0.267327	0.323179
hsa-miR-106b-3p	0.035667	9.41437	0.267825	0.323493
hsa-miR-4787-3p	0.0874671	-2.81638	0.271177	0.32696
hsa-miR-7151-5p	0.169944	-4.15706	0.271431	0.32696
hsa-miR-6829-3p	0.140632	-3.87476	0.271646	0.32696
hsa-miR-6882-5p	0.0507767	-1.04709	0.271662	0.32696
hsa-miR-6755-5p	0.0868853	-2.96111	0.275234	0.330965
hsa-miR-124-3p	-0.1789	-4.21922	0.279093	0.335307
hsa-miR-2115-5p	-0.0675533	-2.04956	0.279544	0.335552
hsa-miR-6751-3p	0.0968455	-3.30397	0.280815	0.336779
hsa-miR-6851-3p	-0.0522304	-1.146	0.286121	0.342839
hsa-miR-1180-5p	0.100484	-3.32073	0.286701	0.34323
hsa-miR-4433b-3p	0.0871422	-2.2765	0.288015	0.344498
hsa-miR-378a-3p	-0.0334509	7.53756	0.295856	0.353565
hsa-miR-133a-3p	-0.0696606	1.79699	0.297525	0.355246
hsa-miR-4709-5p	0.130033	-3.94336	0.29791	0.355392
hsa-miR-493-5p	0.0812651	-0.566523	0.299029	0.356414
hsa-miR-4474-3p	-0.120156	-3.77837	0.300121	0.357399
hsa-miR-4642	-0.166699	-4.08597	0.308025	0.36649
hsa-miR-6816-3p	0.0500618	-0.923238	0.311468	0.370015
hsa-miR-584-3p	-0.0348544	1.86206	0.311534	0.370015
hsa-miR-7155-5p	0.0930283	-3.30222	0.313697	0.372258
hsa-miR-942-5p	-0.0251509	9.2097	0.317139	0.37601
hsa-miR-3200-5p	-0.0310175	5.80373	0.317568	0.37601
hsa-miR-4317	-0.135965	-4.00994	0.317768	0.37601
hsa-miR-6890-3p	-0.169365	-4.22048	0.318	0.37601
hsa-miR-4773	-0.104096	-3.35238	0.318248	0.37601
hsa-miR-6877-3p	-0.0839155	-3.05987	0.320765	0.378654
hsa-miR-135a-2-3p	-0.10147	-3.69397	0.32303	0.380995
hsa-miR-6825-5p	0.0910223	-2.49285	0.323903	0.381693
hsa-miR-4489	0.0695541	-2.53062	0.324465	0.382022
hsa-miR-1185-1-3p	0.109651	-3.71317	0.324876	0.382174
hsa-miR-4446-5p	0.128247	-3.944	0.325621	0.382718
hsa-miR-187-3p	0.153219	-4.14904	0.326821	0.383795
hsa-miR-10396b-3p	-0.146284	-4.14732	0.328883	0.385882
hsa-miR-6729-5p	0.087183	-3.18741	0.330959	0.387981
hsa-miR-10a-3p	-0.0955035	-3.48357	0.334818	0.392165
hsa-miR-425-5p	0.022413	11.4287	0.336344	0.393613
hsa-miR-4664-3p	0.0869302	-3.33279	0.337114	0.394173
hsa-miR-10397-5p	-0.0656095	-2.48154	0.340475	0.39776
hsa-miR-125b-1-3p	0.0980975	-2.60776	0.347191	0.405256
hsa-miR-93-3p	-0.0214266	7.91316	0.352021	0.410539
hsa-miR-618	0.042801	2.16078	0.35401	0.412504
hsa-miR-5585-3p	-0.0855691	-2.60674	0.355136	0.413461
hsa-miR-4804-3p	0.0423697	1.13716	0.359023	0.417627
hsa-miR-6742-5p	0.0856639	-3.47704	0.3635	0.422471
hsa-miR-1302	0.122759	-3.97797	0.370415	0.430139
hsa-miR-559	-0.103897	-3.77239	0.373304	0.433122
hsa-miR-539-5p	-0.0785478	-2.93938	0.374102	0.433676
hsa-miR-3922-3p	-0.093479	-3.56798	0.374586	0.433866
hsa-miR-3200-3p	0.0280964	4.39634	0.375351	0.43438
hsa-miR-147b-3p	-0.124991	-4.08916	0.379394	0.438494
hsa-miR-1909-5p	0.0843344	-3.43836	0.379554	0.438494
hsa-miR-31-5p	-0.0555541	-1.75278	0.381632	0.440482
hsa-miR-30d-5p	-0.0209074	12.9503	0.38202	0.440482
hsa-miR-6895-3p	0.0620342	-2.40331	0.38225	0.440482
hsa-miR-4512	-0.0799702	-3.24575	0.382966	0.440932
hsa-miR-425-3p	-0.0191326	4.88658	0.383491	0.441162
hsa-miR-4688	0.0790733	-3.37444	0.388372	0.446397
hsa-miR-3191-5p	0.0537866	-2.23083	0.390938	0.448966
hsa-miR-7-2-3p	-0.0835896	-3.49096	0.393845	0.45192
hsa-miR-211-5p	-0.0324864	0.177276	0.394708	0.452527
hsa-miR-1288-3p	-0.0482601	-1.55932	0.397546	0.455395
hsa-miR-411-3p	-0.0678077	-1.93852	0.408283	0.467299
hsa-miR-6753-3p	0.0659476	-2.96264	0.412681	0.471934
hsa-miR-6893-3p	0.0481052	-1.78009	0.419276	0.479072
hsa-miR-5100	-0.0288295	5.28758	0.420104	0.479613
hsa-miR-2115-3p	0.0446713	-1.64336	0.422362	0.481784
hsa-miR-23b-5p	0.0326611	-0.575854	0.425185	0.484596
hsa-miR-5001-5p	0.0849943	-3.6887	0.435878	0.496366
hsa-miR-3939	-0.0422841	-1.71364	0.438043	0.498412
hsa-miR-3150b-5p	-0.0542168	-2.53522	0.440208	0.500455
hsa-miR-487b-3p	-0.0469476	0.931333	0.443122	0.503345
hsa-miR-222-5p	-0.111795	-4.11327	0.444041	0.503966
hsa-miR-7703	0.0617655	-2.99627	0.446444	0.506269
hsa-miR-1276	0.0536059	-2.51695	0.449341	0.509128
hsa-miR-513a-5p	0.109181	-4.13956	0.450081	0.50954
hsa-miR-6868-3p	-0.0586959	0.409065	0.452046	0.511337
hsa-miR-6846-3p	0.0889078	-3.85304	0.455318	0.514608
hsa-miR-10398-5p	-0.0616347	-3.01131	0.459246	0.518615
hsa-miR-4526	-0.0846458	-3.71202	0.462573	0.521534
hsa-miR-1285-5p	0.017367	3.6456	0.462602	0.521534
hsa-miR-6843-3p	-0.0553464	-2.70519	0.463957	0.522628
hsa-miR-320a-5p	-0.0405501	-1.62959	0.4728	0.532146
hsa-miR-3928-5p	0.0634077	-3.30869	0.479686	0.539448
hsa-miR-1843	-0.0205214	2.7827	0.481755	0.541324
hsa-miR-6727-5p	0.0954131	-4.01184	0.484688	0.544169
hsa-miR-3195	-0.0467349	-2.17305	0.48698	0.546289
hsa-miR-3685	0.0327231	-1.32978	0.489156	0.548276
hsa-miR-3940-5p	0.106054	-4.11073	0.491844	0.550832
hsa-miR-370-5p	0.10337	-4.15439	0.496207	0.55526
hsa-miR-6889-3p	0.0290744	-0.746989	0.496935	0.555616
hsa-miR-4762-3p	0.0692092	-3.58361	0.503517	0.56251
hsa-miR-6769a-3p	0.0727418	-3.65654	0.506834	0.565749
hsa-miR-4781-3p	-0.0211618	1.6609	0.508064	0.566654
hsa-miR-500a-3p	-0.0199602	6.77818	0.50882	0.567031
hsa-miR-891a-5p	0.0665998	-3.40766	0.509762	0.567613
hsa-miR-449b-3p	0.0825105	-3.91264	0.510243	0.567682
hsa-miR-6089	0.0810116	-3.89686	0.515095	0.57261
hsa-miR-6768-5p	0.0581374	-3.21308	0.516073	0.573226
hsa-miR-4800-3p	0.0651838	-3.66054	0.519605	0.576676
hsa-miR-6855-3p	0.020532	0.70377	0.52041	0.577097
hsa-miR-129-2-3p	-0.0350445	-1.59479	0.521084	0.577372
hsa-miR-1292-3p	-0.0276914	-0.523044	0.527158	0.583624
hsa-miR-5000-3p	-0.079347	-3.94608	0.534782	0.591581
hsa-miR-4743-3p	0.0676478	-3.65211	0.536285	0.592493
hsa-miR-134-3p	0.0873352	-4.08669	0.536481	0.592493
hsa-miR-1912-3p	0.0943445	-4.20304	0.542374	0.598512
hsa-miR-3922-5p	0.0766308	-3.96235	0.549562	0.60595
hsa-miR-7843-3p	-0.0586378	-3.41167	0.552077	0.608121
hsa-miR-18b-3p	-0.0150571	4.31587	0.552429	0.608121
hsa-miR-4741	-0.0685707	-3.66267	0.554239	0.609618
hsa-miR-3120-3p	-0.0339625	-1.69355	0.555088	0.610056
hsa-miR-27a-5p	-0.0390905	-2.26724	0.568027	0.62377
hsa-miR-7850-5p	0.0698312	-3.87925	0.569142	0.624488
hsa-miR-3661	-0.0288244	-1.56388	0.571161	0.626196
hsa-miR-184	0.0320258	-1.36158	0.572311	0.626949
hsa-miR-3196	-0.0358464	-1.2858	0.573722	0.627987
hsa-miR-4742-3p	-0.0206868	5.47244	0.575809	0.629762
hsa-miR-4738-5p	0.0670695	-3.8329	0.577473	0.631072
hsa-miR-5587-3p	0.0514357	-3.38492	0.583161	0.636775
hsa-miR-3613-3p	-0.022052	3.88522	0.584971	0.638236
hsa-miR-9901	0.058465	-3.68698	0.592768	0.646222
hsa-miR-6516-3p	-0.0774307	-4.10952	0.594413	0.647494
hsa-miR-6806-3p	-0.0204992	1.44195	0.59698	0.649575
hsa-miR-3184-5p	0.0728528	-4.03002	0.597283	0.649575
hsa-miR-7107-3p	0.0745	-4.00703	0.598585	0.650341
hsa-miR-6878-3p	0.0540032	-3.60617	0.598947	0.650341
hsa-miR-378f	-0.0291841	-2.28813	0.606246	0.657738
hsa-miR-6815-5p	0.0227199	-0.379609	0.620543	0.67271
hsa-miR-378b	-0.0558178	-3.90817	0.62125	0.672938
hsa-miR-122-5p	0.0357135	0.892592	0.628144	0.679862
hsa-miR-5089-3p	-0.062985	-3.98418	0.632429	0.683952
hsa-miR-1291	0.0391605	-2.98553	0.634833	0.686005
hsa-miR-3065-3p	-0.0619433	-4.05777	0.645035	0.696473
hsa-miR-29b-2-5p	0.0157004	4.36198	0.648027	0.699147
hsa-miR-760	0.0317546	-2.31887	0.652715	0.703643
hsa-miR-1290	-0.0659657	-3.95232	0.659941	0.710867
hsa-miR-4701-5p	0.0344086	-2.80336	0.666398	0.717252
hsa-miR-3529-5p	0.043431	-3.57011	0.671845	0.722541
hsa-miR-6845-5p	0.0559731	-4.08504	0.67759	0.727607
hsa-miR-654-3p	-0.0257288	2.35274	0.677843	0.727607
hsa-miR-6808-3p	-0.0219757	-1.06187	0.678168	0.727607
hsa-miR-6131	0.0231324	-1.74748	0.68291	0.732114
hsa-miR-6779-5p	0.0544889	-4.03458	0.690102	0.73894
hsa-miR-509-3p	0.0389495	-3.33124	0.690368	0.73894
hsa-miR-6802-5p	0.0543344	-4.01635	0.695259	0.743587
hsa-miR-6831-3p	-0.0577719	-4.16512	0.702876	0.750715
hsa-miR-4498	0.0355256	-3.25851	0.703033	0.750715
hsa-miR-200b-3p	0.0293852	-2.03822	0.704589	0.751783
hsa-miR-6813-3p	0.01798	-0.759696	0.705682	0.752357
hsa-miR-30c-2-3p	0.0452749	-3.46963	0.70711	0.753286
hsa-miR-1909-3p	-0.0497379	-4.01799	0.719932	0.766342
hsa-miR-3913-3p	0.0181165	-0.900722	0.722251	0.768208
hsa-miR-675-3p	-0.0554807	-4.2251	0.730192	0.776044
hsa-miR-6751-5p	0.0358441	-3.54713	0.733739	0.779202
hsa-miR-140-3p	-0.00873764	11.36	0.748232	0.793793
hsa-miR-1304-5p	-0.0104701	0.717351	0.748651	0.793793
hsa-miR-330-5p	0.0104975	2.37345	0.749617	0.794195
hsa-miR-3680-3p	-0.014013	-0.957115	0.753181	0.797347
hsa-miR-3133	-0.0123958	0.917458	0.755381	0.799051
hsa-miR-2355-3p	-0.0169311	-1.03689	0.756719	0.799842
hsa-miR-1296-5p	0.0141661	0.483812	0.759297	0.801941
hsa-miR-196a-1-3p	-0.0399305	-2.19739	0.762008	0.804177
hsa-miR-4323	-0.0218072	-2.60253	0.764745	0.806436
hsa-miR-4539	0.035234	-3.70616	0.765695	0.80681
hsa-miR-6790-3p	0.0168229	-2.15609	0.77723	0.818328
hsa-miR-5584-3p	-0.0334621	-3.79223	0.778732	0.819272
hsa-miR-3159	-0.0399339	-4.09703	0.783222	0.823356
hsa-miR-365b-3p	0.00753892	4.829	0.785774	0.825398
hsa-miR-365a-3p	0.00744991	4.82895	0.788244	0.827109
hsa-miR-615-3p	0.0293799	-3.522	0.788625	0.827109
hsa-miR-195-3p	0.0368717	-4.03925	0.790052	0.827477
hsa-miR-744-5p	0.00822174	5.26698	0.790197	0.827477
hsa-miR-874-3p	0.00951766	1.99261	0.806956	0.844373
hsa-miR-4638-5p	0.0223449	-3.43729	0.811689	0.84867
hsa-miR-4757-3p	-0.0184822	-3.03308	0.817553	0.854141
hsa-miR-6727-3p	0.0106076	-0.859726	0.823722	0.859923
hsa-miR-1261	0.0129018	-1.63212	0.828034	0.863758
hsa-miR-6836-5p	0.0121361	-2.05408	0.836426	0.871841
hsa-miR-7704	-0.00769591	0.777658	0.83764	0.872434
hsa-miR-758-5p	0.0255141	-3.94131	0.841579	0.875264
hsa-miR-3613-5p	-1.16178	0.621218	0.84165	0.875264
hsa-miR-542-5p	0.00810125	-0.320812	0.843494	0.876508
hsa-miR-10396b-5p	-0.024792	-3.85131	0.845844	0.878277
hsa-miR-4470	0.027489	-4.15734	0.852787	0.884227
hsa-miR-4289	0.0156031	-3.79811	0.85288	0.884227
hsa-miR-4676-3p	-0.00820371	-0.714476	0.85383	0.884534
hsa-miR-4733-5p	0.0246066	-4.00857	0.855829	0.885927
hsa-miR-6502-5p	-0.0188117	-3.58096	0.859327	0.888869
hsa-miR-28-3p	-0.00599449	4.63637	0.860811	0.889724
hsa-miR-3934-5p	-0.0122737	-2.17582	0.862443	0.890282
hsa-miR-146b-3p	0.00608827	0.726088	0.862666	0.890282
hsa-miR-3184-3p	-0.0250814	-3.98095	0.864355	0.891346
hsa-miR-1273h-3p	-0.00468268	1.52229	0.873442	0.900031
hsa-miR-4639-5p	-0.0232989	-4.16284	0.877731	0.903763
hsa-miR-152-5p	0.023425	-4.21257	0.887124	0.91274
hsa-miR-6735-3p	0.00715624	-1.40441	0.887831	0.912774
hsa-miR-362-5p	-0.00424029	5.89672	0.89384	0.918255
hsa-miR-216b-5p	-0.0178224	-3.92995	0.895869	0.919642
hsa-miR-4645-3p	-0.0085518	-2.54372	0.902126	0.925363
hsa-miR-214-3p	0.00981323	-0.937169	0.909594	0.932317
hsa-miR-940	-0.00630035	-1.5713	0.910691	0.932735
hsa-miR-92b-3p	0.00304923	9.97924	0.91399	0.935406
hsa-let-7e-5p	-0.00447729	5.62394	0.915555	0.935648
hsa-miR-1304-3p	0.00320888	4.19984	0.916017	0.935648
hsa-miR-619-5p	0.00558291	-1.31803	0.916299	0.935648
hsa-miR-3065-5p	0.00880309	-3.2127	0.917025	0.935683
hsa-miR-758-3p	-0.0081535	-2.51965	0.922517	0.940579
hsa-miR-6800-5p	0.0130508	-4.22045	0.928715	0.946185
hsa-let-7a-5p	0.00335143	12.9532	0.93514	0.952015
hsa-miR-329-5p	0.0103973	-4.06395	0.939367	0.9556
hsa-miR-10399-3p	-0.00236501	4.5898	0.943427	0.959009
hsa-miR-598-5p	-0.0101726	-4.09244	0.946918	0.961836
hsa-miR-3130-3p	-0.00454256	-2.59771	0.950134	0.964379
hsa-miR-4712-3p	-0.00789078	-3.94779	0.951105	0.964642
hsa-miR-4766-5p	0.00607362	-3.70247	0.953978	0.966831
hsa-miR-4444	0.0060478	-3.79598	0.958577	0.970765
hsa-miR-181a-2-3p	0.00121432	6.77238	0.959358	0.97083
hsa-miR-151b	0.0012117	8.21474	0.961518	0.97229
hsa-miR-4731-3p	0.00592237	-3.98135	0.963699	0.973768
hsa-miR-361-5p	0.00125092	7.22136	0.969007	0.9784
hsa-miR-652-3p	0.00077927	9.2273	0.972292	0.980694
hsa-miR-15b-5p	-0.00199159	10.4993	0.972726	0.980694
hsa-miR-4653-3p	-0.00357518	-3.66486	0.977544	0.984817
hsa-miR-145-5p	0.000792979	5.12386	0.979432	0.985986
hsa-miR-3913-5p	0.00116647	-0.695186	0.983561	0.989407
hsa-miR-6834-3p	-0.00164382	-3.22788	0.987299	0.99241
hsa-miR-6733-5p	0.00102998	-2.90346	0.988012	0.99241
hsa-miR-4786-5p	-0.000709704	-2.36303	0.991626	0.99508
hsa-miR-6854-3p	-0.00149474	-3.63806	0.992141	0.99508
hsa-miR-1185-2-3p	-0.00286762	-4.08562	0.996771	0.998984
hsa-miR-1234-3p	-4.67891e-05	1.36112	0.999005	0.999805
hsa-miR-3667-3p	7.339e-05	-0.209351	0.999236	0.999805
hsa-miR-4664-5p	-0.000341687	-3.38272	0.999805	0.999805

## Sheet: Mild Stage
ID	logFC	AveExpr	P.Value	adj.P.Val
hsa-miR-205-5p	3.26992	-1.38505	8.05858934956913e-83	1.09113299793166e-79
hsa-miR-203a-3p	2.19684	-3.02342	8.93343e-51	6.04793e-48
hsa-miR-200a-3p	1.18508	-3.89492	2.36531e-10	1.06755e-07
hsa-miR-4433a-5p	0.504357	2.13848	3.78165e-09	1.28009e-06
hsa-miR-9-5p	0.522151	-1.74606	2.057e-06	0.000557036
hsa-miR-183-5p	-0.42668	8.12605	2.50518e-06	0.000565335
hsa-miR-532-5p	-0.216766	7.73273	3.35239e-06	0.000648448
hsa-miR-6802-3p	0.155751	3.16335	4.1634e-06	0.000704655
hsa-miR-6805-3p	0.514096	-3.16727	1.0054e-05	0.00151257
hsa-miR-200b-3p	0.459929	-2.03822	1.52503e-05	0.00206489
hsa-miR-3127-5p	0.211502	0.405681	1.74666e-05	0.00214998
hsa-miR-3140-5p	-0.368824	-1.65521	2.58218e-05	0.00291356
hsa-miR-1180-3p	0.143097	7.19636	3.35931e-05	0.00349885
hsa-miR-6507-5p	0.920155	-3.7426	3.90373e-05	0.00377546
hsa-miR-375-3p	0.309471	-0.30131	5.37865e-05	0.00485513
hsa-miR-6729-3p	0.223156	1.52077	6.12268e-05	0.00518132
hsa-miR-6881-3p	0.173723	3.55797	6.5211e-05	0.00519387
hsa-miR-6749-3p	0.167399	4.73034	7.72453e-05	0.00559697
hsa-miR-1295a	0.903656	-3.81684	8.15178e-05	0.00559697
hsa-miR-451b	-0.283008	-0.405214	8.26731e-05	0.00559697
hsa-miR-548t-3p	-0.271999	1.89605	9.05529e-05	0.00583851
hsa-miR-548aa	-0.269248	1.91662	0.000103445	0.00636654
hsa-miR-1271-5p	-0.20144	2.48223	0.000111162	0.00654405
hsa-miR-624-3p	-0.586672	-3.22429	0.000141596	0.00798839
hsa-miR-376c-3p	-0.419067	-1.97992	0.000157275	0.00851803
hsa-miR-15a-3p	-0.631672	-3.70052	0.00017819	0.00923078
hsa-miR-496	-0.506923	-2.65237	0.00018407	0.00923078
hsa-miR-6786-3p	0.141836	2.34696	0.000217102	0.0104984
hsa-miR-10401-3p	0.159772	4.31646	0.000242574	0.0113257
hsa-miR-1229-3p	0.176462	3.68063	0.000260058	0.0117373
hsa-miR-10395-3p	0.509267	-3.21377	0.000342572	0.0149627
hsa-miR-30e-3p	-0.245186	5.75029	0.000365327	0.0154579
hsa-miR-6826-3p	0.446804	0.540795	0.000392696	0.0158689
hsa-miR-6750-5p	0.19972	-0.293953	0.000398482	0.0158689
hsa-miR-371b-5p	0.190596	-0.352542	0.000415214	0.0160629
hsa-miR-188-3p	-0.606601	-3.75965	0.000431183	0.0162173
hsa-miR-582-3p	-0.433238	-3.0172	0.000457199	0.016731
hsa-miR-6734-3p	0.14908	4.05696	0.000475969	0.0169595
hsa-miR-6511a-3p	0.168083	5.96246	0.000523333	0.0181691
hsa-miR-192-5p	-0.189186	8.79404	0.000577863	0.0195606
hsa-miR-6825-5p	-0.478779	-2.49285	0.000626978	0.0207056
hsa-miR-20b-3p	-0.293129	-1.19634	0.000684993	0.0220829
hsa-miR-324-3p	0.101758	7.21234	0.00079275	0.0245024
hsa-miR-548d-3p	-0.255936	-0.41519	0.000802598	0.0245024
hsa-miR-187-3p	0.674187	-4.14904	0.000814332	0.0245024
hsa-miR-106a-3p	-0.41009	-2.74317	0.000858031	0.0252559
hsa-miR-548aq-3p	-0.317185	-1.58312	0.000918755	0.0259516
hsa-miR-561-5p	-0.776336	-4.18108	0.00094345	0.0259516
hsa-miR-6803-3p	0.176742	7.09309	0.000965846	0.0259516
hsa-miR-1306-5p	0.16136	7.46111	0.000972983	0.0259516
hsa-miR-148a-3p	-0.260355	6.90018	0.000977498	0.0259516
hsa-miR-3160-3p	-0.448438	-3.35549	0.00106438	0.0274592
hsa-miR-409-5p	-0.334837	-1.68103	0.00107484	0.0274592
hsa-miR-548ar-3p	0.511864	-3.74447	0.00111212	0.0278853
hsa-miR-6845-3p	0.262041	-1.64723	0.00113548	0.0279534
hsa-miR-4497	-0.310779	-0.74369	0.00120247	0.029053
hsa-miR-1236-3p	0.159359	0.105467	0.00124099	0.029053
hsa-miR-6833-3p	0.116734	4.24418	0.00126257	0.029053
hsa-miR-4433b-5p	0.236099	6.31044	0.00126597	0.029053
hsa-miR-548at-5p	-0.301572	-0.346016	0.00132112	0.0298133
hsa-miR-6826-5p	0.36878	-2.56432	0.00137926	0.0306151
hsa-miR-1227-3p	0.131096	3.56301	0.00147003	0.0321035
hsa-miR-548bb-3p	-0.632669	-4.05371	0.00152851	0.0328509
hsa-miR-133a-3p	0.292407	1.79699	0.00162003	0.0339308
hsa-miR-4731-5p	0.187236	-0.319783	0.00167741	0.0339308
hsa-miR-656-3p	-0.425986	-2.95772	0.00168723	0.0339308
hsa-miR-328-3p	0.117496	8.46517	0.0017006	0.0339308
hsa-miR-215-5p	-0.208045	1.80113	0.00172923	0.0339308
hsa-miR-1302	0.566233	-3.97797	0.00175097	0.0339308
hsa-miR-382-3p	-0.344743	-1.45201	0.00175418	0.0339308
hsa-miR-6511b-3p	0.150402	5.63994	0.00178756	0.0340896
hsa-miR-182-5p	-0.224618	12.0085	0.00183731	0.0345516
hsa-miR-23a-5p	0.144833	0.827908	0.00189123	0.0347824
hsa-miR-5193	0.145925	0.657025	0.00190096	0.0347824
hsa-miR-3143	-0.270234	-0.216469	0.00196951	0.034932
hsa-miR-6511b-5p	0.155105	0.121934	0.00199265	0.034932
hsa-miR-4454	-0.135221	5.0208	0.00202273	0.034932
hsa-miR-20a-3p	-0.371398	-2.82012	0.00204352	0.034932
hsa-miR-6859-3p	0.123845	2.01577	0.00205705	0.034932
hsa-miR-154-3p	-0.839078	-4.26463	0.00206393	0.034932
hsa-miR-3173-5p	0.127715	6.46493	0.00219462	0.0364492
hsa-miR-1238-3p	0.166866	0.166895	0.00221077	0.0364492
hsa-miR-30c-1-3p	-0.148355	0.936971	0.00224667	0.0364492
hsa-miR-4677-5p	-0.287757	-2.0405	0.00226125	0.0364492
hsa-miR-641	-0.168789	2.24215	0.00233046	0.0367303
hsa-miR-6859-5p	0.136845	1.12858	0.00233294	0.0367303
hsa-miR-451a	-0.181433	17.2822	0.00240161	0.0370632
hsa-miR-6883-3p	0.150606	1.37033	0.00242004	0.0370632
hsa-miR-6741-3p	0.123877	3.16243	0.00244583	0.0370632
hsa-miR-509-3p	0.395789	-3.33124	0.00246358	0.0370632
hsa-miR-4677-3p	-0.182247	1.46222	0.00261889	0.0389668
hsa-miR-3912-3p	-0.663948	-4.11195	0.0026832	0.0394896
hsa-miR-193a-5p	0.141352	4.45524	0.00286949	0.0409864
hsa-miR-655-3p	-0.390621	-2.68761	0.00287025	0.0409864
hsa-miR-4301	0.17088	1.9051	0.0028757	0.0409864
hsa-miR-6810-5p	0.405389	-3.37439	0.00311633	0.0439532
hsa-miR-3138	0.199911	-0.448873	0.0031596	0.0441042
hsa-miR-486-3p	-0.365992	0.609105	0.00323189	0.0446528
hsa-miR-19b-3p	-0.2312	7.23016	0.00329977	0.0451302
hsa-miR-450b-5p	-0.378777	-1.93368	0.00350637	0.0474763
hsa-miR-6886-3p	0.292689	-2.21227	0.00357932	0.0479842
hsa-miR-4750-5p	0.414241	-3.53796	0.00361549	0.0479939
hsa-miR-376a-3p	-0.301783	-1.35925	0.00373181	0.049057
hsa-miR-6809-3p	0.296574	-2.4948	0.00417742	0.0543868
hsa-miR-29b-3p	-0.242154	3.89231	0.00436109	0.0562373
hsa-miR-3691-5p	0.13353	0.547827	0.00460987	0.0588846
hsa-miR-1233-3p	0.152299	-0.0603234	0.0046895	0.0593419
hsa-miR-6787-3p	0.207657	-1.52836	0.00500559	0.0622431
hsa-miR-7-1-3p	-0.171839	3.45928	0.0050107	0.0622431
hsa-miR-624-5p	-0.325233	-0.72294	0.00512038	0.0626868
hsa-miR-363-3p	-0.192199	8.59661	0.00515579	0.0626868
hsa-miR-545-5p	-0.327948	-2.40618	0.00518532	0.0626868
hsa-miR-148b-3p	-0.155149	7.03787	0.00533512	0.063927
hsa-miR-636	0.0979045	5.09078	0.00545952	0.0648438
hsa-miR-6748-3p	0.14423	0.19489	0.00555457	0.0649139
hsa-miR-374a-5p	-0.383881	1.34581	0.00556131	0.0649139
hsa-miR-6810-3p	0.195557	-0.921253	0.00576716	0.0667414
hsa-miR-6885-3p	0.101402	2.92485	0.00584772	0.0671002
hsa-miR-660-5p	-0.201109	4.33531	0.0059285	0.0674553
hsa-miR-362-3p	-0.285891	-0.125661	0.00644461	0.0727166
hsa-miR-6793-3p	0.109811	3.51817	0.00658675	0.0737063
hsa-miR-3074-3p	-0.247502	-2.01489	0.00666147	0.0739314
hsa-miR-6730-3p	0.156218	-0.0881248	0.00675251	0.0743326
hsa-miR-6890-3p	0.583954	-4.22048	0.0069337	0.0755349
hsa-miR-3617-5p	0.406682	-3.65635	0.00697331	0.0755349
hsa-miR-1304-3p	-0.115715	4.19984	0.00730693	0.0773913
hsa-miR-6825-3p	0.289958	-2.72397	0.00731556	0.0773913
hsa-miR-548e-3p	-0.200988	0.808321	0.00731616	0.0773913
hsa-miR-6772-3p	0.266857	-2.5709	0.00740331	0.0775536
hsa-miR-6866-3p	0.107464	0.974851	0.00744606	0.0775536
hsa-miR-411-3p	-0.318589	-1.93852	0.00764452	0.0790128
hsa-miR-7155-3p	0.111352	1.28249	0.00772275	0.0792167
hsa-miR-4646-3p	0.11158	4.64702	0.00832462	0.084701
hsa-miR-3940-5p	-0.631487	-4.11073	0.00838252	0.084701
hsa-miR-140-3p	-0.101406	11.36	0.00847742	0.0850254
hsa-miR-4669	0.421589	-0.713564	0.00869943	0.0852808
hsa-miR-379-5p	-0.331179	-2.79652	0.0087015	0.0852808
hsa-miR-5187-5p	0.237127	-1.99437	0.00874484	0.0852808
hsa-miR-3183	0.509333	-4.12515	0.00875483	0.0852808
hsa-miR-4722-3p	-0.500652	-3.89955	0.0092961	0.0899066
hsa-miR-1275	0.134449	1.56933	0.00970913	0.0932352
hsa-miR-548am-3p	-0.185211	-0.797987	0.0101173	0.096325
hsa-miR-24-2-5p	-0.186731	-0.943596	0.0102226	0.096325
hsa-miR-4787-3p	0.2766	-2.81638	0.0102443	0.096325
hsa-miR-15b-3p	-0.144134	7.61367	0.0104489	0.0975712
hsa-miR-6778-3p	0.308824	-3.15774	0.0107326	0.099534
hsa-miR-6783-3p	0.133519	2.48101	0.010853	0.0997892
hsa-miR-6741-5p	0.300608	-2.99881	0.0110932	0.0997892
hsa-miR-19a-3p	-0.271359	2.35204	0.0110991	0.0997892
hsa-miR-7975	-0.506149	-4.05349	0.0111413	0.0997892
hsa-miR-548o-3p	-0.14558	2.60758	0.0111639	0.0997892
hsa-miR-3064-3p	-0.208145	-1.15961	0.0112023	0.0997892
hsa-miR-1255b-2-3p	-0.276654	-2.05299	0.0113532	0.0998778
hsa-miR-6842-3p	0.109867	3.55459	0.0114083	0.0998778
hsa-let-7f-1-3p	-0.174127	2.21684	0.0114336	0.0998778
hsa-miR-4642	0.516692	-4.08597	0.0115533	0.100276
hsa-miR-3688-5p	-0.452877	-4.07078	0.0117211	0.100517
hsa-miR-495-3p	-0.223622	1.31752	0.0117295	0.100517
hsa-miR-1976	0.103975	7.46756	0.0118126	0.100593
hsa-miR-5004-3p	0.318263	-3.35885	0.0119031	0.100639
hsa-miR-6846-3p	-0.461729	-3.85304	0.0119667	0.100639
hsa-miR-570-3p	-0.286955	-2.40392	0.0122922	0.102739
hsa-miR-379-3p	-0.38215	-3.31092	0.0124763	0.103637
hsa-miR-6861-5p	0.369479	-3.56718	0.0126573	0.1045
hsa-miR-23b-3p	-0.103989	8.37365	0.0130138	0.106531
hsa-miR-503-5p	-0.133967	5.01765	0.0130607	0.106531
hsa-miR-6796-3p	0.330616	-3.11473	0.0135731	0.108898
hsa-miR-454-3p	-0.21853	4.48117	0.0135767	0.108898
hsa-miR-146a-3p	-0.374878	-2.76045	0.0135921	0.108898
hsa-miR-193b-3p	0.162318	-0.337526	0.0136747	0.108915
hsa-miR-4423-3p	-0.604349	-4.19964	0.013893	0.109513
hsa-miR-99a-5p	-0.146193	4.40625	0.0140364	0.109513
hsa-miR-7976	-0.115871	4.12226	0.0140451	0.109513
hsa-miR-374b-3p	-0.313885	-3.03617	0.0141424	0.109513
hsa-miR-548k	-0.274356	-1.17218	0.0141541	0.109513
hsa-miR-4796-5p	-0.31644	-3.20076	0.0142789	0.109851
hsa-miR-139-3p	0.173305	-0.600823	0.0147131	0.112551
hsa-miR-6840-5p	0.246624	-0.805831	0.0149245	0.113527
hsa-miR-487b-3p	-0.211805	0.931333	0.0152423	0.115013
hsa-miR-1185-1-3p	-0.418776	-3.71317	0.0152897	0.115013
hsa-miR-6819-3p	0.110068	1.00808	0.0154195	0.115348
hsa-miR-1307-5p	-0.152477	0.657391	0.0156242	0.116027
hsa-miR-3120-3p	-0.201827	-1.69355	0.0156816	0.116027
hsa-miR-548p	-0.172926	-0.817134	0.0161798	0.119039
hsa-miR-3605-3p	0.0929076	6.42385	0.0162645	0.119039
hsa-miR-98-3p	-0.25295	-0.863625	0.0169064	0.123071
hsa-miR-6895-3p	0.233376	-2.40331	0.0174333	0.125695
hsa-miR-758-3p	-0.280145	-2.51965	0.0174524	0.125695
hsa-miR-3688-3p	-0.124592	2.05184	0.0176073	0.126139
hsa-miR-140-5p	-0.213333	0.298238	0.0178644	0.126664
hsa-miR-539-5p	-0.304673	-2.93938	0.0179766	0.126664
hsa-miR-320b	0.109798	6.95752	0.0180425	0.126664
hsa-miR-532-3p	0.070491	8.41872	0.018074	0.126664
hsa-miR-421	-0.10957	5.00565	0.0181842	0.126664
hsa-miR-374c-5p	-0.260492	0.637801	0.0182548	0.126664
hsa-miR-627-3p	-0.130056	2.59002	0.018342	0.126664
hsa-miR-29c-3p	-0.205524	2.54152	0.0185177	0.126664
hsa-miR-4695-3p	0.136305	0.393805	0.0185225	0.126664
hsa-miR-484	0.063932	12.9432	0.0188275	0.128102
hsa-miR-548l	-0.263954	-1.40238	0.0190489	0.128961
hsa-miR-4751	0.458525	-4.02171	0.0191745	0.129093
hsa-miR-340-5p	-0.197206	2.79008	0.0192972	0.129093
hsa-miR-574-5p	0.174548	3.51391	0.0194338	0.129093
hsa-miR-3144-3p	0.413937	-3.89217	0.0194498	0.129093
hsa-miR-3174	-0.284388	-3.17742	0.0196724	0.129323
hsa-miR-6850-5p	0.19048	-1.77181	0.0197688	0.129323
hsa-miR-4723-5p	0.14452	-1.00477	0.0197709	0.129323
hsa-miR-582-5p	-0.273021	-2.388	0.0200133	0.130279
hsa-miR-369-5p	-0.364082	-3.49857	0.0202018	0.130877
hsa-miR-101-5p	-0.275208	-2.11666	0.0207247	0.133523
hsa-miR-502-5p	-0.123568	1.48527	0.0208075	0.133523
hsa-miR-3135a	-0.167685	-0.608633	0.0213251	0.135755
hsa-miR-15a-5p	-0.266714	5.93876	0.0213559	0.135755
hsa-miR-548av-3p	-0.152255	-0.178244	0.0217279	0.137475
hsa-miR-320e	0.13326	3.23885	0.0218988	0.137911
hsa-miR-4429	0.155585	-0.748176	0.0226601	0.141015
hsa-miR-6855-5p	0.141898	0.0610102	0.0228243	0.141015
hsa-miR-4723-3p	0.152986	-0.909522	0.022864	0.141015
hsa-miR-5695	-0.149279	1.72633	0.0228807	0.141015
hsa-miR-4444	-0.387356	-3.79598	0.0229123	0.141015
hsa-miR-7-2-3p	-0.327085	-3.49096	0.0232053	0.14202
hsa-miR-4647	0.283702	-3.16704	0.0233075	0.14202
hsa-miR-1285-3p	-0.0685866	4.82443	0.0233903	0.14202
hsa-miR-548ae-3p	-0.284116	-3.13655	0.0243527	0.146861
hsa-miR-142-5p	-0.172689	9.8938	0.0244256	0.146861
hsa-miR-200b-5p	0.292786	-3.22497	0.0245129	0.146861
hsa-miR-6812-3p	0.0963418	1.80171	0.0247195	0.147446
hsa-miR-210-5p	0.110784	3.01969	0.0250119	0.148521
hsa-miR-1-3p	0.315553	-3.12714	0.0252258	0.148521
hsa-miR-16-5p	-0.198256	9.97691	0.0252288	0.148521
hsa-miR-342-5p	0.0788729	4.67947	0.0257501	0.150934
hsa-miR-6884-5p	0.1476	-0.688963	0.0259938	0.151227
hsa-miR-491-3p	-0.21814	-2.28545	0.0260661	0.151227
hsa-miR-556-3p	-0.309241	-3.13318	0.0266021	0.151227
hsa-miR-10a-5p	-0.140194	5.74217	0.0267039	0.151227
hsa-miR-1289	-0.212279	-2.53131	0.0267425	0.151227
hsa-miR-374b-5p	-0.237468	5.40625	0.0267756	0.151227
hsa-miR-3064-5p	0.184276	-1.66821	0.0267902	0.151227
hsa-miR-4732-5p	0.103405	5.64955	0.0269863	0.151227
hsa-miR-3140-3p	-0.128162	0.620803	0.0270642	0.151227
hsa-miR-106a-5p	-0.159077	5.30617	0.0270713	0.151227
hsa-miR-26a-5p	-0.146101	12.0024	0.0270827	0.151227
hsa-miR-579-3p	-0.267556	-2.57217	0.0271404	0.151227
hsa-miR-520g-3p	0.576089	-4.17969	0.027333	0.151676
hsa-miR-4745-3p	0.112984	0.388123	0.0275407	0.152204
hsa-miR-106b-3p	-0.100405	9.41437	0.0277728	0.152863
hsa-miR-3960	-0.1619	4.71014	0.0279479	0.152974
hsa-miR-6511a-5p	0.185708	-1.97419	0.0281014	0.152974
hsa-miR-320c	0.114029	4.94231	0.0281319	0.152974
hsa-miR-548h-5p	-0.325109	-3.45024	0.028496	0.15398
hsa-miR-5582-3p	-0.215664	-1.55271	0.0285443	0.15398
hsa-miR-150-5p	0.0780801	11.1436	0.0287538	0.154081
hsa-miR-135a-2-3p	-0.332979	-3.69397	0.0287906	0.154081
hsa-miR-342-3p	0.0669202	8.32619	0.0292479	0.155912
hsa-miR-487a-3p	-0.257811	-2.29887	0.0295023	0.156527
hsa-miR-1306-3p	0.131537	2.30876	0.0295944	0.156527
hsa-miR-337-3p	-0.203374	1.40551	0.0304603	0.160479
hsa-miR-6743-3p	0.118176	1.7035	0.0308108	0.161697
hsa-miR-126-5p	-0.340547	3.34666	0.0310902	0.162533
hsa-miR-1299	-0.436951	1.98143	0.0314402	0.163731
hsa-miR-194-5p	-0.140381	5.45533	0.0317201	0.164555
hsa-miR-454-5p	-0.10489	5.64918	0.0321669	0.166236
hsa-miR-4467	-0.341177	-2.66581	0.0326081	0.167876
hsa-miR-25-3p	-0.11014	12.9223	0.0329454	0.167897
hsa-miR-548f-5p	-0.337577	-3.56189	0.032959	0.167897
hsa-miR-431-5p	-0.202224	-0.614681	0.0329843	0.167897
hsa-miR-4755-5p	0.0734657	2.80048	0.0331598	0.168159
hsa-miR-192-3p	-0.168962	-0.570886	0.0335238	0.169047
hsa-miR-4667-5p	0.156576	-1.38392	0.0335846	0.169047
hsa-miR-20b-5p	-0.162754	5.07394	0.034034	0.170674
hsa-miR-6865-3p	0.197687	-2.0928	0.0350657	0.175199
hsa-miR-4446-3p	0.151048	-0.519596	0.0353549	0.175727
hsa-miR-4746-5p	-0.130241	-0.46499	0.0354309	0.175727
hsa-miR-548bc	-0.252984	-2.87995	0.0359816	0.177807
hsa-miR-1268a	-0.301665	-1.65662	0.0363933	0.179187
hsa-miR-628-3p	-0.122679	2.86576	0.0370486	0.181753
hsa-miR-7114-3p	0.268325	-3.32782	0.0377178	0.184368
hsa-miR-1234-3p	0.10088	1.36112	0.0383005	0.186543
hsa-let-7a-3p	-0.180399	3.87113	0.0384486	0.186593
hsa-miR-5094	-0.133112	-0.0886374	0.0386969	0.186883
hsa-miR-5698	0.399247	-2.94609	0.0387845	0.186883
hsa-miR-3133	-0.116456	0.917458	0.0392634	0.18852
hsa-miR-877-3p	0.0916255	2.22346	0.0398286	0.190558
hsa-miR-6721-5p	0.105517	1.57544	0.0411752	0.196307
hsa-miR-33b-5p	-0.448094	-4.15312	0.0416706	0.197972
hsa-miR-9-3p	-0.194128	-1.8989	0.0419355	0.198534
hsa-miR-4732-3p	0.0742103	8.98195	0.0424887	0.200213
hsa-miR-4742-5p	-0.15895	-1.11574	0.0425859	0.200213
hsa-miR-6754-3p	0.111224	0.272103	0.0427881	0.200467
hsa-miR-6812-5p	-0.425587	-4.05201	0.0429366	0.20047
hsa-miR-128-3p	-0.0853675	9.83439	0.0434472	0.202156
hsa-miR-6887-3p	0.196524	-2.05273	0.0446339	0.206466
hsa-miR-136-3p	-0.322705	-3.67943	0.0447223	0.206466
hsa-miR-500a-3p	-0.0854964	6.77818	0.0449669	0.206466
hsa-miR-3684	-0.309364	-3.62013	0.0452435	0.206466
hsa-miR-6791-3p	0.0896864	0.572184	0.0452982	0.206466
hsa-miR-26b-5p	-0.19336	8.68246	0.0456011	0.206466
hsa-miR-3127-3p	0.0955509	1.63804	0.0456139	0.206466
hsa-miR-598-3p	-0.185484	-0.334177	0.0456654	0.206466
hsa-miR-548ar-5p	-0.309492	-3.52335	0.0457458	0.206466
hsa-miR-17-5p	-0.156682	6.86104	0.0459248	0.206585
hsa-miR-3690	0.22074	-1.55657	0.0462933	0.207554
hsa-miR-6764-3p	0.182605	-2.3061	0.0464709	0.207662
hsa-miR-3150a-5p	0.0793563	1.03807	0.0468705	0.208759
hsa-miR-671-5p	0.0931174	0.489075	0.0473892	0.210377
hsa-miR-3187-3p	0.0890584	1.98152	0.0477256	0.211178
hsa-miR-6732-3p	0.137746	-1.24244	0.0486908	0.214747
hsa-miR-654-3p	-0.173018	2.35274	0.0490464	0.214923
hsa-miR-181b-2-3p	-0.240459	-2.99385	0.0492953	0.214923
hsa-miR-301a-5p	-0.176575	-1.85904	0.0493358	0.214923
hsa-miR-26a-2-3p	-0.181947	-0.0681558	0.0494148	0.214923
hsa-miR-3922-5p	-0.382108	-3.96235	0.0496291	0.214923
hsa-miR-501-3p	-0.0643318	7.49509	0.0498989	0.214923
hsa-miR-4637	-0.215514	-2.35291	0.0500041	0.214923
hsa-miR-7107-3p	-0.429039	-4.00703	0.0500043	0.214923
hsa-miR-548g-5p	-0.300549	-3.50163	0.0502095	0.214923
hsa-miR-513a-5p	-0.471399	-4.13956	0.0503259	0.214923
hsa-miR-361-3p	0.0624162	7.99713	0.0504767	0.214923
hsa-miR-6780b-3p	0.100076	-0.126858	0.0511424	0.217075
hsa-miR-5192	0.368854	-3.99894	0.0514914	0.217604
hsa-miR-4659b-5p	-0.148109	-0.433102	0.0516281	0.217604
hsa-miR-23a-3p	-0.0754624	10.2684	0.051876	0.217604
hsa-miR-652-5p	-0.208196	-2.10462	0.0519101	0.217604
hsa-miR-548ah-3p	-0.133238	-0.546929	0.0523299	0.218687
hsa-miR-548j-5p	-0.19277	-0.780523	0.0534974	0.222554
hsa-miR-548x-5p	-0.29652	-3.5048	0.0535838	0.222554
hsa-miR-6752-3p	0.161175	-1.87414	0.0542438	0.224606
hsa-miR-548aj-5p	-0.294808	-3.5016	0.0544699	0.224855
hsa-miR-6854-3p	-0.303131	-3.63806	0.0548821	0.225867
hsa-miR-6832-3p	0.135251	-1.53865	0.0553767	0.227088
hsa-miR-939-5p	0.103172	1.60226	0.0556874	0.227088
hsa-miR-4750-3p	0.298953	-3.82064	0.0559316	0.227088
hsa-miR-3180-5p	0.144275	-1.01496	0.0559974	0.227088
hsa-miR-3128	-0.144534	-0.690868	0.0560174	0.227088
hsa-miR-7848-3p	0.147237	-1.51379	0.0567542	0.228853
hsa-miR-10398-3p	0.262818	-3.3812	0.0569073	0.228853
hsa-miR-320a-3p	0.0895905	12.5805	0.0569596	0.228853
hsa-miR-4999-5p	-0.32784	-3.81196	0.0575267	0.229413
hsa-miR-4687-3p	0.358156	-3.97686	0.0576464	0.229413
hsa-miR-146b-5p	-0.114579	4.58356	0.0577663	0.229413
hsa-miR-128-1-5p	-0.142695	-1.75882	0.0577769	0.229413
hsa-miR-744-3p	-0.109399	0.517317	0.0581279	0.230132
hsa-miR-548b-3p	-0.365259	-3.83609	0.058466	0.230796
hsa-miR-625-5p	-0.0931797	2.39736	0.0588671	0.231703
hsa-miR-202-3p	0.17638	-1.54775	0.0591985	0.232333
hsa-miR-6776-3p	0.24516	-3.29794	0.059998	0.23479
hsa-miR-6514-5p	0.0801886	0.295119	0.0603912	0.235647
hsa-miR-377-5p	-0.219839	-2.5284	0.0610242	0.237433
hsa-miR-30e-5p	-0.130716	7.50798	0.061301	0.237827
hsa-miR-6733-5p	-0.206581	-2.90346	0.0617842	0.239017
hsa-miR-6726-3p	0.0958967	4.58676	0.0627215	0.241951
hsa-miR-1908-5p	0.10605	3.16537	0.0632905	0.243453
hsa-miR-21-5p	-0.196765	7.32673	0.0635984	0.243944
hsa-miR-6750-3p	0.0856133	1.49433	0.0639541	0.244514
hsa-miR-10399-5p	-0.170756	-0.602409	0.0641082	0.244514
hsa-miR-30d-3p	-0.174111	-1.78436	0.0644386	0.245084
hsa-miR-580-5p	-0.411064	-4.18087	0.064692	0.245358
hsa-miR-6746-3p	0.220582	-3.05567	0.0650541	0.246043
hsa-miR-1270	0.106533	3.32138	0.065491	0.2467
hsa-miR-3200-5p	0.0798974	5.80373	0.0655922	0.2467
hsa-miR-125b-2-3p	-0.257633	-3.41903	0.0661949	0.248277
hsa-miR-6882-3p	0.109796	0.809668	0.0665009	0.248735
hsa-miR-3155a	0.344082	-4.10445	0.0675025	0.251786
hsa-miR-144-5p	-0.263316	6.42086	0.0678749	0.25248
hsa-miR-6802-5p	0.343343	-4.01635	0.068134	0.252749
hsa-miR-1273h-3p	0.0749304	1.52229	0.0686863	0.254102
hsa-miR-32-3p	-0.228752	-2.26694	0.0697072	0.257176
hsa-miR-362-5p	-0.0812256	5.89672	0.0703521	0.25885
hsa-miR-1287-3p	-0.254145	-3.41809	0.071853	0.262459
hsa-miR-98-5p	-0.138661	4.88718	0.0719812	0.262459
hsa-miR-548ay-3p	-0.103265	1.44579	0.0721137	0.262459
hsa-miR-7110-3p	0.12516	-0.242958	0.0721498	0.262459
hsa-let-7f-5p	-0.132434	10.7931	0.0724767	0.262459
hsa-miR-3173-3p	0.176171	-2.38519	0.0724961	0.262459
hsa-miR-3944-3p	0.143347	-1.84731	0.073033	0.263698
hsa-miR-10392-5p	0.285912	-3.6736	0.0734029	0.264329
hsa-miR-6781-3p	-0.233881	-3.25173	0.0744453	0.267371
hsa-miR-10398-5p	-0.216907	-3.01131	0.0747813	0.267867
hsa-miR-500b-5p	-0.0611567	5.24287	0.0754191	0.268612
hsa-miR-106b-5p	-0.13754	8.20481	0.0756333	0.268612
hsa-miR-3675-5p	0.226006	-2.79222	0.0757596	0.268612
hsa-miR-500a-5p	-0.0604936	5.34391	0.0757828	0.268612
hsa-miR-4668-3p	-0.236372	-3.40337	0.0773327	0.27195
hsa-miR-1278	-0.404208	-4.18113	0.0774163	0.27195
hsa-miR-412-5p	-0.325829	-3.79695	0.0778585	0.27195
hsa-miR-365b-5p	0.152294	-1.96716	0.0779024	0.27195
hsa-miR-3615	0.0656441	9.96726	0.0779212	0.27195
hsa-miR-197-5p	0.148131	-1.34281	0.077968	0.27195
hsa-miR-221-5p	-0.14165	-0.23049	0.0781303	0.27195
hsa-miR-185-3p	0.0700504	4.51298	0.0790245	0.274357
hsa-miR-1281	0.391812	-4.20798	0.0800423	0.27718
hsa-miR-423-5p	0.0665998	12.7025	0.0807047	0.278761
hsa-miR-320d	0.087778	3.56514	0.0810621	0.279214
hsa-miR-6798-3p	0.0881066	1.55071	0.0812483	0.279214
hsa-miR-147b-5p	-0.267159	-3.70203	0.082057	0.281279
hsa-miR-1303	-0.10439	3.12659	0.082717	0.282825
hsa-miR-1224-3p	0.12809	0.353035	0.0832398	0.283896
hsa-let-7f-2-3p	-0.197833	-2.39941	0.083669	0.284643
hsa-miR-4687-5p	0.101471	-0.0735835	0.0842771	0.285414
hsa-miR-548ac	-0.138239	-1.17815	0.0843172	0.285414
hsa-miR-6880-3p	0.21396	-3.15829	0.0858194	0.289573
hsa-miR-5684	-0.14708	-2.23183	0.0859736	0.289573
hsa-miR-30b-5p	-0.0954514	9.0043	0.087481	0.293919
hsa-miR-5010-5p	0.118197	1.92493	0.0887374	0.297402
hsa-miR-5003-5p	-0.334006	-4.09006	0.0891792	0.298145
hsa-miR-130a-5p	-0.12768	-0.273034	0.0896465	0.298969
hsa-miR-3605-5p	0.0993318	0.18628	0.0910703	0.302971
hsa-miR-4757-3p	-0.196576	-3.03308	0.0919945	0.305295
hsa-miR-1237-3p	0.101192	-0.548706	0.0926205	0.306621
hsa-miR-6836-3p	0.0849034	0.764879	0.0929262	0.306883
hsa-miR-196b-5p	-0.154241	1.468	0.0935818	0.308296
hsa-miR-550b-3p	-0.0952153	1.3647	0.0939963	0.30891
hsa-miR-885-5p	0.118949	-0.566475	0.0948738	0.311039
hsa-miR-130a-3p	-0.10173	3.90132	0.0961709	0.31453
hsa-miR-30a-3p	-0.156136	-0.126916	0.0977487	0.31892
hsa-miR-450a-5p	-0.161206	0.432884	0.0989108	0.321181
hsa-miR-10a-3p	-0.240837	-3.48357	0.0989162	0.321181
hsa-miR-550a-3p	-0.0758992	6.96759	0.0992279	0.321423
hsa-miR-374a-3p	-0.24451	-2.78543	0.100268	0.324017
hsa-miR-4286	0.0626769	5.00873	0.101263	0.325379
hsa-miR-4745-5p	0.184813	-2.7241	0.101372	0.325379
hsa-miR-6881-5p	0.301966	-3.95748	0.101629	0.325379
hsa-miR-4646-5p	0.125006	-0.733936	0.101651	0.325379
hsa-miR-4804-3p	0.10523	1.13716	0.102916	0.328127
hsa-miR-6798-5p	0.371371	-4.20581	0.102995	0.328127
hsa-miR-4466	0.229931	-3.31853	0.103494	0.328127
hsa-miR-3065-5p	-0.203353	-3.2127	0.103665	0.328127
hsa-miR-1321	0.30892	-3.87888	0.103721	0.328127
hsa-miR-146a-5p	0.0756085	5.42472	0.104653	0.330302
hsa-miR-4690-3p	-0.141918	-1.85512	0.105469	0.330462
hsa-miR-101-3p	-0.201849	5.87373	0.105831	0.330462
hsa-miR-1273h-5p	0.112545	-1.23901	0.105832	0.330462
hsa-miR-762	-0.40497	-4.27502	0.105861	0.330462
hsa-miR-1290	0.306138	-3.95232	0.106025	0.330462
hsa-miR-877-5p	0.0842178	2.06313	0.106393	0.330462
hsa-miR-152-5p	-0.392249	-4.21257	0.106412	0.330462
hsa-miR-548aj-3p	-0.280624	-3.89289	0.108086	0.334894
hsa-miR-204-5p	0.155816	0.346873	0.108815	0.336381
hsa-miR-190b-5p	0.131436	-0.11313	0.109982	0.339217
hsa-miR-6755-3p	-0.13627	-1.86441	0.110547	0.340182
hsa-miR-194-3p	-0.0870735	0.0598995	0.111036	0.340912
hsa-miR-20a-5p	-0.161108	5.86625	0.111809	0.342511
hsa-miR-103a-3p	-0.0884056	10.9525	0.114094	0.348721
hsa-miR-4738-3p	0.0695517	0.552083	0.114914	0.350435
hsa-miR-6727-5p	0.290237	-4.01184	0.11609	0.353227
hsa-miR-3620-3p	0.0693764	3.6337	0.117287	0.356069
hsa-miR-4728-3p	0.0851257	0.428383	0.118165	0.357931
hsa-miR-548ak	-0.203687	-2.80611	0.120138	0.362459
hsa-miR-381-3p	-0.193742	-2.66654	0.120195	0.362459
hsa-miR-3146	-0.157425	-2.67488	0.121447	0.365422
hsa-miR-195-3p	0.296389	-4.03925	0.122108	0.365781
hsa-miR-4449	0.166168	-2.79218	0.122238	0.365781
hsa-miR-502-3p	-0.0603531	7.12837	0.122377	0.365781
hsa-miR-1294	0.0777185	3.72417	0.12289	0.366303
hsa-miR-937-3p	0.0716669	2.14631	0.123093	0.366303
hsa-miR-6815-5p	0.0984976	-0.379609	0.123542	0.366396
hsa-miR-6804-5p	0.0982286	-0.699769	0.123665	0.366396
hsa-miR-589-3p	-0.0699846	1.75091	0.12426	0.367354
hsa-miR-548t-5p	0.204686	-3.41653	0.125142	0.369131
hsa-miR-3199	-0.0990554	-1.05013	0.125406	0.369131
hsa-miR-15b-5p	-0.126496	10.4993	0.125981	0.369569
hsa-miR-296-3p	0.157712	-2.52241	0.126247	0.369569
hsa-miR-6726-5p	0.282183	-3.98834	0.126374	0.369569
hsa-miR-181c-5p	-0.106353	-0.159066	0.127273	0.371011
hsa-miR-29a-3p	-0.0784168	5.12223	0.12749	0.371011
hsa-miR-199b-3p	0.185964	1.06535	0.127689	0.371011
hsa-miR-126-3p	-0.175326	5.1027	0.128488	0.372532
hsa-miR-3065-3p	-0.304453	-4.05777	0.130193	0.375923
hsa-miR-6878-3p	-0.231102	-3.60617	0.130213	0.375923
hsa-miR-494-3p	-0.127232	2.0916	0.130839	0.37688
hsa-miR-199a-3p	0.183966	1.07048	0.131448	0.37688
hsa-miR-340-3p	-0.0846542	5.75232	0.13152	0.37688
hsa-miR-4758-3p	0.132788	-1.32702	0.131852	0.37688
hsa-miR-10399-3p	-0.0711453	4.5898	0.131936	0.37688
hsa-miR-369-3p	-0.218161	-2.81165	0.132296	0.377114
hsa-miR-7113-3p	0.089635	-0.301478	0.132775	0.377684
hsa-miR-3942-5p	-0.250082	-3.79077	0.134018	0.379561
hsa-miR-3157-5p	-0.0778886	0.578449	0.134034	0.379561
hsa-miR-4762-5p	-0.0919519	-0.309268	0.134422	0.379561
hsa-miR-1307-3p	-0.0871942	6.00136	0.134628	0.379561
hsa-miR-548n	-0.310783	-4.14963	0.134836	0.379561
hsa-miR-197-3p	0.0566035	8.1144	0.135258	0.379911
hsa-miR-548e-5p	-0.150389	-2.6001	0.135522	0.379911
hsa-miR-548ab	-0.189985	-1.49063	0.13665	0.38228
hsa-miR-605-5p	0.13876	-1.75037	0.137044	0.382593
hsa-miR-6804-3p	0.0838788	-0.261959	0.137376	0.382732
hsa-miR-7855-5p	0.0802897	0.361464	0.138118	0.383395
hsa-miR-218-5p	-0.333059	-0.499069	0.138181	0.383395
hsa-miR-3117-3p	-0.175623	-2.58501	0.139243	0.385552
hsa-miR-6793-5p	0.176034	-3.05927	0.139541	0.385589
hsa-miR-548c-3p	-0.156238	-2.7052	0.140066	0.386252
hsa-miR-4749-3p	0.0893463	-0.0687639	0.14104	0.388147
hsa-miR-17-3p	-0.0790757	3.9461	0.14195	0.389858
hsa-miR-3122	0.149838	-2.73608	0.143068	0.392133
hsa-miR-8485	-0.127691	-1.25241	0.143641	0.392909
hsa-miR-942-3p	-0.065817	1.81794	0.144041	0.393207
hsa-miR-4709-5p	0.253631	-3.94336	0.144368	0.39331
hsa-miR-5089-3p	0.26147	-3.98418	0.14472	0.393474
hsa-miR-195-5p	-0.128012	-0.862069	0.149724	0.404714
hsa-let-7g-5p	-0.109629	9.71128	0.149783	0.404714
hsa-miR-6781-5p	0.196102	-3.43119	0.149972	0.404714
hsa-miR-548c-5p	-0.180999	-1.66168	0.150179	0.404714
hsa-miR-6767-3p	0.147596	-2.66466	0.150348	0.404714
hsa-miR-6775-3p	0.0685291	0.902855	0.151023	0.405726
hsa-miR-6777-3p	0.0672667	3.54858	0.151484	0.4061
hsa-miR-5701	-0.26411	-3.41541	0.151763	0.4061
hsa-miR-33a-3p	-0.194883	-3.33618	0.15242	0.407056
hsa-miR-5584-5p	0.122334	-1.63917	0.153414	0.4081
hsa-miR-299-5p	-0.162891	-2.18878	0.153414	0.4081
hsa-miR-548o-5p	-0.17925	-1.66142	0.154022	0.408914
hsa-miR-550a-5p	-0.0454461	5.42109	0.154672	0.40941
hsa-miR-329-3p	-0.120539	2.74661	0.154814	0.40941
hsa-miR-23c	-0.0910444	-0.154252	0.155547	0.410245
hsa-miR-4743-3p	0.215229	-3.65211	0.156064	0.410245
hsa-miR-6876-3p	0.17821	-3.26469	0.156472	0.410245
hsa-miR-6820-3p	0.0524611	1.55349	0.156691	0.410245
hsa-miR-6516-5p	-0.124379	-1.74659	0.15694	0.410245
hsa-miR-548am-5p	-0.180082	-1.7222	0.157581	0.410245
hsa-miR-6894-3p	0.0595925	2.93558	0.157638	0.410245
hsa-miR-4714-3p	-0.0789007	-0.358106	0.157715	0.410245
hsa-miR-145-5p	0.0608178	5.12386	0.158233	0.410245
hsa-miR-3192-3p	0.131325	-2.26893	0.15846	0.410245
hsa-miR-3137	0.214049	-3.75964	0.158715	0.410245
hsa-miR-6817-3p	0.0726244	1.16605	0.158766	0.410245
hsa-miR-27b-3p	-0.110367	3.99717	0.16027	0.411784
hsa-miR-3614-3p	-0.323483	-4.21026	0.160392	0.411784
hsa-miR-424-5p	-0.16536	-0.220736	0.160424	0.411784
hsa-miR-26b-3p	-0.0699075	4.96474	0.160578	0.411784
hsa-miR-7109-3p	0.076088	-0.257392	0.160891	0.411808
hsa-miR-4725-3p	0.21996	-3.66159	0.162634	0.415485
hsa-miR-5004-5p	0.216805	-3.69166	0.163456	0.416797
hsa-miR-6735-5p	0.0604526	1.59137	0.164013	0.416823
hsa-miR-4306	-0.0677969	1.26181	0.164383	0.416823
hsa-miR-150-3p	0.0576504	1.62585	0.164692	0.416823
hsa-miR-7113-5p	0.0857719	-0.718399	0.164697	0.416823
hsa-miR-335-5p	-0.105326	2.5741	0.165573	0.417115
hsa-miR-891a-5p	0.192731	-3.40766	0.165612	0.417115
hsa-let-7b-3p	-0.0502119	6.20324	0.165963	0.417115
hsa-miR-376a-5p	0.245948	-3.90943	0.166045	0.417115
hsa-miR-142-3p	-0.137668	4.88268	0.168853	0.422851
hsa-miR-6759-3p	0.262311	-4.05597	0.168953	0.422851
hsa-miR-6762-3p	0.0790193	-0.155308	0.169393	0.423169
hsa-miR-3617-3p	0.153984	-2.72232	0.171246	0.427011
hsa-miR-33b-3p	-0.130926	-2.34349	0.171954	0.427989
hsa-miR-4473	-0.0771718	1.38116	0.172602	0.428812
hsa-miR-3679-5p	0.143853	-2.58239	0.173509	0.43011
hsa-miR-1291	-0.167424	-2.98553	0.173759	0.43011
hsa-miR-8072	0.266811	-3.98457	0.175214	0.43218
hsa-miR-6768-5p	0.167605	-3.21308	0.175234	0.43218
hsa-miR-6780a-5p	0.0883904	0.296232	0.175864	0.432944
hsa-miR-130b-3p	-0.0520722	5.71272	0.177952	0.43729
hsa-miR-4657	-0.141204	-2.56778	0.178675	0.437539
hsa-miR-548az-5p	-0.15286	-1.01298	0.17891	0.437539
hsa-miR-6771-3p	0.164693	-3.09651	0.179023	0.437539
hsa-miR-4775	-0.182098	-3.29559	0.180209	0.439645
hsa-miR-4800-3p	-0.201654	-3.66054	0.180738	0.440143
hsa-miR-28-3p	0.064043	4.63637	0.18184	0.442031
hsa-miR-3202	0.0837555	-1.06725	0.18261	0.443108
hsa-miR-129-1-3p	0.103517	-1.30047	0.183192	0.443724
hsa-miR-497-5p	0.217614	-3.82996	0.184062	0.445035
hsa-miR-324-5p	0.0423679	7.28812	0.185805	0.448449
hsa-let-7b-5p	0.0928986	12.0479	0.186748	0.449924
hsa-miR-5100	-0.0662463	5.28758	0.189108	0.454294
hsa-miR-3683	-0.295856	-4.20412	0.18945	0.454294
hsa-miR-615-3p	0.20316	-3.522	0.189569	0.454294
hsa-miR-181c-3p	-0.0947492	-1.00647	0.19258	0.459499
hsa-miR-92b-3p	-0.052054	9.97924	0.192717	0.459499
hsa-miR-6855-3p	0.0583074	0.70377	0.192889	0.459499
hsa-miR-6877-5p	0.069844	0.328081	0.193098	0.459499
hsa-miR-6508-3p	-0.126661	-2.52465	0.19443	0.461665
hsa-miR-6742-5p	-0.179023	-3.47704	0.19469	0.461665
hsa-miR-3150b-3p	0.107083	-1.73355	0.195629	0.463079
hsa-miR-873-5p	0.208174	-3.73549	0.196099	0.463273
hsa-miR-10400-5p	-0.111947	-1.20621	0.196395	0.463273
hsa-miR-378a-3p	-0.0578927	7.53756	0.198326	0.467015
hsa-miR-5196-3p	0.126615	-2.29349	0.200355	0.470765
hsa-miR-151a-5p	-0.0433952	10.5159	0.200614	0.470765
hsa-miR-3913-3p	-0.0931824	-0.900722	0.201869	0.472036
hsa-miR-3934-5p	-0.128597	-2.17582	0.202457	0.472036
hsa-miR-7846-3p	0.245566	-4.09145	0.202653	0.472036
hsa-miR-616-5p	-0.0539848	2.87943	0.202724	0.472036
hsa-miR-4685-5p	0.26249	-3.99061	0.203212	0.472036
hsa-miR-6876-5p	-0.150523	-3.00063	0.203247	0.472036
hsa-miR-3198	0.129602	-2.67319	0.203599	0.472042
hsa-miR-3680-5p	-0.172833	-3.46937	0.207104	0.478813
hsa-miR-3130-3p	-0.129645	-2.59771	0.207226	0.478813
hsa-miR-548ai	-0.272179	-4.15537	0.208147	0.479532
hsa-miR-508-5p	0.219565	-3.93943	0.208305	0.479532
hsa-miR-570-5p	-0.271856	-4.15515	0.2086	0.479532
hsa-miR-1468-5p	0.0611682	2.38069	0.208958	0.47954
hsa-miR-6742-3p	-0.224926	-3.93408	0.210312	0.481831
hsa-miR-21-3p	-0.103707	-1.6372	0.213455	0.488207
hsa-miR-766-3p	0.0447575	4.00227	0.214594	0.489224
hsa-miR-6843-3p	0.129015	-2.70519	0.214623	0.489224
hsa-miR-4725-5p	0.265494	-4.1567	0.215616	0.490662
hsa-miR-6766-3p	0.0575902	0.778617	0.218474	0.494902
hsa-miR-4655-5p	0.114313	-2.16954	0.218478	0.494902
hsa-miR-216b-5p	0.218286	-3.92995	0.218575	0.494902
hsa-miR-370-3p	-0.117405	-0.94566	0.219734	0.496302
hsa-miR-520h	0.340745	-4.24042	0.219927	0.496302
hsa-miR-6730-5p	0.16619	-3.15247	0.220468	0.496388
hsa-miR-1538	0.055249	1.17189	0.220698	0.496388
hsa-miR-6514-3p	0.0475889	1.98693	0.221926	0.498322
hsa-miR-6858-3p	0.129834	-2.38771	0.222852	0.499573
hsa-miR-1843	0.0497273	2.7827	0.223272	0.499686
hsa-miR-29a-5p	-0.140072	-3.10567	0.224343	0.501124
hsa-miR-9901	0.184844	-3.68698	0.224655	0.501124
hsa-miR-219b-5p	-0.0697719	-0.202985	0.225044	0.501168
hsa-miR-548j-3p	-0.231024	-4.02125	0.226027	0.502529
hsa-miR-193a-3p	-0.12422	-2.27574	0.226443	0.502629
hsa-miR-6873-5p	0.123793	-2.45872	0.229008	0.506623
hsa-miR-191-3p	0.0411559	1.41363	0.229083	0.506623
hsa-miR-4443	-0.0822334	2.99517	0.229731	0.506623
hsa-miR-517a-3p	0.229716	-3.08988	0.230679	0.506623
hsa-miR-517b-3p	0.229716	-3.08988	0.230679	0.506623
hsa-miR-6796-5p	-0.219795	-3.70794	0.23071	0.506623
hsa-miR-132-5p	-0.0707497	-0.00983856	0.231024	0.506623
hsa-miR-4695-5p	-0.241353	-3.95587	0.231236	0.506623
hsa-miR-627-5p	-0.105747	-1.74519	0.233554	0.510833
hsa-miR-1185-2-3p	-0.248495	-4.08562	0.233912	0.510833
hsa-let-7e-5p	-0.0707057	5.62394	0.235153	0.512718
hsa-miR-6503-3p	-0.0978288	-2.02681	0.236178	0.514125
hsa-miR-548au-5p	-0.144612	-0.739753	0.236964	0.514501
hsa-miR-3161	0.207703	-3.50216	0.237208	0.514501
hsa-miR-34a-5p	0.137995	-1.37299	0.237742	0.514501
hsa-miR-2116-3p	-0.120414	-2.42951	0.237871	0.514501
hsa-miR-11400	-0.108341	-1.13987	0.239014	0.514905
hsa-miR-548a-3p	-0.142867	-3.10666	0.239191	0.514905
hsa-miR-6735-3p	0.0834413	-1.40441	0.239652	0.514905
hsa-miR-1827	-0.14746	-3.65462	0.239985	0.514905
hsa-miR-548s	-0.159753	-3.39362	0.241647	0.514905
hsa-miR-378e	-0.208657	-4.1073	0.242044	0.514905
hsa-miR-3922-3p	-0.178295	-3.56798	0.242289	0.514905
hsa-miR-125a-5p	0.0497427	7.76939	0.242478	0.514905
hsa-miR-4326	0.139637	5.29274	0.24259	0.514905
hsa-miR-18b-5p	-0.129076	-1.22211	0.242596	0.514905
hsa-miR-6734-5p	0.0822441	1.51449	0.242765	0.514905
hsa-miR-2110	0.0487044	6.27812	0.242876	0.514905
hsa-miR-4289	-0.154754	-3.79811	0.243002	0.514905
hsa-miR-1323	0.283808	-4.05656	0.243858	0.515911
hsa-miR-34b-3p	0.125804	-2.71315	0.244611	0.516636
hsa-miR-548d-5p	-0.147713	-0.0270945	0.244964	0.516636
hsa-miR-3160-5p	-0.162092	-3.47413	0.245989	0.51699
hsa-miR-548ap-5p	0.208515	-3.95243	0.246423	0.51699
hsa-miR-6889-3p	0.0692365	-0.746989	0.246909	0.51699
hsa-miR-188-5p	-0.0697686	-0.0430127	0.246917	0.51699
hsa-miR-214-3p	0.138852	-0.937169	0.247553	0.51699
hsa-miR-4772-5p	-0.130172	-2.56971	0.247853	0.51699
hsa-miR-202-5p	-0.134799	-0.847273	0.248049	0.51699
hsa-miR-7977	0.037643	3.77755	0.24848	0.51699
hsa-miR-4639-3p	0.0926692	-1.89127	0.248739	0.51699
hsa-miR-6866-5p	0.0670511	-0.722077	0.248949	0.51699
hsa-miR-422a	-0.0872087	-2.26376	0.249948	0.517839
hsa-miR-4672	-0.065521	0.64713	0.250123	0.517839
hsa-miR-1287-5p	-0.0897146	1.32104	0.256689	0.529316
hsa-miR-6782-3p	-0.0461975	0.738785	0.256703	0.529316
hsa-miR-6891-3p	-0.270493	-4.20898	0.257232	0.529316
hsa-miR-3196	-0.102074	-1.2858	0.257347	0.529316
hsa-miR-548ay-5p	-0.142474	0.0371806	0.257855	0.529316
hsa-miR-6516-3p	-0.240072	-4.10952	0.258375	0.529316
hsa-miR-6509-3p	-0.0461363	1.88703	0.258403	0.529316
hsa-miR-32-5p	-0.258859	-1.69932	0.259638	0.530291
hsa-miR-185-5p	-0.0403581	11.5901	0.259663	0.530291
hsa-miR-2355-5p	-0.196246	-3.82662	0.260237	0.530663
hsa-miR-190a-5p	-0.1349	0.826915	0.26074	0.53089
hsa-miR-2276-3p	-0.0787874	-0.990625	0.261781	0.530922
hsa-miR-6836-5p	0.0925039	-2.05408	0.262094	0.530922
hsa-miR-6815-3p	0.0670632	-0.760016	0.262498	0.530922
hsa-miR-23b-5p	0.0641988	-0.575854	0.263308	0.530922
hsa-miR-301a-3p	-0.138896	-2.01819	0.263485	0.530922
hsa-miR-3136-5p	-0.114006	-2.59352	0.264272	0.530922
hsa-miR-1301-3p	0.0349969	4.9159	0.26438	0.530922
hsa-miR-449c-5p	0.240715	-4.11656	0.264539	0.530922
hsa-miR-6877-3p	-0.133781	-3.05987	0.264938	0.530922
hsa-miR-1913	-0.158445	-3.39356	0.264983	0.530922
hsa-miR-607	-0.16458	-3.53422	0.265407	0.530922
hsa-miR-6875-3p	0.0758999	-1.07554	0.266025	0.530922
hsa-miR-365a-3p	0.0432545	4.82895	0.266026	0.530922
hsa-miR-365b-3p	0.0432345	4.829	0.266245	0.530922
hsa-miR-6824-3p	0.157665	-3.40989	0.266724	0.531095
hsa-miR-3691-3p	0.0630598	-0.544847	0.267287	0.531434
hsa-miR-7155-5p	0.142566	-3.30222	0.267965	0.532
hsa-miR-3675-3p	-0.161777	-2.38373	0.269643	0.534015
hsa-miR-664b-5p	0.0741739	-0.948537	0.269768	0.534015
hsa-miR-6515-3p	0.0521415	0.320838	0.271091	0.535849
hsa-miR-4659a-5p	-0.0801506	-1.16396	0.27345	0.539725
hsa-miR-181b-5p	0.0418323	5.20082	0.275004	0.542002
hsa-miR-143-3p	0.0835729	3.45066	0.27676	0.54467
hsa-miR-6761-3p	-0.138051	-3.1287	0.277807	0.545581
hsa-miR-18a-5p	-0.109346	2.90141	0.278194	0.545581
hsa-miR-551a	-0.111984	-2.42597	0.278432	0.545581
hsa-miR-7854-3p	0.0722356	-1.10268	0.28013	0.548115
hsa-miR-1908-3p	0.152534	-3.47959	0.282686	0.552319
hsa-miR-154-5p	-0.116871	-1.69923	0.285067	0.556167
hsa-miR-6869-5p	0.178242	-3.76174	0.285737	0.556673
hsa-miR-452-5p	-0.115981	-2.42389	0.287749	0.558743
hsa-miR-5188	-0.0929068	-2.33887	0.288505	0.558743
hsa-miR-1910-3p	0.214646	-4.0933	0.28855	0.558743
hsa-miR-18a-3p	0.0292353	7.92054	0.288571	0.558743
hsa-miR-1972	-0.193023	-3.68676	0.289014	0.558743
hsa-miR-6724-5p	0.131856	-3.1999	0.289275	0.558743
hsa-miR-610	0.056212	0.567035	0.290885	0.561052
hsa-miR-942-5p	0.037264	9.2097	0.291434	0.561311
hsa-miR-181a-2-3p	-0.0353922	6.77238	0.292053	0.561705
hsa-miR-4526	0.166175	-3.71202	0.292593	0.561944
hsa-miR-24-3p	-0.0436829	6.4919	0.294304	0.562686
hsa-miR-6783-5p	-0.0585423	-0.0554135	0.294308	0.562686
hsa-miR-3192-5p	0.108394	-2.30222	0.295241	0.562686
hsa-miR-6794-3p	0.114503	-2.68799	0.295468	0.562686
hsa-miR-548as-5p	-0.180302	-3.91847	0.295573	0.562686
hsa-miR-3682-5p	-0.174278	-3.8401	0.296006	0.562686
hsa-miR-212-3p	-0.111633	-2.71099	0.296101	0.562686
hsa-miR-181d-5p	0.0756886	-0.865074	0.296702	0.562686
hsa-miR-330-5p	0.0482642	2.37345	0.296758	0.562686
hsa-miR-4785	-0.0837775	-1.44856	0.297215	0.562686
hsa-miR-2115-3p	0.0816428	-1.64336	0.298202	0.562686
hsa-miR-6505-5p	0.0806841	-1.87731	0.298519	0.562686
hsa-miR-4773	0.149054	-3.35238	0.298726	0.562686
hsa-miR-199b-5p	-0.0867112	0.376866	0.298797	0.562686
hsa-miR-5187-3p	0.0974197	-2.5392	0.299541	0.563206
hsa-miR-494-5p	0.178219	-3.78034	0.299905	0.563206
hsa-miR-3619-5p	-0.15694	-3.67261	0.301075	0.564448
hsa-miR-378c	-0.0678658	2.69554	0.301622	0.564448
hsa-miR-6751-3p	-0.136286	-3.30397	0.301817	0.564448
hsa-miR-6513-5p	-0.0691973	-1.07651	0.30494	0.56925
hsa-miR-4712-5p	0.162296	-3.77184	0.305575	0.56925
hsa-miR-6505-3p	-0.0561271	0.263819	0.305646	0.56925
hsa-miR-9903	-0.0882479	-1.55811	0.306636	0.570125
hsa-miR-6813-5p	0.109534	-2.76854	0.30705	0.570125
hsa-miR-559	-0.171716	-3.77239	0.307591	0.570125
hsa-miR-766-5p	-0.119855	-2.88752	0.30787	0.570125
hsa-miR-132-3p	-0.0464305	4.43922	0.308221	0.570125
hsa-miR-5583-3p	0.138884	-3.44406	0.309487	0.571007
hsa-miR-6874-3p	-0.143991	-3.45656	0.310514	0.571007
hsa-miR-92b-5p	0.0577141	1.96177	0.310689	0.571007
hsa-miR-671-3p	0.042103	2.80124	0.311012	0.571007
hsa-miR-4670-5p	-0.142813	-3.53509	0.311836	0.571007
hsa-miR-548b-5p	-0.110774	-2.27541	0.311844	0.571007
hsa-miR-412-3p	0.18365	-3.47758	0.311924	0.571007
hsa-miR-6718-5p	0.0940344	-2.1414	0.312617	0.571007
hsa-miR-6818-5p	-0.0773397	-1.63399	0.312636	0.571007
hsa-miR-3154	0.148297	-3.43588	0.312915	0.571007
hsa-miR-371b-3p	0.143153	-3.54488	0.313445	0.571204
hsa-miR-584-5p	-0.0557375	7.03058	0.313879	0.571226
hsa-miR-181b-3p	-0.184501	-4.02748	0.315526	0.573368
hsa-miR-4670-3p	-0.105648	-2.74669	0.315903	0.573368
hsa-miR-3913-5p	-0.0780162	-0.695186	0.317221	0.574989
hsa-miR-4492	-0.0911052	-1.52393	0.317695	0.575079
hsa-miR-92a-1-5p	0.0736088	0.381135	0.320353	0.578611
hsa-miR-6513-3p	-0.0422822	4.16083	0.320501	0.578611
hsa-miR-4660	0.0843985	-1.81291	0.321463	0.579575
hsa-miR-6777-5p	0.162536	-3.75877	0.32371	0.582851
hsa-miR-27a-3p	-0.0729296	3.58984	0.32474	0.583929
hsa-miR-548w	-0.173212	-3.88158	0.328056	0.587622
hsa-miR-363-5p	-0.0482915	0.190989	0.328122	0.587622
hsa-miR-485-5p	0.0907009	-0.542735	0.328863	0.587622
hsa-miR-616-3p	-0.0535801	-0.17318	0.329014	0.587622
hsa-miR-1178-3p	0.0725811	-1.40833	0.329043	0.587622
hsa-miR-4668-5p	0.0905191	-2.3276	0.329398	0.587622
hsa-miR-196a-5p	0.136574	-2.49417	0.331403	0.59042
hsa-miR-22-5p	-0.0440733	5.01122	0.332508	0.590867
hsa-miR-6759-5p	0.196479	-4.06024	0.332526	0.590867
hsa-miR-3195	-0.0927048	-2.17305	0.333183	0.591258
hsa-miR-6769a-3p	-0.152938	-3.65654	0.334952	0.592973
hsa-miR-7-5p	-0.0751189	5.41634	0.335025	0.592973
hsa-miR-7704	-0.050976	0.777658	0.335661	0.593323
hsa-miR-548an	-0.136227	-3.5166	0.336933	0.594273
hsa-miR-6501-5p	0.0604495	0.0526886	0.337077	0.594273
hsa-miR-4753-5p	0.0487435	0.54956	0.338016	0.595155
hsa-miR-4717-3p	-0.110768	-2.70665	0.338997	0.596107
hsa-miR-2278	0.0771644	-1.81281	0.33985	0.596832
hsa-miR-376b-3p	-0.234209	-4.27465	0.342492	0.600692
hsa-miR-1229-5p	0.176082	-3.92139	0.343139	0.601048
hsa-miR-4323	-0.0987956	-2.60253	0.344394	0.602466
hsa-miR-3619-3p	-0.066616	-1.30134	0.344889	0.602555
hsa-miR-6821-5p	-0.197913	-4.03147	0.346081	0.603858
hsa-miR-519d-3p	0.239423	-4.24122	0.346805	0.604342
hsa-miR-3115	-0.192712	-4.08513	0.349726	0.608649
hsa-miR-548x-3p	-0.173476	-4.11532	0.351247	0.610512
hsa-miR-339-3p	-0.0445535	5.21179	0.353188	0.612471
hsa-miR-598-5p	0.179772	-4.09244	0.353279	0.612471
hsa-miR-6763-3p	0.0931055	-2.38916	0.354376	0.613587
hsa-miR-331-3p	-0.0367296	6.25112	0.356119	0.615817
hsa-miR-29c-5p	-0.0398678	5.429	0.357052	0.616643
hsa-miR-3182	-0.136028	-3.7915	0.358841	0.618944
hsa-miR-103a-1-5p	-0.0684738	-0.776537	0.360234	0.61936
hsa-miR-3120-5p	0.144633	-3.6224	0.360358	0.61936
hsa-miR-6813-3p	0.0611354	-0.759696	0.361089	0.61936
hsa-miR-200c-3p	0.041698	3.06759	0.361634	0.61936
hsa-miR-544b	-0.191055	-3.92066	0.361672	0.61936
hsa-miR-107	-0.0574178	8.95475	0.361964	0.61936
hsa-miR-4423-5p	-0.149664	-3.55242	0.363443	0.61936
hsa-miR-181a-5p	0.049469	9.67332	0.363534	0.61936
hsa-miR-223-5p	-0.0843366	-0.13601	0.363691	0.61936
hsa-miR-4512	0.115292	-3.24575	0.364134	0.61936
hsa-miR-668-3p	0.0988061	-2.14987	0.364674	0.61936
hsa-miR-93-3p	-0.0293052	7.91316	0.365998	0.61936
hsa-miR-331-5p	-0.047137	2.34385	0.366056	0.61936
hsa-miR-4766-5p	0.13856	-3.70247	0.366316	0.61936
hsa-miR-323a-3p	-0.0719539	2.06761	0.366488	0.61936
hsa-miR-338-5p	-0.0634433	0.463613	0.366784	0.61936
hsa-miR-95-3p	0.105203	-2.80599	0.367249	0.61936
hsa-miR-6751-5p	0.131844	-3.54713	0.36819	0.61936
hsa-miR-543	-0.0698656	2.91094	0.368676	0.61936
hsa-miR-6769b-3p	0.055993	-0.77872	0.368708	0.61936
hsa-miR-3614-5p	0.0743626	-1.29903	0.368948	0.61936
hsa-miR-6845-5p	-0.183049	-4.08504	0.369146	0.61936
hsa-miR-6738-3p	0.0498987	-0.0422163	0.370725	0.621239
hsa-miR-4726-5p	0.19173	-4.14319	0.372221	0.622976
hsa-miR-4665-5p	0.0726394	-1.85753	0.372898	0.623338
hsa-miR-4662a-5p	0.0961159	-2.09136	0.373538	0.623638
hsa-miR-30c-2-3p	0.15184	-3.46963	0.375692	0.626315
hsa-miR-224-3p	0.165678	-4.05278	0.376281	0.626315
hsa-miR-149-5p	-0.0670655	-0.451492	0.376529	0.626315
hsa-miR-664a-5p	0.0374941	2.36303	0.377066	0.626438
hsa-miR-4504	-0.0937055	-2.50321	0.378552	0.628137
hsa-miR-3613-3p	-0.049976	3.88522	0.379995	0.628315
hsa-miR-6740-3p	0.0912892	-2.84117	0.381407	0.628315
hsa-miR-652-3p	0.0275113	9.2273	0.381774	0.628315
hsa-miR-29b-1-5p	0.070905	-1.05651	0.382125	0.628315
hsa-miR-4482-5p	-0.134514	-2.96671	0.382154	0.628315
hsa-miR-5000-3p	-0.159517	-3.94608	0.382368	0.628315
hsa-miR-7706	0.0367801	4.13283	0.382385	0.628315
hsa-miR-6800-3p	0.0850325	-2.4207	0.382566	0.628315
hsa-miR-889-3p	-0.192003	-4.08301	0.382836	0.628315
hsa-miR-6753-3p	0.0988505	-2.96264	0.385426	0.63073
hsa-miR-4700-5p	-0.204257	-4.09966	0.385648	0.63073
hsa-miR-193b-5p	0.115931	-3.2485	0.385705	0.63073
hsa-miR-3920	0.166774	-4.11053	0.387625	0.632837
hsa-miR-1268b	0.0921445	-1.94512	0.388176	0.632837
hsa-miR-3165	-0.0834514	-2.50672	0.388395	0.632837
hsa-miR-4488	-0.0716133	-1.23989	0.39148	0.63509
hsa-let-7e-3p	-0.0908625	-2.53762	0.392076	0.63509
hsa-miR-186-5p	-0.0370943	9.79117	0.392154	0.63509
hsa-miR-1226-3p	0.0328012	4.12952	0.392187	0.63509
hsa-miR-4446-5p	0.153707	-3.944	0.392266	0.63509
hsa-miR-6797-3p	0.0510178	-0.566067	0.393742	0.63509
hsa-miR-93-5p	-0.0536753	10.4129	0.394344	0.63509
hsa-miR-4484	-0.1322	-3.62713	0.394672	0.63509
hsa-miR-6838-5p	-0.204837	-4.14655	0.395134	0.63509
hsa-miR-6885-5p	0.0557703	-0.807894	0.395303	0.63509
hsa-miR-6758-3p	-0.0379238	1.06471	0.39567	0.63509
hsa-miR-1914-5p	-0.0655474	-1.3746	0.396167	0.63509
hsa-miR-2277-5p	-0.0803873	-2.50961	0.396218	0.63509
hsa-miR-2467-3p	-0.171479	-4.03965	0.396345	0.63509
hsa-miR-99b-3p	0.07766	-1.7785	0.397745	0.63658
hsa-miR-3130-5p	-0.0541426	2.23178	0.401061	0.641129
hsa-miR-219a-1-3p	-0.0446782	-0.393635	0.402367	0.642459
hsa-miR-664a-3p	0.0267243	6.30171	0.404771	0.645536
hsa-miR-4795-3p	0.155402	-4.01603	0.405432	0.64583
hsa-miR-181a-3p	-0.0458909	1.96181	0.407308	0.648055
hsa-miR-6739-5p	0.0925343	-3.02262	0.408883	0.649406
hsa-miR-10396b-3p	-0.174123	-4.14732	0.409116	0.649406
hsa-miR-6770-3p	0.126957	-3.78577	0.410662	0.650809
hsa-miR-548ad-5p	-0.104707	-0.335855	0.410962	0.650809
hsa-miR-425-3p	-0.0253351	4.88658	0.412206	0.650924
hsa-miR-7847-3p	0.0965125	-1.37523	0.41251	0.650924
hsa-miR-4734	0.113213	-3.35842	0.412581	0.650924
hsa-miR-1261	-0.0694088	-1.63212	0.413477	0.650924
hsa-miR-6851-3p	0.055694	-1.146	0.413888	0.650924
hsa-miR-1255a	0.066742	-0.0990752	0.414403	0.650924
hsa-miR-125a-3p	-0.0733915	-2.07516	0.415829	0.650924
hsa-miR-6774-3p	0.0769513	-2.36084	0.416633	0.650924
hsa-miR-22-3p	0.0381492	9.46497	0.417168	0.650924
hsa-miR-4747-3p	-0.0738113	-2.05962	0.417346	0.650924
hsa-miR-6827-3p	-0.165052	-4.0116	0.417492	0.650924
hsa-miR-6852-3p	0.0547088	-0.827923	0.417529	0.650924
hsa-miR-4539	-0.138787	-3.70616	0.417928	0.650924
hsa-miR-6857-3p	0.0363807	0.600255	0.418122	0.650924
hsa-miR-6837-5p	0.0554017	-1.11839	0.418245	0.650924
hsa-let-7g-3p	-0.0920012	-2.93789	0.418912	0.651213
hsa-miR-548ae-5p	-0.105536	-0.574617	0.421223	0.654055
hsa-miR-34c-3p	0.17002	-4.17359	0.424434	0.658286
hsa-miR-5690	-0.0504863	0.560647	0.425057	0.658497
hsa-miR-590-5p	-0.12079	-3.65144	0.425634	0.658638
hsa-miR-1288-3p	-0.064077	-1.55932	0.426655	0.658923
hsa-miR-6853-3p	-0.0598425	-1.69698	0.427265	0.658923
hsa-miR-4317	0.145352	-4.00994	0.427278	0.658923
hsa-miR-1284	-0.0390645	2.53433	0.428493	0.658924
hsa-miR-4708-3p	0.138354	-3.84245	0.428632	0.658924
hsa-miR-19b-1-5p	-0.0922765	-3.00774	0.428739	0.658924
hsa-miR-182-3p	0.0976231	-3.00905	0.429967	0.660063
hsa-miR-6808-3p	0.058473	-1.06187	0.430494	0.660124
hsa-miR-935	-0.0800683	-2.03089	0.432693	0.662744
hsa-miR-7111-3p	0.0542777	-1.02739	0.433311	0.662788
hsa-miR-5588-3p	0.0541923	-1.35725	0.4337	0.662788
hsa-miR-3164	0.0646318	-1.93676	0.435553	0.664288
hsa-miR-664b-3p	0.0274676	3.0129	0.435663	0.664288
hsa-miR-4507	0.100339	-2.67928	0.437402	0.664994
hsa-miR-330-3p	0.0234423	2.8926	0.437782	0.664994
hsa-miR-135a-5p	-0.0755089	-1.60261	0.437953	0.664994
hsa-miR-6894-5p	0.108406	-3.40092	0.438091	0.664994
hsa-miR-542-3p	-0.113203	-3.51749	0.440696	0.667842
hsa-miR-6861-3p	0.0432296	-0.433999	0.440953	0.667842
hsa-miR-3176	0.07304	-1.94761	0.442196	0.668926
hsa-miR-3940-3p	0.0410449	7.18196	0.442967	0.668926
hsa-miR-6766-5p	0.127921	-3.80701	0.44336	0.668926
hsa-miR-4772-3p	0.0640448	1.92202	0.443645	0.668926
hsa-miR-6737-3p	0.0428191	-0.571464	0.447583	0.674113
hsa-miR-4659b-3p	-0.0381322	4.11137	0.450616	0.677927
hsa-miR-511-5p	0.12729	-3.83182	0.454132	0.680341
hsa-miR-6785-5p	0.16844	-4.20655	0.454522	0.680341
hsa-miR-708-5p	-0.103534	-2.87708	0.454756	0.680341
hsa-miR-12136	0.0463865	-0.260155	0.454797	0.680341
hsa-miR-5003-3p	-0.0582374	-1.17031	0.45482	0.680341
hsa-miR-6747-3p	0.0367281	5.112	0.455236	0.680341
hsa-miR-4644	0.0775808	-2.48002	0.457114	0.682395
hsa-miR-6838-3p	-0.142186	-3.94049	0.458572	0.683161
hsa-miR-6882-5p	-0.0485754	-1.04709	0.458636	0.683161
hsa-miR-519a-5p	0.189988	-4.16824	0.460083	0.684563
hsa-miR-3124-3p	0.102248	-3.51941	0.461232	0.685519
hsa-miR-5584-3p	0.122971	-3.79223	0.461824	0.685646
hsa-miR-4753-3p	0.0358132	1.0909	0.465366	0.690149
hsa-miR-4797-5p	-0.133577	-3.9309	0.466148	0.690551
hsa-miR-6716-3p	0.0861221	-2.99922	0.466979	0.690966
hsa-miR-744-5p	-0.0316264	5.26698	0.467448	0.690966
hsa-miR-1276	-0.0741938	-2.51695	0.468017	0.691053
hsa-miR-4516	-0.0605612	-0.0594864	0.468622	0.691192
hsa-miR-4498	-0.0979226	-3.25851	0.471189	0.694222
hsa-miR-4508	-0.0707627	6.5356	0.472475	0.695232
hsa-miR-1537-3p	-0.141912	-4.09804	0.472902	0.695232
hsa-miR-6842-5p	0.0537318	-1.58848	0.473614	0.695525
hsa-miR-3682-3p	-0.0700592	-1.97549	0.474136	0.695536
hsa-miR-769-5p	-0.0330565	2.25398	0.474787	0.695737
hsa-miR-574-3p	0.0233462	6.88557	0.4765	0.697493
hsa-miR-4727-3p	0.074886	-2.54165	0.477911	0.698614
hsa-miR-6852-5p	0.0306087	0.393162	0.478298	0.698614
hsa-miR-24-1-5p	-0.090178	-3.23936	0.479509	0.699628
hsa-miR-424-3p	-0.0306919	4.80369	0.480372	0.700134
hsa-miR-576-3p	-0.0553216	2.20567	0.483567	0.704032
hsa-miR-4707-3p	0.113471	2.21596	0.485123	0.704891
hsa-miR-9985	-0.112808	-3.69736	0.485199	0.704891
hsa-miR-643	-0.0714918	-1.61463	0.487316	0.707208
hsa-miR-323b-3p	-0.0607214	2.7307	0.488462	0.708113
hsa-miR-6753-5p	0.139744	-3.91798	0.489666	0.709078
hsa-miR-323a-5p	0.131777	-3.97989	0.490175	0.709078
hsa-miR-7106-3p	0.0442864	-1.03165	0.491573	0.710342
hsa-miR-30c-5p	-0.027906	11.8858	0.492366	0.710729
hsa-let-7a-5p	-0.039764	12.9532	0.492939	0.710798
hsa-miR-7843-3p	0.0934247	-3.41167	0.494464	0.712239
hsa-miR-1225-3p	0.0952428	-3.27444	0.497752	0.716212
hsa-miR-1292-3p	0.0412058	-0.523044	0.501234	0.720457
hsa-miR-99b-5p	-0.0324534	5.60092	0.50183	0.720549
hsa-miR-3150a-3p	0.0489169	-1.47855	0.505802	0.725484
hsa-miR-3194-3p	-0.0886353	-3.35211	0.507109	0.726587
hsa-miR-6134	-0.0640819	-3.03643	0.508031	0.72677
hsa-miR-125b-1-3p	0.0972822	-2.60776	0.50831	0.72677
hsa-miR-6833-5p	0.131515	-4.04309	0.512688	0.731012
hsa-miR-579-5p	-0.0387801	0.0228759	0.512846	0.731012
hsa-miR-6848-5p	0.0844186	-3.14397	0.512896	0.731012
hsa-miR-7850-5p	0.109541	-3.87925	0.514864	0.733045
hsa-miR-1179	-0.0529255	-0.958316	0.51707	0.73365
hsa-miR-4469	-0.12081	-3.93052	0.517448	0.73365
hsa-miR-6875-5p	0.0589124	-2.26567	0.518064	0.73365
hsa-miR-6873-3p	0.0270892	1.58305	0.518265	0.73365
hsa-miR-4685-3p	0.0299961	7.23841	0.518326	0.73365
hsa-let-7d-5p	-0.0321864	10.1206	0.51854	0.73365
hsa-miR-548h-3p	-0.0545439	3.12548	0.520251	0.734962
hsa-miR-3187-5p	0.123749	-4.02611	0.520553	0.734962
hsa-miR-6862-3p	0.0668632	-2.75813	0.522464	0.7366
hsa-miR-548z	-0.0542498	3.12762	0.522801	0.7366
hsa-miR-6803-5p	-0.118605	-4.01443	0.524843	0.738708
hsa-miR-4635	-0.0390624	-0.244848	0.52547	0.738823
hsa-miR-628-5p	-0.0444872	-0.814864	0.527093	0.740336
hsa-miR-485-3p	0.052677	4.53807	0.529113	0.742403
hsa-miR-486-5p	0.0249032	19.0188	0.53085	0.74407
hsa-miR-941	-0.0252928	5.44459	0.532276	0.745296
hsa-miR-6820-5p	0.0712102	-3.00559	0.532847	0.745326
hsa-miR-96-5p	-0.0731834	3.39963	0.533788	0.745871
hsa-miR-508-3p	0.0957924	-3.65999	0.535022	0.746825
hsa-miR-219b-3p	-0.150862	-4.29217	0.536125	0.747594
hsa-miR-6816-3p	-0.0432937	-0.923238	0.537558	0.74882
hsa-miR-6502-5p	-0.0903927	-3.58096	0.540406	0.752014
hsa-miR-6779-5p	0.118306	-4.03458	0.541061	0.752153
hsa-miR-3168	-0.0410062	-1.63315	0.543411	0.753979
hsa-miR-7112-3p	-0.100974	-3.76695	0.543489	0.753979
hsa-miR-1304-5p	-0.0278623	0.717351	0.544984	0.755252
hsa-miR-6862-5p	0.0413235	-1.11321	0.546356	0.755252
hsa-miR-542-5p	0.034699	-0.320812	0.546379	0.755252
hsa-miR-548ap-3p	-0.0930239	-3.7083	0.546637	0.755252
hsa-miR-6780a-3p	-0.0334304	-0.362081	0.548189	0.756365
hsa-miR-221-3p	0.040158	7.62625	0.549157	0.756365
hsa-miR-548q	0.0343565	1.05661	0.549504	0.756365
hsa-miR-30b-3p	-0.0541142	-1.3132	0.549678	0.756365
hsa-miR-4659a-3p	-0.0347224	4.97111	0.551063	0.757502
hsa-miR-6801-5p	0.0794799	-3.25251	0.556537	0.764251
hsa-miR-4470	0.121904	-4.15734	0.558552	0.766241
hsa-miR-940	0.0455903	-1.5713	0.562448	0.770805
hsa-miR-155-5p	-0.0266786	4.38908	0.563746	0.771668
hsa-miR-619-5p	0.0425747	-1.31803	0.564218	0.771668
hsa-miR-6867-3p	0.115599	-4.05745	0.565556	0.772717
hsa-miR-3928-3p	0.0240078	1.02254	0.566752	0.773153
hsa-miR-1298-5p	-0.133802	-4.25455	0.567294	0.773153
hsa-miR-133b	-0.080261	-3.45509	0.567588	0.773153
hsa-miR-3928-5p	0.072954	-3.30869	0.569565	0.775066
hsa-miR-6731-3p	-0.0571542	-2.41886	0.572542	0.777811
hsa-miR-6763-5p	-0.111915	-3.97762	0.572731	0.777811
hsa-miR-6818-3p	-0.0261314	2.41907	0.574134	0.778936
hsa-miR-335-3p	-0.0339933	3.26091	0.575399	0.77987
hsa-miR-4435	0.0313501	0.208232	0.577638	0.78188
hsa-miR-503-3p	0.0537769	-2.5401	0.578641	0.78188
hsa-let-7i-3p	0.0294524	0.974558	0.578672	0.78188
hsa-miR-6770-5p	-0.0692929	-3.27083	0.579192	0.78188
hsa-miR-5009-5p	-0.03377	-0.971	0.580362	0.782563
hsa-miR-6847-3p	0.0592671	-2.77351	0.580853	0.782563
hsa-miR-152-3p	-0.030776	1.72563	0.582024	0.783361
hsa-miR-1248	0.0814644	-3.47478	0.58474	0.785589
hsa-miR-3188	0.0576383	-1.94803	0.585132	0.785589
hsa-miR-3184-3p	0.10156	-3.98095	0.58542	0.785589
hsa-miR-3179	0.0255691	0.966174	0.589779	0.790655
hsa-miR-148b-5p	-0.0395608	-0.185045	0.590919	0.791399
hsa-miR-378b	0.0831532	-3.90817	0.593136	0.793584
hsa-miR-11401	-0.069542	2.10741	0.594155	0.794162
hsa-miR-499a-5p	-0.0722843	-3.31233	0.595875	0.79448
hsa-miR-933	-0.0521791	-2.51766	0.596651	0.79448
hsa-miR-5001-3p	-0.0270562	3.36985	0.597672	0.79448
hsa-miR-3609	0.0687724	-3.11949	0.59837	0.79448
hsa-miR-151b	0.0185694	8.21474	0.598962	0.79448
hsa-miR-4485-3p	0.0843196	-3.559	0.599624	0.79448
hsa-miR-550b-2-5p	0.0269845	-0.210827	0.599717	0.79448
hsa-miR-432-5p	0.0518443	0.143195	0.599933	0.79448
hsa-miR-483-5p	0.0751664	-2.94797	0.600846	0.79448
hsa-miR-6727-3p	0.0350451	-0.859726	0.601022	0.79448
hsa-miR-96-3p	0.109082	-4.05286	0.601368	0.79448
hsa-miR-4667-3p	0.0395063	-1.5176	0.601777	0.79448
hsa-miR-4754	0.0477471	-2.16004	0.602021	0.79448
hsa-miR-487b-5p	0.0686177	-2.93181	0.604122	0.796057
hsa-miR-6733-3p	-0.0606344	-3.00139	0.604392	0.796057
hsa-miR-493-3p	0.0536821	-1.56998	0.605051	0.79615
hsa-miR-127-5p	-0.0885318	-3.87816	0.605735	0.796277
hsa-miR-4664-5p	-0.0689923	-3.38272	0.607165	0.797383
hsa-miR-581	-0.038716	-0.600182	0.610084	0.799625
hsa-miR-224-5p	0.0471525	0.0583628	0.610622	0.799625
hsa-miR-6847-5p	-0.0505169	-2.56799	0.610644	0.799625
hsa-miR-3125	-0.0790809	-3.2468	0.612796	0.801668
hsa-miR-6729-5p	-0.0653305	-3.18741	0.615445	0.804355
hsa-miR-642a-5p	0.0309158	0.345254	0.618055	0.806201
hsa-miR-450a-1-3p	-0.0768241	-3.61523	0.618277	0.806201
hsa-miR-5001-5p	0.076996	-3.6887	0.618691	0.806201
hsa-miR-449a	-0.112907	-4.18886	0.619238	0.806201
hsa-miR-3158-3p	0.0214834	2.25047	0.620238	0.806726
hsa-miR-378f	-0.0396639	-2.28813	0.621085	0.807015
hsa-miR-2355-3p	-0.0382482	-1.03689	0.621652	0.807015
hsa-miR-6892-3p	0.120406	-4.11864	0.622626	0.807506
hsa-miR-7108-3p	0.0450037	-2.27025	0.623244	0.807533
hsa-miR-92a-2-5p	0.0497843	-2.5655	0.626253	0.809928
hsa-miR-6809-5p	0.0608123	-3.08207	0.626454	0.809928
hsa-miR-4748	-0.0591421	-2.9212	0.626974	0.809928
hsa-miR-1180-5p	0.0648869	-3.32073	0.627485	0.809928
hsa-miR-1228-3p	-0.0365815	-0.297777	0.62923	0.811407
hsa-miR-6758-5p	-0.0797242	-3.51638	0.630031	0.811667
hsa-miR-4436a	-0.0980663	-4.03343	0.631747	0.812833
hsa-miR-642a-3p	0.039572	-1.64734	0.632889	0.812833
hsa-miR-346	-0.0641163	-2.06994	0.632919	0.812833
hsa-miR-548al	-0.0476839	-2.40039	0.633337	0.812833
hsa-miR-5189-3p	-0.0546843	3.42836	0.634558	0.813628
hsa-miR-4640-3p	-0.105716	-4.12613	0.636382	0.815196
hsa-miR-144-3p	-0.455832	1.16415	0.638171	0.816715
hsa-miR-3163	0.0233471	1.22177	0.639587	0.817753
hsa-miR-874-3p	0.0255448	1.99261	0.640902	0.818662
hsa-miR-1249-3p	-0.0277325	5.18348	0.642543	0.819984
hsa-miR-6790-3p	0.0380772	-2.15609	0.645207	0.821688
hsa-miR-4787-5p	-0.0495682	-2.39448	0.645792	0.821688
hsa-miR-3936	0.0608219	-3.28895	0.645897	0.821688
hsa-miR-30a-5p	0.0272648	4.78786	0.646424	0.821688
hsa-miR-449b-3p	0.0834324	-3.91264	0.646912	0.821688
hsa-miR-642b-5p	0.0379222	-1.44918	0.648809	0.823325
hsa-miR-1273c	-0.0230155	-0.050157	0.64998	0.824038
hsa-miR-760	-0.0460959	-2.31887	0.650857	0.824379
hsa-miR-7151-3p	-0.101384	-4.1532	0.651723	0.824703
hsa-miR-597-3p	-0.0249057	-0.0708865	0.655314	0.828473
hsa-miR-4437	-0.0744554	-3.72827	0.656042	0.82862
hsa-miR-4521	-0.0258883	-0.383157	0.659076	0.831677
hsa-miR-124-3p	0.0964924	-4.21922	0.663155	0.835057
hsa-miR-3144-5p	-0.0693598	-3.62006	0.663404	0.835057
hsa-miR-196a-1-3p	0.0757374	-2.19739	0.663742	0.835057
hsa-miR-6789-3p	-0.0338084	-1.66932	0.664222	0.835057
hsa-miR-4433b-3p	0.0490831	-2.2765	0.667706	0.837956
hsa-miR-4779	-0.0464699	-2.71469	0.66995	0.837956
hsa-miR-6884-3p	0.0267254	-0.860884	0.67089	0.837956
hsa-miR-103a-2-5p	-0.024114	2.58945	0.671192	0.837956
hsa-miR-3191-3p	-0.0537701	-3.17151	0.672499	0.837956
hsa-miR-4712-3p	-0.0798655	-3.94779	0.673366	0.837956
hsa-miR-127-3p	-0.038594	0.670206	0.673491	0.837956
hsa-miR-6782-5p	0.0645606	-3.60199	0.67357	0.837956
hsa-miR-4738-5p	-0.0732785	-3.8329	0.674086	0.837956
hsa-miR-1246	0.0612053	-2.15592	0.674376	0.837956
hsa-miR-6131	-0.0339083	-1.74748	0.674746	0.837956
hsa-miR-296-5p	-0.0233411	4.74363	0.675117	0.837956
hsa-miR-326	-0.0223947	3.81137	0.675259	0.837956
hsa-miR-3909	-0.0271434	2.51367	0.675665	0.837956
hsa-miR-129-5p	-0.0362802	-1.65038	0.676018	0.837956
hsa-miR-506-3p	0.0753675	-4.00439	0.676449	0.837956
hsa-miR-4733-5p	0.081192	-4.00857	0.677049	0.837956
hsa-miR-6785-3p	0.059879	-3.49169	0.67847	0.838949
hsa-miR-589-5p	0.014606	4.88267	0.67963	0.839139
hsa-miR-4632-3p	0.0335949	-1.28786	0.679864	0.839139
hsa-miR-423-3p	0.01449	10.6652	0.683992	0.843466
hsa-miR-4482-3p	-0.0670475	0.540798	0.685208	0.844196
hsa-miR-3661	0.028716	-1.56388	0.687095	0.84556
hsa-miR-329-5p	0.0735401	-4.06395	0.687564	0.84556
hsa-miR-1262	0.0570262	-3.37881	0.691706	0.849711
hsa-miR-6831-3p	0.0814275	-4.16512	0.692505	0.849711
hsa-miR-6508-5p	-0.0546045	-3.45772	0.692822	0.849711
hsa-miR-629-5p	-0.017144	7.29014	0.694965	0.851568
hsa-miR-151a-3p	-0.0191463	7.91269	0.697114	0.853429
hsa-miR-483-3p	-0.0405324	1.26182	0.699971	0.856153
hsa-miR-6515-5p	0.0352909	-2.33753	0.701335	0.857046
hsa-miR-6856-3p	0.0710886	-3.9695	0.703647	0.858697
hsa-miR-3175	-0.0585323	-3.49824	0.703954	0.858697
hsa-miR-3129-3p	-0.0383242	-2.39746	0.705763	0.859908
hsa-miR-4638-5p	-0.0522695	-3.43729	0.706217	0.859908
hsa-miR-5587-3p	0.0499746	-3.38492	0.706885	0.859949
hsa-miR-3944-5p	-0.0166153	0.888018	0.709244	0.862043
hsa-miR-4479	0.0318993	-2.13645	0.713272	0.866162
hsa-miR-6799-3p	0.0220668	0.0575068	0.716288	0.869045
hsa-miR-26a-1-3p	-0.034501	-1.53209	0.717832	0.870139
hsa-miR-4525	0.0463606	-2.69005	0.718622	0.870317
hsa-miR-10527-5p	0.0135819	3.08714	0.719382	0.870459
hsa-miR-584-3p	0.0172028	1.86206	0.721695	0.872478
hsa-miR-3157-3p	0.0225318	0.194858	0.723575	0.87397
hsa-miR-27a-5p	-0.034259	-2.26724	0.724532	0.874346
hsa-miR-410-3p	-0.0588319	-3.69965	0.72543	0.87465
hsa-miR-3180	0.0351355	-2.25374	0.726368	0.875002
hsa-miR-939-3p	-0.0586291	-3.7553	0.727729	0.875368
hsa-miR-3180-3p	0.0348369	-2.25363	0.728571	0.875368
hsa-miR-433-3p	0.0303591	1.2741	0.728707	0.875368
hsa-miR-2276-5p	0.0597688	-3.83395	0.729821	0.875368
hsa-miR-7151-5p	-0.0780856	-4.15706	0.732204	0.875368
hsa-miR-5090	0.0212693	-0.12459	0.732516	0.875368
hsa-miR-5009-3p	-0.0697196	-4.13554	0.732699	0.875368
hsa-miR-4786-5p	-0.0313969	-2.36303	0.733139	0.875368
hsa-miR-222-5p	-0.0703737	-4.11327	0.733189	0.875368
hsa-miR-1910-5p	0.0384912	-2.94545	0.73353	0.875368
hsa-miR-6834-3p	-0.0421309	-3.22788	0.733784	0.875368
hsa-miR-5585-3p	0.0435192	-2.60674	0.734608	0.87558
hsa-miR-6832-5p	0.0398538	-2.98687	0.736296	0.876728
hsa-miR-125b-5p	0.0299086	7.66173	0.737036	0.876728
hsa-miR-6731-5p	-0.0706795	-4.0416	0.737765	0.876728
hsa-miR-4784	0.0478628	-2.73107	0.73827	0.876728
hsa-miR-6829-3p	0.0590447	-3.87476	0.739374	0.876728
hsa-miR-222-3p	-0.0147533	5.9013	0.740053	0.876728
hsa-miR-6089	0.0565917	-3.89686	0.740103	0.876728
hsa-miR-3184-5p	-0.0691884	-4.03002	0.741742	0.877354
hsa-miR-4767	-0.0623439	-3.95723	0.741928	0.877354
hsa-miR-338-3p	-0.0365603	-2.765	0.744459	0.879579
hsa-miR-3613-5p	-0.228646	0.621218	0.748088	0.882796
hsa-miR-4510	-0.0315763	-3.04115	0.748486	0.882796
hsa-miR-5581-3p	-0.0127862	2.00518	0.751358	0.885412
hsa-miR-6764-5p	0.0151667	0.0718377	0.753204	0.886097
hsa-miR-6807-3p	0.0271853	-2.06522	0.753248	0.886097
hsa-miR-3685	-0.0208393	-1.32978	0.755548	0.887491
hsa-miR-5588-5p	-0.0398852	-3.27391	0.756002	0.887491
hsa-miR-4781-3p	0.0138822	1.6609	0.757173	0.887491
hsa-miR-4742-3p	-0.0161158	5.47244	0.757506	0.887491
hsa-miR-27b-5p	0.025481	-1.86367	0.758277	0.887491
hsa-miR-1909-3p	0.0589042	-4.01799	0.759593	0.887491
hsa-miR-6807-5p	0.0313586	-2.64556	0.759707	0.887491
hsa-miR-576-5p	-0.0164158	8.62801	0.760812	0.887491
hsa-miR-4653-3p	-0.0515836	-3.66486	0.761479	0.887491
hsa-miR-4645-3p	-0.0302003	-2.54372	0.761578	0.887491
hsa-miR-370-5p	0.0549577	-4.15439	0.761643	0.887491
hsa-miR-4755-3p	-0.0187704	-1.04285	0.76287	0.88776
hsa-miR-500b-3p	-0.0233938	-1.68481	0.763185	0.88776
hsa-miR-6755-5p	0.033983	-2.96111	0.764917	0.888265
hsa-miR-134-3p	-0.0641944	-4.08669	0.764931	0.888265
hsa-miR-6890-5p	-0.0595619	-3.96111	0.766402	0.88921
hsa-miR-618	-0.0191705	2.16078	0.768367	0.890727
hsa-miR-4763-5p	-0.0209152	-0.953347	0.771493	0.893109
hsa-miR-134-5p	-0.0250573	0.686085	0.771775	0.893109
hsa-miR-1285-5p	0.00962885	3.6456	0.772401	0.893109
hsa-miR-4511	-0.0135157	1.5865	0.773661	0.893418
hsa-miR-4749-5p	0.033177	-2.97532	0.773988	0.893418
hsa-miR-147b-3p	0.0531203	-4.08916	0.778724	0.898119
hsa-miR-6739-3p	-0.0195513	-1.26582	0.779648	0.89842
hsa-miR-3680-3p	-0.0173726	-0.957115	0.78103	0.899248
hsa-miR-345-5p	-0.0122957	4.42348	0.783653	0.900241
hsa-miR-2115-5p	0.0236576	-2.04956	0.784375	0.900241
hsa-miR-1224-5p	0.0290448	-1.84188	0.784384	0.900241
hsa-miR-769-3p	-0.0179672	-0.816751	0.785252	0.900241
hsa-miR-4422	-0.0270577	-1.91134	0.785548	0.900241
hsa-miR-3692-3p	-0.0256392	-2.54851	0.787447	0.900241
hsa-miR-5010-3p	-0.00870104	6.35751	0.787465	0.900241
hsa-miR-3667-3p	0.0277357	-0.209351	0.787744	0.900241
hsa-miR-580-3p	0.0487916	-3.95258	0.787962	0.900241
hsa-miR-937-5p	0.0567701	-4.17819	0.788542	0.900241
hsa-miR-7705	-0.0484881	-3.94092	0.790146	0.900956
hsa-miR-1909-5p	-0.0364357	-3.43836	0.790499	0.900956
hsa-miR-504-5p	0.0237033	0.439821	0.79211	0.902003
hsa-miR-6868-3p	-0.0288257	0.409065	0.79275	0.902003
hsa-miR-501-5p	0.00939838	5.119	0.794143	0.902829
hsa-miR-378i	-0.0159402	1.72698	0.795331	0.903422
hsa-miR-493-5p	-0.0283444	-0.566523	0.797326	0.904928
hsa-miR-25-5p	0.0116788	3.07009	0.800721	0.907595
hsa-miR-183-3p	-0.0133439	4.9226	0.80127	0.907595
hsa-miR-212-5p	-0.0165057	-0.950747	0.801687	0.907595
hsa-miR-100-5p	-0.0457333	7.68478	0.805431	0.91104
hsa-miR-6874-5p	0.0534904	-4.1369	0.806199	0.91104
hsa-miR-5189-5p	-0.0245232	0.196854	0.807763	0.91104
hsa-miR-16-1-3p	0.0386796	-3.71649	0.808052	0.91104
hsa-miR-210-3p	0.0167712	3.79775	0.808094	0.91104
hsa-miR-6893-3p	0.0199944	-1.78009	0.810798	0.913329
hsa-miR-146b-3p	0.011765	0.726088	0.811865	0.91377
hsa-miR-6767-5p	-0.0116739	-0.0269979	0.820459	0.921269
hsa-miR-1296-5p	-0.01478	0.483812	0.820528	0.921269
hsa-miR-548aw	-0.0325813	-3.58066	0.821056	0.921269
hsa-miR-550a-3-5p	-0.00742614	4.5806	0.82125	0.921269
hsa-miR-1255b-5p	-0.00953474	2.12369	0.823616	0.922581
hsa-miR-6821-3p	0.0345775	-3.59693	0.823782	0.922581
hsa-miR-4999-3p	-0.0412861	-3.98311	0.824664	0.922805
hsa-miR-6879-3p	0.00960668	1.41961	0.832389	0.930421
hsa-miR-10b-5p	-0.0154911	1.28242	0.83333	0.930421
hsa-miR-320a-5p	-0.0166464	-1.62959	0.834154	0.930421
hsa-miR-4797-3p	-0.0161896	-1.5947	0.83463	0.930421
hsa-miR-29b-2-5p	-0.0100894	4.36198	0.834905	0.930421
hsa-miR-148a-5p	-0.00852582	2.39818	0.837078	0.931998
hsa-miR-4762-3p	0.0301476	-3.58361	0.838155	0.931998
hsa-miR-4676-5p	0.0110741	-0.646723	0.839083	0.931998
hsa-miR-4701-5p	0.022797	-2.80336	0.839245	0.931998
hsa-miR-4781-5p	-0.0161039	-1.86129	0.839762	0.931998
hsa-miR-4741	0.0317368	-3.66267	0.841689	0.932639
hsa-miR-651-5p	-0.0276218	-3.16108	0.841739	0.932639
hsa-miR-4654	0.0519697	-4.22618	0.842406	0.932639
hsa-miR-3191-5p	-0.0176531	-2.23083	0.843196	0.932751
hsa-miR-30d-5p	-0.0066043	12.9503	0.844153	0.933047
hsa-miR-4796-3p	-0.0322525	-3.88471	0.846784	0.934429
hsa-miR-3939	-0.0147797	-1.71364	0.847082	0.934429
hsa-miR-6806-3p	0.010449	1.44195	0.847524	0.934429
hsa-miR-6849-3p	-0.0109895	0.094159	0.848163	0.934429
hsa-miR-4638-3p	-0.0181851	-2.475	0.850169	0.935877
hsa-miR-5006-3p	-0.0118051	0.99821	0.852329	0.937493
hsa-miR-186-3p	0.0201376	-2.86799	0.857156	0.942036
hsa-miR-3121-3p	0.0201374	-2.86856	0.857926	0.942118
hsa-miR-675-3p	0.0401209	-4.2251	0.858879	0.9424
hsa-miR-5587-5p	0.0257862	-3.6353	0.861715	0.943402
hsa-miR-654-5p	-0.0161953	-1.28297	0.863408	0.943402
hsa-miR-3074-5p	0.00687799	2.3253	0.864411	0.943402
hsa-miR-425-5p	-0.00558739	11.4287	0.864639	0.943402
hsa-miR-211-5p	0.00906628	0.177276	0.864936	0.943402
hsa-miR-6738-5p	0.0331766	-4.16084	0.865204	0.943402
hsa-miR-605-3p	-0.0337725	-4.02859	0.865605	0.943402
hsa-miR-6501-3p	0.021016	-3.23852	0.866443	0.943402
hsa-miR-4664-3p	-0.0222297	-3.33279	0.866805	0.943402
hsa-miR-590-3p	-0.283364	-3.45487	0.866851	0.943402
hsa-miR-5088-3p	-0.0320045	-4.05248	0.868818	0.943402
hsa-miR-4676-3p	-0.0103623	-0.714476	0.868847	0.943402
hsa-miR-4722-5p	-0.0242184	-3.46992	0.86885	0.943402
hsa-let-7c-5p	-0.00805846	5.86032	0.871485	0.944634
hsa-miR-4524a-3p	0.0245521	-3.85301	0.871765	0.944634
hsa-miR-4707-5p	-0.0211174	-2.06262	0.872077	0.944634
hsa-miR-758-5p	0.0263612	-3.94131	0.873591	0.945438
hsa-miR-522-3p	0.0357043	-3.8438	0.874216	0.945438
hsa-miR-1260b	0.00756091	10.2695	0.877753	0.948506
hsa-miR-6771-5p	-0.0326408	-4.1058	0.879861	0.948663
hsa-miR-4661-5p	-0.00940421	0.0337876	0.881062	0.948663
hsa-miR-223-3p	-0.00644451	12.8104	0.881408	0.948663
hsa-miR-3124-5p	-0.0125765	-1.59832	0.881668	0.948663
hsa-miR-4731-3p	-0.0292979	-3.98135	0.882688	0.948663
hsa-miR-7703	0.0166292	-2.99627	0.882696	0.948663
hsa-miR-874-5p	0.0100319	-1.18003	0.882803	0.948663
hsa-miR-659-5p	0.0117058	-1.71679	0.884515	0.949749
hsa-miR-129-2-3p	0.0108615	-1.59479	0.886347	0.950961
hsa-miR-505-3p	0.00444854	6.76834	0.887131	0.951049
hsa-miR-10397-5p	-0.0135075	-2.48154	0.889699	0.953048
hsa-miR-3177-3p	0.00631357	1.48832	0.892493	0.955286
hsa-miR-491-5p	0.00744227	0.706912	0.894239	0.956398
hsa-miR-122-5p	-0.0136892	0.892592	0.89506	0.95652
hsa-miR-4474-3p	0.0209329	-3.77837	0.896488	0.957291
hsa-miR-4747-5p	0.0136551	-2.57602	0.897234	0.957332
hsa-miR-518b	0.0345142	-4.24579	0.898506	0.957404
hsa-miR-3149	0.0267381	-4.07017	0.898715	0.957404
hsa-miR-3150b-5p	-0.0126017	-2.53522	0.900965	0.958318
hsa-miR-629-3p	-0.00475652	1.99249	0.900989	0.958318
hsa-miR-3190-3p	0.0104953	-2.19169	0.902647	0.959328
hsa-miR-513c-5p	0.0189274	-3.78128	0.903675	0.959668
hsa-miR-4724-5p	-0.0245457	-4.08287	0.90518	0.960513
hsa-miR-6805-5p	-0.0114434	-2.07962	0.908469	0.962767
hsa-miR-4727-5p	-0.0232821	-4.03507	0.908727	0.962767
hsa-miR-3620-5p	0.0134593	-1.29211	0.910302	0.963023
hsa-miR-1292-5p	0.00496131	4.53567	0.910391	0.963023
hsa-miR-139-5p	0.0067663	3.56243	0.91423	0.965325
hsa-miR-548at-3p	0.00866952	-1.47647	0.914328	0.965325
hsa-miR-1236-5p	0.015762	-3.55313	0.914706	0.965325
hsa-miR-1343-5p	0.0231257	-3.89409	0.915465	0.965374
hsa-miR-6788-3p	0.0210128	-4.07666	0.921415	0.969887
hsa-miR-4804-5p	-0.00710255	-0.173384	0.921984	0.969887
hsa-miR-378g	0.00841826	-2.49618	0.922262	0.969887
hsa-miR-4757-5p	-0.0202795	-4.11691	0.92261	0.969887
hsa-miR-3667-5p	-0.0093959	2.148	0.925184	0.971838
hsa-miR-92a-3p	-0.0036224	17.3691	0.92744	0.973453
hsa-miR-339-5p	-0.0047191	6.52132	0.928561	0.973874
hsa-miR-625-3p	0.00440861	5.86237	0.929311	0.973907
hsa-miR-4766-3p	-0.0144987	-3.86874	0.931807	0.975767
hsa-miR-4714-5p	0.00949644	-3.19175	0.935446	0.978821
hsa-miR-4448	-0.00342151	2.0966	0.936861	0.979544
hsa-miR-1256	0.00666886	-2.24275	0.940514	0.982605
hsa-miR-487a-5p	0.00837406	-2.19304	0.9413	0.982668
hsa-miR-1912-3p	-0.0133869	-4.20304	0.943479	0.983247
hsa-miR-7851-3p	0.00809872	-2.71921	0.944026	0.983247
hsa-miR-409-3p	0.00555463	5.44544	0.944531	0.983247
hsa-miR-943	0.00426613	-1.01207	0.944759	0.983247
hsa-miR-3200-3p	-0.00303969	4.39634	0.945535	0.983298
hsa-miR-3529-5p	-0.0105632	-3.57011	0.948754	0.985889
hsa-miR-138-2-3p	0.0120601	-3.97291	0.949798	0.986217
hsa-miR-3162-3p	0.00454163	-1.20343	0.951017	0.986375
hsa-miR-873-3p	-0.0120884	-3.82946	0.951408	0.986375
hsa-miR-6503-5p	-0.00421917	-1.3409	0.953128	0.986562
hsa-miR-450a-2-3p	0.00415889	-1.03626	0.95423	0.986562
hsa-miR-6784-3p	0.00868987	-3.65932	0.954951	0.986562
hsa-miR-6837-3p	-0.0033489	-0.951487	0.955978	0.986562
hsa-miR-6509-5p	0.00410867	-1.63208	0.955992	0.986562
hsa-miR-642b-3p	-0.00929241	-3.76029	0.95666	0.986562
hsa-miR-3158-5p	-0.00257406	0.5904	0.957847	0.986562
hsa-miR-4639-5p	-0.0130107	-4.16284	0.958977	0.986562
hsa-miR-6779-3p	0.00625772	-2.97963	0.959475	0.986562
hsa-miR-1343-3p	0.0026635	2.02538	0.959788	0.986562
hsa-let-7i-5p	-0.00339441	9.63183	0.960789	0.986562
hsa-miR-660-3p	0.00239709	1.65052	0.961042	0.986562
hsa-miR-3611	0.0112082	-4.2455	0.96106	0.986562
hsa-miR-2277-3p	0.00284673	-0.443364	0.961794	0.986568
hsa-miR-378d	0.00365928	-1.02055	0.96285	0.986903
hsa-miR-1250-5p	0.00584405	-3.30347	0.964528	0.987875
hsa-miR-145-3p	-0.003293	-0.150304	0.966169	0.988808
hsa-miR-3918	-0.00568329	-3.18523	0.967267	0.989184
hsa-miR-4440	0.00295599	-0.114046	0.968942	0.990149
hsa-miR-16-2-3p	-0.00304978	10.1645	0.969959	0.990209
hsa-miR-10396b-5p	-0.00630684	-3.85131	0.970814	0.990209
hsa-miR-1228-5p	-0.00611977	-3.59638	0.971345	0.990209
hsa-miR-6736-5p	0.00549703	-3.51181	0.971926	0.990209
hsa-miR-28-5p	-0.00144124	4.27717	0.974986	0.99258
hsa-miR-199a-5p	-0.00175735	3.33552	0.976119	0.992987
hsa-miR-6801-3p	0.00317296	-3.24478	0.980528	0.996328
hsa-miR-4799-5p	0.00305312	-3.14866	0.980876	0.996328
hsa-let-7d-3p	0.00119025	8.78546	0.982882	0.996632
hsa-miR-361-5p	0.000946916	7.22136	0.983313	0.996632
hsa-miR-3159	-0.00458457	-4.09703	0.985043	0.996632
hsa-miR-4318	-0.00286522	-3.89177	0.985721	0.996632
hsa-miR-505-5p	-0.000590323	3.25402	0.987227	0.996632
hsa-miR-6800-5p	0.00328139	-4.22045	0.987236	0.996632
hsa-miR-1260a	-0.000775337	10.2571	0.987473	0.996632
hsa-miR-3679-3p	-0.00410799	-3.85597	0.98805	0.996632
hsa-miR-4489	-0.00138217	-2.53062	0.989585	0.996632
hsa-miR-130b-5p	-0.000382285	8.07359	0.990187	0.996632
hsa-miR-191-5p	-0.000346786	15.3117	0.990545	0.996632
hsa-miR-6736-3p	-0.00148625	-2.96402	0.990963	0.996632
hsa-miR-378a-5p	0.000486954	5.82332	0.991472	0.996632
hsa-miR-382-5p	0.00102132	0.866622	0.991636	0.996632
hsa-miR-3139	-0.00214587	-3.85989	0.992834	0.996632
hsa-miR-4688	-0.00158133	-3.37444	0.99344	0.996632
hsa-miR-18b-3p	0.000272526	4.31587	0.993878	0.996632
hsa-miR-31-5p	-0.00104128	-1.75278	0.994423	0.996632
hsa-miR-184	0.000434904	-1.36158	0.995538	0.997011
hsa-miR-7849-3p	-0.00233156	-3.87855	0.999025	0.999645
hsa-miR-6895-5p	0.000160346	-3.5179	0.999645	0.999645

## Sheet: Moderate Stage
ID	logFC	AveExpr	P.Value	adj.P.Val
hsa-miR-183-5p	-0.597551	8.12605	2.00134e-26	2.70981e-23
hsa-miR-624-5p	-0.600351	-0.72294	1.36552e-16	9.24455e-14
hsa-miR-15a-5p	-0.585747	5.93876	2.79121e-16	1.25977e-13
hsa-miR-1180-3p	0.172053	7.19636	4.89522e-15	1.65703e-12
hsa-miR-3143	-0.412155	-0.216469	3.43851e-14	9.31148e-12
hsa-miR-548k	-0.521433	-1.17218	1.09637e-13	2.45998e-11
hsa-miR-16-5p	-0.407559	9.97691	1.27178e-13	2.45998e-11
hsa-miR-182-5p	-0.323674	12.0085	5.10803e-13	7.85002e-11
hsa-miR-96-5p	-0.53011	3.39963	5.21789e-13	7.85002e-11
hsa-miR-29c-3p	-0.390885	2.54152	6.1018e-13	8.26184e-11
hsa-miR-20a-5p	-0.449843	5.86625	9.26246e-13	1.05802e-10
hsa-miR-26b-5p	-0.42802	8.68246	9.37681e-13	1.05802e-10
hsa-miR-30e-3p	-0.301134	5.75029	1.7021e-12	1.76645e-10
hsa-miR-548bc	-0.541946	-2.87995	1.83215e-12	1.76645e-10
hsa-miR-21-5p	-0.462899	7.32673	1.95692e-12	1.76645e-10
hsa-miR-660-5p	-0.313551	4.33531	4.76548e-12	4.03279e-10
hsa-miR-532-5p	-0.195382	7.73273	1.45595e-11	1.15962e-09
hsa-miR-1976	0.176569	7.46756	1.6302e-11	1.21237e-09
hsa-miR-199a-3p	-0.513633	1.07048	1.74248e-11	1.21237e-09
hsa-miR-199b-3p	-0.513922	1.06535	1.7908e-11	1.21237e-09
hsa-miR-140-5p	-0.375897	0.298238	2.46192e-11	1.58735e-09
hsa-miR-374c-5p	-0.459367	0.637801	2.64498e-11	1.62197e-09
hsa-miR-20b-5p	-0.318038	5.07394	2.75519e-11	1.62197e-09
hsa-miR-548t-3p	-0.283091	1.89605	4.66174e-11	2.63e-09
hsa-miR-548aa	-0.278512	1.91662	8.79971e-11	4.72103e-09
hsa-miR-29b-3p	-0.34126	3.89231	9.0655e-11	4.72103e-09
hsa-miR-454-3p	-0.355597	4.48117	1.06025e-10	5.31697e-09
hsa-miR-598-3p	-0.37283	-0.334177	1.35702e-10	6.38397e-09
hsa-miR-148b-3p	-0.222005	7.03787	1.36732e-10	6.38397e-09
hsa-miR-190a-5p	-0.480307	0.826915	1.99354e-10	8.9975e-09
hsa-miR-4433a-5p	0.349353	2.13848	3.22506e-10	1.40862e-08
hsa-miR-301a-3p	-0.500823	-2.01819	3.3639e-10	1.42335e-08
hsa-miR-450b-5p	-0.508127	-1.93368	3.64091e-10	1.49387e-08
hsa-miR-424-5p	-0.461969	-0.220736	4.13605e-10	1.64712e-08
hsa-miR-374a-5p	-0.531391	1.34581	5.26117e-10	2.03532e-08
hsa-miR-6881-3p	0.172025	3.55797	5.56039e-10	2.09133e-08
hsa-miR-582-5p	-0.462072	-2.388	5.84782e-10	2.13998e-08
hsa-miR-17-5p	-0.302364	6.86104	6.32679e-10	2.25434e-08
hsa-miR-98-5p	-0.296367	4.88718	6.98818e-10	2.42615e-08
hsa-miR-195-5p	-0.343059	-0.862069	8.21821e-10	2.78186e-08
hsa-miR-6885-3p	0.143134	2.92485	8.63077e-10	2.79305e-08
hsa-miR-101-3p	-0.474906	5.87373	8.66383e-10	2.79305e-08
hsa-miR-146b-5p	-0.230487	4.58356	9.76869e-10	3.076e-08
hsa-miR-106a-5p	-0.273873	5.30617	1.02377e-09	3.15041e-08
hsa-miR-23b-3p	-0.159469	8.37365	1.10273e-09	3.318e-08
hsa-miR-144-5p	-0.543002	6.42086	1.25955e-09	3.70747e-08
hsa-miR-324-3p	0.116745	7.21234	1.29467e-09	3.72976e-08
hsa-miR-6826-3p	0.497254	0.540795	1.34721e-09	3.80025e-08
hsa-miR-548d-5p	-0.484006	-0.0270945	1.39642e-09	3.85869e-08
hsa-miR-6802-3p	0.129822	3.16335	1.55299e-09	4.20551e-08
hsa-miR-27b-3p	-0.294581	3.99717	1.81095e-09	4.8079e-08
hsa-let-7f-5p	-0.276138	10.7931	2.00468e-09	5.13439e-08
hsa-miR-6793-3p	0.153589	3.51817	2.01558e-09	5.13439e-08
hsa-miR-10401-3p	0.165843	4.31646	2.04769e-09	5.13439e-08
hsa-miR-374b-5p	-0.398213	5.40625	2.22511e-09	5.47782e-08
hsa-miR-548ay-5p	-0.473532	0.0371806	2.27833e-09	5.50867e-08
hsa-miR-18a-5p	-0.37607	2.90141	2.38268e-09	5.65992e-08
hsa-miR-148a-3p	-0.290346	6.90018	2.57721e-09	6.01646e-08
hsa-miR-215-5p	-0.242789	1.80113	3.56783e-09	8.18787e-08
hsa-miR-548aq-3p	-0.349617	-1.58312	3.90119e-09	8.80368e-08
hsa-miR-362-3p	-0.382485	-0.125661	4.2613e-09	9.4587e-08
hsa-miR-363-3p	-0.250366	8.59661	4.3553e-09	9.51142e-08
hsa-miR-548ad-5p	-0.469392	-0.335855	5.33524e-09	1.14665e-07
hsa-miR-579-3p	-0.443355	-2.57217	5.62564e-09	1.19018e-07
hsa-miR-361-3p	0.117406	7.99713	5.85353e-09	1.21934e-07
hsa-miR-29a-3p	-0.186141	5.12223	6.89356e-09	1.40197e-07
hsa-miR-548ae-5p	-0.481219	-0.574617	6.94095e-09	1.40197e-07
hsa-miR-126-5p	-0.562769	3.34666	7.04093e-09	1.40197e-07
hsa-miR-30e-5p	-0.251626	7.50798	7.7556e-09	1.5219e-07
hsa-miR-6777-3p	0.171012	3.54858	8.57235e-09	1.65814e-07
hsa-miR-19a-3p	-0.380532	2.35204	9.05491e-09	1.72681e-07
hsa-miR-106b-5p	-0.27541	8.20481	1.09944e-08	2.06755e-07
hsa-miR-221-5p	-0.287464	-0.23049	1.17581e-08	2.17157e-07
hsa-miR-20b-3p	-0.305732	-1.19634	1.18683e-08	2.17157e-07
hsa-miR-548b-5p	-0.39708	-2.27541	1.50085e-08	2.67707e-07
hsa-miR-548ae-3p	-0.45219	-3.13655	1.50264e-08	2.67707e-07
hsa-miR-192-5p	-0.19288	8.79404	1.57239e-08	2.74389e-07
hsa-miR-545-5p	-0.413832	-2.40618	1.58067e-08	2.74389e-07
hsa-let-7g-5p	-0.268553	9.71128	1.6348e-08	2.80192e-07
hsa-miR-27a-3p	-0.260744	3.58984	1.68648e-08	2.85437e-07
hsa-miR-126-3p	-0.404359	5.1027	1.80404e-08	3.01564e-07
hsa-miR-532-3p	0.105888	8.41872	1.91705e-08	3.16547e-07
hsa-miR-6741-3p	0.145635	3.16243	1.94593e-08	3.17444e-07
hsa-miR-548e-3p	-0.260878	0.808321	2.13539e-08	3.44205e-07
hsa-miR-5582-3p	-0.345385	-1.55271	2.19985e-08	3.50423e-07
hsa-miR-6859-5p	0.159514	1.12858	2.4706e-08	3.88976e-07
hsa-miR-1238-3p	0.193149	0.166895	2.73231e-08	4.25235e-07
hsa-miR-3615	0.131021	9.96726	2.79564e-08	4.30147e-07
hsa-miR-4646-3p	0.148714	4.64702	2.922e-08	4.44538e-07
hsa-miR-548l	-0.389689	-1.40238	3.36449e-08	5.06169e-07
hsa-miR-6749-3p	0.148447	4.73034	3.43002e-08	5.10357e-07
hsa-miR-6833-3p	0.126605	4.24418	3.55128e-08	5.22655e-07
hsa-miR-196b-5p	-0.315829	1.468	3.6003e-08	5.24173e-07
hsa-miR-6748-3p	0.182002	0.19489	4.06252e-08	5.85176e-07
hsa-miR-33a-3p	-0.474987	-3.33618	4.14804e-08	5.91204e-07
hsa-miR-194-5p	-0.222668	5.45533	4.63757e-08	6.5409e-07
hsa-miR-6729-3p	0.193612	1.52077	5.37866e-08	7.50794e-07
hsa-miR-486-3p	-0.413773	0.609105	6.35645e-08	8.78229e-07
hsa-miR-340-5p	-0.281519	2.79008	7.4184e-08	1.0146e-06
hsa-miR-15b-5p	-0.276546	10.4993	8.11311e-08	1.09851e-06
hsa-miR-30a-3p	-0.318614	-0.126916	9.18022e-08	1.22152e-06
hsa-miR-6859-3p	0.1362	2.01577	9.20202e-08	1.22152e-06
hsa-miR-548d-3p	-0.252028	-0.41519	9.75836e-08	1.2828e-06
hsa-miR-451a	-0.197576	17.2822	9.98253e-08	1.29965e-06
hsa-miR-19b-3p	-0.257797	7.23016	1.24297e-07	1.60284e-06
hsa-miR-548ab	-0.423314	-1.49063	1.52769e-07	1.93497e-06
hsa-miR-548au-5p	-0.403931	-0.739753	1.53929e-07	1.93497e-06
hsa-miR-6511a-3p	0.161404	5.96246	1.5434e-07	1.93497e-06
hsa-miR-32-3p	-0.418611	-2.26694	1.69436e-07	2.10474e-06
hsa-miR-24-2-5p	-0.236573	-0.943596	1.72703e-07	2.12581e-06
hsa-miR-26a-5p	-0.214634	12.0024	1.80349e-07	2.19993e-06
hsa-miR-548av-3p	-0.215544	-0.178244	1.94344e-07	2.32697e-06
hsa-miR-106a-3p	-0.393407	-2.74317	1.95934e-07	2.32697e-06
hsa-miR-147b-5p	-0.51098	-3.70203	1.9734e-07	2.32697e-06
hsa-miR-3127-5p	0.163358	0.405681	1.97637e-07	2.32697e-06
hsa-miR-499a-5p	-0.459402	-3.31233	2.51811e-07	2.92886e-06
hsa-miR-23a-3p	-0.125184	10.2684	2.55151e-07	2.92886e-06
hsa-miR-3127-3p	0.156006	1.63804	2.55248e-07	2.92886e-06
hsa-miR-1229-3p	0.157339	3.68063	3.0034e-07	3.41731e-06
hsa-miR-6750-5p	0.184142	-0.293953	3.26594e-07	3.68507e-06
hsa-miR-6812-3p	0.138821	1.80171	3.30749e-07	3.70111e-06
hsa-miR-6883-3p	0.161288	1.37033	3.4916e-07	3.8751e-06
hsa-miR-628-3p	-0.186963	2.86576	3.66449e-07	4.03391e-06
hsa-miR-548az-5p	-0.364244	-1.01298	3.75189e-07	4.09683e-06
hsa-miR-4660	0.270494	-1.81291	3.86666e-07	4.18836e-06
hsa-miR-548o-3p	-0.181116	2.60758	3.96416e-07	4.2599e-06
hsa-miR-548am-3p	-0.227697	-0.797987	4.12116e-07	4.39374e-06
hsa-miR-6791-3p	0.143377	0.572184	4.414e-07	4.66919e-06
hsa-miR-1227-3p	0.130936	3.56301	5.41762e-07	5.6864e-06
hsa-miR-103a-3p	-0.174666	10.9525	5.87746e-07	6.1216e-06
hsa-miR-18b-5p	-0.347463	-1.22211	6.15874e-07	6.3656e-06
hsa-miR-636	0.110825	5.09078	6.63692e-07	6.80787e-06
hsa-miR-342-5p	0.110854	4.67947	7.19173e-07	7.32151e-06
hsa-miR-6786-3p	0.119241	2.34696	9.74897e-07	9.85083e-06
hsa-miR-6511b-3p	0.14902	5.63994	1.02027e-06	1.02329e-05
hsa-miR-6817-3p	0.159242	1.16605	1.04e-06	1.03541e-05
hsa-miR-4755-5p	0.105895	2.80048	1.20136e-06	1.18733e-05
hsa-miR-548ar-5p	-0.469468	-3.52335	1.27179e-06	1.24669e-05
hsa-miR-3064-3p	-0.247162	-1.15961	1.28878e-06	1.24669e-05
hsa-miR-142-3p	-0.30253	4.88268	1.28905e-06	1.24669e-05
hsa-miR-4728-3p	0.166933	0.428383	1.34353e-06	1.29017e-05
hsa-miR-369-3p	-0.443657	-2.81165	1.45257e-06	1.38505e-05
hsa-miR-423-5p	0.114819	12.7025	1.87288e-06	1.77335e-05
hsa-miR-10399-5p	-0.272697	-0.602409	2.28324e-06	2.13558e-05
hsa-miR-4731-5p	0.179261	-0.319783	2.287e-06	2.13558e-05
hsa-miR-548x-3p	-0.573907	-4.11532	2.32501e-06	2.15621e-05
hsa-miR-484	0.080958	12.9432	2.45125e-06	2.25575e-05
hsa-miR-328-3p	0.111814	8.46517	2.46566e-06	2.25575e-05
hsa-miR-142-5p	-0.223547	9.8938	2.6556e-06	2.41321e-05
hsa-miR-4695-3p	0.172894	0.393805	2.81753e-06	2.54329e-05
hsa-miR-548aj-3p	-0.518506	-3.89289	2.88191e-06	2.58417e-05
hsa-miR-6836-3p	0.149581	0.764879	2.98577e-06	2.6597e-05
hsa-miR-210-5p	0.145999	3.01969	3.06351e-06	2.71111e-05
hsa-miR-451b	-0.206187	-0.405214	3.17295e-06	2.78972e-05
hsa-miR-320b	0.136476	6.95752	3.4647e-06	3.02658e-05
hsa-miR-3942-5p	-0.480078	-3.79077	4.19561e-06	3.64158e-05
hsa-miR-548p	-0.206291	-0.817134	4.41661e-06	3.80898e-05
hsa-miR-548h-5p	-0.422498	-3.45024	4.62437e-06	3.96291e-05
hsa-miR-6511b-5p	0.145613	0.121934	4.84753e-06	4.11311e-05
hsa-miR-450a-5p	-0.279562	0.432884	4.86039e-06	4.11311e-05
hsa-miR-548aj-5p	-0.437357	-3.5016	4.97251e-06	4.18185e-05
hsa-let-7a-3p	-0.247598	3.87113	5.09814e-06	4.26104e-05
hsa-miR-548ak	-0.375498	-2.80611	5.30483e-06	4.40659e-05
hsa-miR-6820-3p	0.106471	1.55349	5.45241e-06	4.50157e-05
hsa-miR-6819-3p	0.130609	1.00808	5.74526e-06	4.71459e-05
hsa-miR-107	-0.178383	8.95475	5.85252e-06	4.77368e-05
hsa-miR-548g-5p	-0.432856	-3.50163	6.13914e-06	4.97748e-05
hsa-miR-143-3p	-0.21878	3.45066	6.18155e-06	4.98203e-05
hsa-miR-548o-5p	-0.356089	-1.66142	6.57821e-06	5.26173e-05
hsa-miR-548c-5p	-0.356058	-1.66168	6.60631e-06	5.26173e-05
hsa-miR-642a-5p	0.175642	0.345254	6.84213e-06	5.41769e-05
hsa-miR-548x-5p	-0.430292	-3.5048	7.1823e-06	5.65397e-05
hsa-miR-548f-5p	-0.43942	-3.56189	7.6081e-06	5.95455e-05
hsa-miR-15a-3p	-0.445557	-3.70052	7.8107e-06	6.05993e-05
hsa-miR-374b-3p	-0.356882	-3.03617	7.83226e-06	6.05993e-05
hsa-miR-185-3p	0.112591	4.51298	7.96508e-06	6.12768e-05
hsa-miR-6721-5p	0.146162	1.57544	8.17233e-06	6.2516e-05
hsa-miR-24-3p	-0.116334	6.4919	8.32797e-06	6.28075e-05
hsa-miR-548am-5p	-0.356797	-1.7222	8.33184e-06	6.28075e-05
hsa-miR-6515-3p	0.13358	0.320838	8.3496e-06	6.28075e-05
hsa-miR-4732-3p	0.102477	8.98195	9.2383e-06	6.91086e-05
hsa-miR-4999-5p	-0.483767	-3.81196	9.9098e-06	7.37245e-05
hsa-miR-628-5p	-0.195388	-0.814864	1.08816e-05	8.05118e-05
hsa-miR-1306-5p	0.136308	7.46111	1.13279e-05	8.33584e-05
hsa-miR-4525	0.349886	-2.69005	1.14425e-05	8.37468e-05
hsa-miR-4784	0.361189	-2.73107	1.25778e-05	9.15611e-05
hsa-miR-4301	0.15901	1.9051	1.30503e-05	9.44925e-05
hsa-miR-106b-3p	-0.122512	9.41437	1.66771e-05	0.0001193
hsa-miR-4646-5p	0.208657	-0.733936	1.67328e-05	0.0001193
hsa-miR-7155-3p	0.113842	1.28249	1.67408e-05	0.0001193
hsa-miR-379-5p	-0.339573	-2.79652	1.68848e-05	0.000119696
hsa-miR-6813-3p	0.181171	-0.759696	1.7852e-05	0.000125894
hsa-miR-3912-3p	-0.573403	-4.11195	1.81254e-05	0.00012716
hsa-miR-651-5p	-0.396127	-3.16108	1.82675e-05	0.000127496
hsa-miR-6882-3p	0.162129	0.809668	1.97424e-05	0.000137083
hsa-miR-548ah-3p	-0.183019	-0.546929	2.06662e-05	0.000142766
hsa-miR-99a-5p	-0.157069	4.40625	2.23036e-05	0.000153295
hsa-miR-421	-0.122273	5.00565	2.39056e-05	0.000163475
hsa-miR-937-3p	0.123953	2.14631	2.52468e-05	0.00017178
hsa-miR-561-5p	-0.590666	-4.18108	2.69102e-05	0.000182182
hsa-miR-3688-5p	-0.469203	-4.07078	2.73232e-05	0.000184057
hsa-miR-6787-3p	0.199777	-1.52836	2.80414e-05	0.000187961
hsa-miR-9985	-0.43281	-3.69736	2.91822e-05	0.000194644
hsa-miR-7-5p	-0.204247	5.41634	2.94205e-05	0.000195272
hsa-miR-132-3p	-0.119091	4.43922	3.04198e-05	0.000200919
hsa-miR-6803-3p	0.141644	7.09309	3.07632e-05	0.000202201
hsa-miR-6842-3p	0.114558	3.55459	3.16227e-05	0.000206846
hsa-miR-4637	-0.285954	-2.35291	3.2375e-05	0.000210749
hsa-miR-3620-3p	0.115139	3.6337	3.79723e-05	0.000246002
hsa-miR-320a-3p	0.122704	12.5805	3.81733e-05	0.000246127
hsa-miR-6743-3p	0.142756	1.7035	3.84163e-05	0.00024652
hsa-miR-4423-3p	-0.60308	-4.19964	3.88621e-05	0.000248204
hsa-miR-5193	0.122426	0.657025	4.11131e-05	0.000261256
hsa-miR-1233-3p	0.141026	-0.0603234	4.12916e-05	0.000261256
hsa-miR-6804-3p	0.147131	-0.261959	4.18872e-05	0.000263792
hsa-miR-3140-5p	-0.218523	-1.65521	4.28331e-05	0.0002685
hsa-miR-3605-3p	0.0995398	6.42385	4.6411e-05	0.000289588
hsa-miR-135a-5p	-0.250503	-1.60261	4.86371e-05	0.000302085
hsa-miR-320e	0.149689	3.23885	4.97273e-05	0.000307087
hsa-miR-197-3p	0.0969486	8.1144	4.98959e-05	0.000307087
hsa-miR-570-3p	-0.287224	-2.40392	5.05109e-05	0.000309465
hsa-miR-548j-5p	-0.2513	-0.780523	5.26896e-05	0.000321359
hsa-miR-641	-0.139054	2.24215	5.4301e-05	0.000329702
hsa-miR-29a-5p	-0.293992	-3.10567	5.79166e-05	0.000349438
hsa-miR-199b-5p	-0.210421	0.376866	5.80675e-05	0.000349438
hsa-miR-6783-3p	0.133206	2.48101	6.28605e-05	0.000376606
hsa-miR-939-5p	0.136753	1.60226	6.44408e-05	0.000384374
hsa-miR-23c	-0.160384	-0.154252	6.55484e-05	0.000389265
hsa-miR-320c	0.13123	4.94231	6.59336e-05	0.000389843
hsa-miR-6734-3p	0.107778	4.05696	6.74018e-05	0.000396792
hsa-miR-23a-5p	0.117862	0.827908	7.10106e-05	0.000416227
hsa-miR-135a-2-3p	-0.379769	-3.69397	7.23818e-05	0.000422435
hsa-let-7f-2-3p	-0.285466	-2.39941	7.28847e-05	0.000423545
hsa-miR-6798-3p	0.126837	1.55071	7.56263e-05	0.000436973
hsa-miR-5003-5p	-0.488679	-4.09006	7.5841e-05	0.000436973
hsa-miR-3138	0.171279	-0.448873	7.62478e-05	0.000437456
hsa-miR-20a-3p	-0.293975	-2.82012	7.85312e-05	0.000447345
hsa-miR-1285-5p	0.0827899	3.6456	7.86323e-05	0.000447345
hsa-miR-506-3p	-0.480464	-4.00439	8.42184e-05	0.00047712
hsa-miR-6855-5p	0.156017	0.0610102	8.63369e-05	0.000485267
hsa-miR-6879-3p	0.11206	1.41961	8.63732e-05	0.000485267
hsa-miR-7-1-3p	-0.14933	3.45928	8.68285e-05	0.000485809
hsa-miR-548ac	-0.195329	-1.17815	8.97002e-05	0.000499811
hsa-miR-15b-3p	-0.137478	7.61367	9.05936e-05	0.00050272
hsa-miR-3691-5p	0.116962	0.547827	9.28838e-05	0.000513325
hsa-miR-6726-3p	0.126791	4.58676	9.90301e-05	0.000545068
hsa-miR-2110	0.102351	6.27812	9.95865e-05	0.000545911
hsa-miR-3135a	-0.176003	-0.608633	0.00010342	0.000564642
hsa-miR-3944-3p	0.197551	-1.84731	0.000104375	0.000567564
hsa-miR-130a-3p	-0.147913	3.90132	0.000106614	0.000575926
hsa-miR-19b-1-5p	-0.289131	-3.00774	0.000106763	0.000575926
hsa-miR-6845-3p	0.200394	-1.64723	0.000110727	0.000589044
hsa-miR-26a-2-3p	-0.223439	-0.0681558	0.000110848	0.000589044
hsa-miR-4667-5p	0.181339	-1.38392	0.00011091	0.000589044
hsa-miR-17-3p	-0.130174	3.9461	0.000110935	0.000589044
hsa-miR-1827	-0.303622	-3.65462	0.000130989	0.000690251
hsa-miR-4667-3p	0.183844	-1.5176	0.000131015	0.000690251
hsa-miR-4763-5p	0.172345	-0.953347	0.000131855	0.000691981
hsa-miR-548w	-0.431806	-3.88158	0.000133791	0.000699435
hsa-miR-502-5p	-0.127244	1.48527	0.000138321	0.000720334
hsa-miR-629-3p	0.0914969	1.99249	0.000140456	0.000728651
hsa-miR-6771-3p	0.29516	-3.09651	0.000143095	0.000739505
hsa-miR-4775	-0.326913	-3.29559	0.000148652	0.000765306
hsa-miR-643	-0.248121	-1.61463	0.000152985	0.000784627
hsa-miR-485-3p	0.198873	4.53807	0.000165512	0.000845674
hsa-miR-3150a-5p	0.0950754	1.03807	0.000168266	0.000856513
hsa-miR-6516-5p	-0.207452	-1.74659	0.000171658	0.000870505
hsa-miR-6754-3p	0.130901	0.272103	0.000172676	0.000872401
hsa-miR-877-3p	0.105591	2.22346	0.000181544	0.000913793
hsa-miR-766-3p	0.0847066	4.00227	0.000192212	0.000963907
hsa-miR-548ap-3p	-0.368092	-3.7083	0.00019718	0.000984841
hsa-miR-3688-3p	-0.121772	2.05184	0.000198128	0.000984841
hsa-miR-4286	0.0898135	5.00873	0.000198568	0.000984841
hsa-miR-6766-3p	0.109552	0.778617	0.000214151	0.00105825
hsa-miR-202-5p	-0.271137	-0.847273	0.000216424	0.00106559
hsa-miR-7854-3p	0.156209	-1.10268	0.000220229	0.0010804
hsa-miR-1343-3p	0.122039	2.02538	0.000236008	0.00115363
hsa-miR-542-3p	-0.345251	-3.51749	0.000241348	0.00117548
hsa-miR-7114-3p	0.304062	-3.32782	0.000244604	0.00118708
hsa-miR-127-5p	-0.40461	-3.87816	0.0002618	0.00126599
hsa-miR-200b-3p	-0.257235	-2.03822	0.000263955	0.00127187
hsa-miR-342-3p	0.0705363	8.32619	0.00026554	0.00127497
hsa-miR-4685-3p	0.106029	7.23841	0.000288157	0.00137867
hsa-miR-4659b-5p	-0.17202	-0.433102	0.000296006	0.00141124
hsa-miR-301a-5p	-0.202576	-1.85904	0.000301333	0.0014316
hsa-miR-98-3p	-0.236968	-0.863625	0.000305766	0.00144758
hsa-miR-186-3p	-0.260322	-2.86799	0.000310702	0.00146582
hsa-miR-7113-3p	0.136529	-0.301478	0.000313021	0.00147163
hsa-miR-150-5p	0.0810359	11.1436	0.000316534	0.001483
hsa-miR-412-3p	0.407174	-3.47758	0.000327946	0.00152674
hsa-miR-4504	-0.241212	-2.50321	0.000328126	0.00152674
hsa-miR-6877-5p	0.122214	0.328081	0.000331047	0.00153506
hsa-miR-520g-3p	0.611292	-4.17969	0.000350307	0.00161882
hsa-miR-4796-5p	-0.285716	-3.20076	0.000384896	0.00177262
hsa-miR-338-5p	-0.156363	0.463613	0.000409448	0.0018793
hsa-miR-9-3p	-0.209236	-1.8989	0.00041996	0.00192103
hsa-miR-197-5p	0.188621	-1.34281	0.000439345	0.00200294
hsa-miR-3683	-0.490643	-4.20412	0.000451354	0.00205078
hsa-miR-548al	-0.222405	-2.40039	0.000457619	0.00207229
hsa-miR-6508-3p	-0.215985	-2.52465	0.000472413	0.00213216
hsa-miR-6797-3p	0.132192	-0.566067	0.000474435	0.00213417
hsa-miR-6753-5p	0.433353	-3.91798	0.000496346	0.00222534
hsa-miR-4745-3p	0.112635	0.388123	0.000520072	0.00232402
hsa-let-7e-5p	-0.129145	5.62394	0.000531069	0.00236535
hsa-miR-1179	-0.17867	-0.958316	0.000534415	0.00237245
hsa-miR-584-3p	0.104946	1.86206	0.000558804	0.00246891
hsa-miR-3157-5p	-0.112283	0.578449	0.000559791	0.00246891
hsa-miR-4510	-0.216901	-3.04115	0.000573878	0.00252283
hsa-miR-1908-5p	0.12442	3.16537	0.000579346	0.00253862
hsa-miR-3173-5p	0.0903662	6.46493	0.000616779	0.00269393
hsa-miR-139-3p	0.153972	-0.600823	0.000661159	0.00287849
hsa-miR-7706	0.0902068	4.13283	0.000668221	0.00289991
hsa-miR-6750-3p	0.0992643	1.49433	0.000691484	0.00299127
hsa-miR-1287-3p	-0.298843	-3.41809	0.000718039	0.00309626
hsa-miR-671-3p	0.0886308	2.80124	0.000725121	0.00311687
hsa-miR-1273h-3p	0.0875185	1.52229	0.00076282	0.00326854
hsa-miR-146a-3p	-0.313749	-2.76045	0.000784903	0.00335255
hsa-miR-548bb-3p	-0.39478	-4.05371	0.000799546	0.00340435
hsa-miR-148b-5p	-0.154959	-0.185045	0.000820473	0.00348251
hsa-miR-454-5p	-0.101495	5.64918	0.000895557	0.00377798
hsa-miR-6809-3p	0.222984	-2.4948	0.000895665	0.00377798
hsa-miR-6730-3p	0.121381	-0.0881248	0.000920253	0.00386963
hsa-miR-3128	-0.15566	-0.690868	0.000954079	0.00399945
hsa-miR-320d	0.104982	3.56514	0.000970264	0.00405475
hsa-miR-6747-3p	0.101869	5.112	0.00101337	0.00422186
hsa-miR-3192-5p	0.216289	-2.30222	0.00102293	0.00423862
hsa-miR-133a-3p	0.195396	1.79699	0.00102366	0.00423862
hsa-miR-503-5p	-0.110263	5.01765	0.00103996	0.00429302
hsa-miR-548c-3p	-0.217261	-2.7052	0.00106269	0.0043735
hsa-miR-181b-3p	-0.382851	-4.02748	0.00106996	0.00439009
hsa-miR-3944-5p	0.091457	0.888018	0.00107371	0.00439214
hsa-miR-6818-5p	-0.157601	-1.63399	0.0010821	0.00441313
hsa-miR-7848-3p	0.161402	-1.51379	0.00109332	0.00444551
hsa-miR-6866-3p	0.0832443	0.974851	0.00111023	0.00450076
hsa-miR-32-5p	-0.940847	-1.69932	0.00113882	0.00460286
hsa-miR-3180-5p	0.155959	-1.01496	0.0012071	0.00486432
hsa-miR-486-5p	0.080667	19.0188	0.00125734	0.00504104
hsa-miR-6782-3p	0.0823317	0.738785	0.0012584	0.00504104
hsa-miR-4454	-0.0878407	5.0208	0.0012651	0.00505144
hsa-miR-11400	-0.185854	-1.13987	0.00126846	0.00505144
hsa-miR-3684	-0.306661	-3.62013	0.00127493	0.00506234
hsa-miR-129-5p	0.174177	-1.65038	0.00129667	0.00512665
hsa-miR-5094	-0.129184	-0.0886374	0.0012987	0.00512665
hsa-miR-4497	-0.19089	-0.74369	0.00130363	0.00513116
hsa-miR-378a-5p	0.0918276	5.82332	0.00135198	0.00530604
hsa-miR-1284	-0.0991668	2.53433	0.00135803	0.00530945
hsa-let-7a-5p	-0.116448	12.9532	0.00136119	0.00530945
hsa-miR-1299	0.400751	1.98143	0.00136461	0.00530945
hsa-miR-4677-3p	-0.12046	1.46222	0.00138112	0.00535827
hsa-miR-6134	-0.196459	-3.03643	0.00141461	0.00547253
hsa-miR-5187-5p	0.185399	-1.99437	0.00142004	0.00547788
hsa-miR-7106-3p	0.129272	-1.03165	0.00142628	0.00548631
hsa-miR-6885-5p	0.13197	-0.807894	0.00150661	0.00577889
hsa-miR-4723-3p	0.136091	-0.909522	0.0015195	0.00581189
hsa-miR-6894-3p	0.0837466	2.93558	0.00164956	0.00628885
hsa-miR-4677-5p	-0.183061	-2.0405	0.00165349	0.00628885
hsa-miR-145-5p	0.0855076	5.12386	0.00166301	0.00630731
hsa-miR-376c-3p	-0.209776	-1.97992	0.00168206	0.00636174
hsa-miR-494-5p	0.339411	-3.78034	0.00168948	0.00637202
hsa-miR-548e-5p	-0.196879	-2.6001	0.00172902	0.00650303
hsa-miR-196a-5p	-0.289207	-2.49417	0.00180353	0.00676448
hsa-miR-520h	0.550253	-4.24042	0.00185398	0.00693451
hsa-miR-4443	-0.132585	2.99517	0.00187266	0.00697102
hsa-miR-4685-5p	0.405392	-3.99061	0.00187404	0.00697102
hsa-miR-652-5p	-0.205468	-2.10462	0.00198683	0.00737031
hsa-miR-7111-3p	0.135639	-1.02739	0.00200514	0.00739821
hsa-miR-6837-3p	0.116822	-0.951487	0.00200527	0.00739821
hsa-miR-101-5p	-0.227599	-2.11666	0.00201178	0.00740205
hsa-miR-30b-5p	-0.107671	9.0043	0.00202401	0.00742686
hsa-miR-1237-3p	0.117958	-0.548706	0.00205804	0.0075313
hsa-miR-6889-3p	0.116191	-0.746989	0.00207635	0.00757783
hsa-miR-338-3p	-0.221901	-2.765	0.00208405	0.00758549
hsa-let-7d-5p	-0.0956431	10.1206	0.00220214	0.00799384
hsa-miR-548n	-0.399056	-4.14963	0.002218	0.00802987
hsa-miR-574-3p	0.0627961	6.88557	0.00231773	0.00836855
hsa-miR-3199	-0.122082	-1.05013	0.00256157	0.0092086
hsa-miR-6825-3p	0.210152	-2.72397	0.00256591	0.0092086
hsa-miR-181c-5p	-0.131477	-0.159066	0.00257079	0.0092086
hsa-miR-548ai	-0.406935	-4.15537	0.00261774	0.00934466
hsa-miR-570-5p	-0.406768	-4.15515	0.00262258	0.00934466
hsa-miR-9-5p	-0.218187	-1.74606	0.00274979	0.00977223
hsa-miR-548s	-0.257128	-3.39362	0.00279093	0.00989247
hsa-miR-4676-5p	0.102837	-0.646723	0.00281861	0.0099645
hsa-miR-4749-3p	0.114668	-0.0687639	0.00291918	0.0102931
hsa-miR-409-3p	0.149134	5.44544	0.00297784	0.0104727
hsa-miR-29b-2-5p	-0.0901748	4.36198	0.00299286	0.0104983
hsa-miR-3934-5p	-0.188405	-2.17582	0.00302696	0.0105905
hsa-miR-1226-3p	0.0715734	4.12952	0.0030399	0.010593
hsa-miR-6887-3p	0.186204	-2.05273	0.00304724	0.010593
hsa-miR-6511a-5p	0.159822	-1.97419	0.00305116	0.010593
hsa-miR-192-3p	-0.146127	-0.570886	0.00307018	0.0106318
hsa-miR-3691-3p	0.106549	-0.544847	0.00310437	0.0107227
hsa-miR-582-3p	-0.220736	-3.0172	0.00313726	0.0108088
hsa-miR-4433b-5p	0.136887	6.31044	0.00323072	0.0111025
hsa-miR-4732-5p	0.0870512	5.64955	0.00324125	0.0111105
hsa-miR-30d-3p	-0.172604	-1.78436	0.00329641	0.0112711
hsa-miR-129-1-3p	0.145065	-1.30047	0.00334994	0.0114253
hsa-miR-6755-3p	-0.156525	-1.86441	0.00342709	0.011659
hsa-miR-508-3p	-0.300386	-3.65999	0.00346343	0.0117531
hsa-miR-152-3p	-0.102221	1.72563	0.00354539	0.0120011
hsa-miR-708-5p	-0.254666	-2.87708	0.0036471	0.0123147
hsa-miR-4754	0.165941	-2.16004	0.00367465	0.0123768
hsa-miR-3690	0.204385	-1.55657	0.00371976	0.0124976
hsa-miR-493-5p	-0.202778	-0.566523	0.00374579	0.012554
hsa-miR-556-3p	-0.249183	-3.13318	0.00378778	0.0126634
hsa-miR-1295a	0.411162	-3.81684	0.00380817	0.0127002
hsa-let-7i-5p	-0.125219	9.63183	0.00388577	0.0129257
hsa-miR-590-5p	-0.278031	-3.65144	0.00389489	0.0129257
hsa-miR-376a-3p	-0.183188	-1.35925	0.00391716	0.0129678
hsa-miR-618	0.117447	2.16078	0.00410743	0.0135645
hsa-let-7f-1-3p	-0.122775	2.21684	0.00412465	0.0135883
hsa-miR-3187-3p	0.0813449	1.98152	0.00419585	0.0137893
hsa-miR-3150a-3p	0.132141	-1.47855	0.00426326	0.0139769
hsa-miR-6514-5p	0.0772791	0.295119	0.00429952	0.0140617
hsa-miR-548at-5p	-0.165056	-0.346016	0.00438332	0.0143012
hsa-miR-193a-3p	-0.182283	-2.27574	0.00439986	0.0143207
hsa-miR-10a-5p	-0.111623	5.74217	0.00450884	0.0146402
hsa-miR-335-5p	-0.134182	2.5741	0.00467566	0.0151456
hsa-miR-3140-3p	-0.101828	0.620803	0.00486845	0.0157324
hsa-miR-6865-3p	0.169333	-2.0928	0.00489641	0.0157851
hsa-miR-6825-5p	-0.241343	-2.49285	0.00494327	0.0158983
hsa-miR-6880-3p	0.224889	-3.15829	0.00496939	0.0159444
hsa-miR-664b-3p	0.0620923	3.0129	0.00517158	0.0165539
hsa-miR-7110-3p	0.123787	-0.242958	0.00528441	0.0168752
hsa-miR-3160-3p	-0.228434	-3.35549	0.0053176	0.0169412
hsa-miR-6858-3p	0.18769	-2.38771	0.00557897	0.0177083
hsa-miR-5010-5p	0.122186	1.92493	0.00558452	0.0177083
hsa-miR-548ay-3p	-0.0991264	1.44579	0.00566715	0.0179283
hsa-miR-183-3p	-0.0919553	4.9226	0.00575271	0.0181123
hsa-miR-1234-3p	0.0848474	1.36112	0.00575777	0.0181123
hsa-miR-1270	0.100974	3.32138	0.00576544	0.0181123
hsa-miR-6824-3p	0.247222	-3.40989	0.00579395	0.0181598
hsa-miR-5010-3p	0.0557949	6.35751	0.00597346	0.0186656
hsa-miR-1-3p	-0.263898	-3.12714	0.00598292	0.0186656
hsa-miR-539-5p	-0.216978	-2.93938	0.00610064	0.0189891
hsa-miR-412-5p	-0.311503	-3.79695	0.00613822	0.0190623
hsa-miR-6801-3p	0.236679	-3.24478	0.00615342	0.0190657
hsa-miR-25-3p	-0.0881137	12.9223	0.00621937	0.0192261
hsa-miR-224-5p	-0.161099	0.0583628	0.00626314	0.0193173
hsa-miR-3120-5p	0.272995	-3.6224	0.00638316	0.0196427
hsa-miR-627-5p	-0.150899	-1.74519	0.00659858	0.0202596
hsa-miR-4639-3p	0.138225	-1.89127	0.00674606	0.0206655
hsa-miR-4742-5p	-0.131957	-1.11574	0.0069445	0.0212254
hsa-miR-92b-5p	0.0965974	1.96177	0.0071433	0.0217838
hsa-miR-6857-3p	0.0762605	0.600255	0.0073075	0.0222345
hsa-miR-4772-3p	0.141987	1.92202	0.00734885	0.0223102
hsa-miR-3605-5p	0.0999086	0.18628	0.00737764	0.0223475
hsa-miR-7855-5p	0.0915043	0.361464	0.00758469	0.0229234
hsa-miR-607	-0.24586	-3.53422	0.00807708	0.0243572
hsa-miR-10a-3p	-0.238541	-3.48357	0.00831721	0.0250256
hsa-miR-519a-5p	0.422918	-4.16824	0.00864637	0.0259583
hsa-miR-6780b-3p	0.0854429	-0.126858	0.00866662	0.0259615
hsa-miR-4511	-0.077421	1.5865	0.00871025	0.0260346
hsa-miR-1271-5p	-0.0843906	2.48223	0.00879432	0.026228
hsa-miR-3682-5p	-0.272328	-3.8401	0.00891536	0.0264939
hsa-miR-125a-5p	0.0699859	7.76939	0.00892263	0.0264939
hsa-miR-6796-3p	0.227916	-3.11473	0.00898346	0.0266162
hsa-miR-452-5p	-0.178316	-2.42389	0.00905243	0.026762
hsa-miR-93-5p	-0.102645	10.4129	0.00936125	0.0276147
hsa-miR-6514-3p	0.063455	1.98693	0.0098139	0.028887
hsa-miR-1236-3p	0.081025	0.105467	0.00990581	0.0290723
hsa-miR-4750-3p	0.26069	-3.82064	0.00991979	0.0290723
hsa-miR-4766-3p	-0.274484	-3.86874	0.0100444	0.029311
hsa-miR-6810-5p	0.231099	-3.37439	0.0100445	0.029311
hsa-miR-3680-5p	-0.222051	-3.46937	0.0100826	0.0293587
hsa-miR-6798-5p	0.37481	-4.20581	0.0101045	0.0293593
hsa-miR-4632-3p	0.130777	-1.28786	0.0102911	0.0298376
hsa-miR-548ar-3p	-0.286283	-3.74447	0.0103613	0.029977
hsa-miR-3074-5p	0.0645302	2.3253	0.0107466	0.0310253
hsa-miR-5583-3p	-0.230612	-3.44406	0.0109847	0.03159
hsa-miR-548an	-0.228027	-3.5166	0.0109888	0.03159
hsa-miR-6780a-5p	0.105012	0.296232	0.0111466	0.0319255
hsa-miR-664b-5p	0.107982	-0.948537	0.0111527	0.0319255
hsa-miR-7109-3p	0.0870989	-0.257392	0.0112818	0.0322268
hsa-miR-3619-5p	-0.244692	-3.67261	0.0113135	0.0322494
hsa-miR-4687-5p	0.0943333	-0.0735835	0.0114356	0.0325291
hsa-miR-132-5p	-0.0933108	-0.00983856	0.0116309	0.0330152
hsa-miR-1275	0.0827017	1.56933	0.0118637	0.0336055
hsa-miR-6775-3p	0.0755682	0.902855	0.0122373	0.0345914
hsa-miR-548aw	-0.2292	-3.58066	0.0124706	0.0351776
hsa-miR-6799-3p	0.0950617	0.0575068	0.0126961	0.0357392
hsa-miR-95-3p	-0.188423	-2.80599	0.0127709	0.035875
hsa-miR-6806-3p	0.0851881	1.44195	0.0129183	0.0362139
hsa-miR-3122	0.162168	-2.73608	0.0129596	0.0362547
hsa-let-7c-5p	-0.0771937	5.86032	0.0135782	0.0378341
hsa-miR-1261	-0.131481	-1.63212	0.0136055	0.0378341
hsa-miR-3117-3p	-0.182821	-2.58501	0.013608	0.0378341
hsa-miR-4429	0.107092	-0.748176	0.0138436	0.0384102
hsa-miR-3165	-0.149648	-2.50672	0.0139795	0.0387079
hsa-miR-6503-3p	-0.126928	-2.02681	0.0143005	0.0395161
hsa-miR-6796-5p	0.263541	-3.70794	0.0145126	0.0400206
hsa-miR-6861-5p	0.238737	-3.56718	0.0147409	0.0405642
hsa-miR-18a-3p	0.0422723	7.92054	0.0147697	0.0405642
hsa-miR-187-3p	0.334112	-4.14904	0.0148339	0.0406581
hsa-miR-3174	-0.180857	-3.17742	0.0151597	0.0414672
hsa-miR-942-3p	0.0683825	1.81794	0.0153786	0.0419811
hsa-miR-6762-3p	0.0881415	-0.155308	0.0155715	0.0424221
hsa-miR-6730-5p	0.208543	-3.15247	0.0156436	0.042533
hsa-miR-642b-5p	0.12598	-1.44918	0.0157298	0.0426816
hsa-miR-655-3p	-0.189905	-2.68761	0.0157987	0.0427828
hsa-miR-4306	-0.0736818	1.26181	0.0158953	0.0429586
hsa-miR-491-3p	-0.146164	-2.28545	0.0159603	0.0430482
hsa-miR-10b-5p	-0.110534	1.28242	0.0163186	0.0439272
hsa-miR-6767-3p	0.157493	-2.66466	0.0165239	0.0443279
hsa-miR-4662a-5p	-0.16702	-2.09136	0.0165329	0.0443279
hsa-miR-1538	0.0682169	1.17189	0.0166312	0.0445031
hsa-miR-425-3p	-0.0462426	4.88658	0.0169779	0.0453414
hsa-miR-124-3p	-0.358124	-4.21922	0.0171029	0.0455853
hsa-miR-6759-5p	0.304964	-4.06024	0.0172305	0.0458352
hsa-miR-513c-5p	-0.257403	-3.78128	0.0177772	0.0471578
hsa-miR-1468-5p	0.0729674	2.38069	0.0178303	0.0471578
hsa-miR-548a-3p	-0.180864	-3.10666	0.0178322	0.0471578
hsa-miR-6737-3p	0.0838664	-0.571464	0.0182087	0.0480597
hsa-miR-1236-5p	0.223634	-3.55313	0.0185142	0.0487192
hsa-miR-1291	-0.179437	-2.98553	0.0185306	0.0487192
hsa-miR-193a-5p	0.070597	4.45524	0.0187681	0.0492482
hsa-miR-223-5p	-0.136622	-0.13601	0.0190028	0.0497676
hsa-miR-500a-5p	-0.0498513	5.34391	0.0192073	0.0502058
hsa-miR-365b-5p	0.128885	-1.96716	0.0193399	0.0504551
hsa-miR-1228-3p	0.110584	-0.297777	0.0199898	0.0520505
hsa-miR-181c-3p	-0.105801	-1.00647	0.0201449	0.0523535
hsa-miR-485-5p	0.135862	-0.542735	0.0204437	0.0530284
hsa-miR-6740-3p	0.153701	-2.84117	0.0205749	0.0532666
hsa-miR-6727-3p	0.0978543	-0.859726	0.0207973	0.0537396
hsa-miR-3130-3p	-0.149184	-2.59771	0.0209332	0.0539877
hsa-miR-3192-3p	0.136579	-2.26893	0.0210613	0.0542149
hsa-miR-3136-5p	-0.147785	-2.59352	0.0212115	0.0543117
hsa-miR-140-3p	-0.0552946	11.36	0.0212186	0.0543117
hsa-miR-16-1-3p	-0.241264	-3.71649	0.0212193	0.0543117
hsa-miR-1273h-5p	0.1015	-1.23901	0.021303	0.0544231
hsa-miR-605-3p	-0.282623	-4.02859	0.0214541	0.0545777
hsa-miR-8485	-0.125001	-1.25241	0.0214785	0.0545777
hsa-miR-28-5p	-0.0662458	4.27717	0.0215318	0.0545777
hsa-miR-6784-3p	0.221017	-3.65932	0.0215467	0.0545777
hsa-miR-4642	0.312944	-4.08597	0.021565	0.0545777
hsa-miR-3182	-0.213737	-3.7915	0.0217991	0.0549696
hsa-miR-6886-3p	0.149813	-2.21227	0.0218011	0.0549696
hsa-miR-6838-3p	0.261953	-3.94049	0.0219172	0.0551265
hsa-miR-3159	-0.291021	-4.09703	0.0219447	0.0551265
hsa-miR-21-3p	-0.119499	-1.6372	0.0220472	0.0552813
hsa-miR-222-3p	-0.0638398	5.9013	0.0221733	0.0554946
hsa-miR-3074-3p	-0.127613	-2.01489	0.0223933	0.0559418
hsa-miR-6742-5p	-0.198145	-3.47704	0.0224806	0.0560261
hsa-miR-500b-5p	-0.0490443	5.24287	0.0225097	0.0560261
hsa-miR-4723-5p	0.0899702	-1.00477	0.0228425	0.0567501
hsa-miR-6842-5p	0.10825	-1.58848	0.0230111	0.0570643
hsa-miR-130b-3p	-0.0549146	5.71272	0.0231978	0.0574219
hsa-miR-3150b-3p	0.118866	-1.73355	0.0237527	0.0586882
hsa-miR-122-5p	-0.146869	0.892592	0.0241812	0.0596381
hsa-miR-362-5p	-0.0629211	5.89672	0.0246402	0.0606598
hsa-miR-3675-3p	0.197605	-2.38373	0.0252478	0.0620428
hsa-miR-3150b-5p	0.137436	-2.53522	0.0256147	0.0628302
hsa-miR-331-5p	-0.0727561	2.34385	0.0256734	0.0628604
hsa-miR-4524a-3p	-0.254758	-3.85301	0.0261156	0.0638277
hsa-miR-4466	0.201279	-3.31853	0.0266215	0.0649468
hsa-miR-130a-5p	-0.103813	-0.273034	0.02672	0.0650401
hsa-miR-487b-3p	-0.119578	0.931333	0.0267558	0.0650401
hsa-miR-6826-5p	0.167073	-2.56432	0.027504	0.0666434
hsa-miR-559	-0.232714	-3.77239	0.0275138	0.0666434
hsa-miR-6861-3p	0.0776986	-0.433999	0.028116	0.0679804
hsa-miR-659-5p	0.112016	-1.71679	0.0286113	0.0690548
hsa-miR-548ap-5p	-0.263839	-3.95243	0.0287309	0.069119
hsa-miR-5695	-0.0892308	1.72633	0.02874	0.069119
hsa-miR-5090	0.0855889	-0.12459	0.0293784	0.0704878
hsa-miR-433-3p	0.119907	1.2741	0.0294133	0.0704878
hsa-miR-340-3p	-0.0762412	5.75232	0.0297494	0.0711674
hsa-miR-496	-0.173654	-2.65237	0.0298537	0.0712907
hsa-miR-3175	0.201659	-3.49824	0.0299667	0.0714347
hsa-miR-517a-3p	0.263346	-3.08988	0.0303013	0.0719569
hsa-miR-517b-3p	0.263346	-3.08988	0.0303013	0.0719569
hsa-miR-4796-3p	-0.237371	-3.88471	0.0303452	0.0719569
hsa-miR-6769b-3p	0.0847478	-0.77872	0.0306731	0.0726072
hsa-miR-4753-5p	0.0691291	0.54956	0.0311883	0.0736979
hsa-miR-410-3p	-0.225554	-3.69965	0.0313252	0.0738925
hsa-miR-6735-5p	0.0589081	1.59137	0.0314057	0.0739535
hsa-miR-4647	0.172724	-3.16704	0.0315107	0.074072
hsa-miR-34b-3p	0.148838	-2.71315	0.0321007	0.0753281
hsa-miR-3928-3p	0.0564701	1.02254	0.0323132	0.0756956
hsa-let-7g-3p	-0.151804	-2.93789	0.0332495	0.0777545
hsa-miR-4654	0.314813	-4.22618	0.0335508	0.0783238
hsa-miR-495-3p	-0.1163	1.31752	0.0343013	0.079938
hsa-miR-6807-5p	0.135459	-2.64556	0.0344293	0.0800985
hsa-miR-668-3p	0.144781	-2.14987	0.0350931	0.0815028
hsa-miR-369-5p	-0.199013	-3.49857	0.0352997	0.0818422
hsa-miR-188-5p	-0.0793171	-0.0430127	0.0355297	0.0822346
hsa-miR-3065-5p	-0.163406	-3.2127	0.0357232	0.0824797
hsa-miR-1303	0.0789774	3.12659	0.0357574	0.0824797
hsa-miR-4638-5p	0.176457	-3.43729	0.036057	0.0829098
hsa-miR-6832-3p	0.0942579	-1.53865	0.0361087	0.0829098
hsa-miR-155-5p	-0.0607234	4.38908	0.0361276	0.0829098
hsa-miR-937-5p	-0.288809	-4.17819	0.0362858	0.083132
hsa-miR-4433b-3p	-0.154243	-2.2765	0.0369155	0.0844318
hsa-miR-423-3p	0.0467017	10.6652	0.0371898	0.0849156
hsa-miR-7976	-0.0612588	4.12226	0.0372587	0.0849297
hsa-miR-500a-3p	-0.0550769	6.77818	0.038423	0.0874366
hsa-miR-4757-3p	-0.149609	-3.03308	0.0391231	0.0888203
hsa-miR-1307-5p	-0.0807524	0.657391	0.0391623	0.0888203
hsa-miR-4700-5p	0.287912	-4.09966	0.0392817	0.0889422
hsa-miR-10392-5p	0.213572	-3.6736	0.0398351	0.0900446
hsa-miR-18b-3p	0.0459946	4.31587	0.0400554	0.0903916
hsa-miR-7151-5p	0.281953	-4.15706	0.0401453	0.0904437
hsa-miR-548j-3p	-0.245422	-4.02125	0.0408855	0.0919584
hsa-miR-2277-3p	0.0765508	-0.443364	0.0410547	0.0921858
hsa-miR-487a-5p	0.144653	-2.19304	0.0417346	0.0934461
hsa-miR-574-5p	0.0963747	3.51391	0.0418057	0.0934461
hsa-miR-449b-3p	0.228957	-3.91264	0.041823	0.0934461
hsa-miR-4785	-0.102758	-1.44856	0.0419442	0.0935625
hsa-miR-149-5p	-0.0959452	-0.451492	0.0427249	0.0951472
hsa-miR-1537-3p	-0.253659	-4.09804	0.0428741	0.0953227
hsa-miR-3198	0.130892	-2.67319	0.044298	0.0982064
hsa-miR-1260a	-0.0622346	10.2571	0.0443162	0.0982064
hsa-miR-576-3p	-0.0988114	2.20567	0.0457987	0.101326
hsa-miR-5100	-0.0626424	5.28758	0.0463803	0.102445
hsa-miR-181a-3p	-0.0688673	1.96181	0.0466152	0.102796
hsa-miR-4722-5p	0.179402	-3.46992	0.0469446	0.103354
hsa-miR-371b-5p	0.0686813	-0.352542	0.0471992	0.103746
hsa-miR-1292-3p	0.0768377	-0.523044	0.0473842	0.103984
hsa-miR-1260b	-0.0606677	10.2695	0.0490061	0.107357
hsa-miR-10395-3p	0.183898	-3.21377	0.0490798	0.107357
hsa-miR-190b-5p	-0.102377	-0.11313	0.0500937	0.109398
hsa-miR-144-3p	-0.814686	1.16415	0.0503149	0.109704
hsa-let-7d-3p	0.0681507	8.78546	0.0503971	0.109707
hsa-miR-6503-5p	0.0869705	-1.3409	0.050509	0.109774
hsa-miR-6800-3p	0.120629	-2.4207	0.0509101	0.110468
hsa-miR-5684	-0.10376	-2.23183	0.0514574	0.111477
hsa-miR-330-5p	0.0566844	2.37345	0.0516761	0.111772
hsa-miR-3180	0.122317	-2.25374	0.0521129	0.112537
hsa-miR-3180-3p	0.122062	-2.25363	0.0525688	0.113145
hsa-miR-889-3p	-0.257018	-4.08301	0.0525713	0.113145
hsa-miR-550a-3-5p	-0.0399788	4.5806	0.052645	0.113145
hsa-miR-6764-3p	0.113779	-2.3061	0.0528141	0.113329
hsa-miR-22-5p	-0.0547612	5.01122	0.0541684	0.116051
hsa-miR-6758-5p	0.191822	-3.51638	0.0550509	0.117755
hsa-miR-9903	-0.103547	-1.55811	0.0556866	0.118861
hsa-miR-6812-5p	-0.24335	-4.05201	0.0557902	0.118861
hsa-miR-660-3p	0.0590566	1.65052	0.0558313	0.118861
hsa-miR-4738-3p	0.0532631	0.552083	0.0560081	0.11905
hsa-miR-671-5p	0.0563815	0.489075	0.0570564	0.120904
hsa-miR-10398-3p	0.167251	-3.3812	0.0570588	0.120904
hsa-miR-185-5p	-0.0424242	11.5901	0.0583638	0.123476
hsa-miR-1225-3p	0.167939	-3.27444	0.0586178	0.12382
hsa-miR-182-3p	-0.150279	-3.00905	0.0592369	0.124933
hsa-miR-5004-3p	0.155889	-3.35885	0.0599213	0.12618
hsa-miR-627-3p	-0.064333	2.59002	0.0610578	0.128373
hsa-miR-4734	0.163253	-3.35842	0.0619083	0.129959
hsa-miR-4741	0.185373	-3.66267	0.0623143	0.130609
hsa-miR-203a-3p	-0.226848	-3.02342	0.0629745	0.131789
hsa-miR-6741-5p	0.143258	-2.99881	0.0631634	0.13198
hsa-miR-125b-1-3p	0.172454	-2.60776	0.0634255	0.132304
hsa-miR-6772-3p	0.120193	-2.5709	0.0635138	0.132304
hsa-miR-3162-3p	0.0884976	-1.20343	0.0641455	0.133415
hsa-miR-744-3p	-0.0667027	0.517317	0.0643013	0.133505
hsa-miR-125b-5p	0.104045	7.66173	0.0643862	0.133505
hsa-miR-6862-5p	0.0796709	-1.11321	0.0646126	0.13377
hsa-miR-6731-5p	0.231878	-4.0416	0.0649318	0.134226
hsa-miR-589-5p	0.0407784	4.88267	0.066553	0.137303
hsa-miR-7975	-0.214087	-4.05349	0.0666725	0.137303
hsa-miR-3202	0.0730657	-1.06725	0.0667249	0.137303
hsa-miR-6834-3p	-0.143765	-3.22788	0.0672521	0.138178
hsa-miR-103a-1-5p	-0.0854763	-0.776537	0.0678897	0.139277
hsa-miR-6875-5p	0.104282	-2.26567	0.0685104	0.140337
hsa-miR-136-3p	-0.179652	-3.67943	0.0689609	0.141047
hsa-miR-4747-5p	0.122543	-2.57602	0.0693409	0.14161
hsa-miR-3125	-0.179989	-3.2468	0.0703625	0.14348
hsa-miR-6820-5p	0.130462	-3.00559	0.0705085	0.143562
hsa-miR-4795-3p	-0.222329	-4.01603	0.0719796	0.146337
hsa-miR-1281	0.262309	-4.20798	0.0721991	0.146563
hsa-miR-1343-5p	0.227835	-3.89409	0.0728433	0.14765
hsa-miR-5192	0.222614	-3.99894	0.0730074	0.147761
hsa-miR-296-5p	0.0623511	4.74363	0.0743507	0.150255
hsa-miR-4644	0.116583	-2.48002	0.0756559	0.152665
hsa-miR-1224-3p	0.0833827	0.353035	0.0759209	0.152891
hsa-miR-4467	-0.173995	-2.66581	0.0759939	0.152891
hsa-miR-6734-5p	0.078668	1.51449	0.0782017	0.1571
hsa-miR-296-3p	0.114233	-2.52241	0.0786903	0.157847
hsa-miR-3158-3p	0.0478225	2.25047	0.0795849	0.159405
hsa-miR-224-3p	-0.223676	-4.05278	0.08102	0.161803
hsa-miR-509-3p	-0.155236	-3.33124	0.0810212	0.161803
hsa-miR-941	-0.0442413	5.44459	0.081173	0.161868
hsa-miR-16-2-3p	0.0887953	10.1645	0.081339	0.16196
hsa-miR-151b	0.0385609	8.21474	0.0824514	0.163934
hsa-miR-1246	0.16004	-2.15592	0.0827949	0.164376
hsa-miR-548at-3p	-0.0877943	-1.47647	0.0841024	0.166727
hsa-miR-194-3p	-0.0589745	0.0598995	0.0859218	0.170085
hsa-miR-6789-3p	0.0832849	-1.66932	0.0870328	0.172033
hsa-miR-425-5p	0.0351237	11.4287	0.0880048	0.1737
hsa-miR-1289	-0.100938	-2.53131	0.0885947	0.17461
hsa-miR-4482-5p	0.158577	-2.96671	0.0893006	0.175746
hsa-miR-4449	0.116342	-2.79218	0.0898536	0.176526
hsa-miR-1306-3p	0.064923	2.30876	0.089958	0.176526
hsa-miR-339-3p	0.0509861	5.21179	0.0902262	0.176796
hsa-miR-6746-3p	0.130879	-3.05567	0.0904411	0.176961
hsa-miR-543	0.0823039	2.91094	0.0907954	0.177398
hsa-miR-6501-5p	0.0669617	0.0526886	0.0912199	0.177763
hsa-miR-642a-3p	0.08731	-1.64734	0.0912445	0.177763
hsa-miR-324-5p	0.0340489	7.28812	0.0916149	0.177978
hsa-miR-2277-5p	-0.100869	-2.50961	0.091618	0.177978
hsa-miR-6735-3p	0.0759669	-1.40441	0.0918151	0.178106
hsa-miR-3940-5p	-0.237458	-4.11073	0.0924296	0.179041
hsa-miR-4714-3p	-0.0585782	-0.358106	0.0928415	0.179582
hsa-miR-154-3p	-0.266621	-4.26463	0.0934566	0.180514
hsa-miR-411-3p	-0.12183	-1.93852	0.0935977	0.180529
hsa-miR-326	0.056163	3.81137	0.0938029	0.180667
hsa-miR-3154	0.158844	-3.43588	0.0948308	0.182388
hsa-miR-6884-5p	0.0701931	-0.688963	0.0957105	0.183696
hsa-miR-580-5p	-0.21994	-4.18087	0.0958173	0.183696
hsa-miR-1278	-0.233934	-4.18113	0.0959181	0.183696
hsa-miR-504-5p	0.0945394	0.439821	0.0963495	0.184262
hsa-miR-943	0.0641583	-1.01207	0.0965345	0.184355
hsa-miR-3184-3p	0.199159	-3.98095	0.0971502	0.18527
hsa-miR-4668-5p	0.0971998	-2.3276	0.0973821	0.185451
hsa-miR-323b-3p	0.0905379	2.7307	0.098171	0.186491
hsa-miR-3120-3p	-0.0851921	-1.69355	0.0982932	0.186491
hsa-miR-656-3p	-0.133486	-2.95772	0.0983418	0.186491
hsa-miR-378e	-0.182781	-4.1073	0.0985031	0.186536
hsa-miR-6890-5p	0.200997	-3.96111	0.0989516	0.187124
hsa-miR-497-5p	-0.180288	-3.82996	0.0992409	0.187409
hsa-miR-30b-3p	-0.0941216	-1.3132	0.0996045	0.187834
hsa-miR-584-5p	-0.0565781	7.03058	0.102926	0.193827
hsa-miR-125b-2-3p	-0.139288	-3.41903	0.103959	0.1955
hsa-miR-4695-5p	0.192634	-3.95587	0.104626	0.196301
hsa-miR-6833-5p	0.206674	-4.04309	0.104741	0.196301
hsa-miR-3913-3p	-0.0743314	-0.900722	0.10482	0.196301
hsa-miR-337-3p	-0.0938999	1.40551	0.106234	0.198306
hsa-miR-3191-3p	0.127772	-3.17151	0.106281	0.198306
hsa-miR-2355-5p	0.167328	-3.82662	0.10633	0.198306
hsa-miR-4669	0.169287	-0.713564	0.10706	0.199395
hsa-miR-6829-3p	0.182985	-3.87476	0.107928	0.200734
hsa-let-7b-5p	0.0714079	12.0479	0.108319	0.201185
hsa-miR-1180-5p	0.133406	-3.32073	0.108857	0.201907
hsa-miR-1268a	-0.140752	-1.65662	0.109579	0.202834
hsa-miR-548as-5p	-0.173027	-3.91847	0.109656	0.202834
hsa-miR-6761-3p	0.124945	-3.1287	0.110063	0.203309
hsa-miR-3617-3p	0.114502	-2.72232	0.111288	0.205158
hsa-miR-5196-3p	0.099118	-2.29349	0.111367	0.205158
hsa-miR-6854-3p	-0.153648	-3.63806	0.113924	0.209583
hsa-miR-654-5p	0.0929068	-1.28297	0.11408	0.209585
hsa-miR-125a-3p	0.0881101	-2.07516	0.114807	0.210635
hsa-miR-449a	-0.225013	-4.18886	0.116413	0.213293
hsa-miR-4751	0.203471	-4.02171	0.116913	0.21392
hsa-miR-597-3p	-0.0549919	-0.0708865	0.117575	0.214839
hsa-miR-6869-5p	0.166828	-3.76174	0.119108	0.217348
hsa-miR-134-5p	0.0841254	0.686085	0.119743	0.218182
hsa-miR-6732-3p	0.0694151	-1.24244	0.119888	0.218182
hsa-miR-1185-2-3p	-0.199393	-4.08562	0.120272	0.218589
hsa-miR-7705	-0.175089	-3.94092	0.123409	0.223988
hsa-miR-548h-3p	-0.0816163	3.12548	0.124272	0.225147
hsa-miR-550a-5p	-0.0307016	5.42109	0.12438	0.225147
hsa-miR-6790-3p	0.0804245	-2.15609	0.125019	0.225741
hsa-miR-4687-3p	0.189167	-3.97686	0.125041	0.225741
hsa-miR-548z	-0.081458	3.12762	0.125273	0.225858
hsa-miR-6892-3p	0.232324	-4.11864	0.12566	0.226112
hsa-miR-6875-3p	0.0659312	-1.07554	0.125748	0.226112
hsa-miR-22-3p	0.0452529	9.46497	0.126	0.226265
hsa-miR-6781-3p	-0.123682	-3.25173	0.126417	0.226714
hsa-miR-4659b-3p	0.0484136	4.11137	0.127413	0.228197
hsa-miR-6836-5p	0.0797722	-2.05408	0.12782	0.228624
hsa-miR-26b-3p	-0.0474456	4.96474	0.128085	0.228796
hsa-miR-3124-5p	0.0810901	-1.59832	0.129229	0.230534
hsa-miR-6764-5p	0.0458898	0.0718377	0.130291	0.232067
hsa-miR-3179	0.0451754	0.966174	0.130431	0.232067
hsa-miR-4690-3p	-0.0820397	-1.85512	0.131547	0.233746
hsa-miR-365b-3p	0.0368757	4.829	0.13199	0.233789
hsa-miR-1249-3p	0.0564497	5.18348	0.132045	0.233789
hsa-miR-365a-3p	0.0368664	4.82895	0.132089	0.233789
hsa-miR-2116-3p	-0.0949252	-2.42951	0.133626	0.235931
hsa-miR-6502-5p	-0.141598	-3.58096	0.133648	0.235931
hsa-miR-548b-3p	-0.170033	-3.83609	0.134168	0.236541
hsa-miR-6794-3p	0.104256	-2.68799	0.135163	0.237863
hsa-miR-1224-5p	0.0995673	-1.84188	0.135269	0.237863
hsa-miR-4645-3p	-0.0942577	-2.54372	0.136076	0.238753
hsa-miR-4653-3p	0.155815	-3.66486	0.136338	0.238753
hsa-miR-4755-3p	0.0579361	-1.04285	0.13644	0.238753
hsa-miR-4448	-0.0403233	2.0966	0.136653	0.238753
hsa-miR-181b-2-3p	-0.11039	-2.99385	0.136657	0.238753
hsa-miR-3679-5p	0.100268	-2.58239	0.137288	0.239547
hsa-miR-26a-1-3p	-0.0894625	-1.53209	0.137506	0.239619
hsa-miR-581	-0.0705424	-0.600182	0.138956	0.241833
hsa-miR-589-3p	-0.0420875	1.75091	0.139603	0.242648
hsa-miR-6804-5p	0.0598173	-0.699769	0.140343	0.243622
hsa-miR-6810-3p	0.066676	-0.921253	0.141728	0.2455
hsa-miR-4781-3p	0.0415281	1.6609	0.141788	0.2455
hsa-miR-128-3p	-0.0386788	9.83439	0.143309	0.247817
hsa-miR-3155a	-0.187876	-4.10445	0.144308	0.249226
hsa-miR-6726-5p	0.175982	-3.98834	0.144531	0.249293
hsa-miR-6777-5p	0.151888	-3.75877	0.1453	0.2503
hsa-miR-502-3p	-0.0355254	7.12837	0.145665	0.25053
hsa-miR-5088-3p	-0.180557	-4.05248	0.145933	0.25053
hsa-miR-145-3p	-0.0700481	-0.150304	0.145988	0.25053
hsa-miR-4482-3p	0.1499	0.540798	0.147662	0.253081
hsa-miR-3614-5p	0.0759366	-1.29903	0.147855	0.253092
hsa-miR-6852-3p	0.0616445	-0.827923	0.14867	0.254166
hsa-miR-128-1-5p	-0.0675718	-1.75882	0.149029	0.254459
hsa-miR-487b-5p	0.119085	-2.93181	0.15174	0.258761
hsa-miR-6895-3p	0.0914386	-2.40331	0.152083	0.25902
hsa-miR-382-3p	-0.0948841	-1.45201	0.15385	0.261379
hsa-miR-6852-5p	0.0387549	0.393162	0.153855	0.261379
hsa-miR-4446-3p	0.0650982	-0.519596	0.154166	0.26158
hsa-miR-6840-5p	0.0918199	-0.805831	0.154565	0.261929
hsa-miR-7113-5p	0.0554625	-0.718399	0.155767	0.263636
hsa-miR-6855-3p	0.0400437	0.70377	0.156808	0.2649
hsa-miR-4665-5p	0.0730625	-1.85753	0.156905	0.2649
hsa-miR-1285-3p	-0.0266549	4.82443	0.158543	0.266864
hsa-miR-4726-5p	0.193273	-4.14319	0.158551	0.266864
hsa-miR-1178-3p	0.0665358	-1.40833	0.158804	0.266864
hsa-miR-205-5p	0.168934	-1.38505	0.158857	0.266864
hsa-miR-24-1-5p	-0.112968	-3.23936	0.159658	0.267595
hsa-miR-196a-1-3p	-0.160583	-2.19739	0.159688	0.267595
hsa-miR-3617-5p	0.140228	-3.65635	0.162347	0.271715
hsa-miR-378c	-0.057052	2.69554	0.164414	0.274836
hsa-miR-508-5p	-0.161947	-3.93943	0.166964	0.278754
hsa-miR-3609	0.113313	-3.11949	0.167393	0.279051
hsa-miR-6763-3p	0.0884986	-2.38916	0.167554	0.279051
hsa-miR-7703	0.0993087	-2.99627	0.16937	0.281728
hsa-miR-6788-3p	0.188482	-4.07666	0.16979	0.282081
hsa-miR-4474-3p	0.137017	-3.77837	0.170294	0.282571
hsa-miR-10527-5p	0.0325861	3.08714	0.170768	0.283011
hsa-miR-6849-3p	0.0492652	0.094159	0.171294	0.283302
hsa-miR-6736-5p	0.127602	-3.51181	0.171658	0.283302
hsa-miR-200c-3p	-0.0392988	3.06759	0.17172	0.283302
hsa-miR-3158-5p	0.041783	0.5904	0.17178	0.283302
hsa-miR-3675-5p	0.112094	-2.79222	0.172277	0.283776
hsa-miR-616-5p	-0.0361348	2.87943	0.172855	0.284381
hsa-miR-758-5p	0.152432	-3.94131	0.173738	0.285488
hsa-miR-6736-3p	0.0955776	-2.96402	0.174938	0.28711
hsa-miR-1294	0.0431382	3.72417	0.175639	0.287911
hsa-miR-7847-3p	0.101133	-1.37523	0.177354	0.290371
hsa-miR-4781-5p	-0.0674298	-1.86129	0.179502	0.293534
hsa-miR-511-5p	-0.148086	-3.83182	0.18116	0.295888
hsa-miR-6862-3p	0.0880661	-2.75813	0.181747	0.296489
hsa-miR-6867-3p	0.172035	-4.05745	0.182107	0.296719
hsa-miR-4507	0.108949	-2.67928	0.182662	0.297264
hsa-miR-6793-5p	0.10157	-3.05927	0.183482	0.29806
hsa-miR-3164	0.0694061	-1.93676	0.183591	0.29806
hsa-miR-6894-5p	0.119212	-3.40092	0.184022	0.298402
hsa-miR-942-5p	0.0295298	9.2097	0.184292	0.298483
hsa-miR-335-3p	-0.050453	3.26091	0.185135	0.299489
hsa-miR-6853-3p	0.0622065	-1.69698	0.186008	0.300542
hsa-miR-6505-3p	-0.0454263	0.263819	0.186659	0.300889
hsa-miR-501-5p	0.0298747	5.119	0.186698	0.300889
hsa-miR-654-3p	-0.0718781	2.35274	0.186889	0.300889
hsa-miR-33b-3p	-0.0790509	-2.34349	0.188511	0.30314
hsa-miR-513a-5p	-0.185801	-4.13956	0.189803	0.304613
hsa-miR-378d	-0.064192	-1.02055	0.189877	0.304613
hsa-miR-3200-3p	0.0365977	4.39634	0.190334	0.304985
hsa-miR-5698	-0.172402	-2.94609	0.193945	0.310067
hsa-miR-4444	-0.132646	-3.79598	0.194151	0.310067
hsa-miR-3682-3p	-0.0799895	-1.97549	0.194286	0.310067
hsa-miR-6785-5p	0.18871	-4.20655	0.194422	0.310067
hsa-miR-4743-3p	0.127038	-3.65211	0.195101	0.310785
hsa-miR-6516-3p	-0.167039	-4.10952	0.195571	0.311167
hsa-miR-6803-5p	-0.153876	-4.01443	0.196503	0.312283
hsa-miR-6515-5p	0.0747386	-2.33753	0.196814	0.312411
hsa-miR-151a-5p	-0.0273938	10.5159	0.197152	0.312581
hsa-miR-5001-5p	-0.128749	-3.6887	0.198594	0.314499
hsa-miR-4738-5p	0.137517	-3.8329	0.199205	0.315097
hsa-miR-1304-3p	-0.0344334	4.19984	0.201089	0.317707
hsa-miR-103a-2-5p	-0.045238	2.58945	0.204073	0.322045
hsa-miR-3184-5p	0.156544	-4.03002	0.20476	0.322488
hsa-miR-339-5p	0.0419908	6.52132	0.20483	0.322488
hsa-miR-216b-5p	-0.151217	-3.92995	0.205111	0.322555
hsa-miR-30a-5p	-0.047333	4.78786	0.205675	0.323067
hsa-miR-7107-3p	0.159098	-4.00703	0.207264	0.325186
hsa-miR-6874-5p	0.167736	-4.1369	0.208387	0.32657
hsa-miR-522-3p	0.170882	-3.8438	0.210244	0.329098
hsa-miR-127-3p	-0.0716406	0.670206	0.211962	0.331404
hsa-miR-33b-5p	-0.16631	-4.15312	0.212634	0.331891
hsa-miR-6763-5p	-0.154396	-3.97762	0.212763	0.331891
hsa-miR-1262	-0.117842	-3.37881	0.214562	0.334311
hsa-miR-3190-3p	0.0665649	-2.19169	0.218006	0.339274
hsa-miR-3173-3p	0.0774273	-2.38519	0.218388	0.339274
hsa-miR-4762-5p	-0.0472179	-0.309268	0.218498	0.339274
hsa-miR-4489	0.0769856	-2.53062	0.21903	0.33971
hsa-miR-6752-3p	0.0651082	-1.87414	0.224785	0.348237
hsa-miR-3940-3p	0.0407508	7.18196	0.226211	0.349837
hsa-miR-449c-5p	-0.176818	-4.11656	0.226335	0.349837
hsa-miR-500b-3p	0.0583907	-1.68481	0.227016	0.35049
hsa-miR-154-5p	0.0806501	-1.69923	0.22811	0.351779
hsa-miR-4787-5p	-0.0821043	-2.39448	0.228449	0.351899
hsa-miR-7977	0.0246567	3.77755	0.229086	0.35248
hsa-miR-150-3p	0.0312593	1.62585	0.230772	0.354672
hsa-miR-4787-3p	0.0849265	-2.81638	0.231344	0.355147
hsa-miR-7846-3p	-0.154898	-4.09145	0.231837	0.3555
hsa-miR-616-3p	0.0409459	-0.17318	0.233925	0.358182
hsa-miR-379-3p	-0.11001	-3.31092	0.234114	0.358182
hsa-miR-6785-3p	0.109841	-3.49169	0.234465	0.358262
hsa-miR-4707-3p	0.121222	2.21596	0.234777	0.358262
hsa-miR-6851-3p	0.0512627	-1.146	0.234961	0.358262
hsa-miR-5001-3p	0.0379712	3.36985	0.237688	0.36175
hsa-miR-382-5p	0.0689169	0.866622	0.237782	0.36175
hsa-miR-4717-3p	0.0840739	-2.70665	0.239523	0.363644
hsa-miR-10398-5p	-0.0872232	-3.01131	0.239564	0.363644
hsa-miR-877-5p	0.0387687	2.06313	0.239945	0.363776
hsa-miR-378g	0.0640433	-2.49618	0.240744	0.363776
hsa-miR-96-3p	0.152747	-4.05286	0.240892	0.363776
hsa-miR-933	-0.0731914	-2.51766	0.241096	0.363776
hsa-miR-212-3p	-0.0781624	-2.71099	0.241151	0.363776
hsa-miR-10396b-5p	0.127536	-3.85131	0.241264	0.363776
hsa-miR-3064-5p	0.0625099	-1.66821	0.24264	0.365445
hsa-miR-363-5p	-0.0360678	0.190989	0.24386	0.366873
hsa-miR-6884-3p	0.0462816	-0.860884	0.244349	0.367202
hsa-miR-580-3p	-0.134694	-3.95258	0.245684	0.368799
hsa-miR-378f	-0.0583831	-2.28813	0.246353	0.369055
hsa-miR-6716-3p	0.0871226	-2.99922	0.2464	0.369055
hsa-miR-378a-3p	-0.0325666	7.53756	0.247364	0.37009
hsa-miR-6838-5p	0.167132	-4.14655	0.248134	0.370831
hsa-miR-10396b-3p	-0.152586	-4.14732	0.250288	0.373638
hsa-miR-4479	0.0620207	-2.13645	0.257494	0.383972
hsa-miR-4446-5p	0.131776	-3.944	0.258249	0.384674
hsa-miR-891a-5p	-0.106902	-3.40766	0.258753	0.385002
hsa-miR-6876-5p	-0.0821809	-3.00063	0.264703	0.393422
hsa-miR-4639-5p	0.149229	-4.16284	0.265503	0.39418
hsa-miR-675-3p	-0.16123	-4.2251	0.265862	0.394279
hsa-miR-6771-5p	0.147617	-4.1058	0.266908	0.395398
hsa-miR-202-3p	0.0661944	-1.54775	0.268894	0.397904
hsa-miR-6873-5p	0.0724455	-2.45872	0.271535	0.401374
hsa-miR-6802-5p	0.136555	-4.01635	0.272055	0.401704
hsa-miR-5584-5p	0.0597888	-1.63917	0.272783	0.40234
hsa-miR-3667-3p	0.0708235	-0.209351	0.273939	0.403151
hsa-miR-6827-3p	0.135133	-4.0116	0.274222	0.403151
hsa-miR-4708-3p	0.122482	-3.84245	0.274226	0.403151
hsa-miR-501-3p	-0.0224039	7.49509	0.27469	0.403236
hsa-miR-6767-5p	0.0352123	-0.0269979	0.274979	0.403236
hsa-miR-885-5p	0.0493239	-0.566475	0.275177	0.403236
hsa-miR-31-5p	-0.0612893	-1.75278	0.275585	0.403396
hsa-miR-7112-3p	-0.113153	-3.76695	0.279125	0.408138
hsa-miR-7108-3p	0.0628852	-2.27025	0.281931	0.411795
hsa-miR-4672	-0.0382711	0.64713	0.283274	0.413312
hsa-miR-4512	0.0859068	-3.24575	0.286185	0.41711
hsa-miR-873-3p	-0.117214	-3.82946	0.287156	0.418075
hsa-miR-4521	-0.0390872	-0.383157	0.289106	0.420461
hsa-miR-3163	-0.0332582	1.22177	0.290209	0.421613
hsa-miR-762	-0.160809	-4.27502	0.293268	0.4256
hsa-miR-6739-5p	-0.0754375	-3.02262	0.294188	0.426163
hsa-miR-3620-5p	0.0787442	-1.29211	0.294285	0.426163
hsa-miR-1913	-0.0935657	-3.39356	0.294801	0.426454
hsa-miR-4725-3p	0.106337	-3.66159	0.295389	0.426848
hsa-miR-27b-5p	-0.054836	-1.86367	0.29574	0.426899
hsa-miR-4435	0.0369275	0.208232	0.297525	0.429019
hsa-miR-3613-3p	-0.0369726	3.88522	0.298876	0.430509
hsa-miR-6878-3p	0.0946964	-3.60617	0.301555	0.433906
hsa-let-7e-3p	0.0673184	-2.53762	0.3031	0.435666
hsa-miR-4999-3p	-0.124273	-3.98311	0.304586	0.437112
hsa-miR-6815-3p	0.0388421	-0.760016	0.304752	0.437112
hsa-miR-1268b	0.0692001	-1.94512	0.307264	0.440249
hsa-miR-6866-5p	-0.0375377	-0.722077	0.307942	0.440754
hsa-miR-642b-3p	0.103371	-3.76029	0.316231	0.451717
hsa-miR-6782-5p	0.0964603	-3.60199	0.316269	0.451717
hsa-miR-345-5p	0.0279823	4.42348	0.320406	0.457144
hsa-miR-6837-5p	0.0431227	-1.11839	0.321727	0.458546
hsa-miR-1307-3p	-0.0359683	6.00136	0.323614	0.460749
hsa-miR-6890-3p	0.145061	-4.22048	0.324404	0.461389
hsa-miR-370-3p	-0.058518	-0.94566	0.325977	0.462692
hsa-miR-34a-5p	0.072744	-1.37299	0.326003	0.462692
hsa-miR-3146	-0.0613807	-2.67488	0.328252	0.465273
hsa-miR-5009-3p	-0.125258	-4.13554	0.328509	0.465273
hsa-miR-483-3p	0.0642219	1.26182	0.331177	0.468214
hsa-miR-3144-3p	0.114832	-3.89217	0.331277	0.468214
hsa-miR-4804-3p	0.0395031	1.13716	0.332766	0.469829
hsa-miR-1256	-0.0553126	-2.24275	0.333161	0.469896
hsa-miR-4709-5p	-0.112237	-3.94336	0.334135	0.470779
hsa-miR-6778-3p	0.0765299	-3.15774	0.335469	0.471903
hsa-miR-130b-5p	0.0187856	8.07359	0.33563	0.471903
hsa-miR-1255b-5p	0.0258175	2.12369	0.33696	0.473282
hsa-miR-218-5p	-0.129407	-0.499069	0.34016	0.477282
hsa-miR-4484	-0.0904608	-3.62713	0.34106	0.478049
hsa-miR-6738-3p	0.0335356	-0.0422163	0.341952	0.478804
hsa-miR-212-5p	-0.0390778	-0.950747	0.344658	0.481863
hsa-miR-664a-5p	0.0252855	2.36303	0.345002	0.481863
hsa-miR-4742-3p	-0.0308903	5.47244	0.345204	0.481863
hsa-miR-576-5p	-0.0318309	8.62801	0.347261	0.48387
hsa-miR-940	0.046407	-1.5713	0.347357	0.48387
hsa-miR-6779-3p	0.0714656	-2.97963	0.347825	0.484024
hsa-miR-6805-3p	0.0741261	-3.16727	0.349479	0.485371
hsa-miR-4746-5p	-0.0360034	-0.46499	0.34951	0.485371
hsa-miR-25-5p	0.027068	3.07009	0.3518	0.488051
hsa-miR-1972	-0.103713	-3.68676	0.353951	0.490532
hsa-miR-3611	-0.131726	-4.2455	0.358794	0.496736
hsa-miR-610	0.0308058	0.567035	0.359883	0.497733
hsa-miR-6505-5p	-0.0453885	-1.87731	0.36034	0.497857
hsa-miR-4725-5p	0.127148	-4.1567	0.360795	0.497978
hsa-miR-4757-5p	0.117076	-4.11691	0.365007	0.503279
hsa-miR-6831-3p	-0.122082	-4.16512	0.366445	0.504747
hsa-miR-129-2-3p	0.043224	-1.59479	0.370428	0.509716
hsa-miR-361-5p	0.0252752	7.22136	0.374509	0.514578
hsa-miR-30c-2-3p	-0.099164	-3.46963	0.3749	0.514578
hsa-miR-5189-3p	0.0639272	3.42836	0.375102	0.514578
hsa-miR-6513-3p	-0.0234797	4.16083	0.378795	0.519118
hsa-miR-6731-3p	0.0552013	-2.41886	0.3795	0.519558
hsa-miR-6753-3p	0.0636981	-2.96264	0.380065	0.519807
hsa-miR-1287-5p	-0.0433726	1.32104	0.381488	0.521009
hsa-miR-1909-5p	-0.0759888	-3.43836	0.38207	0.521009
hsa-miR-3679-3p	0.101758	-3.85597	0.382099	0.521009
hsa-miR-3139	-0.0918136	-3.85989	0.383184	0.521963
hsa-miR-376a-5p	0.0987109	-3.90943	0.38376	0.522222
hsa-miR-1910-3p	0.113078	-4.0933	0.387048	0.525394
hsa-miR-450a-2-3p	-0.0397171	-1.03626	0.387137	0.525394
hsa-miR-6131	-0.0438284	-1.74748	0.387536	0.525394
hsa-miR-4722-3p	-0.0984541	-3.89955	0.387643	0.525394
hsa-miR-6813-5p	0.0580619	-2.76854	0.394896	0.534689
hsa-miR-186-5p	-0.0230853	9.79117	0.395542	0.535029
hsa-miR-5690	0.033378	0.560647	0.400111	0.540669
hsa-miR-4688	0.069253	-3.37444	0.400561	0.540737
hsa-miR-6850-5p	-0.0440679	-1.77181	0.403859	0.544647
hsa-miR-6770-5p	-0.0656093	-3.27083	0.405018	0.545667
hsa-miR-99b-3p	0.048322	-1.7785	0.406254	0.546405
hsa-miR-3191-5p	0.0464122	-2.23083	0.406374	0.546405
hsa-miR-494-3p	-0.0431753	2.0916	0.40918	0.548894
hsa-miR-2355-3p	-0.0400214	-1.03689	0.409266	0.548894
hsa-miR-625-5p	-0.0254581	2.39736	0.409441	0.548894
hsa-miR-4797-3p	-0.040187	-1.5947	0.41148	0.551082
hsa-miR-450a-1-3p	-0.0797178	-3.61523	0.41199	0.551219
hsa-miR-4731-3p	0.0975587	-3.98135	0.414728	0.554336
hsa-miR-138-2-3p	0.0952152	-3.97291	0.415501	0.554821
hsa-miR-3115	-0.10446	-4.08513	0.416246	0.555268
hsa-miR-3137	0.0802433	-3.75964	0.418879	0.55823
hsa-miR-6776-3p	0.0692663	-3.29794	0.421584	0.561282
hsa-miR-188-3p	-0.0789804	-3.75965	0.422226	0.561366
hsa-miR-4318	-0.0732181	-3.89177	0.422476	0.561366
hsa-miR-200a-3p	-0.117581	-3.89492	0.424639	0.563481
hsa-miR-939-3p	0.0833266	-3.7553	0.424899	0.563481
hsa-miR-371b-3p	0.072768	-3.54488	0.4268	0.565447
hsa-miR-1250-5p	0.0670191	-3.30347	0.427843	0.566274
hsa-miR-615-3p	0.0782053	-3.522	0.42835	0.566393
hsa-miR-4670-3p	-0.0520248	-2.74669	0.430912	0.569224
hsa-miR-3177-3p	0.0230493	1.48832	0.433714	0.572367
hsa-miR-1290	-0.101817	-3.95232	0.438846	0.57797
hsa-miR-6801-5p	-0.0670136	-3.25251	0.438986	0.57797
hsa-miR-5009-5p	0.0295539	-0.971	0.439535	0.57797
hsa-miR-4661-5p	-0.0304967	0.0337876	0.439667	0.57797
hsa-miR-30c-5p	-0.0196226	11.8858	0.441218	0.579447
hsa-miR-1255b-2-3p	-0.0509489	-2.05299	0.445586	0.584538
hsa-miR-424-3p	0.0208151	4.80369	0.445959	0.584538
hsa-miR-199a-5p	-0.027726	3.33552	0.447844	0.586442
hsa-miR-99b-5p	0.0229315	5.60092	0.448426	0.586636
hsa-miR-491-5p	0.026583	0.706912	0.449146	0.587012
hsa-miR-4440	0.0361532	-0.114046	0.450358	0.587803
hsa-miR-378b	0.0736294	-3.90817	0.45062	0.587803
hsa-miR-6893-3p	0.0396559	-1.78009	0.452306	0.589435
hsa-miR-3614-3p	-0.104476	-4.21026	0.453303	0.589873
hsa-miR-5588-3p	0.0329185	-1.35725	0.453514	0.589873
hsa-miR-4635	0.028934	-0.244848	0.454353	0.590397
hsa-miR-4670-5p	-0.0653026	-3.53509	0.455765	0.59111
hsa-miR-590-3p	-0.897254	-3.45487	0.456231	0.59111
hsa-miR-6089	-0.0854934	-3.89686	0.456749	0.59111
hsa-miR-3130-5p	0.0299252	2.23178	0.457257	0.59111
hsa-miR-7151-3p	0.101694	-4.1532	0.45746	0.59111
hsa-miR-6821-3p	0.0719342	-3.59693	0.457521	0.59111
hsa-miR-11401	-0.060479	2.10741	0.46079	0.594766
hsa-miR-6759-3p	0.0925292	-4.05597	0.461368	0.594792
hsa-miR-6821-5p	0.093109	-4.03147	0.461689	0.594792
hsa-miR-2276-5p	0.0801694	-3.83395	0.462377	0.595113
hsa-miR-6807-3p	0.0403438	-2.06522	0.463972	0.596547
hsa-miR-6513-5p	-0.0308599	-1.07651	0.4644	0.596547
hsa-miR-5006-3p	0.0292143	0.99821	0.464813	0.596547
hsa-miR-4701-5p	0.0517368	-2.80336	0.465876	0.597344
hsa-miR-432-5p	0.0453153	0.143195	0.467395	0.598263
hsa-miR-6758-3p	0.0203727	1.06471	0.467476	0.598263
hsa-miR-1298-5p	-0.106644	-4.25455	0.470129	0.60109
hsa-miR-6808-3p	0.0337281	-1.06187	0.472715	0.603827
hsa-miR-2276-3p	-0.0314101	-0.990625	0.474514	0.605553
hsa-miR-6779-5p	0.0878708	-4.03458	0.4751	0.60573
hsa-miR-34c-3p	-0.0976543	-4.17359	0.47778	0.608574
hsa-miR-3200-5p	0.0193601	5.80373	0.479319	0.609961
hsa-miR-4753-3p	-0.0218232	1.0909	0.480909	0.611409
hsa-miR-4539	-0.0746407	-3.70616	0.482381	0.612705
hsa-miR-598-5p	0.0861984	-4.09244	0.48319	0.613158
hsa-miR-4797-5p	0.0791282	-3.9309	0.485149	0.615067
hsa-miR-6832-5p	0.0516623	-2.98687	0.489237	0.61967
hsa-miR-6868-3p	-0.0473486	0.409065	0.49236	0.622436
hsa-miR-625-3p	-0.0214276	5.86237	0.49244	0.622436
hsa-miR-550b-2-5p	-0.0222671	-0.210827	0.493253	0.622436
hsa-miR-181a-2-3p	0.0144096	6.77238	0.493651	0.622436
hsa-miR-6815-5p	0.0277248	-0.379609	0.493745	0.622436
hsa-miR-4659a-3p	-0.0249681	4.97111	0.494228	0.622436
hsa-miR-3936	0.0565325	-3.28895	0.494939	0.622436
hsa-miR-6874-3p	-0.0604418	-3.45656	0.495099	0.622436
hsa-miR-1228-5p	-0.0726827	-3.59638	0.49627	0.62333
hsa-miR-579-5p	0.0250685	0.0228759	0.498297	0.625127
hsa-miR-3133	0.0237687	0.917458	0.498624	0.625127
hsa-miR-3692-3p	-0.0402046	-2.54851	0.501576	0.627875
hsa-miR-4659a-5p	-0.0307669	-1.16396	0.501744	0.627875
hsa-miR-5189-5p	0.0422482	0.196854	0.50374	0.629791
hsa-miR-181b-5p	0.0160458	5.20082	0.506441	0.632276
hsa-miR-4707-5p	0.0539143	-2.06262	0.506753	0.632276
hsa-miR-550b-3p	0.0235786	1.3647	0.507128	0.632276
hsa-miR-4745-5p	0.0480168	-2.7241	0.508823	0.633805
hsa-miR-3619-3p	0.0290075	-1.30134	0.511148	0.636117
hsa-miR-3661	0.029031	-1.56388	0.518505	0.644679
hsa-miR-6727-5p	0.0772508	-4.01184	0.522227	0.648635
hsa-miR-6856-3p	0.074868	-3.9695	0.522983	0.648635
hsa-miR-4508	0.0393749	6.5356	0.523124	0.648635
hsa-miR-1301-3p	0.0125528	4.9159	0.523792	0.648869
hsa-miR-3680-3p	-0.0250198	-0.957115	0.525304	0.650031
hsa-miR-619-5p	-0.0296816	-1.31803	0.525818	0.650031
hsa-miR-5187-3p	-0.0380276	-2.5392	0.526284	0.650031
hsa-miR-2467-3p	0.0773731	-4.03965	0.527021	0.650031
hsa-miR-3920	-0.0823724	-4.11053	0.52713	0.650031
hsa-miR-151a-3p	0.0194982	7.91269	0.527682	0.65012
hsa-miR-4748	0.0476847	-2.9212	0.529328	0.651554
hsa-miR-4470	0.082135	-4.15734	0.532556	0.654318
hsa-miR-346	-0.0523937	-2.06994	0.532938	0.654318
hsa-miR-6751-3p	0.0502934	-3.30397	0.533401	0.654318
hsa-miR-1292-5p	0.0172127	4.53567	0.533506	0.654318
hsa-miR-191-5p	0.0114178	15.3117	0.534065	0.654411
hsa-miR-191-3p	0.0133231	1.41363	0.536654	0.65673
hsa-miR-3188	-0.041845	-1.94803	0.536928	0.65673
hsa-miR-4772-5p	-0.0429187	-2.56971	0.540942	0.660035
hsa-miR-5003-3p	0.0296628	-1.17031	0.54099	0.660035
hsa-miR-605-5p	0.0366678	-1.75037	0.541185	0.660035
hsa-miR-4326	-0.046192	5.29274	0.54158	0.660035
hsa-miR-505-3p	0.0120002	6.76834	0.542376	0.660411
hsa-miR-758-3p	-0.0434623	-2.51965	0.545044	0.663064
hsa-miR-873-5p	-0.0630947	-3.73549	0.552676	0.671744
hsa-miR-3685	0.024544	-1.32978	0.557855	0.677137
hsa-miR-4655-5p	0.0346539	-2.16954	0.558113	0.677137
hsa-miR-4657	-0.0375707	-2.56778	0.563353	0.682439
hsa-miR-1912-3p	-0.0860297	-4.20304	0.563491	0.682439
hsa-miR-3160-5p	-0.0494045	-3.47413	0.564025	0.682475
hsa-miR-6769a-3p	0.0562013	-3.65654	0.566487	0.684843
hsa-miR-6501-3p	0.0458777	-3.23852	0.569195	0.687503
hsa-miR-4727-3p	-0.0391936	-2.54165	0.570042	0.687912
hsa-miR-6847-5p	-0.0353714	-2.56799	0.571539	0.688894
hsa-miR-3939	-0.02737	-1.71364	0.571874	0.688894
hsa-miR-152-5p	0.0792524	-4.21257	0.573854	0.689795
hsa-miR-3529-5p	-0.0520259	-3.57011	0.573863	0.689795
hsa-miR-92a-2-5p	-0.0365068	-2.5655	0.57465	0.689795
hsa-miR-27a-5p	0.0338352	-2.26724	0.574659	0.689795
hsa-miR-4498	0.0460719	-3.25851	0.58071	0.695952
hsa-miR-5004-5p	0.0559884	-3.69166	0.580817	0.695952
hsa-miR-6742-3p	-0.0616068	-3.93408	0.58183	0.69655
hsa-miR-184	0.0276068	-1.36158	0.58424	0.698818
hsa-miR-3918	0.0427761	-3.18523	0.586069	0.700177
hsa-miR-664a-3p	0.0109745	6.30171	0.586411	0.700177
hsa-miR-1914-5p	-0.0262918	-1.3746	0.588449	0.701991
hsa-miR-518b	0.0893287	-4.24579	0.590272	0.703303
hsa-miR-4422	-0.0334743	-1.91134	0.591491	0.703303
hsa-miR-323a-3p	0.0266816	2.06761	0.591931	0.703303
hsa-miR-493-3p	-0.0353649	-1.56998	0.592047	0.703303
hsa-miR-4668-3p	-0.0441003	-3.40337	0.592146	0.703303
hsa-miR-1248	-0.0510166	-3.47478	0.593589	0.704399
hsa-miR-100-5p	0.0622602	7.68478	0.595183	0.705673
hsa-miR-6738-5p	-0.0748408	-4.16084	0.597785	0.706785
hsa-miR-5585-3p	-0.0428406	-2.60674	0.598143	0.706785
hsa-miR-370-5p	0.0667258	-4.15439	0.598205	0.706785
hsa-miR-4712-3p	-0.0624536	-3.94779	0.598826	0.706785
hsa-miR-1296-5p	0.0215054	0.483812	0.599479	0.706785
hsa-miR-219b-5p	-0.0188981	-0.202985	0.599675	0.706785
hsa-let-7b-3p	0.0118986	6.20324	0.599776	0.706785
hsa-miR-769-5p	-0.0151471	2.25398	0.60122	0.707871
hsa-miR-6766-5p	-0.0571039	-3.80701	0.605803	0.712038
hsa-miR-4758-3p	0.0290416	-1.32702	0.605811	0.712038
hsa-miR-6768-5p	0.0412492	-3.21308	0.607191	0.712624
hsa-miR-377-5p	0.036212	-2.5284	0.60764	0.712624
hsa-miR-542-5p	0.0186266	-0.320812	0.608137	0.712624
hsa-miR-6881-5p	0.0616802	-3.95748	0.609013	0.712624
hsa-miR-210-3p	-0.0221473	3.79775	0.609149	0.712624
hsa-miR-6877-3p	-0.038176	-3.05987	0.609467	0.712624
hsa-miR-7704	-0.0167333	0.777658	0.613997	0.717043
hsa-miR-6876-3p	-0.0413108	-3.26469	0.614305	0.717043
hsa-miR-431-5p	-0.0291138	-0.614681	0.617964	0.720691
hsa-miR-6780a-3p	-0.0173954	-0.362081	0.61875	0.720988
hsa-miR-409-5p	-0.030834	-1.68103	0.619319	0.720998
hsa-miR-6895-5p	0.0452733	-3.5179	0.619824	0.720998
hsa-miR-6809-5p	-0.0399282	-3.08207	0.621756	0.722625
hsa-miR-8072	0.0618297	-3.98457	0.624284	0.72494
hsa-miR-6843-3p	0.0326044	-2.70519	0.625017	0.725169
hsa-miR-4712-5p	-0.0500838	-3.77184	0.625632	0.725262
hsa-miR-760	0.0306599	-2.31887	0.627681	0.726956
hsa-miR-181a-5p	0.0166401	9.67332	0.628167	0.726956
hsa-miR-4664-3p	-0.0401714	-3.33279	0.629379	0.727736
hsa-miR-3928-5p	0.0391014	-3.30869	0.630251	0.728122
hsa-miR-148a-5p	-0.012414	2.39818	0.633167	0.730867
hsa-miR-4749-5p	-0.0357263	-2.97532	0.634639	0.731368
hsa-miR-3157-3p	0.019073	0.194858	0.63468	0.731368
hsa-miR-4804-5p	-0.0212332	-0.173384	0.640689	0.737664
hsa-miR-548t-5p	0.040594	-3.41653	0.641691	0.737726
hsa-miR-3124-3p	0.0409678	-3.51941	0.641832	0.737726
hsa-miR-2115-5p	0.0252744	-2.04956	0.644124	0.739732
hsa-miR-3922-5p	-0.0529154	-3.96235	0.646943	0.7419
hsa-miR-329-5p	-0.0601789	-4.06395	0.647108	0.7419
hsa-miR-7-2-3p	0.0382222	-3.49096	0.654019	0.749189
hsa-miR-4727-5p	0.0546446	-4.03507	0.657091	0.752072
hsa-miR-4469	-0.0519251	-3.93052	0.661395	0.756147
hsa-miR-6718-5p	0.0258821	-2.1414	0.661768	0.756147
hsa-miR-4640-3p	0.0584828	-4.12613	0.66525	0.758475
hsa-miR-378i	-0.0166661	1.72698	0.665377	0.758475
hsa-miR-10400-5p	-0.0233932	-1.20621	0.665486	0.758475
hsa-miR-551a	-0.0278301	-2.42597	0.66763	0.760278
hsa-miR-3196	-0.0238223	-1.2858	0.671814	0.7644
hsa-miR-6848-5p	0.0345112	-3.14397	0.674894	0.76726
hsa-miR-23b-5p	0.0151577	-0.575854	0.67594	0.767804
hsa-miR-6800-5p	-0.0612647	-4.22045	0.676541	0.767843
hsa-miR-1276	0.0261123	-2.51695	0.677496	0.768283
hsa-miR-4773	0.0382233	-3.35238	0.682965	0.77346
hsa-miR-6816-3p	-0.0180592	-0.923238	0.683204	0.77346
hsa-miR-4437	0.0416973	-3.72827	0.684421	0.773928
hsa-miR-4289	-0.0333785	-3.79811	0.684761	0.773928
hsa-miR-6733-3p	-0.0290872	-3.00139	0.691468	0.780857
hsa-miR-6751-5p	-0.0371325	-3.54713	0.693738	0.782767
hsa-miR-9901	0.0382122	-3.68698	0.697391	0.786234
hsa-miR-92a-1-5p	0.0181229	0.381135	0.69908	0.787482
hsa-miR-3161	0.0438616	-3.50216	0.700873	0.788847
hsa-miR-3613-5p	-0.716947	0.621218	0.70391	0.791177
hsa-miR-1255a	0.0196396	-0.0990752	0.704196	0.791177
hsa-miR-4423-5p	0.0375485	-3.55242	0.704796	0.791177
hsa-miR-4800-3p	-0.0345425	-3.66054	0.705281	0.791177
hsa-miR-195-3p	0.0463071	-4.03925	0.706969	0.792414
hsa-miR-4516	0.0194372	-0.0594864	0.710246	0.795428
hsa-miR-5587-5p	-0.0363706	-3.6353	0.712698	0.797515
hsa-miR-550a-3p	0.0105168	6.96759	0.715184	0.799636
hsa-miR-935	-0.0230936	-2.03089	0.716779	0.800283
hsa-miR-5584-3p	-0.039009	-3.79223	0.717117	0.800283
hsa-miR-5089-3p	0.0424114	-3.98418	0.717536	0.800283
hsa-miR-3922-3p	0.0337524	-3.56798	0.719908	0.802268
hsa-miR-5588-5p	0.0283676	-3.27391	0.723542	0.805655
hsa-miR-6781-5p	0.0310963	-3.43119	0.724142	0.80566
hsa-miR-4786-5p	-0.0201218	-2.36303	0.728572	0.809923
hsa-miR-3168	0.0147224	-1.63315	0.729369	0.810144
hsa-miR-330-3p	0.00642608	2.8926	0.73496	0.815309
hsa-miR-214-3p	-0.0256934	-0.937169	0.735223	0.815309
hsa-miR-6509-5p	-0.0159605	-1.63208	0.737646	0.816963
hsa-miR-2278	-0.0171645	-1.81281	0.737921	0.816963
hsa-miR-376b-3p	0.039944	-4.27465	0.744772	0.82364
hsa-miR-3195	0.0192302	-2.17305	0.745169	0.82364
hsa-miR-6847-3p	-0.0220732	-2.77351	0.746035	0.823925
hsa-miR-1302	0.0394467	-3.97797	0.74845	0.82525
hsa-miR-1304-5p	-0.00924769	0.717351	0.748808	0.82525
hsa-miR-4762-3p	0.0295998	-3.58361	0.749064	0.82525
hsa-miR-7155-5p	0.0264594	-3.30222	0.749747	0.825332
hsa-miR-181d-5p	0.0141914	-0.865074	0.757525	0.833215
hsa-miR-4485-3p	-0.0325929	-3.559	0.762565	0.838078
hsa-miR-6739-3p	-0.0131535	-1.26582	0.764926	0.839991
hsa-miR-323a-5p	0.036428	-3.97989	0.769246	0.844051
hsa-miR-92a-3p	0.00728874	17.3691	0.770321	0.844546
hsa-miR-4473	0.0102613	1.38116	0.772159	0.845653
hsa-miR-29b-1-5p	0.0148094	-1.05651	0.773294	0.845653
hsa-miR-4766-5p	0.0282097	-3.70247	0.773751	0.845653
hsa-miR-652-3p	0.00568348	9.2273	0.773828	0.845653
hsa-miR-4638-3p	0.0172098	-2.475	0.775391	0.846677
hsa-miR-320a-5p	0.0141121	-1.62959	0.776086	0.846753
hsa-miR-3144-5p	-0.0285897	-3.62006	0.779075	0.849148
hsa-miR-1185-1-3p	-0.0292124	-3.71317	0.779535	0.849148
hsa-miR-1910-5p	0.0200512	-2.94545	0.782192	0.851357
hsa-miR-3909	-0.0111307	2.51367	0.784324	0.852992
hsa-miR-6774-3p	0.0162753	-2.36084	0.786235	0.854384
hsa-miR-4767	0.0318666	-3.95723	0.78706	0.854594
hsa-miR-6846-3p	-0.0293485	-3.85304	0.79244	0.85959
hsa-miR-6805-5p	0.0164256	-2.07962	0.79293	0.85959
hsa-miR-193b-5p	-0.0228804	-3.2485	0.793749	0.859789
hsa-miR-3129-3p	-0.016099	-2.39746	0.801153	0.867115
hsa-miR-6783-5p	-0.00868117	-0.0554135	0.805776	0.871011
hsa-miR-6507-5p	-0.0424325	-3.7426	0.806039	0.871011
hsa-miR-219a-1-3p	-0.00815673	-0.393635	0.807469	0.871861
hsa-miR-331-3p	0.00602143	6.25112	0.809132	0.872959
hsa-miR-3065-3p	-0.029511	-4.05777	0.810522	0.873763
hsa-miR-3194-3p	-0.0194293	-3.35211	0.815349	0.878014
hsa-miR-1229-5p	0.0273794	-3.92139	0.816249	0.878014
hsa-miR-6508-5p	0.0199648	-3.45772	0.816552	0.878014
hsa-miR-6733-5p	-0.0156093	-2.90346	0.817533	0.878014
hsa-miR-93-3p	0.00468437	7.91316	0.817707	0.878014
hsa-miR-548q	0.00828807	1.05661	0.81884	0.878533
hsa-miR-1288-3p	-0.0115399	-1.55932	0.820863	0.880007
hsa-miR-6729-5p	0.0179928	-3.18741	0.822065	0.880335
hsa-miR-544b	-0.0304161	-3.92066	0.822469	0.880335
hsa-miR-5188	0.0121434	-2.33887	0.824366	0.881532
hsa-miR-134-3p	0.0256573	-4.08669	0.82489	0.881532
hsa-miR-146a-5p	-0.00632401	5.42472	0.82919	0.885117
hsa-miR-505-5p	0.00497533	3.25402	0.829552	0.885117
hsa-miR-299-5p	-0.0150219	-2.18878	0.832746	0.886563
hsa-miR-6509-3p	-0.00538402	1.88703	0.833308	0.886563
hsa-miR-221-3p	-0.00889226	7.62625	0.833381	0.886563
hsa-miR-519d-3p	-0.0392262	-4.24122	0.833545	0.886563
hsa-miR-5000-3p	0.0233036	-3.94608	0.834181	0.886563
hsa-miR-3667-5p	-0.0128629	2.148	0.838056	0.889983
hsa-miR-2115-3p	-0.00971588	-1.64336	0.848174	0.900022
hsa-miR-6724-5p	-0.0155163	-3.1999	0.850639	0.90193
hsa-miR-4676-3p	0.00733903	-0.714476	0.852549	0.903231
hsa-miR-219b-3p	-0.0285868	-4.29217	0.853199	0.903231
hsa-miR-4323	-0.0120654	-2.60253	0.854181	0.903397
hsa-miR-92b-3p	0.00457369	9.97924	0.854713	0.903397
hsa-miR-4750-5p	-0.0174718	-3.53796	0.855359	0.903397
hsa-miR-4779	0.0124384	-2.71469	0.856047	0.903419
hsa-miR-874-3p	0.00618645	1.99261	0.857263	0.903998
hsa-miR-6818-3p	0.00509579	2.41907	0.861494	0.907176
hsa-miR-375-3p	0.00857882	-0.30131	0.861616	0.907176
hsa-miR-211-5p	0.00565051	0.177276	0.866901	0.911142
hsa-miR-744-5p	0.0045655	5.26698	0.867081	0.911142
hsa-miR-6770-3p	-0.0162966	-3.78577	0.867402	0.911142
hsa-miR-10399-3p	-0.00484702	4.5898	0.869722	0.912871
hsa-miR-1843	-0.00402271	2.7827	0.876062	0.918492
hsa-miR-193b-3p	0.00651025	-0.337526	0.876434	0.918492
hsa-miR-4488	0.00795862	-1.23989	0.878072	0.919497
hsa-miR-503-3p	-0.00922659	-2.5401	0.882209	0.923115
hsa-miR-4526	0.0145721	-3.71202	0.884446	0.924741
hsa-miR-29c-5p	0.00387998	5.429	0.88618	0.925803
hsa-miR-6891-3p	-0.0209217	-4.20898	0.886829	0.925803
hsa-miR-6755-5p	0.00989368	-2.96111	0.890817	0.928806
hsa-miR-1909-3p	-0.0170955	-4.01799	0.891077	0.928806
hsa-miR-6873-3p	0.00356292	1.58305	0.892704	0.929786
hsa-miR-487a-3p	0.00905051	-2.29887	0.895333	0.931807
hsa-miR-4714-5p	0.00945569	-3.19175	0.898974	0.934878
hsa-miR-3187-5p	-0.0160112	-4.02611	0.90033	0.935265
hsa-miR-4664-5p	0.010581	-3.38272	0.900728	0.935265
hsa-miR-3913-5p	-0.00562388	-0.695186	0.907972	0.941726
hsa-miR-1321	0.0142315	-3.87888	0.908341	0.941726
hsa-miR-3960	0.00481284	4.71014	0.916149	0.949087
hsa-miR-10397-5p	0.00643978	-2.48154	0.916844	0.949087
hsa-miR-1908-3p	0.00881881	-3.47959	0.920233	0.951868
hsa-miR-146b-3p	-0.00288042	0.726088	0.925918	0.956464
hsa-miR-5581-3p	0.00235247	2.00518	0.926089	0.956464
hsa-miR-7851-3p	-0.00683957	-2.71921	0.927432	0.957121
hsa-miR-629-5p	0.00246018	7.29014	0.928589	0.957586
hsa-miR-28-3p	0.00264575	4.63637	0.93027	0.958588
hsa-miR-766-5p	-0.00623897	-2.88752	0.932184	0.958627
hsa-miR-139-5p	-0.00335102	3.56243	0.932318	0.958627
hsa-miR-1273c	0.00270017	-0.050157	0.932431	0.958627
hsa-miR-4436a	0.00980875	-4.03343	0.9356	0.961155
hsa-miR-4724-5p	-0.00973484	-4.08287	0.936471	0.96132
hsa-miR-422a	0.00344942	-2.26376	0.941974	0.965252
hsa-miR-133b	-0.00625944	-3.45509	0.942204	0.965252
hsa-miR-3176	-0.0043834	-1.94761	0.942439	0.965252
hsa-miR-5587-3p	-0.00568918	-3.38492	0.946996	0.969186
hsa-let-7i-3p	0.00207727	0.974558	0.950412	0.971543
hsa-miR-6882-5p	-0.00254434	-1.04709	0.950904	0.971543
hsa-miR-147b-3p	0.00757702	-4.08916	0.951452	0.971543
hsa-miR-769-3p	-0.00233471	-0.816751	0.954889	0.974318
hsa-miR-12136	0.0018977	-0.260155	0.960206	0.978468
hsa-miR-3149	0.00762858	-4.07017	0.960402	0.978468
hsa-miR-6845-5p	0.00608713	-4.08504	0.961292	0.978638
hsa-miR-329-3p	0.00246951	2.74661	0.962616	0.979243
hsa-miR-1323	-0.00276666	-4.05656	0.963332	0.979243
hsa-miR-223-3p	-0.00121387	12.8104	0.964293	0.979335
hsa-miR-3121-3p	0.0030642	-2.86856	0.96487	0.979335
hsa-miR-7850-5p	-0.00530571	-3.87925	0.965763	0.979508
hsa-miR-5701	-0.00445505	-3.41541	0.967321	0.979659
hsa-miR-3183	-0.00505086	-4.12515	0.967359	0.979659
hsa-miR-200b-5p	-0.00383098	-3.22497	0.969465	0.980584
hsa-miR-381-3p	-0.00363222	-2.66654	0.969721	0.980584
hsa-miR-483-5p	0.00211034	-2.94797	0.976767	0.986972
hsa-miR-222-5p	0.00274531	-4.11327	0.978063	0.987544
hsa-miR-4747-3p	0.00131093	-2.05962	0.981262	0.990036
hsa-miR-30c-1-3p	-0.000679973	0.936971	0.982081	0.990125
hsa-miR-4799-5p	0.00197662	-3.14866	0.98309	0.990405
hsa-miR-7843-3p	0.00183263	-3.41167	0.986216	0.991954
hsa-miR-7849-3p	-0.00249627	-3.87855	0.986422	0.991954
hsa-miR-4492	0.000881749	-1.52393	0.986826	0.991954
hsa-miR-4317	0.00136081	-4.00994	0.990327	0.994735
hsa-miR-4733-5p	0.00160813	-4.00857	0.991292	0.994966
hsa-miR-30d-5p	-6.29693e-05	12.9503	0.997619	1
hsa-miR-874-5p	8.77683e-05	-1.18003	0.998043	1
hsa-miR-204-5p	-0.000196117	0.346873	0.998595	1
hsa-miR-624-3p	-0.773309	-3.22429	1	1
hsa-miR-374a-3p	-0.489372	-2.78543	1	1

## Sheet: Severe Stage
ID	logFC	AveExpr	P.Value	adj.P.Val
hsa-miR-4784	1.15369	-2.73107	1.73754e-28	2.35263e-25
hsa-miR-1262	0.993474	-3.37881	1.15061e-18	6.02543e-16
hsa-miR-183-5p	-0.71751	8.12605	1.33503e-18	6.02543e-16
hsa-miR-6881-3p	0.269344	3.55797	3.02069e-12	1.0225e-09
hsa-miR-424-5p	-0.746126	-0.220736	6.57027e-12	1.77923e-09
hsa-miR-106a-5p	-0.441236	5.30617	8.85677e-12	1.99868e-09
hsa-miR-20b-5p	-0.467461	5.07394	1.14316e-11	2.1004e-09
hsa-miR-140-5p	-0.554593	0.298238	1.241e-11	2.1004e-09
hsa-miR-532-5p	-0.277341	7.73273	1.98009e-11	2.97894e-09
hsa-miR-15a-5p	-0.695045	5.93876	2.59444e-11	3.51287e-09
hsa-miR-17-5p	-0.467883	6.86104	3.33309e-11	4.10273e-09
hsa-miR-548k	-0.651721	-1.17218	2.03578e-10	2.29704e-08
hsa-miR-29c-3p	-0.493732	2.54152	3.23766e-10	3.37215e-08
hsa-miR-598-3p	-0.521899	-0.334177	6.21496e-10	6.01076e-08
hsa-miR-624-5p	-0.648407	-0.72294	8.34357e-10	7.53146e-08
hsa-miR-20a-5p	-0.546575	5.86625	1.83522e-09	1.55305e-07
hsa-miR-16-5p	-0.472179	9.97691	2.56412e-09	2.00943e-07
hsa-miR-27a-3p	-0.396047	3.58984	2.67132e-09	2.00943e-07
hsa-miR-96-5p	-0.635819	3.39963	3.00862e-09	2.10822e-07
hsa-miR-1180-3p	0.181275	7.19636	3.11406e-09	2.10822e-07
hsa-miR-548ab	-0.696174	-1.49063	3.73707e-09	2.40952e-07
hsa-miR-27b-3p	-0.414133	3.99717	4.15459e-09	2.55696e-07
hsa-miR-660-5p	-0.378008	4.33531	6.59431e-09	3.74465e-07
hsa-miR-103a-3p	-0.290196	10.9525	6.63749e-09	3.74465e-07
hsa-miR-301a-3p	-0.676626	-2.01819	7.39014e-09	3.91449e-07
hsa-miR-107	-0.326071	8.95475	7.51675e-09	3.91449e-07
hsa-miR-548az-5p	-0.597902	-1.01298	9.18565e-09	4.60643e-07
hsa-miR-6842-3p	0.22089	3.55459	9.52887e-09	4.60789e-07
hsa-miR-21-5p	-0.543788	7.32673	1.05771e-08	4.93842e-07
hsa-miR-106b-5p	-0.395157	8.20481	1.1421e-08	5.15469e-07
hsa-miR-6802-3p	0.17018	3.16335	1.48722e-08	6.40596e-07
hsa-miR-26b-5p	-0.489044	8.68246	1.51396e-08	6.40596e-07
hsa-miR-636	0.175309	5.09078	1.80238e-08	7.18798e-07
hsa-miR-148a-3p	-0.394781	6.90018	1.80496e-08	7.18798e-07
hsa-miR-548au-5p	-0.625553	-0.739753	2.20962e-08	8.54808e-07
hsa-miR-450b-5p	-0.653051	-1.93368	3.01544e-08	1.08541e-06
hsa-miR-126-3p	-0.576555	5.1027	3.02878e-08	1.08541e-06
hsa-miR-18a-5p	-0.50253	2.90141	3.10763e-08	1.08541e-06
hsa-miR-33a-3p	-0.720993	-3.33618	3.12635e-08	1.08541e-06
hsa-miR-6859-3p	0.196312	2.01577	3.47871e-08	1.17754e-06
hsa-miR-17-3p	-0.264865	3.9461	3.84606e-08	1.27014e-06
hsa-miR-1976	0.200585	7.46756	3.94968e-08	1.2733e-06
hsa-miR-548ak	-0.676065	-2.80611	4.2152e-08	1.3273e-06
hsa-miR-130a-3p	-0.298197	3.90132	4.96333e-08	1.52735e-06
hsa-miR-199a-3p	-0.599926	1.07048	5.30264e-08	1.59199e-06
hsa-miR-6748-3p	0.25188	0.19489	5.41833e-08	1.59199e-06
hsa-miR-199b-3p	-0.599775	1.06535	5.52612e-08	1.59199e-06
hsa-miR-342-5p	0.169266	4.67947	5.95311e-08	1.67927e-06
hsa-miR-548t-3p	-0.334011	1.89605	6.94134e-08	1.88104e-06
hsa-miR-24-3p	-0.200742	6.4919	6.94623e-08	1.88104e-06
hsa-miR-548aa	-0.330987	1.91662	8.5812e-08	2.24469e-06
hsa-miR-582-5p	-0.579187	-2.388	8.62069e-08	2.24469e-06
hsa-miR-6859-5p	0.213355	1.12858	8.94068e-08	2.28409e-06
hsa-miR-182-5p	-0.34251	12.0085	1.03639e-07	2.59866e-06
hsa-miR-342-3p	0.143682	8.32619	1.23998e-07	3.05261e-06
hsa-miR-6883-3p	0.233002	1.37033	1.36789e-07	3.30737e-06
hsa-miR-4755-5p	0.159836	2.80048	1.64419e-07	3.90568e-06
hsa-miR-29b-2-5p	-0.22623	4.36198	1.71337e-07	3.99983e-06
hsa-miR-195-5p	-0.41968	-0.862069	1.91482e-07	4.33958e-06
hsa-miR-144-5p	-0.676879	6.42086	1.923e-07	4.33958e-06
hsa-miR-6885-3p	0.169248	2.92485	2.07119e-07	4.59737e-06
hsa-miR-30e-5p	-0.323572	7.50798	2.15818e-07	4.71318e-06
hsa-miR-548d-5p	-0.593351	-0.0270945	2.47648e-07	5.32246e-06
hsa-miR-101-3p	-0.575797	5.87373	2.58501e-07	5.46891e-06
hsa-miR-361-3p	0.144837	7.99713	2.78904e-07	5.80979e-06
hsa-miR-454-3p	-0.405437	4.48117	2.94813e-07	6.04814e-06
hsa-miR-548ay-5p	-0.5839	0.0371806	3.00971e-07	6.08231e-06
hsa-miR-29b-3p	-0.386742	3.89231	3.51996e-07	7.00885e-06
hsa-miR-6787-3p	0.332233	-1.52836	4.0216e-07	7.89166e-06
hsa-miR-340-5p	-0.379737	2.79008	4.10718e-07	7.94446e-06
hsa-miR-6749-3p	0.187861	4.73034	5.32286e-07	1.01509e-05
hsa-miR-548at-5p	-0.419641	-0.346016	5.519e-07	1.03788e-05
hsa-miR-4433a-5p	0.379407	2.13848	6.83774e-07	1.26826e-05
hsa-let-7f-5p	-0.32382	10.7931	8.6457e-07	1.58193e-05
hsa-miR-200b-3p	-0.509376	-2.03822	8.8223e-07	1.59272e-05
hsa-miR-190a-5p	-0.532594	0.826915	9.48834e-07	1.68688e-05
hsa-miR-6754-3p	0.238335	0.272103	9.59306e-07	1.68688e-05
hsa-miR-6866-3p	0.173084	0.974851	1.29553e-06	2.2489e-05
hsa-let-7g-5p	-0.328336	9.71128	1.35301e-06	2.31896e-05
hsa-miR-412-3p	0.732007	-3.47758	1.3782e-06	2.3326e-05
hsa-miR-376c-3p	-0.472868	-1.97992	1.52554e-06	2.55011e-05
hsa-miR-6793-3p	0.171431	3.51817	1.5734e-06	2.59803e-05
hsa-miR-6729-3p	0.236973	1.52077	1.63954e-06	2.67463e-05
hsa-miR-1285-5p	0.14091	3.6456	1.67436e-06	2.69891e-05
hsa-miR-671-3p	0.176274	2.80124	1.69758e-06	2.70415e-05
hsa-miR-18b-5p	-0.48193	-1.22211	1.73976e-06	2.73912e-05
hsa-miR-499a-5p	-0.625135	-3.31233	1.77884e-06	2.76845e-05
hsa-miR-2110	0.175354	6.27812	1.80559e-06	2.77814e-05
hsa-miR-98-5p	-0.327691	4.88718	1.83022e-06	2.78441e-05
hsa-miR-423-5p	0.159996	12.7025	2.04712e-06	3.07979e-05
hsa-miR-3143	-0.369396	-0.216469	2.21303e-06	3.2928e-05
hsa-miR-126-5p	-0.660594	3.34666	2.78056e-06	4.09226e-05
hsa-miR-579-3p	-0.510199	-2.57217	3.50601e-06	5.10445e-05
hsa-miR-6786-3p	0.157502	2.34696	3.80076e-06	5.47471e-05
hsa-miR-6791-3p	0.182245	0.572184	4.41551e-06	6.29327e-05
hsa-miR-548b-5p	-0.460478	-2.27541	5.40401e-06	7.62191e-05
hsa-miR-484	0.108668	12.9432	6.60805e-06	9.22402e-05
hsa-miR-6817-3p	0.204755	1.16605	6.82111e-06	9.42427e-05
hsa-miR-651-5p	-0.609937	-3.16108	7.78921e-06	0.000106531
hsa-miR-628-3p	-0.233302	2.86576	7.93013e-06	0.000107374
hsa-miR-196b-5p	-0.367953	1.468	8.65238e-06	0.000115993
hsa-miR-548bc	-0.484787	-2.87995	9.54428e-06	0.000126696
hsa-miR-19a-3p	-0.418726	2.35204	1.03427e-05	0.000135961
hsa-miR-106a-3p	-0.482816	-2.74317	1.15494e-05	0.000150364
hsa-miR-30a-3p	-0.372511	-0.126916	1.22086e-05	0.000155271
hsa-miR-3140-3p	-0.225941	0.620803	1.22688e-05	0.000155271
hsa-miR-548am-5p	-0.507541	-1.7222	1.22703e-05	0.000155271
hsa-miR-221-5p	-0.31443	-0.23049	1.32575e-05	0.000165908
hsa-miR-1238-3p	0.211305	0.166895	1.3356e-05	0.000165908
hsa-miR-374b-3p	-0.50262	-3.03617	1.5109e-05	0.000185544
hsa-miR-548o-5p	-0.494414	-1.66142	1.52944e-05	0.000185544
hsa-miR-548c-5p	-0.494384	-1.66168	1.53478e-05	0.000185544
hsa-miR-215-5p	-0.254213	1.80113	1.62457e-05	0.000194661
hsa-miR-5582-3p	-0.382856	-1.55271	1.76485e-05	0.000209614
hsa-miR-374c-5p	-0.424975	0.637801	1.84144e-05	0.00021681
hsa-miR-19b-3p	-0.299358	7.23016	1.87549e-05	0.000218915
hsa-miR-3127-3p	0.180561	1.63804	1.96315e-05	0.000227189
hsa-miR-486-5p	0.149059	19.0188	2.09649e-05	0.000240563
hsa-miR-4732-3p	0.137218	8.98195	2.20852e-05	0.000251288
hsa-miR-629-3p	0.142623	1.99249	2.30365e-05	0.000259928
hsa-miR-548e-3p	-0.281292	0.808321	2.48208e-05	0.000277747
hsa-miR-148b-3p	-0.206945	7.03787	2.91628e-05	0.000323659
hsa-miR-548ar-5p	-0.595479	-3.52335	3.10013e-05	0.000340608
hsa-miR-889-3p	-0.843126	-4.08301	3.11931e-05	0.000340608
hsa-miR-4685-3p	0.169255	7.23841	3.40566e-05	0.000368901
hsa-miR-3157-5p	-0.192217	0.578449	3.48746e-05	0.000374764
hsa-miR-10401-3p	0.159129	4.31646	3.52109e-05	0.000375398
hsa-miR-548ae-5p	-0.491054	-0.574617	3.55263e-05	0.000375801
hsa-miR-532-3p	0.10891	8.41872	3.58772e-05	0.000376571
hsa-miR-93-5p	-0.231196	10.4129	3.86197e-05	0.000402239
hsa-miR-548h-5p	-0.557712	-3.45024	3.96508e-05	0.000409825
hsa-miR-6783-3p	0.190967	2.48101	4.12393e-05	0.000423015
hsa-miR-23b-3p	-0.152092	8.37365	4.39235e-05	0.000447161
hsa-miR-486-3p	-0.45031	0.609105	4.45979e-05	0.000450639
hsa-miR-223-5p	-0.339936	-0.13601	4.67686e-05	0.000469071
hsa-miR-101-5p	-0.434973	-2.11666	4.91812e-05	0.000489642
hsa-miR-6721-5p	0.184961	1.57544	5.23533e-05	0.000517418
hsa-miR-6511b-3p	0.171866	5.63994	5.38978e-05	0.000525501
hsa-miR-7-5p	-0.2814	5.41634	5.39473e-05	0.000525501
hsa-miR-6836-3p	0.180132	0.764879	5.57172e-05	0.000538865
hsa-miR-548e-5p	-0.370072	-2.6001	5.62679e-05	0.000539608
hsa-miR-374b-5p	-0.386574	5.40625	5.68811e-05	0.000539608
hsa-miR-4775	-0.510792	-3.29559	5.70092e-05	0.000539608
hsa-miR-6833-3p	0.129211	4.24418	5.73881e-05	0.000539608
hsa-miR-328-3p	0.133193	8.46517	5.96244e-05	0.000556768
hsa-miR-548g-5p	-0.563693	-3.50163	6.49389e-05	0.000602241
hsa-miR-30e-3p	-0.242244	5.75029	6.58744e-05	0.000605684
hsa-miR-450a-5p	-0.349971	0.432884	6.62047e-05	0.000605684
hsa-miR-369-3p	-0.531148	-2.81165	7.03144e-05	0.000638964
hsa-miR-363-3p	-0.242232	8.59661	7.18014e-05	0.000647806
hsa-miR-548x-5p	-0.560873	-3.5048	7.22443e-05	0.000647806
hsa-miR-548al	-0.366852	-2.40039	7.49897e-05	0.000668001
hsa-miR-548l	-0.396551	-1.40238	7.75115e-05	0.000685952
hsa-miR-4749-3p	0.211471	-0.0687639	8.2016e-05	0.000721102
hsa-miR-7113-3p	0.208397	-0.301478	8.29284e-05	0.000724419
hsa-miR-570-3p	-0.405244	-2.40392	8.54285e-05	0.000741475
hsa-miR-542-3p	-0.538833	-3.51749	9.10749e-05	0.000782614
hsa-miR-4646-3p	0.146229	4.64702	9.13243e-05	0.000782614
hsa-miR-106b-3p	-0.157998	9.41437	9.40992e-05	0.000801322
hsa-miR-32-3p	-0.445236	-2.26694	9.64379e-05	0.000815542
hsa-miR-548aj-5p	-0.548729	-3.5016	9.69736e-05	0.000815542
hsa-miR-3942-5p	-0.598104	-3.79077	9.76209e-05	0.000815918
hsa-miR-4728-3p	0.186698	0.428383	0.000108724	0.00090314
hsa-miR-6750-5p	0.194156	-0.293953	0.000111928	0.000924089
hsa-miR-6820-3p	0.126736	1.55349	0.000112787	0.000925533
hsa-miR-146b-5p	-0.206362	4.58356	0.000120277	0.000981058
hsa-miR-4632-3p	0.270097	-1.28786	0.000127548	0.00103413
hsa-miR-374a-5p	-0.47225	1.34581	0.000134952	0.00108765
hsa-miR-142-5p	-0.259685	9.8938	0.000141249	0.00113019
hsa-miR-548f-5p	-0.55007	-3.56189	0.0001419	0.00113019
hsa-miR-3605-3p	0.130045	6.42385	0.000143947	0.00113979
hsa-miR-320c	0.174308	4.94231	0.000148248	0.00116702
hsa-miR-3615	0.124706	9.96726	0.000157725	0.00123445
hsa-miR-548bb-3p	-0.669749	-4.05371	0.00016164	0.00125782
hsa-miR-487a-5p	0.365985	-2.19304	0.000177561	0.00137382
hsa-miR-6726-3p	0.16979	4.58676	0.0001889	0.00145324
hsa-miR-548am-3p	-0.240023	-0.797987	0.000196799	0.00150546
hsa-miR-548av-3p	-0.219572	-0.178244	0.000206285	0.00156819
hsa-miR-362-3p	-0.347138	-0.125661	0.000207316	0.00156819
hsa-miR-320b	0.151938	6.95752	0.00021634	0.00162736
hsa-miR-20a-3p	-0.394714	-2.82012	0.000218514	0.00163463
hsa-miR-1343-3p	0.171239	2.02538	0.000231539	0.0017193
hsa-miR-7848-3p	0.251608	-1.51379	0.000233595	0.0017193
hsa-miR-6511a-3p	0.157966	5.96246	0.000233642	0.0017193
hsa-miR-145-5p	0.139742	5.12386	0.000240399	0.00175946
hsa-miR-1468-5p	0.158107	2.38069	0.000246476	0.00179424
hsa-miR-1538	0.146091	1.17189	0.000249938	0.00180971
hsa-miR-337-3p	-0.306875	1.40551	0.000254972	0.00183634
hsa-miR-7110-3p	0.226345	-0.242958	0.000273038	0.00195605
hsa-miR-451a	-0.19222	17.2822	0.000289024	0.00205967
hsa-miR-151b	0.113054	8.21474	0.000293729	0.00208225
hsa-miR-26a-5p	-0.211771	12.0024	0.000305767	0.00215629
hsa-miR-15b-3p	-0.180386	7.61367	0.000318198	0.00221768
hsa-miR-1233-3p	0.173386	-0.0603234	0.000319138	0.00221768
hsa-miR-548ai	-0.736426	-4.15537	0.000319385	0.00221768
hsa-miR-548ah-3p	-0.221694	-0.546929	0.000323194	0.00223267
hsa-miR-185-3p	0.126179	4.51298	0.000348873	0.00239784
hsa-miR-4497	-0.302514	-0.74369	0.000352575	0.00241104
hsa-miR-570-5p	-0.727708	-4.15515	0.000367884	0.00250098
hsa-miR-451b	-0.225455	-0.405214	0.000369422	0.00250098
hsa-miR-423-3p	0.112006	10.6652	0.000372203	0.00250728
hsa-miR-939-5p	0.169663	1.60226	0.000374576	0.00251077
hsa-miR-15b-5p	-0.261669	10.4993	0.000388991	0.00259455
hsa-miR-4433b-5p	0.229954	6.31044	0.000399253	0.00264994
hsa-miR-590-5p	-0.504383	-3.65144	0.000414815	0.0027398
hsa-miR-4695-3p	0.181443	0.393805	0.00042268	0.0027782
hsa-miR-6812-3p	0.133965	1.80171	0.000428758	0.00280453
hsa-miR-3074-3p	-0.284818	-2.01489	0.000442779	0.00288232
hsa-miR-6775-3p	0.148272	0.902855	0.000459275	0.0029754
hsa-miR-548aq-3p	-0.295011	-1.58312	0.000508715	0.00326989
hsa-miR-548d-3p	-0.235575	-0.41519	0.000509561	0.00326989
hsa-miR-197-3p	0.116035	8.1144	0.000530843	0.00339038
hsa-miR-1306-5p	0.150174	7.46111	0.000533954	0.00339424
hsa-miR-6806-3p	0.166214	1.44195	0.00054374	0.0034403
hsa-miR-210-5p	0.150598	3.01969	0.000569531	0.00358335
hsa-miR-548aj-3p	-0.557031	-3.89289	0.000571643	0.00358335
hsa-miR-493-5p	-0.347224	-0.566523	0.000574814	0.00358663
hsa-miR-6741-3p	0.124074	3.16243	0.000614651	0.00381127
hsa-miR-4772-3p	0.252208	1.92202	0.000616447	0.00381127
hsa-miR-503-5p	-0.162829	5.01765	0.000639243	0.00393425
hsa-miR-6804-3p	0.171567	-0.261959	0.000644996	0.0039416
hsa-miR-132-5p	-0.179974	-0.00983856	0.00064626	0.0039416
hsa-miR-545-5p	-0.355494	-2.40618	0.00065139	0.00395507
hsa-miR-6879-3p	0.136178	1.41961	0.000664162	0.00401462
hsa-miR-3691-5p	0.142139	0.547827	0.000667525	0.00401702
hsa-miR-4687-3p	0.558809	-3.97686	0.000675255	0.00404555
hsa-miR-5003-5p	-0.616344	-4.09006	0.000719215	0.00428995
hsa-miR-152-3p	-0.169046	1.72563	0.000727279	0.00431902
hsa-miR-4700-5p	0.626798	-4.09966	0.000739781	0.00437232
hsa-miR-324-3p	0.0907496	7.21234	0.000742713	0.00437232
hsa-miR-224-5p	-0.284197	0.0583628	0.000782839	0.00458859
hsa-miR-3150a-5p	0.118593	1.03807	0.000827109	0.00481162
hsa-miR-487b-3p	-0.258648	0.931333	0.000827996	0.00481162
hsa-miR-4525	0.370065	-2.69005	0.000844291	0.00488145
hsa-miR-4753-5p	0.150324	0.54956	0.000849166	0.00488145
hsa-miR-196a-5p	-0.456861	-2.49417	0.000850829	0.00488145
hsa-miR-379-5p	-0.376415	-2.79652	0.00085625	0.00489183
hsa-miR-192-5p	-0.161111	8.79404	0.00093476	0.00531792
hsa-miR-6803-3p	0.15686	7.09309	0.000941239	0.00533238
hsa-miR-3138	0.200027	-0.448873	0.000947863	0.00534753
hsa-miR-3127-5p	0.145018	0.405681	0.000970538	0.00545273
hsa-miR-548p	-0.210179	-0.817134	0.00107507	0.00601464
hsa-miR-143-3p	-0.225128	3.45066	0.00107944	0.00601464
hsa-miR-22-5p	-0.131703	5.01122	0.00108571	0.00602481
hsa-miR-642a-5p	0.179063	0.345254	0.00109388	0.00604537
hsa-miR-4731-5p	0.172462	-0.319783	0.00113683	0.00625718
hsa-miR-376a-3p	-0.298626	-1.35925	0.00117799	0.0064575
hsa-miR-548ae-3p	-0.369747	-3.13655	0.00120198	0.00656241
hsa-miR-3120-5p	0.442833	-3.6224	0.00120801	0.00656885
hsa-miR-4448	-0.124329	2.0966	0.00124637	0.00673941
hsa-miR-22-3p	0.134475	9.46497	0.00124933	0.00673941
hsa-miR-4423-3p	-0.707188	-4.19964	0.00126599	0.00680216
hsa-miR-194-5p	-0.187078	5.45533	0.00128918	0.00688461
hsa-miR-485-3p	0.236643	4.53807	0.0012915	0.00688461
hsa-miR-6747-3p	0.139453	5.112	0.00130821	0.00694632
hsa-miR-1227-3p	0.116517	3.56301	0.00143801	0.00760573
hsa-miR-766-3p	0.10132	4.00227	0.00147061	0.00774789
hsa-miR-584-3p	0.135505	1.86206	0.00148606	0.00779891
hsa-miR-5100	-0.142154	5.28758	0.00149991	0.00783138
hsa-miR-181c-5p	-0.197715	-0.159066	0.00150381	0.00783138
hsa-miR-4745-3p	0.144017	0.388123	0.00154025	0.00799039
hsa-miR-4667-5p	0.207768	-1.38392	0.00156714	0.00809891
hsa-miR-6820-5p	0.313222	-3.00559	0.0015807	0.0081379
hsa-miR-6777-3p	0.130764	3.54858	0.00160621	0.00823789
hsa-miR-378a-5p	0.126707	5.82332	0.00167129	0.00853935
hsa-miR-150-5p	0.0991158	11.1436	0.00171113	0.00871003
hsa-miR-331-5p	-0.14457	2.34385	0.00174311	0.00883958
hsa-miR-4286	0.105848	5.00873	0.00179493	0.00906844
hsa-miR-642b-5p	0.227389	-1.44918	0.00180979	0.00910952
hsa-miR-19b-1-5p	-0.333598	-3.00774	0.00182413	0.00914768
hsa-miR-3620-3p	0.121944	3.6337	0.00183348	0.00916064
hsa-miR-6882-3p	0.165296	0.809668	0.00184998	0.00920911
hsa-miR-584-5p	-0.152181	7.03058	0.00191396	0.00949269
hsa-miR-320e	0.159265	3.23885	0.00201994	0.00997299
hsa-miR-3173-5p	0.114253	6.46493	0.00202553	0.00997299
hsa-miR-4669	0.443238	-0.713564	0.00209876	0.0102961
hsa-miR-942-3p	0.121783	1.81794	0.00212058	0.0103656
hsa-miR-24-2-5p	-0.198178	-0.943596	0.00213694	0.010408
hsa-miR-6780a-5p	0.177448	0.296232	0.00215524	0.0104595
hsa-miR-3180-5p	0.205841	-1.01496	0.00218767	0.0105789
hsa-miR-4732-5p	0.12675	5.64955	0.00222192	0.0107063
hsa-miR-3200-3p	0.120304	4.39634	0.0022439	0.0107739
hsa-miR-130b-5p	0.0835804	8.07359	0.00238762	0.0114195
hsa-miR-508-5p	-0.536975	-3.93943	0.00239831	0.0114195
hsa-miR-98-3p	-0.285403	-0.863625	0.00240367	0.0114195
hsa-miR-20b-3p	-0.231695	-1.19634	0.00245187	0.0115913
hsa-miR-9-3p	-0.257921	-1.8989	0.00245695	0.0115913
hsa-miR-6516-5p	-0.237902	-1.74659	0.00248635	0.0116893
hsa-miR-4443	-0.18342	2.99517	0.00258391	0.0121059
hsa-miR-4685-5p	0.538528	-3.99061	0.00267068	0.0124693
hsa-miR-1226-3p	0.101325	4.12952	0.00278102	0.0129398
hsa-miR-3140-5p	-0.228561	-1.65521	0.00293223	0.0135967
hsa-miR-135a-2-3p	-0.40954	-3.69397	0.00297666	0.0137415
hsa-miR-7155-3p	0.110223	1.28249	0.00298984	0.0137415
hsa-miR-885-5p	0.188027	-0.566475	0.00299389	0.0137415
hsa-miR-6766-3p	0.123103	0.778617	0.00305948	0.0139951
hsa-miR-6750-3p	0.121027	1.49433	0.00311426	0.0141977
hsa-miR-99a-5p	-0.155402	4.40625	0.00322506	0.0146535
hsa-miR-3128	-0.198463	-0.690868	0.00325292	0.0147306
hsa-miR-6873-5p	0.26684	-2.45872	0.00328181	0.0148119
hsa-miR-142-3p	-0.261457	4.88268	0.00335417	0.0150882
hsa-miR-3944-3p	0.209755	-1.84731	0.00336597	0.0150911
hsa-miR-125a-5p	0.110047	7.76939	0.00341437	0.015231
hsa-miR-6779-3p	0.303103	-2.97963	0.00341966	0.015231
hsa-miR-5193	0.122388	0.657025	0.00348833	0.0154859
hsa-miR-6778-3p	0.31664	-3.15774	0.00354747	0.015697
hsa-miR-6727-5p	-0.544806	-4.01184	0.00357999	0.0157893
hsa-miR-1178-3p	0.191147	-1.40833	0.00373926	0.0164382
hsa-miR-29a-3p	-0.132775	5.12223	0.00377182	0.0164891
hsa-miR-615-3p	0.39057	-3.522	0.0037752	0.0164891
hsa-miR-320d	0.128676	3.56514	0.00386854	0.0168425
hsa-miR-27b-5p	-0.218706	-1.86367	0.00389166	0.0168888
hsa-miR-1307-5p	-0.160794	0.657391	0.00403158	0.0174401
hsa-miR-4667-3p	0.193312	-1.5176	0.00404874	0.0174586
hsa-miR-34b-3p	0.273069	-2.71315	0.00411226	0.0176762
hsa-miR-6782-3p	0.102861	0.738785	0.00419574	0.0179426
hsa-miR-3136-5p	-0.265722	-2.59352	0.00420819	0.0179426
hsa-miR-6798-3p	0.128273	1.55071	0.004214	0.0179426
hsa-miR-132-3p	-0.115796	4.43922	0.00424058	0.0179677
hsa-miR-3125	-0.411947	-3.2468	0.00424644	0.0179677
hsa-miR-548j-5p	-0.253316	-0.780523	0.00427081	0.0180146
hsa-miR-4725-3p	0.39226	-3.66159	0.00430309	0.0180944
hsa-miR-1273h-3p	0.103808	1.52229	0.00439897	0.0184403
hsa-miR-548o-3p	-0.144853	2.60758	0.00445381	0.0186125
hsa-miR-382-3p	-0.274681	-1.45201	0.00448327	0.018678
hsa-miR-4646-5p	0.192325	-0.733936	0.00455382	0.0189137
hsa-let-7d-3p	0.138057	8.78546	0.00469537	0.019442
hsa-miR-378a-3p	-0.112576	7.53756	0.00473256	0.0195362
hsa-miR-1827	-0.32056	-3.65462	0.00479011	0.0196712
hsa-miR-6887-3p	0.247883	-2.05273	0.00479431	0.0196712
hsa-miR-7855-5p	0.135724	0.361464	0.00485616	0.0198488
hsa-miR-3912-3p	-0.537794	-4.11195	0.00486691	0.0198488
hsa-miR-6819-3p	0.1135	1.00808	0.00494332	0.0200649
hsa-miR-6894-3p	0.104872	2.93558	0.00494953	0.0200649
hsa-miR-6813-3p	0.165609	-0.759696	0.00499795	0.0202007
hsa-miR-6857-3p	0.111852	0.600255	0.00507231	0.0204402
hsa-miR-3154	0.356128	-3.43588	0.0053066	0.0213209
hsa-miR-15a-3p	-0.397589	-3.70052	0.00537188	0.0215193
hsa-miR-6764-5p	0.118342	0.0718377	0.00538946	0.021526
hsa-miR-5588-3p	0.17016	-1.35725	0.00544309	0.0216763
hsa-miR-4504	-0.265838	-2.50321	0.00546169	0.0216866
hsa-miR-6738-3p	0.137319	-0.0422163	0.00547934	0.0216931
hsa-miR-4781-3p	0.110157	1.6609	0.00554738	0.0218984
hsa-miR-31-5p	-0.224897	-1.75278	0.00570754	0.0224652
hsa-let-7i-5p	-0.169487	9.63183	0.00577572	0.0226676
hsa-miR-6514-3p	0.0949184	1.98693	0.00605342	0.0236888
hsa-miR-3135a	-0.177152	-0.608633	0.00620427	0.0242092
hsa-miR-6842-5p	0.180818	-1.58848	0.00624451	0.0242962
hsa-miR-548x-3p	-0.47077	-4.11532	0.00630543	0.0244488
hsa-miR-4677-3p	-0.146159	1.46222	0.00633	0.0244488
hsa-miR-1278	-0.573362	-4.18113	0.00633792	0.0244488
hsa-let-7a-3p	-0.212607	3.87113	0.00636287	0.0244754
hsa-miR-576-3p	-0.190984	2.20567	0.00655693	0.0251504
hsa-miR-4485-3p	-0.429737	-3.559	0.00665163	0.025385
hsa-miR-6515-5p	0.21809	-2.33753	0.00665559	0.025385
hsa-miR-500a-3p	-0.102526	6.77818	0.00667984	0.0254059
hsa-let-7e-5p	-0.143093	5.62394	0.00672345	0.0255001
hsa-miR-1229-3p	0.116148	3.68063	0.00677503	0.025624
hsa-miR-6743-3p	0.131155	1.7035	0.00687677	0.0259363
hsa-miR-122-5p	-0.251859	0.892592	0.00705922	0.0265505
hsa-miR-574-3p	0.0780408	6.88557	0.00714219	0.0267466
hsa-miR-421	-0.110475	5.00565	0.00715087	0.0267466
hsa-miR-21-3p	-0.200944	-1.6372	0.00718586	0.0268034
hsa-miR-371b-5p	0.129886	-0.352542	0.00721275	0.0268299
hsa-miR-6825-5p	-0.328708	-2.49285	0.00736318	0.0273144
hsa-miR-660-3p	0.116155	1.65052	0.00742225	0.0274583
hsa-miR-135a-5p	-0.234704	-1.60261	0.0075969	0.0280278
hsa-miR-4301	0.135721	1.9051	0.00764446	0.0281266
hsa-miR-655-3p	-0.30464	-2.68761	0.0078655	0.0288615
hsa-miR-3150a-3p	0.172007	-1.47855	0.00802998	0.0293854
hsa-miR-23a-3p	-0.0911853	10.2684	0.00808179	0.0293927
hsa-miR-425-3p	-0.0726721	4.88658	0.00808995	0.0293927
hsa-miR-642a-3p	0.192238	-1.64734	0.00809709	0.0293927
hsa-miR-3684	-0.363909	-3.62013	0.00819354	0.0296214
hsa-miR-6799-3p	0.141569	0.0575068	0.00820386	0.0296214
hsa-miR-6511b-5p	0.117373	0.121934	0.00847278	0.030511
hsa-miR-520g-3p	0.627141	-4.17969	0.00858544	0.0308347
hsa-miR-28-3p	0.111668	4.63637	0.00871073	0.0312019
hsa-miR-2115-5p	0.19778	-2.04956	0.00875615	0.0312442
hsa-miR-4755-3p	0.142834	-1.04285	0.00878684	0.0312442
hsa-miR-3944-5p	0.102879	0.888018	0.00879174	0.0312442
hsa-miR-338-5p	-0.164433	0.463613	0.00883126	0.0313024
hsa-miR-202-5p	-0.275016	-0.847273	0.00887158	0.0313633
hsa-miR-652-5p	-0.248313	-2.10462	0.00902037	0.0318062
hsa-miR-33b-5p	-0.518767	-4.15312	0.00905304	0.0318385
hsa-miR-3064-3p	-0.190629	-1.15961	0.00913681	0.0319329
hsa-miR-548n	-0.491948	-4.14963	0.00913975	0.0319329
hsa-miR-409-3p	0.18283	5.44544	0.00915065	0.0319329
hsa-miR-23c	-0.148534	-0.154252	0.00939683	0.0327077
hsa-miR-203a-3p	-0.460905	-3.02342	0.00956896	0.0332215
hsa-miR-210-3p	-0.158668	3.79775	0.00981067	0.0339735
hsa-miR-365b-5p	0.197472	-1.96716	0.0100345	0.0346516
hsa-miR-708-5p	-0.326147	-2.87708	0.0100577	0.0346516
hsa-miR-370-5p	-0.537092	-4.15439	0.0102429	0.0352001
hsa-miR-146a-3p	-0.352491	-2.76045	0.0103597	0.0355116
hsa-miR-548ay-3p	-0.130542	1.44579	0.0104944	0.0358823
hsa-miR-6734-3p	0.0971055	4.05696	0.0106062	0.0361735
hsa-miR-18a-3p	0.0623048	7.92054	0.0106953	0.0363854
hsa-miR-3940-5p	-0.534681	-4.11073	0.0107268	0.0364013
hsa-miR-3065-3p	-0.461864	-4.05777	0.0113165	0.0383062
hsa-let-7a-5p	-0.130261	12.9532	0.0114049	0.0385092
hsa-miR-130a-5p	-0.169825	-0.273034	0.0116414	0.0392097
hsa-miR-148b-5p	-0.166327	-0.185045	0.0116702	0.0392097
hsa-miR-320a-3p	0.105087	12.5805	0.0117075	0.0392374
hsa-miR-130b-3p	-0.0862478	5.71272	0.0118798	0.0397167
hsa-miR-641	-0.123375	2.24215	0.0119528	0.0398624
hsa-miR-330-5p	0.102421	2.37345	0.0123624	0.0411272
hsa-miR-6862-5p	0.150458	-1.11321	0.0126042	0.0418286
hsa-miR-4677-5p	-0.207343	-2.0405	0.0128052	0.042392
hsa-miR-3934-5p	-0.226129	-2.17582	0.0129493	0.0427642
hsa-miR-7706	0.0920837	4.13283	0.0134806	0.0444106
hsa-miR-548an	-0.319743	-3.5166	0.0136112	0.0447319
hsa-miR-3159	-0.459368	-4.09703	0.0139844	0.0458471
hsa-miR-4645-3p	-0.223907	-2.54372	0.014052	0.0459576
hsa-miR-6800-3p	0.211595	-2.4207	0.0144362	0.0471003
hsa-miR-191-3p	0.0740827	1.41363	0.0146911	0.0478166
hsa-miR-149-5p	-0.165135	-0.451492	0.0147673	0.0479496
hsa-miR-652-3p	-0.0681997	9.2273	0.0148301	0.0480382
hsa-miR-151a-3p	0.105607	7.91269	0.015126	0.0488797
hsa-miR-32-5p	-0.758915	-1.69932	0.0153235	0.0494002
hsa-miR-6810-3p	0.153529	-0.921253	0.0153942	0.0495102
hsa-miR-6845-3p	0.176463	-1.64723	0.0155211	0.0497998
hsa-miR-6515-3p	0.101772	0.320838	0.0156645	0.0501412
hsa-miR-3680-5p	-0.299468	-3.46937	0.0158449	0.0505148
hsa-miR-193a-5p	0.10137	4.45524	0.0158558	0.0505148
hsa-miR-520h	0.592845	-4.24042	0.016047	0.051004
hsa-miR-4454	-0.0932321	5.0208	0.0161123	0.0510253
hsa-miR-431-5p	-0.201353	-0.614681	0.0161291	0.0510253
hsa-miR-2116-3p	-0.22011	-2.42951	0.0163851	0.0517143
hsa-miR-379-3p	-0.31962	-3.31092	0.0167797	0.0528053
hsa-miR-504-5p	0.188928	0.439821	0.0168088	0.0528053
hsa-miR-1295a	0.470083	-3.81684	0.0170661	0.0534894
hsa-miR-6763-3p	0.212772	-2.38916	0.0172154	0.053833
hsa-miR-664b-3p	0.0742807	3.0129	0.0173408	0.0540584
hsa-miR-548h-3p	-0.180405	3.12548	0.0173674	0.0540584
hsa-miR-1291	-0.260079	-2.98553	0.0176453	0.0547974
hsa-miR-6503-3p	-0.175834	-2.02681	0.017749	0.0549906
hsa-miR-561-5p	-0.46974	-4.18108	0.0177887	0.0549906
hsa-miR-1237-3p	0.127153	-0.548706	0.0179052	0.0552246
hsa-miR-548aw	-0.312687	-3.58066	0.0182739	0.0560673
hsa-miR-548z	-0.179014	3.12762	0.0183215	0.0560673
hsa-miR-362-5p	-0.0937562	5.89672	0.0183604	0.0560673
hsa-miR-30b-5p	-0.116808	9.0043	0.0183795	0.0560673
hsa-miR-2276-3p	-0.147802	-0.990625	0.0183941	0.0560673
hsa-miR-548ac	-0.168309	-1.17815	0.0184268	0.0560673
hsa-miR-502-5p	-0.111308	1.48527	0.0187799	0.0569744
hsa-miR-6762-3p	0.120143	-0.155308	0.0188091	0.0569744
hsa-miR-3192-3p	0.194837	-2.26893	0.0189565	0.0572926
hsa-miR-188-5p	-0.125718	-0.0430127	0.0191099	0.0576277
hsa-miR-34a-5p	0.238092	-1.37299	0.0192108	0.0578032
hsa-miR-6794-3p	0.227703	-2.68799	0.0194623	0.05843
hsa-miR-656-3p	-0.27311	-2.95772	0.0196326	0.058811
hsa-miR-937-3p	0.0960665	2.14631	0.0197592	0.0590594
hsa-miR-1260a	-0.10242	10.2571	0.0198302	0.0591411
hsa-miR-197-5p	0.174315	-1.34281	0.0200753	0.0597406
hsa-miR-6838-5p	0.450257	-4.14655	0.0202496	0.0601272
hsa-miR-4306	-0.100797	1.26181	0.0205014	0.0607415
hsa-miR-1260b	-0.101363	10.2695	0.0206074	0.0609223
hsa-miR-3913-5p	-0.160792	-0.695186	0.0208728	0.0615725
hsa-miR-6885-5p	0.135011	-0.807894	0.0210582	0.0618564
hsa-miR-378c	-0.134144	2.69554	0.0210604	0.0618564
hsa-miR-3074-5p	0.0819605	2.3253	0.0212549	0.0622924
hsa-miR-4668-5p	0.187778	-2.3276	0.0213844	0.0625368
hsa-miR-26a-2-3p	-0.18959	-0.0681558	0.0214809	0.0626834
hsa-miR-6865-3p	0.193525	-2.0928	0.0215277	0.0626849
hsa-miR-1271-5p	-0.105376	2.48223	0.0216453	0.0628922
hsa-miR-4999-5p	-0.349444	-3.81196	0.022152	0.0642156
hsa-miR-7106-3p	0.130444	-1.03165	0.0222023	0.0642156
hsa-let-7c-5p	-0.101074	5.86032	0.0222431	0.0642156
hsa-miR-30d-3p	-0.190866	-1.78436	0.0223983	0.0645148
hsa-miR-1289	-0.19428	-2.53131	0.022442	0.0645148
hsa-miR-6861-3p	0.113251	-0.433999	0.022618	0.0648831
hsa-miR-378i	-0.124301	1.72698	0.0227225	0.0650145
hsa-miR-483-5p	0.286365	-2.94797	0.0227599	0.0650145
hsa-miR-6789-3p	0.155378	-1.66932	0.0228905	0.0652499
hsa-miR-3196	-0.182809	-1.2858	0.0231592	0.0658771
hsa-miR-6737-3p	0.112842	-0.571464	0.0235209	0.0667657
hsa-miR-495-3p	-0.177702	1.31752	0.0235781	0.0667881
hsa-miR-1-3p	-0.311876	-3.12714	0.0238374	0.0672828
hsa-miR-4664-3p	0.252442	-3.33279	0.0238521	0.0672828
hsa-miR-92b-5p	0.112811	1.96177	0.0248431	0.0699326
hsa-miR-6771-5p	0.406549	-4.1058	0.0252542	0.0709424
hsa-let-7f-1-3p	-0.136328	2.21684	0.0257959	0.072314
hsa-miR-6892-3p	0.458127	-4.11864	0.0267916	0.0749185
hsa-miR-877-3p	0.087675	2.22346	0.0268357	0.0749185
hsa-miR-4654	0.454334	-4.22618	0.027031	0.0753085
hsa-miR-221-3p	-0.131613	7.62625	0.0274284	0.0761768
hsa-miR-146a-5p	-0.0915389	5.42472	0.0274552	0.0761768
hsa-miR-9-5p	-0.227468	-1.74606	0.0278414	0.0770905
hsa-miR-539-5p	-0.24916	-2.93938	0.0279991	0.0773688
hsa-miR-6855-3p	0.0873241	0.70377	0.0281449	0.0776134
hsa-miR-7-1-3p	-0.119158	3.45928	0.0282626	0.0777777
hsa-miR-6752-3p	0.164886	-1.87414	0.0283193	0.0777777
hsa-miR-483-3p	0.202029	1.26182	0.0285472	0.0782448
hsa-miR-6855-5p	0.12212	0.0610102	0.0286846	0.0784627
hsa-miR-200a-3p	-0.479505	-3.89492	0.0288085	0.0786425
hsa-miR-6501-5p	0.120822	0.0526886	0.0290263	0.0790777
hsa-miR-6767-5p	0.0987985	-0.0269979	0.0291153	0.079161
hsa-miR-3202	0.122068	-1.06725	0.0293421	0.0794267
hsa-miR-186-3p	-0.224669	-2.86799	0.0293526	0.0794267
hsa-let-7d-5p	-0.0963268	10.1206	0.029389	0.0794267
hsa-miR-185-5p	-0.0691093	11.5901	0.0294993	0.0795659
hsa-miR-4526	-0.32822	-3.71202	0.0298288	0.0802946
hsa-miR-301a-5p	-0.173698	-1.85904	0.0299128	0.080361
hsa-miR-1321	0.368184	-3.87888	0.0301004	0.0807048
hsa-miR-10a-5p	-0.121158	5.74217	0.0303949	0.0813333
hsa-miR-627-5p	-0.171323	-1.74519	0.0305976	0.0816588
hsa-miR-6880-3p	0.240583	-3.15829	0.0306371	0.0816588
hsa-miR-4659b-3p	0.096754	4.11137	0.0307227	0.0817259
hsa-miR-3130-3p	-0.199539	-2.59771	0.0309986	0.0822981
hsa-miR-6808-3p	0.14201	-1.06187	0.0312401	0.082777
hsa-miR-589-5p	0.067362	4.88267	0.0313306	0.0828549
hsa-miR-628-5p	-0.135236	-0.814864	0.0314919	0.083119
hsa-miR-4637	-0.208855	-2.35291	0.0319719	0.0842217
hsa-miR-4644	0.196147	-2.48002	0.0321197	0.0844468
hsa-miR-4723-3p	0.128384	-0.909522	0.0329338	0.0864193
hsa-miR-3691-3p	0.107813	-0.544847	0.0331256	0.086754
hsa-miR-4660	0.159584	-1.81291	0.0331895	0.086754
hsa-miR-4687-5p	0.111316	-0.0735835	0.0334133	0.0871707
hsa-miR-454-5p	-0.0922592	5.64918	0.0337546	0.0878918
hsa-miR-4672	-0.107392	0.64713	0.034114	0.0886572
hsa-miR-147b-5p	-0.289736	-3.70203	0.0342979	0.0889642
hsa-miR-6727-3p	0.124996	-0.859726	0.0350838	0.0907916
hsa-miR-559	-0.322338	-3.77239	0.0351365	0.0907916
hsa-miR-1303	0.110782	3.12659	0.0355144	0.0915843
hsa-miR-296-3p	0.192184	-2.52241	0.0355785	0.0915843
hsa-miR-10398-3p	0.25668	-3.3812	0.0358591	0.0919811
hsa-miR-1298-5p	-0.478575	-4.25455	0.0358685	0.0919811
hsa-miR-6732-3p	0.1312	-1.24244	0.0365947	0.0936659
hsa-miR-378d	-0.14592	-1.02055	0.0367511	0.0938886
hsa-miR-654-3p	-0.162235	2.35274	0.0371324	0.0946018
hsa-miR-1908-3p	0.261057	-3.47959	0.03717	0.0946018
hsa-miR-3155a	-0.395006	-4.10445	0.0372544	0.0946389
hsa-miR-3158-3p	0.0798674	2.25047	0.037671	0.0955178
hsa-miR-6809-3p	0.194078	-2.4948	0.0392836	0.0994206
hsa-miR-7111-3p	0.127086	-1.02739	0.039667	0.100204
hsa-miR-3688-3p	-0.0955406	2.05184	0.0399362	0.100696
hsa-miR-196a-1-3p	-0.353155	-2.19739	0.0401183	0.100967
hsa-miR-1304-3p	-0.0780417	4.19984	0.0404622	0.101643
hsa-miR-1843	-0.0744014	2.7827	0.0406638	0.101961
hsa-miR-6746-3p	0.219404	-3.05567	0.0408851	0.102326
hsa-miR-511-5p	-0.329442	-3.83182	0.0410285	0.102495
hsa-miR-1225-3p	0.251508	-3.27444	0.04112	0.10252
hsa-let-7g-3p	-0.209371	-2.93789	0.0411897	0.10252
hsa-miR-671-5p	0.0848821	0.489075	0.0415441	0.103212
hsa-miR-1302	0.340364	-3.97797	0.041814	0.103693
hsa-miR-6837-3p	0.108013	-0.951487	0.0421955	0.104447
hsa-miR-23b-5p	-0.104718	-0.575854	0.0434532	0.107364
hsa-miR-1255b-2-3p	-0.193355	-2.05299	0.0440014	0.108521
hsa-miR-371b-3p	0.251546	-3.54488	0.0443364	0.109148
hsa-miR-6884-5p	0.118117	-0.688963	0.0460936	0.113268
hsa-miR-1275	0.0918351	1.56933	0.0472378	0.115686
hsa-miR-29a-5p	-0.203882	-3.10567	0.0472483	0.115686
hsa-miR-6875-3p	0.119522	-1.07554	0.0478841	0.117031
hsa-miR-296-5p	0.0968492	4.74363	0.0482589	0.117734
hsa-miR-548as-5p	-0.307573	-3.91847	0.0489101	0.119108
hsa-miR-6511a-5p	0.149395	-1.97419	0.0490809	0.11931
hsa-miR-501-3p	-0.0571503	7.49509	0.0492209	0.119436
hsa-miR-3682-5p	-0.296625	-3.8401	0.0494043	0.119666
hsa-miR-508-3p	-0.288815	-3.65999	0.050882	0.123025
hsa-miR-127-5p	-0.30581	-3.87816	0.0516765	0.124724
hsa-miR-3614-5p	0.140499	-1.29903	0.0530287	0.127759
hsa-miR-3117-3p	-0.202552	-2.58501	0.0553546	0.133126
hsa-miR-411-3p	-0.199375	-1.93852	0.0558767	0.134144
hsa-miR-1228-3p	0.12751	-0.297777	0.0562581	0.13482
hsa-miR-3157-3p	0.107392	0.194858	0.0570377	0.136447
hsa-miR-3150b-5p	0.162843	-2.53522	0.0575676	0.137472
hsa-miR-23a-5p	0.0787432	0.827908	0.0578659	0.137731
hsa-miR-3176	-0.164814	-1.94761	0.0578796	0.137731
hsa-miR-10399-3p	0.0785077	4.5898	0.0583556	0.13862
hsa-miR-4714-3p	-0.0933071	-0.358106	0.0602224	0.142804
hsa-miR-4787-5p	-0.183811	-2.39448	0.0608133	0.143786
hsa-miR-5094	-0.107427	-0.0886374	0.060849	0.143786
hsa-miR-6761-3p	-0.215538	-3.1287	0.0613073	0.144617
hsa-miR-1179	-0.136726	-0.958316	0.0617969	0.145518
hsa-miR-10399-5p	-0.151416	-0.602409	0.0635709	0.149436
hsa-miR-6767-3p	0.171408	-2.66466	0.0640406	0.150279
hsa-miR-3619-5p	-0.254259	-3.67261	0.0643369	0.150461
hsa-miR-598-5p	-0.347797	-4.09244	0.0643402	0.150461
hsa-miR-146b-3p	0.0808373	0.726088	0.0644878	0.150546
hsa-miR-4750-3p	0.264419	-3.82064	0.0646834	0.150742
hsa-miR-548ar-3p	-0.294708	-3.74447	0.0648444	0.150858
hsa-miR-494-3p	-0.1376	2.0916	0.0650166	0.150999
hsa-miR-361-5p	0.073712	7.22136	0.0653183	0.15144
hsa-miR-299-5p	-0.184807	-2.18878	0.0671664	0.155304
hsa-miR-3928-3p	0.0678564	1.02254	0.067284	0.155304
hsa-miR-877-5p	0.0846952	2.06313	0.0673291	0.155304
hsa-miR-3180	0.159679	-2.25374	0.0682642	0.157193
hsa-miR-3180-3p	0.159415	-2.25363	0.0686806	0.157884
hsa-miR-519d-3p	0.408007	-4.24122	0.0708552	0.162281
hsa-miR-1261	-0.136837	-1.63212	0.0709406	0.162281
hsa-miR-452-5p	-0.175425	-2.42389	0.0709531	0.162281
hsa-miR-18b-3p	0.0567359	4.31587	0.0719092	0.164191
hsa-miR-133a-3p	0.149088	1.79699	0.0725438	0.165061
hsa-miR-410-3p	-0.268737	-3.69965	0.0725738	0.165061
hsa-miR-942-5p	0.0562692	9.2097	0.0726562	0.165061
hsa-miR-6781-5p	0.219272	-3.43119	0.0733126	0.166274
hsa-miR-5187-5p	0.145975	-1.99437	0.0740319	0.167624
hsa-miR-6726-5p	0.297102	-3.98834	0.0744952	0.168392
hsa-miR-659-5p	0.127877	-1.71679	0.0748191	0.168695
hsa-miR-6508-3p	-0.155704	-2.52465	0.0749706	0.168695
hsa-miR-643	-0.165607	-1.61463	0.0750033	0.168695
hsa-miR-6877-5p	0.0848172	0.328081	0.0753491	0.169022
hsa-miR-6755-3p	-0.135864	-1.86441	0.0753981	0.169022
hsa-miR-580-5p	-0.342506	-4.18087	0.0757922	0.169624
hsa-miR-4639-3p	0.127416	-1.89127	0.0765227	0.170976
hsa-miR-5004-3p	0.205117	-3.35885	0.0770041	0.171769
hsa-miR-365b-3p	0.0607702	4.829	0.0780807	0.173482
hsa-miR-365a-3p	0.0607608	4.82895	0.078128	0.173482
hsa-miR-181c-3p	-0.114136	-1.00647	0.0781567	0.173482
hsa-miR-1304-5p	-0.0721583	0.717351	0.0784291	0.173802
hsa-miR-580-3p	-0.294547	-3.95258	0.0793008	0.175447
hsa-miR-6513-3p	0.0659911	4.16083	0.0797631	0.176182
hsa-miR-769-5p	-0.0718668	2.25398	0.0801326	0.176597
hsa-miR-5189-3p	0.176326	3.42836	0.0802122	0.176597
hsa-miR-6862-3p	0.160631	-2.75813	0.0818109	0.179825
hsa-miR-548w	-0.275482	-3.88158	0.0822094	0.180408
hsa-miR-6134	-0.15087	-3.03643	0.0828831	0.181326
hsa-miR-4510	-0.154356	-3.04115	0.0828957	0.181326
hsa-miR-378f	-0.124006	-2.28813	0.0834324	0.182059
hsa-miR-3179	0.072527	0.966174	0.0834996	0.182059
hsa-miR-7705	-0.282533	-3.94092	0.0844423	0.183818
hsa-miR-3160-5p	-0.215986	-3.47413	0.0848994	0.184517
hsa-miR-4779	0.16232	-2.71469	0.085178	0.184825
hsa-miR-129-1-3p	0.119518	-1.30047	0.0862489	0.18685
hsa-miR-6847-3p	0.161491	-2.77351	0.0867861	0.18741
hsa-miR-4738-3p	0.0671931	0.552083	0.0868938	0.18741
hsa-miR-92a-3p	0.0601535	17.3691	0.0869631	0.18741
hsa-miR-5001-3p	0.0776021	3.36985	0.0870613	0.18741
hsa-miR-6853-3p	0.113186	-1.69698	0.0873557	0.187745
hsa-miR-128-1-5p	-0.113987	-1.75882	0.0876668	0.188116
hsa-miR-6884-3p	-0.0970702	-0.860884	0.0882608	0.188972
hsa-miR-1323	0.417233	-4.05656	0.0883453	0.188972
hsa-miR-4317	-0.299715	-4.00994	0.0889331	0.189826
hsa-miR-5006-3p	0.0957723	0.99821	0.0890787	0.189826
hsa-miR-124-3p	-0.366146	-4.21922	0.0891647	0.189826
hsa-miR-10395-3p	0.221218	-3.21377	0.0906059	0.192591
hsa-miR-1307-3p	-0.0868929	6.00136	0.0910468	0.193225
hsa-miR-502-3p	-0.0585009	7.12837	0.0913883	0.193568
hsa-miR-409-5p	-0.149877	-1.68103	0.0915308	0.193568
hsa-miR-582-3p	-0.17658	-3.0172	0.091743	0.193568
hsa-miR-548ap-3p	-0.234869	-3.7083	0.0917805	0.193568
hsa-miR-6803-5p	-0.288888	-4.01443	0.0922142	0.19418
hsa-miR-134-5p	0.12708	0.686085	0.0930684	0.195675
hsa-miR-323a-5p	-0.312912	-3.97989	0.0942041	0.197464
hsa-miR-3144-5p	-0.243306	-3.62006	0.09429	0.197464
hsa-miR-6771-3p	0.185823	-3.09651	0.0943567	0.197464
hsa-miR-6739-3p	-0.105177	-1.26582	0.0948613	0.198213
hsa-miR-3939	0.112351	-1.71364	0.0953493	0.198841
hsa-miR-874-3p	-0.0812336	1.99261	0.0954555	0.198841
hsa-miR-4725-5p	0.320554	-4.1567	0.0956474	0.198935
hsa-miR-183-3p	-0.0790378	4.9226	0.0959744	0.199124
hsa-miR-3124-5p	0.124419	-1.59832	0.0960327	0.199124
hsa-miR-8072	0.291346	-3.98457	0.0963247	0.199425
hsa-miR-412-5p	-0.267891	-3.79695	0.0964815	0.199444
hsa-miR-3146	-0.148785	-2.67488	0.0971043	0.200426
hsa-miR-8485	-0.127966	-1.25241	0.0976535	0.201252
hsa-miR-5690	0.0920425	0.560647	0.0990979	0.203793
hsa-miR-487b-5p	0.191764	-2.93181	0.0991875	0.203793
hsa-miR-10396b-3p	-0.315889	-4.14732	0.100608	0.206262
hsa-miR-339-5p	0.076383	6.52132	0.100694	0.206262
hsa-miR-4724-5p	0.288862	-4.08287	0.101134	0.206852
hsa-miR-509-3p	-0.207944	-3.33124	0.103515	0.211402
hsa-miR-30a-5p	-0.0860444	4.78786	0.104878	0.213862
hsa-miR-6849-3p	0.0821267	0.094159	0.105638	0.215089
hsa-miR-5010-5p	0.0999058	1.92493	0.106448	0.216412
hsa-miR-7846-3p	-0.30321	-4.09145	0.106747	0.216694
hsa-miR-3614-3p	-0.328547	-4.21026	0.108255	0.219426
hsa-miR-6875-5p	0.12873	-2.26567	0.109034	0.220675
hsa-miR-375-3p	-0.11162	-0.30131	0.111575	0.225482
hsa-miR-1972	-0.257721	-3.68676	0.11201	0.226024
hsa-miR-4747-5p	0.150321	-2.57602	0.113366	0.228418
hsa-miR-127-3p	-0.128482	0.670206	0.115014	0.231395
hsa-miR-4690-3p	-0.122495	-1.85512	0.115411	0.231849
hsa-miR-4787-3p	0.155729	-2.81638	0.115593	0.231871
hsa-miR-1246	-0.212578	-2.15592	0.115812	0.231967
hsa-miR-5089-3p	-0.273471	-3.98418	0.116397	0.232285
hsa-miR-4742-5p	-0.108757	-1.11574	0.116451	0.232285
hsa-miR-7109-3p	0.0759522	-0.257392	0.116486	0.232285
hsa-miR-188-3p	-0.224209	-3.75965	0.117928	0.234713
hsa-miR-491-3p	-0.135098	-2.28545	0.11805	0.234713
hsa-miR-607	-0.204838	-3.53422	0.120293	0.238823
hsa-miR-193b-3p	0.0911642	-0.337526	0.121485	0.24033
hsa-miR-664b-5p	0.0930605	-0.948537	0.121531	0.24033
hsa-miR-551a	0.137121	-2.42597	0.121585	0.24033
hsa-miR-335-5p	-0.104116	2.5741	0.122147	0.241089
hsa-miR-331-3p	0.0543768	6.25112	0.122566	0.241155
hsa-miR-3936	0.177782	-3.28895	0.122817	0.241155
hsa-miR-1273h-5p	0.0956453	-1.23901	0.122839	0.241155
hsa-miR-618	0.0886487	2.16078	0.122893	0.241155
hsa-miR-6503-5p	0.0965234	-1.3409	0.123485	0.241744
hsa-miR-6840-5p	0.139611	-0.805831	0.12355	0.241744
hsa-miR-556-3p	-0.185463	-3.13318	0.125124	0.24447
hsa-miR-485-5p	0.126067	-0.542735	0.126008	0.245811
hsa-miR-937-5p	-0.301201	-4.17819	0.12631	0.245811
hsa-miR-7850-5p	-0.246857	-3.87925	0.126355	0.245811
hsa-miR-506-3p	-0.256658	-4.00439	0.128439	0.249508
hsa-miR-513c-5p	-0.235624	-3.78128	0.129054	0.250342
hsa-miR-7113-5p	0.0831523	-0.718399	0.129538	0.250922
hsa-miR-664a-3p	0.0430453	6.30171	0.130561	0.252542
hsa-miR-7114-3p	0.177768	-3.32782	0.131267	0.253546
hsa-miR-4508	-0.129571	6.5356	0.135342	0.260927
hsa-miR-369-5p	-0.201117	-3.49857	0.135474	0.260927
hsa-miR-4757-3p	-0.15455	-3.03308	0.13609	0.261741
hsa-miR-1268a	-0.184206	-1.65662	0.13924	0.267081
hsa-miR-7854-3p	0.0881213	-1.10268	0.139261	0.267081
hsa-miR-505-3p	0.0409185	6.76834	0.14038	0.268847
hsa-miR-3683	-0.293557	-4.20412	0.141198	0.270031
hsa-miR-6780a-3p	-0.0729373	-0.362081	0.142634	0.272392
hsa-miR-1292-3p	0.0798527	-0.523044	0.143245	0.273174
hsa-miR-125b-2-3p	-0.178931	-3.41903	0.14401	0.27414
hsa-miR-494-5p	0.223702	-3.78034	0.14432	0.27414
hsa-miR-491-5p	0.0720337	0.706912	0.144359	0.27414
hsa-miR-3187-3p	0.058055	1.98152	0.145256	0.275458
hsa-miR-6837-5p	0.0886509	-1.11839	0.145739	0.275987
hsa-miR-4653-3p	-0.227889	-3.66486	0.146132	0.276345
hsa-miR-16-1-3p	-0.21591	-3.71649	0.146389	0.276445
hsa-miR-5695	-0.083768	1.72633	0.148725	0.280465
hsa-miR-3165	-0.124486	-2.50672	0.14932	0.280576
hsa-miR-4659b-5p	-0.097916	-0.433102	0.149368	0.280576
hsa-miR-2276-5p	0.219238	-3.83395	0.14977	0.280576
hsa-miR-6851-3p	0.0873271	-1.146	0.14982	0.280576
hsa-miR-3158-5p	0.0621123	0.5904	0.14982	0.280576
hsa-miR-3611	-0.30295	-4.2455	0.150082	0.280679
hsa-miR-200c-3p	-0.0582611	3.06759	0.151188	0.282079
hsa-miR-4638-5p	0.170143	-3.43729	0.151248	0.282079
hsa-miR-935	-0.130661	-2.03089	0.152294	0.28364
hsa-miR-3679-5p	0.135103	-2.58239	0.153117	0.28478
hsa-miR-6514-5p	0.0541882	0.295119	0.154221	0.28644
hsa-miR-589-3p	0.057334	1.75091	0.154611	0.286512
hsa-miR-7843-3p	0.173945	-3.41167	0.154945	0.286512
hsa-miR-873-5p	-0.21918	-3.73549	0.155078	0.286512
hsa-miR-4446-3p	0.0916468	-0.519596	0.155106	0.286512
hsa-miR-6889-3p	0.0757089	-0.746989	0.155544	0.28693
hsa-miR-4484	-0.196193	-3.62713	0.155797	0.287004
hsa-miR-616-5p	-0.053208	2.87943	0.156008	0.287004
hsa-miR-6516-3p	-0.266442	-4.10952	0.15637	0.287279
hsa-miR-10392-5p	0.204566	-3.6736	0.156796	0.287671
hsa-miR-144-3p	-0.833424	1.16415	0.157231	0.28808
hsa-miR-497-5p	-0.220713	-3.82996	0.159326	0.291523
hsa-miR-6790-3p	-0.106169	-2.15609	0.160864	0.29394
hsa-miR-422a	-0.09417	-2.26376	0.161126	0.294023
hsa-miR-6716-3p	0.147688	-2.99922	0.161756	0.294774
hsa-miR-125a-3p	0.108918	-2.07516	0.164095	0.298636
hsa-miR-29b-1-5p	-0.101791	-1.05651	0.164751	0.299427
hsa-miR-6770-5p	-0.156041	-3.27083	0.167467	0.303956
hsa-miR-4433b-3p	-0.145412	-2.2765	0.168292	0.305044
hsa-miR-6780b-3p	0.0631004	-0.126858	0.168932	0.305793
hsa-miR-370-3p	-0.116625	-0.94566	0.169341	0.306124
hsa-miR-9985	-0.197723	-3.69736	0.169606	0.306196
hsa-miR-4473	0.0683932	1.38116	0.169912	0.30634
hsa-miR-3184-3p	0.229994	-3.98095	0.170768	0.307111
hsa-miR-182-3p	-0.155807	-3.00905	0.170794	0.307111
hsa-miR-1273c	0.0614029	-0.050157	0.171283	0.307583
hsa-miR-330-3p	0.0365492	2.8926	0.171639	0.307692
hsa-miR-140-3p	-0.0464447	11.36	0.171799	0.307692
hsa-miR-181a-5p	-0.066029	9.67332	0.172089	0.307806
hsa-miR-6829-3p	0.214196	-3.87476	0.173274	0.309515
hsa-miR-4665-5p	0.0982882	-1.85753	0.174544	0.310771
hsa-miR-1537-3p	-0.242663	-4.09804	0.174634	0.310771
hsa-miR-6893-3p	0.101015	-1.78009	0.174665	0.310771
hsa-miR-5010-3p	0.0386697	6.35751	0.175127	0.311184
hsa-miR-3161	0.210284	-3.50216	0.177552	0.31482
hsa-miR-500a-5p	-0.0406333	5.34391	0.177639	0.31482
hsa-miR-181b-2-3p	-0.143402	-2.99385	0.178688	0.316265
hsa-miR-550b-2-5p	0.0613683	-0.210827	0.179289	0.316915
hsa-miR-26a-1-3p	0.112188	-1.53209	0.180168	0.318054
hsa-miR-4722-5p	0.169296	-3.46992	0.180679	0.318458
hsa-miR-6793-5p	0.142924	-3.05927	0.180867	0.318458
hsa-miR-224-3p	-0.247326	-4.05278	0.181553	0.319251
hsa-miR-5003-3p	0.0905744	-1.17031	0.182613	0.320556
hsa-miR-10527-5p	0.0445408	3.08714	0.182769	0.320556
hsa-miR-6730-3p	0.0684761	-0.0881248	0.18442	0.322814
hsa-miR-4289	-0.155233	-3.79811	0.184734	0.322814
hsa-miR-3182	-0.177016	-3.7915	0.184772	0.322814
hsa-miR-9901	-0.191194	-3.68698	0.186166	0.324831
hsa-miR-3675-5p	-0.158217	-2.79222	0.186596	0.325163
hsa-miR-7851-3p	-0.140294	-2.71921	0.187716	0.326693
hsa-miR-548b-3p	-0.217272	-3.83609	0.188375	0.327419
hsa-miR-500b-5p	-0.0398408	5.24287	0.190413	0.330537
hsa-miR-6807-3p	0.100964	-2.06522	0.190724	0.330654
hsa-miR-4727-5p	0.220113	-4.03507	0.192251	0.332874
hsa-miR-1913	-0.165245	-3.39356	0.192797	0.333393
hsa-miR-6742-3p	-0.207566	-3.93408	0.19335	0.333924
hsa-miR-214-3p	0.137517	-0.937169	0.194722	0.335865
hsa-miR-6809-5p	-0.150184	-3.08207	0.19549	0.336761
hsa-miR-513a-5p	-0.259719	-4.13956	0.198081	0.34079
hsa-let-7i-3p	-0.0609113	0.974558	0.198556	0.341173
hsa-miR-190b-5p	-0.0946174	-0.11313	0.199717	0.342734
hsa-miR-6891-3p	-0.272214	-4.20898	0.200601	0.343066
hsa-miR-4795-3p	-0.225777	-4.01603	0.200672	0.343066
hsa-miR-1276	0.114038	-2.51695	0.201075	0.343066
hsa-miR-6763-5p	0.210947	-3.97762	0.201165	0.343066
hsa-miR-12136	-0.071029	-0.260155	0.201178	0.343066
hsa-miR-493-3p	-0.119326	-1.56998	0.202113	0.344227
hsa-miR-629-5p	-0.0493349	7.29014	0.202636	0.344684
hsa-miR-543	0.0868825	2.91094	0.203315	0.345406
hsa-miR-3200-5p	0.0488042	5.80373	0.205233	0.347873
hsa-miR-1234-3p	0.0547165	1.36112	0.205281	0.347873
hsa-miR-548c-3p	-0.118847	-2.7052	0.205679	0.348112
hsa-miR-7975	-0.213123	-4.05349	0.20888	0.35267
hsa-miR-4734	0.155784	-3.35842	0.208893	0.35267
hsa-miR-377-5p	0.124934	-2.5284	0.209186	0.352725
hsa-miR-1914-5p	-0.0867647	-1.3746	0.210205	0.35374
hsa-miR-3177-3p	0.0518919	1.48832	0.210311	0.35374
hsa-miR-92b-3p	0.0439322	9.97924	0.21189	0.355954
hsa-miR-943	0.0679428	-1.01207	0.212399	0.356368
hsa-miR-219b-3p	-0.274791	-4.29217	0.213241	0.357338
hsa-miR-6818-5p	-0.0844096	-1.63399	0.214195	0.358492
hsa-miR-1285-3p	-0.033179	4.82443	0.214742	0.358965
hsa-miR-744-3p	-0.0631925	0.517317	0.216267	0.361067
hsa-miR-6739-5p	-0.126783	-3.02262	0.217875	0.363304
hsa-miR-6751-5p	-0.168708	-3.54713	0.21833	0.363614
hsa-miR-654-5p	0.101302	-1.28297	0.22047	0.366728
hsa-miR-4688	0.140532	-3.37444	0.22171	0.368006
hsa-miR-2277-5p	-0.103547	-2.50961	0.221782	0.368006
hsa-miR-10a-3p	-0.154109	-3.48357	0.223749	0.370815
hsa-miR-6845-5p	-0.221451	-4.08504	0.225083	0.372571
hsa-miR-4482-3p	0.176125	0.540798	0.225376	0.3726
hsa-miR-6869-5p	0.182387	-3.76174	0.226614	0.37419
hsa-miR-4435	0.0602595	0.208232	0.227606	0.37516
hsa-miR-6730-5p	0.147272	-3.15247	0.227756	0.37516
hsa-miR-11401	-0.140104	2.10741	0.229325	0.377286
hsa-miR-329-3p	-0.0898199	2.74661	0.22979	0.377591
hsa-miR-4796-5p	-0.133893	-3.20076	0.231187	0.378973
hsa-miR-548s	-0.144242	-3.39362	0.231338	0.378973
hsa-miR-4482-5p	-0.16457	-2.96671	0.23147	0.378973
hsa-miR-6741-5p	0.12947	-2.99881	0.235494	0.385096
hsa-miR-16-2-3p	-0.0847708	10.1645	0.238125	0.388928
hsa-miR-4655-5p	0.0975466	-2.16954	0.238666	0.389331
hsa-miR-5001-5p	-0.170192	-3.6887	0.238947	0.389331
hsa-miR-345-5p	-0.0467772	4.42348	0.23974	0.390154
hsa-miR-3195	-0.0997905	-2.17305	0.242342	0.393915
hsa-miR-5583-3p	-0.148198	-3.44406	0.245024	0.397797
hsa-miR-7151-5p	0.227126	-4.15706	0.246156	0.399156
hsa-miR-548q	-0.0590679	1.05661	0.24702	0.400078
hsa-miR-136-3p	-0.160026	-3.67943	0.248552	0.401738
hsa-miR-3175	0.151803	-3.49824	0.248638	0.401738
hsa-miR-762	-0.252718	-4.27502	0.251563	0.405979
hsa-miR-4796-3p	-0.175979	-3.88471	0.25213	0.406344
hsa-miR-363-5p	0.0498524	0.190989	0.252652	0.406344
hsa-miR-4785	-0.0818507	-1.44856	0.252689	0.406344
hsa-miR-3922-3p	0.147977	-3.56798	0.255436	0.410274
hsa-miR-668-3p	0.110454	-2.14987	0.256522	0.41153
hsa-miR-6772-3p	0.103687	-2.5709	0.259554	0.415878
hsa-miR-2277-3p	0.0593824	-0.443364	0.259847	0.415878
hsa-miR-5584-3p	-0.175501	-3.79223	0.260899	0.416241
hsa-miR-339-3p	0.0475276	5.21179	0.261406	0.416241
hsa-miR-6781-3p	-0.129175	-3.25173	0.261462	0.416241
hsa-miR-212-3p	-0.106635	-2.71099	0.261575	0.416241
hsa-miR-152-5p	0.218862	-4.21257	0.261611	0.416241
hsa-miR-1228-5p	0.165339	-3.59638	0.262362	0.416467
hsa-miR-3130-5p	0.0637048	2.23178	0.262564	0.416467
hsa-miR-211-5p	-0.0536582	0.177276	0.262906	0.416467
hsa-miR-219b-5p	0.0568774	-0.202985	0.262983	0.416467
hsa-miR-1185-1-3p	-0.164108	-3.71317	0.26368	0.417082
hsa-miR-4524a-3p	-0.185417	-3.85301	0.264257	0.417508
hsa-miR-4800-3p	-0.14831	-3.66054	0.264723	0.417756
hsa-miR-154-5p	0.105	-1.69923	0.265711	0.418459
hsa-miR-376b-3p	-0.237517	-4.27465	0.266078	0.418459
hsa-miR-4757-5p	0.200957	-4.11691	0.266096	0.418459
hsa-miR-6895-3p	0.0998019	-2.40331	0.267205	0.419717
hsa-miR-6813-5p	0.105299	-2.76854	0.26891	0.421905
hsa-miR-6776-3p	0.132888	-3.29794	0.26945	0.422264
hsa-miR-4444	-0.160763	-3.79598	0.270332	0.422645
hsa-miR-3920	-0.20545	-4.11053	0.270752	0.422645
hsa-miR-3605-5p	0.0577291	0.18628	0.270833	0.422645
hsa-miR-1909-3p	-0.199261	-4.01799	0.271247	0.422645
hsa-miR-4676-3p	0.0611195	-0.714476	0.271255	0.422645
hsa-miR-3065-5p	-0.120665	-3.2127	0.271905	0.423172
hsa-miR-4466	0.140485	-3.31853	0.272791	0.424055
hsa-miR-6867-3p	0.197862	-4.05745	0.273099	0.424055
hsa-miR-192-3p	-0.0766362	-0.570886	0.274571	0.425852
hsa-miR-496	-0.12351	-2.65237	0.275954	0.427507
hsa-miR-758-3p	-0.111071	-2.51965	0.277601	0.429192
hsa-miR-6131	-0.0781167	-1.74748	0.277675	0.429192
hsa-miR-1249-3p	0.0571886	5.18348	0.278725	0.430323
hsa-miR-4723-5p	0.0601883	-1.00477	0.280613	0.432326
hsa-miR-5192	0.188871	-3.99894	0.280661	0.432326
hsa-miR-625-3p	-0.0474266	5.86237	0.282855	0.434721
hsa-miR-6731-3p	0.0954537	-2.41886	0.282858	0.434721
hsa-miR-433-3p	0.0825166	1.2741	0.285286	0.437957
hsa-miR-5196-3p	0.0952812	-2.29349	0.285776	0.438211
hsa-miR-96-3p	-0.207969	-4.05286	0.288367	0.441684
hsa-miR-181a-2-3p	0.0314218	6.77238	0.289279	0.442581
hsa-miR-378g	0.0809519	-2.49618	0.291405	0.445331
hsa-miR-6852-5p	0.0403239	0.393162	0.292111	0.445906
hsa-miR-6826-5p	-0.116524	-2.56432	0.293798	0.447669
hsa-miR-128-3p	0.0391194	9.83439	0.293928	0.447669
hsa-miR-4726-5p	0.198744	-4.14319	0.295539	0.449617
hsa-miR-3617-3p	0.105975	-2.72232	0.296147	0.450037
hsa-miR-376a-5p	-0.177252	-3.90943	0.298062	0.452169
hsa-miR-627-3p	-0.0508183	2.59002	0.298217	0.452169
hsa-miR-3688-5p	-0.158002	-4.07078	0.298923	0.452288
hsa-miR-6751-3p	0.118013	-3.30397	0.299155	0.452288
hsa-miR-4670-3p	-0.0975181	-2.74669	0.299298	0.452288
hsa-miR-5004-5p	0.145612	-3.69166	0.300303	0.4533
hsa-miR-1229-5p	-0.181032	-3.92139	0.301204	0.453966
hsa-miR-6802-5p	0.180584	-4.01635	0.301415	0.453966
hsa-miR-4712-5p	0.146487	-3.77184	0.302505	0.455101
hsa-miR-6735-5p	0.0396463	1.59137	0.303855	0.456626
hsa-miR-103a-1-5p	-0.0679862	-0.776537	0.305619	0.458768
hsa-miR-4492	-0.0827141	-1.52393	0.306895	0.460173
hsa-miR-6861-5p	0.140794	-3.56718	0.310554	0.465145
hsa-miR-125b-5p	0.0792921	7.66173	0.31417	0.47004
hsa-miR-155-5p	-0.0411782	4.38908	0.314917	0.470638
hsa-miR-4639-5p	-0.200095	-4.16284	0.316613	0.472651
hsa-miR-605-5p	0.084012	-1.75037	0.317435	0.473356
hsa-miR-92a-2-5p	0.0908942	-2.5655	0.32	0.476655
hsa-miR-4507	-0.117773	-2.67928	0.322366	0.479652
hsa-miR-204-5p	-0.0851126	0.346873	0.326174	0.484786
hsa-miR-6753-3p	0.0999595	-2.96264	0.32862	0.487886
hsa-miR-6779-5p	-0.175777	-4.03458	0.333292	0.49428
hsa-miR-191-5p	0.0250589	15.3117	0.333948	0.494488
hsa-let-7f-2-3p	-0.0971789	-2.39941	0.334163	0.494488
hsa-miR-4708-3p	0.150149	-3.84245	0.334923	0.495072
hsa-miR-4498	0.112568	-3.25851	0.337244	0.49796
hsa-miR-6858-3p	0.0917396	-2.38771	0.338766	0.499662
hsa-miR-7977	0.0275361	3.77755	0.341264	0.502498
hsa-miR-3617-5p	0.133151	-3.65635	0.341431	0.502498
hsa-miR-6874-5p	-0.190051	-4.1369	0.341837	0.502549
hsa-miR-3194-3p	-0.113429	-3.35211	0.342782	0.50269
hsa-miR-3149	-0.186807	-4.07017	0.342963	0.50269
hsa-miR-4753-3p	-0.0416209	1.0909	0.343047	0.50269
hsa-miR-6735-3p	0.0600702	-1.40441	0.344549	0.504345
hsa-miR-6882-5p	0.0547018	-1.04709	0.34527	0.504855
hsa-miR-1236-5p	0.127088	-3.55313	0.348134	0.508494
hsa-miR-3940-3p	0.0439482	7.18196	0.352851	0.514828
hsa-miR-3960	-0.0599565	4.71014	0.353348	0.514999
hsa-miR-6797-3p	0.0493785	-0.566067	0.357105	0.519915
hsa-miR-3162-3p	0.0619108	-1.20343	0.358544	0.521448
hsa-let-7b-3p	0.0292805	6.20324	0.360568	0.523513
hsa-miR-891a-5p	0.122286	-3.40766	0.361193	0.523513
hsa-miR-1236-3p	0.0404361	0.105467	0.36127	0.523513
hsa-miR-129-5p	0.0697747	-1.65038	0.36151	0.523513
hsa-miR-6738-5p	-0.18372	-4.16084	0.363508	0.525844
hsa-miR-3909	0.0521633	2.51367	0.363912	0.525866
hsa-miR-758-5p	-0.154238	-3.94131	0.364407	0.526021
hsa-miR-4742-3p	0.0417092	5.47244	0.367583	0.530041
hsa-miR-3129-3p	0.0797732	-2.39746	0.370397	0.533529
hsa-miR-449c-5p	-0.182043	-4.11656	0.371398	0.534403
hsa-miR-6736-3p	0.0887729	-2.96402	0.372079	0.534594
hsa-miR-7849-3p	-0.143082	-3.87855	0.372321	0.534594
hsa-miR-6783-5p	0.0438384	-0.0554135	0.372742	0.534632
hsa-miR-6769a-3p	-0.125826	-3.65654	0.37354	0.53521
hsa-miR-1299	-0.153755	1.98143	0.374091	0.535432
hsa-miR-4754	0.0716073	-2.16004	0.37747	0.539699
hsa-miR-1287-3p	-0.107885	-3.41809	0.378625	0.540779
hsa-miR-6740-3p	0.0817866	-2.84117	0.379937	0.542081
hsa-miR-346	0.101915	-2.06994	0.380618	0.542378
hsa-miR-222-3p	-0.0345749	5.9013	0.380946	0.542378
hsa-miR-34c-3p	0.164198	-4.17359	0.381647	0.542615
hsa-miR-590-3p	-0.733407	-3.45487	0.381914	0.542615
hsa-miR-6774-3p	0.073824	-2.36084	0.382563	0.542967
hsa-miR-5187-3p	-0.074464	-2.5392	0.383229	0.543343
hsa-miR-10b-5p	-0.056837	1.28242	0.386254	0.546174
hsa-miR-5587-3p	-0.106059	-3.38492	0.386257	0.546174
hsa-miR-1185-2-3p	-0.156556	-4.08562	0.386436	0.546174
hsa-miR-6824-3p	0.110565	-3.40989	0.387523	0.547139
hsa-miR-6753-5p	0.157703	-3.91798	0.39002	0.55009
hsa-miR-3133	-0.0426498	0.917458	0.392126	0.552015
hsa-miR-320a-5p	0.0598371	-1.62959	0.3922	0.552015
hsa-miR-147b-3p	-0.154092	-4.08916	0.393504	0.552676
hsa-miR-4467	0.115372	-2.66581	0.393698	0.552676
hsa-miR-3137	-0.123622	-3.75964	0.393894	0.552676
hsa-miR-605-3p	-0.14834	-4.02859	0.394398	0.55281
hsa-miR-6826-3p	0.097481	0.540795	0.395012	0.553099
hsa-miR-151a-5p	0.0253246	10.5159	0.39857	0.556945
hsa-miR-4804-5p	-0.0543274	-0.173384	0.398754	0.556945
hsa-miR-6878-3p	0.10868	-3.60617	0.398993	0.556945
hsa-miR-7108-3p	0.0691565	-2.27025	0.400765	0.558842
hsa-miR-939-3p	-0.128715	-3.7553	0.401415	0.559173
hsa-miR-3682-3p	-0.0733538	-1.97549	0.402767	0.559981
hsa-miR-10398-5p	-0.0884499	-3.01131	0.402822	0.559981
hsa-miR-1287-5p	-0.0580749	1.32104	0.403678	0.560441
hsa-miR-187-3p	-0.1739	-4.14904	0.403981	0.560441
hsa-miR-150-3p	0.0307364	1.62585	0.404429	0.560488
hsa-miR-769-3p	0.048372	-0.816751	0.406376	0.56261
hsa-miR-338-3p	-0.0825341	-2.765	0.410814	0.568174
hsa-miR-7-2-3p	-0.10194	-3.49096	0.412728	0.570239
hsa-miR-1910-5p	0.083746	-2.94545	0.413564	0.570812
hsa-miR-181b-5p	0.0276168	5.20082	0.415415	0.572783
hsa-miR-4446-5p	0.135356	-3.944	0.418053	0.575833
hsa-miR-425-5p	0.0233801	11.4287	0.420531	0.578657
hsa-miR-4449	-0.0794939	-2.79218	0.422311	0.580517
hsa-miR-4701-5p	0.080028	-2.80336	0.423779	0.581945
hsa-miR-544b	-0.146572	-3.92066	0.424515	0.582364
hsa-miR-6815-5p	-0.0456951	-0.379609	0.426708	0.58478
hsa-miR-550a-3p	0.0322604	6.96759	0.427702	0.58555
hsa-miR-3160-3p	0.0879208	-3.35549	0.429906	0.587716
hsa-miR-3124-3p	-0.0998981	-3.51941	0.430481	0.587716
hsa-miR-519a-5p	0.189529	-4.16824	0.430587	0.587716
hsa-miR-4323	-0.0733664	-2.60253	0.432486	0.589656
hsa-miR-4766-3p	-0.115488	-3.86874	0.432879	0.589656
hsa-miR-4647	0.0895153	-3.16704	0.433517	0.589932
hsa-miR-3168	-0.0468015	-1.63315	0.436394	0.593251
hsa-miR-6874-3p	0.0958357	-3.45656	0.438267	0.595199
hsa-miR-4797-5p	-0.125546	-3.9309	0.440237	0.597256
hsa-miR-505-5p	0.0250515	3.25402	0.440802	0.597256
hsa-miR-1270	0.0394243	3.32138	0.441604	0.597256
hsa-miR-5090	-0.0428227	-0.12459	0.441927	0.597256
hsa-miR-3198	0.0708861	-2.67319	0.441987	0.597256
hsa-miR-1284	-0.0335293	2.53433	0.444233	0.599166
hsa-miR-134-3p	0.136845	-4.08669	0.444534	0.599166
hsa-miR-4635	0.0417665	-0.244848	0.444728	0.599166
hsa-miR-3667-3p	0.0693915	-0.209351	0.448153	0.60318
hsa-miR-202-3p	0.063953	-1.54775	0.449329	0.604162
hsa-miR-1180-5p	0.089393	-3.32073	0.452356	0.60763
hsa-miR-4727-3p	-0.0727721	-2.54165	0.453299	0.607695
hsa-miR-5698	0.1359	-2.94609	0.453302	0.607695
hsa-miR-1909-5p	-0.0928256	-3.43836	0.453899	0.607837
hsa-miR-6852-3p	0.0451243	-0.827923	0.454394	0.607837
hsa-miR-1296-5p	0.0432724	0.483812	0.454803	0.607837
hsa-miR-3188	-0.0718227	-1.94803	0.455554	0.607837
hsa-miR-29c-5p	0.0285833	5.429	0.455653	0.607837
hsa-miR-33b-3p	0.0618689	-2.34349	0.458297	0.610762
hsa-miR-6785-5p	0.151343	-4.20655	0.458903	0.610968
hsa-miR-129-2-3p	-0.0510081	-1.59479	0.459937	0.611743
hsa-miR-3692-3p	-0.0628806	-2.54851	0.461122	0.612717
hsa-miR-449b-3p	-0.123502	-3.91264	0.463984	0.615916
hsa-miR-93-3p	0.0209892	7.91316	0.465045	0.616719
hsa-miR-6770-3p	-0.102472	-3.78577	0.466052	0.61745
hsa-miR-4423-5p	0.10175	-3.55242	0.469012	0.620509
hsa-miR-6810-5p	0.0934263	-3.37439	0.469277	0.620509
hsa-miR-4668-3p	-0.0838195	-3.40337	0.471332	0.622618
hsa-miR-329-5p	-0.132772	-4.06395	0.472424	0.623452
hsa-miR-4479	-0.056194	-2.13645	0.472896	0.623468
hsa-miR-574-5p	0.0472009	3.51391	0.476466	0.627563
hsa-miR-6733-5p	0.0672724	-2.90346	0.477544	0.628372
hsa-miR-4762-5p	-0.0385855	-0.309268	0.478234	0.628668
hsa-miR-6812-5p	0.120897	-4.05201	0.482358	0.633475
hsa-miR-4766-5p	-0.0999149	-3.70247	0.48327	0.634058
hsa-miR-4662a-5p	-0.0688154	-2.09136	0.483896	0.634264
hsa-miR-4436a	0.123158	-4.03343	0.484384	0.634291
hsa-miR-550a-5p	0.0196895	5.42109	0.485297	0.634591
hsa-miR-760	-0.0634349	-2.31887	0.485551	0.634591
hsa-miR-4781-5p	0.0488573	-1.86129	0.48675	0.634949
hsa-miR-4750-5p	0.0924678	-3.53796	0.486763	0.634949
hsa-miR-3190-3p	0.0527642	-2.19169	0.487408	0.635055
hsa-miR-30b-3p	-0.056139	-1.3132	0.487782	0.635055
hsa-miR-6807-5p	0.0626823	-2.64556	0.488602	0.635511
hsa-miR-1292-5p	0.0269155	4.53567	0.489459	0.636014
hsa-miR-4751	0.125876	-4.02171	0.490055	0.636095
hsa-miR-6798-5p	0.145357	-4.20581	0.49046	0.636095
hsa-miR-5684	-0.0520907	-2.23183	0.49155	0.636898
hsa-miR-205-5p	-0.121802	-1.38505	0.492244	0.637188
hsa-miR-7155-5p	0.079246	-3.30222	0.494375	0.639335
hsa-miR-550a-3-5p	-0.019857	4.5806	0.495442	0.640103
hsa-miR-99b-3p	-0.0561477	-1.7785	0.49619	0.640459
hsa-miR-6734-5p	0.0424649	1.51449	0.497202	0.641153
hsa-miR-25-5p	0.0276251	3.07009	0.499648	0.643258
hsa-miR-222-5p	0.118278	-4.11327	0.500048	0.643258
hsa-miR-4676-5p	0.0328128	-0.646723	0.500259	0.643258
hsa-miR-4659a-3p	0.0345885	4.97111	0.50325	0.646409
hsa-miR-4326	0.0713395	5.29274	0.503665	0.646409
hsa-miR-4741	0.0940522	-3.66267	0.505559	0.647728
hsa-miR-6784-3p	0.0906588	-3.65932	0.505868	0.647728
hsa-miR-6755-5p	0.0668089	-2.96111	0.506127	0.647728
hsa-miR-6089	-0.107322	-3.89686	0.507289	0.648602
hsa-miR-6881-5p	-0.117378	-3.95748	0.508695	0.649651
hsa-miR-1290	-0.123447	-3.95232	0.509069	0.649651
hsa-miR-744-5p	0.0252147	5.26698	0.511295	0.651877
hsa-miR-6877-3p	0.0686275	-3.05987	0.512991	0.653425
hsa-miR-1281	0.136557	-4.20798	0.51725	0.65823
hsa-miR-550b-3p	-0.0325677	1.3647	0.517774	0.658278
hsa-miR-6831-3p	-0.123524	-4.16512	0.518603	0.658713
hsa-miR-193a-3p	-0.058135	-2.27574	0.520275	0.660218
hsa-miR-3191-3p	0.0726438	-3.17151	0.521908	0.66167
hsa-miR-6729-5p	-0.0740714	-3.18741	0.524482	0.662848
hsa-miR-4437	-0.0950232	-3.72827	0.524495	0.662848
hsa-miR-30c-1-3p	-0.0270911	0.936971	0.525069	0.662848
hsa-miR-3144-3p	0.105588	-3.89217	0.525235	0.662848
hsa-miR-4539	-0.0976546	-3.70616	0.525285	0.662848
hsa-miR-95-3p	-0.0670743	-2.80599	0.52599	0.66312
hsa-miR-3609	0.0729404	-3.11949	0.529423	0.666827
hsa-miR-4763-5p	0.0398539	-0.953347	0.530281	0.667286
hsa-miR-5581-3p	-0.0224637	2.00518	0.531833	0.668618
hsa-miR-500b-3p	0.0427915	-1.68481	0.532763	0.669166
hsa-miR-218-5p	0.114492	-0.499069	0.535207	0.671613
hsa-miR-548ap-5p	-0.104776	-3.95243	0.535759	0.671683
hsa-miR-3139	-0.0916266	-3.85989	0.538615	0.674073
hsa-miR-2355-3p	-0.0420817	-1.03689	0.53889	0.674073
hsa-miR-5000-3p	0.0950142	-3.94608	0.539159	0.674073
hsa-miR-6848-5p	0.0692762	-3.14397	0.545396	0.681241
hsa-miR-7107-3p	0.107544	-4.00703	0.546741	0.681752
hsa-miR-6769b-3p	0.0335213	-0.77872	0.546816	0.681752
hsa-miR-4758-3p	-0.0486744	-1.32702	0.547315	0.681752
hsa-miR-181d-5p	-0.0389816	-0.865074	0.549618	0.683757
hsa-miR-4745-5p	-0.0621188	-2.7241	0.549934	0.683757
hsa-miR-3174	-0.0620696	-3.17742	0.551801	0.684931
hsa-miR-382-5p	0.0485818	0.866622	0.552009	0.684931
hsa-miR-542-5p	0.03037	-0.320812	0.552397	0.684931
hsa-miR-6509-3p	0.0213311	1.88703	0.554928	0.687441
hsa-miR-6834-3p	-0.0644428	-3.22788	0.559309	0.691853
hsa-miR-4661-5p	0.032432	0.0337876	0.559512	0.691853
hsa-miR-548t-5p	-0.0720687	-3.41653	0.562336	0.694711
hsa-miR-6816-3p	0.0359332	-0.923238	0.566237	0.698893
hsa-miR-6894-5p	0.0725107	-3.40092	0.567529	0.699849
hsa-miR-27a-5p	0.0480802	-2.26724	0.571061	0.703093
hsa-miR-610	-0.0268864	0.567035	0.571198	0.703093
hsa-miR-933	0.0490963	-2.51766	0.574308	0.706279
hsa-miR-378e	-0.0872457	-4.1073	0.575931	0.707524
hsa-miR-766-5p	0.0575676	-2.88752	0.576366	0.707524
hsa-miR-184	-0.0401551	-1.36158	0.577352	0.708092
hsa-miR-4664-5p	0.0650414	-3.38272	0.57887	0.709313
hsa-miR-24-1-5p	-0.0627094	-3.23936	0.581578	0.711337
hsa-miR-199a-5p	0.0283934	3.33552	0.582069	0.711337
hsa-miR-6759-5p	0.103401	-4.06024	0.582099	0.711337
hsa-miR-1912-3p	0.106168	-4.20304	0.58332	0.711818
hsa-miR-4512	0.0623422	-3.24575	0.583544	0.711818
hsa-miR-4422	0.0481185	-1.91134	0.584208	0.711987
hsa-miR-4474-3p	0.0777763	-3.77837	0.586551	0.713619
hsa-miR-450a-2-3p	0.0348742	-1.03626	0.586601	0.713619
hsa-miR-195-3p	0.094041	-4.03925	0.588736	0.715573
hsa-miR-125b-1-3p	0.0706646	-2.60776	0.591653	0.718474
hsa-miR-874-5p	-0.0325819	-1.18003	0.593319	0.719851
hsa-miR-518b	-0.128966	-4.24579	0.593862	0.719865
hsa-miR-4797-3p	-0.0368915	-1.5947	0.5945	0.719994
hsa-miR-3164	-0.039188	-1.93676	0.597069	0.722033
hsa-miR-323b-3p	0.0406842	2.7307	0.597594	0.722033
hsa-miR-6838-3p	-0.0895173	-3.94049	0.597784	0.722033
hsa-miR-548a-3p	-0.0563035	-3.10666	0.60018	0.724281
hsa-miR-6508-5p	-0.0647025	-3.45772	0.602637	0.726316
hsa-miR-6832-5p	0.0554733	-2.98687	0.603147	0.726316
hsa-miR-4767	0.0857168	-3.95723	0.603475	0.726316
hsa-miR-186-5p	-0.0199053	9.79117	0.604661	0.727097
hsa-miR-6736-5p	0.0677182	-3.51181	0.606001	0.728061
hsa-miR-6724-5p	-0.0588476	-3.1999	0.606749	0.728314
hsa-miR-1255b-5p	0.0193714	2.12369	0.609058	0.730438
hsa-miR-675-3p	-0.103568	-4.2251	0.610764	0.731836
hsa-miR-873-3p	-0.0784337	-3.82946	0.615886	0.737321
hsa-miR-3685	-0.0296112	-1.32978	0.619239	0.740679
hsa-miR-4429	0.0301296	-0.748176	0.623972	0.745682
hsa-miR-4469	-0.0811184	-3.93052	0.626664	0.748239
hsa-miR-30d-5p	0.0144478	12.9503	0.627351	0.748399
hsa-miR-3163	-0.0214516	1.22177	0.628972	0.749673
hsa-miR-3173-3p	0.0427375	-2.38519	0.631457	0.751877
hsa-miR-5588-5p	-0.0552285	-3.27391	0.632065	0.751877
hsa-miR-1248	0.0629805	-3.47478	0.632488	0.751877
hsa-miR-1301-3p	0.0131889	4.9159	0.63454	0.751931
hsa-miR-4749-5p	0.0496417	-2.97532	0.634629	0.751931
hsa-miR-1250-5p	0.0554706	-3.30347	0.634976	0.751931
hsa-miR-139-3p	0.0304921	-0.600823	0.635031	0.751931
hsa-miR-133b	-0.0594322	-3.45509	0.635309	0.751931
hsa-miR-3613-3p	-0.0238693	3.88522	0.636418	0.752348
hsa-miR-6505-3p	-0.023038	0.263819	0.636774	0.752348
hsa-miR-199b-5p	-0.0338919	0.376866	0.64597	0.762549
hsa-miR-7847-3p	-0.0483941	-1.37523	0.649568	0.766128
hsa-miR-340-3p	-0.022434	5.75232	0.651879	0.767716
hsa-miR-4712-3p	-0.0754089	-3.94779	0.652048	0.767716
hsa-miR-6890-5p	-0.0802821	-3.96111	0.65415	0.769358
hsa-let-7b-5p	0.0278871	12.0479	0.654579	0.769358
hsa-miR-3679-3p	0.0721261	-3.85597	0.656716	0.770131
hsa-miR-4738-5p	0.0677375	-3.8329	0.656745	0.770131
hsa-miR-4640-3p	-0.0845485	-4.12613	0.656943	0.770131
hsa-miR-4772-5p	-0.043569	-2.56971	0.658349	0.771112
hsa-miR-1255a	0.0321316	-0.0990752	0.659238	0.771485
hsa-miR-941	-0.0157776	5.44459	0.659862	0.771548
hsa-miR-6825-3p	0.0435129	-2.72397	0.661522	0.772456
hsa-miR-6796-3p	-0.0556159	-3.11473	0.661779	0.772456
hsa-miR-3529-5p	0.0559244	-3.57011	0.666232	0.776937
hsa-miR-3191-5p	-0.0341353	-2.23083	0.666766	0.776937
hsa-miR-6742-5p	0.0513669	-3.47704	0.667407	0.777015
hsa-miR-381-3p	-0.0453739	-2.66654	0.677128	0.787656
hsa-miR-7151-3p	-0.0795536	-4.1532	0.679165	0.789347
hsa-miR-324-5p	-0.0117337	7.28812	0.67997	0.789605
hsa-miR-3620-5p	-0.0435285	-1.29211	0.684287	0.793633
hsa-miR-6505-5p	0.0283667	-1.87731	0.684611	0.793633
hsa-miR-30c-5p	0.0145821	11.8858	0.685795	0.793975
hsa-miR-6766-5p	-0.0637212	-3.80701	0.686079	0.793975
hsa-miR-4318	0.0499132	-3.89177	0.687624	0.795083
hsa-miR-4659a-5p	0.0257385	-1.16396	0.690097	0.797262
hsa-miR-597-3p	-0.0196235	-0.0708865	0.692485	0.799339
hsa-miR-3150b-3p	0.0291133	-1.73355	0.695111	0.801337
hsa-miR-323a-3p	-0.0275804	2.06761	0.6954	0.801337
hsa-miR-30c-2-3p	-0.0619405	-3.46963	0.698286	0.803979
hsa-miR-6850-5p	0.0285467	-1.77181	0.700668	0.806036
hsa-miR-5585-3p	0.0438021	-2.60674	0.701416	0.806212
hsa-miR-6804-5p	-0.0218297	-0.699769	0.703535	0.807961
hsa-miR-6843-3p	-0.0362982	-2.70519	0.704964	0.808916
hsa-miR-6758-3p	0.0149432	1.06471	0.706198	0.809242
hsa-miR-138-2-3p	-0.0634831	-3.97291	0.706444	0.809242
hsa-miR-1224-5p	0.0348163	-1.84188	0.7101	0.812743
hsa-miR-4638-3p	-0.0315954	-2.475	0.713644	0.81611
hsa-miR-6854-3p	-0.0491877	-3.63806	0.718114	0.82035
hsa-miR-5701	0.0546501	-3.41541	0.718563	0.82035
hsa-miR-6846-3p	0.0544979	-3.85304	0.722052	0.823639
hsa-miR-6733-3p	0.036224	-3.00139	0.72616	0.827627
hsa-miR-6886-3p	0.0328777	-2.21227	0.728216	0.828617
hsa-miR-181b-3p	-0.0557887	-4.02748	0.728358	0.828617
hsa-miR-3183	0.0637423	-4.12515	0.729655	0.828617
hsa-miR-1343-5p	-0.0657343	-3.89409	0.72995	0.828617
hsa-miR-6821-5p	0.0605252	-4.03147	0.730088	0.828617
hsa-miR-3199	0.0190256	-1.05013	0.738214	0.836834
hsa-miR-5009-5p	0.0180264	-0.971	0.738565	0.836834
hsa-miR-3928-5p	0.0388083	-3.30869	0.739562	0.837263
hsa-miR-4773	-0.0426517	-3.35238	0.745101	0.84283
hsa-miR-28-5p	0.0130781	4.27717	0.748709	0.845719
hsa-miR-6800-5p	0.0635824	-4.22045	0.748905	0.845719
hsa-miR-6805-5p	-0.0283013	-2.07962	0.751125	0.84752
hsa-miR-6801-3p	-0.039769	-3.24478	0.753383	0.848695
hsa-miR-6777-5p	-0.048275	-3.75877	0.753421	0.848695
hsa-miR-194-3p	-0.0150335	0.0598995	0.756206	0.851125
hsa-miR-5009-3p	0.0549893	-4.13554	0.759794	0.85378
hsa-miR-4722-3p	-0.0500602	-3.89955	0.759826	0.85378
hsa-miR-326	0.0143718	3.81137	0.760729	0.854085
hsa-miR-3918	-0.0341589	-3.18523	0.762882	0.855793
hsa-miR-501-5p	-0.00953376	5.119	0.764887	0.857332
hsa-miR-3661	0.0189597	-1.56388	0.766482	0.858409
hsa-miR-3192-5p	-0.0281842	-2.30222	0.76743	0.858761
hsa-miR-432-5p	-0.0259012	0.143195	0.768451	0.859193
hsa-miR-4440	-0.0198845	-0.114046	0.76936	0.859499
hsa-miR-145-3p	0.019468	-0.150304	0.773419	0.863322
hsa-miR-1908-5p	0.014431	3.16537	0.775453	0.864521
hsa-miR-7112-3p	0.0408111	-3.76695	0.775864	0.864521
hsa-miR-4670-5p	-0.0350159	-3.53509	0.776409	0.864521
hsa-miR-4786-5p	-0.023323	-2.36303	0.778003	0.865584
hsa-miR-1306-3p	-0.0149002	2.30876	0.782596	0.869465
hsa-miR-4707-3p	-0.0395344	2.21596	0.782775	0.869465
hsa-miR-4516	0.0202215	-0.0594864	0.783579	0.869645
hsa-miR-6876-5p	-0.0280177	-3.00063	0.78492	0.869804
hsa-miR-378b	-0.0387529	-3.90817	0.785008	0.869804
hsa-miR-4488	-0.0201027	-1.23989	0.785771	0.869938
hsa-miR-7976	-0.0110902	4.12226	0.790103	0.873756
hsa-miR-6833-5p	-0.050458	-4.04309	0.790959	0.873756
hsa-miR-9903	-0.0200691	-1.55811	0.791155	0.873756
hsa-miR-154-3p	-0.0576332	-4.26463	0.792994	0.875072
hsa-miR-7704	0.0121007	0.777658	0.795377	0.876987
hsa-miR-6805-3p	0.028855	-3.16727	0.798394	0.879598
hsa-miR-6832-3p	0.0158501	-1.53865	0.80402	0.885076
hsa-let-7e-3p	0.022814	-2.53762	0.805402	0.885877
hsa-miR-6868-3p	-0.0239113	0.409065	0.807204	0.886572
hsa-miR-6856-3p	0.0418287	-3.9695	0.807343	0.886572
hsa-miR-193b-5p	-0.0293708	-3.2485	0.808243	0.88684
hsa-miR-5587-5p	-0.0326357	-3.6353	0.808947	0.886894
hsa-miR-4470	-0.0451189	-4.15734	0.811181	0.888624
hsa-miR-6507-5p	-0.0568816	-3.7426	0.81565	0.892797
hsa-miR-10396b-5p	-0.0367128	-3.85131	0.817059	0.893574
hsa-miR-1910-3p	-0.0454347	-4.0933	0.817752	0.893574
hsa-miR-2467-3p	-0.041549	-4.03965	0.819389	0.893574
hsa-miR-1224-3p	0.0150001	0.353035	0.819578	0.893574
hsa-miR-3667-5p	0.0203173	2.148	0.81966	0.893574
hsa-miR-6873-3p	0.00818115	1.58305	0.826474	0.900278
hsa-miR-6827-3p	0.0395389	-4.0116	0.829059	0.902368
hsa-miR-6796-5p	0.0333166	-3.70794	0.834913	0.907802
hsa-miR-522-3p	0.0424494	-3.8438	0.835404	0.907802
hsa-miR-216b-5p	-0.0357919	-3.92995	0.836063	0.907802
hsa-miR-4714-5p	0.0220024	-3.19175	0.837104	0.908204
hsa-miR-2278	-0.0148327	-1.81281	0.83801	0.908459
hsa-miR-6801-5p	-0.0244648	-3.25251	0.839636	0.909494
hsa-miR-4707-5p	-0.023492	-2.06262	0.840324	0.909511
hsa-miR-25-3p	-0.00908675	12.9223	0.841805	0.910387
hsa-miR-6731-5p	0.0370021	-4.0416	0.844035	0.911656
hsa-miR-3680-3p	0.0108818	-0.957115	0.84477	0.911656
hsa-miR-10397-5p	0.0168192	-2.48154	0.844999	0.911656
hsa-miR-3690	0.0192916	-1.55657	0.846974	0.913059
hsa-miR-4747-3p	-0.0151021	-2.05962	0.850869	0.915995
hsa-miR-6815-3p	0.0100773	-0.760016	0.85105	0.915995
hsa-miR-642b-3p	0.0289146	-3.76029	0.852857	0.916904
hsa-miR-616-3p	0.00895554	-0.17318	0.853249	0.916904
hsa-miR-579-5p	-0.00963718	0.0228759	0.854425	0.91744
hsa-miR-3613-5p	-0.738192	0.621218	0.862712	0.924417
hsa-miR-6836-5p	-0.0128045	-2.05408	0.86272	0.924417
hsa-miR-619-5p	-0.0113211	-1.31803	0.863593	0.924417
hsa-miR-4733-5p	-0.0300862	-4.00857	0.863751	0.924417
hsa-miR-6509-5p	-0.0114984	-1.63208	0.864337	0.924417
hsa-miR-6513-5p	0.0096123	-1.07651	0.872207	0.932098
hsa-miR-1268b	-0.0153458	-1.94512	0.873628	0.932205
hsa-miR-6821-3p	-0.0215797	-3.59693	0.873684	0.932205
hsa-miR-4642	0.0299856	-4.08597	0.875068	0.932947
hsa-miR-449a	-0.0304035	-4.18886	0.876897	0.934121
hsa-miR-6818-3p	-0.00637741	2.41907	0.877549	0.934121
hsa-miR-3675-3p	0.0186522	-2.38373	0.880004	0.935414
hsa-miR-6758-5p	-0.0221392	-3.51638	0.880146	0.935414
hsa-miR-6764-3p	-0.0124918	-2.3061	0.883385	0.937787
hsa-miR-3187-5p	-0.0244495	-4.02611	0.883764	0.937787
hsa-miR-4762-3p	-0.0187232	-3.58361	0.884503	0.937836
hsa-miR-99b-5p	0.00609198	5.60092	0.886651	0.939378
hsa-miR-6895-5p	0.0175388	-3.5179	0.891082	0.943334
hsa-miR-7703	-0.0140925	-2.99627	0.892767	0.943587
hsa-miR-2355-5p	-0.0204704	-3.82662	0.892977	0.943587
hsa-miR-4695-5p	-0.0237768	-3.95587	0.893411	0.943587
hsa-miR-625-5p	0.00573804	2.39736	0.894957	0.944056
hsa-miR-6890-3p	0.0271731	-4.22048	0.895249	0.944056
hsa-miR-487a-3p	0.0126546	-2.29887	0.89898	0.946807
hsa-miR-92a-1-5p	-0.0083684	0.381135	0.899852	0.946807
hsa-miR-1256	-0.0101921	-2.24275	0.899956	0.946807
hsa-miR-200b-5p	0.0139388	-3.22497	0.903599	0.948995
hsa-miR-1294	-0.00541143	3.72417	0.903952	0.948995
hsa-miR-576-5p	0.00575066	8.62801	0.90464	0.948995
hsa-miR-940	0.00846006	-1.5713	0.904839	0.948995
hsa-miR-503-3p	0.0104649	-2.5401	0.9065	0.950001
hsa-miR-6782-5p	-0.0166388	-3.60199	0.909901	0.952207
hsa-miR-10400-5p	0.00852162	-1.20621	0.910011	0.952207
hsa-miR-6785-3p	0.0138006	-3.49169	0.911243	0.952759
hsa-miR-6759-3p	0.0196435	-4.05597	0.913014	0.953587
hsa-miR-581	0.00730911	-0.600182	0.913443	0.953587
hsa-miR-3064-5p	0.00823793	-1.66821	0.914226	0.953669
hsa-miR-450a-1-3p	-0.0139685	-3.61523	0.915601	0.954368
hsa-miR-6788-3p	-0.0225739	-4.07666	0.920344	0.958573
hsa-miR-3120-3p	-0.00712892	-1.69355	0.923004	0.960605
hsa-miR-11400	0.00758012	-1.13987	0.924414	0.961149
hsa-miR-4511	-0.00393204	1.5865	0.924946	0.961149
hsa-miR-4489	0.00787779	-2.53062	0.928483	0.964085
hsa-miR-4743-3p	-0.0120403	-3.65211	0.931727	0.966711
hsa-miR-664a-5p	-0.00316023	2.36303	0.933205	0.966715
hsa-miR-26b-3p	0.00367659	4.96474	0.933598	0.966715
hsa-miR-548j-3p	-0.0137755	-4.02125	0.934573	0.966715
hsa-miR-6866-5p	0.00425789	-0.722077	0.934587	0.966715
hsa-miR-548at-3p	-0.0057861	-1.47647	0.936232	0.967678
hsa-miR-148a-5p	-0.00289367	2.39818	0.937193	0.967849
hsa-miR-3115	0.0122927	-4.08513	0.937827	0.967849
hsa-miR-4748	-0.00815083	-2.9212	0.940537	0.969574
hsa-miR-3184-5p	-0.0133402	-4.03002	0.94093	0.969574
hsa-miR-4999-3p	0.0122558	-3.98311	0.941937	0.969873
hsa-miR-4657	-0.00658359	-2.56778	0.943009	0.970239
hsa-miR-6718-5p	0.0057004	-2.1414	0.945974	0.972263
hsa-miR-6768-5p	0.0074325	-3.21308	0.946968	0.972263
hsa-miR-5584-5p	0.0051403	-1.63917	0.947131	0.972263
hsa-miR-4799-5p	0.007115	-3.14866	0.951264	0.975766
hsa-miR-212-5p	-0.00346939	-0.950747	0.952654	0.976452
hsa-miR-6876-3p	-0.00605078	-3.26469	0.954905	0.978019
hsa-miR-139-5p	-0.0029904	3.56243	0.957244	0.979673
hsa-miR-424-3p	0.00189364	4.80369	0.960648	0.981503
hsa-miR-4717-3p	-0.00483155	-2.70665	0.961051	0.981503
hsa-miR-4731-3p	0.00908945	-3.98135	0.961206	0.981503
hsa-miR-5188	0.00344094	-2.33887	0.964208	0.983826
hsa-miR-103a-2-5p	0.00215699	2.58945	0.96578	0.9845
hsa-miR-3619-3p	-0.00263711	-1.30134	0.966322	0.9845
hsa-miR-4521	0.00203618	-0.383157	0.969205	0.986694
hsa-miR-6847-5p	0.0030881	-2.56799	0.972968	0.988684
hsa-miR-4709-5p	-0.00591666	-3.94336	0.973046	0.988684
hsa-miR-4804-3p	0.0018898	1.13716	0.973785	0.988684
hsa-miR-6502-5p	-0.00576651	-3.58096	0.975345	0.988684
hsa-miR-3913-3p	0.00181026	-0.900722	0.975382	0.988684
hsa-miR-219a-1-3p	0.0014302	-0.393635	0.97597	0.988684
hsa-miR-335-3p	0.00160344	3.26091	0.976271	0.988684
hsa-miR-181a-3p	-0.00122871	1.96181	0.979965	0.990271
hsa-miR-517a-3p	0.0063471	-3.08988	0.980031	0.990271
hsa-miR-517b-3p	0.0063471	-3.08988	0.980031	0.990271
hsa-miR-1288-3p	-0.00163599	-1.55932	0.982906	0.992434
hsa-miR-4746-5p	0.00102375	-0.46499	0.9848	0.993306
hsa-miR-3122	0.0015319	-2.73608	0.98592	0.993306
hsa-miR-5189-5p	0.00142675	0.196854	0.98681	0.993306
hsa-miR-2115-3p	0.000994377	-1.64336	0.987386	0.993306
hsa-miR-3922-5p	-0.00193145	-3.96235	0.987437	0.993306
hsa-miR-5088-3p	0.00436108	-4.05248	0.9882	0.993335
hsa-miR-223-3p	0.000307597	12.8104	0.993601	0.997469
hsa-miR-3121-3p	0.00067989	-2.86856	0.994283	0.997469
hsa-miR-6501-3p	1.84066e-05	-3.23852	0.994522	0.997469
hsa-miR-100-5p	0.000164949	7.68478	0.999204	1
hsa-miR-624-3p	-0.836627	-3.22429	1	1
hsa-miR-374a-3p	-0.575981	-2.78543	1	1
hsa-miR-548ad-5p	-0.537031	-0.335855	1	1
