# Supplementary material
Source: Research Square preprint supplement (doi:10.21203/rs.3.rs-9074426/v1)
Supplement: Supplementary file 2 [file 7ce12465e7cfc9bbf018cbfb.xlsx]

## Sheet: Pre-clinical Stage
ID	logFC	AveExpr	P.Value	adj.P.Val
NDUFA11	-0.517226	3.84844	2.26036e-76	8.42345e-72
LINC03126	-5.75385	5.80953	9.79631e-73	1.82535e-68
RNU1-83P	-3.0673	-0.394769	2.20089e-70	2.73394e-66
MT-RNR2	1.68985	6.25009	6.75149e-69	6.29003e-65
KCNA3	0.397438	5.38394	1.01123e-66	7.53693e-63
TAF10	0.251599	5.06701	2.3665e-64	1.46983e-60
NDUFAF3	0.280553	4.50027	1.43388e-60	7.63357e-57
MT-ATP8	0.897685	0.209096	3.32141e-58	1.5472e-54
HIGD2A	0.397696	4.43345	7.49412e-58	3.10306e-54
RNVU1-29	-2.05512	3.38476	1.47422e-57	5.49381e-54
B3GALT6	0.242733	4.23754	2.71764e-57	9.20687e-54
PGP	0.272419	4.07526	3.68664e-55	1.14489e-51
MIR8075	0.901473	-1.99334	1.09109e-54	3.12773e-51
RABAC1	-0.351647	3.11153	6.04948e-54	1.61028e-50
RNU6ATAC	-1.83289	2.93008	9.90789e-54	2.46152e-50
DALRD3	0.239848	3.89096	1.17042e-53	2.72606e-50
RNU1-88P	-2.66777	-0.556642	2.08945e-52	4.58033e-49
RNU1-28P	-2.73899	1.05768	4.94428e-51	1.02363e-47
CTU1	0.264909	3.04004	1.04593e-49	2.05146e-46
BLOC1S1	-0.370801	2.74991	2.38811e-49	4.44976e-46
CCDC71	0.235189	4.02975	4.79189e-49	8.50355e-46
CHTF8	0.243337	5.31835	1.48856e-48	2.52148e-45
RNU2-36P	-2.2475	-1.92923	6.21643e-47	1.00722e-43
ORAI1	0.301737	4.09091	1.22615e-46	1.90391e-43
CEBPD	0.399399	6.76579	1.66163e-46	2.4769e-43
MAD2L1BP	0.243869	3.75208	2.12193e-46	3.04138e-43
MIR3181	0.372508	0.730993	2.53967e-46	3.50531e-43
H3C11	0.403115	4.24622	3.46314e-46	4.60919e-43
RNU4-2	-1.75978	7.6301	9.61604e-46	1.23569e-42
TAPT1-AS1	0.235057	3.41005	9.9664e-46	1.23803e-42
RPSAP3	-0.982551	-1.54785	3.22303e-45	3.8745e-42
RNU1-67P	-2.60568	2.78262	5.60773e-45	6.53056e-42
STUB1	0.218884	4.29224	1.32052e-44	1.45028e-41
PDF	0.256227	1.91498	1.32318e-44	1.45028e-41
YRDC	0.244507	3.65443	7.87834e-44	8.3884e-41
MTATP6P11	0.518597	0.829274	8.17645e-44	8.46399e-41
YDJC	0.244774	3.31784	1.46957e-43	1.48013e-40
MTCYBP23	0.627601	2.21855	1.79374e-43	1.75909e-40
SNORA14B	-1.44808	2.71293	1.90103e-43	1.81651e-40
SNORD3A	-1.71042	2.64515	1.98649e-43	1.85071e-40
MTRFR	0.172456	4.34485	4.98931e-43	4.53492e-40
PRR13P2	0.740945	-1.95793	5.92517e-43	5.25732e-40
SNORD89	-1.14165	3.08484	1.31915e-42	1.14324e-39
NUDT19	0.205535	3.51582	1.37944e-42	1.16832e-39
H2BC21	0.320654	6.8263	1.9321e-42	1.60004e-39
MT-RNR1	1.15915	3.42748	2.65791e-42	2.15325e-39
H1-4	0.369008	7.67084	5.27589e-42	4.18322e-39
SNORA71B	-1.47094	3.70764	1.22317e-41	9.49637e-39
PDXP	0.480343	-0.36754	1.38482e-41	1.05319e-38
RPL21P16	-1.1005	1.5518	1.97427e-40	1.47146e-37
C17orf67	0.196581	3.07856	2.02319e-40	1.47836e-37
RNU1-19P	-1.58895	-0.92446	4.95193e-40	3.54882e-37
OXA1L	0.217052	5.90825	6.1667e-40	4.336e-37
CLPP	0.221871	3.18846	6.72811e-40	4.64315e-37
RNU1-2	-2.09149	3.0472	1.59579e-39	1.08125e-36
RPL6P30	-0.931627	-1.65468	3.14244e-39	2.09118e-36
ZMYND19	0.185373	2.95126	4.26853e-39	2.79072e-36
ATP5MF	-0.279863	3.58622	4.3484e-39	2.79392e-36
TNFAIP1	0.206908	3.86716	7.20008e-39	4.54776e-36
JUND	0.448299	5.74217	1.66507e-38	1.03418e-35
GSTK1	0.221416	6.57709	2.7602e-38	1.68626e-35
TOR3A	0.195009	4.64412	4.36047e-38	2.62092e-35
CSGALNACT2-DT	0.26021	1.18793	9.44262e-38	5.58553e-35
LSM10	0.232392	3.99188	1.12556e-37	6.55392e-35
MTND4P14	0.491182	0.919852	1.45395e-37	8.33584e-35
SNORA26	-1.51313	2.98065	2.0053e-37	1.12073e-34
SNORA68B	-1.21342	3.32978	2.01494e-37	1.12073e-34
ERG28	0.167896	2.62377	3.20832e-37	1.75826e-34
SDR39U1	0.206752	3.90402	3.32419e-37	1.79535e-34
RNU5B-1	-1.55644	0.623512	3.53314e-37	1.86726e-34
MTND5P14	0.493931	0.388327	3.55755e-37	1.86726e-34
RPL13AP5	-0.550224	4.06562	3.73583e-37	1.93361e-34
KIAA2013	0.228271	5.37762	4.25712e-37	2.17323e-34
DUS1L	0.223729	4.82502	8.91353e-37	4.4888e-34
SNRNP35	0.155649	4.75323	1.66267e-36	8.26145e-34
TMEM216	0.20414	3.04267	2.12796e-36	1.04343e-33
SNORA20	-1.3155	0.312672	2.20063e-36	1.06505e-33
FTLP2	0.625255	-0.404136	3.7198e-36	1.77721e-33
RNU1-11P	-2.41478	2.08392	4.54483e-36	2.14389e-33
ZNF174	0.167268	3.14585	4.95306e-36	2.30726e-33
TAF3	0.162332	3.72654	5.1694e-36	2.3783e-33
ERCC1	0.194676	4.42129	5.85277e-36	2.65987e-33
RPL13AP22	-0.627394	1.63676	7.47086e-36	3.35432e-33
RITA1	0.165676	2.96723	1.00449e-35	4.45634e-33
RNU1-3	-2.25623	3.96862	1.35714e-35	5.95004e-33
MTND5P32	0.591491	2.64317	1.58352e-35	6.8618e-33
RNY3P1	-1.61112	1.81318	2.12649e-35	9.10869e-33
PPP1R35	0.256212	3.6525	2.53744e-35	1.07455e-32
PI4K2A	0.219253	3.42456	3.17325e-35	1.31801e-32
SNORA23	-1.01543	4.43176	3.18308e-35	1.31801e-32
CDC42EP2	0.392874	1.09537	3.77147e-35	1.54448e-32
NOB1	0.203539	2.43989	4.2581e-35	1.72481e-32
FKBP2	0.239785	4.1162	4.91951e-35	1.9713e-32
ANKRD16	0.192744	2.29683	5.20384e-35	2.06305e-32
RN7SKP90	1.92815	0.145723	5.91019e-35	2.31841e-32
SNORA38	-1.08947	1.21539	6.56474e-35	2.54835e-32
RNU1-27P	-2.43168	2.2764	1.38668e-34	5.32744e-32
SNORA37	-0.795463	2.65159	1.57171e-34	5.97666e-32
RNF25	0.155755	3.19921	1.62056e-34	6.10017e-32
ZNF747	0.184062	2.8316	1.74679e-34	6.50959e-32
SNORA74B	-1.02434	4.87483	1.77013e-34	6.53126e-32
RNU5A-1	-1.38256	1.20498	2.45528e-34	8.97043e-32
SLC7A5P1	0.246731	1.67314	2.80008e-34	1.01309e-31
PNISR-AS1	0.213014	2.78532	2.87438e-34	1.02997e-31
ANAPC1P2	0.240103	4.58298	3.96002e-34	1.40547e-31
RPS3AP49	-1.18426	-1.72419	4.44469e-34	1.5626e-31
ZBED5-AS1	0.179447	2.98629	4.61381e-34	1.6069e-31
GPBAR1	0.305212	2.82149	6.09648e-34	2.10362e-31
PAGR1	0.257331	1.93222	6.24711e-34	2.13074e-31
RGS19	0.257716	6.01518	6.28942e-34	2.13074e-31
DDX56	0.172383	5.02835	7.58817e-34	2.54757e-31
SNORA79B	-1.1077	2.46275	8.39524e-34	2.79337e-31
RNU1-18P	-2.54092	-1.96351	1.0466e-33	3.45156e-31
RNVU1-2A	-0.798254	-1.45987	1.0563e-33	3.45297e-31
NRF1	0.170146	5.24671	1.27395e-33	4.12826e-31
TIGD5	0.215786	3.20677	1.29293e-33	4.15365e-31
PIGL	0.184231	4.41974	1.48101e-33	4.71721e-31
POLR2C	0.163609	4.97176	1.93823e-33	6.12119e-31
PET100	-0.297536	2.46487	2.04359e-33	6.3997e-31
MT-ND4L	0.738013	2.92385	2.12595e-33	6.60214e-31
RNVU1-28	-1.51829	2.80473	2.39977e-33	7.39088e-31
HMGXB3	0.17346	5.37922	2.66398e-33	8.13736e-31
H2AC16	0.453298	2.98033	2.76309e-33	8.37149e-31
RNY3	-1.54315	4.6262	2.85704e-33	8.58633e-31
MIR3648-1	0.780656	4.68302	2.90796e-33	8.66943e-31
ATF4P3	0.31928	0.773283	3.67326e-33	1.08641e-30
RNVU1-31	-1.72218	0.918399	3.79516e-33	1.11363e-30
SNORD9	-1.07998	1.51824	4.72601e-33	1.37593e-30
RNU4-1	-1.74212	6.71063	9.72338e-33	2.80892e-30
SLA2	0.271335	4.77835	1.3443e-32	3.85358e-30
FBXL6	0.295453	2.51008	1.48009e-32	4.21047e-30
RN7SL678P	-1.41755	-2.41091	1.58305e-32	4.46924e-30
MIR548O	-0.540328	-1.43665	1.66127e-32	4.65481e-30
STX11	0.294343	6.22951	1.78385e-32	4.96098e-30
MAPKAPK5	0.146003	5.77034	1.81455e-32	5.00897e-30
MARS2	0.188264	4.01586	2.15421e-32	5.90285e-30
SNORA74D	-0.888627	1.65435	2.58966e-32	7.04424e-30
NCK2	0.188956	6.30669	2.7779e-32	7.50153e-30
SNORA74A	-0.952472	3.5015	4.08038e-32	1.09395e-29
GEMIN4	0.171001	3.99926	5.7441e-32	1.529e-29
ATP6V0E2-AS1	0.25022	2.73076	6.9072e-32	1.82556e-29
EIF2D	0.128848	4.87715	9.90838e-32	2.60032e-29
RPL39P3	-0.984832	-0.444375	1.08369e-31	2.82412e-29
MAL-AS1	0.356074	1.26121	1.10311e-31	2.85475e-29
SNORA38B	-1.1159	2.44251	1.21346e-31	3.11868e-29
MTND1P11	0.594212	-0.658089	1.45095e-31	3.70351e-29
PPP1R14BP3	0.391373	2.82762	1.55888e-31	3.95191e-29
ZNF689	0.151176	3.59076	1.601e-31	4.03126e-29
H2BC7	0.327745	4.76482	1.75455e-31	4.38826e-29
POMK	0.16584	4.28641	2.3669e-31	5.86581e-29
KMT5A	0.201342	3.63155	2.3768e-31	5.86581e-29
SETP14	-0.441841	0.242168	2.81887e-31	6.91106e-29
MTND3P12	0.442559	1.4718	2.86435e-31	6.97665e-29
SNORA71D	-1.12813	3.0527	3.76512e-31	9.11111e-29
RPL7AP6	-0.568275	2.65596	5.13794e-31	1.23529e-28
SUSD3	0.224078	4.01121	5.37826e-31	1.28435e-28
ZBTB11-AS1	0.174452	3.94758	5.41093e-31	1.28435e-28
SNORA54	-1.09363	4.9507	5.52185e-31	1.30239e-28
RN7SL622P	1.03237	-1.94453	6.1795e-31	1.44834e-28
SGF29	0.182569	3.23767	6.93803e-31	1.61595e-28
MRPL34	0.23887	3.39198	7.00661e-31	1.62179e-28
TPTEP2-CSNK1E	0.290307	0.381421	7.90303e-31	1.81799e-28
ALG12	0.206568	3.87955	1.00308e-30	2.29331e-28
ERVK3-1	0.194487	4.97008	1.03364e-30	2.34877e-28
MTCO1P11	0.417856	2.35744	1.10385e-30	2.4931e-28
C2	0.232947	1.82219	1.11448e-30	2.50195e-28
CEBPB	0.262898	7.34324	1.21626e-30	2.71408e-28
RNU4-7P	-1.45591	-1.79712	1.43124e-30	3.1748e-28
JUNB	0.267497	7.2783	1.49304e-30	3.29228e-28
FBXW5	0.203761	5.98797	1.59906e-30	3.50532e-28
WRNIP1	0.145671	5.61254	1.77801e-30	3.87481e-28
H2BC12	0.264912	6.40379	2.0411e-30	4.42231e-28
ARF5	0.192347	4.24472	2.4936e-30	5.37147e-28
SNORD94	-1.06905	5.55798	2.89148e-30	6.19275e-28
DCPS	0.187098	3.56601	3.14073e-30	6.68813e-28
RNVU1-7	-2.2702	5.02154	4.62412e-30	9.79105e-28
ENTR1	0.168659	4.2406	4.68547e-30	9.86489e-28
SNORA7B	-0.9008	3.90324	5.18117e-30	1.08473e-27
NDUFB8	-0.20376	3.89347	7.3423e-30	1.52859e-27
URGCP	0.160977	4.57207	1.05955e-29	2.19362e-27
PSMD9	0.161039	3.5363	1.83098e-29	3.76981e-27
TWF2	0.1868	5.95023	2.07248e-29	4.24357e-27
B3GALT4	0.18908	4.8921	2.23569e-29	4.55274e-27
COG8	0.137914	5.08762	2.4131e-29	4.88731e-27
SNORA53	-0.715247	4.34459	2.841e-29	5.72285e-27
SNORA46	-0.710717	1.26371	2.92271e-29	5.85578e-27
PAIP1P2	-0.464201	0.203989	2.98484e-29	5.94829e-27
RABIF	0.147083	4.03696	3.99439e-29	7.91781e-27
RPL10P16	-0.500026	2.76073	4.57106e-29	9.01298e-27
RPL26	-0.794936	4.84049	5.77508e-29	1.13271e-26
TMEM69	0.183387	3.73604	6.79832e-29	1.32642e-26
NACA3P	-0.527728	0.159439	6.94957e-29	1.34887e-26
RPL15P3	-0.476649	0.506237	7.99581e-29	1.5439e-26
RPL31P2	-1.2157	-2.16039	9.12834e-29	1.75349e-26
MTCYBP32	0.49051	-1.48098	9.44697e-29	1.80491e-26
RPL19P5	0.507012	-0.562267	9.49292e-29	1.80491e-26
MMS19	0.174575	5.37109	1.04498e-28	1.97676e-26
NOP16	0.164776	2.27133	1.43433e-28	2.69958e-26
TIMM17B	0.204783	4.27174	2.21738e-28	4.15241e-26
PLPP1	0.20865	2.24162	2.24763e-28	4.18801e-26
EXT1	0.195395	4.93745	2.55129e-28	4.73017e-26
MRPL10	0.188837	3.06166	2.58356e-28	4.76628e-26
TSSK6	0.211239	1.79016	2.93367e-28	5.38553e-26
CCDC85B	0.246332	4.2334	3.10278e-28	5.66804e-26
RIOX1	0.158858	4.45919	3.99719e-28	7.26631e-26
CUTA	0.196273	3.59771	4.0912e-28	7.4011e-26
SELPLG	0.250286	7.37044	4.28503e-28	7.7143e-26
DDRGK1	0.167538	4.72062	4.69488e-28	8.4115e-26
GADD45GIP1	0.233635	2.91182	5.35497e-28	9.54824e-26
BORCS6	0.180627	4.16195	6.07516e-28	1.07808e-25
RPS28P7	-0.67596	1.40186	6.9595e-28	1.22916e-25
DUSP1	0.303319	8.55734	7.13482e-28	1.25418e-25
RPS27P3	-0.755738	1.16165	1.32599e-27	2.31992e-25
VMAC	0.221434	3.55487	1.40511e-27	2.44686e-25
NUPR2P1	0.191772	1.14589	1.4168e-27	2.45574e-25
IKZF1	0.192364	8.75689	1.85249e-27	3.19606e-25
ZNF875	0.183048	5.26456	1.91549e-27	3.28952e-25
RAB43	0.208221	3.87933	2.26251e-27	3.86764e-25
RPSAP17	-0.54361	-1.12394	2.56622e-27	4.36678e-25
RPL23AP37	0.471062	0.0682695	2.63186e-27	4.45814e-25
YIPF1	0.162481	4.55945	2.64539e-27	4.46077e-25
KLHL36	0.166779	6.71605	2.69293e-27	4.52048e-25
PSMB2	0.164301	4.48012	2.84793e-27	4.75923e-25
HNRNPA1L3	-0.419678	0.945192	2.88982e-27	4.80768e-25
PIP5K1A	0.150688	5.52358	2.93403e-27	4.85954e-25
BAG3	0.254918	1.85989	3.11869e-27	5.14253e-25
DOLPP1	0.14604	2.56038	3.62318e-27	5.94809e-25
ATP5MG	-0.350668	4.77907	3.80134e-27	6.2132e-25
SELENOO	0.216272	4.64513	3.81864e-27	6.21422e-25
NLE1	0.175915	3.56603	3.84916e-27	6.23664e-25
UQCR11	-0.336539	4.92459	4.09802e-27	6.61112e-25
ZNF236-DT	0.201156	1.47927	4.32684e-27	6.95017e-25
FTLP17	0.490328	-0.912194	4.44154e-27	7.1038e-25
ERAL1	0.172787	2.73568	4.92665e-27	7.846e-25
ARFIP2	0.118935	3.99573	5.45823e-27	8.65558e-25
CMTM7	0.201111	5.15278	5.62781e-27	8.88669e-25
CHST11	0.206382	7.55979	6.07213e-27	9.54785e-25
DVL1	0.163685	4.30256	6.33589e-27	9.92072e-25
SNORA71A	-0.922805	2.18463	7.40308e-27	1.15432e-24
RN7SL14P	-1.29073	1.60153	7.82406e-27	1.21488e-24
SNORA40B	-0.673818	0.52585	7.98728e-27	1.23508e-24
ZNF783	0.164148	5.12578	9.20909e-27	1.41812e-24
RNY1	-1.42935	7.60751	1.11066e-26	1.70329e-24
MIR142HG	0.232751	6.14285	1.12945e-26	1.725e-24
RPS21	-0.529462	6.58369	1.21334e-26	1.84556e-24
RPS18P5	-0.636877	1.50145	1.40556e-26	2.12925e-24
ZNF792	0.155173	4.78661	1.51277e-26	2.28239e-24
SNORA80A	-0.943936	1.30752	1.51908e-26	2.28267e-24
AHCYL2	0.153369	4.71681	1.66092e-26	2.48578e-24
SYNGR2	0.18316	5.49336	1.6978e-26	2.53081e-24
NCF1	0.305929	7.21097	1.7615e-26	2.6153e-24
ZSCAN2	0.116131	3.3457	1.99196e-26	2.94573e-24
NCOA5	0.150673	4.61874	2.01739e-26	2.97154e-24
CSRNP2	0.157133	4.28849	2.14213e-26	3.14286e-24
PPP1R3F	0.167677	4.10828	2.17949e-26	3.18513e-24
MCAT	0.142533	2.37976	2.33073e-26	3.39285e-24
INTS15	0.154123	4.65796	2.48813e-26	3.60789e-24
LEF1	0.292935	6.93493	2.52891e-26	3.6528e-24
SCML4	0.20986	6.01912	3.23423e-26	4.64342e-24
C1orf122	0.186435	3.15638	3.23965e-26	4.64342e-24
NEDD8	-0.241826	4.86414	3.56915e-26	5.09609e-24
QARS1	0.151022	6.13025	3.66317e-26	5.21036e-24
EIF2S2P4	-0.425418	-0.365635	3.91811e-26	5.5518e-24
TMEM256	-0.411892	2.28092	4.03953e-26	5.70217e-24
HBA1	0.870097	0.260814	4.21247e-26	5.92384e-24
LINC01138	0.195213	5.22763	4.79747e-26	6.72114e-24
LSM12	0.146202	2.87735	5.24346e-26	7.31846e-24
ROMO1	-0.353785	3.57694	5.41236e-26	7.52601e-24
MIR3609	-0.830719	5.57726	5.76384e-26	7.98495e-24
SNORD3C	-1.61329	-0.259987	6.99982e-26	9.66131e-24
RPSAP12	-0.485859	-0.405195	7.96471e-26	1.09525e-23
TESK1	0.255433	2.40009	8.48343e-26	1.16229e-23
CCDC92	0.155572	4.29826	9.95857e-26	1.3594e-23
SNORA49	-0.8652	4.23021	1.05657e-25	1.43701e-23
SLC6A19	1.05647	0.756662	1.10061e-25	1.49147e-23
CDCA4P4	0.21317	2.15583	1.31689e-25	1.77809e-23
SNORA10B	-1.1534	-0.951753	1.4347e-25	1.93017e-23
RNU1-148P	-1.72146	-2.48711	1.58859e-25	2.12952e-23
SNORA14A	-0.826141	-0.559535	1.66578e-25	2.22498e-23
ATP10A	0.23618	5.31576	1.69526e-25	2.25627e-23
FBXL14	0.154078	3.90435	1.80639e-25	2.39562e-23
TCF3P1	0.352945	2.7812	1.91677e-25	2.53299e-23
MRPL37	0.147124	3.78993	2.05164e-25	2.70164e-23
RPL7P1	-0.995257	-0.0726342	2.15094e-25	2.82243e-23
LRRC37B	0.18741	4.71138	2.34995e-25	3.07275e-23
MIR4479	0.254898	0.0798568	2.95745e-25	3.85358e-23
ACTR3C	0.172874	4.18682	3.06115e-25	3.9748e-23
SCAMP3	0.160747	3.46173	3.29692e-25	4.26608e-23
GPATCH1	0.122852	3.74312	3.38418e-25	4.36383e-23
MIR1244-2	-0.432272	-0.458542	3.69055e-25	4.74249e-23
SNAP29	0.160729	4.78921	3.71676e-25	4.75976e-23
RPL6P27	-0.514747	1.14316	4.19288e-25	5.35109e-23
EFNA4	0.168569	2.05973	4.70622e-25	5.98573e-23
FAF1	0.137406	5.38983	5.03391e-25	6.38074e-23
ZBTB40	0.16871	6.2355	5.41862e-25	6.84509e-23
ZNF236	0.147944	5.71889	6.37625e-25	8.02761e-23
NFS1	0.121451	3.84828	6.6411e-25	8.3329e-23
GP9	0.439297	2.98553	6.76831e-25	8.46402e-23
NSMF	0.274622	3.80958	7.51714e-25	9.36903e-23
RNU4ATAC	-1.05397	-0.508508	7.55777e-25	9.38826e-23
TUBA1B-AS1	0.21655	0.578532	7.91846e-25	9.80363e-23
NAGLU	0.192241	3.18061	8.18939e-25	1.01055e-22
RNY4	-1.04405	0.0539129	8.22782e-25	1.01194e-22
ANP32E	-0.355242	5.63365	9.63665e-25	1.18131e-22
RNU6-1 /// RNU6-50P	0.301894	1.43469	1.15843e-24	1.41541e-22
TRIM35	0.144998	4.9681	1.32821e-24	1.61755e-22
SNORA63D	-1.08829	0.194069	1.37601e-24	1.6703e-22
P4HTM	0.161776	4.50673	1.54611e-24	1.86959e-22
USP34-DT	0.19224	3.20948	1.55021e-24	1.86959e-22
ECH1	0.206918	3.44872	1.66499e-24	2.00153e-22
SORL1-AS1	0.255605	3.78218	1.7821e-24	2.13543e-22
TNFRSF10D	0.172604	3.58785	1.8141e-24	2.1668e-22
RNA5SP195	0.535981	-1.61002	2.11909e-24	2.523e-22
EOLA1	0.1325	3.71134	2.13976e-24	2.5395e-22
RPS15AP1	-0.616157	-0.412491	2.4192e-24	2.86203e-22
DOLK	0.150672	2.2825	2.73775e-24	3.22864e-22
MAL	0.277387	3.57848	2.78593e-24	3.27509e-22
CCNL2	0.149049	7.24727	3.00829e-24	3.52538e-22
OGFOD2	0.170348	1.29871	3.21706e-24	3.75821e-22
H2AX	0.313569	2.60998	3.23277e-24	3.76477e-22
SNORA71C	-0.890673	0.816433	3.8308e-24	4.4473e-22
RPL41P5	-0.587914	-0.358623	4.14425e-24	4.79626e-22
RBM15B	0.123967	5.69245	4.2563e-24	4.91068e-22
SIDT1	0.183496	5.92862	4.67011e-24	5.37149e-22
TXNDC11	0.149825	4.90111	5.10099e-24	5.84903e-22
EVA1C	0.240424	2.92124	5.12273e-24	5.85594e-22
TAF13	-0.312578	3.29978	5.21972e-24	5.94857e-22
CCNL2P1	0.29111	1.58481	5.31049e-24	6.03355e-22
MTCO3P11	0.279166	2.58082	5.51018e-24	6.24141e-22
DCTD	0.114729	4.3896	6.19476e-24	6.99557e-22
MPI	0.172661	3.90941	6.24121e-24	7.02673e-22
PLBD1-AS1	0.275491	2.68859	8.10694e-24	9.0998e-22
MTFP1	0.240844	0.423866	8.2868e-24	9.27375e-22
ZNF317	0.126619	5.5639	8.56673e-24	9.55832e-22
LIMD2	0.185222	7.88192	9.07668e-24	1.00971e-21
SNORD67	-0.774879	-1.24881	9.83927e-24	1.09128e-21
SEMA4F	0.164726	3.56895	1.0414e-23	1.1516e-21
TCFL5	0.154895	3.49719	1.06826e-23	1.1778e-21
PSMC1P1	-0.503957	-1.05414	1.2256e-23	1.34729e-21
SDF2L1	0.220707	3.16683	1.25879e-23	1.37971e-21
BOLA1	0.172507	2.5644	1.35854e-23	1.48468e-21
SLC20A2	0.123686	4.79897	1.44305e-23	1.57242e-21
TRPT1	0.191435	1.9012	1.46341e-23	1.58995e-21
PSMA6P1	-0.605505	-1.57824	1.62115e-23	1.75622e-21
WBP1	0.157229	3.60183	1.66553e-23	1.79906e-21
SMG1P3	0.207432	6.23195	1.69764e-23	1.82845e-21
HNRNPA0	-0.184548	5.59236	1.79133e-23	1.9238e-21
ZSCAN2-AS1	0.150965	2.25389	1.83067e-23	1.9604e-21
FAM120C	0.131188	3.47941	2.58187e-23	2.75691e-21
ZFP36	0.259353	5.7548	2.8136e-23	2.99577e-21
BICRAL	0.191929	6.05132	3.06421e-23	3.2533e-21
TUBA4A	0.193144	6.38999	3.35663e-23	3.55364e-21
MRI1	0.215143	4.54985	3.37645e-23	3.5645e-21
BTBD6	0.168108	3.92296	3.47775e-23	3.66107e-21
PIN1	0.136092	5.02255	3.69395e-23	3.87771e-21
RBM14-RBM4	0.180508	3.35031	3.83571e-23	4.01521e-21
COX6A1	-0.263072	4.63709	4.09019e-23	4.26961e-21
PTTG1IP	0.160239	7.52478	4.67732e-23	4.86886e-21
LINC00921	0.186159	5.35999	5.10313e-23	5.2973e-21
SNORA73B	-0.782393	9.07678	5.20393e-23	5.38693e-21
MLX	0.138295	5.65951	6.0693e-23	6.26533e-21
ZNF862	0.170139	5.29587	7.02475e-23	7.23161e-21
TMEM185B	0.176697	4.315	7.60209e-23	7.80439e-21
GTF2IRD2B	0.1496	4.03613	7.84182e-23	8.02839e-21
CERS5	0.130822	5.07812	8.89105e-23	9.07764e-21
TMPO-AS1	0.176766	1.83512	9.62362e-23	9.79874e-21
SNAI3	0.226725	2.72841	9.7163e-23	9.86615e-21
UBE2L3	0.15714	5.26353	1.00343e-22	1.01614e-20
C6orf52	-0.324941	0.0335089	1.02352e-22	1.03367e-20
HBA2	0.940286	2.03236	1.04282e-22	1.05031e-20
KEAP1	0.133715	4.21207	1.0636e-22	1.06836e-20
COQ9	0.110847	4.35796	1.12346e-22	1.12545e-20
NDUFC2	-0.237533	3.72254	1.25583e-22	1.25469e-20
ZNF688	0.15882	3.678	1.26504e-22	1.26051e-20
HTRA2	0.133622	4.78484	1.30948e-22	1.30131e-20
DONSON	0.116039	2.54979	1.39851e-22	1.38609e-20
LIX1L	0.163139	5.42014	1.51978e-22	1.50229e-20
IPO5P1	0.172936	3.38019	1.66955e-22	1.64597e-20
SCMH1	0.144837	3.83112	1.7188e-22	1.69004e-20
TMEM134	0.239786	2.69176	1.73091e-22	1.69748e-20
SLC25A28	0.136724	4.51144	1.74588e-22	1.70518e-20
SMARCD1	0.149176	4.47097	1.74792e-22	1.70518e-20
TM9SF1	0.137197	2.26164	1.89082e-22	1.83977e-20
MT-ND2	0.540541	3.70704	2.24657e-22	2.18023e-20
METTL17	0.130347	4.534	2.29641e-22	2.2228e-20
ELAC2	0.11128	5.50589	2.50552e-22	2.41317e-20
PYM1	0.12965	3.8977	2.50603e-22	2.41317e-20
ZNF213-AS1	0.161956	3.84997	2.73243e-22	2.6244e-20
GBGT1	0.209842	4.4276	2.9416e-22	2.81804e-20
IGHEP2	0.2878	2.51083	2.98059e-22	2.84807e-20
UCK1	0.125928	3.86158	3.10603e-22	2.96034e-20
MBTPS1	0.129696	6.78219	3.2558e-22	3.09473e-20
MEX3D	0.271042	1.53647	3.26364e-22	3.09473e-20
MTCYBP3	0.419542	-0.163923	3.29291e-22	3.11456e-20
MAP2K2	0.248504	5.25761	3.33635e-22	3.14766e-20
RPS29	-0.490986	7.64557	3.38525e-22	3.18573e-20
SCARNA22	-0.745482	-0.292911	4.22441e-22	3.96541e-20
APBA3	0.166168	3.86193	4.48228e-22	4.1969e-20
DFFB	0.112179	3.98277	5.0914e-22	4.75529e-20
MIR4439	0.301981	0.578328	5.17073e-22	4.81731e-20
CYTH1	0.168959	8.52169	5.39589e-22	5.01454e-20
RASSF7	0.185191	3.42246	5.81532e-22	5.39089e-20
METRN	0.26707	1.53353	6.39905e-22	5.91729e-20
TMSB4XP4	-0.516398	3.75315	6.54574e-22	6.03796e-20
RASGRF2	0.203337	5.5205	6.60835e-22	6.08066e-20
SNX9	0.16749	4.49346	6.67837e-22	6.12996e-20
BRD7	0.145371	6.07569	6.86152e-22	6.28259e-20
TTC9C	0.127881	4.39405	7.20228e-22	6.57843e-20
RNA5SP307	0.337311	-0.856846	7.43586e-22	6.77518e-20
EPPK1	0.377757	3.35058	8.65774e-22	7.86925e-20
ZNF786	0.121291	3.64995	8.78478e-22	7.9653e-20
VPS51P2	0.251434	0.364359	9.83151e-22	8.8776e-20
ZNF56P	0.160589	2.45759	9.83859e-22	8.8776e-20
GDF15	0.871995	-1.40612	9.97989e-22	8.98335e-20
TESK2	0.148923	3.98711	1.0113e-21	9.08127e-20
KIAA0040	0.174941	7.15424	1.15422e-21	1.03397e-19
PRKCA	0.233209	5.78623	1.25189e-21	1.11878e-19
SIGMAR1	0.139105	3.56293	1.29215e-21	1.15199e-19
TRAV3	0.286189	0.820441	1.30557e-21	1.16118e-19
LDB1	0.178998	5.49917	1.34574e-21	1.19406e-19
LEMD2	0.117562	6.47702	1.38337e-21	1.22452e-19
MT-CO1	0.381902	9.02611	1.49997e-21	1.32459e-19
SIRPG	0.251114	2.56617	1.61763e-21	1.42512e-19
PTMAP2	-0.407012	-0.396111	1.65397e-21	1.4537e-19
SMIM29	0.151746	2.96319	1.71159e-21	1.50081e-19
SLC25A25	0.124223	4.33691	1.74475e-21	1.52629e-19
C2orf69	-0.248533	3.77604	1.82958e-21	1.59674e-19
MIR941-5	0.670311	-1.90352	1.94003e-21	1.68919e-19
COQ10A	0.128508	2.72834	2.25245e-21	1.95664e-19
GTF3C5	0.125625	4.68981	2.326e-21	2.01583e-19
EIF4EP2	-0.573749	-1.38168	2.33853e-21	2.02199e-19
FANCE	0.132288	2.45946	2.38355e-21	2.05614e-19
OVGP1	0.246645	1.57546	2.4182e-21	2.08122e-19
FAM3A	0.174403	3.26938	2.4434e-21	2.09806e-19
ABHD4	0.190687	4.5189	2.4621e-21	2.10925e-19
STARD5	0.213702	1.67656	2.4809e-21	2.12048e-19
TRBJ2-6	0.264014	0.662808	2.53671e-21	2.16322e-19
ZNF251	0.11469	3.9847	2.6602e-21	2.26336e-19
UBAC2	0.131115	6.02126	3.02736e-21	2.56988e-19
RRAS	0.265062	0.991338	3.05303e-21	2.58578e-19
POLH	0.124442	4.31472	3.2612e-21	2.75582e-19
FBXL8	0.199842	2.23156	3.39263e-21	2.86041e-19
MT-ND4	0.538875	4.6777	3.41153e-21	2.86984e-19
MIR3188	0.318532	-0.393147	3.69955e-21	3.10512e-19
MAPKAPK3	0.162891	6.73665	3.99698e-21	3.34723e-19
RPL24P7	-0.557104	-1.51478	4.33739e-21	3.62415e-19
RPL7P9	-0.909719	1.03772	4.73636e-21	3.94866e-19
SNORD72	-0.354658	-1.13641	4.98466e-21	4.14639e-19
RBM38-AS1	0.210411	0.809451	5.01673e-21	4.16377e-19
ARSG	0.194815	6.01528	5.30528e-21	4.39348e-19
FBXO42	0.132259	5.73309	5.83587e-21	4.82216e-19
TRAF3IP2	0.200347	2.39972	6.25784e-21	5.1594e-19
RPL7P26	-0.925096	-1.79879	6.59322e-21	5.4239e-19
RNU1-89P	-1.79986	-2.23988	6.62387e-21	5.43712e-19
UBE2S	0.188984	3.65394	6.96025e-21	5.70068e-19
MTND5P26	0.334488	-0.719339	6.98415e-21	5.7077e-19
PTPN9	0.144918	4.66531	7.15997e-21	5.83859e-19
NAXE	0.143851	3.19725	7.18624e-21	5.84722e-19
RNU6ATAC7P	-1.33214	-2.48381	7.2218e-21	5.86335e-19
DPY19L3-DT	0.193611	1.93181	7.63975e-21	6.18919e-19
STRAP	-0.196069	4.1509	7.75409e-21	6.2682e-19
RPL13AP18	-0.951769	-2.29863	7.77828e-21	6.27414e-19
GPR75	0.210284	1.87724	8.09089e-21	6.5122e-19
ATG4D	0.174648	3.57026	8.16881e-21	6.56075e-19
MRPL49	0.119227	4.64006	8.19523e-21	6.56781e-19
HIC2	0.144442	3.81939	8.56416e-21	6.84876e-19
ACTG1	0.173953	9.57898	9.12558e-21	7.2821e-19
POGK	0.113797	5.63202	9.5266e-21	7.58586e-19
ARMC7	0.198822	2.98754	9.61615e-21	7.63745e-19
JUN-DT	0.184972	1.53019	9.63237e-21	7.63745e-19
USP39	0.11246	5.23195	9.88705e-21	7.82274e-19
UBL4A	0.154653	4.59192	1.1883e-20	9.37989e-19
RNVU1-6	-0.711703	-2.0343	1.19055e-20	9.37989e-19
CRYL1	0.122805	3.65962	1.23144e-20	9.68165e-19
CENATAC-DT	0.169126	1.77535	1.30238e-20	1.02178e-18
MIR1207	0.309676	-0.283814	1.30564e-20	1.02219e-18
TP53I13	0.171944	4.44021	1.43992e-20	1.12495e-18
TMEM187	0.164599	2.01134	1.51028e-20	1.17745e-18
TINF2	0.126236	6.16652	1.58862e-20	1.23594e-18
MTATP6P1	0.627068	-0.271909	1.6273e-20	1.2634e-18
RPS15A	-0.476411	7.49817	1.71154e-20	1.32604e-18
RNF144A	0.225248	5.53332	1.74311e-20	1.34769e-18
TMEM102	0.146044	3.3751	1.80972e-20	1.39629e-18
ARRDC2	0.161198	5.8512	2.44779e-20	1.8847e-18
SCFD2	0.131622	4.82556	2.4878e-20	1.91155e-18
ZNF672	0.132806	4.74066	2.49364e-20	1.9121e-18
TRBV20-1	0.267765	2.7287	2.54549e-20	1.94785e-18
RPS27AP5	-0.590533	-1.39188	2.58462e-20	1.97374e-18
WDR55	0.12196	5.4094	2.63863e-20	2.01086e-18
ZNF2	0.0978338	3.046	2.7201e-20	2.06872e-18
NR2C2AP	0.141022	3.0377	2.72618e-20	2.06912e-18
SLC35B1	0.110635	4.18518	2.90089e-20	2.19724e-18
CIDECP1	0.130351	3.01457	3.01489e-20	2.27897e-18
TGFBRAP1	0.139888	4.56342	3.52149e-20	2.65651e-18
NME4	0.240633	3.37442	3.70992e-20	2.793e-18
RFT1	0.126153	4.56655	4.02673e-20	3.0254e-18
CARHSP1	0.155434	5.16261	4.19894e-20	3.14845e-18
RASSF5	0.159519	7.70272	4.35755e-20	3.26081e-18
DIDO1	0.131437	7.30556	4.61035e-20	3.44307e-18
ACOT8	0.116078	4.61492	4.83034e-20	3.60015e-18
AKR1B1	0.127449	3.85299	4.93014e-20	3.6672e-18
RDX	-0.178626	4.39174	4.94584e-20	3.67155e-18
GPN2	0.121891	4.6772	5.19589e-20	3.8495e-18
LTB4R	0.204006	5.74199	5.94819e-20	4.39812e-18
MKNK1	0.203747	6.59933	6.08953e-20	4.49371e-18
SIMC1P1	0.187203	3.78132	6.27793e-20	4.62359e-18
ING5	0.12859	5.36051	6.39798e-20	4.70271e-18
EMP3	-0.197513	6.51132	6.43979e-20	4.72412e-18
HMGN2	0.157086	7.16701	6.59058e-20	4.82037e-18
ADA	0.168164	3.54686	6.59686e-20	4.82037e-18
RNU4-1 /// RNU4-3P /// RNU4-4P /// RNU4-5P /// RNU4-6P /// RNU4-7P /// RNU4-8P	0.258786	-0.408734	6.68292e-20	4.8737e-18
RNU1-30P	-1.70534	-2.38744	6.7108e-20	4.88446e-18
TRAP1	0.15832	4.44543	7.28527e-20	5.29226e-18
TMEM248	0.116693	6.48961	7.37562e-20	5.34747e-18
TCTA	0.141689	4.38674	8.16232e-20	5.90635e-18
TMEM30BP1	0.289462	1.75558	8.18599e-20	5.912e-18
DYNLRB1	0.164487	3.84962	9.07314e-20	6.54003e-18
SRP9P1	-0.486124	-0.775544	9.6453e-20	6.93903e-18
CASTOR1	0.176585	1.05515	9.68321e-20	6.95288e-18
MID2	0.166244	2.49951	1.02352e-19	7.33509e-18
LBHD1	0.174904	3.07684	1.09121e-19	7.80519e-18
ALMS1	0.152526	6.4596	1.09886e-19	7.84487e-18
DESI1	0.16913	4.6493	1.12165e-19	7.99224e-18
JTB	-0.216832	4.38473	1.1499e-19	8.16776e-18
INKA2	0.219519	3.81987	1.15067e-19	8.16776e-18
TM7SF2	0.149062	2.91147	1.20263e-19	8.52035e-18
SLC2A4RG	0.260554	2.74659	1.2395e-19	8.76495e-18
SCARNA1	-0.577959	2.01215	1.3346e-19	9.41312e-18
UNC119	0.164128	5.82063	1.33621e-19	9.41312e-18
VSIG1	0.203945	3.41347	1.47138e-19	1.03458e-17
LRRC37A	0.334915	2.23997	1.48578e-19	1.04273e-17
QRICH1	0.142115	5.85119	1.49671e-19	1.04843e-17
AMER1	0.148656	3.25985	1.50117e-19	1.04958e-17
ABHD8	0.161261	2.26344	1.52154e-19	1.06183e-17
RPL17P6	-0.74144	-0.989447	1.55425e-19	1.08263e-17
DCAKD	0.136578	3.47635	1.60763e-19	1.11772e-17
ITK	0.169326	7.85593	1.62857e-19	1.13018e-17
NOP53	0.22663	7.77335	1.76427e-19	1.22207e-17
MTCO2P11	0.313963	1.58278	1.87675e-19	1.29757e-17
TNFSF13	0.194039	4.15979	1.90127e-19	1.31208e-17
PIK3IP1	0.19124	7.35465	1.9483e-19	1.34206e-17
C8orf33	0.100293	4.33463	1.99311e-19	1.37039e-17
PATZ1	0.150165	4.41308	2.02157e-19	1.3874e-17
RPLP0P6	-0.374576	3.03686	2.03634e-19	1.39497e-17
MIR4441	0.291321	0.067427	2.09231e-19	1.43068e-17
SLC7A6	0.187578	6.28082	2.17472e-19	1.48431e-17
CENPBD2P	0.1824	3.65347	2.42798e-19	1.65413e-17
TRBV29-1	0.311602	1.4858	2.46089e-19	1.6735e-17
RPL36	-0.277932	7.32834	2.53388e-19	1.71999e-17
PPP2R2D	0.120884	6.15677	2.55238e-19	1.7294e-17
ZNF815P	0.174719	4.12223	2.67595e-19	1.80983e-17
VDAC2P5	-0.440302	-1.33775	2.68804e-19	1.81472e-17
SNRPF	-0.253157	3.27926	2.80463e-19	1.89001e-17
NEURL2	0.197444	0.506003	3.01669e-19	2.02924e-17
ZNHIT2	0.158604	2.07134	3.08173e-19	2.06926e-17
PICK1	0.155288	3.36744	3.09146e-19	2.06982e-17
UBE2D4	0.14471	2.36495	3.09368e-19	2.06982e-17
ZXDC	0.160352	6.63699	3.11035e-19	2.07724e-17
KCTD2	0.14087	4.51402	3.2823e-19	2.18816e-17
KRT8P33	0.227609	3.41255	3.30952e-19	2.20237e-17
ZFAT	0.143027	5.14533	3.3523e-19	2.22686e-17
UBE4A	0.137441	7.13045	3.7659e-19	2.49715e-17
CSTF2	0.115462	3.46862	3.93044e-19	2.60163e-17
RFC5	0.0886953	3.42122	4.24952e-19	2.80785e-17
KRT18P15	0.367991	1.21091	4.28092e-19	2.82359e-17
GZMM	0.240295	5.25089	4.34863e-19	2.86318e-17
FKBP5	0.30146	7.11584	4.48908e-19	2.95044e-17
FBXO44	0.186496	3.0521	4.79583e-19	3.1465e-17
XXYLT1	0.166307	3.14724	5.10087e-19	3.34076e-17
AKR7A2	0.132578	3.77529	5.35308e-19	3.49979e-17
MIF4GD	0.13963	2.88592	5.52829e-19	3.60801e-17
CCDC144CP	-0.262706	2.49387	5.56087e-19	3.62293e-17
RAD51AP1	-0.32318	0.792601	5.6267e-19	3.65942e-17
TMEM183BP	-0.368283	-0.0489168	5.76485e-19	3.74273e-17
MED19	0.144504	2.06115	5.78116e-19	3.74679e-17
ING1	0.119287	5.0701	5.99065e-19	3.87582e-17
ZNF839	0.139045	4.13824	6.11939e-19	3.95225e-17
IFITM1	0.273297	6.90458	6.74859e-19	4.35109e-17
FBXL15	0.145337	3.7554	6.8841e-19	4.43079e-17
JMJD4	0.148932	4.37337	6.94261e-19	4.46075e-17
MIR4787	0.430191	-1.92245	7.04955e-19	4.52166e-17
PPP4R2	-0.290256	6.70217	7.14927e-19	4.57774e-17
SNORD3B-2	-0.951938	3.10978	7.33523e-19	4.68876e-17
ENDOG	0.19463	2.12053	7.52546e-19	4.80212e-17
RPL35P5	-0.488118	-0.797294	7.75604e-19	4.94079e-17
SLC25A38	0.160468	4.91562	7.88728e-19	5.01582e-17
EIF3L	0.152848	6.53503	8.39444e-19	5.32926e-17
TENT4A	0.155719	5.00826	8.6251e-19	5.46638e-17
ALYREF	0.170451	4.56394	8.7957e-19	5.56504e-17
ZNF888	-0.234508	3.22364	9.07769e-19	5.73371e-17
ST6GALNAC6	0.208861	3.3679	9.4353e-19	5.94951e-17
RPL19P6	0.199456	0.475761	9.66547e-19	6.08435e-17
SNORA80B	-0.876371	1.5006	1.03631e-18	6.51248e-17
PTDSS1	0.12286	6.21168	1.04335e-18	6.54569e-17
GRAMD2B	0.151566	2.46674	1.05502e-18	6.60781e-17
RPL7P47	-0.824644	-2.12364	1.07998e-18	6.75279e-17
MRPL43	0.103158	4.005	1.0935e-18	6.82587e-17
SPCS3-AS1	0.169069	1.8816	1.10483e-18	6.88507e-17
SCAND2P	0.145781	5.59687	1.15149e-18	7.16382e-17
SNORA72	-0.427967	0.568551	1.2152e-18	7.5476e-17
IRF1	0.171615	9.33091	1.24587e-18	7.72525e-17
WDHD1	-0.216456	2.64931	1.25784e-18	7.78648e-17
ATP5MGP6	0.362201	-1.00146	1.26001e-18	7.78696e-17
TAF9P3	0.287013	-0.568854	1.38781e-18	8.56263e-17
CUBN	0.223012	4.99202	1.40635e-18	8.66267e-17
DLST	0.115956	5.89062	1.52964e-18	9.40651e-17
CSNK1G2P1	0.194455	2.18504	1.74875e-18	1.07362e-16
NELL2	0.257807	6.17787	1.77117e-18	1.0856e-16
NECAP2	0.116385	6.12226	1.86677e-18	1.14232e-16
SNORD3B-1	-0.850817	0.704959	1.87955e-18	1.14825e-16
CSNK1G2	0.178903	6.53666	1.9853e-18	1.21087e-16
MGAT5	0.146973	6.62374	1.99782e-18	1.21651e-16
DTYMK	0.125477	2.72239	2.09818e-18	1.27554e-16
FOXN3-AS1	0.21281	0.433314	2.18679e-18	1.32725e-16
RNF157	0.255188	3.94539	2.26982e-18	1.3754e-16
FSD1L	-0.248482	3.46616	2.27878e-18	1.37859e-16
TYSND1	0.136119	4.57184	2.32981e-18	1.40718e-16
RPL10P6	-0.626106	0.229046	2.41327e-18	1.45523e-16
PHF1	0.185774	4.5348	2.42099e-18	1.45752e-16
ZFAND2A-DT	0.164792	1.24794	2.52022e-18	1.51482e-16
TRBV23-1	0.348649	0.130762	2.53424e-18	1.52024e-16
SCARNA9	-0.394208	3.72252	2.5374e-18	1.52024e-16
MTND2P2	0.365336	-1.20898	2.65335e-18	1.58715e-16
NUDT17	0.153751	1.44231	2.84395e-18	1.69844e-16
ZNF524	0.147374	3.50355	3.07275e-18	1.83215e-16
PEG13	0.249049	3.96285	3.121e-18	1.85794e-16
MAML2	0.151959	5.76698	3.2969e-18	1.95952e-16
LINC01003	0.162939	3.44828	3.32754e-18	1.97459e-16
CTCF-DT	0.186945	1.4554	3.40806e-18	2.01916e-16
ACTR2P2	-0.34565	-0.194222	3.47845e-18	2.05758e-16
SCO2	0.358422	-0.807294	3.51629e-18	2.07667e-16
SRSF2	0.131081	6.74383	3.59095e-18	2.11741e-16
MED24	0.196736	3.81368	3.69929e-18	2.17785e-16
RNVU1-4	0.261771	1.15665	3.80766e-18	2.23811e-16
CIDEB	0.182411	4.50836	3.83488e-18	2.25056e-16
LINC01550	0.214401	5.06845	4.02649e-18	2.35929e-16
GATD1	0.228597	3.60101	4.05523e-18	2.3724e-16
ZNF408	0.103526	3.21469	4.18261e-18	2.44309e-16
RPL29P14	0.169548	2.55978	4.2905e-18	2.50076e-16
UST	0.197448	3.46413	4.29477e-18	2.50076e-16
PDE4DIPP2	0.184029	5.28171	4.34653e-18	2.52696e-16
ARF6	-0.159848	7.24873	4.53076e-18	2.62996e-16
EOLA2	0.117999	3.56005	4.71086e-18	2.73025e-16
BZW1P2	-0.527441	-0.0834162	4.83395e-18	2.79724e-16
ZSWIM3	0.145538	1.80209	4.94829e-18	2.85896e-16
DNAJB6P1	-0.332498	0.136732	5.03185e-18	2.90274e-16
ERP27	0.187382	4.16723	5.04851e-18	2.90785e-16
SMG1P1	0.20863	5.2679	5.4096e-18	3.11102e-16
LINC03072	0.140306	3.85939	5.51208e-18	3.16507e-16
SCARNA14	-0.607797	-1.76444	5.58546e-18	3.20227e-16
RPSAP19	-0.426575	0.524822	5.65066e-18	3.23468e-16
KCMF1	0.112541	6.3544	5.84495e-18	3.34077e-16
GATC	0.130102	4.48368	5.86267e-18	3.34576e-16
SLC30A1	-0.320873	5.36683	5.87759e-18	3.34915e-16
S100A4	-0.212841	8.56726	5.91405e-18	3.36478e-16
CCR7	0.267255	6.2286	5.9875e-18	3.39949e-16
QTRT1	0.146193	2.98604	5.99331e-18	3.39949e-16
EEF1B2P3	-0.610333	-0.523464	6.10703e-18	3.45873e-16
WDR5	0.113719	3.67936	6.1251e-18	3.4637e-16
EXOSC10	0.105269	5.2843	6.15474e-18	3.47519e-16
TFAP2E-AS1	0.168675	2.74787	6.18664e-18	3.48792e-16
ITPKB	0.186612	6.98559	6.24292e-18	3.51433e-16
ASXL1	0.14555	6.43338	6.27025e-18	3.52439e-16
VPS26B	0.143066	5.56734	6.3277e-18	3.55133e-16
ZCCHC3	0.122458	5.27124	6.4862e-18	3.63481e-16
NFKBIA	0.159735	6.565	6.57004e-18	3.67626e-16
UPP1	0.156511	5.42575	6.71771e-18	3.75325e-16
SUMF1	0.118847	5.69533	6.75306e-18	3.76736e-16
SNORD105B	-0.76915	-1.34262	6.88534e-18	3.83541e-16
FXN	0.134461	3.53292	7.37421e-18	4.1016e-16
B4GALT6	-0.2685	1.94565	7.56302e-18	4.20035e-16
LINC00954	0.210991	3.8081	7.75705e-18	4.3017e-16
PIK3IP1-DT	0.23213	0.623844	7.79851e-18	4.31827e-16
PYGO2-AS1	0.18361	0.923354	8.089e-18	4.47247e-16
DEXI	0.11344	4.28048	8.26267e-18	4.56173e-16
PHF19	0.169863	4.73027	8.28546e-18	4.56754e-16
PRDM8	0.166619	3.73488	8.35837e-18	4.60093e-16
CTNS	0.137208	3.29169	8.84928e-18	4.86397e-16
ATXN7L3-AS1	0.214575	0.0419364	9.58611e-18	5.26121e-16
ZBTB2	0.143881	3.87265	1.00041e-17	5.48252e-16
SNX17	0.123104	6.35722	1.03827e-17	5.67996e-16
WHAMM	0.109666	5.11826	1.03948e-17	5.67996e-16
BAD	0.15057	3.70732	1.04402e-17	5.69642e-16
NSMCE4A	0.123991	5.06588	1.07672e-17	5.86626e-16
NSMCE3	0.132248	4.11489	1.09163e-17	5.9388e-16
ACTR6	-0.27396	4.07373	1.11857e-17	6.07645e-16
PHB2	0.147305	5.79916	1.12385e-17	6.09627e-16
SNORD15B	-0.793057	3.69903	1.13874e-17	6.16805e-16
LEF1-AS1	0.295289	3.18199	1.14723e-17	6.20506e-16
SCARNA8	-0.433982	-0.613641	1.15491e-17	6.23175e-16
LITATS1	0.138002	1.7695	1.15551e-17	6.23175e-16
ARL8A	0.192354	3.93127	1.18193e-17	6.36499e-16
CSNK2A3	-0.490251	-1.38975	1.21571e-17	6.53745e-16
RPS7P1	-0.682417	0.0776821	1.29908e-17	6.97572e-16
ERCC3	0.105312	5.40112	1.31229e-17	7.03651e-16
RPL4P4	-0.36994	2.46126	1.35632e-17	7.26214e-16
NFE2L2	0.154122	6.46278	1.40541e-17	7.5142e-16
CBY1	0.106739	3.06405	1.43938e-17	7.68482e-16
DDX19A	0.106178	3.4996	1.46339e-17	7.8018e-16
RPS21-DT	0.164293	1.36682	1.48627e-17	7.91246e-16
RPS27P19	-0.247715	1.81849	1.53829e-17	8.17771e-16
PUSL1	0.170988	1.85735	1.54652e-17	8.20977e-16
ETFB	-0.116942	3.50754	1.55336e-17	8.23435e-16
LINC01278	0.153225	2.72158	1.58585e-17	8.39463e-16
SNORA60	-0.486655	-0.364912	1.59046e-17	8.40711e-16
MON1A	0.123428	2.59265	1.72438e-17	9.1021e-16
SH2B3	0.203027	6.52413	1.76618e-17	9.30953e-16
TRMU	0.112148	5.05048	1.81863e-17	9.57246e-16
PMS2CL	0.0993512	4.27412	1.90946e-17	1.00364e-15
SPIN4	-0.171018	2.56345	1.94974e-17	1.02337e-15
SECTM1	0.267704	5.96195	2.04285e-17	1.07073e-15
NF2	0.148595	4.91637	2.09327e-17	1.09561e-15
IRF2BP1	0.136822	3.93693	2.12747e-17	1.11195e-15
GNPTG	0.117951	4.89076	2.15611e-17	1.12534e-15
RAB24	0.187012	4.81141	2.20949e-17	1.15159e-15
UBL7	0.189031	5.21026	2.24557e-17	1.16876e-15
RN7SL33P	-1.22014	-1.7736	2.5021e-17	1.30046e-15
ERBIN-DT	0.19977	1.17801	2.53972e-17	1.31818e-15
NIPAL3	0.131058	6.31061	2.70617e-17	1.40244e-15
PRKCQ	0.151487	5.78149	2.70959e-17	1.40244e-15
SUMO1P3	-0.458601	-1.1305	2.74815e-17	1.42042e-15
CDK16	0.16661	3.92105	2.78427e-17	1.4371e-15
BSCL2	0.129792	1.96541	2.82987e-17	1.45862e-15
HMOX2	0.117684	5.027	2.83629e-17	1.45991e-15
CLDN12	-0.209334	1.31954	2.959e-17	1.52097e-15
ZNF71	0.0968393	3.38945	2.97482e-17	1.52699e-15
MDH2	0.134864	4.13409	3.14418e-17	1.61171e-15
CERK	0.121993	7.21709	3.15952e-17	1.61735e-15
SCOC	-0.348458	3.50106	3.16725e-17	1.61908e-15
PPME1	0.0924557	3.83902	3.30122e-17	1.68298e-15
TMED2-DT	0.14765	2.87348	3.30129e-17	1.68298e-15
PECR	0.114075	4.24334	3.43855e-17	1.74874e-15
RAB33B-AS1	0.133291	4.91337	3.43966e-17	1.74874e-15
ERVFRD-3	0.337268	-1.62445	3.59591e-17	1.82568e-15
RPL24P2	-0.7346	-2.15977	3.94425e-17	1.99981e-15
SNORA22	-0.699827	2.62158	3.97773e-17	2.01405e-15
GCATP1	0.153338	2.48881	4.08055e-17	2.06331e-15
RNF130	0.148143	7.82262	4.09429e-17	2.06745e-15
SLC35B2	0.12274	3.96966	4.19646e-17	2.11617e-15
CTPS1	0.121875	4.651	4.29949e-17	2.1652e-15
RFWD3	0.116407	5.05378	4.56633e-17	2.29648e-15
FRAT1	0.181743	6.54252	4.59076e-17	2.30565e-15
TMEM230	0.134833	5.46277	4.65711e-17	2.33583e-15
RELB	0.190149	3.63258	4.83793e-17	2.42326e-15
MT-ND3	0.394549	4.13693	4.88501e-17	2.44356e-15
MBD3	0.133005	4.65684	4.89481e-17	2.44517e-15
MGAT1	0.139652	7.38077	4.98424e-17	2.48651e-15
ING2-DT	0.179988	0.872037	5.06987e-17	2.52585e-15
ZNF765	-0.296549	4.17529	5.09891e-17	2.53693e-15
UBE2V1	0.153945	4.71317	5.19774e-17	2.58265e-15
ACBD6	0.111668	5.54828	5.21e-17	2.5853e-15
FBXL12	0.118391	3.40832	5.43462e-17	2.69183e-15
NGRN	0.120094	4.80544	5.43914e-17	2.69183e-15
C6orf136	0.164426	2.18424	5.74361e-17	2.83875e-15
CCL5	0.285857	7.40181	5.75404e-17	2.84013e-15
SRM	0.250996	1.51373	5.79403e-17	2.85281e-15
MIR1244-3	-0.801553	-2.58058	5.79504e-17	2.85281e-15
PHLPP1	0.144728	4.34706	5.83121e-17	2.86683e-15
TBC1D20	0.128966	5.59227	5.99944e-17	2.94565e-15
CYFIP2	0.156625	8.11424	6.31727e-17	3.09762e-15
RPL37A	-0.267649	8.77941	6.47964e-17	3.17077e-15
ZNF70	0.195914	2.90042	6.49096e-17	3.17077e-15
UGDH-AS1	0.153548	1.17408	6.49196e-17	3.17077e-15
MTCO1P12	0.588367	2.23923	6.60094e-17	3.21977e-15
DCLRE1CP1	-0.968345	-2.32065	6.68236e-17	3.25523e-15
OR7E115P	-1.34703	-3.03775	6.83912e-17	3.32724e-15
FBXW8	0.169095	3.69467	6.88134e-17	3.34342e-15
CYB5R1	0.143761	4.80318	6.96085e-17	3.37764e-15
POLR3K	0.12	2.83182	6.98301e-17	3.38399e-15
INPP5A	0.143801	5.17704	7.01524e-17	3.3952e-15
PDSS1	0.137226	2.49057	7.19948e-17	3.47984e-15
PGAP2	0.162365	2.66102	7.3686e-17	3.55697e-15
RPS28P5	0.342053	0.279955	7.7834e-17	3.75235e-15
ZNF446	0.184043	2.21356	8.01727e-17	3.8601e-15
PPP1R14B	0.178398	2.83692	8.12099e-17	3.90499e-15
MT-ATP6	0.452507	3.17312	8.21288e-17	3.94409e-15
NUDT6	-0.1878	2.06489	8.50951e-17	4.08128e-15
HECTD2	-0.287874	2.25874	8.55012e-17	4.09549e-15
RN7SKP184	0.344334	0.463365	8.84898e-17	4.2332e-15
TSEN34	0.159805	6.2904	9.00956e-17	4.30449e-15
TMEM179B	0.149659	3.29292	9.21093e-17	4.39506e-15
TPGS2	0.156731	5.96808	9.31734e-17	4.44015e-15
RNF216	0.13258	6.35062	9.44372e-17	4.49463e-15
THEM4	0.18815	4.11985	9.47998e-17	4.50613e-15
MT-ND1	0.490875	3.70329	9.53466e-17	4.52635e-15
MYD88	0.230662	6.12275	9.61827e-17	4.56024e-15
MPV17	0.10301	4.73551	9.84865e-17	4.66353e-15
RPS10P9	-0.821828	-2.7607	1.00061e-16	4.73208e-15
NFATC3	0.136115	6.98073	1.00895e-16	4.76547e-15
RHOA-IT1	0.233284	1.75568	1.05435e-16	4.97358e-15
LRRC61	0.177092	2.17959	1.06163e-16	5.00161e-15
JPT2	0.0964965	4.24019	1.06553e-16	5.01363e-15
ERI2	-0.162286	2.69006	1.26004e-16	5.92137e-15
PSPC1P1	-0.458395	-1.43519	1.27167e-16	5.96854e-15
RN7SKP56	0.228894	-0.376394	1.27811e-16	5.9912e-15
RNU1-43P	-1.64987	-2.58768	1.33167e-16	6.23444e-15
ZSCAN22	0.121382	2.38165	1.40974e-16	6.59163e-15
RPL10AP6	-0.394493	0.785132	1.45588e-16	6.79886e-15
UBALD2	0.194576	5.12988	1.45934e-16	6.80647e-15
KIAA1191	0.124747	5.29551	1.52736e-16	7.11482e-15
MAML1	0.215948	5.88874	1.54193e-16	7.17374e-15
JDP2	0.159875	5.20132	1.56786e-16	7.28055e-15
CNN2	0.25202	7.36672	1.5688e-16	7.28055e-15
WASHC2A	0.137588	5.41707	1.58787e-16	7.3599e-15
CAPS	0.174344	3.76237	1.59659e-16	7.39113e-15
MIR4698	0.378596	-1.20045	1.60187e-16	7.40636e-15
ATG9A	0.190418	4.09958	1.61053e-16	7.43718e-15
RAP2C-AS1	0.160155	1.17513	1.61699e-16	7.45776e-15
POLR2M	-0.238003	4.49003	1.64952e-16	7.59838e-15
C1orf162	0.149735	5.51239	1.65938e-16	7.63439e-15
THBS4-AS1	0.211917	2.77399	1.67879e-16	7.71418e-15
ZNF574	0.15674	2.85209	1.73684e-16	7.97108e-15
EP300	0.163783	7.68086	1.76641e-16	8.09682e-15
MT-TT	-0.459548	1.02401	1.82381e-16	8.34965e-15
ATF4	0.146258	6.54768	1.83369e-16	8.38459e-15
SUZ12	-0.244964	5.41174	1.94997e-16	8.90532e-15
OGFRP1	0.202296	0.161669	1.97394e-16	9.00376e-15
VKORC1	-0.150213	2.48582	1.99627e-16	9.09451e-15
HABP4	0.131134	4.01398	2.14126e-16	9.74311e-15
GPX7	0.150638	2.3589	2.17534e-16	9.88613e-15
ZNF789	0.101739	4.14654	2.34862e-16	1.06606e-14
SON	0.113184	9.00093	2.35749e-16	1.06879e-14
UBE3C	0.107988	6.84892	2.40009e-16	1.08678e-14
METTL26	0.182857	2.27448	2.50893e-16	1.13468e-14
LINC01128	0.119967	4.26789	2.51979e-16	1.13821e-14
RTEL1P1	0.290361	4.49012	2.5334e-16	1.14298e-14
GLIPR1-AS1	0.193565	0.456636	2.54776e-16	1.14806e-14
ERVK13-1	0.152071	6.5743	2.5514e-16	1.14832e-14
DNAJC30	0.176337	1.76873	2.58964e-16	1.16412e-14
MRPL54	-0.202187	3.81883	2.60529e-16	1.16974e-14
EARS2	0.0876126	3.7947	2.73105e-16	1.22473e-14
RNF4	0.11873	6.32416	2.83826e-16	1.27128e-14
TMEM115	0.13659	3.54608	2.94287e-16	1.31656e-14
RPL29P26	-0.445153	-1.22487	2.984e-16	1.33335e-14
NME1	-0.238758	1.87854	2.99063e-16	1.33471e-14
SET	-0.192675	7.52295	3.0184e-16	1.3455e-14
C12orf43	0.095384	3.23979	3.02693e-16	1.34769e-14
ALG3	0.114633	2.69628	3.03776e-16	1.35089e-14
TMEM45B	0.267812	3.13397	3.04138e-16	1.35089e-14
ESRRA	0.125848	5.79102	3.05228e-16	1.35412e-14
EIF4BP6	-0.240076	1.74083	3.11715e-16	1.38126e-14
HMOX1	0.216402	3.47787	3.16842e-16	1.40231e-14
PPP2R5E	-0.14893	5.54189	3.17758e-16	1.40402e-14
SCARNA5	-0.544316	8.53418	3.17982e-16	1.40402e-14
VPS4A	0.0981542	4.19283	3.32502e-16	1.46639e-14
ICAM2	0.123448	5.30643	3.34214e-16	1.4722e-14
CORO2A	0.178856	3.3034	3.35194e-16	1.47478e-14
MIR4767	0.350104	-1.76795	3.49537e-16	1.53607e-14
UBE2J2	0.116978	5.59035	3.56953e-16	1.56681e-14
PEPD	0.119773	4.59165	3.59804e-16	1.57747e-14
SDHAF1	0.159687	3.42379	3.6293e-16	1.5893e-14
ZNRD2-DT	0.158223	1.53425	3.66242e-16	1.60192e-14
TGIF2P1	0.17048	1.2175	3.79083e-16	1.65614e-14
GOT2	0.128407	3.80132	4.04031e-16	1.76307e-14
IGLC7	-0.677176	-1.28484	4.11326e-16	1.7928e-14
NCF1B	0.208702	6.1304	4.13166e-16	1.79872e-14
TMEM11	0.122812	3.13413	4.22472e-16	1.83709e-14
UGGT2	-0.233074	3.40638	4.22978e-16	1.83714e-14
ZNF764	0.204442	2.23815	4.3499e-16	1.88712e-14
HPS1	0.215985	6.07576	4.40878e-16	1.90967e-14
SCARNA6	-0.470869	7.27816	4.41214e-16	1.90967e-14
PITPNC1	0.109174	5.97543	4.70556e-16	2.03431e-14
EIF2B4	0.0975868	3.86	4.74284e-16	2.04805e-14
RPS3AP26	-0.68602	1.23419	4.76716e-16	2.05617e-14
MIR5690	0.364043	0.795519	4.87461e-16	2.10009e-14
TMEM177	0.137859	2.35383	5.2141e-16	2.24375e-14
MT-ND5	0.498001	3.94431	5.35865e-16	2.30329e-14
TYW1B	0.129702	3.42655	5.68732e-16	2.44175e-14
C1DP5	-0.308418	0.0759031	5.74635e-16	2.46425e-14
EMC1-AS1	0.13303	1.01289	5.82911e-16	2.49687e-14
GPATCH3	0.103893	3.21174	5.92876e-16	2.53374e-14
ZXDB	0.124086	3.26617	5.92878e-16	2.53374e-14
FLNB	0.175489	5.60444	5.93866e-16	2.53505e-14
MORN2	-0.323792	-0.649497	6.00917e-16	2.56222e-14
LINC01624	0.185203	1.96837	6.01714e-16	2.56268e-14
ANK3	0.208772	6.33111	6.2377e-16	2.65359e-14
TPT1P6	-0.548317	-1.69749	6.4693e-16	2.74897e-14
USP30	0.094501	3.37492	6.67235e-16	2.83202e-14
BTF3L4P2	-0.557079	-2.25353	6.84643e-16	2.90261e-14
KBTBD8	-0.334432	3.57083	7.08571e-16	3.00064e-14
HAPLN3	0.192563	4.418	7.17324e-16	3.03425e-14
PHKA2	0.159843	5.6109	7.21824e-16	3.04983e-14
ATP5F1E	-0.30648	6.61061	7.25882e-16	3.0635e-14
ATP5PO	-0.201728	3.89577	7.29712e-16	3.07618e-14
ZNF48	0.129907	2.41592	7.53684e-16	3.17297e-14
TRBV10-2	0.539026	-1.26583	7.54374e-16	3.17297e-14
ZNF169	0.110387	4.56378	7.56688e-16	3.17911e-14
UXS1	0.120037	5.64978	7.81529e-16	3.27978e-14
BAX	0.132547	4.85728	7.98009e-16	3.34517e-14
NANOGP5	0.206045	1.68238	8.29307e-16	3.47247e-14
GAS2L3	-0.247698	1.61054	8.38772e-16	3.50816e-14
LEAP2	0.127437	1.68546	8.51566e-16	3.55767e-14
CCDC86	0.182682	1.77645	8.55874e-16	3.57167e-14
PCYOX1L	0.135999	4.14961	8.70168e-16	3.62726e-14
TRAPPC10	0.141554	6.85081	9.01814e-16	3.75497e-14
ACOT2	0.130135	2.33009	9.0622e-16	3.76911e-14
H2BC18	0.190521	6.69793	9.34487e-16	3.88234e-14
LPCAT3	0.161452	4.23251	9.50454e-16	3.94428e-14
LSP1	-0.215844	8.25195	9.8366e-16	4.07754e-14
SGO2	-0.318547	1.89497	9.99003e-16	4.13654e-14
RNU6-638P	0.176583	2.99023	1.00358e-15	4.15088e-14
GLTP	0.123734	5.17942	1.02607e-15	4.2392e-14
THEM6	0.132141	3.08882	1.04384e-15	4.30784e-14
PIGU	0.103281	3.18953	1.05756e-15	4.35964e-14
ZCCHC10	-0.286304	2.85503	1.0906e-15	4.48855e-14
SNORD46	-0.419328	-0.377924	1.09124e-15	4.48855e-14
FHL3	0.264993	3.85399	1.16232e-15	4.77562e-14
SH3BP5-AS1	0.177877	4.93726	1.18463e-15	4.86195e-14
FCGR2A	0.183829	9.4358	1.20166e-15	4.92642e-14
TRIM8-DT	0.196108	2.46773	1.24318e-15	5.09104e-14
BTD	0.105847	4.23669	1.26387e-15	5.17009e-14
RPL39	-0.539145	6.0682	1.27923e-15	5.22715e-14
HDHD3	0.157812	2.50431	1.29506e-15	5.28607e-14
TRBV18	0.247391	1.32947	1.32453e-15	5.40042e-14
F8A3	0.363977	-1.82885	1.33143e-15	5.42262e-14
SKAP1	0.172218	4.90841	1.36804e-15	5.56566e-14
RNU6-759P	0.185223	1.12616	1.37359e-15	5.58216e-14
BRD10	0.117795	6.9963	1.39396e-15	5.65875e-14
CDK2AP1	0.169885	3.47871	1.44256e-15	5.84965e-14
PHF20	0.105489	6.71064	1.52215e-15	6.1657e-14
ZNF611	-0.120682	5.20095	1.53098e-15	6.19472e-14
C22orf39	0.0950983	4.83281	1.58359e-15	6.40067e-14
TOP3B	0.138622	4.81636	1.61057e-15	6.50266e-14
TAS2R3	0.213372	2.37819	1.65514e-15	6.67538e-14
POLR3D	0.134422	3.91522	1.67298e-15	6.74003e-14
PRDX2P3	0.239417	1.77476	1.70642e-15	6.86719e-14
PPP1CB	-0.264019	8.20659	1.70823e-15	6.86719e-14
RNU5D-1	-0.644784	-1.61552	1.73214e-15	6.9558e-14
KDM2B-DT	0.178195	0.928581	1.74229e-15	6.98904e-14
MCUR1	0.11387	3.92718	1.78045e-15	7.13444e-14
MIR5692C2	0.197739	0.939458	1.80604e-15	7.22922e-14
C2orf68	0.104483	6.07466	1.82601e-15	7.30129e-14
SRXN1	0.282343	4.57777	1.94195e-15	7.75655e-14
MAP3K3	0.194887	6.86788	1.95307e-15	7.79104e-14
WRAP73	0.133267	4.40431	1.95476e-15	7.79104e-14
DDX28	0.115188	3.61647	1.98929e-15	7.92019e-14
DOCK9	0.145264	6.28569	2.09997e-15	8.3519e-14
UBIAD1	0.106258	4.19912	2.16983e-15	8.62054e-14
TUBG1	0.162092	1.54882	2.24732e-15	8.91891e-14
NCAPG	-0.434296	1.53278	2.27e-15	8.99934e-14
RPL23AP42	-0.362088	2.88129	2.28296e-15	9.04112e-14
PLIN2	0.151313	4.85851	2.35716e-15	9.32503e-14
DPAGT1	0.145317	2.62889	2.36766e-15	9.35664e-14
TRMT61A	0.127776	2.9966	2.41699e-15	9.54148e-14
RPL35	-0.370832	6.86076	2.42672e-15	9.56976e-14
THBD	0.249406	5.01711	2.43842e-15	9.60571e-14
CDK2	0.10811	2.9406	2.52923e-15	9.95294e-14
ATRIP	0.103742	3.04109	2.58725e-15	1.01705e-13
ZNF525	-0.304404	4.14547	2.59776e-15	1.02011e-13
NPC1	0.164733	5.93814	2.65839e-15	1.04282e-13
NIT2	0.10261	4.59968	2.67377e-15	1.04775e-13
RNA5-8SN1	1.40491	-2.41097	2.71363e-15	1.06225e-13
TSHZ2	0.274903	4.14548	2.73597e-15	1.06987e-13
GPATCH8	0.111267	6.57128	2.73978e-15	1.07024e-13
GTF2I	0.137695	5.07031	2.77864e-15	1.08359e-13
RAP1BL	-0.430814	0.739536	2.77979e-15	1.08359e-13
TIMM50	0.0950251	3.65555	2.85237e-15	1.11073e-13
MKRN2	0.095541	4.73758	2.85541e-15	1.11075e-13
SLC39A12	-1.15105	-1.52188	2.87966e-15	1.11901e-13
VTI1A	0.122816	6.57167	2.96741e-15	1.15191e-13
TMEM223	0.139665	3.11367	2.98376e-15	1.15705e-13
CSNK1E	0.164996	3.45466	3.0856e-15	1.19506e-13
DGCR6L	0.131965	3.7368	3.08819e-15	1.19506e-13
MSANTD2	0.109223	4.49005	3.13713e-15	1.21274e-13
AZIN1	-0.167098	7.14906	3.16041e-15	1.22048e-13
LUC7L	0.133774	5.67684	3.21871e-15	1.2417e-13
MT-TI	-0.526362	-1.36867	3.35156e-15	1.29162e-13
MIR191	0.30983	-1.59779	3.39774e-15	1.30806e-13
C2CD3	0.124019	5.71273	3.41038e-15	1.31157e-13
DYNC2LI1	-0.20389	1.78514	3.53738e-15	1.35901e-13
BBLN	0.145437	3.40556	3.6969e-15	1.41883e-13
MRPS18A	0.115085	3.52626	3.76133e-15	1.44208e-13
MPST	0.152514	4.03492	3.78323e-15	1.44882e-13
CCDC142	0.117126	5.36644	3.7867e-15	1.44882e-13
VWA8-AS1	-0.801739	-1.61829	3.80279e-15	1.45349e-13
ZNF768	0.136108	2.73036	3.84732e-15	1.469e-13
RAD50	0.114345	2.45929	3.94356e-15	1.50421e-13
PDCD4-AS1	0.18903	2.14935	4.05856e-15	1.54649e-13
NCBP2AS2	0.162262	3.25603	4.31436e-15	1.64228e-13
RAB33A	0.161542	1.43052	4.33143e-15	1.64709e-13
C10orf95-AS1	0.118905	4.7725	4.43663e-15	1.68538e-13
PFKFB4	0.187099	6.41257	4.47351e-15	1.69765e-13
SHLD2P1	-0.421257	-0.87957	4.497e-15	1.70484e-13
RPL10P19	0.241989	2.10193	4.50863e-15	1.70751e-13
KIF20B	-0.305422	3.90635	4.67747e-15	1.76965e-13
ATP5MJ	-0.251682	3.88614	4.69373e-15	1.774e-13
SKIL	-0.228095	5.88077	4.83391e-15	1.82513e-13
YTHDF1	0.0941165	4.85929	4.89596e-15	1.84632e-13
RAC1	0.141769	6.73301	4.89994e-15	1.84632e-13
TARS3	0.114068	4.96964	4.91726e-15	1.85098e-13
SNORA11	-0.427508	-0.80928	4.99521e-15	1.87842e-13
GIMAP1	0.138882	6.46813	5.11543e-15	1.92083e-13
SEPHS2	0.136967	4.36423	5.11829e-15	1.92083e-13
LINC01191	0.208946	0.96812	5.1416e-15	1.92764e-13
UBC	0.165262	8.73303	5.17212e-15	1.93685e-13
SLAIN1	0.133212	4.4652	5.17658e-15	1.93685e-13
TLR5	0.234211	5.2496	5.19106e-15	1.94032e-13
HNRNPAB	0.134278	5.4727	5.27409e-15	1.96938e-13
MT-CYB	0.434589	4.53172	5.39198e-15	2.01139e-13
SLC12A6	0.149819	8.62715	5.44931e-15	2.03074e-13
ZSWIM6	0.125402	6.38401	5.67936e-15	2.11436e-13
TRIM28	0.19216	5.05848	5.80233e-15	2.15798e-13
ALDOA	0.134923	3.19744	5.84134e-15	2.17032e-13
CLK2	0.12926	5.07099	5.87335e-15	2.18004e-13
RERE-AS1	0.196585	2.0874	5.99233e-15	2.22199e-13
RBM27	-0.186421	4.99762	6.19182e-15	2.29368e-13
IDH3G	0.121083	4.4718	6.22974e-15	2.30544e-13
BORCS5	0.176716	4.43473	6.32918e-15	2.33991e-13
FAM153A	0.316548	3.78661	6.45375e-15	2.3836e-13
COMMD8	-0.39607	3.38197	6.53704e-15	2.41197e-13
ZBTB39	0.113333	3.82962	6.55605e-15	2.41659e-13
MLF2	0.143454	5.52263	6.64101e-15	2.44549e-13
EVI2A	-0.503067	5.96406	6.94176e-15	2.55372e-13
LINC02352	0.133152	3.07278	6.95308e-15	2.55536e-13
ZNF275	0.158368	4.34692	7.14266e-15	2.62245e-13
AP1AR-DT	-0.296755	0.148767	7.16748e-15	2.62897e-13
BANF1	0.205885	2.12738	7.22967e-15	2.64917e-13
PCIF1	0.154078	5.12468	7.54225e-15	2.761e-13
ACTR1A	0.122737	5.74688	7.78752e-15	2.84798e-13
C1orf174	0.0932448	4.37038	7.84448e-15	2.866e-13
RPS3AP20	-0.66209	-1.49821	7.86831e-15	2.86922e-13
POLR3A	0.0976518	4.91281	7.86868e-15	2.86922e-13
DROSHA	0.116447	5.11982	8.09699e-15	2.94958e-13
BCL3	0.295594	3.91052	8.16598e-15	2.97181e-13
FYN	0.145842	8.05799	8.18949e-15	2.97746e-13
IFNG	-0.412239	0.409059	8.34378e-15	3.0306e-13
RNU6-652P	-0.287139	0.394414	8.45949e-15	3.06963e-13
TRAJ35	0.191475	1.51124	8.6152e-15	3.12309e-13
H2AC13	0.281101	5.06839	8.77626e-15	3.17731e-13
UTP4	0.0971282	3.48775	8.7818e-15	3.17731e-13
NOP56	0.112351	5.59365	8.8206e-15	3.18825e-13
ADAM15	0.195332	3.97431	9.30465e-15	3.35973e-13
TMEM106C	0.11974	3.44063	9.31306e-15	3.35973e-13
SLC7A6OS	0.0924037	5.54605	9.3444e-15	3.36778e-13
NAMPTP1	-0.358905	3.86285	9.51241e-15	3.42502e-13
LINC00623	0.198321	3.75108	9.66085e-15	3.47511e-13
PCID2	0.106189	5.76672	9.78624e-15	3.51682e-13
ENOSF1	0.190553	5.11365	9.95365e-15	3.57353e-13
FARS2	0.110969	4.63517	1.01973e-14	3.65749e-13
H1-2	0.204131	7.84468	1.05855e-14	3.79307e-13
STK35	0.163756	4.95996	1.10984e-14	3.97305e-13
ACTG1P14	0.256974	0.686412	1.11646e-14	3.99288e-13
LRRC37A3	0.298535	3.54158	1.12725e-14	4.0276e-13
DCUN1D1	-0.248451	7.29682	1.13616e-14	4.05556e-13
UBLCP1	-0.198138	5.06218	1.15729e-14	4.12704e-13
KPRP	-1.25321	-1.90074	1.16716e-14	4.15825e-13
KANTR	0.133419	5.01535	1.22249e-14	4.35121e-13
PAN2	0.150027	4.98244	1.26317e-14	4.49172e-13
ZNF74	0.126387	3.10594	1.35804e-14	4.82291e-13
ZNF567-DT	0.110051	2.54552	1.35889e-14	4.82291e-13
ZNF599	0.111994	2.55997	1.36373e-14	4.83548e-13
MTCO3P23	0.267448	3.17702	1.36994e-14	4.85286e-13
BIN3	0.13502	5.58786	1.37976e-14	4.88303e-13
LACC1	-0.220628	2.42576	1.38893e-14	4.9108e-13
NCOR1	0.128501	7.79536	1.3968e-14	4.93396e-13
MIR4729	0.256731	-0.499843	1.40769e-14	4.96769e-13
LITAF	0.184956	9.04159	1.41811e-14	4.99974e-13
ELOA	0.108801	4.45586	1.4334e-14	5.04888e-13
PRRC2C	0.135771	8.42248	1.47703e-14	5.19766e-13
GAPDHP62	0.193163	-0.310758	1.56329e-14	5.49601e-13
PDE4DIPP6	0.137088	2.03582	1.57075e-14	5.51701e-13
RPS2	0.164074	9.30176	1.60016e-14	5.61503e-13
ATP6V1E2	0.119436	2.82882	1.61137e-14	5.64904e-13
TRBV19	0.230451	1.72963	1.62784e-14	5.70141e-13
PSPHP1	-0.873071	-1.01324	1.65639e-14	5.79595e-13
COPZ1	0.113205	5.07302	1.69503e-14	5.92562e-13
RRAGA	0.119966	4.28082	1.70425e-14	5.95226e-13
HNRNPCP2	-0.255136	2.27455	1.72281e-14	6.01144e-13
NFRKB	0.141524	5.10029	1.74953e-14	6.09897e-13
AP5S1	0.128084	3.03001	1.77121e-14	6.16876e-13
FKBP15	0.122101	7.16962	1.80121e-14	6.26741e-13
MIR3142	0.397865	-2.12849	1.89631e-14	6.59215e-13
TMEM129	0.166312	3.56097	2.01104e-14	6.98449e-13
RNVU1-30	0.164968	0.853353	2.01548e-14	6.99337e-13
RPS15AP11	-0.530576	-2.1061	2.025e-14	7.01989e-13
PTGIR	0.201173	2.69153	2.09406e-14	7.25254e-13
RASGRP2	0.137705	7.64206	2.10737e-14	7.29185e-13
TRRAP	0.189523	6.99751	2.11504e-14	7.31161e-13
COMMD6	-0.45109	3.24136	2.14488e-14	7.40787e-13
MT-CO2	0.387597	5.24515	2.19785e-14	7.5838e-13
VPREB1	-0.964649	-2.36827	2.21862e-14	7.64252e-13
IGF1R	0.204671	7.30336	2.21897e-14	7.64252e-13
C1orf56	0.190959	0.311539	2.26242e-14	7.78497e-13
SNORA12	-0.515839	4.7428	2.28047e-14	7.83662e-13
INTS9	0.0880984	4.02858	2.28163e-14	7.83662e-13
PRDM16-DT	-1.12897	0.0285194	2.30528e-14	7.91054e-13
NIPA2	0.107794	5.61743	2.31976e-14	7.95291e-13
ZDHHC5	0.0997528	6.12805	2.32223e-14	7.95406e-13
LINC02863	0.189024	5.84617	2.32511e-14	7.95661e-13
INO80C	0.112077	2.88652	2.33323e-14	7.97706e-13
C18orf54	-0.20673	2.69512	2.40878e-14	8.22784e-13
GPC4	-0.644046	-0.448295	2.41218e-14	8.23191e-13
MANBAL	0.120012	3.71462	2.42558e-14	8.26336e-13
DEF6	0.119693	7.07933	2.42583e-14	8.26336e-13
STK24	0.110166	7.07288	2.49647e-14	8.4962e-13
KCTD12	-0.195074	6.86773	2.50184e-14	8.50671e-13
RPL34P27	-0.996654	-2.62468	2.54303e-14	8.6389e-13
NDUFV1	0.108815	5.17921	2.61091e-14	8.86139e-13
FTL	0.209542	10.7063	2.62329e-14	8.89533e-13
PABPC4	0.114852	5.59657	2.63949e-14	8.94212e-13
ACAD9	0.113797	5.19343	2.66278e-14	9.01281e-13
CHMP7	0.139585	6.83004	2.68243e-14	9.0711e-13
GTF2F1	0.136123	5.02989	2.70062e-14	9.12434e-13
RNF227	0.103374	2.0761	2.71641e-14	9.16934e-13
ATP5MK	-0.227334	4.24475	2.753e-14	9.28446e-13
WWOX	0.134523	4.07721	2.82808e-14	9.52904e-13
TMEM158	0.555811	0.985375	2.86706e-14	9.65165e-13
THAP11	0.1121	4.32695	2.89912e-14	9.75077e-13
SMYD4	0.098497	4.73062	2.91391e-14	9.79169e-13
PGM2L1	-0.186335	4.44228	2.94624e-14	9.89141e-13
ZSCAN25	0.103389	5.37202	2.95398e-14	9.90846e-13
CWC25	0.109967	5.33053	2.99561e-14	1.00391e-12
LRRIQ3	-0.397313	0.603516	3.00905e-14	1.0075e-12
SEPHS1	0.0884352	4.50003	3.06685e-14	1.02594e-12
MAPKAP1	0.100641	6.19308	3.07671e-14	1.02831e-12
GSS	0.0930008	3.45718	3.11465e-14	1.04006e-12
FBXO32	0.143902	3.96324	3.13373e-14	1.04549e-12
SIGLEC10	0.236143	6.21046	3.22479e-14	1.07491e-12
FOXK2	0.13968	4.81703	3.26152e-14	1.08618e-12
ARL11	0.139628	6.03892	3.30201e-14	1.09815e-12
DUX4L8	-1.2729	-1.85252	3.30334e-14	1.09815e-12
RHOQP1	0.186173	0.327526	3.38368e-14	1.12385e-12
CRTC3	0.137477	5.84185	3.40583e-14	1.1302e-12
CD14	0.21473	7.35566	3.41962e-14	1.13312e-12
CCND3	0.165931	6.85634	3.4207e-14	1.13312e-12
PAXX	0.150596	4.00892	3.48448e-14	1.15322e-12
SMARCAL1	0.10941	4.14378	3.50688e-14	1.1596e-12
TLE1P1	0.244076	-0.811209	3.52008e-14	1.16294e-12
LINC02648	0.22657	2.11983	3.55983e-14	1.17503e-12
TRIM27	0.117452	6.67898	3.57055e-14	1.17723e-12
RN7SKP296	0.219909	2.16452	3.57401e-14	1.17723e-12
ZNF346	0.1316	4.19163	3.57599e-14	1.17723e-12
CAMSAP1	0.0802112	4.91786	3.71129e-14	1.2207e-12
COPS2	-0.273084	5.41371	3.76019e-14	1.23569e-12
ZNF133	0.0873802	4.38546	3.80181e-14	1.24827e-12
USP20	0.130225	5.54121	3.81558e-14	1.25169e-12
CASP2	0.150356	5.90131	4.08312e-14	1.33827e-12
EPHA8	-1.11998	0.23177	4.22748e-14	1.38437e-12
ACTR1B	0.0991984	5.21938	4.27856e-14	1.39987e-12
HNRNPA3P6	-0.392593	-1.04409	4.29791e-14	1.40494e-12
POMGNT2	0.161019	1.60552	4.30161e-14	1.40494e-12
PRPSAP1	0.0986802	3.81473	4.32771e-14	1.41223e-12
DDX31	0.107028	4.11882	4.3362e-14	1.41376e-12
RNU6-4P	-0.520058	0.896761	4.41201e-14	1.43722e-12
ZC3HAV1	0.142399	7.99596	4.50145e-14	1.46507e-12
TRAPPC12	0.139859	6.41447	4.57437e-14	1.48706e-12
TAFA5	-1.10936	-0.176511	4.57698e-14	1.48706e-12
CYB5D2	0.104404	2.72105	4.64504e-14	1.50786e-12
MORF4L1P1	-0.191104	3.04541	4.69898e-14	1.52404e-12
ZFYVE27	0.0986791	6.14816	4.77554e-14	1.54752e-12
SNORA22C	-0.578561	0.182727	5.01404e-14	1.6234e-12
CYC1	0.128167	4.73882	5.15998e-14	1.6692e-12
TLK2	0.0922521	6.44836	5.18136e-14	1.67466e-12
FAM86DP	0.196282	2.24802	5.243e-14	1.69312e-12
RPL31	-0.498507	6.6578	5.26471e-14	1.69866e-12
TRBV5-4	0.285843	1.11057	5.27434e-14	1.70029e-12
ZNG1DP	-0.281244	0.846	5.44206e-14	1.75284e-12
PSMB10	0.149006	5.85757	5.53272e-14	1.78051e-12
LRCH3	0.109541	6.35801	5.59436e-14	1.79879e-12
SNORA24B	-0.475434	-1.16759	5.69196e-14	1.82859e-12
TAF4B	0.12778	3.64863	5.74842e-14	1.84438e-12
DAG1	0.148511	3.34799	5.75099e-14	1.84438e-12
CDK5R1	0.202282	4.30818	5.83092e-14	1.8684e-12
PRKAB1	0.093642	5.07049	5.88087e-14	1.88279e-12
FDFT1	0.110809	6.19877	5.93247e-14	1.89768e-12
LINC00235	0.148429	2.67547	5.97189e-14	1.90865e-12
LINC00892	-0.25917	0.972299	6.07045e-14	1.93849e-12
RPS18P12	-0.442086	-0.821525	6.09535e-14	1.94477e-12
RPL3P4	-0.254198	1.1478	6.11885e-14	1.9506e-12
HAVCR1	0.212633	1.60261	6.18594e-14	1.9703e-12
PCED1A	0.126078	4.39992	6.25602e-14	1.99029e-12
ARIH2	0.0929582	6.78106	6.25937e-14	1.99029e-12
ATAD3B	0.147756	4.66958	6.52575e-14	2.07322e-12
ADCK2	0.10864	3.42309	6.57713e-14	2.08776e-12
HNRNPA1P7	-0.319023	-0.09253	6.64563e-14	2.10771e-12
ZNF202	0.0787079	3.82584	6.66041e-14	2.1106e-12
ZC4H2	0.153579	2.17204	6.74775e-14	2.13646e-12
BDH1	0.16885	3.47192	6.82777e-14	2.15996e-12
SIRPB3P	0.254716	0.713151	6.90214e-14	2.18152e-12
ATIC	0.109756	3.94202	6.9076e-14	2.18152e-12
HS3ST3B1	0.130151	4.35587	6.92025e-14	2.18366e-12
ZNF263	0.0922792	5.19878	6.94318e-14	2.18904e-12
NICOL1	-0.177386	1.82277	7.04359e-14	2.21882e-12
SNORA80D	-0.627654	0.500197	7.05719e-14	2.22022e-12
LIG3	0.111689	5.04797	7.05995e-14	2.22022e-12
ZNF433-AS1	0.0994009	3.80237	7.18717e-14	2.25832e-12
MSTO1	0.139484	2.45794	7.28561e-14	2.28732e-12
TRIM23	-0.222441	5.892	7.31523e-14	2.29469e-12
C15orf40	0.0868303	5.42052	7.34684e-14	2.30267e-12
CITED2	0.117711	5.08064	7.38655e-14	2.31317e-12
EDEM1	0.122899	7.16095	7.45767e-14	2.33348e-12
ZDHHC3	0.0998556	5.89902	7.51678e-14	2.35e-12
ZNF584	0.100901	2.34189	7.60162e-14	2.37453e-12
KLF1	0.361099	5.57614	7.66878e-14	2.39351e-12
TRBV10-3	0.300935	0.706177	7.77666e-14	2.42515e-12
ENTPD7	0.0937529	3.59763	8.00435e-14	2.49406e-12
PHKG2	0.129431	3.6829	8.4259e-14	2.62322e-12
KRT17P8	0.32339	4.39303	8.51262e-14	2.64801e-12
EYA3	0.120559	5.27456	8.53127e-14	2.65159e-12
NSFL1C	0.15699	6.73672	8.66006e-14	2.68938e-12
DEAF1	0.166346	3.47482	8.72464e-14	2.70718e-12
TRAJ16	0.191967	2.61524	8.77624e-14	2.72093e-12
PERP	-0.277549	0.94583	8.83219e-14	2.736e-12
RNU6-36P	-0.509696	0.235618	8.88063e-14	2.74872e-12
SKA2	-0.184592	3.1682	8.93709e-14	2.7639e-12
COG7	0.115527	3.77018	9.0552e-14	2.7981e-12
SEC61A1	0.104237	6.71195	9.40346e-14	2.90331e-12
YBX1	0.248904	8.8834	9.65406e-14	2.97821e-12
VPS11	0.106571	5.05542	9.69931e-14	2.9897e-12
RPL18AP3	-0.265286	2.21026	9.76607e-14	3.00779e-12
SFMBT2	0.121608	5.79149	9.92791e-14	3.05511e-12
SLC35A2	0.113401	2.8788	1.00933e-13	3.10344e-12
SPTSSA	-0.191906	3.22482	1.04112e-13	3.19643e-12
IRX6	-1.10952	-0.730493	1.04129e-13	3.19643e-12
ZSCAN21	0.10114	2.46854	1.05086e-13	3.22316e-12
LY9	0.162169	5.05443	1.06937e-13	3.27723e-12
PIGT	0.113287	5.13926	1.08952e-13	3.33624e-12
IGLV3-1	0.456351	1.48383	1.10517e-13	3.38138e-12
MIR3134	0.252766	-0.994654	1.11555e-13	3.41036e-12
SSR4	-0.162014	4.86001	1.13017e-13	3.4522e-12
ZMAT5	0.094813	3.37724	1.14472e-13	3.4938e-12
PRKCH	0.13685	7.90223	1.15641e-13	3.52658e-12
CMTM1	0.167225	2.66952	1.19475e-13	3.64052e-12
MGAT4B	0.164942	4.95378	1.20816e-13	3.67836e-12
FAM157B	0.262588	4.66497	1.23115e-13	3.74531e-12
NUDC	0.135062	4.49355	1.24057e-13	3.77089e-12
BRCA2	-0.231701	3.22235	1.29296e-13	3.92693e-12
CFL1	0.152796	6.50841	1.34286e-13	4.07518e-12
ELMOD3	0.0967296	4.86992	1.35323e-13	4.10328e-12
ACP6	0.13993	4.29762	1.3809e-13	4.1838e-12
UBE2Q2P13	0.150394	1.87981	1.40134e-13	4.24227e-12
PLD6	0.175911	2.59825	1.4028e-13	4.24323e-12
SNORD13	-0.718337	4.3022	1.46601e-13	4.43083e-12
ZBED4	0.110812	5.21791	1.50002e-13	4.52995e-12
ZNF790-AS1	0.151413	1.66527	1.5114e-13	4.56064e-12
LINC01089	0.186583	3.92906	1.51406e-13	4.56497e-12
ZFYVE19	0.113088	3.78075	1.52398e-13	4.59116e-12
MZT1	-0.259285	2.96068	1.5347e-13	4.61971e-12
SAYSD1	0.114909	3.92576	1.56728e-13	4.71398e-12
RETREG3	0.0959842	6.53791	1.59925e-13	4.80625e-12
NUF2	-0.292723	0.906007	1.61476e-13	4.84895e-12
TNFRSF4	0.225475	2.08001	1.61802e-13	4.85484e-12
SYNRG	0.119817	7.39613	1.63316e-13	4.89633e-12
ASIC2	-1.0608	-0.0243252	1.63796e-13	4.90677e-12
TNFSF14	0.146485	6.29198	1.68127e-13	5.03246e-12
LIG4	-0.257467	4.26893	1.68775e-13	5.04781e-12
CDHR3	0.182774	3.96981	1.71588e-13	5.12783e-12
NCOA1	0.135761	7.79023	1.73373e-13	5.17701e-12
RN7SL408P	-0.642446	-1.76653	1.74867e-13	5.21743e-12
PAXIP1-DT	0.112784	3.29639	1.77575e-13	5.294e-12
HLA-H	0.441406	5.35196	1.80775e-13	5.3851e-12
TYW1	0.10159	4.47882	1.82058e-13	5.419e-12
MIR1285-1	0.242667	-0.472473	1.82287e-13	5.42147e-12
MPDU1-AS1	0.138775	1.43304	1.82456e-13	5.42216e-12
CACNG4	-1.13209	-1.42029	1.83278e-13	5.44225e-12
ST6GALNAC4P1	0.161611	0.59906	1.83744e-13	5.45176e-12
LIN9	-0.204174	2.1813	1.84216e-13	5.4614e-12
LINC02972	0.59951	6.81571	1.85307e-13	5.48939e-12
MFHAS1	0.146117	4.9493	1.8733e-13	5.54489e-12
INVS	0.0986248	5.04747	1.87478e-13	5.54489e-12
SYTL1	0.159793	6.04015	1.87905e-13	5.55311e-12
PTPN1	0.110706	6.13776	1.91187e-13	5.64562e-12
GNG5	0.143778	3.56626	1.98899e-13	5.86871e-12
HMGCS1	-0.140019	4.66316	1.99962e-13	5.8954e-12
TMEM167A	-0.229698	6.60947	2.01507e-13	5.93626e-12
SNORA13	-0.609781	-0.968179	2.0775e-13	6.11532e-12
RPL9	-0.446006	7.40132	2.1036e-13	6.18351e-12
EXT2	0.101679	5.30501	2.10398e-13	6.18351e-12
RPL7P23	-0.624555	-1.3494	2.10888e-13	6.19205e-12
NOP53-AS1	-0.792919	-2.48664	2.11021e-13	6.19205e-12
CHKB-DT	0.124144	1.26172	2.1157e-13	6.20328e-12
MIR4521	-0.599444	-1.18162	2.14541e-13	6.28543e-12
WSB2	0.126713	5.13348	2.15946e-13	6.32163e-12
CENPE	-0.315727	2.21375	2.16837e-13	6.34273e-12
SNORA55	-0.396206	-1.30947	2.1864e-13	6.39046e-12
SLC35E1	0.150978	4.8258	2.18812e-13	6.39048e-12
SUPT4H1	-0.168923	2.1876	2.20774e-13	6.44273e-12
ARF4	0.115864	5.40275	2.24027e-13	6.53255e-12
GPKOW	0.108356	3.97971	2.266e-13	6.60239e-12
ZNF813	-0.222646	3.37044	2.28271e-13	6.64591e-12
LRIG1	0.116206	5.338	2.36021e-13	6.86615e-12
FRAT2	0.173114	8.2694	2.37619e-13	6.90727e-12
CMSS1	0.115351	3.32242	2.42132e-13	7.03295e-12
LGALS1	-0.211751	6.34661	2.42369e-13	7.03437e-12
RNU6-1152P	0.301893	-0.101411	2.4333e-13	7.05677e-12
MXD3	0.172129	5.27555	2.44901e-13	7.0968e-12
DUSP7	0.134	4.49005	2.46349e-13	7.13322e-12
SWINGN	0.264172	1.73579	2.47388e-13	7.15772e-12
DUX4L17	-1.06578	-0.866598	2.47748e-13	7.1626e-12
EFCAB13	-0.228346	3.61754	2.48699e-13	7.18452e-12
ZNF490	0.0959565	3.14924	2.61196e-13	7.53968e-12
DNASE2	0.147073	4.75923	2.65122e-13	7.64708e-12
ARSB	0.135112	4.99656	2.72984e-13	7.86778e-12
RN7SL735P	0.286619	0.888926	2.75342e-13	7.92427e-12
CDK9	0.103671	5.61179	2.7537e-13	7.92427e-12
GMDS	0.15303	3.6933	2.76274e-13	7.94415e-12
MFSD3	0.141035	1.95835	2.76638e-13	7.94849e-12
NDUFS2	0.102652	5.52656	2.7892e-13	8.00296e-12
MIR941-4	0.363976	-1.51419	2.78963e-13	8.00296e-12
RHOF	0.187028	4.35461	2.81164e-13	8.05988e-12
LSM5	-0.203525	3.24356	2.82421e-13	8.08969e-12
MAN1B1-DT	0.227151	-0.222029	2.84386e-13	8.13972e-12
GLIS1	-1.06211	-0.577405	2.86304e-13	8.18834e-12
TRBV5-1	0.238988	2.21504	2.88095e-13	8.23323e-12
KLF3-AS1	0.165318	2.84317	2.88847e-13	8.24841e-12
CHILL1	0.210805	2.60803	2.914e-13	8.31494e-12
DDX41	0.11664	5.05532	2.9433e-13	8.39213e-12
MTND1P32	0.319736	-1.73873	2.96087e-13	8.43578e-12
KCNJ18	-1.10639	-1.30253	2.98675e-13	8.50299e-12
RPL7AP66	-0.313788	-0.350066	3.00233e-13	8.53704e-12
SIMC1	0.13206	3.34645	3.00329e-13	8.53704e-12
AGMAT	0.15949	2.52949	3.00923e-13	8.54305e-12
RIC8A	0.103906	5.91139	3.00999e-13	8.54305e-12
DUX4L26	-1.08834	2.53112	3.01884e-13	8.56164e-12
RAB5IF	0.143079	5.5126	3.11027e-13	8.81424e-12
E4F1	0.107415	4.93687	3.13635e-13	8.8814e-12
URB1	0.123305	5.15506	3.19477e-13	9.0391e-12
PLBD1	0.175721	7.28667	3.19689e-13	9.0391e-12
STARD7-AS1	0.116222	2.12169	3.23556e-13	9.1391e-12
PTPDC1	0.107709	3.39491	3.23716e-13	9.1391e-12
TATDN2	0.12978	5.06637	3.29998e-13	9.30939e-12
GYPA	-0.39188	3.48808	3.31488e-13	9.34434e-12
GCNA	0.106105	3.20503	3.32313e-13	9.36052e-12
TMEM259	0.20262	5.48055	3.36413e-13	9.463e-12
NDUFB11	-0.164967	4.41575	3.36459e-13	9.463e-12
TOE1	0.0782233	3.20334	3.44023e-13	9.66845e-12
IGSF21	-1.08789	-0.656628	3.47947e-13	9.77136e-12
CHD6	0.109215	6.99916	3.59475e-13	1.00875e-11
CERS4	0.15387	3.73869	3.71412e-13	1.04146e-11
PRDM16	-1.0203	0.731539	3.75377e-13	1.05179e-11
ZNF516	0.17444	7.55868	3.77022e-13	1.05561e-11
RBM14	0.155531	5.99137	3.91899e-13	1.09643e-11
MIR3936HG	0.171706	2.30984	3.94712e-13	1.10348e-11
SNRPGP14	-0.180435	-0.100589	3.95607e-13	1.10515e-11
ALKBH5	0.110189	6.24106	3.9884e-13	1.11335e-11
LINC01126	0.164286	3.64275	4.08814e-13	1.13978e-11
TMEM238	0.223307	0.28373	4.0892e-13	1.13978e-11
ZNF711	-0.254242	1.43009	4.10379e-13	1.14299e-11
RPL21P53	0.942921	-2.26219	4.23506e-13	1.17867e-11
TMEM222	0.136035	3.54317	4.25841e-13	1.18428e-11
ZBTB17	0.0943859	4.43731	4.32224e-13	1.20114e-11
ZNF79	0.0989422	4.11419	4.36778e-13	1.21289e-11
CNNM3	0.162332	4.57081	4.462e-13	1.23813e-11
TTC33	-0.252565	4.20326	4.48901e-13	1.2447e-11
IER3IP1	-0.228853	3.25572	4.49895e-13	1.24653e-11
LRRC41	0.100037	4.56516	4.5898e-13	1.27075e-11
RPSAP29	-0.608638	-2.53882	4.60402e-13	1.27374e-11
GBA2	0.144713	5.53529	4.61367e-13	1.27547e-11
NKAPP1	0.127675	3.32427	4.71788e-13	1.30331e-11
TMTC4	0.131229	4.33335	4.77339e-13	1.31767e-11
DHTKD1	0.104983	5.76232	4.79141e-13	1.32166e-11
EIF3F	0.129367	6.62718	4.81815e-13	1.32806e-11
VPS26C	0.0829589	6.20989	4.82615e-13	1.32928e-11
TRAJ28	0.17443	2.66934	4.9006e-13	1.34879e-11
ZBTB33	-0.222002	5.23219	4.91379e-13	1.35142e-11
PIK3R5-DT	0.192365	0.384745	4.99061e-13	1.37154e-11
GAD1	-0.880648	-0.141996	5.00348e-13	1.37406e-11
MREG	0.104384	2.91718	5.15453e-13	1.4145e-11
MFSD5	0.105427	4.00337	5.21131e-13	1.4281e-11
CCDC122	-0.259298	2.47697	5.21527e-13	1.4281e-11
WDR77	0.110744	3.96139	5.21561e-13	1.4281e-11
SMURF2P1	0.134631	1.47866	5.28757e-13	1.44675e-11
PCNX2	0.133664	5.91546	5.37664e-13	1.47004e-11
POLR2L	-0.169789	3.09645	5.42735e-13	1.48281e-11
IGLV7-43	0.495732	-0.869888	5.44747e-13	1.48722e-11
UNC119B	0.109948	4.6716	5.48314e-13	1.49586e-11
IGLV5-45	-0.505377	-0.731278	5.51456e-13	1.50333e-11
IFITM3	0.466305	3.15017	5.57438e-13	1.51853e-11
SLC41A3	0.103304	3.89168	5.60228e-13	1.52502e-11
ZFYVE26	0.122541	6.13037	5.64649e-13	1.53593e-11
ZNF845	-0.286893	4.31848	5.68941e-13	1.54647e-11
GSKIP	-0.235863	4.3917	5.69867e-13	1.54786e-11
PRKN	0.163127	2.71464	5.71937e-13	1.55235e-11
CHMP6	0.144046	3.18827	5.8543e-13	1.58782e-11
RGS1	-0.357356	1.05251	5.91129e-13	1.60211e-11
EXOSC5	0.119126	2.80151	5.99185e-13	1.62276e-11
RNU6-878P	0.218007	-0.447449	6.02505e-13	1.63057e-11
TRIL	-1.02251	-0.553643	6.06219e-13	1.63943e-11
ZNF536	-1.03527	0.0119105	6.08156e-13	1.64348e-11
ABHD11	0.133177	2.23421	6.14133e-13	1.65843e-11
GMFB	-0.266818	6.04288	6.29381e-13	1.69837e-11
RNVU1-18	-1.51468	6.90233	6.32175e-13	1.70468e-11
BRIP1	-0.186669	3.06289	6.36977e-13	1.71638e-11
IMPDH1	0.194925	5.96655	6.41491e-13	1.7273e-11
MIR15A	-0.396977	-1.20749	6.46678e-13	1.74001e-11
RAB13	-0.366752	-0.577925	6.48126e-13	1.74264e-11
TMED7	-0.223125	5.95393	6.49739e-13	1.74572e-11
SLC25A19	0.118317	2.71987	6.7504e-13	1.8124e-11
FAM219B	0.0931154	5.30702	6.8116e-13	1.82751e-11
CPNE2	0.183841	3.62453	6.83433e-13	1.83229e-11
ZNF337	0.108428	5.30837	6.88131e-13	1.84356e-11
HMMR	-0.431568	0.239798	6.93945e-13	1.8578e-11
BLOC1S4	0.120478	4.48893	7.17392e-13	1.91919e-11
ASCL2	0.20439	3.44767	7.20025e-13	1.92485e-11
KLF2	0.136775	6.9519	7.29667e-13	1.94923e-11
LRIG2	0.110701	5.57612	7.31531e-13	1.95281e-11
HNRNPA1P10	-0.301189	-0.00997457	7.55571e-13	2.01554e-11
HLA-F-AS1	0.17346	3.00217	7.60546e-13	2.02736e-11
SNTB2	0.1151	5.8223	7.6306e-13	2.03261e-11
MTND4P32	0.33803	-1.56181	7.64882e-13	2.03601e-11
DNAJC11	0.110395	4.48923	7.82603e-13	2.08118e-11
ZNF76	0.139813	4.32186	7.82971e-13	2.08118e-11
RNU2-63P	-0.65325	-2.48009	7.88298e-13	2.09385e-11
CTSK	0.163674	2.52229	7.91276e-13	2.10026e-11
RN7SL23P	0.224359	0.349172	7.967e-13	2.11316e-11
POLR1HASP	0.128069	5.25532	8.23987e-13	2.18398e-11
LDHB	-0.228958	4.7104	8.32657e-13	2.20539e-11
HCN4	-1.05021	0.14543	8.51937e-13	2.25485e-11
TOMM34	0.126056	3.00036	8.55341e-13	2.26225e-11
MFSD14A	0.136879	3.37602	8.58197e-13	2.2682e-11
CNNM2	0.118369	4.11407	8.71154e-13	2.30081e-11
RNU6-6P	-0.503501	-0.316111	8.83186e-13	2.33093e-11
LRRCC1	-0.231104	2.1331	9.00709e-13	2.3755e-11
SLC30A8	-0.872989	-0.901897	9.13216e-13	2.40678e-11
RCN2	-0.14391	3.96932	9.21132e-13	2.42593e-11
CFAP410	0.152509	3.53457	9.40526e-13	2.47526e-11
LACTBL1	-1.08984	-1.08475	9.43776e-13	2.48206e-11
DUX4L19	-1.02563	0.609096	9.46776e-13	2.48819e-11
IL1R2	0.208744	6.56853	9.4848e-13	2.49091e-11
CCNY-AS1	0.133386	2.85198	9.5378e-13	2.50307e-11
GSTA7P	-0.973259	-2.07358	9.61666e-13	2.52062e-11
TICAM2	0.133038	2.27183	9.61822e-13	2.52062e-11
LYRM7	-0.153155	4.93601	9.69906e-13	2.54002e-11
PLEKHG4B	-0.970655	0.514474	9.7609e-13	2.55442e-11
ZNF778	0.0801835	4.62626	1.00319e-12	2.62351e-11
RPL34-DT	0.167488	1.91643	1.01371e-12	2.64914e-11
HEATR6	0.113462	4.31391	1.02687e-12	2.68166e-11
SLC4A5	0.163011	1.76011	1.03001e-12	2.68798e-11
EEF1B2P6	-0.670844	-2.0318	1.05107e-12	2.74102e-11
CEBPA	0.152601	5.52455	1.05587e-12	2.75162e-11
ETV6	0.200829	5.5377	1.0661e-12	2.77632e-11
SMAP2	0.178927	8.53287	1.07967e-12	2.80971e-11
EIF3FP3	-0.289856	-0.613966	1.11366e-12	2.89615e-11
CDR2	0.118018	4.74411	1.14122e-12	2.96574e-11
TESPA1	0.148328	5.82731	1.14538e-12	2.97448e-11
CENPV	0.143564	1.73809	1.15185e-12	2.9892e-11
PTGER2	0.142265	4.85036	1.17294e-12	3.04182e-11
XPO1	-0.141141	7.52841	1.17735e-12	3.05113e-11
DUSP18	0.156014	3.74461	1.17933e-12	3.05412e-11
LINC01415	-0.692847	-0.936078	1.2173e-12	3.15028e-11
ATG16L1	0.0954091	6.06277	1.24536e-12	3.22066e-11
MFSD14B	0.141728	6.53009	1.24808e-12	3.22546e-11
ZBTB41	-0.304258	5.1306	1.2573e-12	3.24702e-11
TEF	0.125794	2.91713	1.28026e-12	3.30403e-11
ACTR2	-0.152919	9.18915	1.2963e-12	3.3431e-11
LAMB2P1	0.148835	1.38345	1.303e-12	3.35807e-11
GPR137	0.129796	2.78378	1.32896e-12	3.42261e-11
CDK13	0.0891765	7.9813	1.33395e-12	3.43307e-11
GALNT1	-0.210216	5.88302	1.34568e-12	3.46058e-11
ELOVL1	0.10183	4.9592	1.34649e-12	3.46058e-11
MAML3	0.180328	4.61758	1.35337e-12	3.47485e-11
DUX4L18	-1.03705	-0.647162	1.35391e-12	3.47485e-11
RPL7P6	-0.674438	-2.14459	1.36355e-12	3.49718e-11
TOLLIP-DT	0.190617	0.0553993	1.3664e-12	3.50209e-11
NUDCD3	0.0982531	6.4986	1.37098e-12	3.5114e-11
NPIPB8	0.50803	-1.25018	1.39199e-12	3.56276e-11
CRY2	0.0975265	4.93514	1.40298e-12	3.58842e-11
UQCC1	0.105318	4.6718	1.41726e-12	3.62248e-11
DHX30	0.111409	5.0679	1.43e-12	3.65208e-11
LRRC49	-0.80897	0.504505	1.43081e-12	3.65208e-11
DUX4L9	-1.05369	-0.347642	1.45551e-12	3.7126e-11
LRRC38	-1.08591	-1.35121	1.45777e-12	3.71583e-11
RN7SL597P	-0.802976	-2.33524	1.46796e-12	3.73924e-11
SKOR2	-1.04971	-0.307506	1.4747e-12	3.75383e-11
NLRC3	0.137867	6.76853	1.50233e-12	3.82156e-11
RPL9P28	-0.728378	-2.43826	1.50507e-12	3.82591e-11
LINC00402	0.212829	4.87657	1.51723e-12	3.85419e-11
DYNLT3	-0.307265	3.68224	1.5288e-12	3.88095e-11
POPDC2	0.144339	1.6723	1.53344e-12	3.89007e-11
ACTN1-DT	0.199568	0.195553	1.53564e-12	3.893e-11
P3H1	0.08704	4.15018	1.54686e-12	3.91878e-11
CBLN1	-1.06416	-1.09672	1.549e-12	3.92153e-11
CLPX	-0.108066	5.99403	1.56476e-12	3.95875e-11
ELMO1	0.136692	7.54327	1.58047e-12	3.99577e-11
MACROD2	-0.422369	1.96027	1.60577e-12	4.05699e-11
NACA2	-0.427984	-0.835051	1.62849e-12	4.11159e-11
C1RL	0.153235	6.41345	1.63822e-12	4.13338e-11
RELL2	0.138934	3.14331	1.65167e-12	4.16448e-11
TIGD4	-0.324611	-0.60625	1.6673e-12	4.20105e-11
PPP1R3E	0.116098	4.60217	1.67086e-12	4.20717e-11
CENATAC	0.112297	5.34119	1.67603e-12	4.21734e-11
TRAJ3	0.184361	2.2309	1.69044e-12	4.25074e-11
SERINC1	-0.221609	8.13382	1.69161e-12	4.25082e-11
FOXF1	-1.0755	-1.13532	1.71418e-12	4.30459e-11
KCNA5	-0.712849	-0.478191	1.71532e-12	4.30459e-11
CCR5	-0.240044	4.55249	1.76428e-12	4.42448e-11
ACKR3	0.12389	2.25353	1.78982e-12	4.4833e-11
SLC41A2	-0.17809	1.65808	1.79015e-12	4.4833e-11
PAX7	-1.04748	-0.134055	1.79839e-12	4.50093e-11
DPRXP3	0.262072	0.254591	1.79983e-12	4.50151e-11
MMACHC	0.173804	1.1117	1.81229e-12	4.52963e-11
RFXANK	0.108495	4.57898	1.835e-12	4.58331e-11
RNU6-125P	0.190032	0.904404	1.83814e-12	4.58808e-11
MBOAT1	0.114902	5.39833	1.86571e-12	4.65379e-11
ABCF2-H2BK1	-0.392423	-2.11879	1.95792e-12	4.87751e-11
ANKZF1	0.109031	6.27986	1.95802e-12	4.87751e-11
NPM1P6	-0.438604	-1.35875	1.98725e-12	4.94701e-11
NKX2-2	-1.08654	-1.52063	2.00485e-12	4.9875e-11
FAM76B	-0.210659	5.79973	2.00773e-12	4.99133e-11
RPL23AP34	0.207844	1.51203	2.03216e-12	5.0487e-11
MAPRE2	0.112143	5.94099	2.06371e-12	5.12366e-11
SLC25A53P1	0.179318	-0.293071	2.06845e-12	5.13202e-11
ASH1L	0.0992532	7.86426	2.07365e-12	5.1415e-11
MN1	-0.779799	0.746323	2.10548e-12	5.21693e-11
EMD	0.142758	2.89998	2.1147e-12	5.23631e-11
EEF1A1P5	-0.354564	5.68426	2.1604e-12	5.34591e-11
LIPT2	0.159827	1.64934	2.17208e-12	5.36962e-11
EXOC5	-0.179884	6.34069	2.17286e-12	5.36962e-11
SNORA65	-0.272095	-0.0767778	2.22721e-12	5.50029e-11
FCAR	0.192423	5.37665	2.23377e-12	5.51283e-11
VPS25	0.115263	4.12995	2.27044e-12	5.59961e-11
PTCD1	0.126522	1.91545	2.33628e-12	5.75819e-11
RPL10	0.158974	9.17576	2.36244e-12	5.81883e-11
TRIM24	0.0945351	5.52932	2.40118e-12	5.91034e-11
PTPRO	-0.185181	4.05544	2.40315e-12	5.91052e-11
NUTF2	0.117144	4.58033	2.40443e-12	5.91052e-11
HYAL2	0.120809	2.59132	2.41762e-12	5.93903e-11
C2orf76	-0.130497	2.46672	2.42325e-12	5.94894e-11
TIMP1	0.215617	3.63606	2.43621e-12	5.97639e-11
WDR35	-0.137759	4.19019	2.43764e-12	5.97639e-11
PPP5C	0.123101	4.42904	2.44076e-12	5.98011e-11
TJP1	-0.933156	0.391413	2.45186e-12	6.00335e-11
RPLP0P9	-0.381605	-1.05049	2.45426e-12	6.00528e-11
POF1B	-0.338488	-0.148288	2.45889e-12	6.01267e-11
MAGEL2	-1.0551	-0.99639	2.46646e-12	6.02722e-11
DCAF15	0.178902	3.67942	2.48591e-12	6.07077e-11
GALNT11	0.0893416	5.17325	2.55025e-12	6.2238e-11
TBC1D8B	-0.211778	1.68069	2.58227e-12	6.29782e-11
PLK4	-0.205141	1.57717	2.66146e-12	6.48673e-11
CSMD2	-1.02769	1.66096	2.68301e-12	6.53497e-11
RPL23P6	-0.582001	-1.48049	2.69863e-12	6.56873e-11
CNOT9	0.091486	5.58935	2.70792e-12	6.58704e-11
PLEKHF2	-0.192714	5.80162	2.73066e-12	6.63802e-11
TRBV6-6	0.238369	0.152657	2.75406e-12	6.69054e-11
IL15RA	0.128111	3.23285	2.76636e-12	6.71605e-11
HPRT1	-0.175293	2.03891	2.77382e-12	6.72976e-11
SPG21	0.0989239	6.41107	2.90603e-12	7.04595e-11
CACNG1	-1.14929	-2.17959	2.94201e-12	7.12853e-11
CDCA4	0.115983	3.25291	2.97304e-12	7.19906e-11
SOCS6	-0.166565	2.97833	2.98507e-12	7.22348e-11
SLC25A15	0.0966097	2.62951	2.9873e-12	7.22419e-11
SNORD17	-0.409759	8.66544	3.01448e-12	7.28518e-11
MYOM1	0.168927	3.10508	3.04468e-12	7.35341e-11
GEMIN5	0.0879317	4.36043	3.0763e-12	7.42496e-11
DYNC1I2P1	-0.424804	-1.38403	3.08091e-12	7.42921e-11
SNAP47	0.0752337	4.13641	3.08205e-12	7.42921e-11
UBE2K	-0.148667	6.07339	3.09056e-12	7.44492e-11
COX7B	-0.229431	3.88339	3.15467e-12	7.59445e-11
RN7SL3	0.514031	10.476	3.19463e-12	7.68568e-11
AAK1	0.149019	7.65649	3.1987e-12	7.6905e-11
KCTD5	0.0942813	4.95837	3.24658e-12	7.80058e-11
SLC35E1P1	0.228544	-0.320353	3.29005e-12	7.89994e-11
SNX16	-0.25519	3.98132	3.29871e-12	7.91564e-11
C1orf35	0.0931673	3.72939	3.33245e-12	7.99146e-11
DAB2IP	-0.853713	0.91363	3.35698e-12	8.0451e-11
CHMP2A	0.151573	5.532	3.36345e-12	8.0517e-11
SNRPD2	-0.291322	4.92136	3.36406e-12	8.0517e-11
MIR548AA2	0.323185	-0.51648	3.38301e-12	8.09187e-11
NR2E3	-1.02915	-0.569797	3.4023e-12	8.1328e-11
ACTA2-AS1	0.166289	3.46023	3.41402e-12	8.1509e-11
KCTD21	0.139757	3.25507	3.41425e-12	8.1509e-11
LINC02907	-1.11358	-1.84805	3.42142e-12	8.16279e-11
DMWD	0.203142	2.87887	3.44007e-12	8.20202e-11
TRABD-AS1	0.158279	2.79632	3.46096e-12	8.24656e-11
ANKRD55	0.2369	2.60169	3.51144e-12	8.3615e-11
BCKDK	0.134967	4.24695	3.54398e-12	8.43359e-11
SLITRK4	-0.225093	2.41627	3.56087e-12	8.46837e-11
MAN2B1	0.145854	6.16069	3.56604e-12	8.47525e-11
RPS27AP16	-0.395003	2.13963	3.59233e-12	8.53231e-11
CRNDE	-0.804702	-0.410759	3.6336e-12	8.62482e-11
TPP1	0.200344	5.2356	3.63623e-12	8.62556e-11
NAA50	-0.143519	7.06824	3.66945e-12	8.69884e-11
TBL1XR1	-0.158937	8.20189	3.78671e-12	8.97112e-11
GATAD1	0.0911318	5.38849	3.8126e-12	9.0267e-11
RSL24D1	-0.381681	5.08504	3.846e-12	9.10001e-11
ANKRD40	0.0930031	4.23317	3.87704e-12	9.16762e-11
ZNF248-AS1	0.163438	0.46351	3.88271e-12	9.17521e-11
CCAR1	0.0992267	6.10352	3.90091e-12	9.21238e-11
THAP4	0.136152	2.68031	3.91779e-12	9.24637e-11
RPS6KA1	0.128421	7.48967	3.92463e-12	9.25163e-11
MIER3	-0.206903	4.73156	3.92498e-12	9.25163e-11
PSENEN	0.143273	3.62009	3.93852e-12	9.27436e-11
CIAPIN1	0.0819443	4.14208	3.9396e-12	9.27436e-11
FHIT	0.243952	4.36055	3.96745e-12	9.33402e-11
ZZEF1	0.146926	7.72147	3.97675e-12	9.35001e-11
NUBP2	0.103023	4.83139	3.98148e-12	9.35523e-11
DHRS4	0.124513	3.52378	4.01089e-12	9.41838e-11
SLC16A13	0.212149	0.827771	4.08202e-12	9.57938e-11
C21orf91	-0.248382	6.12437	4.13252e-12	9.6918e-11
MAP9	-0.223597	2.93647	4.14949e-12	9.72546e-11
MAD2L2	0.103874	3.39062	4.15635e-12	9.73543e-11
KATNBL1P6	-0.570405	-1.8119	4.23135e-12	9.90487e-11
MPPED1	-0.985814	-0.0169997	4.25877e-12	9.9628e-11
BLOC1S2	-0.216257	4.43558	4.35365e-12	1.01784e-10
BLOC1S6	-0.166999	6.38504	4.38241e-12	1.02392e-10
ASPG	-0.983954	0.054772	4.40651e-12	1.0289e-10
FOXB1	-0.984741	-0.998812	4.43444e-12	1.03478e-10
MPV17L2	0.133625	1.20899	4.44621e-12	1.03687e-10
NOA1	0.0942611	4.11777	4.4599e-12	1.03942e-10
DUX4L34	-1.02104	-1.02249	4.49565e-12	1.04709e-10
LHX1	-1.01188	-0.398647	4.55044e-12	1.05919e-10
TPT1-AS1	0.163624	4.60465	4.56569e-12	1.06208e-10
GPRASP1	0.153617	5.47533	4.6363e-12	1.07783e-10
GPS1	0.100147	4.46859	4.6702e-12	1.08503e-10
SHISAL2A	0.201395	3.33149	4.72869e-12	1.09794e-10
TAF8	0.113168	5.81334	4.7502e-12	1.10225e-10
COLQ	0.209891	3.12104	4.81498e-12	1.11658e-10
LYRM2	-0.19021	4.48397	4.8531e-12	1.12472e-10
TRAJ29	0.169389	2.99573	4.86754e-12	1.12737e-10
TGFBR2	0.10249	8.58108	4.88451e-12	1.1306e-10
THAP3	0.078582	3.30963	4.94276e-12	1.14337e-10
SLA	0.128244	9.01335	4.96631e-12	1.1481e-10
FAM117A	0.222435	5.85851	4.98881e-12	1.15259e-10
DYM	0.090496	6.1152	5.00813e-12	1.15634e-10
TDP1	0.0837549	5.04197	5.0508e-12	1.16547e-10
LYSMD4	0.104534	4.1113	5.07365e-12	1.17002e-10
C2CD4A	-0.979525	-0.948054	5.18527e-12	1.19476e-10
S100A6	-0.159244	6.54708	5.18734e-12	1.19476e-10
PHF8	0.115346	5.85489	5.24694e-12	1.20774e-10
TAX1BP1	-0.203543	7.28959	5.31084e-12	1.22169e-10
SYNDIG1	-1.01107	-1.03027	5.37094e-12	1.23475e-10
GRK6	0.138659	7.09436	5.4493e-12	1.252e-10
C8orf82	0.125745	2.94501	5.54484e-12	1.27316e-10
RAP2C	-0.210162	5.63036	5.60923e-12	1.28715e-10
HSPE1P3	0.184	-0.193255	5.61863e-12	1.28852e-10
ADCY9	0.186272	3.84595	5.74817e-12	1.31741e-10
TIRAP	0.162638	3.74438	5.75666e-12	1.31855e-10
RBP3	-1.04153	-1.05876	5.95578e-12	1.36332e-10
MRM3	0.0934666	3.5319	5.97603e-12	1.36711e-10
SYT15-AS1	-0.249049	0.426744	6.07628e-12	1.38919e-10
MTCH1	0.10404	6.30895	6.12509e-12	1.3995e-10
UBE2Q2	-0.132549	4.75648	6.15278e-12	1.40496e-10
KAT7	0.109973	6.76264	6.2132e-12	1.41789e-10
REXO4	0.0900091	4.49197	6.24163e-12	1.42294e-10
GJB3	-1.04776	-1.27735	6.24299e-12	1.42294e-10
DMRTA2	-1.02495	-0.522608	6.34628e-12	1.4456e-10
C19orf25	0.1185	4.92488	6.3693e-12	1.44996e-10
ZNF460	0.107853	6.65994	6.41172e-12	1.45873e-10
TMEM35B	-0.224363	-0.539979	6.42118e-12	1.45999e-10
CDC42BPA	-0.251922	3.70349	6.43762e-12	1.46283e-10
RGCC	0.183147	5.19453	6.46494e-12	1.46814e-10
RPS27	-0.416703	8.17916	6.47554e-12	1.46894e-10
RIMBP2	-0.885549	0.644852	6.47632e-12	1.46894e-10
TTK	-0.385262	0.634156	6.48796e-12	1.47068e-10
TSNAX	-0.196024	5.51002	6.50203e-12	1.47298e-10
HMGB1P6	-0.314726	1.21758	6.51097e-12	1.47411e-10
MEG8	-0.693178	0.873675	6.55037e-12	1.48213e-10
METTL1	0.156412	0.766293	6.58141e-12	1.48825e-10
LINC01502	-1.04761	-1.37722	6.65683e-12	1.50439e-10
C16orf87	-0.102472	3.47805	6.70053e-12	1.51335e-10
POLR2F	0.0843057	4.14315	6.71986e-12	1.51679e-10
PLAC8	0.121005	7.13314	6.75664e-12	1.52417e-10
ZNRF2P2	0.275641	0.101187	6.80804e-12	1.53484e-10
TSPYL4	0.0859581	4.05358	6.81565e-12	1.53516e-10
CAPZA2	-0.253743	7.26976	6.81773e-12	1.53516e-10
BUD13	0.0779275	4.12828	6.82426e-12	1.53571e-10
GRIN2A	-0.982095	0.876441	6.89031e-12	1.54963e-10
ANKFN1	-0.943019	0.102905	7.00699e-12	1.57492e-10
SHARPIN	0.186777	4.41488	7.02173e-12	1.57729e-10
SEPTIN10	-0.188825	1.92808	7.02739e-12	1.57761e-10
SALL3	-1.01306	0.166759	7.16793e-12	1.60819e-10
HDAC2	-0.149997	4.96024	7.25385e-12	1.62649e-10
MIR16-2	-0.396568	-2.11605	7.32502e-12	1.64079e-10
CYSTM1	0.187851	4.31939	7.32645e-12	1.64079e-10
HRAS	0.152248	1.74311	7.50721e-12	1.68026e-10
LINC01896	-1.0408	-1.18349	7.53782e-12	1.6861e-10
STX10	0.128356	6.02588	7.64619e-12	1.70932e-10
TRAJ30	0.171096	2.20789	7.74846e-12	1.73114e-10
ARHGEF16	-0.967665	-0.16132	7.76921e-12	1.73474e-10
COX7A2	-0.241365	5.07095	7.81963e-12	1.74495e-10
SMYD3	0.145325	4.55512	7.86709e-12	1.75449e-10
ZNF423	-0.984682	0.40897	8.15161e-12	1.81685e-10
FOXA2	-1.03333	-1.1154	8.1761e-12	1.82122e-10
ANKRD27	0.0757066	5.49183	8.24201e-12	1.83463e-10
TMEM132E	-0.860314	0.312332	8.24616e-12	1.83463e-10
FOXL1	-1.01932	-0.474893	8.26221e-12	1.83711e-10
BARX1	-1.03754	-1.32045	8.27203e-12	1.8382e-10
NR3C2	0.133566	5.06927	8.35226e-12	1.85492e-10
SHOC2	-0.179688	7.34634	8.4776e-12	1.88163e-10
ACTG1P3	0.157413	2.059	8.60196e-12	1.9081e-10
SOWAHC	-0.194147	1.97149	8.63389e-12	1.91404e-10
ZC3H12B	0.192959	1.30017	8.65108e-12	1.91671e-10
ITGA6-AS1	0.149838	0.834409	8.84274e-12	1.95801e-10
NFKBIL1	0.125626	1.72495	8.8998e-12	1.96948e-10
NEUROG1	-1.08101	-1.88704	9.00525e-12	1.99163e-10
UBE2G2	0.0923583	6.77015	9.03871e-12	1.99784e-10
LIN7C	-0.212795	5.92869	9.07508e-12	2.00469e-10
SHANK2	-0.938175	1.33384	9.1043e-12	2.00996e-10
PCDH9	-0.347206	5.40025	9.12976e-12	2.01439e-10
SOX9	-1.01382	-0.776035	9.16013e-12	2.01989e-10
FPGT	-0.253929	4.37978	9.23172e-12	2.03447e-10
TAFAZZIN	0.138734	4.49359	9.28444e-12	2.04488e-10
ZNF785	0.165335	3.02709	9.29519e-12	2.04566e-10
MYNN	-0.210995	5.16857	9.29894e-12	2.04566e-10
SMARCA5	-0.187056	6.66177	9.33513e-12	2.05241e-10
PHETA2	0.12189	2.22795	9.43133e-12	2.07233e-10
CETN3	-0.267677	2.5739	9.47398e-12	2.08048e-10
ACSS1	0.113452	5.7411	9.49876e-12	2.08469e-10
CRCP	0.0917214	4.88356	9.55319e-12	2.0954e-10
TUBGCP4	0.116255	4.34542	9.5931e-12	2.10292e-10
ESRRB	-0.901423	-0.380851	9.78484e-12	2.14369e-10
TUBGCP3	0.110521	6.37043	9.88572e-12	2.16452e-10
BARHL1	-1.04694	-1.15125	9.9605e-12	2.17961e-10
RNU6-1	-0.465666	-0.049838	9.96671e-12	2.17969e-10
HRH2	0.19567	6.48849	1.0079e-11	2.20296e-10
PRKRIP1	0.085803	4.80474	1.01498e-11	2.21714e-10
CRB2	-0.915676	0.420779	1.02599e-11	2.23986e-10
ALDH7A1P3	0.409863	-1.64347	1.03327e-11	2.25444e-10
VPS26A	-0.144972	4.85027	1.04064e-11	2.2692e-10
FOXC2	-1.02691	-0.966415	1.05915e-11	2.30821e-10
TBC1D25	0.174304	3.46046	1.06235e-11	2.31383e-10
PDE8A	0.0976079	5.37874	1.06652e-11	2.32155e-10
KCNT1	-0.922747	1.26922	1.07469e-11	2.33796e-10
MTATP6P19	0.411744	-2.23384	1.0778e-11	2.34336e-10
CRADD	0.0964647	4.0342	1.09062e-11	2.36985e-10
FZD10	-1.02614	-1.16177	1.11703e-11	2.42584e-10
PPOX	0.109434	3.91882	1.14316e-11	2.48114e-10
MRTO4	0.1141	3.62955	1.14456e-11	2.48272e-10
WDR59	0.104998	5.03702	1.15309e-11	2.49976e-10
PRCC	0.102632	3.92951	1.15679e-11	2.50633e-10
H3C12	0.322247	3.19469	1.16832e-11	2.52985e-10
ORAI3	0.113191	4.6094	1.17165e-11	2.53558e-10
CENPQ	-0.277374	1.87633	1.19128e-11	2.57657e-10
ZNG1A	-0.159966	4.8647	1.20366e-11	2.60183e-10
STARD10	0.198822	2.21215	1.20531e-11	2.6039e-10
DHFR2	-0.155839	3.83378	1.20731e-11	2.60671e-10
LRRC4	0.176825	5.54493	1.21412e-11	2.61988e-10
ZNF652-AS1	0.128058	1.03834	1.22227e-11	2.63594e-10
TPD52L2	0.121817	6.79583	1.22734e-11	2.64534e-10
SOCS2	0.133561	3.47959	1.23186e-11	2.65355e-10
MIR548P	-0.243271	0.744548	1.23268e-11	2.65378e-10
DPP3-DT	0.134901	1.24602	1.23743e-11	2.66248e-10
LYSMD3	-0.257877	5.61133	1.24163e-11	2.66869e-10
TNRC6C	0.136875	6.06564	1.24175e-11	2.66869e-10
HS3ST4	-0.989337	-0.719454	1.25026e-11	2.68542e-10
PANK1	-0.18783	1.89907	1.25183e-11	2.68724e-10
CHAC2	-0.2264	0.907956	1.26422e-11	2.71228e-10
NHLRC4	0.15901	1.69721	1.2744e-11	2.73255e-10
USF1P1	0.156431	1.82482	1.28813e-11	2.76042e-10
SIRT5	0.0743231	4.32369	1.29817e-11	2.78033e-10
TAPBP	0.235883	6.6649	1.29985e-11	2.78233e-10
CDH4	-0.888991	0.273045	1.31195e-11	2.80661e-10
TM9SF3	-0.174718	7.22611	1.32678e-11	2.8367e-10
VAMP1	0.136712	5.18806	1.32782e-11	2.83731e-10
AURKAIP1	0.117873	5.46703	1.33513e-11	2.85129e-10
ARF1	0.131202	7.15617	1.36532e-11	2.9132e-10
MSS51	0.111416	3.32731	1.36568e-11	2.9132e-10
RSL1D1-DT	0.149407	0.561426	1.36778e-11	2.916e-10
TEX264	0.0819191	5.27057	1.37224e-11	2.92384e-10
PLEKHM3	0.120368	6.04065	1.37501e-11	2.92807e-10
CENPH	-0.176984	1.58624	1.38002e-11	2.93705e-10
RNVU1-32	-0.668956	0.13901	1.40966e-11	2.99749e-10
EIF4HP1	-0.222434	0.5125	1.41002e-11	2.99749e-10
LINC02100	0.142464	2.27914	1.4111e-11	2.99807e-10
ZBTB6	-0.213623	5.098	1.4135e-11	3.00146e-10
C2orf42	0.0744871	3.70257	1.44641e-11	3.06958e-10
CFAP20	0.0969689	3.7843	1.44881e-11	3.07293e-10
PINK1-AS	0.143614	2.61674	1.47146e-11	3.1192e-10
BRMS1L	-0.152845	1.89173	1.49627e-11	3.16998e-10
TLX3	-1.03838	-1.33623	1.50001e-11	3.17609e-10
MAX	0.104888	7.05015	1.50864e-11	3.19256e-10
ADAMTS2	-0.881299	0.873326	1.51404e-11	3.20217e-10
H2BP9	0.215446	-1.16226	1.52465e-11	3.22278e-10
FAM98C	0.113993	3.72468	1.52637e-11	3.22458e-10
RPL34	-0.437341	6.06085	1.53017e-11	3.23078e-10
NFX1	0.0885473	5.62525	1.5394e-11	3.24844e-10
RNU6-94P	-0.152159	0.0010122	1.54331e-11	3.25333e-10
E2F1	0.223254	1.19585	1.54347e-11	3.25333e-10
PITRM1	0.104808	5.19432	1.5453e-11	3.25535e-10
RNF175	0.256716	1.65361	1.54783e-11	3.25885e-10
MYOD1	-1.04392	-1.37896	1.54882e-11	3.25909e-10
GLI2	-0.989665	0.346843	1.55406e-11	3.26827e-10
CHRAC1	0.0986014	3.1069	1.56168e-11	3.28244e-10
DLAT	-0.0841416	3.71305	1.57425e-11	3.30699e-10
ANKRD6	0.101961	3.4555	1.61589e-11	3.39256e-10
PDIK1L	-0.217831	3.78801	1.61985e-11	3.39895e-10
LINC02181	-0.970673	-1.17384	1.62192e-11	3.40137e-10
FKBP14-AS1	0.169574	0.580657	1.66689e-11	3.49371e-10
HMX3	-1.05549	-1.56953	1.68641e-11	3.53264e-10
TFEC	-0.282912	5.87518	1.6948e-11	3.54822e-10
NKX2-8	-1.06423	-1.73248	1.70067e-11	3.55851e-10
GNAS	0.175248	7.68338	1.70929e-11	3.57455e-10
SERPINB9	0.129668	6.48192	1.71967e-11	3.59424e-10
ARMC10P1	-0.261827	-1.23104	1.73332e-11	3.62074e-10
LHX5	-1.00873	-0.663572	1.73671e-11	3.62579e-10
RNF185	0.102499	4.9398	1.73958e-11	3.62957e-10
BMP3	-0.526465	-0.496086	1.74047e-11	3.62957e-10
ARPC1A	-0.0895746	3.28597	1.74733e-11	3.64184e-10
MSTO2P	0.148383	1.86759	1.75403e-11	3.65376e-10
ZNF668	0.13567	2.02791	1.77242e-11	3.69e-10
EGR4	-1.03586	-1.38437	1.77593e-11	3.69525e-10
ZNF441	-0.297238	4.28358	1.78783e-11	3.71671e-10
SALL1	-0.991431	-0.938523	1.78857e-11	3.71671e-10
AP1S2	-0.259219	6.7423	1.78924e-11	3.71671e-10
SAMD1	0.238531	1.46902	1.79325e-11	3.72297e-10
PHACTR3	-0.83728	0.234844	1.79867e-11	3.73214e-10
PPP1R2B	-0.419495	-1.39047	1.80643e-11	3.74616e-10
MIR421	0.219248	2.05701	1.81739e-11	3.76678e-10
TWSG1	-0.152645	3.42557	1.82722e-11	3.78506e-10
RPL21P97	-0.555085	-2.41751	1.8869e-11	3.90652e-10
FAM120B	0.130469	6.35244	1.89491e-11	3.92092e-10
CLYBL	0.120597	3.04005	1.89736e-11	3.9238e-10
HMBOX1	0.115228	6.13178	1.92437e-11	3.97746e-10
SOWAHD	0.140752	3.34486	1.93084e-11	3.98862e-10
KLF3P1	0.242149	-0.753242	1.93388e-11	3.99268e-10
ARL8BP2	0.167853	1.44549	1.94743e-11	4.01843e-10
ZSWIM1	0.144575	2.33001	1.95665e-11	4.03522e-10
EIF4EBP1	0.143723	1.39054	1.97252e-11	4.0657e-10
RPL22L1	-0.267183	2.99557	1.9959e-11	4.11063e-10
KCNC1	-0.965608	0.664359	1.99652e-11	4.11063e-10
CARTPT	-1.14699	-2.50648	1.99779e-11	4.11096e-10
MKNK2	0.202175	6.5869	2.01434e-11	4.14273e-10
ACTL8	-1.0262	-1.28191	2.01966e-11	4.15138e-10
SETD4	0.0809091	4.6504	2.0518e-11	4.21512e-10
ELMOD2	-0.219347	5.60921	2.0661e-11	4.24217e-10
CELF2	0.116208	9.12722	2.07499e-11	4.25808e-10
HSPA13	-0.238371	5.00081	2.09614e-11	4.2991e-10
ETNK1	-0.20984	7.13882	2.09761e-11	4.29974e-10
DLGAP2	-0.891052	1.0297	2.10934e-11	4.32142e-10
RFK	-0.159494	3.87391	2.11479e-11	4.3302e-10
RNU7-48P	-0.243273	-0.764155	2.13012e-11	4.3592e-10
CIMAP1B	0.233193	4.29183	2.13386e-11	4.36445e-10
STMN3P1	-0.966355	-2.51974	2.13762e-11	4.36975e-10
FOXO6	-0.937082	-0.835913	2.15977e-11	4.41261e-10
LCE2A	-1.22841	-2.74697	2.17034e-11	4.43178e-10
MEX3B	-0.589548	0.127298	2.18485e-11	4.45895e-10
ATF7	0.235189	4.08378	2.18768e-11	4.46228e-10
IFTAP	-0.226861	0.354924	2.19818e-11	4.48126e-10
CCND1	-0.400575	0.9266	2.21049e-11	4.5039e-10
RNF128	-0.937604	-1.90717	2.21243e-11	4.50538e-10
PTAFR	0.15357	8.11171	2.25093e-11	4.58128e-10
ANKRD39	0.0858626	2.43185	2.26362e-11	4.60253e-10
STAG3L3	0.172774	4.21232	2.26384e-11	4.60253e-10
HGH1	0.141537	2.35959	2.26527e-11	4.60292e-10
ARNT2	-0.902704	0.247172	2.28263e-11	4.63566e-10
PNPLA5	-1.01304	-0.891864	2.29686e-11	4.66203e-10
SIX2	-1.01749	-1.30327	2.30337e-11	4.67269e-10
RNU1-136P	-1.25053	-3.18126	2.31234e-11	4.68833e-10
ZBED6	0.177375	0.758412	2.31753e-11	4.69632e-10
WT1	-0.989638	-0.61996	2.32837e-11	4.71365e-10
ZNF835	0.213798	1.80238	2.32862e-11	4.71365e-10
LINC01395	0.308641	0.664267	2.33237e-11	4.71868e-10
EIF5A	0.125277	6.03324	2.34782e-11	4.74736e-10
ERLIN1	0.111278	4.87864	2.34958e-11	4.74835e-10
DHRS4L2	0.109489	2.65381	2.36303e-11	4.77203e-10
APOLD1	0.15508	3.26644	2.36386e-11	4.77203e-10
PRKAR1A	-0.146699	8.57746	2.3802e-11	4.80101e-10
NT5M	0.297841	3.17395	2.3808e-11	4.80101e-10
PAX1	-0.9814	-0.370871	2.44443e-11	4.92666e-10
SLAMF6	0.130674	5.32102	2.45166e-11	4.93857e-10
SPAG5-AS1	0.14229	0.661533	2.47384e-11	4.98057e-10
MRM1	0.112939	2.5771	2.48427e-11	4.99885e-10
SRRM4	-0.979557	0.156312	2.49858e-11	5.02495e-10
ITPKC	0.103143	3.39942	2.50971e-11	5.04296e-10
CEP44	-0.149309	5.08895	2.51025e-11	5.04296e-10
CEP250-AS1	0.125815	1.8886	2.51969e-11	5.05919e-10
DNAJB9	-0.226717	4.16257	2.52446e-11	5.06605e-10
SLC25A1	0.118905	3.11153	2.54551e-11	5.10554e-10
FAM90A25P	-1.14088	-2.61697	2.55885e-11	5.12954e-10
STK11	0.163145	6.85917	2.56919e-11	5.14749e-10
ACO2P1	-1.05131	-2.31494	2.57632e-11	5.15901e-10
RPL21P119	-0.768858	-2.7814	2.64036e-11	5.28441e-10
TMEM120A	0.116325	3.97891	2.67409e-11	5.34905e-10
TXNDC9	-0.220651	4.05956	2.68039e-11	5.35877e-10
MTCO2P19	0.323849	-1.90791	2.70421e-11	5.40131e-10
C12orf42	0.147802	3.18364	2.70457e-11	5.40131e-10
PVT1	0.154798	4.3817	2.70967e-11	5.40861e-10
GABPA	-0.194906	5.94582	2.75611e-11	5.49835e-10
DIS3L	0.0790489	4.89573	2.76206e-11	5.50727e-10
NTMT1	0.0912863	2.97083	2.77402e-11	5.52816e-10
ABHD6	0.0907665	3.17974	2.78853e-11	5.5541e-10
ZWILCH	-0.133859	2.86216	2.81188e-11	5.59762e-10
TXNDC12	0.122354	3.9972	2.85874e-11	5.68787e-10
MTOR	0.127137	6.10648	2.87166e-11	5.71052e-10
PTP4A3	0.164284	4.22351	2.89732e-11	5.75848e-10
WAKMAR2	0.144239	3.4359	2.94944e-11	5.85895e-10
ALX4	-0.988257	-0.533228	2.95211e-11	5.86114e-10
RNU6-33P	-0.45178	-0.0934533	2.95942e-11	5.87252e-10
RGMB	0.204957	2.87351	2.96719e-11	5.88479e-10
ZNNT1	0.144922	2.35348	2.97087e-11	5.88896e-10
FAM78A	0.138372	5.97527	2.97337e-11	5.89077e-10
SAE1	0.0960968	4.86997	2.97678e-11	5.8944e-10
THSD4	-0.961691	0.807278	2.98778e-11	5.91132e-10
DBX1	-0.975569	-1.58935	2.9885e-11	5.91132e-10
RPS10P5	-0.473423	-2.06713	2.99882e-11	5.92859e-10
GTF2A1	-0.143807	6.42524	3.01381e-11	5.95506e-10
NEFHP2	-0.99843	-0.957767	3.0327e-11	5.98922e-10
UMOD	-0.988403	-0.816577	3.03536e-11	5.9913e-10
LINC02781	-1.04204	-1.77832	3.05702e-11	6.03087e-10
ERC1	0.131518	5.84545	3.06671e-11	6.04677e-10
HS3ST2	-0.998533	-1.15085	3.12063e-11	6.14984e-10
RNF126	0.142747	4.09788	3.13631e-11	6.17747e-10
LINC01310	-0.994506	-0.755721	3.14675e-11	6.19477e-10
OTOG	-0.973284	0.969192	3.17036e-11	6.23795e-10
HARS1	0.0819722	5.19104	3.17382e-11	6.24146e-10
MCUR1P1	0.236381	-0.35614	3.17616e-11	6.24277e-10
LINC02188	-0.983926	-0.10194	3.3291e-11	6.53991e-10
ST8SIA2	-0.977801	-0.576002	3.40209e-11	6.67978e-10
TBX2	-0.967359	-0.0522072	3.41286e-11	6.6974e-10
FENDRR	-0.972464	-0.413729	3.4817e-11	6.82889e-10
PRDM2	0.106211	7.00603	3.5128e-11	6.88628e-10
CSNK1G3	-0.209831	5.33806	3.51631e-11	6.88952e-10
PRUNE1	0.115269	4.63195	3.52075e-11	6.89459e-10
GMDS-DT	0.108597	5.43812	3.52761e-11	6.90441e-10
SNHG17	0.157716	3.20763	3.53341e-11	6.91212e-10
LRRC25	0.190132	5.72105	3.56614e-11	6.9725e-10
SHLD3	-0.232811	2.17943	3.58433e-11	7.00439e-10
SLC39A3	0.111951	2.84164	3.59262e-11	7.01691e-10
RAB8A	0.115468	5.59667	3.6182e-11	7.06317e-10
IRX4	-0.991596	-0.62042	3.6587e-11	7.13848e-10
SHLD2P3	-0.314448	-0.582039	3.69318e-11	7.20199e-10
KIAA1586	-0.26394	4.35205	3.70658e-11	7.22435e-10
PACC1	0.0829585	4.09106	3.70989e-11	7.22702e-10
SLCO3A1	0.133045	6.78421	3.74688e-11	7.29525e-10
S1PR1-DT	0.144989	1.65231	3.77679e-11	7.34966e-10
MIR30E	0.151502	0.319015	3.78395e-11	7.35752e-10
SPDYA	-0.169953	2.55728	3.78478e-11	7.35752e-10
RPS7P11	-0.529371	-1.24581	3.80892e-11	7.40059e-10
NCF1C	0.180011	6.08902	3.85326e-11	7.48284e-10
GREM1-AS1	-1.02096	-1.4365	3.85569e-11	7.48365e-10
ATP6V0E2	0.123571	3.36169	3.88699e-11	7.54048e-10
C1orf94	-0.994783	-1.35757	3.94571e-11	7.6504e-10
RBM44	-0.174154	2.70726	3.98506e-11	7.72268e-10
NUDT16L1	0.0995714	4.10252	4.03199e-11	7.80957e-10
RPS13	-0.21533	7.72211	4.04562e-11	7.83191e-10
ANKRD17	0.109287	7.09614	4.08027e-11	7.89488e-10
TGIF2	0.124489	3.76433	4.09178e-11	7.91304e-10
BORCS7	-0.212305	3.63554	4.14635e-11	8.01442e-10
USP12P1	-0.667578	-2.12682	4.15933e-11	8.03534e-10
THAP7	0.101391	3.8932	4.1792e-11	8.06954e-10
CASK	0.108129	5.69841	4.19036e-11	8.0869e-10
TACC3	0.180736	5.91409	4.20839e-11	8.11749e-10
SULT4A1	-0.979305	-0.777383	4.2424e-11	8.17886e-10
CD55	0.167467	7.87931	4.26373e-11	8.21573e-10
CSTF1	0.0778274	4.67183	4.27777e-11	8.23852e-10
C2CD4B	-0.915278	-1.1274	4.30734e-11	8.29119e-10
LRRC37A15P	0.165029	1.93387	4.33242e-11	8.33515e-10
NXT2	-0.238579	3.37797	4.34751e-11	8.35987e-10
TREML1	0.289773	2.76863	4.37125e-11	8.40119e-10
SORCS2	-0.652687	0.757639	4.3862e-11	8.42557e-10
FRMD1	-0.96027	0.354732	4.4674e-11	8.57713e-10
IPPK	0.0706	4.25429	4.52209e-11	8.67767e-10
OXR1-AS1	-0.18625	-0.273533	4.54984e-11	8.72642e-10
TSPAN33	0.188441	3.84956	4.60744e-11	8.83236e-10
OSBPL8	-0.221414	8.93926	4.65521e-11	8.91934e-10
GPRIN2	-0.965018	-0.572302	4.66157e-11	8.92693e-10
RNF135	0.108873	4.65043	4.66578e-11	8.9304e-10
CHML	-0.243055	5.08401	4.66992e-11	8.93373e-10
MEG3	-0.669344	1.90848	4.67968e-11	8.94782e-10
ZDHHC16	0.101107	4.17088	4.71631e-11	9.01323e-10
LDLR	0.184467	3.34217	4.74066e-11	9.05512e-10
CHFR	0.110145	6.56843	4.76829e-11	9.10322e-10
METTL14	-0.13838	5.20713	4.81582e-11	9.18926e-10
CHRM3-AS2	0.242627	4.85443	4.81924e-11	9.19109e-10
ZCWPW2	-0.170463	0.536498	4.85114e-11	9.24719e-10
LPXN	0.0921623	5.64773	4.86779e-11	9.27419e-10
PRELID1	0.128387	6.2876	4.87146e-11	9.27643e-10
LGALS8	0.0999237	6.80967	4.8962e-11	9.31878e-10
RNU6-3P	-0.441353	0.618708	4.94034e-11	9.39799e-10
SLC35C2	0.0977585	5.89048	4.98928e-11	9.48625e-10
MIR26A2	0.200509	-0.254517	5.01771e-11	9.53544e-10
GIMAP5	0.133655	6.37699	5.0363e-11	9.56589e-10
LINC00301	-1.00848	-1.67096	5.04069e-11	9.56934e-10
MNS1	-0.880637	-1.07492	5.10335e-11	9.67947e-10
TMX1	-0.243128	5.82456	5.10389e-11	9.67947e-10
INSIG2	-0.159557	4.84976	5.12828e-11	9.72077e-10
CT62	-0.993276	-0.904092	5.14177e-11	9.74139e-10
NFE2L3	-0.178127	3.26936	5.15145e-11	9.75478e-10
EN1	-0.979788	-0.970954	5.20987e-11	9.86039e-10
NREP	-0.111079	3.05939	5.21838e-11	9.87148e-10
RAB35-AS1	0.114106	2.03472	5.285e-11	9.99243e-10
MKRN5P	0.206559	1.64107	5.29954e-11	1.00148e-09
CIB1	0.126623	5.22332	5.34989e-11	1.00959e-09
DEPDC1	-0.41891	-0.10326	5.35189e-11	1.00959e-09
C6orf163	0.132302	3.72825	5.35203e-11	1.00959e-09
PRTG	-0.84008	0.409499	5.35328e-11	1.00959e-09
RBM28	0.125547	5.27704	5.42873e-11	1.0233e-09
CUL4B	-0.138759	6.25348	5.45805e-11	1.02831e-09
SNORA70I	-0.748586	-2.69675	5.47662e-11	1.03129e-09
ELP6	0.0778735	3.83943	5.49557e-11	1.03433e-09
XYLT1	0.145806	5.90585	5.5539e-11	1.04478e-09
MIB1	-0.146753	6.94222	5.60086e-11	1.05309e-09
DUSP8P5	0.291439	0.970559	5.67786e-11	1.06703e-09
ZNF501	-0.207423	2.23244	5.7014e-11	1.07091e-09
ZNF468	-0.163381	4.48342	5.71231e-11	1.07242e-09
NCAPH2	0.0944186	4.41711	5.72166e-11	1.07363e-09
VWA5B1	-0.887834	0.307976	5.73105e-11	1.07485e-09
AK4P4	0.189527	-0.279602	5.73475e-11	1.07501e-09
NEK6	0.149883	6.02038	5.75209e-11	1.07771e-09
DOCK9-DT	0.178802	0.243568	5.76384e-11	1.079e-09
RNU6-838P	0.199058	1.88741	5.76472e-11	1.079e-09
SOCS2-AS1	0.163365	1.32777	5.7926e-11	1.08367e-09
RPL7	-0.521757	7.82353	5.88637e-11	1.10066e-09
ACTRT2	-1.05224	-2.05146	5.90645e-11	1.10386e-09
CD2AP	-0.16991	5.63481	5.91094e-11	1.10415e-09
HSP90B2P	-0.264935	1.22516	5.93875e-11	1.10879e-09
SEPTIN6	0.115295	6.47119	5.94181e-11	1.1088e-09
FBXO30	-0.190112	5.80947	6.03256e-11	1.12462e-09
UBAP1	0.150898	5.79333	6.03259e-11	1.12462e-09
[truncated: 35,267 more rows]

## Sheet: Mild Stage
ID	logFC	AveExpr	P.Value	adj.P.Val
RNY1	-0.700933	7.60751	0	0
ADGRG7	2.00247	0.0766691	1.06847e-28	1.99088e-24
RNU2-36P	-2.50791	-1.92923	1.19209e-22	1.48081e-18
RNVU1-2A	-0.672751	-1.45987	3.79324e-13	3.53397e-09
CNTNAP3P2	-0.715511	-0.0746232	9.00329e-11	5.76559e-07
LINC02591	0.916587	-1.88587	9.28286e-11	5.76559e-07
FRRS1	-0.292645	3.18983	6.61101e-10	3.51951e-06
KRT79	-0.901604	0.065308	1.64618e-09	7.66831e-06
RN7SL14P	-1.06213	1.60153	1.40738e-08	5.82749e-05
CDC42EP2	0.244869	1.09537	2.78043e-08	0.000103615
TRBV7-6	0.298541	-0.135006	3.29475e-08	0.00011162
OR7E115P	-1.27048	-3.03775	3.80317e-08	0.000118107
TMEM45B	0.245256	3.13397	7.03522e-08	0.000201673
SNORD3C	-1.20866	-0.259987	1.19966e-07	0.000310332
IGLV5-45	-0.544969	-0.731278	1.26575e-07	0.000310332
RN7SL277P	-0.855307	-0.152213	1.3324e-07	0.000310332
IGLV7-43	0.497516	-0.869888	1.71292e-07	0.000364716
RGS1	-0.375336	1.05251	1.76163e-07	0.000364716
SEC24AP1	0.622716	-0.859376	2.13795e-07	0.000419331
GPR82	-0.328323	1.60342	4.60786e-07	0.000858583
SOCS6	-0.169523	2.97833	5.79425e-07	0.000956635
DACH1	-0.201787	2.51346	5.83922e-07	0.000956635
BRD3OS	0.145709	2.08661	5.9042e-07	0.000956635
CLC	-0.414976	6.17733	7.66331e-07	0.00118992
TNNT1	-0.430434	1.3477	9.1425e-07	0.00136282
RPS3AP19	-0.388378	-1.24489	1.31625e-06	0.0018866
KIR3DL1	0.378896	0.720533	1.76224e-06	0.00243228
TFRC	-0.18211	6.65582	2.10437e-06	0.00264582
NCF1	0.188208	7.21097	2.11963e-06	0.00264582
SLA2	0.149797	4.77835	2.16399e-06	0.00264582
PF4V1	0.418362	2.00985	2.20095e-06	0.00264582
CISD2	-0.246818	5.37939	2.57645e-06	0.00297801
CD36	-0.205808	7.41586	2.6371e-06	0.00297801
RN7SL678P	-0.806651	-2.41091	2.72201e-06	0.00298348
RNVU1-32	-0.650155	0.13901	2.96427e-06	0.00315619
ABCA6	0.479776	2.48236	3.96903e-06	0.00410861
IGKV1-9	0.459077	0.037151	4.08062e-06	0.00410996
ACP6	0.120748	4.29762	4.92189e-06	0.00482682
C9orf40	-0.173901	3.20427	5.7569e-06	0.00550094
RNU1-61P	-0.46161	-1.7633	6.05472e-06	0.00564088
EPPK1	0.246363	3.35058	6.48648e-06	0.00589573
ERI2	-0.124535	2.69006	7.10737e-06	0.00628423
SNORD89	-0.522545	3.08484	7.57878e-06	0.00628423
RHOU	-0.148024	4.41109	7.67428e-06	0.00628423
IGKV1D-33	0.687321	-2.78313	7.68507e-06	0.00628423
ECH1	0.126475	3.44872	7.75706e-06	0.00628423
VSTM1	-0.257093	3.03403	8.06243e-06	0.00639265
MTATP6P1	0.425756	-0.271909	9.67722e-06	0.00751315
ALG1L13P	0.177922	4.73654	1.08286e-05	0.00823549
BPGM	-0.293492	7.0631	1.15661e-05	0.00862043
GLYATL2	-0.70906	-1.36429	1.39183e-05	0.0101702
LRRC4	0.157364	5.54493	1.47872e-05	0.0105973
DUSP14	0.132073	1.44638	1.5138e-05	0.010644
TLR8-AS1	-0.434705	-0.772298	1.55195e-05	0.010658
ABHD4	0.120654	4.5189	1.57299e-05	0.010658
TUBA4A	0.116657	6.38999	1.66264e-05	0.0107406
USP12	-0.220979	6.82978	1.66833e-05	0.0107406
SNORD3B-2	-0.660449	3.10978	1.67165e-05	0.0107406
MASTL	-0.144161	3.99597	1.80453e-05	0.0113979
RNA5-8SN1	1.07143	-2.41097	1.89362e-05	0.0117613
RN7SL597P	0.541957	-2.33524	1.99926e-05	0.0122139
CYSLTR2	-0.176685	4.64028	2.05509e-05	0.0123524
LINC01395	0.280929	0.664267	2.11163e-05	0.0124908
CTAG2	-0.970803	-1.90174	2.1903e-05	0.0127537
CCDC144CP	-0.17583	2.49387	2.39123e-05	0.0137095
ZSWIM3	0.10008	1.80209	2.43475e-05	0.0137475
ARMC7	0.125311	2.98754	2.53078e-05	0.0138289
WDFY4	0.181478	7.20699	2.53526e-05	0.0138289
CAMK1	-0.152653	4.2899	2.6128e-05	0.0138289
FAAHP1	0.26665	1.90736	2.63496e-05	0.0138289
VDR	0.158725	3.57668	2.64766e-05	0.0138289
MMP9	0.271996	4.96219	2.69856e-05	0.0138289
BAG3	0.139915	1.85989	2.70892e-05	0.0138289
TRAF3IP2	0.12535	2.39972	2.85528e-05	0.014379
SPNS3	-0.188078	2.76642	3.0276e-05	0.0150435
DSC2	-0.227804	5.58498	3.11923e-05	0.0152798
RNF14	-0.160093	6.41409	3.15716e-05	0.0152798
GPR34	-0.261772	2.38085	3.20383e-05	0.0153069
IL5RA	-0.264086	4.80683	3.30232e-05	0.0155706
CA4	0.184942	3.63261	3.34259e-05	0.0155706
LILRA2	0.137265	6.29024	3.45748e-05	0.015907
JDP2	0.111653	5.20132	3.58464e-05	0.0161526
ARL4A	-0.237359	5.06301	3.59755e-05	0.0161526
NCAPGP1	-0.181725	1.03679	3.75893e-05	0.0165604
MINPP1	-0.155331	3.33375	3.8026e-05	0.0165604
OR7E100P	0.138835	1.2242	3.84529e-05	0.0165604
SELPLG	0.129774	7.37044	3.86613e-05	0.0165604
ASPM	-0.229922	2.70001	4.16456e-05	0.017636
RPS3P6	0.200117	0.59375	4.23474e-05	0.0177316
MYB	-0.1304	3.18861	4.3364e-05	0.0177634
TRBV20-1	0.166728	2.7287	4.33766e-05	0.0177634
OLIG2	-0.305711	2.02822	4.39576e-05	0.0178057
PDCD4-AS1	0.137283	2.14935	4.53802e-05	0.0181843
CDC42BPA	-0.211776	3.70349	4.59212e-05	0.0182053
LINC00623	0.145922	3.75108	4.75234e-05	0.0186422
IFIT1B	-0.296214	5.10926	5.0531e-05	0.0196155
RN7SL692P	-0.857026	-2.05851	5.2748e-05	0.020265
GPX3	0.27722	0.0911252	5.40096e-05	0.020538
SNAI3	0.129924	2.72841	5.72787e-05	0.0215611
PAQR7	0.124	2.99518	5.99831e-05	0.0223533
SNTB1	-0.0862162	5.26079	6.10334e-05	0.0225195
P2RX1	0.185164	4.78563	6.27908e-05	0.0229205
CHMP3-AS1	-0.250385	0.540853	6.3831e-05	0.0229205
PLBD1-AS1	0.152478	2.68859	6.42414e-05	0.0229205
SPECC1	-0.166522	7.41288	6.45804e-05	0.0229205
DCLRE1CP1	-0.62748	-2.32065	6.82916e-05	0.024009
INPP1	-0.0949049	3.4296	7.1743e-05	0.0249867
INSL3	0.293426	-0.86642	7.30885e-05	0.0252196
RNA5-8SN2	0.708038	-2.37947	7.45011e-05	0.0252546
UNC119B	0.0844695	4.6716	7.45803e-05	0.0252546
SIGLEC8	-0.301034	2.2823	7.52231e-05	0.0252546
MATN1-AS1	0.148968	1.89479	7.91409e-05	0.0258714
GTF2IRD2	0.156851	2.7219	7.93161e-05	0.0258714
RNU1-28P	-0.77483	1.05768	7.97725e-05	0.0258714
LAIR2	0.244122	1.45091	7.98371e-05	0.0258714
IGHV3-13	0.304924	-0.920254	8.18717e-05	0.026302
RPL41P5	-0.320629	-0.358623	8.35303e-05	0.0266055
TMEM158	0.406086	0.985375	8.47518e-05	0.0267658
SLC30A1	-0.205626	5.36683	8.60704e-05	0.0269538
TPST1	0.211337	4.22324	8.69791e-05	0.0270114
ZNF124	-0.122249	3.81929	8.80583e-05	0.0271205
MT-ATP8	0.321346	0.209096	9.05892e-05	0.0275076
CLPP	0.091587	3.18846	9.07915e-05	0.0275076
RNU5F-1	-0.314617	-0.188179	9.50782e-05	0.0283631
CRYBG3	-0.115379	5.38534	9.51375e-05	0.0283631
ARL6IP1	-0.152662	6.66833	9.6055e-05	0.028364
TRGV4	-0.380636	0.674117	9.70121e-05	0.028364
XPO1	-0.109386	7.52841	9.74236e-05	0.028364
BNIP3L	-0.222631	10.4291	9.9616e-05	0.028589
PLOD1	0.135412	4.48302	9.97307e-05	0.028589
PARPBP	-0.147078	2.33705	0.000102617	0.0291918
CD101	-0.158365	4.45288	0.000104275	0.0294388
LEPR	-0.193095	3.86872	0.000107883	0.0301502
ADGRE4P	-0.227952	4.72946	0.000108413	0.0301502
SNX3	-0.176374	7.18095	0.000109808	0.0302248
RNVU1-4	0.165181	1.15665	0.000110304	0.0302248
DEFA1B	-1.39646	-3.16514	0.000113986	0.0305261
LGALS2	-0.307405	4.06137	0.000114686	0.0305261
GOLIM4	-0.0918313	4.04212	0.000115104	0.0305261
NECTIN2	0.445473	1.5906	0.000115462	0.0305261
RPL9	-0.334398	7.40132	0.000115965	0.0305261
CLIC2	-0.194891	3.14127	0.000117657	0.0305261
SLC35A2	0.0823075	2.8788	0.000118413	0.0305261
LINC02506	-0.595767	-1.10745	0.000118456	0.0305261
FRG1DP	0.368996	0.128831	0.000118775	0.0305261
PLSCR4	-0.238365	0.477754	0.000122125	0.031008
FSD1L	-0.154129	3.46616	0.000122315	0.031008
HLA-F-AS1	0.130763	3.00217	0.000126854	0.0314524
GEMIN4	0.0776014	3.99926	0.000127343	0.0314524
FMOD	0.856586	-0.693061	0.000128616	0.0314524
KRT77	-0.71208	0.23252	0.000128692	0.0314524
SLITRK4	-0.175946	2.41627	0.00012887	0.0314524
MAP1LC3A	0.163157	1.60659	0.000129132	0.0314524
MPP7-DT	-0.26225	-1.00551	0.000130055	0.0314717
SLC35A4	0.140558	3.11527	0.000133963	0.0321817
CRISPLD2	0.18754	6.74253	0.000135884	0.0321817
PSPN	0.131742	1.16094	0.000135978	0.0321817
ADGRE1	-0.180736	5.58716	0.000137771	0.0321817
CA3-AS1	-0.248853	0.772815	0.000137833	0.0321817
BARD1	-0.130427	4.23848	0.000138171	0.0321817
JCHAIN	-0.400651	5.81651	0.000139575	0.0323067
TRBV4-2	0.25258	0.679769	0.000144358	0.0332076
RNU6-917P	-0.191946	-0.418053	0.000146496	0.0334929
PSMA6P1	-0.319371	-1.57824	0.000149505	0.0338231
TFEC	-0.225434	5.87518	0.000149756	0.0338231
NOB1	0.0875342	2.43989	0.00015302	0.0341493
RPS15AP38	-0.35604	-1.03396	0.000153033	0.0341493
PHACTR1	0.152252	4.02748	0.000154903	0.0343609
MIR1244-2	-0.219322	-0.458542	0.000159609	0.0351952
GZMAP1	-0.210595	-0.822331	0.000163473	0.035578
IER3	0.147783	1.99231	0.000164084	0.035578
MYOM1	0.127949	3.10508	0.000164305	0.035578
IGKV1-33	0.427983	-2.02243	0.000165196	0.035578
KCTD12	-0.13563	6.86773	0.000166118	0.035578
SMPD3	-0.291284	3.16568	0.000167153	0.0355951
APOBEC3B	0.480003	1.0921	0.000168573	0.0356935
RAP1GAP	-0.53986	2.70421	0.000171274	0.035914
IDO1	-0.306696	2.8892	0.000173308	0.035914
RNU1-83P	0.543943	-0.394769	0.000173868	0.035914
RNU5B-1	-0.569582	0.623512	0.000173964	0.035914
ADORA3	-0.239552	1.34342	0.000174433	0.035914
DUSP22	0.0732498	6.39359	0.000175764	0.0359891
MAP4K5	-0.10294	5.88195	0.000177536	0.0360814
DCK	-0.133383	6.17097	0.000178909	0.0360814
RERE-AS1	0.132183	2.0874	0.000179119	0.0360814
LINC02762	0.111478	3.26145	0.000180388	0.0361416
DCUN1D1	-0.169773	7.29682	0.000183516	0.0365716
MTG2	0.122146	4.45221	0.000188123	0.0372903
HNMT	-0.156935	4.0325	0.000189432	0.0372962
LPAR1	-0.175147	3.45483	0.000190725	0.0372962
RNF185	0.0795375	4.9398	0.000192035	0.0372962
ITPRIP	0.116013	6.90577	0.000192155	0.0372962
NUDT4	-0.150087	6.69648	0.000195149	0.0373946
IGLV7-46	-0.418018	-0.549099	0.000195355	0.0373946
MIR142HG	0.112605	6.14285	0.000195673	0.0373946
TRBV7-7	0.300567	-1.87937	0.000199704	0.0379534
RN7SL364P	0.146921	-0.0584789	0.000200634	0.0379534
ZNF658	-0.167826	2.50756	0.000202691	0.0381489
RPL21P90	0.187084	-1.24659	0.000205727	0.0384541
CDK5R1	0.139517	4.30818	0.000206376	0.0384541
RN7SL622P	0.497982	-1.94453	0.000220624	0.0409043
NFRKB	0.095276	5.10029	0.000223056	0.0411506
ANKRD36BP2	-0.326842	4.87137	0.000225026	0.0413095
LTB4R	0.114596	5.74199	0.000227674	0.041399
NDST1	0.176523	5.89505	0.000228293	0.041399
IGHV7-4-1	0.515995	-1.58398	0.0002297	0.041399
RPS3AP2	-0.187444	-0.748466	0.000229958	0.041399
TRAV3	0.157391	0.820441	0.000238044	0.0426488
SORD	-0.132475	3.55275	0.000239847	0.0427662
GLRX5P1	-0.443439	-2.39825	0.000242334	0.042867
RPL31	-0.347823	6.6578	0.000244744	0.042867
ABCB10	-0.116664	5.7051	0.000246962	0.042867
SUCLG2-DT	0.133789	1.63465	0.000247226	0.042867
HRH4	-0.224944	4.05317	0.000247262	0.042867
CENPBD2P	0.103723	3.65347	0.000247589	0.042867
RPS15A	-0.265513	7.49817	0.000248464	0.042867
RIOK3	-0.190424	8.6134	0.000250624	0.0428852
RPS15AP12	-0.258263	-1.65565	0.000250871	0.0428852
RPS3AP49	-0.467456	-1.72419	0.000254624	0.043328
PLK4	-0.152551	1.57717	0.000256748	0.0433987
GYPA	-0.27772	3.48808	0.000257369	0.0433987
SORL1-AS1	0.127773	3.78218	0.000259305	0.0435281
SDHC	0.0652408	5.93267	0.000261596	0.0437158
DDX39B-AS1	-0.190597	-1.00718	0.000262778	0.0437174
HLX	0.123032	4.25492	0.000264211	0.0437604
WASL-DT	-0.138124	0.990092	0.000265883	0.0438306
CD2AP	-0.133744	5.63481	0.000266987	0.0438306
TUBB4BP2	0.141459	0.586173	0.000268919	0.0439541
RBM44	-0.136241	2.70726	0.000270684	0.0440493
CACNG6	-0.27383	0.825828	0.000272299	0.0440775
SNORD3B-1	-0.48639	0.704959	0.000273222	0.0440775
RAB8A	0.0886178	5.59667	0.000277542	0.0444286
TRBV1	0.187421	-1.08281	0.000277783	0.0444286
KDM2B-DT	0.116184	0.928581	0.000281039	0.0447572
ATP6V1E2	0.0795824	2.82882	0.000282443	0.0447895
MYCT1	-0.170715	1.47039	0.000285985	0.0450693
RN7SL32P	0.265912	-0.619498	0.000287306	0.0450693
LINC00243	0.131568	3.86238	0.000288828	0.0450693
MIR548AY	0.241421	-1.55712	0.000289045	0.0450693
ARSG	0.104538	6.01528	0.000291222	0.0452195
LIPC-AS1	0.217793	0.673725	0.000292573	0.0452408
ALOX5AP	0.135932	6.97604	0.000294404	0.0453357
NIPSNAP3A	-0.160657	3.79465	0.000296889	0.0454124
RPS19P3	0.0818863	1.89143	0.000297879	0.0454124
PITHD1	-0.22423	7.28376	0.000298557	0.0454124
IMPACT	-0.101785	4.1878	0.000309887	0.0469441
IL1RL1	-0.257667	4.15024	0.000312055	0.0470811
PILRB	0.191427	4.12307	0.000317547	0.0477166
CAPS	0.106359	3.76237	0.000322074	0.048008
PLA2R1	0.597615	0.0020745	0.000323293	0.048008
IGKV1D-8	0.327851	-1.77414	0.000323351	0.048008
RPL7AP75	-0.204408	-0.677496	0.000325539	0.0481411
CEBPE	-0.179823	2.26188	0.000328672	0.0482948
RNU1-18P	-0.867525	-1.96351	0.000330256	0.0482948
THBD	0.157266	5.01711	0.000330467	0.0482948
SCOC	-0.209168	3.50106	0.000332472	0.048398
GCLC	-0.110984	5.5401	0.000336319	0.0485963
ZNG1DP	-0.189791	0.846	0.000336442	0.0485963
COMMD8	-0.258243	3.38197	0.000340865	0.0487885
DUSP1	0.137495	8.55734	0.000341672	0.0487885
USP32P3	-0.130207	1.53151	0.0003417	0.0487885
NDUFA4	-0.20665	4.78153	0.000343496	0.0488442
CD24	-0.211029	4.37549	0.000345697	0.0488442
RFK	-0.120598	3.87391	0.000346022	0.0488442
RPL26	-0.358478	4.84049	0.000351047	0.0493665
FXN	0.0782355	3.53292	0.000359827	0.050411
RPL39	-0.342509	6.0682	0.00036252	0.0504939
ERAP2	-0.162885	6.86143	0.000363129	0.0504939
MMADHCP2	-0.199699	0.0497446	0.000365613	0.0505463
AMD1P3	0.164197	-1.00417	0.000366219	0.0505463
KNL1	-0.182255	3.12982	0.000367861	0.0505856
SEMA4F	0.0819806	3.56895	0.000371906	0.0509539
GNLY	0.216892	6.39469	0.000375396	0.0511422
SIGLEC9	0.119457	5.79396	0.000376383	0.0511422
MCPH1-DT	-0.0943235	1.83552	0.000377398	0.0511422
SQLE	-0.0990573	2.90691	0.000380125	0.0512999
TMEM256	-0.193797	2.28092	0.000381315	0.0512999
PLAUR	0.111995	5.71366	0.000384606	0.0515566
RNU6-1004P	0.291798	-2.29884	0.000389258	0.0519932
MT-RNR2	0.445389	6.25009	0.000396523	0.0527744
PFDN5	-0.229452	6.14366	0.000399167	0.0527994
RN7SL126P	-0.714699	-1.86048	0.000399545	0.0527994
RNU1-29P	-0.897759	-1.07703	0.000401579	0.0528232
CCDC86-AS1	-0.235389	-0.418744	0.00040256	0.0528232
TRBV11-2	0.203916	0.424376	0.000408972	0.0534764
TNFRSF17	-0.313225	0.335695	0.000411815	0.0535898
TREML2	0.111115	5.86942	0.000412716	0.0535898
CDC27	-0.097593	6.66989	0.000422574	0.0546793
FAM124B	-0.135161	1.61503	0.000436707	0.0563126
ASB2	-0.170299	2.14717	0.000441142	0.0564739
BLOC1S6	-0.11959	6.38504	0.00044247	0.0564739
RBM23	0.0831707	7.21687	0.000442747	0.0564739
H4C13	-0.238801	4.34003	0.000445083	0.0564739
POLE2	-0.246623	2.30012	0.000445535	0.0564739
CXCR1	0.130476	8.24659	0.000452992	0.0570339
JAZF1	-0.150505	6.08016	0.000453051	0.0570339
TRANK1	0.11441	8.83326	0.000454545	0.0570339
ZNG1F	-0.132532	4.27058	0.00045789	0.0572608
CDK6	-0.0940039	6.39505	0.000465376	0.0574173
PPP1R12B	0.129459	7.7255	0.00046856	0.0574173
TBC1D30	0.111354	3.05426	0.00047231	0.0574173
IGLV1-47	-0.322765	0.307138	0.000472581	0.0574173
PRR13P2	0.282081	-1.95793	0.000474315	0.0574173
LINC01278	0.0887484	2.72158	0.000475009	0.0574173
ABTB3	0.104425	4.41731	0.000477676	0.0574173
IFNG	-0.269443	0.409059	0.000479171	0.0574173
AP1S2	-0.190175	6.7423	0.000479298	0.0574173
GAPT	-0.167846	5.47012	0.000479382	0.0574173
RNU1-27P	-0.818025	2.2764	0.000479657	0.0574173
SCART1	0.179118	3.7525	0.00048037	0.0574173
IFITM3P1	0.336455	-1.53655	0.000480585	0.0574173
B4GALT6	-0.153677	1.94565	0.000482071	0.0574173
DNAJC30	0.106538	1.76873	0.000483472	0.0574173
GPR160P1	0.317537	-0.687787	0.000483793	0.0574173
ORAI1	0.101657	4.09091	0.000487526	0.0576767
CRISP2	-0.384972	-1.22072	0.000498568	0.0586422
SNCA	-0.219499	10.4119	0.000498835	0.0586422
RNU5E-4P	-0.442331	-2.45295	0.000505372	0.0592239
SULT1A2	0.233093	0.512843	0.000513955	0.0599764
SECTM1	0.15193	5.96195	0.000515012	0.0599764
RBBP8	-0.137374	3.34271	0.000525938	0.0610579
COX7B	-0.161838	3.88339	0.000528235	0.0611342
HIGD2A	0.118369	4.43345	0.000536305	0.0618759
COL9A3	0.230791	3.0677	0.000543031	0.0624332
INKA2	0.116592	3.81987	0.000544486	0.0624332
LMTK2	0.107257	6.21351	0.000547932	0.0624612
SEMA7A	-0.13989	3.40225	0.000548082	0.0624612
LSM10	0.086885	3.99188	0.000556064	0.0631777
KCTD3	-0.0975462	3.06361	0.000560442	0.0634815
GFOD3P	0.105811	3.42415	0.000565466	0.0638565
NPIPB8	0.350794	-1.25018	0.000571791	0.0643757
TMSB10P1	0.494634	-1.50131	0.000573985	0.0644281
DDX11L17	0.350265	-0.970113	0.00057821	0.0646514
MIR4748	0.262754	-1.90175	0.000579444	0.0646514
WAKMAR2	0.104958	3.4359	0.000583228	0.0647827
USP32P2	0.346118	-0.0833483	0.000584098	0.0647827
PLA2G4A	-0.126999	3.42449	0.00058592	0.064792
SLC2A14	0.324549	0.907398	0.000595703	0.0656789
LGALS9	0.172466	3.98117	0.000597771	0.0657125
SHLD3	-0.17159	2.17943	0.000605044	0.0661369
HCG27	0.104385	7.78568	0.0006065	0.0661369
LETM2	0.100781	3.02925	0.000606956	0.0661369
GAS5	-0.183917	5.32351	0.000609	0.0661661
MIR3648-1	0.309111	4.68302	0.000611971	0.0662957
P2RY1	-0.125908	2.8432	0.000614664	0.0663744
CCDC71	0.0757933	4.02975	0.00061626	0.0663744
C1DP5	-0.185145	0.0759031	0.00062199	0.0667582
RPS3A	-0.344928	7.58726	0.000623406	0.0667582
TNFAIP1	0.0753643	3.86716	0.000634506	0.0675637
PHF13	0.076283	3.11332	0.000636803	0.0675637
STS	0.0897519	3.22775	0.000638254	0.0675637
IFI44L	-0.4361	6.392	0.000641023	0.0675637
SLC22A16	-0.16948	1.9441	0.00064161	0.0675637
FCAR	0.130525	5.37665	0.000641806	0.0675637
GLIPR1-AS1	0.115181	0.456636	0.000643716	0.0675739
MXI1	-0.18606	7.96952	0.000648989	0.067936
LINC02273	0.184784	1.93682	0.000657113	0.0684163
CTNNAL1	-0.220895	2.9595	0.000659642	0.0684163
THAP4	0.0939285	2.68031	0.000662709	0.0684163
PCDHGA9	0.184496	0.372107	0.000666696	0.0684163
TRAK2	-0.142408	7.53259	0.000666939	0.0684163
TIMP1	0.145662	3.63606	0.000667189	0.0684163
RPL21P28	-0.307901	0.910026	0.000668578	0.0684163
YOD1	-0.215235	8.74306	0.000669006	0.0684163
RAB6A	-0.0927941	6.73349	0.0006701	0.0684163
COMMD3	-0.136898	3.35605	0.000672898	0.0685143
ZC3H12C	-0.121765	2.85321	0.000677044	0.068631
TRAPPC5	0.0825728	4.38767	0.000678093	0.068631
TLCD4	-0.199483	4.33144	0.00067957	0.068631
GATD3	0.451834	1.54869	0.000683324	0.0687548
CUTA	0.0848557	3.59771	0.000684486	0.0687548
COPS2	-0.172939	5.41371	0.000692251	0.0691688
FKBP1B	-0.176191	1.4612	0.000692319	0.0691688
XK	-0.232204	6.1143	0.000694175	0.0691688
GAS2L3	-0.146753	1.61054	0.000697012	0.0692663
HMOX2	0.0660112	5.027	0.00070256	0.0696319
RHBDD1	-0.0905712	5.84505	0.000716926	0.0708673
LINC01504	-0.110487	3.18425	0.000739393	0.0728947
DLAT	-0.0594875	3.71305	0.000743752	0.0729065
CHPT1	-0.133976	6.36061	0.000745241	0.0729065
FAM222B	0.124152	2.04414	0.000746701	0.0729065
H3P4	-0.303714	-1.1835	0.000747338	0.0729065
C17orf67	0.0696678	3.07856	0.000750691	0.0729154
RHOBTB3	-0.136469	4.11418	0.000751353	0.0729154
POC1B	-0.0947234	5.46887	0.000753299	0.0729154
LNPK	-0.110825	5.72025	0.000756107	0.0729976
RBISP4	0.186937	-1.1895	0.000765725	0.0737352
RHAG	-0.211077	2.2492	0.000782215	0.075129
TRBV10-1	-0.456854	-2.4454	0.000784713	0.0751751
IFITM3	0.301356	3.15017	0.000793681	0.0757634
RNU1-88P	-0.631041	-0.556642	0.00079492	0.0757634
RNY3	-0.586038	4.6262	0.000807175	0.0767351
ASRGL1	-0.106925	3.2143	0.000815718	0.07735
PGM2L1	-0.115625	4.44228	0.000818883	0.077453
RNASE3	-0.334876	0.53698	0.000824346	0.0776362
LITAF	0.111924	9.04159	0.000824986	0.0776362
GADD45A	-0.110584	3.37165	0.000827655	0.0776912
GFUS	-0.175954	4.83335	0.000834018	0.0777135
PGLYRP1	0.175939	1.97068	0.000838111	0.0777135
AMER1	0.0771748	3.25985	0.000840504	0.0777135
ZNF785	0.113619	3.02709	0.00084239	0.0777135
HYPK	0.0794795	3.59764	0.000842419	0.0777135
MAGEE1	0.090455	1.57093	0.000843423	0.0777135
SPTSSA	-0.121549	3.22482	0.000843667	0.0777135
BORCS7	-0.152005	3.63554	0.000844576	0.0777135
SESN3	-0.136822	8.67887	0.000848107	0.0777239
SNORD73B	-0.117016	-0.0575507	0.00084974	0.0777239
ISCA1	-0.167716	6.64007	0.000854844	0.0777239
TMEM179B	0.0841982	3.29292	0.000856912	0.0777239
MGST1	-0.109987	2.54614	0.000858892	0.0777239
MBNL3	-0.194904	9.40467	0.000860261	0.0777239
SNORA13	-0.389123	-0.968179	0.000861003	0.0777239
PPP1CB	-0.155691	8.20659	0.000861374	0.0777239
RAD51AP1	-0.170272	0.792601	0.00086507	0.0778671
RPIA	-0.158847	6.21116	0.00086714	0.0778671
SIK2	0.0648289	4.59757	0.000871459	0.0780668
RNU6-828P	0.196608	-0.919372	0.000879052	0.0783717
NRAS	-0.101033	5.76056	0.000879069	0.0783717
AGGF1P2	-0.312617	0.589665	0.000882204	0.0784635
COMMD6	-0.279141	3.24136	0.000885835	0.0785989
MIR16-1	-0.22808	-0.819885	0.000889085	0.0786556
NTAN1	-0.106965	3.96233	0.000890695	0.0786556
ATP6V1G2	0.109707	0.685739	0.000892974	0.0786704
GPRC5D-AS1	0.314985	1.12925	0.000897761	0.0787604
BMS1P7	-0.238304	-0.117713	0.000898337	0.0787604
SOX6	-0.187076	4.95143	0.000901765	0.0787604
UGGT2	-0.134151	3.40638	0.000902449	0.0787604
RHOA-IT1	0.131402	1.75568	0.000905876	0.0788747
RIMBP3	0.129773	1.26642	0.000914936	0.0791551
CXCR2	0.141038	8.34261	0.000916738	0.0791551
PCDHGB4	0.195226	-0.0721655	0.000917085	0.0791551
PCDHGB3	0.161465	0.945458	0.000917593	0.0791551
KCTD21	0.0931168	3.25507	0.000921081	0.0792251
CNNM3	0.10405	4.57081	0.000922655	0.0792251
IGHV3-64D	-0.414469	-1.08509	0.00092575	0.079308
RFFL	0.0826712	6.62815	0.000957415	0.0818326
RAB43	0.0884558	3.87933	0.000963428	0.0821521
IRAK2	0.0869977	3.01579	0.00096711	0.0821521
SGO2	-0.18457	1.89497	0.000970002	0.0821521
PLAAT5	-0.240369	0.671825	0.000970389	0.0821521
PIK3R5-DT	0.123962	0.384745	0.000972175	0.0821521
TMEM127	0.118827	6.56279	0.000997818	0.0841282
RN7SL33P	-0.610174	-1.7736	0.00101086	0.0850353
SLC7A5P1	0.0944279	1.67314	0.00101463	0.0851603
MT-ND1	0.267967	3.70329	0.00102156	0.0855495
SNRK-AS1	0.0966941	1.41258	0.00102445	0.0855991
IL1R2	0.13393	6.56853	0.00102878	0.0857684
TRBV10-3	0.189577	0.706177	0.00103262	0.0858037
XPC-AS1	0.110274	4.89132	0.00103573	0.0858037
CENPI	-0.133538	1.73488	0.00103838	0.0858037
IGLV9-49	0.595737	-1.38574	0.00103841	0.0858037
OR2L1P	-0.240408	-0.895727	0.0010443	0.0859906
AKR1B1	0.0638534	3.85299	0.0010474	0.0859906
ZUP1	-0.108837	3.98667	0.0010476	0.0859906
LRRC25	0.13103	5.72105	0.00105343	0.0862505
TECR	0.104706	3.09009	0.00105539	0.0862505
ZNF724	-0.094221	1.37474	0.00106001	0.0864385
TMEM79	0.101965	1.56203	0.00106891	0.0869368
GATD1	0.120627	3.60101	0.00107079	0.0869368
RHOF	0.117	4.35461	0.0010803	0.0874531
CITED4	0.164802	0.462815	0.00108184	0.0874531
PCDHGB2	0.174558	0.280977	0.00109487	0.0883147
RGL4	0.115569	4.59087	0.00110151	0.0886586
EFNA4	0.0748709	2.05973	0.00110428	0.0886895
H2BC6-AS1	0.104942	1.62576	0.00110842	0.0888312
ATP5MK	-0.137636	4.24475	0.00111567	0.08922
NAA30	-0.0963252	5.28998	0.0011188	0.0892786
IGLV3-1	0.286573	1.48383	0.00112451	0.0894774
TRMT2B-AS1	0.271924	-1.33902	0.00112771	0.0894774
IGLV3-25	0.359769	1.00699	0.00112849	0.0894774
HLA-DRB5	-0.369696	5.72075	0.00113335	0.0895839
SLC25A37	-0.150385	11.4296	0.00113528	0.0895839
LGALS9C	0.254283	0.583293	0.00114019	0.0895839
SIDT1	0.0823851	5.92862	0.00114039	0.0895839
RSL24D1	-0.254262	5.08504	0.00114308	0.0895839
ITGAV	-0.0968014	5.0046	0.00114593	0.0895839
AP5B1	0.144109	6.54643	0.00114666	0.0895839
MTND5P32	0.216416	2.64317	0.00115244	0.0896948
FCHO1	0.103372	5.32728	0.0011529	0.0896948
TEX12	-0.167324	-0.956412	0.00116331	0.0902547
BIRC2	-0.138362	7.37703	0.00116494	0.0902547
ACAA2P1	-0.191482	-0.17741	0.00117164	0.0905855
KLRC2	0.307737	2.70105	0.00117884	0.0906093
ZNF597	-0.090102	3.84825	0.00117901	0.0906093
BRIP1	-0.119245	3.06289	0.00117924	0.0906093
ORAI2	0.10715	6.9674	0.00118372	0.0907517
NEDD9	0.0988909	7.73739	0.00118939	0.0907517
RNU1-42P	0.756425	-2.73051	0.00118997	0.0907517
TRAV8-3	0.106757	2.23334	0.00119383	0.0907517
VPS26AP1	0.15534	-0.432241	0.00119536	0.0907517
TIGD3	0.132874	2.42121	0.0011957	0.0907517
NEIL3	-0.253925	3.33507	0.00120277	0.0909531
MAP10	-0.13563	1.99648	0.00120324	0.0909531
COX7C	-0.214463	5.15058	0.00120872	0.0911822
ORM1	0.285128	1.69104	0.00122982	0.0924026
IP6K1	0.104402	5.81174	0.00122985	0.0924026
C12orf42	0.101373	3.18364	0.0012355	0.0926398
RFESD	-0.122495	2.60382	0.00124332	0.0929797
ALDOC	0.118363	1.16152	0.00124543	0.0929797
SMAD5	-0.107232	5.68823	0.00124751	0.0929797
LINC00892	-0.15983	0.972299	0.00125227	0.0931477
GLRX5	-0.206504	7.5296	0.00125587	0.0932294
MTARC1	0.128164	5.57514	0.00126481	0.0936083
AOPEP	0.0801365	4.60586	0.001266	0.0936083
PRSS33	-0.276596	1.84987	0.00126981	0.0937045
MRPL10	0.0773334	3.06166	0.00127416	0.0938397
MPIG6B	0.299796	1.19092	0.00127966	0.0940589
SNORD15B	-0.42402	3.69903	0.00128639	0.0940741
HAVCR1	0.129096	1.60261	0.00129188	0.0940741
AQP1	-0.209048	1.59916	0.00129265	0.0940741
DPF2	0.0866235	5.09671	0.0012945	0.0940741
SERF1B	0.133136	0.759716	0.00129903	0.0940741
ERGIC1	0.100817	7.60124	0.00130468	0.0940741
CTSA	0.134178	4.81726	0.0013059	0.0940741
PTPRO	-0.120276	4.05544	0.00131028	0.0940741
KIAA2013	0.0800021	5.37762	0.00131302	0.0940741
JSRP1	-0.151418	1.9884	0.00131399	0.0940741
ASF1B	0.162692	1.19921	0.00131629	0.0940741
CTSG	-0.338503	0.55034	0.00131635	0.0940741
LINC00937	0.194571	3.30551	0.00131774	0.0940741
LRRC61	0.0965478	2.17959	0.00131821	0.0940741
ANAPC10	-0.0914166	2.61836	0.00131944	0.0940741
NCF1C	0.121939	6.08902	0.00132026	0.0940741
CASP3	-0.148973	5.2791	0.00133351	0.0948371
C2orf69	-0.117744	3.77604	0.00133927	0.0949548
SLC44A2	0.130637	6.92507	0.00134365	0.0949548
CXCL16	0.131535	4.32464	0.00134441	0.0949548
SLC30A8	-0.530457	-0.901897	0.00134574	0.0949548
SNORA53	-0.284318	4.34459	0.00135444	0.0949548
CMAS	-0.114948	4.18969	0.00135567	0.0949548
H2AL1MP	-0.355135	-2.57697	0.00135604	0.0949548
SMIM3	0.0952157	3.60415	0.00135794	0.0949548
CCDC92	0.0664476	4.29826	0.00135881	0.0949548
PADI4	0.156471	5.92527	0.00136075	0.0949548
TANC2	0.0876932	5.67841	0.00136319	0.0949548
GATD1-DT	0.0834332	2.20392	0.0013666	0.0950144
ITGA4	-0.11252	8.77228	0.00137816	0.09564
YIPF3	0.113742	4.03422	0.00138408	0.0958718
FITM2	0.0840351	3.10715	0.00138994	0.0960995
LIPA	-0.109485	5.79681	0.00139728	0.0962918
CCNJ	-0.0621674	4.03708	0.00140046	0.0962918
TPT1	-0.209257	8.61786	0.00140078	0.0962918
RNU6-761P	0.277503	1.24764	0.00140633	0.0962918
ESPN	0.293426	2.90954	0.00140778	0.0962918
BLOC1S2	-0.140996	4.43558	0.00140823	0.0962918
MAOA	-0.304494	1.06618	0.00141225	0.0963903
RALGAPA1P1	-0.128916	1.99332	0.00141864	0.0966493
SRRD	-0.133333	5.08771	0.00142535	0.0966893
RPL31P2	-0.459555	-2.16039	0.00142592	0.0966893
EVI2A	-0.290518	5.96406	0.00142701	0.0966893
GDPGP1	0.101671	1.45039	0.00143381	0.0969733
JTB	-0.10669	4.38473	0.00143663	0.0969881
RPL11P1	0.172576	-0.637612	0.00144349	0.0972748
VAMP1	0.0900903	5.18806	0.00145611	0.0978886
TRPC6	-0.227016	1.50775	0.00146061	0.0978886
TWSG1	-0.102029	3.42557	0.00146075	0.0978886
AIDA	-0.104492	5.64043	0.0014631	0.0978886
ZNF273	-0.118025	3.50816	0.00146893	0.0981025
PPM1A	-0.126005	8.33533	0.00147307	0.09811
STARD10	0.130299	2.21215	0.00147646	0.09811
SKA3	-0.232517	1.85988	0.00147694	0.09811
ACKR3	0.079021	2.25353	0.00148018	0.09815
SNORD116-13	-0.207336	0.654485	0.00148346	0.0981927
PIGC	-0.177774	5.69644	0.00148696	0.0982504
RPL7P47	-0.404736	-2.12364	0.00149049	0.098309
KRT1	-0.28802	5.5959	0.00149728	0.0985824
RPS7	-0.258308	6.46979	0.00150795	0.0991096
HMGCS1	-0.0852668	4.66316	0.00151087	0.0991272
ATP5PO	-0.111894	3.89577	0.0015149	0.0992165
RPS6KB2-AS1	0.1278	0.859948	0.00151879	0.0992864
TMEM9B	-0.0885661	5.49299	0.00152373	0.0992864
DPY19L1P1	-0.180768	2.95225	0.00152396	0.0992864
RPS14P5	0.18408	0.165746	0.00153237	0.0996605
POLR3K	0.0641629	2.83182	0.00153934	0.0996858
SLC35A1	-0.162671	2.79028	0.00153957	0.0996858
SESN2	0.11364	2.75108	0.00154079	0.0996858
MLF2	0.0813021	5.52263	0.00154733	0.0998747
TSEN34	0.0848648	6.2904	0.00154907	0.0998747
SIGLEC5	0.154932	1.56773	0.00155405	0.100023
B4GALT1	0.0943325	6.1021	0.00155931	0.100188
CYP7B1	-0.206909	0.242602	0.0015623	0.100208
POLR2M	-0.128621	4.49003	0.00156612	0.10028
AFDN	0.156132	4.86265	0.00157421	0.100346
CARD9	-0.103677	4.63795	0.00157699	0.100346
PMS2P5	0.167926	0.157418	0.0015776	0.100346
PWP2	0.348885	1.77935	0.00157846	0.100346
UNC119	0.0797539	5.82063	0.00158268	0.100346
RN7SL48P	0.316735	-1.96057	0.00158549	0.100346
MRPS16	-0.0645474	5.6054	0.001586	0.100346
STMP1	-0.128766	5.83444	0.00159263	0.100454
SWT1	-0.169989	4.88644	0.00159309	0.100454
CNNM2	0.073371	4.11407	0.0016049	0.101028
CUL4A	-0.0685587	6.80251	0.00161437	0.101452
SNX16	-0.163134	3.98132	0.00162188	0.101752
AZI2	-0.152417	4.95335	0.00163857	0.102627
SHISA5	0.109047	6.23853	0.00164669	0.102962
PFN2	0.134172	1.79128	0.00165167	0.103101
PITPNA	0.0959019	6.20077	0.0016592	0.103397
EIF4EBP3	0.129801	-0.0275473	0.00166806	0.103626
PLP2	0.109494	4.80828	0.00166843	0.103626
MMUT	-0.10158	4.21489	0.001674	0.103799
TACC3	0.120045	5.91409	0.00167865	0.103914
APBA3	0.0755132	3.86193	0.00168469	0.104116
C2orf76	-0.0827197	2.46672	0.00171481	0.105802
ZNF593	-0.104638	1.23105	0.00171941	0.10591
PTGDR2	-0.180311	3.97125	0.00173264	0.106549
FUNDC2	-0.100795	4.81834	0.00173766	0.106681
PTRHD1	-0.124317	3.02794	0.00174538	0.106743
MTCYBP23	0.199795	2.21855	0.00174647	0.106743
OR2W6P	0.17195	-0.730179	0.00174725	0.106743
SPTA1	-0.188925	4.03056	0.00175876	0.10727
BANF1	0.116917	2.12738	0.00176528	0.107492
CDC42	0.061069	4.84556	0.00177121	0.107677
AP5S1	0.0734172	3.03001	0.00177647	0.107821
RN7SL736P	-0.461791	-1.12397	0.0017824	0.108005
MTND3P12	0.167577	1.4718	0.00178534	0.108007
CR1L	-0.17617	3.73988	0.00178925	0.108069
UNG	0.0644642	3.24693	0.00179314	0.108128
RPS15AP1	-0.260354	-0.412491	0.00180209	0.108492
ZDHHC20	-0.114159	7.35944	0.00180917	0.108743
POLR2K	-0.231222	2.99532	0.00182121	0.10926
EXTL2	-0.0874481	2.40204	0.00182364	0.10926
CBX3P10	0.117762	2.65447	0.00183016	0.109294
CERS2	0.074301	6.3819	0.00183656	0.109294
NFE2L3	-0.119474	3.26936	0.00184516	0.109294
SNX27	0.102511	7.13124	0.00185059	0.109294
RNVU1-28	-0.517794	2.80473	0.00185259	0.109294
SMIM5	-0.174077	4.50978	0.001853	0.109294
LPAR6	-0.237339	5.2974	0.00185498	0.109294
TIMM8B	-0.167542	3.47427	0.00185685	0.109294
TRBV6-2	0.186475	1.06921	0.00185707	0.109294
SNX4	-0.144325	4.0561	0.0018574	0.109294
PLEKHM3	0.077542	6.04065	0.00186383	0.109294
MT-ND4L	0.266867	2.92385	0.00186501	0.109294
RPL41	-0.238144	7.69114	0.0018703	0.109294
TENT5C	-0.224294	9.91536	0.00187037	0.109294
TMEM80	0.0837123	3.71764	0.00187292	0.109294
MPO	-0.231023	2.39603	0.0018757	0.109294
C14orf132	0.189558	2.29256	0.00187603	0.109294
ABHD14B	0.0975223	2.80321	0.001877	0.109294
SDAD1P1	-0.134499	1.27861	0.00188183	0.109404
SP110	0.0950826	7.5881	0.00189032	0.109727
IL10	-0.245579	-0.88522	0.0019026	0.110009
ALG12	0.0776267	3.87955	0.00191008	0.110009
MINDY1	0.116724	6.01992	0.00191189	0.110009
AOC2	0.155009	2.94908	0.00191219	0.110009
ST3GAL1-DT	-0.093786	1.26552	0.00191579	0.110009
RPL18P10	0.166289	-1.59227	0.00191735	0.110009
PVR	0.108075	3.55993	0.00191774	0.110009
MIR3176	0.364815	-1.29748	0.0019188	0.110009
TAF3	0.0560479	3.72654	0.00192404	0.110096
RUNDC1	0.0753865	4.30534	0.00192774	0.110096
RAF1	0.0779193	8.11905	0.00192919	0.110096
ADAMTS10	0.141587	3.42215	0.00193631	0.110334
MTHFD2	-0.10867	4.90817	0.00194542	0.110429
PRAG1	0.133723	2.41228	0.00195052	0.110429
CERS5	0.0576148	5.07812	0.00195142	0.110429
NDFIP2	-0.129499	2.52844	0.00195188	0.110429
BDH2	-0.122119	2.52865	0.00195279	0.110429
HLA-W	0.174096	2.94023	0.00196074	0.110478
DCLRE1A	-0.114797	3.25733	0.00196171	0.110478
ZDHHC2	-0.115262	6.75323	0.00196416	0.110478
SNORA46	-0.264653	1.26371	0.00196683	0.110478
MSMO1	-0.105894	3.98761	0.00197335	0.110478
RARS1	-0.0959546	5.4674	0.00197351	0.110478
BAG1	-0.161093	7.89944	0.00197441	0.110478
MS4A3	-0.250451	2.73096	0.00198088	0.110674
TAGAP	0.0795169	7.56764	0.00200022	0.111326
LARP4	-0.087374	5.24046	0.00200081	0.111326
SIGLEC7	0.10467	3.53665	0.00200151	0.111326
PPP4R2	-0.142114	6.70217	0.00200881	0.111559
ZCCHC10	-0.155803	2.85503	0.00201168	0.111559
GTF2IRD2P1	0.247132	-1.2651	0.00201887	0.111719
RN7SL23P	0.137361	0.349172	0.00202459	0.111719
MT-ND4	0.242448	4.6777	0.00202464	0.111719
PNPLA1	0.126064	2.11357	0.00202656	0.111719
HES1	-0.164811	0.744605	0.00204025	0.111918
MAP4K2	0.117463	4.83346	0.00204032	0.111918
SMIM15	-0.120357	4.60448	0.00204059	0.111918
PLEKHG3	0.114709	7.77322	0.00204222	0.111918
RPL35P5	-0.237887	-0.797294	0.00204797	0.111918
SAMD9	-0.248125	7.28344	0.0020482	0.111918
ZNF845	-0.173553	4.31848	0.00205792	0.112284
WNT7A	0.124234	2.31807	0.00207226	0.112758
BRCA2	-0.135983	3.22235	0.00207559	0.112758
PSMD6-AS2	0.0906868	5.70276	0.00207567	0.112758
NFKBID	0.0998734	3.62806	0.00207947	0.1128
DNAJC6	-0.207524	4.05393	0.00209247	0.113338
CSRNP2	0.063519	4.28849	0.00209547	0.113338
STK35	0.091083	4.95996	0.00210466	0.11367
SH3RF3	0.146307	2.93547	0.00211854	0.11412
RBX1	-0.124323	5.39632	0.0021203	0.11412
MKRN9P	-0.234209	-0.251033	0.00212434	0.11412
RPL9P18	-0.334441	-1.15067	0.00212524	0.11412
CENPE	-0.186239	2.21375	0.00213609	0.114386
RPL34	-0.284032	6.06085	0.00213699	0.114386
GOLT1B	-0.133884	5.13304	0.0021394	0.114386
ATXN7L3-AS1	0.109149	0.0419364	0.00215141	0.114757
MIR3680-2	0.385362	-2.58609	0.00215521	0.114757
IGLV2-11	-0.277664	1.44572	0.00215557	0.114757
PDCL3P4	0.0979711	1.50669	0.00216197	0.114933
FPR2	0.116663	7.82499	0.00216644	0.115006
MKRN1	-0.165146	10.0627	0.00217183	0.115114
TAF1D	-0.149762	7.13262	0.00217916	0.115114
RAB7A	0.103142	5.26508	0.00217935	0.115114
UQCR11	-0.133463	4.92459	0.00218082	0.115114
LINC00528	0.0887515	3.34959	0.00219649	0.115777
WDR82P2	0.242924	-1.21974	0.00220701	0.116087
ALDH1A2	0.175471	2.82401	0.00221283	0.116087
TRAPPC13	-0.108349	4.58652	0.00221464	0.116087
TMEM123	-0.149817	7.9212	0.00221483	0.116087
LINC01013	-0.257288	0.516321	0.00223089	0.116764
NRIP1	-0.107146	5.83128	0.00224714	0.11745
TMCC3	0.0940299	6.7399	0.00225874	0.117749
LACC1	-0.123277	2.42576	0.00226152	0.117749
MIR7851	0.171051	-1.86224	0.00226233	0.117749
VRK1	-0.158059	4.78841	0.00226726	0.117841
HINT1	-0.168852	4.89906	0.00227717	0.118191
ACTG1P1	0.141894	-0.857791	0.00228397	0.118235
TM9SF1	0.060363	2.26164	0.00228437	0.118235
TUFT1	0.0918455	2.5298	0.00228872	0.118296
C5AR1	0.135122	6.20353	0.00229522	0.118468
ACSM3	-0.133128	3.69638	0.00230305	0.118707
ABCC4	-0.12353	5.63865	0.00230699	0.118746
TBCEL	-0.140699	5.53918	0.00231547	0.118968
ERLIN2	-0.0488435	5.00681	0.00231769	0.118968
ARL6IP6	-0.0823415	5.18828	0.00232694	0.119279
DHX29	-0.0847332	5.18511	0.00233878	0.119591
SNORD116-18	-0.408546	0.328981	0.00234202	0.119591
PCGF5	-0.114935	7.38884	0.00234267	0.119591
ANKS6	0.0860448	3.14278	0.00235322	0.119704
SNORA65	-0.166292	-0.0767778	0.00235401	0.119704
VWDE	0.242829	2.60374	0.00235466	0.119704
RNF11	-0.184989	7.92392	0.00235773	0.119704
RN7SL8P	-0.438802	-0.951414	0.00239212	0.121285
RNU5D-1	-0.34334	-1.61552	0.00240382	0.121713
OPA1	-0.0957766	6.86896	0.00240851	0.121785
CCDC13	0.115974	0.259717	0.00242391	0.122398
C18orf32	0.0529487	3.60487	0.00243766	0.122925
GBA1	0.109135	3.27336	0.00245025	0.123314
TMED7-TICAM2	-0.138534	-0.538854	0.00245745	0.123314
PSMB2	0.064158	4.48012	0.00246105	0.123314
MANEA	-0.144687	4.13881	0.00246206	0.123314
UBE2Q2P13	0.0878539	1.87981	0.00246458	0.123314
MKNK1	0.0940397	6.59933	0.00246522	0.123314
HLA-DQA2	-0.454595	2.56344	0.00246863	0.123319
SLC35F6	0.105977	3.75512	0.00247761	0.123428
RNVU1-6	-0.31682	-2.0343	0.00248358	0.123428
ETV7	0.282147	2.42125	0.00248397	0.123428
IRF1	0.0821289	9.33091	0.00248406	0.123428
COLQ	0.128931	3.12104	0.00249132	0.123624
RNU5A-1	-0.432819	1.20498	0.00249701	0.123742
TMEM238	0.133156	0.28373	0.00250987	0.124186
KIF5C	0.101726	3.7289	0.00251266	0.124186
CDC34	-0.168244	7.73923	0.00251712	0.124226
PRKXP1	0.141275	2.32831	0.00252763	0.124226
TCEA1	-0.0945397	6.27223	0.00253192	0.124226
LINC00877	0.103756	4.40769	0.00253282	0.124226
KRT18P4	0.0954011	1.93402	0.00253766	0.124226
UBN1	0.120056	7.24528	0.00253823	0.124226
STARD4	-0.131142	4.43615	0.00253956	0.124226
MFAP1P1	0.175032	-0.594007	0.00254012	0.124226
FMNL1-DT	0.105078	5.32069	0.00254771	0.124434
ZFP36	0.109293	5.7548	0.00255764	0.124755
GZMK	-0.190555	4.56746	0.00256496	0.124949
WBP1LP1	0.131459	-0.0158546	0.00257153	0.125073
ITPKB-IT1	0.104421	3.42076	0.00257421	0.125073
MZT1	-0.149521	2.96068	0.00258724	0.125542
KPNA3	-0.0851143	4.88909	0.00261584	0.126756
SUSD6	0.127111	6.32847	0.00262083	0.126756
MT-CYB	0.231233	4.53172	0.00262315	0.126756
LINC00173	0.124385	2.12169	0.00262588	0.126756
PPARD	0.10293	4.04583	0.00263733	0.126811
KIAA0319	0.141919	3.41159	0.00263968	0.126811
P2RY12	-0.145472	2.97433	0.00264303	0.126811
LINC02863	0.103858	5.84617	0.0026475	0.126811
PMAIP1	-0.151354	3.89649	0.00265063	0.126811
METTL9	-0.0978653	7.10452	0.00265316	0.126811
LINC02915	-0.188729	2.09343	0.00265318	0.126811
NCOA5	0.0594873	4.61874	0.00265453	0.126811
MT-ND2	0.231073	3.70704	0.00265763	0.126811
CIP2A	-0.117738	3.22333	0.00270584	0.128946
RPL23	-0.262684	6.70484	0.00271457	0.129127
SKIL	-0.123021	5.88077	0.00271864	0.129127
SNORA66	-0.136189	-0.590388	0.00272002	0.129127
UBE2J1	-0.098379	6.50623	0.00273868	0.129847
PFKFB4	0.0995577	6.41257	0.00275093	0.130262
GPA33	0.0949635	2.82986	0.00276493	0.130667
RNY3P1	-0.484739	1.81318	0.00276649	0.130667
OPTN	-0.121437	6.89823	0.00279402	0.1318
ARMT1	-0.119876	4.63525	0.00280831	0.132307
SLC35E1P1	0.139916	-0.320353	0.00282618	0.13298
FECH	-0.192104	7.62979	0.00283867	0.133399
TESK1	0.102578	2.40009	0.002846	0.133435
TBL1XR1	-0.0961489	8.20189	0.00284658	0.133435
FAM167A	0.251494	0.633298	0.00289163	0.135339
ZBTB16	0.154731	3.95404	0.00289834	0.135339
MYD88	0.114926	6.12275	0.00290127	0.135339
CD37	0.125509	6.18533	0.00290273	0.135339
ADCY9	0.112886	3.84595	0.00290535	0.135339
PCDHGA7	0.160363	0.506067	0.00291242	0.13534
NCAPG	-0.228361	1.53278	0.00291264	0.13534
TXNDC9	-0.139453	4.05956	0.00292222	0.13552
YKT6	0.0518628	5.54249	0.00292465	0.13552
RAB4B	0.0980358	2.46266	0.00293226	0.13552
NUDT15	-0.0919225	1.94498	0.00293855	0.13552
RLIG1	-0.120216	4.31102	0.002943	0.13552
SPRED1	-0.132839	3.56537	0.00294333	0.13552
ZWILCH	-0.0848399	2.86216	0.00294363	0.13552
PWWP2AP1	0.327779	-1.06924	0.00294705	0.13552
SIGLEC14	0.248729	2.91802	0.00294925	0.13552
GSKIP	-0.137245	4.3917	0.00297019	0.136314
RNF122	0.101368	3.04014	0.00297473	0.136355
TMEM150A	0.13977	1.11112	0.00297847	0.136358
LINC01876	0.225667	1.21161	0.00299359	0.136882
CCL4L2	-0.210363	1.86298	0.00301301	0.137602
EVA1C	0.0995371	2.92124	0.00302268	0.137839
ATP6V0D1	0.082881	7.01472	0.0030256	0.137839
TMED2-DT	0.0730394	2.87348	0.00304432	0.13838
BNIPL	0.0994956	1.47285	0.00304664	0.13838
OR2L5	-0.229098	-0.289851	0.00305158	0.13838
LINC00355	0.645034	-0.995968	0.00305233	0.13838
OMG	-0.14195	0.599841	0.00306459	0.138767
LTK	0.167228	2.47209	0.003072	0.138933
LINC02988	0.148751	0.831986	0.0030791	0.139086
ARHGEF12	-0.143873	7.06793	0.00309539	0.139586
TMEM167A	-0.130324	6.60947	0.00309766	0.139586
RCN2	-0.0841721	3.96932	0.00311591	0.140239
LINC01138	0.0761847	5.22763	0.00312313	0.140285
RPL11	-0.192278	7.44387	0.00312447	0.140285
SEC62	-0.121957	7.20384	0.00313219	0.140396
RNU6-204P	-0.165566	-1.26813	0.00313449	0.140396
TFDP1	-0.125378	5.94856	0.00313992	0.140471
KRIT1	-0.0962071	4.972	0.00314678	0.140528
ZNF441	-0.185219	4.28358	0.00314874	0.140528
FBXO30	-0.121132	5.80947	0.00315363	0.140578
CDC42-IT1	0.101206	3.50375	0.00315961	0.140641
IER3IP1	-0.132	3.25572	0.00316259	0.140641
RPS27	-0.254156	8.17916	0.00316703	0.14067
PARP16	0.0870692	2.96321	0.00317369	0.140796
PATL1	0.0874852	5.22351	0.00317805	0.140796
RMND1	-0.0629613	3.70965	0.0031812	0.140796
CTDNEP1P2	0.127323	0.933743	0.00319616	0.141291
STX5-DT	0.137633	-0.0901067	0.00320466	0.141499
C16orf54	0.0882494	6.73398	0.00321632	0.141825
LINC02365	-0.158544	0.0137926	0.00322207	0.141825
PLPPR2	0.142484	3.73284	0.00322348	0.141825
HIGD1A	-0.148452	3.82571	0.00325476	0.143033
FCGR2A	0.0940346	9.4358	0.00326173	0.14317
SIRT2	0.0977457	3.58053	0.00330027	0.144628
TMEM126B	-0.103857	4.21337	0.0033027	0.144628
TIRAP	0.0972434	3.74438	0.00331479	0.144938
THRA	0.0919025	3.75942	0.00332631	0.144938
RORC	0.165089	1.86087	0.00332726	0.144938
SYTL3	0.0947189	5.75399	0.0033318	0.144938
ZNNT1	0.0905016	2.35348	0.0033328	0.144938
ATP5MG	-0.133271	4.77907	0.00333512	0.144938
EMC3-AS1	0.0768398	2.71264	0.003337	0.144938
TBXA2R	0.206598	0.316771	0.00334796	0.145142
KLHL13	-0.16786	0.395717	0.00335328	0.145142
FANCE	0.0577165	2.45946	0.00335338	0.145142
LINC03078	0.271336	-1.1104	0.00337034	0.14567
PCIF1	0.0811621	5.12468	0.00337675	0.14567
SIRPG	0.108562	2.56617	0.00337775	0.14567
MAPK6	-0.0811103	4.61324	0.00338123	0.14567
YBX1P8	0.240703	-1.80057	0.00338768	0.14578
EMD	0.0836485	2.89998	0.00339753	0.145878
NLE1	0.066931	3.56603	0.00339779	0.145878
FBXO4	-0.102412	3.25934	0.003411	0.145921
SEC24A	-0.0744173	4.84092	0.00341509	0.145921
KIAA1586	-0.165314	4.35205	0.00341533	0.145921
VWA8-AS1	-0.402455	-1.61829	0.00341917	0.145921
CHILL1	0.118179	2.60803	0.0034204	0.145921
PHC2	0.134898	6.38446	0.00342228	0.145921
KIF13A	0.0872766	7.02815	0.00344234	0.146567
PLAGL1	0.0880823	4.84655	0.00344914	0.146567
FBXO45	-0.0919853	3.72174	0.00345262	0.146567
TTC9	0.104954	4.15454	0.00345317	0.146567
MRPL54	-0.101569	3.81883	0.0034827	0.147652
PIGS	0.0647449	4.33591	0.00349657	0.148072
ZCCHC14	0.0555354	4.31995	0.00350118	0.148099
TRAPPC14	0.0918044	5.24471	0.00350671	0.148165
BIN3	0.071488	5.58786	0.00351407	0.148287
NCF1B	0.104254	6.1304	0.00351756	0.148287
POLA2	0.0967217	1.99592	0.00352754	0.148539
TMEM39B	0.110592	2.05956	0.003545	0.148991
CMPK1	-0.114245	6.35463	0.00354627	0.148991
RNVU1-2	-0.266441	-1.22237	0.00355426	0.149059
RPL23P6	-0.345241	-1.48049	0.00356089	0.149059
HES4	-0.225016	1.95014	0.00356117	0.149059
PHLPP1	0.0704613	4.34706	0.00356469	0.149059
PCDHGA4	0.187317	-0.38194	0.00356789	0.149059
TGIF2	0.0771015	3.76433	0.00357756	0.149296
CIAO2A	-0.111583	4.56838	0.00358461	0.149423
CYP4F3	0.122726	7.77327	0.00358968	0.149467
SMIM38	0.211779	0.485692	0.00359838	0.149555
ST6GALNAC4P1	0.0908733	0.59906	0.00360378	0.149555
GUCY2C-AS1	0.150196	-0.155743	0.00361145	0.149555
TLR7	-0.104158	4.06008	0.00361179	0.149555
ACER3	-0.0694637	5.27433	0.00361501	0.149555
MTDH	-0.0739573	6.63326	0.00361587	0.149555
SERPINB10	-0.270514	0.277095	0.00364192	0.150459
TMED7	-0.127162	5.95393	0.0036458	0.150459
FPR1	0.101454	8.83486	0.00365047	0.150485
KIAA0040	0.0740495	7.15424	0.00367419	0.151137
TOB2	0.0956678	3.54053	0.00367441	0.151137
RPL35	-0.19245	6.86076	0.00368222	0.151194
HYCC1	-0.0931138	6.08956	0.00368389	0.151194
LILRA1	0.0958866	5.78724	0.00369357	0.151424
CFAP410	0.087013	3.53457	0.00370013	0.151429
ITM2A	-0.14996	4.92613	0.0037018	0.151429
PIWIL4	-0.0803291	2.49951	0.00370893	0.151554
LIPN	-0.16773	4.17699	0.00371413	0.1516
SUGT1P4-STRA6LP	0.0750503	2.66482	0.00373057	0.152104
MINAR1	-0.170483	1.19392	0.00375051	0.15275
ATP11A	0.101257	7.22217	0.0037599	0.152966
CWC25	0.0586702	5.33053	0.00379244	0.154016
MOSPD1	-0.117283	3.78164	0.00379399	0.154016
RNU6-1152P	0.173363	-0.101411	0.00382502	0.154985
S100A11	0.112992	4.96638	0.00383026	0.154985
MKNK2	0.121605	6.5869	0.00383034	0.154985
STRADBP1	-0.208727	0.558012	0.0038374	0.155102
PLEKHB1	0.101847	2.58462	0.00384271	0.155149
DZIP3	-0.120483	4.60731	0.00385058	0.155163
RNU1-3	-0.679925	3.96862	0.00385138	0.155163
SCARNA7	-0.307355	6.48647	0.00388214	0.156003
NUP50-DT	0.0917504	4.84241	0.00388294	0.156003
ZNF765	-0.143611	4.17529	0.00389831	0.156003
RPL7	-0.327859	7.82353	0.00390179	0.156003
HYMAI	0.109472	2.01345	0.00390273	0.156003
CAPN1-AS1	0.141352	3.36003	0.00390354	0.156003
RNU6-313P	0.227662	-1.39703	0.00390754	0.156003
RPL6P30	-0.267251	-1.65468	0.00391488	0.156003
ST6GALNAC1	0.168691	0.710988	0.00391675	0.156003
RAB35	0.0576973	5.29789	0.00391846	0.156003
TBC1D12	-0.0969021	3.39827	0.00392181	0.156003
CKAP4	0.0935779	5.01977	0.00392629	0.156003
WAS	0.140955	4.85329	0.00392666	0.156003
CFL1	0.0830851	6.50841	0.00393562	0.156192
TESMIN	0.0776419	2.8478	0.00394172	0.156268
VBP1	-0.15851	4.46594	0.00395424	0.156589
RBAK	-0.144814	4.80808	0.00395822	0.156589
SERPINB2	-0.145961	1.17025	0.00397912	0.157169
KIF11	-0.12394	2.07167	0.0039895	0.157169
GUSBP16	0.180571	-0.719788	0.00399152	0.157169
JAK3	0.140988	6.84434	0.00399369	0.157169
VPS37B	0.0974046	5.29648	0.00399396	0.157169
RPL35AP26	0.129098	-0.130102	0.00400652	0.157497
CEBPD	0.110497	6.76579	0.00401317	0.157592
TRGV7	0.132819	2.01404	0.00402913	0.157825
PCTP	-0.101239	5.55123	0.0040317	0.157825
NAA38	-0.0911209	4.18076	0.0040323	0.157825
LIN9	-0.112773	2.1813	0.00403606	0.157825
HTRA2	0.05487	4.78484	0.00404696	0.157871
SNHG29	-0.155793	6.85285	0.00404799	0.157871
TAPBP	0.139455	6.6649	0.00404993	0.157871
LINC02976	0.126823	3.00643	0.00407172	0.158258
SCML4	0.0793115	6.01912	0.00407181	0.158258
ARHGAP11A	-0.117224	2.69395	0.00407537	0.158258
PCDHGA8	0.176689	0.415612	0.00407729	0.158258
EXTL3	0.0850216	6.50786	0.00408528	0.158258
KDM7A-DT	-0.164034	3.96851	0.00408535	0.158258
TMEM183A	-0.07435	6.25036	0.00409558	0.158348
MIER3	-0.120896	4.73156	0.00409616	0.158348
VMAC	0.0816875	3.55487	0.00410363	0.158472
NCAPG2	0.166432	4.10512	0.00411959	0.158735
FOXO3	-0.118811	8.53543	0.00412585	0.158735
CNN2	0.121998	7.36672	0.00412727	0.158735
RAB39A	-0.101473	2.12443	0.00412746	0.158735
RHOG	0.109221	4.62094	0.00419542	0.160959
SNORA23	-0.322339	4.43176	0.00419646	0.160959
DYRK3	-0.175071	2.4021	0.00420494	0.160959
FAM20B	-0.0683801	5.64274	0.00421109	0.160959
TMX3	-0.134316	6.44912	0.00421531	0.160959
PAIP1P1	0.107882	0.399354	0.00421534	0.160959
PSMC5	0.0598218	4.21409	0.00422403	0.160959
CRPPA	-0.137527	2.16633	0.00422498	0.160959
IGF1R	0.106693	7.30336	0.00422616	0.160959
DCUN1D3	0.0591038	3.71488	0.00422848	0.160959
CPOX	-0.0651313	4.87117	0.0042468	0.161035
URGCP	0.0567589	4.57207	0.00425316	0.161035
PPM1D	0.0485687	4.84527	0.00425352	0.161035
LRRIQ3	-0.210714	0.603516	0.00425447	0.161035
JAK2	-0.113268	7.67478	0.00425535	0.161035
ZDHHC18	0.101473	7.67625	0.00426629	0.161035
RN7SL451P	-0.619588	-2.57363	0.00426969	0.161035
MIR545	0.106384	-0.25221	0.00427018	0.161035
CASS4	0.0828904	5.86495	0.00427322	0.161035
CEP44	-0.0902386	5.08895	0.0042812	0.161035
RAB1AP1	0.173107	1.9106	0.00428156	0.161035
RPS6KA1	0.0739063	7.48967	0.00428234	0.161035
TPTEP2-CSNK1E	0.102262	0.381421	0.00428955	0.161143
RNVU1-18	-0.797933	6.90233	0.00430234	0.161352
RNF19B	0.0857951	5.80851	0.00430377	0.161352
FBXO36-IT1	0.260929	-2.32706	0.00432357	0.161788
KIF14	-0.177556	2.05637	0.00432407	0.161788
SETD4	0.0483913	4.6504	0.00433216	0.161928
MAN2B2	0.0943007	5.41822	0.00433982	0.162052
CDKN2C	-0.100961	2.24649	0.00434613	0.162125
CKS2	-0.162065	1.15536	0.00436656	0.162724
ATP5MJ	-0.129103	3.88614	0.00437098	0.162726
SEMA4B	0.11337	5.3918	0.00437624	0.16276
TRAV12-1	0.133338	1.4864	0.00439603	0.16325
KCTD2	0.0626244	4.51402	0.0043982	0.16325
TMEM106C	0.0619991	3.44063	0.00442249	0.163796
MT-ND3	0.186163	4.13693	0.00442273	0.163796
GRHL1	-0.137582	1.97939	0.0044261	0.163796
PEG13	0.114174	3.96285	0.00443546	0.163963
DNM1P47	0.0926073	2.04984	0.00443939	0.163963
PI4KAP2	0.145999	2.25007	0.00444729	0.164029
MIR5587	0.157801	-0.321397	0.00444999	0.164029
RPS24	-0.156299	6.80361	0.00446228	0.164319
TPD52L2	0.0714357	6.79583	0.00446686	0.164326
ADCK2	0.0579931	3.42309	0.00447468	0.164451
PCBP2-OT1	0.159748	-0.786023	0.00448188	0.164554
APEX2	0.0687823	2.69866	0.00449561	0.164731
ADAM12	0.210062	1.84079	0.00449967	0.164731
LINC00852	0.116753	2.75023	0.00449997	0.164731
ZNF8	0.0823075	3.74715	0.00450911	0.164903
LINC01772	0.0949015	3.46431	0.00451661	0.165016
ALOX15	-0.252503	3.4035	0.00452733	0.165245
MAF1	-0.117897	6.98697	0.00454059	0.165332
ATP5F1E	-0.151853	6.61061	0.00455355	0.165332
CUL5	-0.101478	5.80321	0.00455534	0.165332
SNHG17	0.0949673	3.20763	0.0045556	0.165332
NUAK2	0.107204	5.93564	0.00455576	0.165332
ELOB	-0.135653	6.57408	0.00455634	0.165332
RTN4IP1	-0.0613195	3.00017	0.00456157	0.165362
SYNGR1	0.198241	0.867664	0.00457613	0.165728
CDC27P3	-0.176415	-0.381637	0.00459978	0.166423
MAML1	0.10338	5.88874	0.00461111	0.166671
PNPT1P1	-0.129062	1.19116	0.00462712	0.167088
UBXN6	-0.163308	8.33451	0.00463421	0.167182
STK24	0.0571649	7.07288	0.00464199	0.167205
ZNF627	-0.0902158	3.63488	0.00464548	0.167205
LINC01281	0.15878	-0.278931	0.00465282	0.167205
PRCC	0.0600901	3.92951	0.00465282	0.167205
SNORA40B	-0.240359	0.52585	0.00466605	0.167434
ATP8B4	-0.0968907	5.94559	0.00466816	0.167434
MXD3	0.0927878	5.27555	0.00468268	0.167793
RN7SL210P	-0.419447	-2.13329	0.00468938	0.167793
NREP	-0.0672394	3.05939	0.00469169	0.167793
TRAV26-2	-0.153061	0.260206	0.00469954	0.167913
MIR320E	0.144069	-0.135345	0.00471935	0.168459
CABLES2	0.149168	1.249	0.0047369	0.168819
ZNF672	0.0567705	4.74066	0.00473848	0.168819
KIF15	-0.179922	1.93665	0.00474712	0.168965
CTSE	-0.21637	1.41247	0.00476902	0.16944
C8orf88	-0.138415	1.39305	0.00476956	0.16944
MIR4477B	-0.129324	3.12911	0.00478232	0.169731
PYGO2	0.101114	3.78283	0.00479535	0.16987
ANP32E	-0.136612	5.63365	0.00479633	0.16987
FBXO9	-0.0933882	6.69717	0.00479989	0.16987
TPRG1-AS1	-0.146044	0.0870693	0.00480526	0.169898
LTA	0.14447	-0.52847	0.0048162	0.170124
RPL22L1	-0.159623	2.99557	0.00482425	0.170247
SMAP2	0.0988089	8.53287	0.00484133	0.170617
MIR4642	0.10966	-0.655565	0.00484389	0.170617
CEP20	-0.0938267	4.09229	0.00485915	0.170841
NRGN	0.235734	3.07837	0.00485942	0.170841
RPL9P32	-0.290381	-0.420286	0.00487184	0.170999
BLOC1S1	-0.0966551	2.74991	0.00488892	0.170999
GASK1B	-0.117187	5.53014	0.00489134	0.170999
CEP192	-0.063541	7.18964	0.00490019	0.170999
FAM168A	0.0705101	5.4578	0.00490398	0.170999
TREML1	0.17304	2.76863	0.00490756	0.170999
TIMD4	0.128581	0.461247	0.00490757	0.170999
LINC02764	0.244668	-0.471236	0.00490778	0.170999
NCR1	0.123956	3.51866	0.00490827	0.170999
RNY4	-0.363771	0.0539129	0.00491894	0.170999
TRMT10A	-0.12642	2.44779	0.00492206	0.170999
IER5	-0.0774155	6.20179	0.00492379	0.170999
CNN2P9	0.150926	0.202058	0.00492758	0.170999
MIR3657	0.120413	-0.765299	0.00492815	0.170999
PGAP2	0.0770219	2.66102	0.00494428	0.171399
RAB44	-0.155891	3.6191	0.00495807	0.171717
RPS18P9	0.0577824	2.65804	0.00497087	0.171916
ZBTB33	-0.121668	5.23219	0.00497733	0.171916
PI4K2B	-0.124039	4.09092	0.00497765	0.171916
TARS1	-0.0710335	5.23521	0.00498517	0.172002
GSDMA	-0.328957	-0.799118	0.00499572	0.172002
SNORA20	-0.368795	0.312672	0.00499745	0.172002
TMA7	-0.211633	4.68978	0.00499863	0.172002
BCL2L12	0.0835176	1.10908	0.00500324	0.172002
ACBD4	0.103376	2.14916	0.00500881	0.172035
SLC25A44	0.08397	5.89016	0.00503285	0.172702
CDK2AP2	0.123386	1.66035	0.00504363	0.172813
MIR4729	0.134256	-0.499843	0.00504672	0.172813
TPP1	0.11279	5.2356	0.00504999	0.172813
RBM33-DT	-0.0700253	2.2772	0.00506048	0.173013
NUP214	0.0541495	6.93416	0.00507029	0.173189
BACE2-IT1	-0.18294	0.357056	0.00508027	0.173371
SRSF8	-0.0719315	5.80163	0.00508789	0.173472
SNORA72	-0.189233	0.568551	0.00509391	0.173519
SFR1	-0.113407	2.43449	0.00511334	0.173652
MRPS18C	-0.110114	4.61617	0.00511952	0.173652
SH2D2A	0.171059	2.3945	0.00511968	0.173652
CANT1	0.0924819	5.63745	0.005124	0.173652
ECE1-AS1	0.121624	0.182125	0.00512456	0.173652
RN7SL470P	0.265523	-1.69054	0.00512577	0.173652
ANLN	-0.167944	1.28003	0.00513635	0.173737
UBIAD1	0.052609	4.19912	0.0051412	0.173737
NR1D1	0.161343	0.32499	0.00514388	0.173737
RPL36A	-0.0631971	2.62761	0.00514693	0.173737
EZH1	0.0622132	6.44536	0.00515166	0.173739
ANPEP	0.187315	5.45402	0.00517249	0.174284
PRR14	0.093353	3.86188	0.00517851	0.174329
CEP57L1	-0.0969722	3.17357	0.00521276	0.17524
ISG20	0.0818644	6.64513	0.00521498	0.17524
RN7SL390P	0.200294	-1.99332	0.00523091	0.175617
CCDC69	0.0885798	6.31579	0.00524589	0.175962
USP4	0.0697576	7.32511	0.00527938	0.176926
C21orf91	-0.140808	6.12437	0.0052891	0.177092
BCAP29	-0.0773496	4.40112	0.00529716	0.177203
GSTK1	0.0660422	6.57709	0.00530704	0.177374
DSC1	0.196568	2.19726	0.00531988	0.177644
C1orf198	0.130564	3.26766	0.00533229	0.177697
MOB3A	0.126059	6.49942	0.0053332	0.177697
PRDX4	-0.106491	3.01779	0.00533579	0.177697
SHLD2	-0.106964	4.68576	0.00535136	0.17776
TMEM97	0.0911807	1.3428	0.00535184	0.17776
EIF1AX	-0.123571	5.21173	0.00535198	0.17776
TXNDC16	-0.0883326	4.8223	0.00536489	0.177873
CLEC11A	-0.173915	1.00191	0.00537315	0.177873
LINC02211	0.419826	-0.947435	0.00537397	0.177873
SGPL1	0.060055	5.79634	0.00537869	0.177873
EXOC5	-0.100471	6.34069	0.00537924	0.177873
RPS10P3	-0.220926	0.273652	0.00539088	0.178052
DIPK2A	-0.0828134	5.34983	0.00539755	0.178052
CFAP92	0.117012	3.83916	0.00540622	0.178052
NXT2	-0.142342	3.37797	0.00540801	0.178052
DICER1-AS1	0.0896045	1.38026	0.00541062	0.178052
FAM86B3P	-0.126631	1.44126	0.00541333	0.178052
MAPKAPK2	0.092633	5.64026	0.00543279	0.178176
STARD3	0.0826914	4.69799	0.00543704	0.178176
RHBDD2	0.0870204	3.19532	0.005442	0.178176
CCS	-0.088079	5.06304	0.005445	0.178176
MOB1B	-0.0939999	5.65987	0.00544738	0.178176
MT-ND5	0.236382	3.94431	0.00544945	0.178176
STOML2	-0.0863957	5.17266	0.00545055	0.178176
IGHV3OR16-13	-0.567258	-2.88219	0.0054596	0.178228
EID1	-0.121838	6.05634	0.00546173	0.178228
MIR3609	-0.308628	5.57726	0.00546842	0.178279
RNU6-431P	-0.115605	-0.463025	0.00547284	0.178279
MIR646HG	0.106599	4.34485	0.00549138	0.178654
ZNF516	0.0930432	7.55868	0.00549394	0.178654
TEC	-0.0890896	3.9544	0.00549906	0.178664
ALS2	-0.0575669	5.17015	0.00551521	0.179033
MARK2	0.120691	5.5303	0.00552749	0.179275
DTNB	0.0716181	3.75554	0.00554106	0.179559
SLC39A13	0.0976466	2.62152	0.00554811	0.179631
DYNLT3	-0.170363	3.68224	0.00556002	0.179649
ZFAND5	-0.0831979	7.53623	0.00556084	0.179649
HAGH	-0.152988	7.49141	0.00556311	0.179649
RN7SL197P	-0.570638	-2.9271	0.00556826	0.17966
LINC00824	0.201387	1.22605	0.00558047	0.179846
CHMP6	0.0778337	3.18827	0.0055857	0.179846
NFE4	0.130599	3.16162	0.00559374	0.179846
DFFB	0.045145	3.98277	0.00559439	0.179846
PRRG4	0.116398	5.46047	0.00559818	0.179846
KATNIP	0.0815239	4.95827	0.00560892	0.179987
MIR378A	-0.239337	-2.37179	0.00561223	0.179987
LPAR5	0.0912211	2.85519	0.00562613	0.180169
RHEBP1	-0.227672	-2.17689	0.00562894	0.180169
GAB2	0.109559	6.54253	0.00564033	0.180169
ARSA	0.18157	2.98774	0.00564341	0.180169
EEF1E1	-0.107738	2.01244	0.00564977	0.180169
BTNL8	0.10792	4.71157	0.0056515	0.180169
TNFRSF1A	0.103276	6.63579	0.00565174	0.180169
TMEM126A	-0.130077	2.27259	0.00566658	0.180396
TWF1	-0.137413	5.2055	0.00566854	0.180396
HDGF	-0.134436	7.67816	0.00569785	0.181123
MZT2B	-0.11018	5.35507	0.00570109	0.181123
VAMP4	-0.112283	4.98123	0.00571127	0.181291
CDA	0.121203	4.12807	0.00572678	0.181629
LINC02836	-0.294512	-1.58927	0.00573545	0.18166
MAP3K1	-0.0646819	8.71922	0.00574016	0.18166
RBFA	0.0547148	2.82633	0.00574238	0.18166
NME1	-0.113751	1.87854	0.00574879	0.181693
FGFR1OP2	-0.114943	6.8576	0.00575316	0.181693
IL23R	0.193881	0.781655	0.005763	0.181849
UHMK1	-0.088255	8.25289	0.00577881	0.182002
SLC39A12	-0.543516	-1.52188	0.00577888	0.182002
PRKAG2-AS2	-0.239781	-0.942254	0.0057867	0.182002
WWOX	0.0686389	4.07721	0.00578739	0.182002
TSNAX	-0.111233	5.51002	0.00579262	0.182013
APLF	-0.0882188	3.39329	0.00580272	0.182177
ABHD10	-0.112859	4.82727	0.00581106	0.182285
HEPACAM2	-0.181622	1.19084	0.00583745	0.182742
CKLF-CMTM1	0.150588	0.825582	0.00583775	0.182742
ACTR6	-0.124198	4.07373	0.00585191	0.182742
C2orf68	0.0506398	6.07466	0.00585289	0.182742
MIR3605	0.124533	0.188716	0.00585857	0.182742
PANX2	0.182083	2.08499	0.0058588	0.182742
ZNF747	0.0580394	2.8316	0.00585993	0.182742
SFRP1	-0.440822	-0.461745	0.00586621	0.182784
PSMD9	0.0550071	3.5363	0.00587762	0.182987
OMA1	-0.082432	5.50834	0.00589008	0.183073
POC1B-AS1	0.0729069	5.13312	0.00589021	0.183073
ACTR3C	0.0642485	4.18682	0.00590809	0.183268
NCOA6	0.0787228	5.51627	0.00590829	0.183268
DNA2	-0.0930213	3.44413	0.00591124	0.183268
CKB	-0.134218	1.1955	0.00591924	0.183363
CYBB	-0.0935322	9.41701	0.00595085	0.183939
TCAF2P1	0.172669	-0.386367	0.00595322	0.183939
TEX30	-0.105774	2.43258	0.00596201	0.183939
NFYB	-0.123536	3.92076	0.00596773	0.183939
MIR6842	0.286626	-2.17196	0.00597203	0.183939
YES1P1	-0.0938077	3.27754	0.0059721	0.183939
HIPK1-AS1	-0.100107	1.46776	0.00597238	0.183939
SLC25A6P3	0.126551	-0.254254	0.00598413	0.184149
OR2W3	-0.206669	4.02499	0.00599886	0.18445
GET3	-0.0887553	4.98513	0.0060154	0.184749
SPTB	-0.218632	5.93775	0.00601848	0.184749
RPGRIP1	0.0966469	3.46727	0.00602832	0.184818
RGS18	-0.180073	7.33516	0.00603065	0.184818
RN7SKP184	0.165438	0.463365	0.00603861	0.184909
OTUB1	0.0494217	4.42212	0.00607082	0.18558
FKBP11	0.115033	3.37591	0.0060735	0.18558
ZHX2	0.0851458	4.39363	0.00608011	0.18558
IGHV4-31	0.22289	-0.277002	0.00608044	0.18558
BMX	0.145597	3.13133	0.00610141	0.186053
RNU6-928P	0.244892	-2.31184	0.00610725	0.186053
NADK	0.0954522	7.7429	0.0061109	0.186053
HADH	0.0495137	4.11355	0.00613345	0.186587
POLR2J4	0.0773395	2.407	0.00614478	0.186779
ZFAND1	-0.123724	4.40311	0.00615834	0.187039
MGAT3	-0.143025	1.95908	0.00618296	0.187495
HLA-DQA1	-0.120306	6.04911	0.00618341	0.187495
EDC3	0.0675575	4.00232	0.00619286	0.187629
RPL21P75	-0.261943	-0.943095	0.00620685	0.187716
EFCAB12	0.152593	1.1996	0.00621106	0.187716
ZMYM1	-0.0908228	4.29168	0.00621995	0.187716
ARID3B	0.110723	4.43648	0.00622023	0.187716
FAR1-IT1	0.0802319	1.57141	0.00622425	0.187716
MRPL13	-0.118997	3.23811	0.00622598	0.187716
IRF2BP2	-0.0581962	6.88136	0.00624334	0.187938
DGCR2	0.0928047	6.66363	0.00624343	0.187938
LINC02363	0.137482	1.31074	0.00626642	0.188341
CRACR2A	0.0667934	5.58827	0.00626692	0.188341
LPCAT3	0.0769131	4.23251	0.00628064	0.188601
GNB5	0.0530758	5.43486	0.0063255	0.189742
FHL1	0.0979681	3.7643	0.00632881	0.189742
CTNNBIP1	0.095066	2.76733	0.00633725	0.189842
HNRNPA0	-0.0706197	5.59236	0.00635086	0.190097
ARL14EP	-0.114538	5.49064	0.00638933	0.191095
PRDX5	-0.136985	7.17611	0.00640288	0.191329
CCND3	0.0834164	6.85634	0.00640742	0.191329
GRK5	0.0584211	5.07081	0.00643829	0.191801
RDX	-0.0744391	4.39174	0.00644832	0.191801
RBCK1	0.0929112	5.53833	0.00645167	0.191801
HSH2D	0.112867	5.80599	0.00645239	0.191801
PBX4	0.105313	1.92229	0.00645322	0.191801
TPPP3	-0.134579	1.11302	0.00645409	0.191801
LRRC40	-0.111171	4.25241	0.00647138	0.19203
LYSMD3	-0.14619	5.61133	0.00647213	0.19203
MIR646	0.168613	0.0799703	0.00648477	0.192252
STX3	0.0862601	7.64546	0.00649403	0.192269
BLOC1S3	0.0965337	2.91075	0.00649565	0.192269
PDIK1L	-0.124289	3.78801	0.00654055	0.193445
DNMBP	0.0947095	3.87249	0.00654936	0.193552
PYURF	-0.11252	4.61838	0.0065676	0.193921
EPHB4	0.136689	3.1089	0.00657867	0.193921
NCOA4	-0.102903	10.4365	0.00658105	0.193921
IL12RB1	0.083071	4.41952	0.00658964	0.193921
COPS3P1	0.398659	-1.51012	0.00659556	0.193921
MXD1	0.0862378	9.84525	0.00659939	0.193921
S1PR2	0.118105	0.94717	0.00659995	0.193921
ZNF23	-0.0609797	2.64568	0.00660351	0.193921
ZNF468	-0.0956691	4.48342	0.00660934	0.19394
SFMBT1	0.0691249	4.56607	0.00661591	0.19396
KAT6B	0.050366	6.38561	0.00662281	0.19396
GUSBP9	0.157611	0.868701	0.00662564	0.19396
CRIP2	0.156464	1.97012	0.00665156	0.194357
GON7	-0.119086	2.60359	0.00665988	0.194357
PTAFR	0.0869418	8.11171	0.00666029	0.194357
MYL9	0.224159	1.46128	0.00666655	0.194357
TRGVA	0.274224	-2.47071	0.0066738	0.194357
UBQLN1	-0.063715	7.3774	0.00667455	0.194357
LDLRAP1	0.10441	5.53812	0.00667572	0.194357
ZNF875	0.0638604	5.26456	0.00669847	0.194678
CMTM5	0.157373	2.87009	0.00669877	0.194678
CD7	0.133884	2.3112	0.00670652	0.194678
RN7SKP269	0.110643	-0.828881	0.00671325	0.194678
FOSL2	0.100404	7.35632	0.00672446	0.194678
ZFAND4	-0.0616237	5.24107	0.00672981	0.194678
SERPINA1	0.108391	7.68	0.00673421	0.194678
ZNF268	-0.119917	4.49151	0.00673872	0.194678
TGM3	0.163369	1.74045	0.00674622	0.194678
ASNSD1	-0.148354	4.95761	0.00674772	0.194678
PCDHGB5	0.14719	0.428173	0.00675367	0.194678
CHP1P2	0.1126	5.41519	0.00675756	0.194678
CDK1	-0.178483	0.571132	0.00675885	0.194678
CNTLN	-0.0825256	3.86832	0.00675988	0.194678
UBA52P4	-0.287221	-2.62507	0.00678837	0.195348
RAP2C	-0.116315	5.63036	0.00680784	0.195419
FANCA	0.127236	3.49598	0.00681446	0.195419
RN7SL124P	0.156536	0.356786	0.00681524	0.195419
ZNF525	-0.146961	4.14547	0.00681535	0.195419
ZNF669	-0.0905097	3.28262	0.00682158	0.195419
GAS6-AS1	0.174268	2.79493	0.0068223	0.195419
CHMP2A	0.0823473	5.532	0.00682978	0.195483
CSNK1D	0.109321	6.39462	0.00685563	0.196068
TNFRSF13C	0.172598	2.62021	0.00686356	0.196068
SLC25A24	-0.0822923	5.69489	0.00686602	0.196068
NF2	0.0661812	4.91637	0.00687596	0.196202
PIGL	0.0575337	4.41974	0.00689536	0.196205
PISD	0.0987353	6.44161	0.00689591	0.196205
THOC5	0.0784069	5.97694	0.00689676	0.196205
HCG11	-0.1048	4.37857	0.00689714	0.196205
RPS7P11	-0.307162	-1.24581	0.00690813	0.196368
B9D2	0.0642101	3.75262	0.00692093	0.196582
MAPK13	0.127487	5.30517	0.00694142	0.196806
TPT1P4	-0.281857	-2.41948	0.006945	0.196806
TMEM134	0.0937108	2.69176	0.00694778	0.196806
DNAJC8P2	0.100599	2.64102	0.00694995	0.196806
CLCN4	0.12919	3.98308	0.00695796	0.196883
EEIG2	-0.0699142	5.21881	0.00697603	0.197172
IBTK	-0.0784337	6.04602	0.00698166	0.197172
ZNF197	-0.0831934	4.64527	0.00698681	0.197172
OR56B2	-0.21933	-1.63974	0.00698931	0.197172
MIDN	0.112362	5.56163	0.00700362	0.197426
CYP27A1	0.147342	4.67074	0.00701639	0.197636
CYSLTR1	-0.0877894	5.10915	0.00703752	0.197919
PRSS41	-0.219246	-0.483331	0.00704099	0.197919
RPL36AP8	-0.392013	-2.37044	0.00704235	0.197919
MAML3	0.0956038	4.61758	0.00705428	0.198007
SAR1B	-0.0605385	5.67357	0.00706453	0.198007
MARCHF1	-0.107796	7.03938	0.00706761	0.198007
IFIT5	-0.1737	5.91913	0.0070741	0.198007
TBC1D13	0.103441	3.16914	0.00707463	0.198007
FOXN2	-0.101653	7.04899	0.00708182	0.198007
AGGF1	-0.0864398	4.53574	0.0070827	0.198007
IGLV3-10	0.288621	-1.75068	0.00709381	0.198011
PCMTD1	-0.105632	7.76241	0.00709611	0.198011
H2BC26	-0.172281	5.16497	0.00709878	0.198011
SF3A1	0.0836138	5.55856	0.00710492	0.198034
GNAI2	0.0902165	7.25719	0.00711375	0.198117
VSIG1	0.0853382	3.41347	0.00711851	0.198117
RNF138	-0.118142	5.35155	0.00712634	0.198187
CCDC88A	-0.0895002	6.6349	0.00714221	0.19848
STK11	-0.0928784	6.85917	0.0071502	0.198508
FAM53C	0.0931709	6.27006	0.00715388	0.198508
UQCRQ	-0.119033	4.00194	0.0071693	0.198686
BACE2	-0.116869	3.70419	0.00717095	0.198686
PIP5K1B	-0.0782185	4.26361	0.00717977	0.198783
DNAJB9	-0.129062	4.16257	0.00719616	0.198927
LGALS1	-0.109463	6.34661	0.00719971	0.198927
OR2T11	0.275804	-0.993603	0.00720099	0.198927
ZNF888	-0.0998552	3.22364	0.00721525	0.199173
COA6-AS1	-0.112168	1.00698	0.00722191	0.199209
GPR180	-0.0984552	4.20963	0.00723095	0.199311
SLC23A2	0.0719174	6.03712	0.00725485	0.199822
RPS3AP26	-0.315917	1.23419	0.00727896	0.200338
TCTA	0.0584451	4.38674	0.00729552	0.200523
PAIP1P2	-0.151552	0.203989	0.00729643	0.200523
GOLGA8A	0.100112	5.5223	0.00730368	0.20057
KYAT1	0.0875565	2.47367	0.0073089	0.20057
FAAH2	0.105749	3.23815	0.00733632	0.201174
ZNF518A	-0.111145	6.59983	0.00735426	0.201518
HLA-G	-0.245224	0.133792	0.00738435	0.202193
ADAR	0.0967703	8.8264	0.00746295	0.203911
LRRC63	-0.116704	0.21583	0.00746881	0.203911
TRBJ2-6	0.106962	0.662808	0.0074751	0.203911
DEAF1	0.0836311	3.47482	0.00748137	0.203911
TRIM25	0.0973578	8.0671	0.00748571	0.203911
ALG10B	-0.110761	4.49427	0.00748659	0.203911
ZXDC	0.0667751	6.63699	0.0074927	0.203911
ZZEF1	0.0791543	7.72147	0.00750262	0.203911
LRRC39	-0.126543	-0.0514735	0.00750379	0.203911
CD46P1	-0.167222	0.738261	0.00750564	0.203911
RN7SL7P	-0.46251	-2.06969	0.00750726	0.203911
GIN1	-0.110096	3.57271	0.00754859	0.204884
DEPDC1	-0.237407	-0.10326	0.00757762	0.205389
XKR6	0.0708885	3.57478	0.00758285	0.205389
KIAA0753	0.0553735	4.83627	0.00758633	0.205389
SMPD1	0.0987753	2.52275	0.00758923	0.205389
NAPG	-0.0685478	5.68194	0.00760344	0.205611
PPP1R17	-0.218241	-0.661794	0.00760849	0.205611
AP1AR-DT	-0.143681	0.148767	0.00763514	0.206108
SVBP	-0.109413	3.80175	0.00763792	0.206108
CALM3	0.0793226	5.44967	0.00765386	0.206388
BMI1	-0.108571	4.64553	0.00766588	0.206563
LINC01678	0.206766	-0.52897	0.00770763	0.207538
ZNF48	0.0606595	2.41592	0.00772491	0.207773
RNU6-1255P	0.179275	-1.11884	0.00772919	0.207773
SKP1	-0.0652126	6.80148	0.0077331	0.207773
MIR26A2	0.115496	-0.254517	0.00775231	0.208057
MIR23AHG	0.0982226	7.40942	0.00775483	0.208057
RUNX2	0.0740208	5.6463	0.00777074	0.20826
NDE1	0.094242	6.53706	0.00777738	0.20826
MSL1	0.0682847	8.28867	0.00778221	0.20826
ZNF404	-0.138755	0.610896	0.00778629	0.20826
ZNF22	-0.138425	4.10278	0.00779032	0.20826
WDR11	-0.0649896	6.72169	0.00780192	0.208363
NQO2	0.10617	5.78499	0.0078077	0.208363
MSRA-DT	-0.0853746	1.84571	0.00781253	0.208363
IL2RB	0.146621	4.46879	0.00781653	0.208363
CLDN24	0.385891	-2.47432	0.00782501	0.2084
CEBPG	-0.08531	5.10468	0.00782911	0.2084
LTA4H	-0.0882967	7.93722	0.0078414	0.208578
ZNRD2-DT	0.0731023	1.53425	0.00784758	0.208593
TATDN2	0.0663923	5.06637	0.00785658	0.208596
SPNS1	0.211898	0.0279041	0.00786539	0.208596
NDEL1	0.078463	7.95001	0.00786541	0.208596
CLPTM1	0.102176	3.7148	0.00787009	0.208596
TLNRD1	0.0571057	4.24503	0.00788502	0.208844
ABCC13	-0.175847	3.62581	0.00790838	0.208983
LINC01730	0.139242	0.459388	0.00790924	0.208983
TMEM252	0.121988	2.21373	0.00791678	0.208983
TMEM70	-0.0841594	4.27812	0.00791817	0.208983
CPT1A	0.112049	5.58335	0.00793022	0.208983
RILPL1	0.108146	2.33318	0.00793443	0.208983
PLEKHM2	0.10293	4.33132	0.00794117	0.208983
GMFB	-0.138793	6.04288	0.00794161	0.208983
WWP2	0.0902664	6.52131	0.00794367	0.208983
EHD3	0.113426	3.43621	0.00794634	0.208983
TST	0.0767597	4.03869	0.00795449	0.209049
WDR5B	-0.0988478	4.35637	0.00797387	0.209251
PCLAF	-0.153503	-0.0333362	0.00797546	0.209251
STAT3	0.0867356	7.99187	0.00797901	0.209251
DNAJC15	-0.110079	4.5891	0.0079848	0.209256
MIS18BP1	-0.0992794	6.40817	0.00799838	0.209453
LINC02986	-0.127479	-0.554241	0.00800359	0.209453
CYFIP2	0.0693389	8.11424	0.00803145	0.209982
NEIL1	0.108215	3.03509	0.00803553	0.209982
FBXO44	0.0782505	3.0521	0.00804632	0.209982
TRIM58	-0.186744	9.00828	0.00804823	0.209982
TMEM268	0.103708	3.98521	0.00805475	0.209982
TESK2	0.0575786	3.98711	0.0080576	0.209982
WRAP73	0.0622604	4.40431	0.00809076	0.210699
SSR3	-0.0808393	6.54281	0.00810175	0.210838
MAEA	0.0705536	6.11446	0.00811247	0.21097
NMD3	-0.122424	4.74837	0.00812319	0.211101
PSMA6	-0.0856216	4.42337	0.0081425	0.211455
POLR1D	-0.0815461	6.26136	0.00816462	0.211882
MTCYBP3	0.165848	-0.163923	0.00819008	0.212081
TRDV3	0.222981	-0.74893	0.00820974	0.212081
BAG4	-0.0812498	4.86565	0.00821233	0.212081
PTMS	-0.159895	2.7137	0.00821331	0.212081
RUBCN	0.10612	5.35308	0.0082138	0.212081
MGAT5	0.0620951	6.62374	0.00821417	0.212081
ATP23	-0.0984058	2.38148	0.00821491	0.212081
LINC01948	-0.0981626	2.32614	0.0082259	0.212081
EMP3	-0.0799569	6.51132	0.00823885	0.212081
KRT8P33	0.0945522	3.41255	0.00824146	0.212081
ZMPSTE24-DT	-0.123961	2.37106	0.00824765	0.212081
PPFIA1	0.0676758	6.05893	0.0082518	0.212081
PLCD1	0.0572316	3.73557	0.00825194	0.212081
TRIM74	0.159094	-1.06489	0.00825387	0.212081
LY96	-0.119345	4.32387	0.00825765	0.212081
LIMD2	0.0677445	7.88192	0.00826411	0.212101
TRAM2	0.07993	4.21444	0.00828909	0.212595
RNPS1P1	0.217178	-1.44232	0.00830325	0.212733
FAM106A	0.307883	3.4671	0.00830586	0.212733
LINC02362	0.101411	3.95299	0.00831625	0.212852
CHFR	0.0618157	6.56843	0.0083402	0.213225
TSC22D4	0.14481	4.66238	0.00834223	0.213225
TRPT1	0.0713963	1.9012	0.00835632	0.213438
ATP5F1C	-0.100955	5.27174	0.00836327	0.21347
PHC1P1	0.141567	-0.717292	0.00837857	0.213615
SRM	0.112408	1.51373	0.00839042	0.213615
PPP3R1	-0.100725	7.14944	0.00839368	0.213615
IRF2	0.0635594	6.63939	0.00839826	0.213615
MVB12A	0.131234	1.50895	0.00840205	0.213615
MIR150	0.187824	-1.97192	0.00841044	0.213615
SRP9	-0.130835	5.99228	0.00841189	0.213615
GPR89P	-0.34006	-2.19326	0.00841556	0.213615
SNORA38B	-0.333788	2.44251	0.00842054	0.213615
LINC01737	0.266951	-1.98444	0.00843622	0.213848
VPS50	-0.108003	5.85851	0.0084492	0.213848
DPCD	-0.139761	2.68641	0.00845256	0.213848
RNU6ATAC	-0.394973	2.93008	0.00845269	0.213848
SMIM30	-0.144291	2.36712	0.00847344	0.214227
TMX1	-0.137583	5.82456	0.00849699	0.214583
RNU4-9P	0.278273	-2.34672	0.00850214	0.214583
SRPRA	0.068425	5.88171	0.00851208	0.214583
GJA6P	0.16023	-0.270721	0.00851435	0.214583
RPS12P27	0.122733	0.944018	0.00852035	0.214583
ETAA1	-0.142262	3.96773	0.00852206	0.214583
CCNC	-0.110624	5.28287	0.00854821	0.215081
ALOX12	0.19545	0.886282	0.00855338	0.215081
RAP2A	-0.122509	5.8266	0.0085644	0.215213
SLC6A6	0.0818692	9.07369	0.00859048	0.215723
METTL26	0.0828983	2.27448	0.00859813	0.21577
CEACAM21	0.0548753	4.00293	0.00860524	0.215803
PILRA	0.140857	4.22781	0.00862144	0.216064
RBM7	-0.0800513	4.59053	0.00863603	0.216284
HHEX	-0.0733256	4.65345	0.00865027	0.216495
SLFN12	-0.0956033	4.74399	0.00865682	0.216513
ZFP57	0.384825	0.57903	0.00868073	0.216966
RNU6-7	0.283039	-2.33451	0.00868752	0.21699
SNX15	0.0970463	1.02138	0.00870596	0.217252
RGS13	-0.295973	-1.24389	0.00871417	0.217252
MYO1D	0.0767238	3.40861	0.0087155	0.217252
RPL21	-0.207709	8.14091	0.00872244	0.21728
CASP2	0.0729539	5.90131	0.00873391	0.217381
BTG2	0.101074	5.9462	0.00873819	0.217381
ARHGEF11	0.101972	5.37373	0.00875887	0.217751
RN7SL473P	0.109115	3.57712	0.00878559	0.218269
LY6G5C	0.138721	0.256792	0.0087922	0.218288
SNRPG	-0.119824	3.84508	0.00880559	0.218475
PFDN4	-0.128948	2.22991	0.00881631	0.218595
NUP54	-0.0832564	4.83276	0.00882755	0.218728
NECAB2	0.16743	0.822735	0.00888194	0.21993
SNRPD2	-0.155037	4.92136	0.00889486	0.220104
HECTD2	-0.128116	2.25874	0.00892105	0.220472
ALDH6A1	-0.0536336	3.76915	0.00893003	0.220472
XIST	-0.371735	9.37927	0.00894053	0.220472
SCARNA1	-0.230383	2.01215	0.00894294	0.220472
COX7A2	-0.130273	5.07095	0.00894378	0.220472
TMEM216	0.0593311	3.04267	0.00894524	0.220472
HSPA13	-0.131311	5.00081	0.00895848	0.22052
AHSP	-0.221774	3.95059	0.00895905	0.22052
SOCS4	-0.107159	5.5709	0.0089943	0.221222
RPL27	-0.171726	6.96661	0.00900333	0.221222
DTX2	0.12996	3.30058	0.00900538	0.221222
BDH1	0.0826427	3.47192	0.00904054	0.221928
HEXD	0.104264	3.80485	0.00904601	0.221928
RNU2-42P	-0.153694	-1.63568	0.00906747	0.222308
IPO13	0.09251	2.9402	0.00908921	0.222564
SULF2	0.0885556	7.12335	0.00908985	0.222564
PEAK3	0.178112	2.29155	0.009106	0.222813
OVGP1	0.0970104	1.57546	0.00912025	0.222984
CHTF8	0.0598482	5.31835	0.00912496	0.222984
RHOXF1P1	-0.204299	0.969279	0.00914682	0.223359
TMEM183BP	-0.147951	-0.0489168	0.00915227	0.223359
ZNF500	0.111164	3.07759	0.00917133	0.223612
MAIP1	-0.0750604	2.06721	0.00917901	0.223612
IMPDH1	0.0985017	5.96655	0.00918067	0.223612
CTDNEP1P1	0.156941	0.126906	0.00919363	0.223782
SPACDR	0.1551	-0.636563	0.00920203	0.22384
SIGLEC17P	0.153784	0.643149	0.00921637	0.224008
OSTC	-0.10769	4.60913	0.00922298	0.224008
TTC23	-0.173129	0.833341	0.00923267	0.224008
RAB2B	-0.133551	7.30808	0.00923298	0.224008
ZBTB41	-0.157292	5.1306	0.00924214	0.224084
APOBR	0.116124	6.66091	0.00924813	0.224084
MANBAL	0.0574852	3.71462	0.00925838	0.224156
DDB1	-0.0723342	7.17665	0.00926737	0.224156
VPS54	-0.075832	5.33819	0.0092752	0.224156
ELL2	-0.0667198	4.41766	0.00927969	0.224156
RN7SL535P	0.124205	0.581456	0.00928836	0.224156
RN7SL606P	-0.252226	-0.519637	0.00929137	0.224156
ASXL1	0.0613152	6.43338	0.0092932	0.224156
SLC9A9-AS2	0.189994	-1.39148	0.0093149	0.224231
MAU2	0.104112	5.89331	0.00931637	0.224231
ILK	0.0734655	5.06752	0.00931724	0.224231
RN7SL732P	-0.394131	-2.20506	0.00932038	0.224231
DBI	-0.107299	3.85495	0.00934363	0.224537
IPO7	-0.0733955	6.06601	0.00935037	0.224537
FAM229A	0.121581	2.83289	0.00935121	0.224537
CLNK	0.256262	1.53412	0.00938436	0.224735
ELAC1	-0.0584011	2.8849	0.00938457	0.224735
UBE2Q2	-0.070663	4.75648	0.00939555	0.224735
IL6R	0.0750036	8.61111	0.00940389	0.224735
LSM1	-0.102996	3.96938	0.00941006	0.224735
LGSN	0.268896	0.256439	0.00941229	0.224735
ASB16-AS1	0.116541	2.35909	0.00941588	0.224735
SELENOK	-0.131408	6.02643	0.00941611	0.224735
LINC02899	-0.361659	-0.163338	0.00942554	0.224735
CPNE8	-0.0890852	4.43463	0.00943666	0.224735
PPP2R1A	0.0534546	5.84483	0.00943772	0.224735
PIM1	-0.120459	8.91211	0.00944478	0.224735
MAST3	0.128696	6.47216	0.00944832	0.224735
RAB13	-0.183629	-0.577925	0.0094514	0.224735
RPL7L1P9	0.120825	0.430443	0.00945729	0.224735
TRAM2-AS1	-0.0753864	1.1702	0.00945957	0.224735
ZNF582	-0.0813704	2.15092	0.00946196	0.224735
WASHC2A	0.0604762	5.41707	0.00948041	0.22503
MRPL15	-0.0899422	2.81244	0.00950228	0.225405
FAM90A26	-0.906288	-3.29263	0.00952796	0.225805
THBS4-AS1	0.09404	2.77399	0.00953124	0.225805
MRPL32	-0.115846	4.06848	0.00955017	0.22611
MARCKS	-0.0983236	6.48929	0.0095721	0.226485
LINC00544	0.0964772	1.94535	0.00958053	0.226541
FPGT	-0.136299	4.37978	0.00959354	0.226682
FBXL13	0.122419	4.87767	0.00959868	0.226682
CSNK1G2	0.073795	6.53666	0.0096159	0.226837
MGAT1	0.0601327	7.38077	0.00962749	0.226837
PCDHGC4	0.172186	-0.507315	0.00963687	0.226837
SC5D	-0.0879065	3.81331	0.00963918	0.226837
CREBBP	0.100002	7.31115	0.00964109	0.226837
LINC02610	-0.187038	0.513713	0.00964177	0.226837
WDR55	0.0477627	5.4094	0.00965907	0.226882
ELF4	0.123633	4.94319	0.00966185	0.226882
DGCR11	0.104624	3.42068	0.00966192	0.226882
RDH5	0.128344	1.37058	0.00968316	0.227161
PLEKHO2	0.112301	5.17078	0.00968599	0.227161
ZNF74	0.0597801	3.10594	0.00971564	0.227637
MIR181A1	-0.20716	-1.58333	0.00971852	0.227637
RPS27L	-0.0854352	4.87082	0.00972517	0.227641
RAB11FIP1	0.0758837	8.54172	0.00975033	0.227641
RAB37	0.064615	6.00754	0.00975125	0.227641
TMEM267	-0.0774645	3.73097	0.0097542	0.227641
RN7SL851P	-0.081535	-0.128096	0.00975727	0.227641
E2F1	0.121258	1.19585	0.00975737	0.227641
TBC1D3E	-0.411806	-2.1544	0.00976717	0.227641
TRBV23-1	0.149586	0.130762	0.00977408	0.227641
RPL17-C18orf32	-0.372192	-2.73734	0.00978595	0.227641
ODC1	-0.127363	7.60849	0.00978617	0.227641
ATP5MF	-0.0764947	3.58622	0.00978706	0.227641
LIX1L	0.0602414	5.42014	0.00979198	0.227641
RMDN1	-0.0678597	5.51703	0.00979884	0.227658
TPMT	-0.0912381	3.7166	0.00981771	0.227954
THAP5	-0.111301	5.41983	0.00982654	0.228017
MIIP	-0.070409	5.03646	0.00984869	0.228199
SNX11	0.0611176	5.4527	0.00985241	0.228199
RAB19	0.102099	-0.160033	0.00985274	0.228199
IFITM2	0.123993	7.87098	0.00986022	0.228228
LNCATV	0.108758	3.17374	0.00987091	0.228228
DYNLRB1	0.0652992	3.84962	0.00987235	0.228228
RPL7P26	-0.337258	-1.79879	0.00990786	0.228785
MBOAT7	0.126832	6.05734	0.00990872	0.228785
UNKL	0.0920888	5.57803	0.0099253	0.22899
CD200R1L-AS1	-0.251358	-1.87065	0.00992992	0.22899
TMTC1	0.238681	4.08401	0.00994658	0.229173
KCNA3	0.0814874	5.38394	0.00995316	0.229173
MED7	-0.0962924	4.12128	0.00995882	0.229173
MAP3K3	0.0882529	6.86788	0.00997394	0.229173
GPR75	0.0822688	1.87724	0.00998052	0.229173
KAZN	0.185471	3.01717	0.00998503	0.229173
NFAM1	0.150488	6.58134	0.00998564	0.229173
CNEP1R1P1	-0.193824	-1.53923	0.00999261	0.229173
ZFP69	-0.0525551	2.62494	0.00999319	0.229173
ZNF584	0.0492306	2.34189	0.0100027	0.22925
B4GAT1-DT	0.112405	0.793147	0.0100221	0.229395
C2orf92	0.0917804	2.3696	0.010028	0.229395
FRAT1	0.0778329	6.54252	0.0100355	0.229395
COQ10A	0.0492439	2.72834	0.0100465	0.229395
RHEBP2	-0.150148	-0.661618	0.0100466	0.229395
DEPDC1P2	-0.184694	0.967781	0.0100516	0.229395
PSMC3IP	0.0676744	1.23835	0.0100521	0.229395
GPATCH1	0.0427323	3.74312	0.0100603	0.229442
G6PD	0.111689	4.56777	0.010096	0.230114
RPL36AP16	0.122438	1.14336	0.0101536	0.231287
ZNF813	-0.110086	3.37044	0.0101654	0.231413
SLC41A1	0.0974147	2.71635	0.0101845	0.231702
RGS19	0.0755544	6.01518	0.0101905	0.231702
SUB1P3	-0.362659	-2.55592	0.0102183	0.232191
SIK1	0.263349	-1.42574	0.01025	0.232726
MIR23B	-0.201764	-2.27202	0.0102601	0.232726
SNORA59B	-0.234423	-2.17103	0.0102605	0.232726
LMBRD2	-0.0943132	5.82317	0.0102991	0.233129
LINC02019	0.0882753	1.13729	0.0103006	0.233129
ZNG1E	-0.0909191	5.23399	0.010309	0.233129
LRRC51	0.0923474	0.496787	0.0103131	0.233129
RAC2	0.096697	6.40164	0.0103148	0.233129
SLC25A21	-0.28669	-0.625173	0.0103192	0.233129
KAT2B	-0.0961654	7.95361	0.0103372	0.233129
CCL23	-0.281033	-1.37157	0.0103375	0.233129
PGAP6	0.109979	4.4623	0.0103391	0.233129
GALNT1	-0.107078	5.88302	0.0103434	0.233129
TSHZ1	0.0565492	4.24339	0.0103471	0.233129
TRBV5-6	0.144193	0.689459	0.0103543	0.233149
CYB561D1	0.069597	5.17158	0.0103624	0.233167
SMG1P6	0.127232	2.92335	0.0103787	0.233167
MARCHF9	0.080362	2.97368	0.0103793	0.233167
RABGGTB	-0.0797018	5.93568	0.0103801	0.233167
CASTOR1	0.070834	1.05515	0.0103923	0.2333
PSMD10	-0.101592	4.5539	0.0104065	0.233362
SLC5A6	0.0772675	2.96487	0.0104075	0.233362
TRIAP1	-0.130333	2.39801	0.0104315	0.233758
POLR3D	0.0607123	3.91522	0.0104694	0.234298
TBL2	-0.043182	4.30269	0.0104735	0.234298
ADAM29	0.416305	-1.17157	0.0104744	0.234298
RASSF5	0.0620018	7.70272	0.0104826	0.234315
ZBTB6	-0.114164	5.098	0.0104962	0.234315
DENND5A	0.0755771	7.88156	0.0104968	0.234315
CD74	0.123778	7.28064	0.0105008	0.234315
AGPS	-0.0826077	6.02877	0.0105066	0.234315
KLHDC2	-0.0751197	5.79573	0.01052	0.234472
TRAV8-2	0.0887582	1.01008	0.0105348	0.234567
GCNT2	-0.0767179	4.13745	0.0105368	0.234567
BCL3	0.135815	3.91052	0.0105626	0.234907
CCR2	-0.0942918	7.01787	0.0105647	0.234907
MFNG	0.0816672	5.08737	0.010576	0.235018
CSRNP1	0.0811192	5.09038	0.0106043	0.235359
ZHX3	0.0752099	3.36709	0.0106144	0.235359
LCORL	-0.119507	5.66912	0.0106155	0.235359
ZMYM6	-0.0605962	4.99793	0.0106166	0.235359
AOC3	0.174783	1.87603	0.0106375	0.235683
TRAPPC12	0.0661379	6.41447	0.0106508	0.235836
ZNG1B	-0.0860404	5.59411	0.0106787	0.235997
STIM1	0.0800705	6.11529	0.0106798	0.235997
RAB36	0.132146	1.26243	0.0106833	0.235997
ZDHHC12-DT	-0.130951	-0.402112	0.0106848	0.235997
SUCO	-0.0880472	6.3976	0.0106897	0.235997
CREG1	-0.111759	6.53726	0.010719	0.236318
ZNF335	0.0847635	4.89135	0.010722	0.236318
C2CD2	0.0610046	3.62775	0.0107233	0.236318
RBM14	0.0764362	5.99137	0.0107321	0.236373
MAPKAPK5	0.0436814	5.77034	0.0107411	0.236377
RN7SL288P	0.108378	3.49514	0.010745	0.236377
ZNF92	-0.147615	3.677	0.0107712	0.236814
CDKL5	0.0619502	5.04073	0.0107798	0.236864
ZNF778-DT	-0.0838285	2.29113	0.0107867	0.236876
RAB3D	0.102933	6.74177	0.0108018	0.237067
ZNF559-ZNF177	0.0916624	0.368404	0.0108145	0.237206
BTBD2	0.113424	3.36435	0.0108425	0.237679
ISG20L2	0.0496887	5.1388	0.0108549	0.237812
YPEL1	0.0847404	3.92678	0.0108868	0.238232
SNRNP35	0.0436473	4.75323	0.0108868	0.238232
CSAD	0.108668	4.88031	0.0109104	0.238607
RWDD4P2	-0.103064	0.0301755	0.0109195	0.238655
USP1	-0.118867	5.68337	0.0109366	0.238655
GSPT1	-0.135869	8.56992	0.0109438	0.238655
MANSC1	0.0998884	4.29529	0.0109443	0.238655
MX2	0.100704	7.79851	0.0109522	0.238655
LINC03126	-0.768503	5.80953	0.0109538	0.238655
MIR499B	0.157967	-1.20761	0.0109574	0.238655
LAT	0.15806	1.21253	0.0109826	0.239064
ZNF865	0.169235	2.16469	0.0109897	0.23908
SERPINI2	-0.136637	1.04031	0.0110268	0.239746
LIN7C	-0.111785	5.92869	0.0110362	0.239811
RNASE2	-0.187293	2.48557	0.0110525	0.240018
RN7SL280P	-0.269325	-1.23241	0.0110586	0.240018
SGK3	-0.0572668	5.30476	0.0110671	0.24005
POLR2F	0.0438094	4.14315	0.0110801	0.24005
MYNN	-0.110873	5.16857	0.0110885	0.24005
AASDH	-0.0725873	4.46819	0.0110893	0.24005
BRD8	0.0499962	5.13243	0.0111008	0.24005
NFYC	0.0611364	5.93003	0.0111032	0.24005
FBXL20	0.0710512	6.44139	0.0111075	0.24005
FAM114A2	-0.054252	4.75315	0.0111149	0.24005
RNU7-181P	0.121009	1.12349	0.0111234	0.24005
RN7SL146P	0.107643	-1.00783	0.0111252	0.24005
TMEM222	0.0668952	3.54317	0.0111309	0.24005
CTDSP2	0.096688	7.35381	0.0111737	0.240832
MBOAT2	-0.0881822	6.62628	0.0112142	0.24107
GDI2	-0.0804999	7.34465	0.0112233	0.24107
RPL21P97	-0.291118	-2.41751	0.0112252	0.24107
RN7SL664P	-0.312944	0.721086	0.011227	0.24107
RNU1-91P	0.0927651	-0.0988728	0.011231	0.24107
GRN	0.103978	5.9028	0.0112355	0.24107
PATZ1	0.0591488	4.41308	0.0112416	0.24107
POU6F1	0.102155	2.75113	0.0112488	0.24107
CENPU	-0.0967637	1.48881	0.011249	0.24107
DCTN3	0.0527591	4.61872	0.0112509	0.24107
MICOS10P2	0.107898	-0.0831669	0.0112559	0.24107
POLK	-0.0895334	5.93435	0.011268	0.24119
SLCO3A1	0.0712246	6.78421	0.0113215	0.242196
CLEC4G	-0.208223	-0.538849	0.011349	0.242399
LAPTM5	0.0783207	8.15761	0.0113502	0.242399
RNU6-611P	0.0822982	0.127939	0.0113505	0.242399
CERK	0.0511619	7.21709	0.0113575	0.24241
MT-ATP6	0.192279	3.17312	0.0113779	0.242661
CD48	-0.0895465	7.62615	0.0113823	0.242661
POMK	0.0503168	4.28641	0.011392	0.24273
TRAPPC1	0.0924764	2.97231	0.0114002	0.242766
INTS5	0.0829808	2.95289	0.0114416	0.243496
SUZ12	-0.1058	5.41174	0.0114529	0.243496
PHKA2	0.0700098	5.6109	0.011459	0.243496
FAM86HP	0.107306	0.645939	0.0114654	0.243496
GABPA	-0.104379	5.94582	0.0114672	0.243496
ATP6V0E2-AS1	0.0757751	2.73076	0.0114851	0.243738
RPS18	-0.158194	8.89221	0.0115031	0.24398
PDCD10	-0.109687	5.98956	0.0115174	0.244144
RNA5SP108	-0.139977	-1.50728	0.0115245	0.244156
ATAD2	-0.0749954	4.76041	0.0115394	0.244334
RN7SL491P	0.216099	-1.46926	0.0115514	0.244448
MIR3613	0.183558	-1.69878	0.0115616	0.244527
PDP1	-0.0774272	5.80388	0.011571	0.244585
ZNF142	0.110717	3.65804	0.0115841	0.244725
IL4	-0.201238	-0.686828	0.0115915	0.244742
UBL4A	0.0586013	4.59192	0.0116245	0.2453
C2CD3	0.0555779	5.71273	0.0116449	0.245438
DDA1	0.0767235	3.18301	0.0116511	0.245438
PRDM2	0.0566551	7.00603	0.0116572	0.245438
RPS7P10	-0.263399	-1.36094	0.0116581	0.245438
TMEM106A	0.12154	3.64345	0.0116656	0.245438
TRIM27	0.0546532	6.67898	0.0116783	0.245438
ENPP7P8	-0.20612	-0.426688	0.0116808	0.245438
FAHD1	-0.0896492	4.1075	0.0116957	0.245438
YIPF6	-0.0682226	6.13534	0.0116986	0.245438
CHN1	-0.124096	1.49474	0.0116994	0.245438
CRTAM	-0.112507	2.7652	0.0117035	0.245438
FIS1	-0.112982	6.36513	0.0117163	0.245471
TRIM23	-0.105527	5.892	0.0117183	0.245471
FAM157C	0.124217	5.91348	0.0117563	0.24613
TRIM10	-0.156816	4.33848	0.0117878	0.246541
MT-CO2	0.177206	5.24515	0.0117892	0.246541
ETNK1	-0.11115	7.13882	0.0118132	0.246905
PCNP	-0.0989687	6.09172	0.0118325	0.24717
GSTCD	-0.0550643	3.16149	0.0118767	0.247746
SLC25A36	-0.107377	6.04471	0.0118773	0.247746
TLCD4-RWDD3	-0.100672	1.28901	0.0118804	0.247746
RNU6-1245P	0.156591	-1.91732	0.0118867	0.247746
HCCS-DT	-0.0974119	1.22617	0.011904	0.247968
ZDHHC24	0.0782766	3.83832	0.0119205	0.248039
FBXL9P	0.117623	0.889968	0.0119256	0.248039
ARHGAP1	0.108852	4.42096	0.0119274	0.248039
SIAH2	-0.144634	7.10815	0.0119462	0.248292
NLRX1	0.0906567	3.63176	0.0119609	0.248337
KLHL15	-0.0710009	4.47534	0.0119617	0.248337
MIR941-5	0.264763	-1.90352	0.0119739	0.248452
LNX2	-0.0523622	4.30566	0.0119858	0.24856
LONRF3	0.0598758	3.87549	0.011993	0.248571
MFSD12	0.101841	4.06006	0.0120216	0.249025
PRKCD	0.12274	5.52065	0.012033	0.249123
SYT2-AS1	0.164831	-0.281253	0.0120497	0.24933
THUMPD2	-0.0735684	3.75511	0.0120669	0.249547
MIR6753	0.171809	-0.429931	0.0120795	0.249588
PARD6A	0.0755486	0.621484	0.0120868	0.249588
VTI1B	-0.0772505	6.55579	0.0120889	0.249588
BUB1B	-0.127357	1.03129	0.0121033	0.249625
CYP4F10P	0.157852	0.941004	0.0121041	0.249625
LINC02150	0.162146	-0.0975192	0.0121151	0.249714
AKAP7	-0.10005	3.94512	0.0121285	0.249797
NNT-AS1	-0.0638003	3.08298	0.0121367	0.249797
ARHGAP25	0.0616345	8.53211	0.0121393	0.249797
NARF-IT1	0.110427	1.39925	0.0121532	0.249923
PACS1	0.102056	6.66737	0.0121635	0.249923
C10orf88	-0.068382	3.5441	0.0121655	0.249923
TEX21P	0.0668611	1.90177	0.0121833	0.250151
TRBV30	0.16956	0.4405	0.0122052	0.250254
CHST11	0.0668308	7.55979	0.0122109	0.250254
DYNLT2	-0.101427	1.72419	0.0122145	0.250254
RPL31P46	0.0694892	2.55493	0.0122152	0.250254
CD52	-0.136719	7.18527	0.0122467	0.250309
BTD	0.0466014	4.23669	0.0122483	0.250309
MED21	-0.0708989	4.96651	0.0122607	0.250309
ZNF862	0.0604383	5.29587	0.0122638	0.250309
HACD1	-0.126109	1.10786	0.0122734	0.250309
SLC2A4RG	0.101616	2.74659	0.0122758	0.250309
ARL8BP2	0.0878216	1.44549	0.0122785	0.250309
RRAS	0.10041	0.991338	0.0122807	0.250309
TRBJ2-3	0.106481	1.40698	0.0122818	0.250309
PHB1P13	0.124294	-0.887123	0.0122864	0.250309
RNU1-67P	-0.547542	2.78262	0.0122921	0.250309
CTPS1	0.0508577	4.651	0.0122999	0.250309
TTC33	-0.123	4.20326	0.0123052	0.250309
FAM218A	-0.143127	0.176626	0.0123252	0.250531
NEK3	-0.0551758	2.83647	0.012334	0.250531
SLC9A1	0.154386	2.76745	0.0123363	0.250531
HMOX1	0.0929857	3.47787	0.0123555	0.250563
AP1AR	-0.105146	4.40676	0.0123564	0.250563
HGF	-0.0943347	4.17609	0.012358	0.250563
PRAM1	0.145378	4.17611	0.0123864	0.250896
PPP2R5D	0.0894748	2.86232	0.0123879	0.250896
UQCC6	-0.0643655	2.7328	0.0124002	0.251008
ABL1	0.0768438	3.68231	0.0124235	0.251343
ACTG1P17	0.081094	1.06912	0.0124372	0.251483
DNAJB2	-0.111476	6.61484	0.0124757	0.252033
GHRLOS	0.0979949	4.02802	0.0124779	0.252033
TBC1D14	0.0691383	7.61105	0.0124895	0.25213
DENND1B	-0.0974712	6.15496	0.0125136	0.25248
LINC02210	0.0655652	4.36463	0.0125247	0.25248
C3orf86P	0.109016	3.06976	0.0125334	0.25248
FCGRT	0.0707067	7.21645	0.0125339	0.25248
RNU6-1201P	0.142905	-1.8272	0.0125457	0.252582
ZHX1	-0.0974839	4.82532	0.0125711	0.252761
CFAP58	0.0953022	2.43744	0.0125733	0.252761
CDIP1	0.0919985	3.12773	0.0125809	0.252761
MGAT4B	0.0776312	4.95378	0.0125818	0.252761
NUS1	-0.092058	4.71711	0.012592	0.252831
LAMTOR3	-0.107652	5.21964	0.0126149	0.253024
KLC4	0.0665402	3.37148	0.0126267	0.253024
NSUN3	-0.0868826	6.15766	0.0126281	0.253024
SCAMP2	0.0766346	5.00706	0.0126288	0.253024
TCEANC	-0.0740613	4.45749	0.0126462	0.253098
CD93	0.0979832	8.46938	0.0126474	0.253098
OCEL1	0.12183	0.571705	0.0126572	0.253098
AGAP2	0.0949525	5.09564	0.0126702	0.253098
OGDH	0.0774765	5.75835	0.0126704	0.253098
TMEM209	-0.0542981	3.6064	0.0126733	0.253098
GIMAP2	-0.125555	6.26739	0.0126963	0.25319
EEF1A1	-0.126714	12.0746	0.0126995	0.25319
RPL21P125	-0.22669	-2.27407	0.0126998	0.25319
MACORIS	-0.12184	-1.20572	0.012705	0.25319
WDR36	-0.0785887	5.87997	0.012722	0.253278
GP9	0.149193	2.98553	0.012725	0.253278
CHRNA10	0.0836887	2.05735	0.0127318	0.253278
DRC12	0.09397	1.92467	0.0127366	0.253278
LCE1D	-0.747527	-3.24163	0.012753	0.253469
BTF3L4	-0.0741668	5.27543	0.0127645	0.253519
DVL3	0.109337	3.69205	0.0127745	0.253519
SLC25A46	-0.0952307	6.14519	0.012776	0.253519
PRAF2	0.110298	0.355762	0.0128018	0.253825
CNOT6	-0.0560036	5.9685	0.012805	0.253825
MIR4767	0.155618	-1.76795	0.0128248	0.254082
HPGDS	-0.208916	-0.69429	0.01284	0.254249
TRBJ2-7	0.0927162	0.818773	0.0128622	0.254281
ILVBL	0.0526521	3.28863	0.0128674	0.254281
SLC29A1	-0.177225	2.20831	0.012868	0.254281
JARID2	0.0749592	7.13108	0.012869	0.254281
FAM72A	-0.10203	0.182603	0.0128976	0.25448
CCDC126	-0.100874	4.2465	0.0128997	0.25448
DGAT2	0.0842481	7.02249	0.0128997	0.25448
MIR17HG	-0.124513	4.06903	0.012913	0.25448
ANKRD16	0.0548738	2.29683	0.0129132	0.25448
ZNG1C	-0.0736368	4.37019	0.0129239	0.254556
CCDC18	-0.101896	4.33017	0.0129471	0.254879
SYS1	0.0514956	4.26692	0.0129551	0.254902
ICAM3	0.0687742	8.22895	0.0129821	0.255041
KPNB1	0.0599242	7.73844	0.012985	0.255041
LYPLA1	-0.0729457	5.99837	0.0129886	0.255041
MAN1A1	-0.0770046	7.09111	0.0129966	0.255041
RTEL1P1	0.12284	4.49012	0.012998	0.255041
KDM5B	0.0476254	6.39687	0.0130032	0.255041
FBXO42	0.0488252	5.73309	0.0130319	0.25547
SBNO1-AS1	-0.0996	0.760617	0.0130691	0.256063
FANCB	-0.0967258	2.95032	0.0130778	0.256099
PHLPP2	-0.0663483	4.83246	0.0130961	0.256323
LAMB2P1	0.0738351	1.38345	0.013109	0.256389
IRF8	-0.0723034	6.25065	0.0131132	0.256389
SLC37A4	0.063061	2.76631	0.0131446	0.256533
SDCBP2-AS1	0.0599253	3.30102	0.0131558	0.256533
CAPZA2	-0.129076	7.26976	0.0131606	0.256533
TMEM38B	-0.0755692	3.45354	0.0131636	0.256533
C9orf78	-0.153032	8.01168	0.0131644	0.256533
AMPD2	0.0982272	6.66817	0.0131699	0.256533
NIPAL2	-0.0943592	4.25064	0.0131716	0.256533
GPR15	-0.196945	2.76121	0.0131757	0.256533
ZNF583	-0.107185	2.94134	0.0131958	0.256791
ZNF665	0.0837685	2.37499	0.0132117	0.256863
ATP8A1-DT	-0.131984	-0.625444	0.0132133	0.256863
TRBV11-3	0.205742	-1.64567	0.0132888	0.258072
SLC18B1	-0.0662381	4.63653	0.0132893	0.258072
SPRY2	-0.103399	1.1598	0.0133487	0.259089
RPL39P15	-0.257673	-1.26655	0.0133689	0.259346
NEO1	0.0889654	3.23426	0.013382	0.259466
RPS15AP19	-0.238563	-1.0599	0.0134114	0.259796
DAXX	0.122448	2.48906	0.0134189	0.259796
SCYL2	-0.0650591	6.5811	0.0134199	0.259796
RNU6-466P	0.113728	-0.0858155	0.0134281	0.259819
USP11	0.0754376	3.51104	0.0134413	0.259877
OPA3	0.0691233	3.17842	0.013445	0.259877
PTGES3	-0.097358	5.87729	0.0135019	0.260782
TRIM28	0.0849965	5.05848	0.0135151	0.260782
CCDC50	-0.0931226	5.51415	0.0135195	0.260782
GTF3C5	0.0457726	4.68981	0.0135199	0.260782
PRSS21	0.196395	0.0612956	0.0135329	0.260899
OPRL1	0.0802987	3.13245	0.0135471	0.261038
ZNF574	0.0660223	2.85209	0.0135564	0.261082
LINC02883	0.170531	-1.2947	0.0135637	0.261083
GNAZ	0.130608	3.97438	0.0135727	0.261083
OR7M1P	0.145282	-1.04835	0.0135922	0.261083
MTHFD2L	-0.0829445	4.09829	0.0136033	0.261083
TBC1D3H	-0.758972	-3.44718	0.0136038	0.261083
CLEC4E	0.109547	6.59997	0.0136047	0.261083
CYP1B1	-0.119901	4.96832	0.0136207	0.261083
BATF2	0.224828	0.6295	0.0136223	0.261083
DOCK5	0.0848359	9.17689	0.0136252	0.261083
RALY	0.0592075	6.30939	0.0136343	0.261083
CPSF3	-0.0509543	4.62689	0.0136347	0.261083
SAMD1	0.124261	1.46902	0.0136447	0.261083
PUS7L	-0.0960275	6.00365	0.0136475	0.261083
VPREB1	-0.418813	-2.36827	0.0136831	0.261629
CD69	-0.157767	3.69879	0.0137044	0.261693
EPB42	-0.176204	6.8599	0.0137058	0.261693
LCDR	-0.0892169	1.98471	0.0137075	0.261693
DHX34	0.0893983	6.09379	0.0137282	0.261954
SOWAHC	-0.0986808	1.97149	0.0137363	0.261974
C5orf24	-0.0671264	5.40656	0.013758	0.262223
RPS26P42	0.0859358	1.2724	0.0137656	0.262223
HMGB1P19	0.0920385	0.356294	0.0137847	0.262223
KCNMB3	-0.070339	1.83279	0.0137943	0.262223
DDO	-0.137098	0.510886	0.0138056	0.262223
UBE2D3-AS1	-0.0757898	0.716292	0.013816	0.262223
SGF29	0.0544714	3.23767	0.013822	0.262223
PPP1R26	-0.0816532	2.93762	0.0138313	0.262223
FAM78A	0.0716774	5.97527	0.0138335	0.262223
FXYD6-AS1	-0.153344	0.736303	0.0138345	0.262223
SEMA4D	0.114056	7.91716	0.0138347	0.262223
RPSAP3	-0.218355	-1.54785	0.0138473	0.262223
GPBAR1	0.0866608	2.82149	0.0138488	0.262223
CD79A	0.150372	2.64108	0.0138495	0.262223
RPS21	-0.170651	6.58369	0.0138609	0.262223
ITGA1	0.113632	3.31221	0.0138619	0.262223
KDM2A	0.0653675	7.59626	0.0138754	0.26227
ZBTB40	0.0560171	6.2355	0.013895	0.26227
MRNIP	0.0857714	4.14814	0.0138985	0.26227
ZDHHC12	0.0942755	1.72082	0.0138989	0.26227
LINC03014	-0.0744495	2.50986	0.0139082	0.26227
RERE	0.0854296	6.58664	0.0139257	0.26227
USP10	0.0682556	6.92743	0.0139271	0.26227
SNORA38	-0.281536	1.21539	0.0139314	0.26227
STIMATE-MUSTN1	0.121167	0.263554	0.0139346	0.26227
NINJ1	0.0940344	5.00349	0.0139348	0.26227
HS3ST3B1	0.060174	4.35587	0.0139916	0.263062
RHEB	-0.0532947	4.88332	0.0140011	0.263062
CSNK1G3	-0.109982	5.33806	0.0140016	0.263062
SLC41A2	-0.0872652	1.65808	0.0140051	0.263062
TAF12-DT	-0.106284	0.130547	0.0140392	0.263568
SNORD59A	-0.0967001	-0.910798	0.0140594	0.263815
RNU6-522P	0.126715	1.19397	0.0140903	0.264262
TOR2A	0.102498	2.02799	0.0141051	0.264406
ZNF764	0.0873266	2.23815	0.0141421	0.264456
EIF3J	-0.0730261	5.12557	0.014144	0.264456
ANKRD49	-0.114853	4.68574	0.0141479	0.264456
GNL3	-0.0979925	4.80215	0.0141595	0.264456
STX11	0.0843364	6.22951	0.0141664	0.264456
HLA-DQB1	-0.210673	6.70062	0.0141724	0.264456
RAB24	0.0755295	4.81141	0.0141739	0.264456
CROCCP4	0.217752	-1.79469	0.0141791	0.264456
NCAM1	0.117804	4.15094	0.0141822	0.264456
GLT1D1	0.0856229	6.86991	0.0141825	0.264456
PGLS	0.0739666	4.04958	0.0141858	0.264456
[truncated: 35,267 more rows]

## Sheet: Moderate Stage
ID	logFC	AveExpr	P.Value	adj.P.Val
RN7SL60P	2.87219	-0.156536	2.27415e-104	8.47486e-100
RNU2-36P	-1.7077	-1.92923	1.69941e-42	3.16651e-38
RNU1-83P	-1.48398	-0.394769	2.26666e-37	2.81565e-33
RNVU1-2A	-0.637465	-1.45987	7.5491e-30	7.03312e-26
RNU1-29P	-1.95503	-1.07703	1.28508e-29	9.57797e-26
RN7SL14P	-1.15113	1.60153	3.33993e-25	2.07443e-21
IGLV9-49	0.969347	-1.38574	2.0862e-22	1.11063e-18
KRT79	-0.816179	0.065308	1.19244e-20	5.5547e-17
OR7E115P	-1.18596	-3.03775	6.27482e-18	2.5982e-14
RN7SL678P	-0.854721	-2.41091	1.04626e-17	3.89899e-14
RNU1-18P	-1.26113	-1.96351	2.73346e-17	9.26046e-14
IGLV3-25	0.567515	1.00699	4.19717e-17	1.30343e-13
IGLV5-45	-0.519694	-0.731278	4.57484e-17	1.31143e-13
ADGRG7	1.0775	0.0766691	7.66394e-17	2.04003e-13
LINC00355	1.04457	-0.995968	4.93872e-16	1.22698e-12
WAKMAR2	0.154114	3.4359	1.03155e-15	2.40261e-12
LINC02591	0.745642	-1.88587	4.10188e-15	8.54903e-12
RNU1-88P	-0.930248	-0.556642	4.1293e-15	8.54903e-12
IGKV1D-13	0.828658	-2.21217	4.97361e-15	9.75508e-12
RN7SL277P	-0.732067	-0.152213	2.0692e-14	3.74311e-11
SLA2	0.153504	4.77835	2.1093e-14	3.74311e-11
SYTL3	0.156372	5.75399	2.27157e-14	3.84784e-11
CNTNAP3P2	-0.482159	-0.0746232	1.31869e-13	2.13662e-10
NPIPB8	0.468285	-1.25018	1.68138e-13	2.61076e-10
RN7SL597P	-0.704962	-2.33524	4.99116e-13	7.44002e-10
FMOD	0.897998	-0.693061	5.91125e-13	8.47264e-10
RAP1GAP	-0.633236	2.70421	7.99137e-13	1.10299e-09
CDC42EP2	0.202469	1.09537	9.32145e-13	1.24062e-09
DCLRE1CP1	-0.689414	-2.32065	1.22284e-12	1.5714e-09
CISD2	-0.227645	5.37939	2.17558e-12	2.61986e-09
LGALS2	-0.344923	4.06137	2.17935e-12	2.61986e-09
IGLC7	-0.504261	-1.28484	2.43915e-12	2.84054e-09
CMAS	-0.155817	4.18969	3.1358e-12	3.54117e-09
PGM2L1	-0.14869	4.44228	4.98878e-12	5.468e-09
CEBPD	0.168217	6.76579	5.55908e-12	5.91899e-09
CD300LD	0.480122	-0.0224174	5.8571e-12	6.06307e-09
CTNNAL1	-0.275391	2.9595	7.41399e-12	7.46729e-09
BPGM	-0.280002	7.0631	1.07472e-11	1.05396e-08
TRAV3	0.180176	0.820441	1.61985e-11	1.54783e-08
DUSP1	0.163692	8.55734	2.01392e-11	1.87627e-08
RNU1-67P	-0.939993	2.78262	2.37724e-11	2.16073e-08
RNVU1-2	-0.374318	-1.22237	3.06604e-11	2.72045e-08
LINC00623	0.149791	3.75108	4.481e-11	3.88346e-08
SNORD89	-0.46169	3.08484	6.31788e-11	5.35096e-08
C9orf40	-0.154791	3.20427	7.22428e-11	5.98267e-08
DPCD	-0.214952	2.68641	8.27512e-11	6.70393e-08
TAGAP	0.105431	7.56764	1.02517e-10	8.12847e-08
NUDT4	-0.160138	6.69648	1.64027e-10	1.27346e-07
PITHD1	-0.244892	7.28376	1.69095e-10	1.28602e-07
LINC02506	-0.599917	-1.10745	1.81871e-10	1.35552e-07
CDC42BPA	-0.204424	3.70349	1.96328e-10	1.43458e-07
FOS	0.184164	5.52847	2.00915e-10	1.43986e-07
SEC24AP1	0.452942	-0.859376	2.27147e-10	1.59714e-07
ABHD4	0.11128	4.5189	3.4892e-10	2.40794e-07
MIR646	0.241993	0.0799703	4.33736e-10	2.93884e-07
USP12	-0.197464	6.82978	4.83745e-10	3.21915e-07
KRT1	-0.347465	5.5959	4.99796e-10	3.26761e-07
NCR1	0.171563	3.51866	6.4954e-10	4.17341e-07
LINC01013	-0.317061	0.516321	7.49307e-10	4.73283e-07
MYOM1	0.131634	3.10508	8.05629e-10	5.00376e-07
MRPL10	0.0920852	3.06166	1.03799e-09	6.34128e-07
RERE-AS1	0.136301	2.0874	1.1417e-09	6.86236e-07
CD36	-0.165211	7.41586	1.19626e-09	7.07616e-07
RPIA	-0.179859	6.21116	1.21972e-09	7.10222e-07
PHLPP1	0.0927813	4.34706	1.29986e-09	7.45241e-07
ALG1L13P	0.156117	4.73654	1.36114e-09	7.68552e-07
SNAI3	0.123552	2.72841	1.55633e-09	8.65644e-07
IGHV2-26	0.480511	-0.639175	1.63813e-09	8.97746e-07
RPL31P2	-0.515131	-2.16039	2.05671e-09	1.1108e-06
SLITRK4	-0.169344	2.41627	2.41265e-09	1.28442e-06
TRDJ3	0.203398	0.6335	2.50103e-09	1.31272e-06
RNVU1-32	-0.494358	0.13901	2.56145e-09	1.32576e-06
ROPN1L	0.125655	3.93779	2.69875e-09	1.37769e-06
KLRC2	0.354742	2.70105	2.98072e-09	1.50107e-06
POLR1D	-0.113957	6.26136	3.32175e-09	1.63251e-06
RNVU1-29	-0.603048	3.38476	3.32933e-09	1.63251e-06
MTND3P12	0.200531	1.4718	4.38611e-09	2.12276e-06
LINC02863	0.128331	5.84617	4.9597e-09	2.36959e-06
TRIM27	0.0800507	6.67898	5.06044e-09	2.38712e-06
RNVU1-4	0.156093	1.15665	6.2501e-09	2.91145e-06
VPREB1	-0.59526	-2.36827	6.32824e-09	2.91146e-06
ABCC4	-0.145896	5.63865	6.89987e-09	3.13574e-06
ITPRIP	0.113986	6.90577	7.91856e-09	3.55534e-06
GYPA	-0.269696	3.48808	8.18679e-09	3.63201e-06
CCNL2P1	0.147528	1.58481	8.51348e-09	3.669e-06
MTCO3P23	0.177801	3.17702	8.55553e-09	3.669e-06
OR2T8	-0.311372	-0.883287	8.56554e-09	3.669e-06
PIK3R5-DT	0.136196	0.384745	8.84919e-09	3.74743e-06
INKA2	0.123096	3.81987	8.98328e-09	3.76147e-06
FAM20B	-0.085775	5.64274	9.27324e-09	3.82714e-06
DUSP2	0.180076	3.57855	9.4264e-09	3.82714e-06
RPL29P11	-0.359824	-0.507382	9.44822e-09	3.82714e-06
LINC00892	-0.173565	0.972299	1.03771e-08	4.15821e-06
ERGIC1	0.11357	7.60124	1.12098e-08	4.44409e-06
NFYAP1	0.940182	-2.61998	1.13706e-08	4.4604e-06
SPTA1	-0.21368	4.03056	1.17645e-08	4.56684e-06
ANKRD36BP2	-0.307538	4.87137	1.19969e-08	4.60905e-06
KIAA0040	0.0917636	7.15424	1.28169e-08	4.87383e-06
TFRC	-0.134717	6.65582	1.40431e-08	5.28617e-06
FKBP1B	-0.181864	1.4612	1.46259e-08	5.45048e-06
MKRN1	-0.189122	10.0627	1.54223e-08	5.69037e-06
SIDT1	0.0899868	5.92862	1.73118e-08	6.32492e-06
IGHV3-48	-0.287373	0.552829	1.82422e-08	6.60014e-06
KIF14	-0.217085	2.05637	1.84833e-08	6.62306e-06
BTD	0.0656946	4.23669	1.91308e-08	6.7898e-06
SNX3	-0.158629	7.18095	1.98004e-08	6.96116e-06
RNF14	-0.133738	6.41409	2.06933e-08	7.20705e-06
MTCYBP23	0.228203	2.21855	2.1395e-08	7.38247e-06
RPL29P26	-0.25833	-1.22487	2.24886e-08	7.68864e-06
TNNT1	-0.294273	1.3477	2.45111e-08	8.30392e-06
HLX	0.119546	4.25492	2.55195e-08	8.56764e-06
MTND5P32	0.236733	2.64317	2.6545e-08	8.83238e-06
IGLV3-16	0.394404	-2.07145	2.74997e-08	9.06905e-06
ARSG	0.101399	6.01528	2.85898e-08	9.34584e-06
RNU1-61P	-0.334717	-1.7633	3.01805e-08	9.78004e-06
SPTB	-0.272254	5.93775	3.42194e-08	1.09933e-05
MIR1244-2	-0.194345	-0.458542	3.46191e-08	1.10266e-05
CDCA4P4	0.0995531	2.15583	3.5705e-08	1.12761e-05
PPP1R14BP3	0.164112	2.82762	3.76036e-08	1.17007e-05
DUSP22	0.0677992	6.39359	3.76773e-08	1.17007e-05
MKRN4P	-0.272144	-0.252782	3.80759e-08	1.17115e-05
SMG1P6	0.171778	2.92335	3.86115e-08	1.17115e-05
CDC34	-0.190033	7.73923	3.8923e-08	1.17115e-05
SLC9A9-AS2	0.247538	-1.39148	3.92176e-08	1.17115e-05
XPC-AS1	0.117247	4.89132	3.94013e-08	1.17115e-05
ABCG2	-0.199776	2.43179	3.95976e-08	1.17115e-05
IRF1	0.0944234	9.33091	4.02549e-08	1.17534e-05
OPTN	-0.138623	6.89823	4.07428e-08	1.17534e-05
FCGR2A	0.11132	9.4358	4.08804e-08	1.17534e-05
TM9SF1	0.0682011	2.26164	4.10011e-08	1.17534e-05
LINC01138	0.0888644	5.22763	4.7187e-08	1.33782e-05
MIR23AHG	0.127964	7.40942	4.73871e-08	1.33782e-05
CCDC152	-0.167006	2.33947	4.9494e-08	1.3868e-05
TSEN34	0.0925136	6.2904	5.00501e-08	1.39192e-05
EPPK1	0.189724	3.35058	5.50336e-08	1.51917e-05
GLRX5	-0.215448	7.5296	5.58952e-08	1.53161e-05
SNCA	-0.211242	10.4119	5.77525e-08	1.57095e-05
BBOF1	-0.197521	4.24965	6.14155e-08	1.65849e-05
HCG27	0.104299	7.78568	6.5795e-08	1.76397e-05
TRDJ4	0.186675	0.605532	6.95982e-08	1.8526e-05
TMEM216	0.0768084	3.04267	7.12962e-08	1.88434e-05
LINC00921	0.0894531	5.35999	7.21207e-08	1.88969e-05
TNFAIP1	0.074914	3.86716	7.25128e-08	1.88969e-05
MIR646HG	0.130695	4.34485	7.39033e-08	1.90302e-05
ANP32E	-0.16187	5.63365	7.43573e-08	1.90302e-05
KIR3DL1	0.270812	0.720533	7.45563e-08	1.90302e-05
MIR3945HG	0.188728	2.22927	7.5948e-08	1.92536e-05
KRT77	-0.586665	0.23252	8.41212e-08	2.1178e-05
DNAJC6	-0.222611	4.05393	8.46757e-08	2.1178e-05
RGS19	0.0996961	6.01518	8.58375e-08	2.13255e-05
IFIT1B	-0.240685	5.10926	8.76151e-08	2.1532e-05
GAS2L3	-0.14293	1.61054	8.78243e-08	2.1532e-05
SQLE	-0.0922408	2.90691	8.96218e-08	2.1829e-05
NRF1	0.0659379	5.24671	9.22153e-08	2.20773e-05
TRDJ2	0.18135	0.70025	9.22618e-08	2.20773e-05
STRADBP1	-0.239011	0.558012	9.24182e-08	2.20773e-05
RPL7AP75	-0.184486	-0.677496	9.64847e-08	2.29019e-05
RIOK3	-0.17176	8.6134	9.87083e-08	2.32814e-05
TNFAIP3	0.100524	5.24629	1.00817e-07	2.36291e-05
CLIC2	-0.166454	3.14127	1.04033e-07	2.41534e-05
ZFP36	0.122413	5.7548	1.04361e-07	2.41534e-05
LACC1	-0.133052	2.42576	1.04998e-07	2.41534e-05
LINC02762	0.0996199	3.26145	1.08363e-07	2.47746e-05
RASSF5	0.0813358	7.70272	1.09318e-07	2.48406e-05
IGKV2-30	0.272016	-0.111709	1.13021e-07	2.55262e-05
RNF149	0.0901571	9.64609	1.21281e-07	2.72268e-05
LINC02035	0.117705	4.74603	1.2436e-07	2.7751e-05
RHOU	-0.108192	4.41109	1.27581e-07	2.81818e-05
NEIL2	-0.104556	3.502	1.28324e-07	2.81818e-05
RNU1-148P	-0.624977	-2.48711	1.2856e-07	2.81818e-05
OR7E100P	0.112798	1.2242	1.32098e-07	2.87881e-05
FECH	-0.210144	7.62979	1.33133e-07	2.88449e-05
GCLC	-0.101462	5.5401	1.37349e-07	2.95864e-05
GPR82	-0.207018	1.60342	1.41519e-07	3.03095e-05
STK35	0.0985307	4.95996	1.45352e-07	3.09524e-05
ZXDC	0.0828033	6.63699	1.51183e-07	3.18708e-05
TMEM183BP	-0.184858	-0.0489168	1.51375e-07	3.18708e-05
TMEM45B	0.152943	3.13397	1.52581e-07	3.19444e-05
LITAF	0.111405	9.04159	1.55106e-07	3.20487e-05
ODC1	-0.160821	7.60849	1.55199e-07	3.20487e-05
LRRIQ3	-0.235601	0.603516	1.5566e-07	3.20487e-05
KCTD3	-0.0919985	3.06361	1.57414e-07	3.22318e-05
FRRS1	-0.151233	3.18983	1.59407e-07	3.24615e-05
CENPE	-0.195188	2.21375	1.79939e-07	3.62938e-05
ARHGEF12	-0.157589	7.06793	1.80174e-07	3.62938e-05
BIN3	0.0807694	5.58786	1.83094e-07	3.66838e-05
WDHD1	-0.111604	2.64931	1.86615e-07	3.71892e-05
IGKV6-21	0.3471	-1.78144	1.89132e-07	3.7354e-05
NBPF26	0.193278	6.22296	1.89446e-07	3.7354e-05
NCAM1	0.157656	4.15094	1.96955e-07	3.86133e-05
EIF1AY	-0.208789	4.82358	1.98511e-07	3.86133e-05
CCDC13	0.125274	0.259717	1.98942e-07	3.86133e-05
TENT5C	-0.232063	9.91536	2.00011e-07	3.86197e-05
LATS2	0.0766826	4.59177	2.01148e-07	3.8639e-05
OR2W3	-0.242706	4.02499	2.03576e-07	3.8905e-05
SEC62	-0.133327	7.20384	2.06683e-07	3.92972e-05
MKRN9P	-0.244019	-0.251033	2.14837e-07	4.06402e-05
MXD3	0.10785	5.27555	2.19514e-07	4.13151e-05
PAGE2B	-0.256635	0.934836	2.22533e-07	4.1673e-05
EVPL	-0.277721	1.18788	2.25954e-07	4.21021e-05
SELPLG	0.103532	7.37044	2.28827e-07	4.24252e-05
PTPRO	-0.119962	4.05544	2.33418e-07	4.30621e-05
AHSP	-0.272162	3.95059	2.3846e-07	4.37755e-05
NEBL	-0.53967	2.94007	2.40154e-07	4.38705e-05
BAG1	-0.166589	7.89944	2.51804e-07	4.54531e-05
RNU6-936P	0.129749	0.202234	2.52742e-07	4.54531e-05
TLCD4	-0.186957	4.33144	2.53076e-07	4.54531e-05
PWWP2AP1	0.337469	-1.06924	2.53696e-07	4.54531e-05
RPL35P5	-0.240064	-0.797294	2.58017e-07	4.6006e-05
LONRF3	0.0771076	3.87549	2.64076e-07	4.68623e-05
DNAJA4	-0.151153	5.317	2.77926e-07	4.90861e-05
TRANK1	0.106204	8.83326	2.86844e-07	5.04223e-05
ATP5F1E	-0.170414	6.61061	2.88217e-07	5.04258e-05
SLC23A2	0.0867296	6.03712	2.95758e-07	5.12917e-05
RPS15AP1	-0.257952	-0.412491	2.95919e-07	5.12917e-05
APLF	-0.10157	3.39329	3.02235e-07	5.2144e-05
TRIM58	-0.22385	9.00828	3.07692e-07	5.28408e-05
GET3	-0.103061	4.98513	3.17537e-07	5.38652e-05
KDM2B-DT	0.101692	0.928581	3.17864e-07	5.38652e-05
TUBB2B	-0.463603	-0.661089	3.17993e-07	5.38652e-05
LRRC37B	0.0809125	4.71138	3.30639e-07	5.55234e-05
RPL3P4	-0.149826	1.1478	3.30763e-07	5.55234e-05
CRYBG3	-0.0939238	5.38534	3.32945e-07	5.56391e-05
RNF185	0.0686727	4.9398	3.39517e-07	5.64841e-05
EDIL3	-0.422143	-0.00988914	3.41104e-07	5.6496e-05
RN7SKP296	0.131532	2.16452	3.43917e-07	5.67098e-05
MIR3142HG	-0.101206	2.77996	3.48207e-07	5.71643e-05
KIF15	-0.200097	1.93665	3.54585e-07	5.7956e-05
JDP2	0.086968	5.20132	3.677e-07	5.98371e-05
PRDM8	0.0870667	3.73488	3.82903e-07	6.20403e-05
LINC01278	0.080578	2.72158	3.9827e-07	6.39915e-05
ATP6V0E2-AS1	0.0952983	2.73076	3.9838e-07	6.39915e-05
AP1AR-DT	-0.166839	0.148767	4.02465e-07	6.43703e-05
TSEN54	0.106635	3.52673	4.25719e-07	6.77985e-05
IGLV3-10	0.335669	-1.75068	4.30835e-07	6.82695e-05
MIR6724-4	-0.582394	-1.55118	4.32341e-07	6.82695e-05
AP2S1	-0.100792	5.26951	4.35295e-07	6.8446e-05
C2CD3	0.070138	5.71273	4.45007e-07	6.96791e-05
TAF10	0.0648799	5.06701	4.59482e-07	7.16446e-05
PLSCR4	-0.191685	0.477754	4.66804e-07	7.2483e-05
P2RY1	-0.114991	2.8432	4.77117e-07	7.3777e-05
LINC00570	-0.199316	2.7422	4.82034e-07	7.42292e-05
RPL7P1	-0.3877	-0.0726342	4.85098e-07	7.43936e-05
KNL1	-0.158588	3.12982	4.87133e-07	7.43996e-05
MGST1	-0.103056	2.54614	4.9071e-07	7.46399e-05
PDGFRB	0.218248	1.88378	4.97985e-07	7.54387e-05
ELOB	-0.149405	6.57408	5.00398e-07	7.54973e-05
ORAI1	0.0924816	4.09091	5.17292e-07	7.77314e-05
MEI1	0.0727017	3.89679	5.28815e-07	7.91438e-05
NPC1	0.0923375	5.93814	5.36297e-07	7.96731e-05
RC3H1-DT	0.192225	-0.977505	5.36628e-07	7.96731e-05
TMCC3	0.097674	6.7399	5.47688e-07	8.09926e-05
AREG	0.329606	-0.225638	5.54486e-07	8.16738e-05
RPS3AP49	-0.375477	-1.72419	5.79911e-07	8.50826e-05
CRISP2	-0.337965	-1.22072	5.93228e-07	8.6695e-05
MXI1	-0.168798	7.96952	6.05901e-07	8.82011e-05
TMEM14C	-0.111291	3.90417	6.21544e-07	9.01262e-05
ARL4A	-0.175946	5.06301	6.38661e-07	9.22494e-05
H1-0	-0.223669	4.87964	6.50497e-07	9.35962e-05
MXD1	0.0998499	9.84525	6.82121e-07	9.77689e-05
DCK	-0.109682	6.17097	6.97863e-07	9.9642e-05
PPP1R16B	0.0904079	5.64465	7.06337e-07	9.99866e-05
VNN3P	0.13615	6.94625	7.07288e-07	9.99866e-05
RPL39P3	-0.33288	-0.444375	7.10459e-07	9.99866e-05
ZFYVE27	0.0572871	6.14816	7.13453e-07	9.99866e-05
CTDNEP1P2	0.134897	0.933743	7.13692e-07	9.99866e-05
RAF1	0.0787583	8.11905	7.21482e-07	0.000100699
INTS15	0.0631997	4.65796	7.25993e-07	0.000100951
MAF1	-0.12808	6.98697	7.44072e-07	0.00010308
FSD1L	-0.122568	3.46616	7.53467e-07	0.000103995
KCNA3	0.0985956	5.38394	7.61229e-07	0.000104679
CMTM1	0.0988882	2.66952	7.68191e-07	0.000105248
VCF2	-0.112101	1.99358	7.87019e-07	0.000107432
TAF3	0.0560018	3.72654	8.01039e-07	0.000108947
ERI2	-0.0844574	2.69006	8.1224e-07	0.000110069
PAIP1P2	-0.170972	0.203989	8.32515e-07	0.000112408
SH2D2A	0.189517	2.3945	8.67924e-07	0.000116695
CCNJL	0.138398	5.67721	8.70531e-07	0.000116695
SMARCD1	0.0662066	4.47097	8.76509e-07	0.000117075
SLC7A5P1	0.0880725	1.67314	8.84559e-07	0.000117728
DUXAP1	0.233027	-1.15788	9.39824e-07	0.000124639
SPON2	0.165072	4.57089	9.47535e-07	0.000125216
NEDD9	0.0945674	7.73739	9.57082e-07	0.00012559
STX11	0.106809	6.22951	9.57109e-07	0.00012559
SIPA1L1	0.0992509	7.65816	9.63203e-07	0.000125946
TXNDC11	0.0638322	4.90111	9.8402e-07	0.000128218
PXDNL	0.16467	1.05087	9.91201e-07	0.000128704
IGHG2	0.279989	1.41133	1.0134e-06	0.000131129
SECTM1	0.136308	5.96195	1.01769e-06	0.000131229
SLC12A6	0.0826296	8.62715	1.02649e-06	0.000131684
CXCR1	0.115404	8.24659	1.02829e-06	0.000131684
SPECC1	-0.12629	7.41288	1.03266e-06	0.000131792
MSMO1	-0.103683	3.98761	1.03768e-06	0.000131981
XK	-0.206349	6.1143	1.0421e-06	0.000132091
PFKFB4	0.102915	6.41257	1.04635e-06	0.000132181
CHILL1	0.125156	2.60803	1.05583e-06	0.000132856
RABIF	0.0562704	4.03696	1.06204e-06	0.000132856
PHC2	0.142914	6.38446	1.06239e-06	0.000132856
NMUR1	0.161215	2.89427	1.06676e-06	0.000132956
GFUS	-0.159135	4.83335	1.08384e-06	0.000134635
CELF2	0.0746753	9.12722	1.09502e-06	0.000135572
ECH1	0.0868673	3.44872	1.13161e-06	0.000139638
VRK1	-0.155248	4.78841	1.13854e-06	0.00014003
RHAG	-0.188585	2.2492	1.14616e-06	0.000140503
CCDC18	-0.123793	4.33017	1.15221e-06	0.000140617
TMEM9B	-0.0846506	5.49299	1.15464e-06	0.000140617
RBBP8	-0.119212	3.34271	1.18096e-06	0.000143354
ERVK3-1	0.0719897	4.97008	1.18962e-06	0.000143936
SRRD	-0.126251	5.08771	1.19848e-06	0.000144262
TSC22D3	0.105973	7.57132	1.20006e-06	0.000144262
RN7SL239P	0.0814819	2.58582	1.21514e-06	0.000145605
LYPD2	-0.227046	-0.0724404	1.28489e-06	0.0001526
STX3	0.0971616	7.64546	1.28552e-06	0.0001526
ARHGAP11A	-0.122375	2.69395	1.28698e-06	0.0001526
LINC03014	-0.0910168	2.50986	1.28989e-06	0.0001526
RNU6-466P	0.139748	-0.0858155	1.30828e-06	0.000154286
IFT52	-0.0747401	3.70395	1.31612e-06	0.000154366
IDS	0.0911557	7.1936	1.31724e-06	0.000154366
FAM13A-AS1	0.0864589	6.43667	1.33874e-06	0.000156393
LINC02218	0.126012	3.54348	1.35215e-06	0.000157467
COPS3P1	0.440939	-1.51012	1.37139e-06	0.000159209
VPS26B	0.070523	5.56734	1.40156e-06	0.000162207
EPB42	-0.213708	6.8599	1.43245e-06	0.000164881
B4GALT1	0.090884	6.1021	1.44003e-06	0.000164881
IFRD2	-0.0929317	3.8674	1.44063e-06	0.000164881
ALG12	0.0759618	3.87955	1.44237e-06	0.000164881
ARMC7	0.0907438	2.98754	1.44761e-06	0.000164975
TREML2	0.0960846	5.86942	1.45883e-06	0.000165746
HLA-F-AS1	0.103241	3.00217	1.48012e-06	0.000167654
TMEM252	0.140786	2.21373	1.4899e-06	0.00016825
TGFBR2	0.0630151	8.58108	1.49992e-06	0.000168596
MIR26A2	0.130852	-0.254517	1.50201e-06	0.000168596
IGHV2-5	-0.147975	0.850986	1.535e-06	0.000171724
C1QTNF7-AS1	0.182165	0.570518	1.53909e-06	0.000171724
XIST	-0.428499	9.37927	1.54763e-06	0.000172161
FCAR	0.116747	5.37665	1.55854e-06	0.000172646
CHST11	0.080967	7.55979	1.56521e-06	0.000172646
PPP1R17	-0.241821	-0.661794	1.56589e-06	0.000172646
RFFL	0.0759272	6.62815	1.60299e-06	0.000176215
ARL6IP1	-0.116404	6.66833	1.61872e-06	0.00017714
CTCF-DT	0.0915584	1.4554	1.62091e-06	0.00017714
BARD1	-0.10154	4.23848	1.63664e-06	0.000177834
PSMD6-AS2	0.0892909	5.70276	1.6368e-06	0.000177834
RNF19B	0.0911627	5.80851	1.65718e-06	0.000179184
BRIP1	-0.108858	3.06289	1.65884e-06	0.000179184
EVA1C	0.100729	2.92124	1.68663e-06	0.000181658
JUNB	0.0978226	7.2783	1.70539e-06	0.00018315
VWA8-AS1	-0.398634	-1.61829	1.74077e-06	0.000186412
HCCS-DT	-0.114736	1.22617	1.80538e-06	0.000192777
IGKV3D-20	0.276992	-1.32905	1.8248e-06	0.000194294
RPL41P5	-0.230864	-0.358623	1.85083e-06	0.000196504
PGP	0.0724296	4.07526	1.86671e-06	0.000197627
LINC02772	-0.219899	1.51178	1.87395e-06	0.000197832
IP6K1	0.097545	5.81174	1.8803e-06	0.000197941
RNU6-181P	0.145653	0.262029	1.89209e-06	0.000198622
DOCK5	0.103702	9.17689	1.90303e-06	0.000199208
FAM157B	0.150071	4.66497	1.91391e-06	0.000199786
GUSBP9	0.171933	0.868701	1.92001e-06	0.000199864
XPO6	0.0935666	9.65518	1.94e-06	0.000201381
LMTK2	0.0935732	6.21351	1.95415e-06	0.000202287
NUP214	0.057954	6.93416	1.98944e-06	0.00020537
MIR8075	0.266629	-1.99334	2.00329e-06	0.000206228
RPL7P9	-0.379965	1.03772	2.01068e-06	0.000206419
SMAP2	0.10539	8.53287	2.02343e-06	0.000206993
IGKV3-15	0.237427	1.50768	2.02738e-06	0.000206993
CSRNP2	0.0617375	4.28849	2.0393e-06	0.000207641
RHEBP2	-0.169911	-0.661618	2.05318e-06	0.000208485
RNU5D-1	-0.319072	-1.61552	2.14801e-06	0.000217521
RNU5F-1	-0.2272	-0.188179	2.15984e-06	0.000218127
RPL17P6	-0.320394	-0.989447	2.16794e-06	0.000218353
HTRA2	0.0569393	4.78484	2.18708e-06	0.000219686
CCS	-0.0934971	5.06304	2.19587e-06	0.000219794
TFDP1	-0.124982	5.94856	2.20493e-06	0.000219794
KIR2DL3	0.211185	-0.143256	2.20585e-06	0.000219794
TMEM185B	0.0749053	4.315	2.24864e-06	0.000223461
PLEKHM3	0.0744378	6.04065	2.25837e-06	0.000223831
SYS1	0.0616574	4.26692	2.27768e-06	0.000225146
WDFY4	0.129441	7.20699	2.29475e-06	0.000226233
ZNF747	0.0623573	2.8316	2.35382e-06	0.000231445
PCTP	-0.103529	5.55123	2.37318e-06	0.000232734
DZIP3	-0.122107	4.60731	2.38995e-06	0.000233764
IL12RB2	0.144889	2.60593	2.41402e-06	0.0002355
RALGAPA1P1	-0.117245	1.99332	2.42127e-06	0.00023559
ZNF516	0.0999297	7.55868	2.49626e-06	0.000242254
SIAH2	-0.168332	7.10815	2.51137e-06	0.000243087
CA4	0.134008	3.63261	2.5323e-06	0.000244479
CASS4	0.086365	5.86495	2.56164e-06	0.000246442
MIR7848	0.0922468	3.05996	2.56586e-06	0.000246442
JSRP1	-0.137072	1.9884	2.60999e-06	0.000250036
LIPC-AS1	0.181175	0.673725	2.62801e-06	0.000251116
SETP14	-0.149005	0.242168	2.65547e-06	0.000253092
RPS18P9	0.0603932	2.65804	2.79244e-06	0.000265467
GZMB	0.149908	5.44086	2.83922e-06	0.000269228
NCF1	0.11811	7.21097	2.92356e-06	0.000276522
SLC49A4	0.0778592	5.66305	2.94357e-06	0.000277709
TRBV10-2	0.289121	-1.26583	2.95641e-06	0.000278216
ZZEF1	0.0874013	7.72147	2.97159e-06	0.00027894
CRADD	0.0586526	4.0342	2.98418e-06	0.000279418
CKB	-0.140725	1.1955	3.04259e-06	0.000283763
MKNK1	0.0916806	6.59933	3.04581e-06	0.000283763
CA3-AS1	-0.185684	0.772815	3.12161e-06	0.0002901
ZNF487	0.0695518	3.95674	3.14863e-06	0.000291882
PPP1R12B	0.109382	7.7255	3.17689e-06	0.000293772
LEAP2	0.0652876	1.68546	3.18853e-06	0.000293983
RN7SL5P	-0.394704	7.46843	3.19495e-06	0.000293983
TNFRSF10C	0.10374	7.61801	3.20873e-06	0.000294523
RNU4-1 /// RNU4-3P /// RNU4-4P /// RNU4-5P /// RNU4-6P /// RNU4-7P /// RNU4-8P	0.118214	-0.408734	3.24314e-06	0.000296269
HMGB1P6	-0.184957	1.21758	3.24365e-06	0.000296269
ZNF888	-0.10739	3.22364	3.26861e-06	0.000297325
RNU6-37P	0.137001	-0.543374	3.27116e-06	0.000297325
MBP	0.0776174	8.47083	3.29047e-06	0.000298352
GPC4	-0.333428	-0.448295	3.30207e-06	0.000298677
APPL2	0.0657443	5.9896	3.34415e-06	0.000301751
ABCB10	-0.0919064	5.7051	3.37214e-06	0.000303256
PRF1	0.153027	6.04453	3.37711e-06	0.000303256
RPL21P16	-0.305105	1.5518	3.41378e-06	0.000305812
RNU6-1 /// RNU6-50P	0.121838	1.43469	3.43956e-06	0.000306736
SPTSSA	-0.104765	3.22482	3.44055e-06	0.000306736
AVPI1	0.114145	0.409499	3.47025e-06	0.000308645
PPM1D	0.049674	4.84527	3.4913e-06	0.000309668
PLBD1-AS1	0.112651	2.68859	3.50025e-06	0.000309668
HNRNPA1L3	-0.152049	0.945192	3.50668e-06	0.000309668
C16orf54	0.0878808	6.73398	3.56392e-06	0.000313979
IGF2BP2	-0.173294	4.91676	3.65307e-06	0.000320808
GPR55	-0.125962	2.06709	3.65865e-06	0.000320808
DCUN1D1	-0.130007	7.29682	3.72929e-06	0.000326234
RNVU1-6	-0.288813	-2.0343	3.76423e-06	0.000328519
NCF1B	0.104704	6.1304	3.7832e-06	0.000329404
CEBPA-DT	-0.103275	1.55685	3.80458e-06	0.000330493
CEBPB	0.0927129	7.34324	3.82765e-06	0.000331724
INPP5A	0.070113	5.17704	3.92586e-06	0.000339445
LILRA2	0.0969971	6.29024	3.98706e-06	0.000343939
NACA3P	-0.181343	0.159439	4.00025e-06	0.00034428
MAML3	0.103553	4.61758	4.07448e-06	0.000349861
PFDN5	-0.18362	6.14366	4.13403e-06	0.000354158
LTB4R	0.0905679	5.74199	4.15755e-06	0.000354931
PRRG4	0.122958	5.46047	4.17042e-06	0.000354931
ZNF559-ZNF177	0.102543	0.368404	4.17163e-06	0.000354931
KIAA2013	0.0722964	5.37762	4.26906e-06	0.000362247
SNORD3B-1	-0.365958	0.704959	4.27705e-06	0.000362247
PRKAB1	0.0505679	5.07049	4.31505e-06	0.000364636
RAB24	0.0894627	4.81141	4.40079e-06	0.000371041
TANC2	0.0794289	5.67841	4.43791e-06	0.000372795
TRAK2	-0.119355	7.53259	4.44929e-06	0.000372795
COG8	0.0493464	5.08762	4.45161e-06	0.000372795
SRP9P1	-0.205782	-0.775544	4.50592e-06	0.000376497
RNU6-313P	0.230604	-1.39703	4.5433e-06	0.000377725
RNU6-638P	0.0893006	2.99023	4.54598e-06	0.000377725
SMIM5	-0.159092	4.50978	4.55103e-06	0.000377725
RNU6-1062P	0.125426	1.46206	4.5623e-06	0.00037782
LNPK	-0.0935624	5.72025	4.59772e-06	0.000379884
NUAK2	0.109851	5.93564	4.60761e-06	0.000379884
LILRA1	0.0958365	5.78724	4.63318e-06	0.000381148
TTC38	0.101126	5.06444	4.65004e-06	0.000381446
RN7SL408P	-0.330196	-1.76653	4.65727e-06	0.000381446
TRBV7-3	-0.165085	0.203756	4.67961e-06	0.000382435
SLC9A9-AS1	0.192965	-0.211606	4.70872e-06	0.00038373
CSRNP1	0.092097	5.09038	4.71604e-06	0.00038373
UNC119B	0.0615151	4.6716	4.79677e-06	0.000389447
FRAT1	0.0874104	6.54252	4.84088e-06	0.000392175
RN7SL473P	0.120741	3.57712	4.87592e-06	0.000393636
KLHL21	0.0988405	6.08637	4.88411e-06	0.000393636
EMP3	-0.0863516	6.51132	4.89061e-06	0.000393636
SIGLEC10-AS1	0.157082	0.564439	4.91748e-06	0.000394946
YIPF1	0.0602602	4.55945	4.96685e-06	0.000398053
ITPKB-IT1	0.100013	3.42076	5.00357e-06	0.000400135
MAML1	0.105426	5.88874	5.03782e-06	0.000401726
PLCG2	0.0814098	7.67649	5.05416e-06	0.000401726
IGHG1	0.241883	1.35238	5.0558e-06	0.000401726
ACTA2-AS1	0.0965534	3.46023	5.07106e-06	0.000401822
TPT1P6	-0.259883	-1.69749	5.0849e-06	0.000401822
EEF1A1P8	-0.196892	-0.367322	5.08935e-06	0.000401822
MIR3609	-0.310916	5.57726	5.138e-06	0.000404804
IGHA2	0.291533	0.597789	5.15319e-06	0.000405145
CUL4A	-0.0617808	6.80251	5.21175e-06	0.000408887
GPX3	0.201439	0.0911252	5.33847e-06	0.000417553
ERN1	0.103175	6.89105	5.35464e-06	0.000417553
SVBP	-0.11614	3.80175	5.35583e-06	0.000417553
TPTEP2-CSNK1E	0.102563	0.381421	5.38099e-06	0.000418639
IGLV3-21	0.274141	1.65723	5.40071e-06	0.000419297
RAB43	0.0770066	3.87933	5.42937e-06	0.000420646
THBD	0.126685	5.01711	5.45109e-06	0.000421453
PATL1	0.0852641	5.22351	5.48659e-06	0.00042332
KDM5B	0.0549192	6.39687	5.52275e-06	0.000424854
ARRDC4	0.124033	4.26626	5.52929e-06	0.000424854
THEMIS2	0.0856429	8.41718	5.55602e-06	0.000425656
SP110	0.0880212	7.5881	5.56256e-06	0.000425656
FAM157C	0.142274	5.91348	5.60522e-06	0.000428041
MINPP1	-0.105316	3.33375	5.63414e-06	0.00042937
SRSF8	-0.0726008	5.80163	5.71418e-06	0.000434276
PHF12	0.107146	6.19076	5.72182e-06	0.000434276
TRIM66	0.110962	5.09279	5.73606e-06	0.000434472
ZNF501	-0.125465	2.23244	5.78686e-06	0.00043743
ABHD15	0.0613557	4.40514	5.80598e-06	0.000437987
SNORA20	-0.363942	0.312672	5.8501e-06	0.000438747
HMGCS1	-0.075796	4.66316	5.85559e-06	0.000438747
P2RX1	0.133727	4.78563	5.85604e-06	0.000438747
MIR545	0.104975	-0.25221	5.86315e-06	0.000438747
OR10AA1P	0.125963	-0.152554	5.87618e-06	0.000438841
PLEKHG3	0.1069	7.77322	5.88956e-06	0.000438961
SOCS6	-0.0946296	2.97833	5.91962e-06	0.000440321
RPL13AP15	0.098821	2.10962	5.94856e-06	0.000441591
KLC3	-0.204016	3.78741	5.96185e-06	0.000441699
LNCATV	0.121046	3.17374	6e-06	0.00044336
CD2AP	-0.103028	5.63481	6.00807e-06	0.00044336
ATP5F1EP2	-0.245933	-1.66951	6.0787e-06	0.000447685
ZG16B	-0.162363	-0.0650829	6.10139e-06	0.00044847
KCTD21	0.0803691	3.25507	6.12594e-06	0.000448757
NR2C2	0.0715655	6.99117	6.12938e-06	0.000448757
SLC22A15	0.0861244	6.44025	6.16262e-06	0.000450307
TDRD12	-0.328141	0.519102	6.2157e-06	0.000453296
FCGR1BP	0.164669	4.76295	6.2365e-06	0.000453402
DCUN1D3	0.0587584	3.71488	6.2514e-06	0.000453402
RN7SL600P	0.0982264	4.30371	6.25365e-06	0.000453402
ABCG1	0.123057	5.3091	6.27558e-06	0.000454108
THBS4-AS1	0.102864	2.77399	6.28892e-06	0.000454192
CCNL2	0.0581615	7.24727	6.31367e-06	0.000455097
RNU6-759P	0.0930369	1.12616	6.37609e-06	0.000458075
AP5B1	0.127226	6.54643	6.37957e-06	0.000458075
C3orf86P	0.125216	3.06976	6.41641e-06	0.000459834
IGKV1D-39	0.359932	-1.99118	6.4292e-06	0.000459867
PISD	0.104461	6.44161	6.46544e-06	0.000461573
IGKV1-39	0.288415	-1.06885	6.54412e-06	0.000466119
PITPNC1	0.0533936	5.97543	6.55413e-06	0.000466119
TRAPPC14	0.0897623	5.24471	6.57518e-06	0.000466491
LINC01806	-0.131891	2.58953	6.58441e-06	0.000466491
FBXL20	0.0796455	6.44139	6.61998e-06	0.000468122
CR1L	-0.157342	3.73988	6.65138e-06	0.000469452
LINC02948	0.27102	-2.1604	6.68485e-06	0.000470921
RPL6P30	-0.252371	-1.65468	6.71527e-06	0.000472172
ALOX5AP	0.107174	6.97604	6.75703e-06	0.000472838
LRRC61	0.0852044	2.17959	6.75925e-06	0.000472838
NOD2	0.125212	5.96153	6.7628e-06	0.000472838
CNNM2	0.0657542	4.11407	6.79727e-06	0.00047349
RAB2B	-0.143509	7.30808	6.79754e-06	0.00047349
CFLAR	0.0700458	10.3951	6.81852e-06	0.000474065
PPP1R15A	0.0925796	5.11417	6.9164e-06	0.000479252
WDR12	-0.045087	3.97161	6.91885e-06	0.000479252
GCNT2	-0.083874	4.13745	6.97655e-06	0.000482353
STS	0.0746004	3.22775	6.99027e-06	0.000482406
CYTH1	0.0692474	8.52169	7.01017e-06	0.000482885
ZNF658	-0.124243	2.50756	7.28034e-06	0.00050057
FUNDC2	-0.0898011	4.81834	7.3263e-06	0.000502803
KLF6	0.0671071	8.22843	7.36239e-06	0.000504351
DYNC2LI1	-0.100876	1.78514	7.43408e-06	0.000508328
RN7SKP16	0.127952	3.64191	7.71812e-06	0.000526783
TMEM115	0.0659992	3.54608	7.77669e-06	0.00052981
RPS14P5	0.163607	0.165746	7.81395e-06	0.000530063
IGHV3-22	0.343489	-1.97989	7.81906e-06	0.000530063
RN7SKP292	0.128642	1.26508	7.82307e-06	0.000530063
SOX6	-0.155811	4.95143	7.86659e-06	0.000532044
SNX19	0.0603885	6.9029	7.90091e-06	0.000533397
LINC01242	0.612986	-2.23904	7.96008e-06	0.00053642
RPS15AP11	-0.260418	-2.1061	7.98089e-06	0.000536851
HAGH	-0.15311	7.49141	8.02804e-06	0.000538683
ERG28	0.0516436	2.62377	8.03703e-06	0.000538683
TSPAN13	-0.126616	2.62817	8.0668e-06	0.000539591
GCAT	-0.227874	2.43082	8.07953e-06	0.000539591
EYA3	0.0635318	5.27456	8.10736e-06	0.000540481
MCTP2	0.0894578	8.49784	8.16582e-06	0.000543406
TMEM222	0.0740196	3.54317	8.22236e-06	0.000546194
CLEC4G	-0.22454	-0.538849	8.27102e-06	0.000548448
NDUFB8P2	0.155563	-0.921446	8.40272e-06	0.000555739
AKTIPP2	-0.237682	-1.5226	8.4182e-06	0.000555739
CCR5AS	-0.161325	1.2675	8.43702e-06	0.000555739
HECTD2	-0.133542	2.25874	8.44063e-06	0.000555739
NFRKB	0.0725154	5.10029	8.47434e-06	0.00055642
SHISA5	0.0977799	6.23853	8.48083e-06	0.00055642
ZNG1A	-0.0920014	4.8647	8.58903e-06	0.000562529
PCIF1	0.0778126	5.12468	8.61274e-06	0.000563092
ABTB3	0.0840318	4.41731	8.78171e-06	0.000573133
SELENOK	-0.139815	6.02643	8.81123e-06	0.000574054
EZH1	0.0623526	6.44536	8.83004e-06	0.000574276
IMPACT	-0.0779058	4.1878	8.85551e-06	0.00057493
PARPBP	-0.103359	2.33705	8.87712e-06	0.00057533
RHBDD1	-0.0739681	5.84505	8.97668e-06	0.000580772
RPL23P8	-0.293426	-1.48054	9.09989e-06	0.000587724
ATXN7	0.0668364	5.18525	9.12809e-06	0.000588525
IGHD3-22	0.43274	-2.70372	9.27938e-06	0.000597246
DNA2	-0.0930729	3.44413	9.33806e-06	0.000599987
PLEK2	-0.169419	4.12708	9.43565e-06	0.000604493
NME2	-0.152046	0.594387	9.44064e-06	0.000604493
NCAPG	-0.208174	1.53278	9.50588e-06	0.000607626
SESN2	0.10043	2.75108	9.5788e-06	0.000610809
HMGXB3	0.0559205	5.37922	9.58845e-06	0.000610809
UNKL	0.100011	5.57803	9.6244e-06	0.000612053
BCAS3	0.0542067	6.12575	9.68919e-06	0.000615123
RPS7P1	-0.294429	0.0776821	9.76277e-06	0.000617925
PHF8	0.0652684	5.85489	9.76649e-06	0.000617925
TPST1	0.151898	4.22324	9.7907e-06	0.000618407
SNORD62A	0.149559	-1.30258	9.81607e-06	0.00061896
ACTR3C	0.0647919	4.18682	9.86083e-06	0.000620733
RPL9P18	-0.287072	-1.15067	9.88297e-06	0.000621077
POMK	0.0552291	4.28641	9.91208e-06	0.000621858
CNTLN	-0.0838505	3.86832	9.9315e-06	0.000622029
NDEL1	0.0823962	7.95001	1.0041e-05	0.000627835
NHSL2	0.115818	7.396	1.01257e-05	0.000632068
FOSL2	0.103642	7.35632	1.02895e-05	0.00064122
PHF1	0.0827245	4.5348	1.03446e-05	0.000643574
DDB1	-0.0765123	7.17665	1.03632e-05	0.000643595
ELMO1	0.0752364	7.54327	1.03795e-05	0.000643595
RPS15AP38	-0.244593	-1.03396	1.05521e-05	0.000653213
BNIP3L	-0.15533	10.4291	1.07092e-05	0.00066184
PRCC	0.0587897	3.92951	1.07657e-05	0.000664229
ZNF574	0.0739692	2.85209	1.07948e-05	0.000664925
PDK3	0.0704104	6.12639	1.08655e-05	0.000668173
MASTL	-0.0914917	3.99597	1.09563e-05	0.000672648
MORN2	-0.150875	-0.649497	1.10249e-05	0.000675592
EEF1A1P38	-0.19749	0.0292312	1.10405e-05	0.000675592
IP6K2	0.047996	5.4475	1.10845e-05	0.000677174
SERPINA1	0.111446	7.68	1.11801e-05	0.000681894
MIR4698	0.182839	-1.20045	1.12209e-05	0.000683252
POLE2	-0.188555	2.30012	1.1239e-05	0.000683252
ABCC13	-0.1803	3.62581	1.12658e-05	0.000683763
NOXRED1	0.0641685	1.86765	1.12889e-05	0.000684052
C2orf69	-0.0997532	3.77604	1.13922e-05	0.000689191
TRIM36	-0.139528	1.38415	1.1515e-05	0.000695489
TSPO2	-0.192144	1.23358	1.16232e-05	0.000700891
BMAL2	-0.157217	1.1926	1.16629e-05	0.000702146
NFYC	0.0665403	5.93003	1.18137e-05	0.000710078
ERBB2	0.136794	2.93403	1.19807e-05	0.000718957
LNX2	-0.0568204	4.30566	1.20123e-05	0.000719696
LINC00654	0.117463	2.4773	1.21007e-05	0.000723828
MRPS16	-0.0557312	5.6054	1.24105e-05	0.00074117
GLT1D1	0.0965831	6.86991	1.24364e-05	0.00074153
LINC02980	0.0886521	2.87609	1.26095e-05	0.0007484
SLC6A6	0.0861206	9.07369	1.26111e-05	0.0007484
GPATCH1	0.0454923	3.74312	1.26119e-05	0.0007484
HAL	0.0908555	6.60399	1.2664e-05	0.000750297
USF1P1	0.0896479	1.82482	1.27011e-05	0.000751299
GEMIN4	0.0556071	3.99926	1.27443e-05	0.000751872
RN7SL124P	0.160865	0.356786	1.27511e-05	0.000751872
ZNG1DP	-0.141281	0.846	1.28007e-05	0.00075196
CBX4	0.0673908	4.1239	1.28305e-05	0.00075196
TRGV7	0.125962	2.01404	1.2831e-05	0.00075196
SNAP29	0.0595141	4.78921	1.28333e-05	0.00075196
GBA2	0.0770228	5.53529	1.2897e-05	0.000754503
TBC1D14	0.0762713	7.61105	1.30414e-05	0.000761758
TMEM140	0.084196	7.30682	1.31854e-05	0.000768965
RN7SL434P	0.0848666	0.467328	1.32628e-05	0.00077227
ST20-AS1	0.0757891	3.06908	1.3321e-05	0.000774447
ZDHHC18	0.0978618	7.67625	1.36424e-05	0.000791151
SNORD12B	0.0894705	2.41528	1.36508e-05	0.000791151
ACP6	0.0726027	4.29762	1.37142e-05	0.000793592
NCOA1	0.0706822	7.79023	1.38541e-05	0.000800445
STK11	-0.0936011	6.85917	1.39177e-05	0.000802872
DGAT2	0.0932006	7.02249	1.39654e-05	0.000804378
KIR3DL2	0.202992	0.299968	1.39928e-05	0.000804716
TMEM71	0.0764032	7.53512	1.40552e-05	0.000807058
ZMAT2	-0.131129	6.68281	1.40883e-05	0.000807715
CYP2T3P	-0.276104	-0.618552	1.41547e-05	0.000808859
DALRD3	0.0588636	3.89096	1.41641e-05	0.000808859
RPS7P10	-0.272406	-1.36094	1.41734e-05	0.000808859
IL1R2	0.112094	6.56853	1.42395e-05	0.000811391
ASPM	-0.149257	2.70001	1.42943e-05	0.000813271
MAP10	-0.112024	1.99648	1.43163e-05	0.000813278
RNU6-125P	0.104119	0.904404	1.4367e-05	0.000813702
SLC35E1P1	0.127043	-0.320353	1.43674e-05	0.000813702
RGPD2	-0.282654	2.97151	1.44968e-05	0.0008172
C2	0.0776377	1.82219	1.45052e-05	0.0008172
MTND1P11	0.204821	-0.658089	1.45083e-05	0.0008172
ATP5MF	-0.0798505	3.58622	1.45169e-05	0.0008172
H1-6	0.108667	0.865945	1.4554e-05	0.000818054
SLC39A12	-0.501221	-1.52188	1.45946e-05	0.000818478
MIR1200	0.124506	0.571181	1.4607e-05	0.000818478
HNRNPA0	-0.0699754	5.59236	1.46274e-05	0.000818478
TBC1D3E	-0.421403	-2.1544	1.46949e-05	0.000820159
TRAJ42	0.0969022	1.79751	1.47015e-05	0.000820159
RPL29P14	0.0750277	2.55978	1.47267e-05	0.000820339
CPT1A	0.115626	5.58335	1.48005e-05	0.00082322
RN7SL630P	0.153483	-0.846718	1.48712e-05	0.000824796
UROD	-0.0726159	4.64961	1.48777e-05	0.000824796
CNNM3	0.0858909	4.57081	1.48953e-05	0.000824796
RPS3AP26	-0.309005	1.23419	1.49665e-05	0.000827509
DUSP18	0.0840886	3.74461	1.51278e-05	0.000835189
FIS1	-0.120651	6.36513	1.52755e-05	0.000842097
MSL1	0.0701169	8.28867	1.53237e-05	0.000843506
ANKRD9	-0.161646	4.09746	1.55247e-05	0.00085331
SLC30A8	-0.426808	-0.901897	1.56018e-05	0.000856282
RPL10P19	0.118723	2.10193	1.56364e-05	0.00085692
DOHH	-0.0787627	2.74394	1.56763e-05	0.000857845
MTCYBP3	0.170081	-0.163923	1.58291e-05	0.000864938
MIR28	0.118623	-0.683194	1.59442e-05	0.00086995
HIGD2A	0.0931891	4.43345	1.60393e-05	0.000873013
DIDO1	0.0543853	7.30556	1.60472e-05	0.000873013
NREP	-0.0639012	3.05939	1.62091e-05	0.000878892
RPL11	-0.173117	7.44387	1.62304e-05	0.000878892
HLA-DQA2	-0.390572	2.56344	1.62385e-05	0.000878892
RGS14	0.0942369	5.69317	1.62496e-05	0.000878892
RPS10P9	-0.345603	-2.7607	1.62869e-05	0.000879636
ZSWIM3	0.0642016	1.80209	1.63725e-05	0.000882979
PRDM2	0.0609963	7.00603	1.63967e-05	0.000883007
NME1	-0.109214	1.87854	1.64538e-05	0.000884803
RNASET2	0.0942342	8.38185	1.64804e-05	0.000884957
MIR5587	0.148798	-0.321397	1.65223e-05	0.00088593
ADCY9	0.103061	3.84595	1.66142e-05	0.000887381
TRAF3IP2	0.0812879	2.39972	1.66281e-05	0.000887381
LYN	0.0801186	8.62932	1.66298e-05	0.000887381
TRABD-AS1	0.0868735	2.79632	1.66447e-05	0.000887381
RUNX3	0.101929	5.31744	1.6851e-05	0.000897101
WBP1L	0.0547847	6.17989	1.68778e-05	0.000897245
CRACR2A	0.0662699	5.58827	1.70545e-05	0.000905348
ST6GALNAC6	0.089881	3.3679	1.71763e-05	0.000909237
PDZD4	0.121153	4.13137	1.71766e-05	0.000909237
EPG5	0.0683015	7.26236	1.73051e-05	0.000914742
SNX27	0.0895045	7.13124	1.73829e-05	0.000916961
BCL3	0.145358	3.91052	1.74033e-05	0.000916961
YPEL1	0.0897098	3.92678	1.74209e-05	0.000916961
RPS2P55	-0.121443	0.474461	1.7461e-05	0.000917776
VTI1B	-0.0825205	6.55579	1.7604e-05	0.000923988
DLST	0.0498422	5.89062	1.77023e-05	0.000927838
VMAC	0.0768979	3.55487	1.77808e-05	0.000930648
LEMD2	0.046479	6.47702	1.78819e-05	0.000933275
COA1	0.0740127	6.5301	1.78973e-05	0.000933275
RUBCN	0.108947	5.35308	1.79062e-05	0.000933275
TMEM30BP1	0.121656	1.75558	1.79479e-05	0.000933612
IGLV1-44	0.241109	0.476453	1.79628e-05	0.000933612
SLC25A37	-0.123211	11.4296	1.80123e-05	0.000934171
FBXO44	0.079351	3.0521	1.80499e-05	0.000934171
TRBV10-1	-0.342286	-2.4454	1.80593e-05	0.000934171
MIR29A	0.139345	-1.05421	1.80738e-05	0.000934171
KIF20B	-0.14562	3.90635	1.81383e-05	0.000935956
SESN3	-0.109209	8.67887	1.81585e-05	0.000935956
RPL7P47	-0.324289	-2.12364	1.82295e-05	0.000936471
SGPL1	0.0582694	5.79634	1.82343e-05	0.000936471
TRAPPC10	0.0665346	6.85081	1.82439e-05	0.000936471
KCNJ15	0.12344	8.11897	1.84606e-05	0.00094629
TRIM25	0.0988137	8.0671	1.86412e-05	0.000954236
LDB1	0.0706189	5.49917	1.8721e-05	0.000957007
MT-RNR2	0.350208	6.25009	1.87861e-05	0.000959016
STAT3	0.0884649	7.99187	1.89139e-05	0.000964222
CEBPG	-0.0853793	5.10468	1.93061e-05	0.000982871
PARP16	0.0793384	2.96321	1.95478e-05	0.00099382
ARHGAP26	0.0930152	9.08716	1.97431e-05	0.00100238
APOBEC3B	0.358152	1.0921	1.98588e-05	0.00100688
MAP3K3	0.0923759	6.86788	1.99113e-05	0.00100803
IL12RB1	0.0823009	4.41952	1.99428e-05	0.00100803
LPP	0.063637	7.79041	2.0005e-05	0.00100803
HYCC1	-0.0851841	6.08956	2.00076e-05	0.00100803
CDK5R1	0.101636	4.30818	2.00167e-05	0.00100803
EP300	0.0747039	7.68086	2.0134e-05	0.00101257
TPD52L2	0.0676483	6.79583	2.03301e-05	0.00102105
INO80C	0.0552781	2.88652	2.03797e-05	0.00102216
NCAPH2	0.054224	4.41711	2.05549e-05	0.00102957
REPS2	0.0977734	6.85126	2.06084e-05	0.00103086
CNN2P9	0.144379	0.202058	2.07011e-05	0.00103411
IGHVIII-38-1	-0.288486	-1.67921	2.07819e-05	0.00103676
CDKN2C	-0.0933644	2.24649	2.09859e-05	0.00104554
NFKBID	0.0870896	3.62806	2.12539e-05	0.00105747
GLRX5P1	-0.30943	-2.39825	2.16008e-05	0.00107214
PPM1A	-0.104709	8.33533	2.16247e-05	0.00107214
PSMA6P1	-0.212082	-1.57824	2.16349e-05	0.00107214
PRDM10	0.0470873	4.72309	2.1667e-05	0.00107218
UBE2H	-0.104099	7.87277	2.16955e-05	0.00107218
COQ10A	0.0507134	2.72834	2.17221e-05	0.00107218
UBE4A	0.0573865	7.13045	2.17789e-05	0.00107356
MT-ND2	0.208924	3.70704	2.18087e-05	0.00107361
CHP1P2	0.11186	5.41519	2.1972e-05	0.00108022
ENTPD1	0.0774641	7.71516	2.21719e-05	0.00108861
WASH9P	0.113214	2.11555	2.2245e-05	0.00109077
STIM1	0.0839163	6.11529	2.24992e-05	0.00109853
IGHV3-21	0.181252	1.22123	2.25e-05	0.00109853
DHTKD1	0.0542841	5.76232	2.25143e-05	0.00109853
TIGD5	0.0666316	3.20677	2.25381e-05	0.00109853
SORL1-AS1	0.0935573	3.78218	2.25508e-05	0.00109853
TARS1	-0.0668223	5.23521	2.30005e-05	0.00111898
ZNF324	0.0542925	4.37865	2.353e-05	0.00114324
MIR3605	0.121007	0.188716	2.3623e-05	0.00114578
SLC18B1	-0.0704615	4.63653	2.36459e-05	0.00114578
TGIF2P1	0.0786125	1.2175	2.36744e-05	0.00114578
CDS2	0.0694689	7.60032	2.3823e-05	0.00115041
HDGF	-0.127962	7.67816	2.38318e-05	0.00115041
MGAM	0.115495	8.54855	2.40037e-05	0.00115721
RPL26	-0.25692	4.84049	2.4069e-05	0.00115886
KCTD2	0.0585206	4.51402	2.41407e-05	0.00116081
ROGDI	-0.105364	3.96029	2.45568e-05	0.0011778
RELL1	0.0835653	5.85766	2.45632e-05	0.0011778
VPS37B	0.0903242	5.29648	2.45888e-05	0.0011778
CNN2	0.11385	7.36672	2.46585e-05	0.00117962
SULF2	0.0906573	7.12335	2.47001e-05	0.00118009
CDC42-IT1	0.0912155	3.50375	2.47801e-05	0.00118122
CSGALNACT1	0.0957448	5.63513	2.4787e-05	0.00118122
ACP1	-0.0785223	6.02963	2.51818e-05	0.0011985
COA7	-0.0647112	2.71448	2.52352e-05	0.00119951
SCPEP1	-0.0770972	6.33942	2.52827e-05	0.00120024
RALGAPA2	0.0784453	7.70601	2.56361e-05	0.00121546
RBM14-RBM4	0.0676299	3.35031	2.58002e-05	0.00122169
TNRC6B	0.0724451	8.65224	2.59008e-05	0.001224
SH3BP5-AS1	0.0823744	4.93726	2.59147e-05	0.001224
RPL13AP22	-0.17576	1.63676	2.63948e-05	0.0012451
TRIM24	0.0499568	5.52932	2.66772e-05	0.00125683
RAB11FIP1	0.0779686	8.54172	2.67595e-05	0.00125819
NUP62CL	-0.129961	0.517053	2.67736e-05	0.00125819
PIGT	0.0564165	5.13926	2.68611e-05	0.00125907
CYSLTR2	-0.107956	4.64028	2.68842e-05	0.00125907
RPL31	-0.242491	6.6578	2.68937e-05	0.00125907
CREG1	-0.114484	6.53726	2.70543e-05	0.001265
PSMD4	-0.0746126	6.71397	2.722e-05	0.00127115
STX5-DT	0.123137	-0.0901067	2.74123e-05	0.00127853
CXCL16	0.109261	4.32464	2.77008e-05	0.00129037
LSMEM1	0.0937287	3.63246	2.78953e-05	0.00129781
MT-ATP8	0.219721	0.209096	2.79551e-05	0.00129804
MBD1	0.044541	5.78583	2.79698e-05	0.00129804
SYT15-AS1	-0.131748	0.426744	2.81514e-05	0.00130484
MAPKAPK2	0.0881746	5.64026	2.83437e-05	0.00131212
ADAMTSL4-AS1	0.0972818	6.4978	2.84945e-05	0.00131747
PLAUR	0.0836751	5.71366	2.86355e-05	0.00132136
TIPIN	-0.0775338	1.63346	2.86497e-05	0.00132136
SWT1	-0.139078	4.88644	2.8779e-05	0.00132451
FBXO32	0.0699917	3.96324	2.8789e-05	0.00132451
ENTPD4	0.051987	7.24062	2.8831e-05	0.0013248
NDRG1	0.0610442	6.1313	2.91152e-05	0.00133622
ATG13	0.0616203	5.48691	2.93703e-05	0.00134627
B3GALT4	0.0616673	4.8921	2.95949e-05	0.0013549
PPP1CB	-0.121002	8.20659	2.9716e-05	0.00135731
C3orf62	0.074074	5.42736	2.97205e-05	0.00135731
RBCK1	0.0902012	5.53833	2.98126e-05	0.00135985
C19orf25	0.0636083	4.92488	2.98992e-05	0.00136213
BLOC1S1	-0.0889102	2.74991	2.99506e-05	0.00136281
RAB33B-AS1	0.0582232	4.91337	3.01107e-05	0.00136842
CREB5	0.104946	7.911	3.01902e-05	0.00137037
LIM2-AS1	0.180674	0.135734	3.03881e-05	0.00137767
CHTF8	0.060327	5.31835	3.05674e-05	0.00138411
CFAP95	-0.419933	-1.65897	3.06607e-05	0.00138614
FAM83A	-0.364512	-0.237188	3.06867e-05	0.00138614
CCDC71	0.0581273	4.02975	3.07428e-05	0.001387
FAM120A	0.0574004	7.06816	3.09293e-05	0.00139258
GLULP4	-0.17292	1.70064	3.09413e-05	0.00139258
ZBTB17	0.0478995	4.43731	3.11512e-05	0.00140034
BUB1B	-0.130304	1.03129	3.13448e-05	0.00140615
DGUOK	0.0556436	4.16575	3.13559e-05	0.00140615
RUNX2	0.073067	5.6463	3.1661e-05	0.00141744
CHST15	0.0901645	8.51578	3.16837e-05	0.00141744
RPL31P46	0.0725667	2.55493	3.1782e-05	0.0014195
NSMCE1	-0.0562531	4.20534	3.18106e-05	0.0014195
ASXL1	0.0617767	6.43338	3.18548e-05	0.0014195
BTNL8	0.102797	4.71157	3.18821e-05	0.0014195
JUN-DT	0.0730876	1.53019	3.19329e-05	0.00142006
RNF169	0.0583571	7.64149	3.20468e-05	0.00142343
KAT6B	0.0485396	6.38561	3.20886e-05	0.00142359
UQCR11	-0.112297	4.92459	3.23315e-05	0.0014319
PRSS30P	0.161942	0.600817	3.23528e-05	0.0014319
RPS18P5	-0.207205	1.50145	3.24526e-05	0.00143461
RPSAP12	-0.160016	-0.405195	3.2535e-05	0.00143655
WRAP73	0.0615097	4.40431	3.26395e-05	0.00143778
RIPOR3	-0.155082	1.97413	3.264e-05	0.00143778
HRH2	0.105591	6.48849	3.27003e-05	0.00143874
DNAJB2	-0.11538	6.61484	3.29417e-05	0.00144765
DTNBP1	0.0580452	4.03606	3.30707e-05	0.00145098
KATNIP	0.0772472	4.95827	3.30955e-05	0.00145098
FOXO4	-0.137473	7.04558	3.31344e-05	0.00145098
BABAM1	-0.0964099	4.70395	3.32476e-05	0.00145423
SMC2	-0.0922046	4.04073	3.3288e-05	0.00145429
EPB41	-0.13506	10.74	3.33276e-05	0.00145431
SKA2	-0.0898437	3.1682	3.35397e-05	0.00145933
MIR548T	0.138099	-1.11075	3.35531e-05	0.00145933
NSFL1C	0.0770767	6.73672	3.35811e-05	0.00145933
EID1	-0.112953	6.05634	3.35991e-05	0.00145933
PTPRE	0.0673351	8.3713	3.37255e-05	0.00146067
CCDC144CP	-0.105958	2.49387	3.37457e-05	0.00146067
RPS4Y2	-0.224296	-1.90842	3.37475e-05	0.00146067
PLK4	-0.105855	1.57717	3.38759e-05	0.00146291
IMPDH1	0.099376	5.96655	3.38778e-05	0.00146291
NCF1C	0.0998791	6.08902	3.39409e-05	0.00146394
GDAP1	-0.0664605	3.26848	3.40245e-05	0.00146585
EIF2S2P4	-0.139444	-0.365635	3.40684e-05	0.00146604
DDX56	0.0515602	5.02835	3.41265e-05	0.00146685
SCOC	-0.148256	3.50106	3.42021e-05	0.0014684
ARMC10P1	-0.139003	-1.23104	3.44497e-05	0.00147536
KLRC4	0.157244	2.98175	3.44997e-05	0.00147536
IL15RA	0.0671038	3.23285	3.45021e-05	0.00147536
H3P4	-0.227633	-1.1835	3.45224e-05	0.00147536
LINC02649	0.151367	3.73491	3.4691e-05	0.00148086
SERTAD2	0.0615115	5.13013	3.47752e-05	0.00148276
SNORD3C	-0.476659	-0.259987	3.48765e-05	0.00148538
ZNF335	0.0867339	4.89135	3.49776e-05	0.00148799
RAPGEF1	0.118723	6.4107	3.50624e-05	0.00148852
GCNT1	-0.069268	4.8572	3.5092e-05	0.00148852
HLA-DPB2	-0.155363	-0.151758	3.51129e-05	0.00148852
GABARAPL2	-0.105567	6.34338	3.52033e-05	0.00148852
CSDE1	-0.0732676	9.04184	3.52125e-05	0.00148852
H2AJ	-0.108948	4.99967	3.52298e-05	0.00148852
NFE2L3	-0.0983352	3.26936	3.53677e-05	0.00149265
KRT18P4	0.0822333	1.93402	3.55233e-05	0.00149753
AP1S2	-0.139484	6.7423	3.56575e-05	0.00150047
RBM47	0.082265	7.46433	3.56737e-05	0.00150047
CD55	0.0928228	7.87931	3.60701e-05	0.00151543
SPATA6L	0.123594	1.79148	3.61589e-05	0.0015171
LRRC4	0.0953739	5.54493	3.61912e-05	0.0015171
TMEM120A	0.0637254	3.97891	3.63737e-05	0.00152304
LPCAT1	0.0852647	6.33709	3.66696e-05	0.0015337
AVIL	0.108911	4.71092	3.70752e-05	0.00154893
XBP1P1	0.12223	0.457926	3.72209e-05	0.00155252
REV3L-IT1	0.0836933	0.524678	3.72444e-05	0.00155252
PHF13	0.0579384	3.11332	3.75191e-05	0.00156092
MTATP6P11	0.139749	0.829274	3.75474e-05	0.00156092
TSPAN5	-0.140628	7.14592	3.75716e-05	0.00156092
PTAFR	0.0835762	8.11171	3.76468e-05	0.0015623
MAP1LC3A	0.112181	1.60659	3.78987e-05	0.001571
TCEA1	-0.0801861	6.27223	3.82182e-05	0.00158249
ADAMTS10	0.118727	3.42215	3.83128e-05	0.00158307
XRCC2	-0.125158	1.19151	3.83526e-05	0.00158307
GUSBP16	0.160195	-0.719788	3.83598e-05	0.00158307
MCM5	0.05674	5.3212	3.85881e-05	0.00158918
XPO1	-0.0718056	7.52841	3.85931e-05	0.00158918
CFAP92	0.109924	3.83916	3.87787e-05	0.00159506
MRPL54	-0.0887195	3.81883	3.89673e-05	0.00160105
CKLF-CMTM1	0.142387	0.825582	3.90525e-05	0.00160134
C6orf52	-0.115855	0.0335089	3.90601e-05	0.00160134
TBXAS1	0.0740005	8.07857	3.93687e-05	0.00161186
MZT1	-0.125803	2.96068	3.94032e-05	0.00161186
PTRHD1	-0.100785	3.02794	3.97843e-05	0.00162566
LIPA	-0.087438	5.79681	4.01639e-05	0.00163937
ROMO1	-0.119045	3.57694	4.05232e-05	0.00165102
ATP5MG	-0.115487	4.77907	4.056e-05	0.00165102
LINC02458	0.186229	1.2156	4.05823e-05	0.00165102
FBXL13	0.123226	4.87767	4.06471e-05	0.00165103
NCOA6	0.0741001	5.51627	4.07077e-05	0.00165103
RNF24	0.13071	7.3318	4.07263e-05	0.00165103
TBC1D8B	-0.108337	1.68069	4.07595e-05	0.00165103
TAF13	-0.109801	3.29978	4.10183e-05	0.00165843
RPA1	-0.0641062	5.2512	4.10314e-05	0.00165843
FAHD1	-0.0908661	4.1075	4.11306e-05	0.00166064
GZMAP1	-0.137986	-0.822331	4.16711e-05	0.00168018
LPAR1	-0.118845	3.45483	4.17046e-05	0.00168018
TBC1D30	0.0826366	3.05426	4.18284e-05	0.00168335
NDST1	0.124724	5.89505	4.19642e-05	0.00168629
PF4V1	0.233751	2.00985	4.20111e-05	0.00168629
FKBP5	0.121766	7.11584	4.20374e-05	0.00168629
IGLJ3	-0.216743	-1.63171	4.23189e-05	0.00169576
ABL1	0.0791149	3.68231	4.25067e-05	0.00170146
CENPBD2P	0.073288	3.65347	4.25854e-05	0.00170278
GBP1P1	0.266413	1.1327	4.26482e-05	0.00170346
FAM3B	-0.385648	0.270431	4.27579e-05	0.00170601
RPS18P12	-0.204286	-0.821525	4.28563e-05	0.00170811
RPS7P11	-0.277846	-1.24581	4.31299e-05	0.00171578
SCAND2P	0.0595162	5.59687	4.31408e-05	0.00171578
MIR873	0.209936	-1.39555	4.33431e-05	0.00172119
TESK1	0.0882736	2.40009	4.33693e-05	0.00172119
ZBTB39	0.0524765	3.82962	4.34806e-05	0.00172377
SORL1	0.0882189	11.4418	4.37771e-05	0.00173368
MIR548O	-0.152255	-1.43665	4.42362e-05	0.00175001
VPS9D1	0.104634	4.04705	4.46625e-05	0.00176452
ZBTB16	0.134024	3.95404	4.47344e-05	0.00176452
LIMD2	0.0660946	7.88192	4.4745e-05	0.00176452
RPSAP54	-0.200754	-0.596274	4.50317e-05	0.00177394
ATP11A	0.0902285	7.22217	4.51266e-05	0.0017758
GUSBP17	0.141574	-0.211226	4.53268e-05	0.0017818
EFNA4	0.0587417	2.05973	4.54679e-05	0.00178515
SEMA4F	0.0589358	3.56895	4.55471e-05	0.00178515
RN7SL144P	0.142381	-0.747056	4.55557e-05	0.00178515
TRBV11-1	-0.219497	-1.76353	4.57585e-05	0.00179121
MT-ND4L	0.223567	2.92385	4.58108e-05	0.00179138
CERS5	0.0477117	5.07812	4.60376e-05	0.00179836
AKAP7	-0.10063	3.94512	4.62409e-05	0.00180441
LINC02976	0.113908	3.00643	4.67639e-05	0.00182291
MIR3139	0.128215	0.636715	4.6901e-05	0.00182635
HACD1	-0.125708	1.10786	4.73601e-05	0.0018423
C18orf32	0.0446839	3.60487	4.75002e-05	0.00184582
BMAL1	0.0600857	6.56994	4.76083e-05	0.00184809
SLC4A5	0.082659	1.76011	4.77285e-05	0.00185021
DENND5A	0.0759407	7.88156	4.77621e-05	0.00185021
BICRAL	0.0690582	6.05132	4.79466e-05	0.00185543
RPS10P3	-0.196009	0.273652	4.84684e-05	0.00187368
ZNF764	0.0907561	2.23815	4.8548e-05	0.00187481
ZNF564	0.0650016	2.35702	4.86283e-05	0.00187596
RBM38	-0.154505	8.0744	4.88547e-05	0.0018794
FZD5	-0.0961124	2.33309	4.88692e-05	0.0018794
BLTP3B-DT	0.096223	0.215502	4.88791e-05	0.0018794
PHTF1	0.0574677	5.3504	4.8919e-05	0.0018794
PHLPP2	-0.0676813	4.83246	4.91269e-05	0.00188544
SLCO3A1	0.0721247	6.78421	4.91955e-05	0.00188613
ZHX1	-0.0986614	4.82532	4.92548e-05	0.00188646
METRNL	0.0757494	5.71423	4.95747e-05	0.00189677
SH3KBP1	0.0672692	6.85435	4.97849e-05	0.00190097
C17orf67	0.0525331	3.07856	4.97866e-05	0.00190097
GLYATL2	-0.380522	-1.36429	4.99096e-05	0.00190372
PLOD1	0.0894257	4.48302	5.00268e-05	0.00190624
YIPF6	-0.0684946	6.13534	5.02466e-05	0.00191266
PSMC1P1	-0.168523	-1.05414	5.03863e-05	0.00191317
TAPT1-AS1	0.0588147	3.41005	5.03957e-05	0.00191317
RAB7A	0.0863694	5.26508	5.04142e-05	0.00191317
MRPL36	-0.0837193	2.43959	5.07646e-05	0.00192451
RN7SL172P	0.0702424	2.64177	5.09824e-05	0.0019308
CCDC17	0.103596	3.11764	5.11596e-05	0.00193555
ZNF875	0.0599808	5.26456	5.13389e-05	0.00194036
APBB1IP	0.0705884	7.20929	5.14801e-05	0.00194372
BTBD10P2	0.0654432	0.508851	5.15658e-05	0.00194426
GALNT5	-0.159018	1.71926	5.15985e-05	0.00194426
SETD4	0.0431163	4.6504	5.19657e-05	0.00195612
TPT1	-0.163459	8.61786	5.21143e-05	0.00195973
TNFRSF1A	0.0957073	6.63579	5.24756e-05	0.00197133
B3GALT6	0.0535073	4.23754	5.2548e-05	0.00197206
NPTN-IT1	0.0848075	3.5052	5.27161e-05	0.0019756
CHRNA10	0.0856887	2.05735	5.27652e-05	0.0019756
TUBA4A	0.0691379	6.38999	5.28041e-05	0.0019756
HTATSF1	-0.0808731	4.77607	5.28545e-05	0.0019756
HMMR	-0.206549	0.239798	5.32959e-05	0.00198798
ST6GALNAC2	0.101778	4.20872	5.33162e-05	0.00198798
RNU4-62P	0.0735137	2.1642	5.33458e-05	0.00198798
USP34-DT	0.0670951	3.20948	5.35391e-05	0.0019932
VRK3	0.0551493	5.90977	5.37779e-05	0.00200009
PEG13	0.102177	3.96285	5.40824e-05	0.00200774
MIR590	0.0777384	1.58752	5.41066e-05	0.00200774
LINC02598	0.148393	-0.128753	5.41453e-05	0.00200774
SHLD2P1	-0.183465	-0.87957	5.45043e-05	0.00201904
RPL23AP34	0.106173	1.51203	5.46714e-05	0.00202322
RPL4P4	-0.15059	2.46126	5.53351e-05	0.00204458
RBAK	-0.125565	4.80808	5.53772e-05	0.00204458
SLC30A1	-0.130531	5.36683	5.54131e-05	0.00204458
CD300H	0.207864	3.13349	5.56675e-05	0.00205193
SCN3A	-0.165856	2.68262	5.58585e-05	0.00205632
USP11	0.0773002	3.51104	5.58968e-05	0.00205632
DLGAP5	-0.190097	1.02829	5.6018e-05	0.00205874
RPL21P28	-0.219165	0.910026	5.62704e-05	0.00206598
STEAP4	0.100788	8.7658	5.67189e-05	0.0020804
ETFBKMT	-0.0631551	1.83141	5.67842e-05	0.00208075
FAM53C	0.0882588	6.27006	5.68921e-05	0.00208265
CANT1	0.0841696	5.63745	5.70002e-05	0.00208409
ZBTB49	0.0450875	4.05041	5.70881e-05	0.00208409
RALY	0.0609286	6.30939	5.7099e-05	0.00208409
MT-ND5	0.219104	3.94431	5.74248e-05	0.00209393
MAML2	0.061823	5.76698	5.77842e-05	0.00210497
ZNF652-AS1	0.0674304	1.03834	5.80889e-05	0.00211401
WBP1LP1	0.108731	-0.0158546	5.86508e-05	0.00213237
UBE2V1	0.065021	4.71317	5.88507e-05	0.00213755
KRT18P31	0.0678669	5.30598	5.9181e-05	0.00214359
RN7SL288P	0.10796	3.49514	5.91952e-05	0.00214359
ADGRE2	0.110795	6.89423	5.92204e-05	0.00214359
IGLV1-36	0.303263	-1.52784	5.93229e-05	0.00214359
ZNF862	0.0610148	5.29587	5.93277e-05	0.00214359
TRPC4AP	0.0514923	6.70414	5.93619e-05	0.00214359
RBM15B	0.0431641	5.69245	5.98e-05	0.00215317
BMS1P20	-0.0925616	4.45298	5.98502e-05	0.00215317
NCAPGP1	-0.107623	1.03679	5.98764e-05	0.00215317
AREL1	0.063372	7.34519	5.98779e-05	0.00215317
BLOC1S6	-0.0848925	6.38504	5.99163e-05	0.00215317
EMP1	-0.16354	1.52671	6.00175e-05	0.00215473
GBP6	0.182657	1.13813	6.00884e-05	0.0021552
ATP5MK	-0.104817	4.24475	6.01506e-05	0.00215536
CR1	0.09227	7.868	6.02742e-05	0.00215771
SNRPEP9	0.0994183	0.742813	6.04041e-05	0.00216029
H2BP1	-0.21733	-1.46752	6.04895e-05	0.00216103
TPMT	-0.0881051	3.7166	6.06255e-05	0.00216103
RAB13	-0.174079	-0.577925	6.06326e-05	0.00216103
SRP14P3	0.0669982	1.22561	6.06569e-05	0.00216103
GTF2IP4	0.087093	4.71697	6.09603e-05	0.00216884
ARID3B	0.102745	4.43648	6.09925e-05	0.00216884
RBM14	0.0757183	5.99137	6.15753e-05	0.00218748
ASPRV1	0.13149	3.44555	6.17515e-05	0.00218975
TAF11L2	0.144914	0.315735	6.17967e-05	0.00218975
ECE1	0.101653	6.69745	6.18263e-05	0.00218975
UBXN8	-0.0876448	1.74912	6.19112e-05	0.00218975
ICAM3	0.0700655	8.22895	6.1933e-05	0.00218975
FBXO42	0.0495702	5.73309	6.23087e-05	0.00220094
RARS1	-0.0771612	5.4674	6.23969e-05	0.00220197
STOM	-0.09977	7.36393	6.33064e-05	0.00223118
CHML	-0.129322	5.08401	6.33442e-05	0.00223118
SLC25A44	0.0757396	5.89016	6.36766e-05	0.00224059
RUNDC1	0.0613159	4.30534	6.37316e-05	0.00224059
LINC02033	0.0835623	2.5488	6.39762e-05	0.00224706
SLX1A	0.364833	-2.74303	6.43796e-05	0.00225911
TRDJ1	0.141424	1.16303	6.45352e-05	0.00226244
CHAC2	-0.116016	0.907956	6.47828e-05	0.00226696
XKR8	0.0862268	4.4752	6.47858e-05	0.00226696
MIR4744	0.125676	-1.02168	6.48904e-05	0.00226849
MED14	0.05613	5.79846	6.50962e-05	0.00227355
SGO2	-0.13674	1.89497	6.57032e-05	0.0022926
KIAA0319L	0.0730212	6.53317	6.57704e-05	0.0022928
MIR30E	0.0812851	0.319015	6.61831e-05	0.00230503
ANXA2P2	-0.137743	0.523261	6.65274e-05	0.00231485
HK1	-0.0988296	6.29139	6.6636e-05	0.00231587
RBX1	-0.10014	5.39632	6.6798e-05	0.00231587
GTF3C1	0.066308	5.60845	6.68333e-05	0.00231587
CTSW	0.135084	3.73938	6.68602e-05	0.00231587
SNORA40B	-0.207455	0.52585	6.68673e-05	0.00231587
ANKRD13A	0.0564404	8.25016	6.71441e-05	0.0023233
WDR55	0.0463142	5.4094	6.73228e-05	0.00232732
RPL24P8	-0.197686	-1.2577	6.79415e-05	0.00234523
PTMAP2	-0.142663	-0.396111	6.79667e-05	0.00234523
PLXNC1	0.0728627	9.31709	6.80486e-05	0.00234588
SDHAF2	0.0536456	4.42455	6.84001e-05	0.00235475
CPQ	0.0725312	7.16161	6.84321e-05	0.00235475
SFRP1	-0.385539	-0.461745	6.86415e-05	0.00235951
BCKDK	0.0682049	4.24695	6.87515e-05	0.00235951
RAB6A	-0.0676557	6.73349	6.87604e-05	0.00235951
LRRCC1	-0.112029	2.1331	6.89909e-05	0.00236213
SNORD15B	-0.319748	3.69903	6.90367e-05	0.00236213
TLE4	0.0528024	7.41336	6.90798e-05	0.00236213
DCLRE1A	-0.0911217	3.25733	6.90904e-05	0.00236213
RNA5-8SN3	-0.731119	-3.00712	6.93105e-05	0.00236568
SON	0.0483462	9.00093	6.93212e-05	0.00236568
RASSF3	0.0660124	7.76064	6.95928e-05	0.00237247
RPS6KA1	0.0649917	7.48967	6.96475e-05	0.00237247
HSH2D	0.104626	5.80599	6.98308e-05	0.00237654
CIMAP1B	0.122813	4.29183	7.01495e-05	0.00238521
SF1	0.0753282	7.17319	7.04804e-05	0.00239428
SNX4	-0.113933	4.0561	7.10233e-05	0.00241052
EEF1A1P6	-0.165932	4.85544	7.11396e-05	0.00241227
GNLY	0.153884	6.39469	7.14171e-05	0.00241948
RNU6-828P	0.148833	-0.919372	7.15237e-05	0.00242089
FAM168A	0.0627605	5.4578	7.16983e-05	0.0024246
GRAMD2B	0.0601893	2.46674	7.18047e-05	0.002426
RPS3AP20	-0.280338	-1.49821	7.2219e-05	0.00243778
USP12PX	-0.323982	-2.59254	7.27816e-05	0.00245455
TBC1D12	-0.0825688	3.39827	7.29976e-05	0.00245961
RMB8AP1	-0.133553	-0.780059	7.31232e-05	0.00246162
MINDY1	0.094549	6.01992	7.33555e-05	0.0024651
TMA7	-0.183968	4.68978	7.33728e-05	0.0024651
ZHX2	0.0775691	4.39363	7.34251e-05	0.0024651
CDC27P3	-0.151634	-0.381637	7.4755e-05	0.00250749
TRAJ1	0.106544	1.52715	7.48776e-05	0.00250934
PRKXP1	0.116412	2.32831	7.50894e-05	0.00251418
EDEM1	0.0573722	7.16095	7.52316e-05	0.00251507
KIF23	-0.121401	1.72061	7.52628e-05	0.00251507
MIR3939	0.139041	2.83771	7.53185e-05	0.00251507
CCDC69	0.0793897	6.31579	7.55904e-05	0.00252064
ZNF124	-0.0762844	3.81929	7.56341e-05	0.00252064
NF2	0.0610671	4.91637	7.56881e-05	0.00252064
THOC5	0.0726095	5.97694	7.62216e-05	0.00253614
CHPF2	0.0849393	5.47232	7.64221e-05	0.00253924
SLC45A4	0.0969956	7.07183	7.6451e-05	0.00253924
CASTOR3P	0.0783401	4.06529	7.6569e-05	0.00254089
SF3A1	0.0775605	5.55856	7.67425e-05	0.00254438
SOCS1	0.129229	1.19128	7.71748e-05	0.00255644
FRG1JP	-0.229545	0.630474	7.73667e-05	0.00256052
TUBB4BP2	0.0968707	0.586173	7.76956e-05	0.00256891
COLQ	0.106373	3.12104	7.77922e-05	0.00256891
RPSAP36	0.0900209	2.52985	7.78271e-05	0.00256891
ZNF845	-0.137507	4.31848	7.79844e-05	0.00256936
DEPDC1P2	-0.173297	0.967781	7.80372e-05	0.00256936
CA1	-0.213512	6.38851	7.80474e-05	0.00256936
FBXO45	-0.0771655	3.72174	7.82268e-05	0.00256944
STIM2-AS1	-0.177135	-1.12534	7.83102e-05	0.00256944
MTMR12	0.0479419	5.38461	7.83185e-05	0.00256944
DIP2B	0.0599125	7.99036	7.83257e-05	0.00256944
MIR374A	0.0846743	-0.0868607	7.84786e-05	0.00257219
SIGLEC9	0.0840719	5.79396	7.85674e-05	0.00257284
DPF2	0.0671386	5.09671	7.89335e-05	0.00258256
MRPS6	0.0654838	3.67116	7.92387e-05	0.00259027
ACSL6	-0.0744817	4.0702	7.95708e-05	0.00259885
TGFBRAP1	0.0527877	4.56342	7.9794e-05	0.00260386
UBA52P8	0.156804	-1.72432	8.01621e-05	0.00261144
CENPI	-0.0988159	1.73488	8.01667e-05	0.00261144
MTHFSD	0.0377146	4.42226	8.03728e-05	0.00261587
USP4	0.0622503	7.32511	8.05633e-05	0.00261978
CERK	0.0501918	7.21709	8.07218e-05	0.00262265
GARRE1	0.0602459	5.26074	8.11989e-05	0.00263378
CENPU	-0.0925934	1.48881	8.1241e-05	0.00263378
KLC4	0.0661513	3.37148	8.13443e-05	0.00263378
LINC02917	0.0957642	0.951671	8.13472e-05	0.00263378
RPL39	-0.230798	6.0682	8.14909e-05	0.00263615
CARD8	0.0593248	7.90994	8.17078e-05	0.00264087
MAN2B2	0.0823706	5.41822	8.17885e-05	0.00264107
PTGS2	0.103735	5.57927	8.19145e-05	0.00264107
SNORD67	-0.245811	-1.24881	8.19266e-05	0.00264107
TFIP11-DT	-0.118437	0.553422	8.25171e-05	0.00265781
BEST1	0.0955979	5.77521	8.33676e-05	0.00268288
H3-3A-DT	0.0714684	3.1571	8.35709e-05	0.0026871
ADAM8	0.0899112	7.90099	8.40575e-05	0.00270042
RNU6-5P	0.0778386	3.53953	8.41631e-05	0.00270148
RTEL1P1	0.123478	4.49012	8.49934e-05	0.00272481
POFUT2	0.0849115	3.92234	8.50361e-05	0.00272481
KAT7	0.0554555	6.76264	8.53184e-05	0.00273151
WDR89	-0.131626	4.00055	8.57305e-05	0.00274235
HES1	-0.128946	0.744605	8.58447e-05	0.00274364
HEPACAM2	-0.160502	1.19084	8.63821e-05	0.00275634
CEACAM4	0.10161	5.29388	8.63897e-05	0.00275634
TRBV9	0.135609	1.12281	8.67491e-05	0.00276543
SPRED1	-0.108507	3.56537	8.70885e-05	0.00277364
IGHA1	0.253117	3.03622	8.71555e-05	0.00277364
TACC3	0.0950727	5.91409	8.73666e-05	0.00277799
TMEM252-DT	0.131884	0.636098	8.75872e-05	0.00278263
KLC1	0.0714733	6.85846	8.8162e-05	0.00279851
PIK3IP1-DT	0.0943569	0.623844	8.84955e-05	0.00279882
PREX1	0.0910632	9.10723	8.85012e-05	0.00279882
PIP4K2A	-0.104425	8.97393	8.85014e-05	0.00279882
DCAF15	0.088623	3.67942	8.85496e-05	0.00279882
OSBP2	-0.17518	5.60709	8.8645e-05	0.00279882
HNRNPA1P10	-0.141294	-0.00997457	8.86896e-05	0.00279882
MIR941-5	0.259976	-1.90352	8.86975e-05	0.00279882
EEF1B2P3	-0.230616	-0.523464	8.91166e-05	0.00280966
XPC	0.0568574	6.70796	8.95852e-05	0.00282205
MRPS23	-0.0647327	3.93289	8.99553e-05	0.00283014
GPRC5D-AS1	0.233523	1.12925	8.99941e-05	0.00283014
MAPK1	0.0562744	8.77455	9.04019e-05	0.00284057
RAPH1	-0.088826	3.00788	9.08325e-05	0.0028517
P4HTM	0.0544297	4.50673	9.10908e-05	0.0028574
PLA2G4A	-0.0895492	3.42449	9.1582e-05	0.00287038
CLPP	0.0576186	3.18846	9.16586e-05	0.00287038
UBE2J2	0.0494525	5.59035	9.1797e-05	0.0028723
APBA3	0.05929	3.86193	9.18772e-05	0.0028724
MAU2	0.0991557	5.89331	9.21781e-05	0.00287807
LINC00243	0.0896334	3.86238	9.22132e-05	0.00287807
H2BC6-AS1	0.0793835	1.62576	9.25058e-05	0.00288479
TWSG1	-0.0777083	3.42557	9.28096e-05	0.00289184
MAOA	-0.228243	1.06618	9.29747e-05	0.00289457
RAB37	0.0617106	6.00754	9.30706e-05	0.00289513
CDC42SE1	0.0520519	9.1537	9.33347e-05	0.00290031
BRD8	0.048436	5.13243	9.34234e-05	0.00290031
AIDAP2	-0.119467	0.718827	9.35011e-05	0.00290031
LINC03015	-0.0919094	0.796277	9.35483e-05	0.00290031
TCEA1P2	-0.0990489	1.32671	9.41387e-05	0.00291619
DCPS	0.056164	3.56601	9.42172e-05	0.0029162
NLRC3	0.0671736	6.76853	9.47549e-05	0.0029304
PRKCH	0.0635095	7.90223	9.48712e-05	0.00293157
DYNLL2	-0.0596172	6.77181	9.50541e-05	0.00293229
TRAPPC12	0.0637695	6.41447	9.50969e-05	0.00293229
B3GNTL1	0.0997005	4.94921	9.51659e-05	0.00293229
COPS2	-0.123003	5.41371	9.52092e-05	0.00293229
AXIN1	0.0706621	5.24854	9.54233e-05	0.00293645
MBNL3	-0.141244	9.40467	9.57633e-05	0.00294449
LINC02899	-0.328112	-0.163338	9.60327e-05	0.00295033
TMEM179B	0.0620297	3.29292	9.62555e-05	0.00295474
SKA3	-0.174759	1.85988	9.63881e-05	0.00295638
IER3IP1	-0.107607	3.25572	9.65068e-05	0.00295759
PAK1IP1	-0.0787716	2.52813	9.66276e-05	0.00295885
KIF4A	-0.172215	0.547858	9.82077e-05	0.00300129
CEP57L1	-0.0834854	3.17357	9.82311e-05	0.00300129
RAB1AP1	0.149823	1.9106	9.82798e-05	0.00300129
RN7SL622P	0.34016	-1.94453	9.84313e-05	0.00300129
CYFIP2	0.064235	8.11424	9.85197e-05	0.00300129
IRF2BPL	0.080442	5.47616	9.85411e-05	0.00300129
TMSB4XP4	-0.180184	3.75315	9.85773e-05	0.00300129
GAB2	0.0976043	6.54253	9.96578e-05	0.00303171
GSPT1	-0.129129	8.56992	9.99908e-05	0.00303936
MLF2	0.0631119	5.52263	0.000100137	0.00304134
SERPING1	0.237348	1.62715	0.000100432	0.00304779
NFYB	-0.108179	3.92076	0.00010082	0.00305709
CFAP58	0.0942406	2.43744	0.000101577	0.00307607
CTAG2	-0.494323	-1.90174	0.000101611	0.00307607
RPL9	-0.205941	7.40132	0.000101906	0.00308169
DENND3	0.100576	8.85213	0.000101962	0.00308169
RPL11P1	0.129746	-0.637612	0.000102474	0.00309464
ITGB1BP2	0.0881189	0.887796	0.000102571	0.00309508
NUB1	0.058727	6.27169	0.000102921	0.00310312
MAEA	0.0653746	6.11446	0.000103064	0.00310401
NTAN1	-0.0776552	3.96233	0.000103117	0.00310401
SPATA2L	0.0796519	2.3415	0.000103609	0.00311629
SET	-0.0801854	7.52295	0.000104102	0.00312859
KDM2A	0.0650607	7.59626	0.000104272	0.00313119
BMS1P1	-0.101117	3.00314	0.000104635	0.00313957
PRKDC	0.0655624	8.01015	0.000104899	0.00314489
C1RL	0.0743233	6.41345	0.000104982	0.00314489
NCOA5	0.0482471	4.61874	0.000105075	0.00314515
MAPKAPK5	0.0417443	5.77034	0.00010531	0.00314967
PDXDC2P-NPIPB14P	0.0975531	2.69153	0.000105452	0.00315099
RPL5P18	-0.135735	-1.2433	0.000105523	0.00315099
CSAD	0.104851	4.88031	0.000105852	0.00315828
SUSD6	0.103885	6.32847	0.000106115	0.00316358
MMUT	-0.077675	4.21489	0.000106902	0.00318219
ERLIN2	-0.0387885	5.00681	0.000106978	0.00318219
LINC02365	-0.125553	0.0137926	0.000106995	0.00318219
HSPA6	0.0888563	7.16053	0.000107838	0.00320246
TMEM200B	-0.226046	0.580275	0.000107849	0.00320246
CDKL1	-0.0697414	4.20105	0.000108097	0.00320249
TM4SF19	0.190976	-0.126768	0.000108122	0.00320249
ZSWIM8	0.0930404	5.98058	0.000108151	0.00320249
RRP7BP	0.0768652	3.89376	0.000108193	0.00320249
CPSF7	0.0840679	5.30818	0.000108501	0.00320837
USP42	0.0652447	3.81344	0.000108564	0.00320837
KCTD12	-0.0867349	6.86773	0.000108841	0.0032116
PPP2R2D	0.0457914	6.15677	0.000108898	0.0032116
URGCP	0.0482525	4.57207	0.000108932	0.0032116
MSRB1	0.0751512	6.92093	0.000109705	0.00323182
PIK3CG	0.0532234	7.21077	0.000110568	0.00325467
PRR13P2	0.198767	-1.95793	0.000110945	0.0032632
LARP4	-0.0679184	5.24046	0.000111063	0.00326409
CLEC4OP	0.261489	-0.249508	0.000111269	0.0032652
BMS1P7	-0.167246	-0.117713	0.000111302	0.0032652
TSNAX-DISC1	0.110209	0.184597	0.000111515	0.0032652
FRY	0.0744705	8.38142	0.000111532	0.0032652
ISG20L2	0.0474743	5.1388	0.000111539	0.0032652
KLF2	0.0650927	6.9519	0.000111951	0.0032732
SP1	0.0592709	7.93478	0.000112129	0.0032732
SIGLEC10-AS2	0.16069	-0.781394	0.000112158	0.0032732
RPS3AP2	-0.119011	-0.748466	0.000112163	0.0032732
FBXO9	-0.0796212	6.69717	0.000112252	0.00327323
YES1P1	-0.0817194	3.27754	0.000112363	0.00327391
LMBR1L	0.0510607	5.70302	0.00011249	0.00327503
SMIM15	-0.0934705	4.60448	0.000112601	0.00327571
CYTOR	0.0872956	5.81199	0.000112836	0.00327997
BANP	0.0614965	6.46979	0.00011305	0.00328365
SIK2	0.0472802	4.59757	0.000113873	0.00330499
HECW2	0.0966092	4.27092	0.000114177	0.00331117
NUDT1	-0.0765787	3.37324	0.000114264	0.00331117
STARD5	0.0771155	1.67656	0.000114389	0.00331221
SBNO2	0.117167	6.57269	0.000114591	0.00331547
ANKRD16	0.0530625	2.29683	0.000114915	0.00332229
NXT2	-0.121935	3.37797	0.000115326	0.00333159
SNRPF	-0.0944746	3.27926	0.000115796	0.00334026
RHBDD2	0.0761122	3.19532	0.000115882	0.00334026
LINC01395	0.161171	0.664267	0.000115895	0.00334026
RNVU1-30	0.0738831	0.853353	0.000116629	0.00335882
PPTC7	0.0562178	6.71531	0.000116953	0.00336369
MTND2P28	0.271621	-1.83654	0.000116979	0.00336369
TYSND1	0.0528666	4.57184	0.000117086	0.00336416
RNU1-3	-0.549505	3.96862	0.000117208	0.00336504
RPSAP3	-0.206632	-1.54785	0.000117372	0.00336504
ODAD4	-0.14971	1.05748	0.000117441	0.00336504
NFE4	0.11562	3.16162	0.000117478	0.00336504
RAD51AP1	-0.119463	0.792601	0.000118111	0.00338058
DCAF5	0.0470954	6.03074	0.000118462	0.00338803
CDYL	-0.0905794	5.65514	0.000118795	0.00339308
PIM2	0.0736547	5.81941	0.000119007	0.00339308
IPPK	0.0364152	4.25429	0.000119144	0.00339308
BCL2L1	-0.149177	8.90893	0.00011917	0.00339308
SNORA53	-0.209925	4.34459	0.000119175	0.00339308
TUBB2A	-0.36408	4.8152	0.000119185	0.00339308
DPRXP3	0.127854	0.254591	0.000119364	0.00339324
PLK3	0.0927442	3.858	0.000119373	0.00339324
HNRNPA1P7	-0.139753	-0.09253	0.000119613	0.00339599
ATP5MJ	-0.107898	3.88614	0.000119652	0.00339599
MMP9	0.159378	4.96219	0.000119883	0.00339997
RFK	-0.080271	3.87391	0.000120433	0.00341287
TMEM91	0.0687182	4.66393	0.000120521	0.00341287
ZNF839	0.0530117	4.13824	0.000121042	0.00342501
PPFIA1	0.0621188	6.05893	0.000121311	0.00343002
PACS1	0.0989035	6.66737	0.000122771	0.00346649
TFAP2E-AS1	0.066544	2.74787	0.000122787	0.00346649
RPL35AP2	0.101307	2.15364	0.000124639	0.00351562
HIPK1-AS1	-0.0860084	1.46776	0.000124802	0.00351562
DLGAP1-AS1	0.0662186	3.03709	0.000124899	0.00351562
DCAF12	-0.148185	10.1233	0.000124904	0.00351562
PSMC3	-0.0687961	5.04946	0.000125319	0.00352463
EIF4EP2	-0.19068	-1.38168	0.000125487	0.00352617
LRRC25	0.0974074	5.72105	0.000125598	0.00352617
RPS3AP47	-0.227211	-0.669079	0.000125658	0.00352617
TRMT10A	-0.106343	2.44779	0.000125934	0.00353058
ST8SIA6	0.0849575	2.48341	0.000126018	0.00353058
EIF4A1P10	-0.118742	0.53338	0.000126099	0.00353058
CCNY-AS1	0.0634167	2.85198	0.000126218	0.00353127
HEXA-AS1	-0.100084	0.962297	0.000126552	0.00353794
DYNLL1	-0.0733765	4.60927	0.00012735	0.00355732
FPR3	0.130021	1.1349	0.000127436	0.00355732
ARHGAP27P1-BPTFP1-KPNA2P3	0.0713894	3.67814	0.000128228	0.00357675
RPS27P9	-0.233494	-2.07618	0.000128786	0.00358962
RPL6P27	-0.159655	1.14316	0.000129467	0.00360592
RPL34P10	0.0745368	0.560893	0.000129899	0.00361525
DDX21	-0.0660326	6.58314	0.000130274	0.00362297
SKAP1	0.0727945	4.90841	0.000131021	0.00363842
POLR1F	-0.0990081	3.60362	0.000131025	0.00363842
SF3B2	0.0669816	5.68218	0.000131353	0.00364399
LITATS1	0.0545464	1.7695	0.00013142	0.00364399
SNRPE	-0.104018	3.55661	0.000131756	0.00365058
RPL6P8	-0.156636	-0.926457	0.000132087	0.00365437
UBXN6	-0.136824	8.33451	0.000132089	0.00365437
ATXN7L3-AS1	0.0854807	0.0419364	0.000132472	0.00366115
MIR4521	-0.2609	-1.18162	0.000132531	0.00366115
VPS39	0.0661528	6.2636	0.000132682	0.00366207
PDCD4-AS1	0.0816768	2.14935	0.00013276	0.00366207
FBXL6	0.0842373	2.51008	0.000133461	0.00367867
CTSF	0.0766677	2.09689	0.000134374	0.0037011
PLAGL1	0.0726441	4.84655	0.000134753	0.0037088
RPGR	0.0695033	5.68212	0.000135287	0.00371711
POPDC2	0.0690446	1.6723	0.000135369	0.00371711
CREBBP	0.0933328	7.31115	0.000135468	0.00371711
RNU6-1143P	0.0877427	-0.499405	0.000135566	0.00371711
ASGR1	-0.0769261	3.04708	0.000135598	0.00371711
ANKRD18DP	-0.17399	0.383677	0.000135654	0.00371711
THOC7	-0.077422	3.45537	0.0001363	0.00373207
ZKSCAN3	0.0402504	3.90684	0.000136566	0.00373561
PSPC1P1	-0.177143	-1.43519	0.000136806	0.00373561
ZBED10P	0.0766	2.76367	0.000136809	0.00373561
COX5BP6	0.0918962	-0.126671	0.00013683	0.00373561
UNC119	0.060824	5.82063	0.000137077	0.00373962
SPOPL-DT	0.0843789	2.0462	0.000137812	0.00375508
MIR499B	0.14863	-1.20761	0.000137845	0.00375508
RPS29P3	-0.300432	-2.67099	0.000137952	0.00375525
LUCAT1	0.0835195	8.80182	0.000138575	0.00376945
NECTIN3	-0.104559	1.9393	0.000138956	0.00377443
IGF1R	0.089994	7.30336	0.000139009	0.00377443
TNS1	-0.173554	7.17566	0.000139062	0.00377443
SYNRG	0.0545373	7.39613	0.000139885	0.00379401
LRCH4	0.0770509	5.25483	0.000140854	0.00381629
HEBP2	0.062417	7.11169	0.000140912	0.00381629
BORCS6	0.0551993	4.16195	0.000141209	0.00382155
CWC25	0.0485572	5.33053	0.000142128	0.00384365
SLA	0.0623308	9.01335	0.000142496	0.00385081
CHFR	0.0562165	6.56843	0.000142795	0.00385608
DGKK	0.196827	1.89574	0.000143106	0.00386168
ACHE	-0.204326	0.404951	0.000143646	0.0038694
CMTM7	0.0624051	5.15278	0.000143697	0.0038694
ZNF442	-0.110233	1.69742	0.000143703	0.0038694
LPCAT3	0.0674813	4.23251	0.000144392	0.00388414
FOXO3	-0.0979499	8.53543	0.000144459	0.00388414
HIPK2	0.105562	5.8914	0.00014457	0.00388432
RBM23	0.0568052	7.21687	0.000144888	0.00389005
POLR2C	0.04518	4.97176	0.000145795	0.00391158
LINC00920	-0.117421	1.78228	0.000146563	0.00392935
CLLU1	0.354318	-0.829893	0.000146952	0.00393697
FGFR1OP2	-0.0982419	6.8576	0.000147189	0.00393842
HNMT	-0.0987478	4.0325	0.000147218	0.00393842
ZNF441	-0.146831	4.28358	0.000147476	0.00394251
TPPP3	-0.115917	1.11302	0.000147843	0.00394911
RNU1-28P	-0.438715	1.05768	0.000148057	0.00394911
RPL24P2	-0.268605	-2.15977	0.000148134	0.00394911
TFR2	-0.138147	1.85614	0.000148147	0.00394911
ZNF672	0.0479954	4.74066	0.000149327	0.00397771
RNU1-27P	0.497738	2.2764	0.000150422	0.00399699
USP7-AS1	-0.130205	0.979692	0.000150448	0.00399699
GDI2	-0.0750009	7.34465	0.000150449	0.00399699
GEMIN6	-0.0616136	3.28652	0.000150559	0.00399699
RPGRIP1	0.084429	3.46727	0.000150693	0.00399699
BAG3	0.079354	1.85989	0.000150694	0.00399699
RAB36	0.124535	1.26243	0.00015086	0.00399854
TRAM2	0.0721682	4.21444	0.000151502	0.00401271
HSFX1	0.214953	-1.33957	0.000151809	0.00401546
RPL23P6	-0.265169	-1.48049	0.000151873	0.00401546
DHX29	-0.0656382	5.18511	0.000151929	0.00401546
CD101	-0.0957711	4.45288	0.000152533	0.00402855
HBQ1	-0.157988	1.15266	0.000152763	0.00403177
CTNNBIP1	0.0829587	2.76733	0.000153122	0.00403838
ARL8BP2	0.0842669	1.44549	0.000153564	0.00404718
TNFSF14	0.0664145	6.29198	0.000154011	0.0040561
SAFB2	0.0461206	6.528	0.000154863	0.00407451
MT-ND1	0.198242	3.70329	0.000154929	0.00407451
PCED1A	0.0561224	4.39992	0.00015517	0.00407612
ARHGEF37	-0.14591	2.23241	0.000155209	0.00407612
MARCHF8	-0.129881	8.77412	0.000155423	0.0040771
SPINK2	-0.148943	-0.407868	0.000155465	0.0040771
SLC35F6	0.0836685	3.75512	0.000155653	0.00407915
MORF4L1P1	-0.0837236	3.04541	0.000155832	0.00408098
C9orf78	-0.144634	8.01168	0.000156488	0.00409435
HMOX2	0.0463781	5.027	0.000156603	0.00409435
GIT2	0.0599721	7.5246	0.000156672	0.00409435
CYP51A1P3	-0.148238	-0.589198	0.000157787	0.00412061
IGKV1-5	0.209935	2.22195	0.00015824	0.00412954
TACC1	0.0522085	8.16077	0.00015841	0.00413107
ANKRD13D	0.0819175	6.68369	0.000159086	0.00414068
MIR222HG	-0.0811094	1.69767	0.000159088	0.00414068
RNF11	-0.142157	7.92392	0.000159133	0.00414068
ZNF268	-0.103658	4.49151	0.000159223	0.00414068
PRDM1	0.0630622	5.4875	0.000159451	0.00414374
TRDD3	0.143766	-0.674022	0.000160082	0.00415722
MIR6731	0.0988738	0.00603764	0.000160423	0.00416294
PCBP1-AS1	0.0838636	6.99249	0.000160527	0.00416294
MTND5P26	0.12229	-0.719339	0.000160637	0.00416294
COA6-AS1	-0.0966622	1.00698	0.000160781	0.00416378
TRIB1	0.0664032	4.80054	0.000161336	0.00417523
SLC35A1	-0.119192	2.79028	0.000161459	0.00417553
IFNG	-0.171931	0.409059	0.000161655	0.00417553
LINC01762	0.0992222	1.96225	0.000161683	0.00417553
DNAJC10	-0.0798976	6.5299	0.000162412	0.00419057
FBXW5	0.0586809	5.98797	0.000162515	0.00419057
ZNF468	-0.0825528	4.48342	0.000162603	0.00419057
TMEM79	0.0739182	1.56203	0.000162866	0.00419444
MIR548C	0.129557	1.87286	0.000163083	0.00419713
KIF13A	0.071103	7.02815	0.000163549	0.00420623
RPS15AP19	-0.218254	-1.0599	0.000164208	0.00422025
CAMK1	-0.0848604	4.2899	0.000164351	0.00422102
COMMD3	-0.0935472	3.35605	0.000164731	0.00422788
KRT8P33	0.0846949	3.41255	0.000165317	0.00423926
RAP1BL	-0.17419	0.739536	0.000165439	0.00423926
ZFY	-0.112335	4.10917	0.000165516	0.00423926
RNU6-1176P	0.144748	-0.0234915	0.00016631	0.00425394
NFIA	-0.0715544	4.02909	0.000166317	0.00425394
ZNF398	0.0453876	5.37753	0.000166694	0.00426064
RPS3AP21	-0.281886	-2.07588	0.000166887	0.00426266
CIDECP1	0.0468935	3.01457	0.000167946	0.00428675
KDM5C-IT1	0.0666504	0.67376	0.000168095	0.00428764
TRAJ32	0.0842233	2.76504	0.000168281	0.00428945
SNX20	0.0685335	5.83015	0.000168406	0.0042897
SNORA23	-0.260781	4.43176	0.000168553	0.0042905
APBA2	0.0870954	4.9947	0.000168782	0.00429077
PELI2	0.0592018	7.10691	0.000168794	0.00429077
ARL11	0.0611217	6.03892	0.000169016	0.0042935
ZAP70	0.0735347	7.12488	0.000169548	0.00430406
OAT	-0.0733511	5.11204	0.000169913	0.0043067
ARHGEF7	0.0474533	6.28003	0.00016993	0.0043067
VDAC2P5	-0.153785	-1.33775	0.000169998	0.0043067
MYD88	0.0919837	6.12275	0.000170311	0.00431168
TSPOAP1	0.151517	3.9684	0.00017108	0.00432822
MTCO2P33	0.118219	0.657064	0.000171506	0.00433499
PSMG3	-0.054909	3.31022	0.00017158	0.00433499
PFKFB3	0.0988186	6.19549	0.00017278	0.00436235
PPP2R5C	0.051736	8.29138	0.000172956	0.00436382
IRAG1	0.0853883	5.99658	0.000173756	0.00438105
C1DP5	-0.122683	0.0759031	0.00017399	0.00438327
JAK3	0.116716	6.84434	0.000174079	0.00438327
CYBB	-0.0796922	9.41701	0.000174664	0.00439503
YBX3P1	-0.189016	-0.835355	0.000174806	0.00439564
CPSF3	-0.0483139	4.62689	0.000175288	0.00440477
RPS3AP6	-0.257948	1.51862	0.000175883	0.00441674
OLIG2	-0.170062	2.02822	0.000176289	0.00441776
OSBPL5	0.118987	4.66057	0.000176361	0.00441776
CEBPE	-0.115445	2.26188	0.000176439	0.00441776
ZCCHC10	-0.116339	2.85503	0.000176563	0.00441776
ABRACL	-0.0922549	4.50556	0.000176608	0.00441776
FAM210B	-0.147407	8.29491	0.000176891	0.00441776
RFPL4A	0.381714	-1.38769	0.000177023	0.00441776
PARAIL	0.0625891	3.877	0.000177108	0.00441776
LILRB3	0.105202	6.62693	0.000177178	0.00441776
FAM72B	-0.105939	-0.116125	0.000177219	0.00441776
TMOD1	-0.141799	5.1489	0.000177227	0.00441776
SUB1P3	-0.317004	-2.55592	0.000177863	0.00443064
FAM153A	0.134613	3.78661	0.000178276	0.00443796
MAPK6	-0.0645117	4.61324	0.000179014	0.00445337
TAP1	0.0745421	7.85616	0.000179424	0.00446057
GPX4	-0.0700531	5.4933	0.000179724	0.00446061
GUCD1	-0.110911	8.05802	0.000179731	0.00446061
TIMP1	0.10193	3.63606	0.000179784	0.00446061
ABCA6	0.244405	2.48236	0.000180264	0.00446953
TRPT1	0.0635023	1.9012	0.000180561	0.00447392
EEF1A1P25	-0.15361	-0.0588567	0.000180798	0.00447681
VSTM1	-0.132057	3.03403	0.000180924	0.00447697
CDH26	0.07144	3.24615	0.000181346	0.00448444
PRR14	0.0790014	3.86188	0.000181931	0.00449592
LINC00877	0.081498	4.40769	0.000182306	0.00450219
MEF2D	0.0871394	5.63141	0.00018317	0.00452054
NLRP6	0.100898	5.31392	0.000183423	0.00452378
EIF1B	-0.0702217	5.077	0.000183902	0.0045326
WDR91	0.0557334	4.87553	0.000184162	0.00453601
SUCLG2P2	-0.187902	-1.60202	0.000184701	0.00454628
RPL36AP15	0.0716381	0.908763	0.000185198	0.0045555
MRFAP1P1	-0.215585	-0.515554	0.000185794	0.00456589
RBM22	0.0420704	4.98953	0.000185865	0.00456589
ZNF831	0.0647402	6.06003	0.00018625	0.00456998
VCF1	-0.110423	7.50751	0.000186277	0.00456998
ACTG1P14	0.111302	0.686412	0.000186944	0.00458332
CERS2	0.0562498	6.3819	0.000187288	0.00458874
GLCE	-0.0588538	4.06623	0.000187496	0.00459081
RNU6-925P	0.0920116	-0.0726437	0.00018848	0.0046102
CD300A	0.0658072	6.85645	0.000188535	0.0046102
GPATCH8	0.0462995	6.57128	0.000188851	0.00461491
METTL9	-0.0757063	7.10452	0.000189083	0.00461754
GAS5	-0.123436	5.32351	0.000189399	0.00462223
IQSEC1	0.0849804	7.7034	0.000190445	0.00464471
RBSN	0.0372586	5.65022	0.000191163	0.00465916
COX7B	-0.107401	3.88339	0.000191431	0.00466266
TOP3A	0.060245	5.78163	0.000191927	0.00467103
LIX1L	0.0547306	5.42014	0.000192025	0.00467103
IER3	0.0929628	1.99231	0.000192169	0.00467108
RFC5	0.0326059	3.42122	0.000192278	0.00467108
RABGAP1L-DT	-0.154045	-0.515987	0.000194193	0.00471452
ITGA5	0.0714819	7.21226	0.000194461	0.00471796
RPS24	-0.126569	6.80361	0.000194748	0.00472184
IL2RB	0.130193	4.46879	0.000194947	0.0047236
DNAJB6	0.0592709	7.20214	0.000195486	0.00473358
SEC61A2	0.0633059	4.18349	0.000195866	0.00473911
LINC02422	0.116361	1.91435	0.000195969	0.00473911
PDPK1	0.076423	5.95839	0.000196167	0.00473928
TRIOBP	0.075324	5.91506	0.000196341	0.00473928
TMUB2	0.0604266	4.57208	0.000196357	0.00473928
SHLD2	-0.0887582	4.68576	0.000196616	0.00474189
ESM1	-0.1758	0.11218	0.00019672	0.00474189
RN7SL7P	-0.392031	-2.06969	0.000197035	0.00474642
HSP90B2P	-0.130657	1.22516	0.000197168	0.00474655
LINC02915	-0.144649	2.09343	0.000197596	0.00475378
SAP130	0.0571114	4.52605	0.000198553	0.00477349
ICAM4	-0.106414	2.92219	0.000198682	0.00477349
GPR75	0.0742207	1.87724	0.000198799	0.00477349
MIR4441	0.108535	0.067427	0.000199085	0.00477582
ADAR	0.0851886	8.8264	0.000199153	0.00477582
EEF1A1P5	-0.164106	5.68426	0.00019936	0.00477771
SNORD56B	0.126888	0.621281	0.000199963	0.0047891
RNU6-396P	0.117572	-0.931898	0.00020068	0.00480317
ZC3HAV1	0.0618735	7.99596	0.000202027	0.00482703
UBE2D3P1	-0.118212	0.0139484	0.000202053	0.00482703
SH3RF3	0.112731	2.93547	0.000202065	0.00482703
ARHGAP26-IT1	0.101255	4.05013	0.000202272	0.00482887
SLC1A5	-0.136265	5.67689	0.000202896	0.00484068
TP53I13	0.0605869	4.44021	0.000203366	0.00484877
PHAX	-0.0696341	4.53636	0.000203598	0.00485121
SLC15A4	0.060755	7.09665	0.000204605	0.00487209
ADGRG3	0.123481	5.60118	0.000206715	0.00491917
MTCO3P11	0.0911128	2.58082	0.000207193	0.00492343
WWP2	0.0797629	6.52131	0.000207312	0.00492343
TMEM127	0.0847918	6.56279	0.000207329	0.00492343
TLR6	0.0707912	7.61795	0.000207443	0.00492343
TNFRSF18	0.111605	1.88512	0.000207554	0.00492343
MX2	0.0930317	7.79851	0.000208473	0.00494208
CEP15	-0.13038	0.536336	0.00020874	0.00494526
ZNF525	-0.124387	4.14547	0.000209088	0.00495037
SCYL1	0.0635881	4.93824	0.000210106	0.0049713
MTG2	0.0767434	4.45221	0.000210458	0.00497647
CHPT1	-0.0914214	6.36061	0.000211061	0.00498757
CLEC4E	0.103992	6.59997	0.00021144	0.00499336
ATP5MGP6	0.138988	-1.00146	0.000212039	0.00500434
SNTB2	0.052465	5.8223	0.000213249	0.00502666
STRADB	-0.141493	9.41452	0.000213255	0.00502666
ATP6V1G2	0.0764596	0.685739	0.000213605	0.00503173
CTAGE6	-0.169069	-0.821374	0.00021445	0.00504844
SLC45A3	0.157884	2.61221	0.000215299	0.00506524
RNU6-946P	0.0951394	0.829387	0.000215593	0.00506894
TAF9P3	0.108863	-0.568854	0.000215795	0.0050705
SGO1	-0.118222	0.240113	0.000216103	0.00507454
HYPK	0.0554172	3.59764	0.00021711	0.00509498
MSANTD4	-0.0811323	4.73906	0.000217805	0.00510807
PRKCQ	0.0583217	5.78149	0.000218401	0.00511882
RTN4IP1	-0.0494969	3.00017	0.000219152	0.0051332
ANKRD22	0.209592	2.21139	0.000219458	0.00513353
NADK	0.081433	7.7429	0.000219481	0.00513353
C16orf87	-0.0483928	3.47805	0.000219579	0.00513353
DPY19L2	-0.139911	1.55846	0.000219879	0.00513732
COPS3	-0.0680263	5.35515	0.000220026	0.00513752
RN7SL732P	-0.340252	-2.20506	0.000220587	0.0051474
COMMD8	-0.162723	3.38197	0.000221589	0.00516754
ACTR3B	0.0474264	3.24894	0.000221766	0.00516844
UBAC2	0.0449529	6.02126	0.000222049	0.0051718
CIP2A	-0.0896373	3.22333	0.000222234	0.00517288
MOSPD1	-0.0928215	3.78164	0.00022262	0.00517842
SNRPD2	-0.135243	4.92136	0.00022275	0.00517842
MAL-AS1	0.10055	1.26121	0.000223728	0.00519587
BCAP29	-0.0636752	4.40112	0.00022378	0.00519587
LINC01446	-0.360939	-1.56927	0.000224124	0.00520062
NANOGP5	0.0839927	1.68238	0.00022565	0.00523007
ATAD2	-0.0679895	4.76041	0.000225674	0.00523007
HERC3	0.0586421	7.76026	0.000225899	0.00523203
RPSAP17	-0.152884	-1.12394	0.000226708	0.00524752
ESF1	-0.122458	3.54718	0.000227096	0.00525323
RANBP3	0.086133	4.73754	0.000228932	0.00528612
RPL5P34	-0.101406	0.424195	0.000228939	0.00528612
RN7SKP56	0.0914502	-0.376394	0.000229068	0.00528612
NCOR1	0.0542059	7.79536	0.000229119	0.00528612
GSDMA	-0.25852	-0.799118	0.000229227	0.00528612
TOP3B	0.0564638	4.81636	0.000229815	0.0052964
PNO1	-0.0484585	3.40493	0.000230416	0.00530697
SNORA14A	-0.234064	-0.559535	0.000231708	0.00533183
ZNF428	-0.0586506	3.85586	0.000231781	0.00533183
NUPR2P1	0.0575059	1.14589	0.000232552	0.00534516
PLOD2	-0.174791	0.80853	0.000232648	0.00534516
RPS21	-0.157848	6.58369	0.000233182	0.00535414
CAPS	0.068643	3.76237	0.000233611	0.00535781
RLIG1	-0.0921163	4.31102	0.000233725	0.00535781
RPSAP19	-0.1538	0.524822	0.000233774	0.00535781
LINC02019	0.0792489	1.13729	0.000235697	0.00539858
CXCR2	0.0992999	8.34261	0.000236739	0.00541912
MIR1282	-0.157915	-1.28095	0.000237675	0.0054372
MT-ND4	0.184752	4.6777	0.000238	0.00543724
ZNF492	-0.145608	0.123567	0.000238064	0.00543724
UBE2Q2P13	0.0663598	1.87981	0.000238236	0.00543724
MIR3135A	0.0988277	-0.587161	0.000238261	0.00543724
GADD45A	-0.0754381	3.37165	0.000239717	0.00546713
NRAS	-0.0693526	5.76056	0.000240435	0.00547963
MTCO1P11	0.119118	2.35744	0.000240559	0.00547963
AMPD2	0.0922018	6.66817	0.000240796	0.00548168
ANKZF1	0.0501617	6.27986	0.000241235	0.00548832
CLK2	0.0535849	5.07099	0.000241874	0.00549951
NDUFA4	-0.130388	4.78153	0.000243615	0.0055357
MIR103A1	-0.132415	-0.925901	0.00024393	0.00553948
MIR7161	0.0920277	1.96469	0.000244116	0.00554011
DHX57	-0.0437287	4.86912	0.000244255	0.00554011
YIPF3	0.0827185	4.03422	0.000244446	0.00554107
THAP4	0.063632	2.68031	0.00024529	0.00555683
PPP1R3E	0.0531771	4.60217	0.000245704	0.00556283
RNF130	0.0568364	7.82262	0.000247364	0.00559701
TESMIN	0.0621921	2.8478	0.000247553	0.00559789
SUMO1P3	-0.165989	-1.1305	0.00024861	0.00561734
NEIL1	0.0942496	3.03509	0.000248715	0.00561734
MIR6124	0.112622	1.43767	0.000249519	0.00563209
TMEM256	-0.121901	2.28092	0.000250113	0.00564207
TRGVA	0.231025	-2.47071	0.000250801	0.00565417
LAMB2P1	0.0681359	1.38345	0.000251453	0.00566545
FAM120B	0.0627863	6.35244	0.000252464	0.00568479
SNORD3B-2	-0.334308	3.10978	0.000253361	0.00570154
CKAP4	0.0750623	5.01977	0.000253681	0.0057053
ORMDL3	-0.0752469	7.02126	0.000253962	0.00570817
GATD1-DT	0.059838	2.20392	0.000254459	0.00571589
STAT5B	0.0725309	7.7462	0.000255608	0.00573826
DEF6	0.0505932	7.07933	0.000256068	0.00574511
CD83	-0.0751165	3.39109	0.000256355	0.00574809
ZBP1	0.0960019	5.94824	0.000256716	0.00575272
STOML2	-0.0707606	5.17266	0.000257174	0.00575952
SLC25A20	0.0729084	5.15344	0.000257968	0.00577384
ZNF404	-0.116184	0.610896	0.000258539	0.00578315
HLA-DRB6	-0.241746	2.54559	0.000259314	0.00579631
PLEKHF2	-0.0882845	5.80162	0.000259439	0.00579631
NOMO1	0.0763516	3.70049	0.000260106	0.00580635
RPL9P32	-0.224484	-0.420286	0.0002602	0.00580635
SEC24D	0.0451145	5.30036	0.00026117	0.00582452
HERPUD2	0.0440826	6.27034	0.000262224	0.00584452
PCLAF	-0.128816	-0.0333362	0.000264382	0.00588909
RNU6-100P	0.0794097	0.491769	0.000264781	0.00589447
IKZF1	0.0566363	8.75689	0.000265568	0.00590846
TIMM8B	-0.121024	3.47427	0.000265875	0.00591175
SLC35E2B	0.102843	5.22595	0.000266215	0.00591578
SUGT1P4-STRA6LP-CCDC180	0.100548	-0.494849	0.000266963	0.00592588
AZIN1	-0.0677195	7.14906	0.000266988	0.00592588
CENPH	-0.0832685	1.58624	0.000267227	0.00592766
CETN3	-0.124601	2.5739	0.000269545	0.00597553
CCR9	-0.133763	0.69529	0.000269887	0.0059787
SNORD9	-0.265471	1.51824	0.00027004	0.0059787
MIR613	0.133262	-1.09405	0.000270169	0.0059787
DDO	-0.124358	0.510886	0.000270646	0.00598569
MTCH1	0.0486031	6.30895	0.000270809	0.00598575
PPP1R3B	0.072883	7.39056	0.00027143	0.00599591
YDJC	0.0564655	3.31784	0.000273224	0.00603197
SLC25A28	0.044855	4.51144	0.000273539	0.00603536
KBTBD8	-0.13091	3.57083	0.000274338	0.00604637
GPATCH3	0.041234	3.21174	0.000274523	0.00604637
GSKIP	-0.104155	4.3917	0.000274525	0.00604637
FCF1P1	0.0953509	1.00957	0.000274974	0.00605267
SRCAP	0.0731953	3.98819	0.000275372	0.0060555
IRS2	0.0795006	5.73995	0.000275524	0.0060555
MAILR	0.0552565	3.48023	0.000275662	0.0060555
RSL24D1	-0.174554	5.08504	0.00027593	0.0060555
MIR3128	0.0867318	0.987405	0.000275979	0.0060555
CARS1	0.0448673	5.96963	0.000276077	0.0060555
LINC01801	0.0855817	1.50379	0.000277097	0.00607429
CCDC121	-0.0906042	1.36361	0.000277971	0.00608988
TRMT5	-0.0631189	2.9537	0.000278498	0.00609471
GAB3	0.0667072	5.95276	0.000278519	0.00609471
TMSB4XP2	-0.14345	1.07072	0.000279153	0.00610499
NKG7	0.12793	4.43575	0.000279443	0.00610776
STUB1	0.0495915	4.29224	0.000279783	0.00611159
LINC00377	0.33937	-2.45625	0.000280214	0.0061142
PCDH9	-0.162253	5.40025	0.00028023	0.0061142
ATP5PF	-0.0886242	2.77011	0.000280731	0.00612155
TIMM17A	-0.0644888	4.37038	0.00028112	0.00612324
CDK13	0.0402708	7.9813	0.000281137	0.00612324
XRCC6P2	-0.116671	0.0562371	0.000281355	0.0061244
LINC03033	0.0912097	0.0506609	0.00028216	0.00613834
PIGL	0.0485157	4.41974	0.000282405	0.00613889
NIPSNAP3A	-0.0995018	3.79465	0.000282515	0.00613889
CNOT1	0.0563748	8.11448	0.000282989	0.00614561
MYL6B	-0.103353	0.622876	0.000283708	0.00615765
RPL34	-0.205423	6.06085	0.000284709	0.00617565
TLE3	0.0824034	7.59633	0.000284869	0.00617565
DHX40P1	-0.268654	-2.48488	0.000285308	0.00618156
RPS3AP5	-0.239028	-0.976144	0.000285592	0.00618412
ZNF765	-0.111758	4.17529	0.000286065	0.00619077
LINC01126	0.072805	3.64275	0.000286517	0.00619696
SLC25A24	-0.0687268	5.69489	0.000286861	0.00620079
IRF9	0.0915926	4.20498	0.000287041	0.00620108
NFE2L1-DT	-0.0699448	1.69418	0.000287209	0.00620113
DNM1P47	0.0736594	2.04984	0.000288279	0.00621783
CTSE	-0.172015	1.41247	0.000288427	0.00621783
RNU6-176P	0.116415	-1.05824	0.000288483	0.00621783
RPL41	-0.170759	7.69114	0.000290011	0.00624368
FYN	0.0599894	8.05799	0.000290018	0.00624368
RNU7-13P	0.0893976	2.09503	0.000291314	0.00626497
HMGB1P20	0.103986	0.0688496	0.000291343	0.00626497
TRIAP1	-0.113402	2.39801	0.00029166	0.00626816
PEX19	0.0386263	4.16269	0.000291886	0.00626942
PRAF2	0.101107	0.355762	0.000292761	0.00628459
AHCYL2	0.0457337	4.71681	0.000293025	0.00628662
ETV6	0.0901958	5.5377	0.000294032	0.0063046
TRBV7-6	0.124378	-0.135006	0.000294492	0.00630886
LUNAR1	0.111788	0.878931	0.000294569	0.00630886
MBOAT7	0.113105	6.05734	0.00029535	0.00632194
TBCEL	-0.103627	5.53918	0.000297821	0.00637119
ATP5ME	-0.135516	3.1381	0.00029886	0.00638975
RFT1	0.0436797	4.56655	0.000299854	0.00640732
DNAAF11	0.116238	3.93267	0.000303753	0.00648691
JAZF1	-0.0961453	6.08016	0.000304719	0.00650381
ZNF319	0.0848382	3.56127	0.00030692	0.00654466
DEAF1	0.0711655	3.47482	0.000306984	0.00654466
LINC01507	-0.441614	-2.67559	0.00030768	0.00655575
MMS19	0.0496605	5.37109	0.000308779	0.00657033
TIRAP	0.0753948	3.74438	0.000308867	0.00657033
KDM7A-DT	-0.12775	3.96851	0.000309053	0.00657033
SNRNP25	-0.0650502	2.48062	0.00030907	0.00657033
ZNF681	-0.10438	3.09472	0.000310729	0.00660185
PRRC2C	0.0560791	8.42248	0.000311284	0.0066077
SDCBP2-AS1	0.0545857	3.30102	0.000311384	0.0066077
PIK3R5	0.0862572	7.13528	0.000311592	0.0066077
HELZ2	0.121419	6.33154	0.000311714	0.0066077
PABIR3	0.0476573	3.54025	0.000312963	0.00663041
TRDC	0.12367	4.29663	0.000315458	0.00667833
CCR5	-0.107512	4.55249	0.000315658	0.00667833
TPRG1-AS1	-0.11375	0.0870693	0.000315763	0.00667833
WDFY3	0.079965	8.68967	0.000316348	0.00668691
HS3ST3B1	0.055219	4.35587	0.000318188	0.006722
CDK2AP2	0.0995929	1.66035	0.000318662	0.00672641
RN7SL220P	0.0736843	1.86585	0.000318893	0.00672641
HSPE1P11	0.100656	0.374739	0.000318938	0.00672641
NFATC2	0.0648117	5.67844	0.000319758	0.00673987
PTPRJ	0.0728285	8.60794	0.000320145	0.00674421
RGS1	-0.153496	1.05251	0.00032152	0.00676935
APOBEC3A	0.087176	7.50576	0.000322192	0.00677591
CCT8P1	-0.0930399	0.850097	0.000322195	0.00677591
IFITM1	0.0976152	6.90458	0.000323264	0.00679456
ZNF730	-0.211319	-1.26396	0.000323518	0.00679607
EFCAB13	-0.0977592	3.61754	0.000324087	0.00680418
NCOA4P3	-0.138624	0.546568	0.000324788	0.00681507
TLCD2	-0.144446	0.995798	0.000325112	0.00681802
GID4	-0.0770278	4.31992	0.00032556	0.00682359
CSNK1G2	0.0646972	6.53666	0.000326136	0.0068318
RSPH14	0.116616	0.742806	0.000327637	0.00685939
SNORD46	-0.158969	-0.377924	0.00032815	0.00686627
ZNF813	-0.0952376	3.37044	0.000329432	0.00688922
RNU6-890P	0.0782596	1.43315	0.000332127	0.00694169
TECPR2	0.0856122	7.0874	0.000332388	0.00694326
MATN1-AS1	0.0851514	1.89479	0.000334181	0.00697428
LMOD1	-0.227618	0.0868162	0.000334247	0.00697428
ST6GALNAC4P1	0.0700285	0.59906	0.000335075	0.00698763
MARK2	0.0988618	5.5303	0.000336292	0.00700378
ZFY-AS1	-0.149115	-1.05139	0.000336471	0.00700378
ANKRD11	0.0875998	7.32789	0.00033655	0.00700378
USP22	0.0752063	6.15045	0.000336601	0.00700378
TAPBPL	0.0603941	5.22937	0.000337275	0.00701166
TGFA	0.0744628	4.97008	0.000337356	0.00701166
SNX15	0.0827711	1.02138	0.00033765	0.00701387
EPRS1	-0.0624033	6.23165	0.000338032	0.00701789
STRAP	-0.0653694	4.1509	0.000338931	0.00703264
ASLP1	0.125461	0.0451638	0.000339498	0.00704048
ANK1	-0.147865	5.64192	0.000340308	0.00705335
NUMB	0.0686719	7.34013	0.000340563	0.0070547
MYL6	-0.120343	8.40399	0.000340962	0.00705904
SDHC	0.0402832	5.93267	0.000341442	0.00706049
PRDX2	-0.119408	5.31742	0.000341531	0.00706049
RNU7-181P	0.107931	1.12349	0.000341703	0.00706049
ZNF37A	-0.0847714	5.18205	0.000341914	0.00706049
MYO1F	0.0874917	9.04079	0.000342028	0.00706049
UBN1	0.0902803	7.24528	0.000342272	0.00706049
RNVU1-33	0.120931	1.15997	0.000342487	0.00706049
PHACTR4	0.0687512	4.02841	0.000342547	0.00706049
RN7SKP95	0.0892746	1.80687	0.000342794	0.00706073
CDK11B	0.0519722	4.63897	0.000342938	0.00706073
RPL23	-0.192607	6.70484	0.000343437	0.0070671
HADH	0.0405297	4.11355	0.000343769	0.00707004
CERS4	0.0668744	3.73869	0.000344276	0.00707564
WDR45B	0.0387453	5.54916	0.000344813	0.00707564
ARL8A	0.0711368	3.93127	0.000344872	0.00707564
IL10	-0.171554	-0.88522	0.000344908	0.00707564
HSPBAP1	0.0584187	6.05042	0.000345331	0.00707564
USP36	0.0833467	4.72511	0.000345367	0.00707564
ANP32B	-0.0753124	4.95569	0.000345539	0.00707564
KLF17P1	0.0812769	1.78485	0.000345561	0.00707564
LINC02362	0.0871	3.95299	0.000346404	0.00708901
FGFBP3	-0.0549765	2.0431	0.000346813	0.00709349
ARV1	-0.057643	2.63808	0.000349041	0.00713514
NDUFA11	-0.0835966	3.84844	0.000350983	0.00717091
SND1-IT1	0.114077	2.46786	0.000351181	0.00717103
IER5	-0.06145	6.20179	0.000352188	0.00718764
SLC35A2	0.0481599	2.8788	0.000352508	0.00719025
KCTD10P1	0.17445	-0.987466	0.000352782	0.0071919
MAP9	-0.100448	2.93647	0.000353385	0.00719556
EIF2AK1	-0.103057	7.16645	0.000353392	0.00719556
PLEKHM1P1	0.0983055	6.40628	0.000353709	0.00719556
SNX22	-0.0883836	4.1997	0.000353734	0.00719556
TMEM184B	0.107916	4.1521	0.000354243	0.00720197
PTPN1	0.0474033	6.13776	0.000355324	0.00721662
USP30	0.0368446	3.37492	0.000355364	0.00721662
RPL21P44	0.0716508	2.29518	0.000355544	0.00721662
ZNF761	-0.0799761	3.48391	0.000355991	0.00722176
PAGR1	0.0670775	1.93222	0.00035647	0.00722754
ZNF438	0.0703119	5.18393	0.000359025	0.00727538
RGMB	0.0979752	2.87351	0.00035928	0.00727659
SLC39A6	-0.0518493	4.57473	0.000359622	0.00727955
TAPBP	0.109887	6.6649	0.000359988	0.00728302
APBB3	0.064724	3.90006	0.000360445	0.00728564
XKR6	0.0592867	3.57478	0.000360509	0.00728564
CKS1B	-0.088566	1.77393	0.000361974	0.00730695
NFATC3	0.0514654	6.98073	0.000362043	0.00730695
GK-IT1	0.113942	1.67298	0.000362356	0.00730695
FMNL1-DT	0.0785476	5.32069	0.000362402	0.00730695
B9D2	0.0535204	3.75262	0.000362544	0.00730695
STRADA	0.0484662	4.92904	0.000363991	0.00733152
SIGLEC17P	0.13125	0.643149	0.000364156	0.00733152
RNU1-91P	0.0817402	-0.0988728	0.000364949	0.00733306
SRPK2	0.0553899	7.49148	0.000364965	0.00733306
TMEM129	0.0685639	3.56097	0.000365003	0.00733306
COX7C	-0.14533	5.15058	0.000365102	0.00733306
TSN	-0.0626621	5.53937	0.000365217	0.00733306
UPF1	0.0728253	6.8837	0.00036585	0.00734183
ARHGAP25	0.0552268	8.53211	0.000366967	0.00735945
TPP1	0.0906764	5.2356	0.000367123	0.00735945
ALDH1A2	0.130379	2.82401	0.000367918	0.00737141
RILP	-0.123069	5.70838	0.000370386	0.00741688
WASHC2A	0.052259	5.41707	0.000371048	0.00742564
CPNE8	-0.0760188	4.43463	0.000371222	0.00742564
GLUD2	-0.125976	-0.152517	0.000372031	0.00743783
ZNF446	0.0696756	2.21356	0.000373158	0.00745636
RNF166	0.111613	5.71436	0.000373382	0.00745683
CRISPLD2	0.111241	6.74253	0.000374896	0.00748307
PPP2R1A	0.0461275	5.84483	0.000376105	0.00750318
TLK2	0.0384238	6.44836	0.000377067	0.00751786
RNU6-1152P	0.132138	-0.101411	0.000377245	0.00751786
LINGO2	0.170748	0.912394	0.000378038	0.00752965
COX7A2	-0.109808	5.07095	0.000378349	0.00753181
RGL2	0.0801501	6.05522	0.000379137	0.00754313
CTSL	-0.101675	3.35297	0.000379322	0.00754313
GTF2H3	-0.054669	4.12617	0.000379833	0.00754925
DDIT4	0.102667	5.38803	0.000380141	0.00755135
IFFO1	0.0788897	4.63126	0.000380913	0.00756266
RHOF	0.0804266	4.35461	0.00038171	0.00757445
C11orf58	-0.0760172	7.29608	0.000381979	0.00757575
GJA6P	0.137148	-0.270721	0.00038294	0.00759077
IGF2R	0.0924284	10.2759	0.000385903	0.00764227
KRT73	0.192323	2.79437	0.000385949	0.00764227
IRF7	0.114923	4.0504	0.00038626	0.00764437
ATG10-IT1	0.113573	-0.544193	0.000386653	0.0076481
CD93	0.088108	8.46938	0.000387971	0.00767009
FAM209A	0.0853292	0.0665934	0.000389026	0.00768688
ARF4P4	0.302244	-2.28244	0.000391163	0.007725
TIGD3	0.0926111	2.42121	0.000391601	0.00772956
SDHAP4	0.0481749	5.17238	0.000392119	0.00773361
IL1RAP	0.0794598	7.4193	0.000392221	0.00773361
CD300LB	0.0885311	4.89492	0.00039281	0.00774104
ZNF572	-0.0875794	2.28446	0.000393136	0.00774104
PKD1L3	-0.174414	0.321155	0.000393303	0.00774104
MTFP1	0.075839	0.423866	0.00039366	0.00774104
CIDEB	0.0656548	4.50836	0.00039382	0.00774104
RNU4ATAC	-0.284929	-0.508508	0.000393848	0.00774104
SNORD3A	-0.341347	2.64515	0.000394053	0.00774104
RHEBP1	-0.175753	-2.17689	0.000394303	0.00774188
SIK3	0.074351	6.69931	0.00039566	0.00776445
OXR1-AS1	-0.0870209	-0.273533	0.000397088	0.00778837
TRAJ35	0.077643	1.51124	0.000397733	0.00779691
OLA1	-0.0590219	4.10298	0.000398306	0.00780403
ASNSP4	0.698644	-3.31155	0.000399403	0.00782141
PADI4	0.109962	5.92527	0.000399693	0.00782291
UBE2F-SCLY	0.0810067	-0.332547	0.000399899	0.00782291
ZBTB33	-0.095171	5.23219	0.000400871	0.00783781
CCDC43	-0.0679255	3.97973	0.000403037	0.00787271
AGAP1	0.128131	3.71168	0.000403079	0.00787271
COG7	0.04839	3.77018	0.000403736	0.00788142
UBE4B	0.0605217	6.12545	0.000404262	0.00788755
RPS18P14	0.077753	0.958274	0.000404647	0.00789094
CSF3R	0.0868896	10.192	0.000405727	0.00790013
BRD1	0.0567885	5.66744	0.000405924	0.00790013
RNU6-653P	0.105308	-0.44916	0.000405959	0.00790013
CCDC92	0.0460878	4.29826	0.000405966	0.00790013
NINJ2-AS1	0.0662891	4.68789	0.000406467	0.0079029
AMFR	-0.0622859	6.58497	0.000406533	0.0079029
BTG2	0.086273	5.9462	0.00040713	0.00791037
AIDA	-0.0721926	5.64043	0.000408694	0.00793663
RNU2-63P	-0.265744	-2.48009	0.000409605	0.00794736
RERE	0.0775942	6.58664	0.000409673	0.00794736
ATP5PO	-0.0771963	3.89577	0.000410448	0.00795826
DGCR11	0.0903905	3.42068	0.000411092	0.00796659
TEPSIN	0.0875234	4.51577	0.000411778	0.00797426
SDC4	-0.0987403	1.46983	0.000411916	0.00797426
MBTPS1	0.0414871	6.78219	0.00041213	0.00797428
IFTAP	-0.103703	0.354924	0.000412501	0.00797731
UBE2O	-0.126522	5.31871	0.000413642	0.00799522
DROSHA	0.0466374	5.11982	0.000414704	0.00800549
TRAJ33	0.0813488	2.74441	0.000414798	0.00800549
ABHD5	0.0784029	7.91334	0.000414818	0.00800549
JTB	-0.0734147	4.38473	0.000415531	0.00801282
HIGD1A	-0.110027	3.82571	0.000415628	0.00801282
INTS3	0.0738633	5.76212	0.000416309	0.00802181
RNU6-646P	0.0967163	-0.153728	0.000416884	0.00802874
EIF2S1	-0.0738902	5.59744	0.000417791	0.00804172
ZBTB40	0.050577	6.2355	0.00041799	0.00804172
NFAT5	0.061458	7.60024	0.000419993	0.00807609
PNP	-0.0694644	5.87791	0.000422036	0.00810586
SLC14A1	-0.106359	5.69621	0.000422091	0.00810586
ZFAS1	0.0633082	6.0253	0.000422287	0.00810586
C1orf21	0.102102	4.7796	0.000422411	0.00810586
FOXK2	0.0572425	4.81703	0.000422679	0.00810682
MALINC1	-0.0847946	1.022	0.000423074	0.00811022
CYBC1	0.0901541	6.71804	0.000423721	0.00811663
LIN9	-0.085107	2.1813	0.000423844	0.00811663
NUP210	0.0826915	6.8925	0.000424854	0.00812559
DHRS9	0.107796	5.20002	0.000424898	0.00812559
FAM90A26	-0.746191	-3.29263	0.000425042	0.00812559
TBL1X	0.074987	6.70246	0.000425184	0.00812559
MC1R	0.0816427	3.04065	0.00042615	0.00813852
CDC42P6	-0.120441	0.948368	0.000426297	0.00813852
PGLS	0.0670836	4.04958	0.00042688	0.00814455
TRIM10	-0.136358	4.33848	0.00042705	0.00814455
ADCY10P1	0.062295	5.30555	0.000428334	0.00816459
OR52V1P	0.14113	-1.18856	0.000428539	0.00816459
CD180	-0.0844722	4.45122	0.000428806	0.0081655
LAPTM5	0.0687861	8.15761	0.000429277	0.00817029
NIPAL3	0.0479817	6.31061	0.000430674	0.0081927
ZNF445	0.0729301	6.6449	0.000434958	0.00826997
RASA2-IT1	0.0846772	1.84553	0.000436181	0.008289
MGAT1	0.0515151	7.38077	0.000436768	0.00829398
INPP5D	0.0832678	7.39135	0.000436889	0.00829398
RPL7	-0.244177	7.82353	0.000437131	0.00829437
RPS18	-0.136357	8.89221	0.000437622	0.00829946
RNU7-193P	0.148414	-1.96985	0.000440399	0.00834668
UTP3	-0.0806684	4.41066	0.000440561	0.00834668
ZNF724	-0.0620998	1.37474	0.000442421	0.00837633
GUSBP14	0.0967272	1.90413	0.000442701	0.00837633
LYRM2	-0.0847204	4.48397	0.000442799	0.00837633
NRIP1	-0.0766607	5.83128	0.000443039	0.00837661
RN7SL430P	0.0704711	1.05939	0.000443446	0.00838005
ZNF746	0.0777015	6.38555	0.000445365	0.00840548
EXT1	0.0545867	4.93745	0.000445489	0.00840548
CSNK1G1	0.0575204	4.66818	0.000445604	0.00840548
RPL24P7	-0.171676	-1.51478	0.000445694	0.00840548
IGHV3-30	0.180977	2.30529	0.000446889	0.00842352
HIF1AN	0.0556886	6.66501	0.000447102	0.00842352
MRPL15	-0.0753265	2.81244	0.000447443	0.0084244
POLR2K	-0.158977	2.99532	0.000447632	0.0084244
PHF21A	0.0573929	7.19106	0.000447827	0.0084244
DST	-0.0743542	5.14647	0.000448781	0.00843809
SCML4	0.0610122	6.01912	0.000449831	0.00845338
CD37	0.0936156	6.18533	0.000450048	0.00845338
MRPL32	-0.0970556	4.06848	0.000451165	0.00846691
IGHEP2	0.0926266	2.51083	0.00045126	0.00846691
VPS50	-0.0893717	5.85851	0.00045145	0.00846691
CDC27	-0.0604248	6.66989	0.000451764	0.00846853
RNU5A-1	-0.304759	1.20498	0.000452004	0.00846877
MT-CYB	0.172219	4.53172	0.000454587	0.00850807
ISG20	0.0648658	6.64513	0.00045468	0.00850807
SLC25A6P3	0.101537	-0.254254	0.000454807	0.00850807
RPL21P90	0.110416	-1.24659	0.000455015	0.00850807
LINC02562	-0.370398	-2.14238	0.000455372	0.00851047
LINC00528	0.0641542	3.34959	0.000460374	0.0085981
PCGF5	-0.0823237	7.38884	0.000460522	0.0085981
TCF3P1	0.10552	2.7812	0.000461126	0.00860506
RPL21	-0.170734	8.14091	0.000461421	0.00860626
RNU6ATAC	-0.322326	2.93008	0.000462646	0.0086248
[truncated: 35,267 more rows]

## Sheet: Severe Stage
ID	logFC	AveExpr	P.Value	adj.P.Val
IGLV9-49	1.68118	-1.38574	1.08859e-46	4.05673e-42
IGHV2-26	1.16788	-0.639175	5.18782e-33	9.66646e-29
RNU1-29P	-3.42376	-1.07703	1.46375e-26	1.81827e-22
IGHV2-5	-0.283441	0.850986	1.42402e-21	1.32669e-17
RNVU1-32	-1.16166	0.13901	3.75774e-18	2.80072e-14
SNORD3C	1.16439	-0.259987	4.70505e-18	2.9223e-14
RNVU1-2A	-0.655661	-1.45987	6.23043e-16	3.3169e-12
RN7SKP90	1.58109	0.145723	7.14613e-16	3.32885e-12
RNU1-83P	-1.31721	-0.394769	9.11589e-16	3.77458e-12
IGHD3-22	0.957905	-2.70372	2.5385e-14	9.45999e-11
RNU2-36P	-1.37146	-1.92923	3.97937e-14	1.34814e-10
EVPL	-0.594614	1.18788	8.7368e-14	2.71321e-10
KRT79	-0.96476	0.065308	1.1615e-13	3.32958e-10
MIR3181	0.23474	0.730993	5.37561e-13	1.43091e-09
RAB33B-AS1	0.132891	4.91337	1.28625e-11	3.19555e-08
SPTB	-0.481462	5.93775	1.71741e-11	4.00006e-08
ARHGEF12	-0.290428	7.06793	1.97017e-11	4.31884e-08
TRIM58	-0.411168	9.00828	6.67e-11	1.31015e-07
IGLV5-45	-0.595984	-0.731278	6.67978e-11	1.31015e-07
RNU1-18P	-1.53691	-1.96351	9.86655e-11	1.83844e-07
TRDJ3	0.306666	0.6335	1.39641e-10	2.47803e-07
SPTA1	-0.34576	4.03056	1.51352e-10	2.56377e-07
TNS1	-0.40991	7.17566	4.34327e-10	7.03724e-07
ARHGEF37	-0.347373	2.23241	5.60487e-10	8.70296e-07
ANK1	-0.367095	5.64192	6.61645e-10	9.78987e-07
NPIPB8	0.535539	-1.25018	6.84455e-10	9.78987e-07
ABCG2	-0.323508	2.43179	7.09297e-10	9.78987e-07
CDC42BPA	-0.282596	3.70349	8.39088e-10	1.09918e-06
CEBPD	0.207983	6.76579	8.55367e-10	1.09918e-06
C17orf67	0.111895	3.07856	9.03848e-10	1.12276e-06
DUSP1	0.206837	8.55734	1.12534e-09	1.3528e-06
OR2W3	-0.409382	4.02499	1.24654e-09	1.45167e-06
ACHE	-0.48053	0.404951	1.35466e-09	1.52978e-06
OR7E115P	-1.20146	-3.03775	1.50039e-09	1.64452e-06
TLCD2	-0.354102	0.995798	1.79508e-09	1.87367e-06
CDC42EP2	0.235068	1.09537	1.81002e-09	1.87367e-06
POLR2C	0.0999124	4.97176	2.31689e-09	2.33354e-06
DALRD3	0.113189	3.89096	2.83556e-09	2.78079e-06
RAB13	-0.375754	-0.577925	3.32646e-09	3.17856e-06
IGF2BP2	-0.317604	4.91676	3.55405e-09	3.31113e-06
EPB41	-0.274298	10.74	3.86778e-09	3.51553e-06
LMOD1	-0.559018	0.0868162	4.03877e-09	3.58354e-06
SEC14L5	-0.446932	1.55037	4.37692e-09	3.68241e-06
MRPL10	0.124419	3.06166	4.3902e-09	3.68241e-06
SLC7A5P1	0.148471	1.67314	4.44664e-09	3.68241e-06
B3GALT4	0.121594	4.8921	4.59592e-09	3.7233e-06
CNTNAP3P2	-0.545283	-0.0746232	4.82933e-09	3.82914e-06
DCLRE1CP1	-0.828571	-2.32065	5.0762e-09	3.94104e-06
H3-3A-DT	0.14809	3.1571	5.48485e-09	4.1714e-06
PI16	0.240138	2.15717	5.86094e-09	4.36828e-06
APOBEC2	-0.393692	-0.562355	6.75671e-09	4.93717e-06
KANK2	-0.388262	2.66759	7.51277e-09	5.38405e-06
ODC1	-0.252726	7.60849	8.14185e-09	5.72479e-06
LINC00921	0.133925	5.35999	8.35723e-09	5.76742e-06
FCGR2A	0.162838	9.4358	8.87983e-09	6.01665e-06
TMEM185B	0.126808	4.315	1.07991e-08	7.18639e-06
B3GALT6	0.106381	4.23754	1.12222e-08	7.2606e-06
NFE2L2	0.127713	6.46278	1.14817e-08	7.2606e-06
CCDC71	0.111811	4.02975	1.14951e-08	7.2606e-06
LINC00623	0.181156	3.75108	1.18015e-08	7.32993e-06
FAM83A	-0.747042	-0.237188	1.23392e-08	7.46866e-06
ERVK3-1	0.118646	4.97008	1.24257e-08	7.46866e-06
ACOT8	0.0891764	4.61492	1.3031e-08	7.70812e-06
NEIL2	-0.161092	3.502	1.35196e-08	7.87218e-06
TTC38	0.174923	5.06444	1.52517e-08	8.74416e-06
RAD9B	-0.18439	0.34339	1.59726e-08	8.96615e-06
TBC1D3E	-0.860033	-2.1544	1.61201e-08	8.96615e-06
LINC01126	0.158272	3.64275	1.81059e-08	9.92259e-06
TAF10	0.10129	5.06701	2.02509e-08	1.09372e-05
SLC30A8	-0.847322	-0.901897	2.09299e-08	1.11425e-05
TENT5C	-0.358174	9.91536	2.29616e-08	1.20519e-05
RNU1-67P	-1.18002	2.78262	2.46492e-08	1.2758e-05
KIAA0040	0.125777	7.15424	2.63863e-08	1.33414e-05
FKBP1B	-0.257501	1.4612	2.65089e-08	1.33414e-05
RABIF	0.0900988	4.03696	2.68504e-08	1.33414e-05
CARD17P	0.290663	2.3889	2.88152e-08	1.4047e-05
TRDJ2	0.264495	0.70025	2.90243e-08	1.4047e-05
JUNB	0.158185	7.2783	3.00266e-08	1.42627e-05
GLYATL2	-0.804073	-1.36429	3.0417e-08	1.42627e-05
RPIA	-0.23453	6.21116	3.06181e-08	1.42627e-05
PBX1	-0.258932	3.71713	3.13924e-08	1.43895e-05
DPCD	-0.261647	2.68641	3.16627e-08	1.43895e-05
SPECC1	-0.203604	7.41288	3.40424e-08	1.52846e-05
SNCA	-0.308045	10.4119	3.45079e-08	1.53092e-05
KIF14	-0.305866	2.05637	3.52976e-08	1.54649e-05
USP12	-0.250062	6.82978	3.58813e-08	1.54649e-05
KCNA3	0.15401	5.38394	3.61039e-08	1.54649e-05
IGKV5-2	0.371155	-1.7007	3.87975e-08	1.64079e-05
ZXDA	0.121497	3.38724	3.95424e-08	1.64079e-05
OR2T8	-0.433989	-0.883287	3.9977e-08	1.64079e-05
YRDC	0.11918	3.65443	4.00665e-08	1.64079e-05
MKRN1	-0.261957	10.0627	4.314e-08	1.74745e-05
IFITM1	0.207933	6.90458	4.46409e-08	1.78881e-05
CALHM5	-0.326515	0.550894	4.75716e-08	1.8787e-05
PITHD1	-0.299509	7.28376	4.78927e-08	1.8787e-05
H3C11	0.189559	4.24622	4.87362e-08	1.89188e-05
IGLV3-21	0.456368	1.65723	4.95079e-08	1.90202e-05
SLC6A9	-0.348661	2.1671	5.12801e-08	1.95001e-05
BAG1	-0.251326	7.89944	5.22904e-08	1.96834e-05
SIDT1	0.121757	5.92862	5.6251e-08	2.09625e-05
PLSCR4	-0.297443	0.477754	5.77038e-08	2.10832e-05
MIR3945HG	0.261415	2.22927	5.77064e-08	2.10832e-05
LINC02863	0.165668	5.84617	6.07102e-08	2.17997e-05
ANKRD39	0.0869334	2.43185	6.09738e-08	2.17997e-05
CTNNAL1	-0.311142	2.9595	6.16568e-08	2.17997e-05
TRDJ4	0.26312	0.605532	6.20075e-08	2.17997e-05
OSBP2	-0.34636	5.60709	6.78761e-08	2.36399e-05
HK1	-0.190383	6.29139	6.89798e-08	2.38019e-05
PRDM1	0.126458	5.4875	7.2518e-08	2.47932e-05
ODAD4	-0.302779	1.05748	7.62901e-08	2.5812e-05
TMEM216	0.107546	3.04267	7.70071e-08	2.5812e-05
TCFL5	0.102784	3.49719	7.75759e-08	2.5812e-05
RPL31P43	-0.30365	-0.0952325	8.70329e-08	2.86226e-05
UBE2O	-0.274751	5.31871	8.7559e-08	2.86226e-05
RABGAP1L-DT	-0.323787	-0.515987	9.2084e-08	2.984e-05
COPS8P2	0.248009	1.32063	9.61987e-08	3.08897e-05
TMOD1	-0.289282	5.1489	9.73656e-08	3.08897e-05
LINC01138	0.121821	5.22763	9.78098e-08	3.08897e-05
LRRC2	-0.434968	0.387921	1.01786e-07	3.18753e-05
TRIM10	-0.295963	4.33848	1.0532e-07	3.26927e-05
BBOF1	-0.277741	4.24965	1.06151e-07	3.26927e-05
CEBPB	0.148899	7.34324	1.08125e-07	3.29029e-05
MKRN8P	-0.540343	-1.73264	1.08599e-07	3.29029e-05
TPPP3	-0.234626	1.11302	1.10914e-07	3.33332e-05
BPGM	-0.312501	7.0631	1.17938e-07	3.51605e-05
CISD2	-0.244617	5.37939	1.31896e-07	3.88508e-05
IGLV3-25	0.507846	1.00699	1.32401e-07	3.88508e-05
FCGR1CP	0.358147	2.44145	1.36083e-07	3.96193e-05
CDK5R1	0.174088	4.30818	1.60561e-07	4.63833e-05
MXD3	0.151883	5.27555	1.63999e-07	4.70122e-05
TFAP2E-AS1	0.127837	2.74787	1.6735e-07	4.76066e-05
PGP	0.111349	4.07526	1.68915e-07	4.76877e-05
TRDD3	0.277622	-0.674022	1.7258e-07	4.83563e-05
TRIM8-DT	0.158726	2.46773	1.74728e-07	4.8397e-05
MMP14	-0.272496	0.845783	1.76176e-07	4.8397e-05
YPEL4	-0.261367	0.831023	1.77157e-07	4.8397e-05
GOLGA8N	0.189943	3.23222	1.77921e-07	4.8397e-05
NFXL1	0.266827	5.29211	1.87398e-07	5.06055e-05
RN7SL678P	-0.778491	-2.41091	1.94233e-07	5.20739e-05
SRRD	-0.192748	5.08771	2.04462e-07	5.43918e-05
HIGD2A	0.157373	4.43345	2.06098e-07	5.43918e-05
TNNT1	-0.396918	1.3477	2.07257e-07	5.43918e-05
SLC6A8	-0.373189	5.10403	2.091e-07	5.44917e-05
RN7SL14P	-0.828278	1.60153	2.27499e-07	5.88748e-05
NEXN	-0.20013	2.02981	2.42493e-07	6.21523e-05
VPREB1	-0.796354	-2.36827	2.43499e-07	6.21523e-05
KLF6	0.108385	8.22843	2.53119e-07	6.41682e-05
STS	0.119413	3.22775	2.73467e-07	6.88583e-05
YIPF1	0.0949121	4.55945	2.86628e-07	7.16879e-05
RN7SL33P	-0.872915	-1.7736	2.88768e-07	7.17415e-05
MKRN4P	-0.366238	-0.252782	2.93838e-07	7.25175e-05
MGST1	-0.149465	2.54614	2.96799e-07	7.27666e-05
TDRD12	-0.548143	0.519102	3.05136e-07	7.43215e-05
CDC34	-0.252978	7.73923	3.11679e-07	7.54222e-05
USP34-DT	0.119081	3.20948	3.19002e-07	7.63875e-05
ZDHHC1	-0.24212	0.942466	3.21948e-07	7.63875e-05
ESM1	-0.358306	0.11218	3.22771e-07	7.63875e-05
BORCS6	0.104069	4.16195	3.23867e-07	7.63875e-05
ALDH2	-0.152751	4.06043	3.30715e-07	7.75121e-05
YDJC	0.111227	3.31784	3.52119e-07	8.15778e-05
EFNA4	0.102973	2.05973	3.5244e-07	8.15778e-05
TRDJ1	0.252426	1.16303	3.55982e-07	8.18891e-05
LAMB2	-0.357554	0.892899	3.59785e-07	8.22561e-05
RNF149	0.121275	9.64609	3.68327e-07	8.36956e-05
JSRP1	-0.212547	1.9884	3.73914e-07	8.44503e-05
EGR3	-0.58188	-0.621935	3.79673e-07	8.52344e-05
CASP5	0.240197	4.0449	4.04717e-07	8.98829e-05
DPY19L3-DT	0.130886	1.93181	4.07516e-07	8.98829e-05
SLC46A3	0.0949857	4.75611	4.07616e-07	8.98829e-05
TSSK6	0.120721	1.79016	4.17653e-07	9.15544e-05
GLRX5	-0.286732	7.5296	4.2481e-07	9.23035e-05
RNU1-88P	-0.864798	-0.556642	4.26024e-07	9.23035e-05
OPTN	-0.181731	6.89823	4.41815e-07	9.47849e-05
FCGR1BP	0.255468	4.76295	4.42564e-07	9.47849e-05
LIMD2	0.114624	7.88192	4.51118e-07	9.52124e-05
C1orf116	-0.293842	0.673956	4.51902e-07	9.52124e-05
CKAP2-DT	-0.278951	-0.700117	4.55495e-07	9.52124e-05
KRT18P15	0.260718	1.21091	4.60285e-07	9.52124e-05
TGFBR2	0.0926681	8.58108	4.6165e-07	9.52124e-05
RN7SL597P	-0.693627	-2.33524	4.62338e-07	9.52124e-05
SLC7A5	-0.276644	2.80847	4.62444e-07	9.52124e-05
PABPC1P3	0.122019	2.11853	4.80929e-07	9.84742e-05
SUGT1P4-STRA6LP	0.114717	2.66482	5.14279e-07	0.000104727
HSPA6	0.161008	7.16053	5.22478e-07	0.000105819
MARS2	0.0986348	4.01586	5.37735e-07	0.000108083
HBZ	-0.723508	-2.48634	5.42349e-07	0.000108083
EIF4E3	0.144919	7.5965	5.42356e-07	0.000108083
VWA8-AS1	-0.61374	-1.61829	5.63835e-07	0.000111765
LINC01435	-0.860064	-0.854152	5.69305e-07	0.000112253
TRIP10	-0.275576	0.476939	5.78812e-07	0.000113526
IGLV3-9	0.216723	2.20484	5.92898e-07	0.000115455
SLFN14	-0.25873	3.10966	6.00763e-07	0.000115455
CCDC85B	0.138275	4.2334	6.00983e-07	0.000115455
IRF1	0.120147	9.33091	6.01038e-07	0.000115455
RUNDC3A-AS1	-0.368098	0.102442	6.06082e-07	0.000115827
HCG27	0.134719	7.78568	6.13686e-07	0.000116682
RAP1GAP	-0.634833	2.70421	6.24759e-07	0.000118184
MAF1	-0.183733	6.98697	6.40341e-07	0.000120031
KLRC4	0.265595	2.98175	6.40964e-07	0.000120031
TPTEP2-CSNK1E	0.155634	0.381421	6.453e-07	0.000120239
DDB1	-0.122615	7.17665	6.52291e-07	0.000120937
DMC1	-0.40123	-0.34333	6.59143e-07	0.000121602
ENTPD5	-0.131239	4.14999	6.65204e-07	0.000122067
SLC4A1	-0.329171	8.9723	6.68216e-07	0.000122067
LINC02256	0.128523	1.9729	6.81066e-07	0.000123808
CNPPD1	-0.193764	4.938	6.89993e-07	0.000124822
TRAV30	0.223339	0.379352	7.00426e-07	0.000126097
CDCA4P4	0.12504	2.15583	7.10612e-07	0.000127316
RGS19	0.128697	6.01518	7.52602e-07	0.000134194
DNAJB2	-0.19601	6.61484	7.57692e-07	0.000134458
DNAJA4	-0.207695	5.317	7.6873e-07	0.00013577
BTD	0.0810555	4.23669	8.01557e-07	0.0001409
TRAK2	-0.182965	7.53259	8.07121e-07	0.000141212
SHE	-0.548141	-0.397973	8.12267e-07	0.000141448
PPP1R3D	0.105037	5.42978	8.20666e-07	0.000142246
RIOK3	-0.226324	8.6134	8.5214e-07	0.000147018
EPB42	-0.312115	6.8599	8.88543e-07	0.000152521
KIF15	-0.276994	1.93665	8.92226e-07	0.000152521
TAGAP	0.112125	7.56764	9.02794e-07	0.000153603
CCDC92	0.0901417	4.29826	9.06794e-07	0.000153603
TLCD4	-0.255124	4.33144	9.40816e-07	0.000158645
NFIX	-0.273134	3.50118	9.45283e-07	0.00015868
NFE4	0.203416	3.16162	9.49842e-07	0.00015873
FRAT1	0.130801	6.54252	9.63069e-07	0.000160185
FAM3B	-0.682483	0.270431	9.67145e-07	0.000160185
COQ10A	0.0827326	2.72834	9.78101e-07	0.000161283
CCNL2	0.0886297	7.24727	9.84787e-07	0.00016167
ATP6V0E2-AS1	0.129648	2.73076	9.89934e-07	0.000161802
PTGER2	0.122148	4.85036	1.00288e-06	0.000163202
RERE-AS1	0.152068	2.0874	1.01188e-06	0.000163951
EMILIN1	-0.258743	0.952781	1.02286e-06	0.000165013
MKRN9P	-0.330491	-0.251033	1.03588e-06	0.00016614
MRC2	-0.27064	4.89911	1.03877e-06	0.00016614
ORAI1	0.125998	4.09091	1.0441e-06	0.00016628
PPP1R35	0.12439	3.6525	1.08581e-06	0.000171198
E2F2	-0.294575	5.49237	1.09002e-06	0.000171198
ST6GALNAC6	0.14345	3.3679	1.09323e-06	0.000171198
LMNA	-0.200621	3.45465	1.09336e-06	0.000171198
RBM15B	0.0737653	5.69245	1.10055e-06	0.000171602
RN7SL736P	-0.662414	-1.12397	1.11966e-06	0.000173855
YBX3P1	-0.357093	-0.835355	1.1311e-06	0.000174903
NRF1	0.0843608	5.24671	1.15211e-06	0.000177416
H2BC21	0.139352	6.8263	1.18481e-06	0.0001817
MSANTD3P1	-0.269942	-1.10041	1.25782e-06	0.000192106
ATP6V0B	0.113163	7.39085	1.29746e-06	0.000197352
TTC23	-0.286206	0.833341	1.30607e-06	0.000197854
DDO	-0.239482	0.510886	1.32436e-06	0.000199763
GCSAM	0.136588	3.83394	1.33033e-06	0.000199763
RASSF1-AS1	0.169959	1.58606	1.33475e-06	0.000199763
SCAND2P	0.0989012	5.59687	1.35074e-06	0.000201347
TSNAXIP1	-0.335302	-0.334307	1.38683e-06	0.000205902
ATF5	-0.18082	1.41508	1.39412e-06	0.000206165
LINC00677	0.193986	2.30839	1.40293e-06	0.000206647
SHISA7	-0.587039	-0.678358	1.41197e-06	0.000207159
RASSF5	0.103336	7.70272	1.4377e-06	0.000210108
KLF2	0.11385	6.9519	1.45682e-06	0.00021207
EIF2AK1	-0.197929	7.16645	1.49449e-06	0.000216638
RN7SL239P	0.113189	2.58582	1.50022e-06	0.000216638
ACTR3C	0.0992913	4.18682	1.50826e-06	0.000216638
BCL2L1	-0.266616	8.90893	1.51145e-06	0.000216638
LINC02772	-0.321527	1.51178	1.52008e-06	0.00021704
COL8A2	-0.265624	0.491878	1.56539e-06	0.000222656
ANP32B	-0.143612	4.95569	1.66088e-06	0.00023534
KIF23	-0.209962	1.72061	1.69569e-06	0.000239362
LINC02100	0.126518	2.27914	1.72815e-06	0.000243024
PRSS35	-0.427783	-0.61108	1.75594e-06	0.000245321
RNF169	0.0942032	7.64149	1.75926e-06	0.000245321
PLOD2	-0.328113	0.80853	1.76424e-06	0.000245321
PPP3CC	0.103073	5.91664	1.77919e-06	0.000245695
IGKV1D-12	0.614566	-2.73752	1.78228e-06	0.000245695
NOD2	0.185391	5.96153	1.78905e-06	0.000245695
MAFA	-0.502897	-1.03008	1.7933e-06	0.000245695
HMMR	-0.354594	0.239798	1.80325e-06	0.000246153
TP53I13	0.109407	4.44021	1.86788e-06	0.00025379
LINC01446	-0.706612	-1.56927	1.87922e-06	0.00025379
SFRP1	-0.685106	-0.461745	1.88206e-06	0.00025379
MAGI2-AS3	-0.314945	1.42733	1.88644e-06	0.00025379
FAAH2	0.16613	3.23815	1.91867e-06	0.000257198
DFFB	0.0685691	3.98277	1.95326e-06	0.000260896
SNAI3	0.135691	2.72841	1.97542e-06	0.000261773
RNVU1-29	-0.708906	3.38476	1.97641e-06	0.000261773
PPM1D	0.0715311	4.84527	1.98211e-06	0.000261773
HEXIM2-AS1	0.0997575	4.51909	1.98792e-06	0.000261773
CD8B2	-0.388886	0.38327	1.99704e-06	0.000262048
CCR5AS	-0.248035	1.2675	2.02185e-06	0.000264238
EGR1	-0.423528	-0.071176	2.02791e-06	0.000264238
H2BC18	0.139022	6.69793	2.03572e-06	0.000264332
PTPRG	-0.490776	1.22845	2.05071e-06	0.000265353
WAKMAR2	0.127654	3.4359	2.10577e-06	0.000271535
FZD5	-0.159928	2.33309	2.1347e-06	0.000274083
FLACC1	-0.166358	3.61653	2.14024e-06	0.000274083
TRBV6-1	0.202749	0.367987	2.19679e-06	0.000279522
COX19	0.0781584	5.47205	2.19771e-06	0.000279522
COG8	0.0715916	5.08762	2.21358e-06	0.000280583
TRIM36	-0.215855	1.38415	2.22841e-06	0.000281505
ZNF792	0.0850495	4.78661	2.29342e-06	0.000288739
SNTB2	0.094048	5.8223	2.31705e-06	0.000290731
TMEM200B	-0.400962	0.580275	2.3411e-06	0.000292763
INTS15	0.0845323	4.65796	2.394e-06	0.000298377
SMG1P6	0.205905	2.92335	2.42539e-06	0.000300495
HS3ST3B1	0.101711	4.35587	2.42712e-06	0.000300495
INKA2	0.140271	3.81987	2.51432e-06	0.000310261
JMJD4	0.0980003	4.37337	2.55123e-06	0.000312804
GSPT1	-0.222998	8.56992	2.55172e-06	0.000312804
LDHC	-0.661392	-1.24005	2.5625e-06	0.000313096
CLEC4G	-0.342462	-0.538849	2.59679e-06	0.000316249
DEGS1	0.0939575	5.81169	2.62133e-06	0.000317791
KRT1	-0.378369	5.5959	2.62651e-06	0.000317791
NSMCE4A	0.0844498	5.06588	2.66351e-06	0.000321006
H2BC12	0.133324	6.40379	2.67031e-06	0.000321006
MTFMT	0.0799837	4.21877	2.6805e-06	0.000321195
ZG16B	-0.243881	-0.0650829	2.69411e-06	0.000321791
LINC03014	-0.125676	2.50986	2.708e-06	0.000322416
FECH	-0.266766	7.62979	2.72728e-06	0.000323677
GUCD1	-0.198062	8.05802	2.73783e-06	0.000323898
TIGD5	0.103832	3.20677	2.75605e-06	0.000325022
TRBV5-6	0.229709	0.689459	2.7672e-06	0.000325307
RBM38	-0.254187	8.0744	2.8468e-06	0.000333612
FOXO4	-0.221251	7.04558	2.90975e-06	0.000339921
OLFM1	-0.423106	1.07492	2.97766e-06	0.000346767
NECTIN2	-0.534543	1.5906	3.00263e-06	0.000348585
KANTR	0.100386	5.01535	3.01725e-06	0.000349195
TRDC	0.224687	4.29663	3.03938e-06	0.000350667
BAZ2B-AS1	0.160834	3.06918	3.05982e-06	0.000351936
IFIT1B	-0.300371	5.10926	3.07677e-06	0.000352797
SDC4	-0.187073	1.46983	3.10869e-06	0.000355364
MARCHF8	-0.228395	8.77412	3.12129e-06	0.000355712
EMP1	-0.274202	1.52671	3.1717e-06	0.000359828
RNU4-62P	0.11861	2.1642	3.17672e-06	0.000359828
C1orf54	-0.236315	-0.166421	3.19215e-06	0.000360164
PEX19	0.0699717	4.16269	3.2078e-06	0.000360164
MKNK1	0.127704	6.59933	3.20965e-06	0.000360164
PPP1R3F	0.0909763	4.10828	3.21833e-06	0.000360164
ERBIN-DT	0.136236	1.17801	3.28946e-06	0.000367021
PTPRF	-0.400174	1.72835	3.3162e-06	0.000367896
DUX4L8	-0.916113	-1.85252	3.31763e-06	0.000367896
EPPK1	0.226987	3.35058	3.32692e-06	0.000367896
ZNF524	0.0975626	3.50355	3.44601e-06	0.000379938
ZBTB11-AS1	0.0866377	3.94758	3.46205e-06	0.00038058
ZBTB49	0.0731224	4.05041	3.51149e-06	0.00038488
GZMB	0.207311	5.44086	3.52557e-06	0.00038529
RGMB	0.178461	2.87351	3.60396e-06	0.000392705
RAB43	0.109732	3.87933	3.6252e-06	0.000392781
ZXDB	0.0886658	3.26617	3.62574e-06	0.000392781
RNF185	0.0874669	4.9398	3.65505e-06	0.000394809
KCNJ2-AS1	0.148664	2.22008	3.68005e-06	0.00039636
NINJ2-AS1	0.121524	4.68789	3.72934e-06	0.000400512
TRBV13	0.231096	0.3588	3.83191e-06	0.000410345
TMPRSS4	-0.751018	-0.762535	3.87852e-06	0.000414146
TFR2	-0.241193	1.85614	3.93316e-06	0.000418022
TSEN34	0.109478	6.2904	3.93725e-06	0.000418022
SEPTIN10	-0.15869	1.92808	3.96573e-06	0.000419849
GALNT5	-0.260373	1.71926	4.0467e-06	0.000427208
FAM20B	-0.0976194	5.64274	4.15914e-06	0.000437041
CSGALNACT2-DT	0.116593	1.18793	4.1633e-06	0.000437041
RIOX1	0.0823722	4.45919	4.17635e-06	0.000437179
PKD1L3	-0.327438	0.321155	4.29594e-06	0.000448439
LINC02422	0.200829	1.91435	4.32037e-06	0.000449728
SYTL3	0.130906	5.75399	4.39373e-06	0.000456092
MFSD2B	-0.235436	3.34394	4.50468e-06	0.000466309
AHSP	-0.346409	3.95059	4.55831e-06	0.000470554
NUCB1	-0.179492	5.21235	4.59368e-06	0.000472062
TNRC18P3	-0.804205	-1.94145	4.60495e-06	0.000472062
SAP30L	0.0693435	6.10076	4.61092e-06	0.000472062
ANKRD35	-0.386778	-0.0918887	4.6866e-06	0.000478495
LINC02882	-0.737317	-1.77925	4.70841e-06	0.000479409
DEPDC1	-0.35939	-0.10326	4.82988e-06	0.000490437
MTFP1	0.138088	0.423866	4.97203e-06	0.0005035
PSMD6-AS2	0.119273	5.70276	4.99032e-06	0.000503981
MAML2	0.0985682	5.76698	5.04885e-06	0.000508514
H3P4	-0.364013	-1.1835	5.08206e-06	0.00051048
RBBP6	0.0860291	6.62489	5.10559e-06	0.000511464
SAYSD1	0.0883794	3.92576	5.14787e-06	0.000514318
ANKRD26P3	-0.733302	-1.35608	5.20435e-06	0.00051857
ZNF460	0.0888908	6.65994	5.21838e-06	0.000518582
SLA2	0.127539	4.77835	5.2531e-06	0.000520644
TTC9C	0.0750348	4.39405	5.31624e-06	0.000525504
ROGDI	-0.162101	3.96029	5.34338e-06	0.00052679
GOLM1	-0.157025	2.8204	5.39291e-06	0.00053027
ABHD4	0.112528	4.5189	5.42795e-06	0.000531755
CHST11	0.107297	7.55979	5.43655e-06	0.000531755
CMAS	-0.144412	4.18969	5.57278e-06	0.000543097
TANC2	0.110091	5.67841	5.58166e-06	0.000543097
CKB	-0.195575	1.1955	5.71278e-06	0.000553006
PARD3	-0.228277	2.00198	5.71318e-06	0.000553006
ANKRD9	-0.242289	4.09746	5.82963e-06	0.000562816
TRIM27	0.0869564	6.67898	5.8597e-06	0.000564257
HTRA2	0.0765102	4.78484	5.91833e-06	0.000566822
CSGALNACT1	0.143879	5.63513	5.93014e-06	0.000566822
CLSPN	-0.202174	1.50502	5.93197e-06	0.000566822
UBE2H	-0.157557	7.87277	6.01991e-06	0.000572764
CAMSAP3	-0.771226	-0.813551	6.02489e-06	0.000572764
UBQLNL	0.207695	-0.418262	6.08938e-06	0.000576367
SDSL	-0.216943	0.917628	6.10037e-06	0.000576367
TMEM63B	-0.244802	5.04782	6.10919e-06	0.000576367
KIAA2013	0.0995199	5.37762	6.16299e-06	0.000579975
PRKCH	0.103262	7.90223	6.20693e-06	0.000582638
AGGF1P10	-0.673904	-1.75163	6.23207e-06	0.000583529
GBP6	0.281984	1.13813	6.27883e-06	0.000586433
SLC1A5	-0.235868	5.67689	6.51269e-06	0.000606754
ARSG	0.115096	6.01528	6.56056e-06	0.00060969
GGT5	-0.414431	0.0594496	6.67052e-06	0.000618262
PROK2	0.1839	6.67204	6.68598e-06	0.000618262
XPC-AS1	0.134006	4.89132	6.71288e-06	0.000619214
TRAV3	0.171091	0.820441	6.7646e-06	0.000622444
ALDH5A1	-0.178865	4.7438	6.79905e-06	0.000624073
FBXW5	0.0982261	5.98797	6.94717e-06	0.000636101
THBD	0.174124	5.01711	7.00504e-06	0.000638959
RNU1-28P	-0.770259	1.05768	7.01268e-06	0.000638959
LINC02915	-0.251611	2.09343	7.14283e-06	0.000647875
KLRC2	0.375545	2.70105	7.14529e-06	0.000647875
NCR1	0.174015	3.51866	7.22953e-06	0.000653922
MCTP2	0.126024	8.49784	7.26507e-06	0.000655545
ZNF688	0.0902766	3.678	7.32077e-06	0.000658976
PTGER4	0.0986745	6.2234	7.35371e-06	0.000660345
PSD3	-0.236103	2.32266	7.40053e-06	0.000662952
GZMM	0.149695	5.25089	7.45729e-06	0.000666435
MSLN	-0.798452	-0.956612	7.52296e-06	0.000668736
NFIB	-0.444331	0.662482	7.53036e-06	0.000668736
CENPF	-0.205661	2.61543	7.53688e-06	0.000668736
PTGFRN	-0.245132	1.30797	7.56274e-06	0.000669437
HCP5	0.0983232	7.16956	7.58179e-06	0.000669494
C9orf40	-0.151215	3.20427	7.6087e-06	0.000669494
HTR1F	-0.397284	-1.49585	7.61727e-06	0.000669494
TRIM72	-0.60786	-0.371363	7.69192e-06	0.000674464
SPOCK3	-0.463744	-0.991817	7.77305e-06	0.000678081
ABCC4	-0.160181	5.63865	7.78073e-06	0.000678081
SEMA6B	-0.375319	0.426685	7.78776e-06	0.000678081
SEPHS2	0.0970696	4.36423	7.89317e-06	0.000684534
TSPAN5	-0.2174	7.14592	7.90933e-06	0.000684534
ANKRD18DP	-0.297899	0.383677	7.91698e-06	0.000684534
GCNT2	-0.119067	4.13745	7.96195e-06	0.000686829
MAPK14	0.116949	8.74779	8.01208e-06	0.000689557
GLRX5P1	-0.475915	-2.39825	8.06074e-06	0.000692146
TNFAIP1	0.0870688	3.86716	8.11878e-06	0.000693945
PIP4K2A	-0.169059	8.97393	8.13486e-06	0.000693945
TSPO2	-0.281107	1.23358	8.13756e-06	0.000693945
FHL2	-0.263109	1.01904	8.18588e-06	0.000696473
BSG	-0.237043	9.13507	8.37021e-06	0.000710533
RNF10	-0.222047	8.5671	8.408e-06	0.000710951
CCL4	0.174849	4.02777	8.41328e-06	0.000710951
ENTPD4	0.0778631	7.24062	8.52006e-06	0.000718345
IL31RA	-0.304085	0.929209	8.55671e-06	0.000719807
TSPAN4	-0.1438	2.62054	8.61329e-06	0.000722935
FAT1	-0.385162	1.56601	8.63557e-06	0.000723176
ITPRIP	0.122572	6.90577	8.76057e-06	0.000731999
NTN3	-0.751821	-1.59285	8.86132e-06	0.00073876
ORAI3	0.0919117	4.6094	8.92752e-06	0.000742618
CNIH4	0.10295	5.47001	8.95978e-06	0.000743642
ZNF311	-0.268241	-0.273029	9.00966e-06	0.000745036
KRT8P33	0.140268	3.41255	9.01657e-06	0.000745036
DENND2C	-0.180861	2.07376	9.23906e-06	0.000761732
ROPN1L	0.130075	3.93779	9.39031e-06	0.000770437
PLCH1	-0.328687	0.645362	9.39144e-06	0.000770437
ANKRD36B	0.155366	5.58573	9.41804e-06	0.000770437
CASC15	-0.447636	0.98096	9.42734e-06	0.000770437
RGS6	-0.236001	2.79601	9.46768e-06	0.000772041
SYT15	-0.629865	-0.847487	9.58843e-06	0.000778675
SOX6	-0.220301	4.95143	9.59083e-06	0.000778675
RNF130	0.0962688	7.82262	9.66026e-06	0.000782607
MXD1	0.124338	9.84525	9.70693e-06	0.000784682
A4GALT	-0.555843	-0.764177	9.80062e-06	0.000788947
CD274	0.240205	4.55763	9.80203e-06	0.000788947
KNDC1	-0.434144	1.17363	9.8775e-06	0.000793308
VAV3	0.0980878	6.60744	9.93791e-06	0.000796444
RNU1-61P	-0.386921	-1.7633	9.98004e-06	0.000796617
PINLYP	-0.346669	-0.185566	9.98283e-06	0.000796617
SOX4	-0.116505	3.03849	1.01495e-05	0.00080793
NDUFV2-AS1	0.0823936	2.87799	1.0168e-05	0.00080793
ABHD15	0.0841277	4.40514	1.01951e-05	0.000808366
PTPRQ	-0.785669	-0.790877	1.03038e-05	0.000815247
H4C12	0.205451	4.37925	1.036e-05	0.000817957
RNU6-5P	0.122299	3.53953	1.04129e-05	0.000820394
ZNF556	-0.488656	-0.559292	1.04382e-05	0.000820654
AQP1	-0.253713	1.59916	1.0492e-05	0.00082315
HCCS-DT	-0.151574	1.22617	1.05265e-05	0.000824118
DYRK3	-0.239354	2.4021	1.05619e-05	0.000825153
MSRB1	0.1196	6.92093	1.08029e-05	0.000842216
FBXL13	0.18356	4.87767	1.08803e-05	0.000846481
GCLC	-0.120285	5.5401	1.10825e-05	0.000859559
CASKIN1	-0.816883	-0.351633	1.10945e-05	0.000859559
RNU6-767P	0.157476	-0.602625	1.12405e-05	0.000869065
TUSC3	-0.627657	-1.03907	1.12675e-05	0.000869349
FAM157B	0.192136	4.66497	1.13055e-05	0.000870479
TEX14BP	-0.62815	-1.21692	1.13386e-05	0.000871227
HERPUD2	0.0746012	6.27034	1.14513e-05	0.000878072
LRRC34	-0.194369	0.566521	1.14769e-05	0.000878229
TRABD-AS1	0.123396	2.79632	1.15925e-05	0.000883857
POMK	0.0771131	4.28641	1.16044e-05	0.000883857
HDGF	-0.189083	7.67816	1.16216e-05	0.000883857
LEMD2	0.0667895	6.47702	1.17419e-05	0.000889412
HROB	-0.363891	-0.755873	1.17525e-05	0.000889412
ZNF408	0.0648795	3.21469	1.17671e-05	0.000889412
SYCE1	-0.620302	-0.43626	1.17901e-05	0.000889412
PRKCQ	0.0972615	5.78149	1.18657e-05	0.000893308
PYHIN1	0.141257	5.80435	1.19187e-05	0.00089539
GSTK1	0.091931	6.57709	1.19414e-05	0.00089539
CENPE	-0.234148	2.21375	1.2016e-05	0.000899171
ADAMTS5	-0.198385	2.06448	1.20627e-05	0.000900858
EDIL3	-0.524278	-0.00988914	1.21754e-05	0.000907458
PKD1P5	-0.452961	1.58734	1.22848e-05	0.000913781
HACD4	0.109973	7.14237	1.23491e-05	0.000915798
C19orf25	0.0935355	4.92488	1.23728e-05	0.000915798
FAM227A	-0.664179	-0.411043	1.23856e-05	0.000915798
LMLN-AS1	-0.441124	-1.71677	1.24468e-05	0.000918499
ATP2B1-AS1	0.127933	3.8107	1.24865e-05	0.000919609
ZNF473	0.0711716	3.45264	1.27314e-05	0.000934197
UPK3A	-0.181803	0.484547	1.27363e-05	0.000934197
AREG	0.391413	-0.225638	1.27598e-05	0.000934197
IGKV1-17	0.370739	-0.0779046	1.28249e-05	0.000937125
FYN	0.101503	8.05799	1.28954e-05	0.000940432
DNAJC6	-0.258469	4.05393	1.31353e-05	0.000956054
MALRD1	-0.630684	-0.492587	1.31878e-05	0.000958005
DST	-0.131192	5.14647	1.33189e-05	0.000965201
NPR3	-0.394343	0.480768	1.33387e-05	0.000965201
ARID5B	0.0994887	6.21978	1.34806e-05	0.000972899
LINC01816	0.156216	-0.19797	1.34973e-05	0.000972899
CDK13	0.0679307	7.9813	1.3604e-05	0.000978703
TSPAN7	-0.33089	-0.760287	1.37113e-05	0.000984519
NAIPP2	0.17514	3.65947	1.3816e-05	0.00098894
NKX2-6	-0.815948	-2.07747	1.3832e-05	0.00098894
RBM14-RBM4	0.0984148	3.35031	1.38525e-05	0.00098894
NAXE	0.083099	3.19725	1.39014e-05	0.000990088
PXT1	-0.427348	-1.66398	1.39334e-05	0.000990088
SIGMAR1	0.0787154	3.56293	1.39516e-05	0.000990088
H2BC20P	0.108146	5.80376	1.39748e-05	0.000990088
GGN	-0.751305	-1.39596	1.40502e-05	0.000993025
KDM6A	0.0840323	6.80438	1.40956e-05	0.000993025
RNF14	-0.147371	6.41409	1.40988e-05	0.000993025
BLOC1S4	0.0907425	4.48893	1.41229e-05	0.000993025
ZNF324	0.0783307	4.37865	1.41977e-05	0.000996409
ADAMTS4	-0.237896	0.978835	1.42482e-05	0.000998072
MAPKAPK5	0.0657823	5.77034	1.43116e-05	0.00100033
STAT4	0.113657	6.59241	1.43341e-05	0.00100033
FUT10	0.196557	3.32728	1.44013e-05	0.00100314
ACOT11	-0.263064	1.93074	1.46994e-05	0.00102199
COL3A1	-0.769382	-1.23124	1.4912e-05	0.00103485
MYH10	-0.323541	1.23211	1.49696e-05	0.00103691
CELF2	0.0930133	9.12722	1.50369e-05	0.00103769
PUS1-AS1	-0.534742	-2.51332	1.50656e-05	0.00103769
SRSF2	0.0808905	6.74383	1.50672e-05	0.00103769
CSRNP1	0.12161	5.09038	1.50922e-05	0.00103769
ASB3	0.0635903	3.69998	1.51218e-05	0.00103781
POSTN	-0.779836	-1.62179	1.51699e-05	0.00103919
TYW1B	0.0861718	3.42655	1.52437e-05	0.00104233
SIGLEC15	-0.21819	0.866304	1.53394e-05	0.00104696
PRR35	-0.847792	-1.65851	1.54468e-05	0.00105236
OR10AA1P	0.165969	-0.152554	1.5543e-05	0.00105698
EFEMP1	-0.744863	-1.17999	1.56265e-05	0.00106073
LINC00528	0.110726	3.34959	1.56764e-05	0.00106217
RN7SKP296	0.154848	2.16452	1.57473e-05	0.00106505
HLA-F-AS1	0.130646	3.00217	1.58026e-05	0.00106609
ZFYVE27	0.0700667	6.14816	1.58201e-05	0.00106609
KLRC3	0.282938	2.22416	1.58779e-05	0.00106723
RAB2B	-0.196313	7.30808	1.59109e-05	0.00106723
RAB26	-0.771587	-1.724	1.59227e-05	0.00106723
LINC01320	-0.66336	-0.962835	1.59922e-05	0.00106898
CDC27P3	-0.237528	-0.381637	1.60253e-05	0.00106898
RIPOR3	-0.229905	1.97413	1.6035e-05	0.00106898
CERK	0.0771415	7.21709	1.61794e-05	0.00107668
ACKR2	-0.289565	0.440526	1.63916e-05	0.00108836
MTRFR	0.0665036	4.34485	1.64134e-05	0.00108836
DMTN	-0.270399	7.5508	1.64565e-05	0.00108928
DCN	-0.686582	-0.634899	1.66576e-05	0.00110064
PWWP2A	0.069278	6.03375	1.67955e-05	0.00110779
NUDT4	-0.153174	6.69648	1.68607e-05	0.00111013
FAM230E	-1.2719	-3.41248	1.70555e-05	0.0011196
KLRD1	0.18252	7.55443	1.70724e-05	0.0011196
MIR8075	0.33628	-1.99334	1.70947e-05	0.0011196
SPTBN4	-0.591712	0.752226	1.7129e-05	0.00111988
SLC25A21	-0.427975	-0.625173	1.7244e-05	0.00112542
SGO1	-0.197352	0.240113	1.73388e-05	0.00112963
RUNDC3A	-0.277509	4.64083	1.75117e-05	0.00113727
LYPD2	-0.292331	-0.0724404	1.75171e-05	0.00113727
TM2D3	0.0729135	5.86218	1.77541e-05	0.00114928
SNORD12B	0.122928	2.41528	1.77638e-05	0.00114928
NOL3	-0.173513	1.10523	1.80542e-05	0.00116581
SMIM5	-0.212193	4.50978	1.80819e-05	0.00116581
RAX2	-0.839313	-1.82334	1.82829e-05	0.00117673
MAST1	-0.713309	-0.385401	1.83243e-05	0.00117736
H1-4	0.142376	7.67084	1.83658e-05	0.00117736
ERV3-1	0.125461	6.79598	1.83986e-05	0.00117736
SPINK2	-0.245202	-0.407868	1.8419e-05	0.00117736
EMCN	-0.651722	-1.22026	1.85122e-05	0.00118129
PTPRH	-0.583862	-0.591966	1.8569e-05	0.00118289
HMOX2	0.0738563	5.027	1.86346e-05	0.00118358
IL1B	0.134047	5.22602	1.86433e-05	0.00118358
H1-0	-0.274288	4.87964	1.87111e-05	0.00118586
ADM	0.17749	5.29984	1.88574e-05	0.00119311
DDIT4	0.172867	5.38803	1.89719e-05	0.00119744
WDHD1	-0.130672	2.64931	1.89902e-05	0.00119744
DACT3	-0.706333	-0.718779	1.91457e-05	0.00120521
LINC00324	0.0925856	3.90534	1.93939e-05	0.00121878
LHX3	-0.722024	-0.885852	1.94378e-05	0.00121947
IRF2BPL	0.1232	5.47616	1.95038e-05	0.00122156
EGR2	-0.475184	-0.705159	1.9601e-05	0.00122559
MEIS1	-0.169909	2.97685	1.9683e-05	0.00122866
SCRT1	-0.827225	-1.65608	1.97394e-05	0.00123011
SEZ6L	-0.300807	1.30014	1.98061e-05	0.00123089
CLEC11A	-0.23496	1.00191	1.98178e-05	0.00123089
DCAF12	-0.235179	10.1233	1.98631e-05	0.00123165
USP39	0.0635464	5.23195	2.03497e-05	0.00125972
RBM20	-0.494073	0.177801	2.04414e-05	0.0012633
GLIS2	-0.646821	-1.12894	2.04972e-05	0.00126418
SNORD89	-0.431049	3.08484	2.05236e-05	0.00126418
EIF5AL1	-0.354604	-0.829122	2.05744e-05	0.00126522
CYP2W1	-0.802906	-1.43243	2.06476e-05	0.00126593
TPTE2P4	-0.779822	-2.40841	2.06539e-05	0.00126593
RAP2CP1	-0.872607	-2.35157	2.07548e-05	0.00126885
TPST1	0.202484	4.22324	2.07877e-05	0.00126885
SMTN	-0.379865	1.08229	2.08036e-05	0.00126885
LRRC10B	-0.801543	-1.82303	2.09757e-05	0.00127455
C22orf39	0.0630138	4.83281	2.0987e-05	0.00127455
PKP3	-0.672963	-0.959221	2.09997e-05	0.00127455
ZNF398	0.0721056	5.37753	2.10456e-05	0.00127526
LSM10	0.0947521	3.99188	2.1118e-05	0.00127757
SEC14L4	-0.246043	1.69161	2.13607e-05	0.00129016
RPL12P38	-0.670323	-2.06883	2.14281e-05	0.00129213
TP73	-0.645126	0.0249447	2.16908e-05	0.00130586
SYT15-AS1	-0.192059	0.426744	2.17601e-05	0.00130793
ARHGAP39	-0.62779	-0.348076	2.18593e-05	0.00130903
NRXN2	-0.518389	0.728317	2.18814e-05	0.00130903
VWA1	-0.767518	-0.978131	2.19206e-05	0.00130903
SORL1-AS1	0.131401	3.78218	2.19808e-05	0.00130903
CHTOP	0.0720298	6.80481	2.19867e-05	0.00130903
DKK3	-0.420749	0.29078	2.19894e-05	0.00130903
NOTUM	-0.812243	-1.24666	2.21868e-05	0.00131703
LINC02356	-0.252178	-1.24749	2.21944e-05	0.00131703
CBX3P2	0.158111	3.24275	2.22969e-05	0.00132101
ZNF264	0.0695068	6.67565	2.23511e-05	0.00132212
DOHH	-0.110142	2.74394	2.2492e-05	0.00132556
EIF3B	-0.100605	6.04279	2.2521e-05	0.00132556
LRRC37B	0.0942465	4.71138	2.2525e-05	0.00132556
CCL3	0.195079	1.58127	2.25515e-05	0.00132556
PGM2L1	-0.129534	4.44228	2.27007e-05	0.00133223
KCMF1	0.0683314	6.3544	2.28129e-05	0.00133671
SYS1	0.0776273	4.26692	2.30288e-05	0.00134582
P2RY6	-0.296739	0.265571	2.30804e-05	0.00134582
CBX3P10	0.141824	2.65447	2.31204e-05	0.00134582
XG	-0.325989	-0.681262	2.31224e-05	0.00134582
SLC34A3	-0.789301	-1.64026	2.31894e-05	0.00134582
PCNX1	0.0996486	9.13743	2.32172e-05	0.00134582
TBCC	0.0990356	5.87029	2.32212e-05	0.00134582
STK11	-0.129555	6.85917	2.32688e-05	0.00134648
BUB1B	-0.189647	1.03129	2.33486e-05	0.001349
HOXB2	0.164373	2.21763	2.3509e-05	0.00135617
PSENEN	0.107987	3.62009	2.4003e-05	0.00138153
C1orf232	-0.898471	-2.50526	2.40731e-05	0.00138153
XBP1	0.105185	6.50712	2.40852e-05	0.00138153
H2BC19P	0.107606	4.47338	2.41284e-05	0.00138153
RNF19B	0.112385	5.80851	2.4134e-05	0.00138153
SLC39A12	-0.712133	-1.52188	2.45342e-05	0.00140229
GK	0.132963	7.67943	2.48505e-05	0.00141466
ZNF174	0.0694819	3.14585	2.48553e-05	0.00141466
IDS	0.111333	7.1936	2.48815e-05	0.00141466
SMIM24	-0.305632	2.31329	2.49024e-05	0.00141466
GCGR	-0.823115	-1.41215	2.5189e-05	0.00142558
RANBP10	-0.194215	5.46765	2.52015e-05	0.00142558
PAGE2B	-0.300239	0.934836	2.52095e-05	0.00142558
NEDD4L	-0.162249	3.71475	2.52591e-05	0.00142622
APC2	-0.688602	0.397249	2.53272e-05	0.0014279
H1-6	0.145791	0.865945	2.54007e-05	0.00142988
LPP	0.0882782	7.79041	2.55527e-05	0.00143627
RNU1-148P	-0.727558	-2.48711	2.57117e-05	0.00144303
MPP1	-0.197805	8.53661	2.58129e-05	0.00144653
EXOC3L2	-0.618774	-0.717483	2.60023e-05	0.00145496
SLC17A7	-0.778608	-0.733648	2.61579e-05	0.00146147
THBS4	-0.206217	1.26564	2.62437e-05	0.00146407
ZBTB34	0.0966761	7.04446	2.64328e-05	0.00147241
INSR	-0.113163	4.24887	2.6556e-05	0.00147517
XK	-0.254162	6.1143	2.65614e-05	0.00147517
AUNIP	-0.422905	-1.36109	2.66938e-05	0.00148032
MTATP6P11	0.196949	0.829274	2.70486e-05	0.0014969
BAHCC1	-0.406335	1.43651	2.70733e-05	0.0014969
MAD2L1BP	0.0879855	3.75208	2.73142e-05	0.00150799
ANP32BP1	-0.5757	-1.86287	2.74161e-05	0.00150953
PNISR-AS1	0.0910268	2.78532	2.7486e-05	0.00150953
KLRC4-KLRK1	0.237491	3.1278	2.75145e-05	0.00150953
TAPT1-AS1	0.0856679	3.41005	2.75278e-05	0.00150953
WHAMM	0.0666361	5.11826	2.75906e-05	0.00150953
TSPYL4	0.0653247	4.05358	2.76158e-05	0.00150953
H2AC16	0.196823	2.98033	2.76256e-05	0.00150953
MEIS3	-0.776516	-1.17269	2.78297e-05	0.00151845
PKHD1L1	-0.21091	3.1314	2.78786e-05	0.0015189
ALOX15B	-0.310177	-0.383286	2.82169e-05	0.00153508
EXD1	-0.695605	-1.27894	2.8314e-05	0.00153812
APBB2	-0.411885	0.84847	2.83625e-05	0.00153851
SCGB3A1	-0.559992	-1.18754	2.86059e-05	0.00154946
MIR4654	-0.860924	-3.16019	2.86497e-05	0.00154958
CCS	-0.117442	5.06304	2.87741e-05	0.00155405
LITAF	0.123982	9.04159	2.88293e-05	0.00155414
MEG8	-0.512027	0.873675	2.88738e-05	0.00155414
HAGH	-0.204458	7.49141	2.89009e-05	0.00155414
TMEM179B	0.0934686	3.29292	2.90656e-05	0.00156075
CHRNA5	-0.322851	-0.0646918	2.91484e-05	0.00156191
TRBV6-5	0.194851	1.13412	2.91712e-05	0.00156191
CHILL1	0.148713	2.60803	2.92339e-05	0.00156252
C18orf32	0.0645447	3.60487	2.92664e-05	0.00156252
MIR4479	0.129945	0.0798568	2.94099e-05	0.00156794
CIMAP1D	-0.778272	-1.88932	2.9661e-05	0.00157907
CNRIP1	-0.350017	-0.886678	2.98225e-05	0.0015854
RFC5	0.0515258	3.42122	2.99327e-05	0.00158899
TINF2	0.0701811	6.16652	3.00446e-05	0.00159266
DPPA4	-0.263357	0.0774149	3.02899e-05	0.00160338
GCATP1	0.0953585	2.48881	3.03504e-05	0.00160431
MED11	0.0898119	4.02947	3.05839e-05	0.00161436
ING1	0.0692968	5.0701	3.0643e-05	0.00161519
MIR219A2HG	-0.802183	-1.85583	3.07613e-05	0.00161914
CENPBD2P	0.104379	3.65347	3.0826e-05	0.00162026
PEX6	0.109826	4.80025	3.09104e-05	0.00162241
SULT6B1	-0.786895	-2.28971	3.10418e-05	0.00162701
RNA5-8SN2	0.666365	-2.37947	3.1314e-05	0.00163897
ZFP36	0.133585	5.7548	3.15315e-05	0.00164804
LINC00544	0.136643	1.94535	3.17985e-05	0.00165967
SLC16A8	-0.769654	-1.61853	3.20412e-05	0.00166949
IGLV1-40	0.33684	1.01964	3.21175e-05	0.00166949
C1orf87	-0.622891	-0.805941	3.2121e-05	0.00166949
RYR1	-0.440729	1.84246	3.2335e-05	0.00167734
RBM22	0.0657831	4.98953	3.24638e-05	0.00167734
RPL19P6	0.118355	0.475761	3.24868e-05	0.00167734
PDE3A	-0.222784	1.74632	3.24924e-05	0.00167734
SEMA3F	-0.750573	-0.864305	3.24972e-05	0.00167734
C2orf68	0.0676171	6.07466	3.2674e-05	0.00168414
TREM2	-0.400812	-1.86904	3.27367e-05	0.00168503
HSPD1P4	-0.420407	-1.74935	3.29101e-05	0.00168904
TEKT2	-0.467849	-1.26322	3.29494e-05	0.00168904
CHID1	-0.0932578	4.08326	3.29504e-05	0.00168904
CILP2	-0.722738	-0.844339	3.31495e-05	0.00169535
ACP6	0.0972599	4.29762	3.31646e-05	0.00169535
IL17REL	-0.699831	-1.32454	3.33776e-05	0.00170198
SCML4	0.101469	6.01912	3.34071e-05	0.00170198
BABAM1	-0.1371	4.70395	3.34312e-05	0.00170198
BRD10	0.0758443	6.9963	3.36062e-05	0.00170855
FGFR3	-0.7382	-0.236806	3.37332e-05	0.00171267
ELOF1	-0.170902	4.3934	3.39264e-05	0.00171815
GSEC	0.141467	4.09136	3.39333e-05	0.00171815
DNAH2	-0.696716	0.702644	3.45582e-05	0.00174742
POC1B-AS1	0.0972627	5.13312	3.46947e-05	0.00174991
SLC17A5	0.0639388	4.35738	3.4735e-05	0.00174991
SLC12A5-AS1	-0.735569	-1.45696	3.47685e-05	0.00174991
PTGES3P1	0.146177	2.15445	3.48285e-05	0.00174991
CATSPERD	-0.616131	-1.17087	3.48423e-05	0.00174991
SNCA-AS1	-0.481089	-1.51428	3.51964e-05	0.00176531
ANKRD18B	-0.631228	-0.52424	3.53722e-05	0.00177175
FAM72A	-0.149438	0.182603	3.5551e-05	0.00177831
EOLA1	0.0666359	3.71134	3.57481e-05	0.00178557
NREP	-0.0870877	3.05939	3.57919e-05	0.00178557
SPARCL1	-0.644591	-1.35041	3.5854e-05	0.00178628
GSDMA	-0.427855	-0.799118	3.61339e-05	0.00179782
RNU6-638P	0.113009	2.99023	3.6197e-05	0.00179856
LINC01222	-0.472472	-2.2078	3.63675e-05	0.00180331
BMAL2	-0.211488	1.1926	3.63894e-05	0.00180331
PERM1	-0.728271	-0.979164	3.64678e-05	0.00180479
ARHGAP23	-0.554017	0.777761	3.66334e-05	0.00181059
FRAT2	0.120534	8.2694	3.67265e-05	0.00181278
DGUOK	0.0776051	4.16575	3.68807e-05	0.00181383
MTCYBP23	0.231155	2.21855	3.68857e-05	0.00181383
RAD51AP1	-0.184663	0.792601	3.68938e-05	0.00181383
CLPP	0.085474	3.18846	3.70602e-05	0.00181961
GET3	-0.117982	4.98513	3.75107e-05	0.00183657
ADCY6	-0.441866	0.573456	3.75207e-05	0.00183657
TRPM4	-0.380191	0.668308	3.75867e-05	0.00183657
FBXO44	0.107385	3.0521	3.76287e-05	0.00183657
CHGA	-0.759549	-1.32605	3.7652e-05	0.00183657
TDRD10	-0.711374	-1.44772	3.78595e-05	0.00184209
PRKAG2-AS2	-0.316078	-0.942254	3.7864e-05	0.00184209
ZXDC	0.0909601	6.63699	3.80584e-05	0.00184847
CSMD3	-0.784046	-0.561254	3.80943e-05	0.00184847
ALAD	-0.0823928	4.6677	3.86093e-05	0.00187102
RHCE	-0.234589	1.15651	3.86723e-05	0.00187164
PALM	-0.650694	-0.702453	3.88381e-05	0.00187723
RFTN2	-0.580489	-1.16124	3.91043e-05	0.00188765
CPE	-0.588565	-1.16608	3.91884e-05	0.00188793
TTLL10	-0.667278	-0.682035	3.92116e-05	0.00188793
PEAR1	-0.36303	0.927627	3.92954e-05	0.00188953
CD53	0.0756448	8.89546	3.9375e-05	0.00189091
TGM2	-0.238212	2.60914	3.95292e-05	0.00189588
AKIRIN2	0.089762	5.21076	3.96145e-05	0.00189752
CD209	-0.370106	-0.698906	3.98547e-05	0.00190658
ZDHHC13	0.0730736	5.13819	4.00874e-05	0.00191398
TMEM223	0.0908082	3.11367	4.02448e-05	0.00191398
ECI2	0.0676747	4.31724	4.02596e-05	0.00191398
FUT2	-0.801237	-2.13248	4.02661e-05	0.00191398
PTGFR	-0.360257	-0.297247	4.03002e-05	0.00191398
HCAR2	0.136975	4.68453	4.03382e-05	0.00191398
MIR7845	0.164129	2.46071	4.0369e-05	0.00191398
PTGIS	-0.706127	-1.16849	4.06229e-05	0.00192358
RIBC2	-0.466529	-1.15184	4.07748e-05	0.00192832
CNTD1	-0.686725	-1.66706	4.10657e-05	0.00193961
SLAIN1	0.0868898	4.4652	4.11653e-05	0.00194186
STUM	-0.706017	-0.8835	4.1266e-05	0.00194415
CCDC142	0.0757788	5.36644	4.1379e-05	0.00194701
PPP1R14BP3	0.169165	2.82762	4.2037e-05	0.00197547
RFFL	0.090844	6.62815	4.21549e-05	0.00197852
MTND3P12	0.193014	1.4718	4.22541e-05	0.00198068
MIR181A2HG	0.203022	1.34988	4.23761e-05	0.0019839
CDCA7	-0.167753	1.36695	4.25099e-05	0.00198767
CES1P1	-0.517876	-0.683344	4.25936e-05	0.00198811
LONRF3	0.0862258	3.87549	4.26455e-05	0.00198811
LINC01278	0.0918847	2.72158	4.26792e-05	0.00198811
HAS1	-0.703345	-1.22245	4.29439e-05	0.00199656
ADORA1	-0.536922	-0.413047	4.29678e-05	0.00199656
ZNF334	-0.371126	-0.02355	4.32693e-05	0.00200806
CAPN10-DT	0.0719252	3.61381	4.34189e-05	0.00201224
CD163L1	-0.372736	0.808427	4.34674e-05	0.00201224
IRGC	-0.8262	-2.29533	4.36499e-05	0.00201818
SLC12A6	0.0967843	8.62715	4.37203e-05	0.00201893
SH2D1B	0.187291	4.06611	4.38165e-05	0.00201971
KLC3	-0.263475	3.78741	4.38455e-05	0.00201971
PPP1R3B	0.114446	7.39056	4.39422e-05	0.00201991
CSNK1A1	0.0772652	6.83363	4.39581e-05	0.00201991
SLC2A4	-0.408008	-0.784951	4.4143e-05	0.0020259
CCDC187	-0.630983	0.460771	4.42947e-05	0.00202984
DUSP2	0.180275	3.57855	4.4386e-05	0.00202984
GPR27	0.135599	4.3123	4.43921e-05	0.00202984
RMST	-0.57343	-1.08516	4.45072e-05	0.0020326
MSANTD2	0.0704242	4.49005	4.47069e-05	0.00203922
FDXR	-0.127032	1.96172	4.4815e-05	0.00204166
CREB5	0.143325	7.911	4.50753e-05	0.00204735
ELAVL3	-0.746748	-1.16814	4.50797e-05	0.00204735
WASH4P	-0.174914	-0.682742	4.51047e-05	0.00204735
SGCZ	-0.800566	-2.3586	4.52259e-05	0.00205035
UBXN6	-0.208258	8.33451	4.53538e-05	0.00205323
PIPOX	0.0735837	2.97903	4.53995e-05	0.00205323
WNK2	-0.586298	0.674327	4.54882e-05	0.00205474
STUB1	0.0782953	4.29224	4.55849e-05	0.00205569
PPP1R15B	0.0798511	7.49348	4.56196e-05	0.00205569
PSORS1C1	-0.769542	-0.954552	4.58829e-05	0.00206506
TBC1D8-AS1	-0.245505	-0.60719	4.61719e-05	0.0020716
NLN	-0.112729	3.43536	4.61829e-05	0.0020716
RHAG	-0.225477	2.2492	4.61948e-05	0.0020716
HADHAP2	-0.369617	-1.33177	4.62851e-05	0.00207315
ANO7L1	-0.301377	0.216786	4.64003e-05	0.00207581
MEG3	-0.50502	1.90848	4.64799e-05	0.00207688
TSC22D3	0.124397	7.57132	4.66157e-05	0.00208045
MAD2L2	0.0758138	3.39062	4.66892e-05	0.00208124
ABCB5	-0.518994	-0.263211	4.6877e-05	0.00208712
PLGLA	-0.434173	-1.54425	4.69957e-05	0.00208928
RAF1	0.0906206	8.11905	4.70378e-05	0.00208928
SEPTIN7P14	0.102576	5.69813	4.73178e-05	0.0020961
GRIN1	-0.749706	-0.384775	4.73418e-05	0.0020961
TNFSF14	0.0999881	6.29198	4.73601e-05	0.0020961
FBXL14	0.074531	3.90435	4.7556e-05	0.00210228
DUSP5P2	-0.831962	-2.567	4.78077e-05	0.00211017
ZNF730	-0.347623	-1.26396	4.78674e-05	0.00211017
GID4	-0.123984	4.31992	4.79043e-05	0.00211017
CADPS2	-0.712267	-0.912871	4.805e-05	0.00211409
TXNDC12	0.0928878	3.9972	4.84028e-05	0.0021271
TNPO1P1	0.124261	2.86247	4.87647e-05	0.00214048
YBX2	-0.737751	-1.36993	4.89815e-05	0.00214746
PPM1F-AS1	-0.267309	2.39479	4.91859e-05	0.00215389
MTCO3P11	0.139168	2.58082	4.95019e-05	0.00216519
HHIP-AS1	-0.518675	-1.80893	4.99604e-05	0.00218268
SBK2	-0.791483	-1.8297	5.04117e-05	0.00219982
ITSN1	-0.12861	4.12964	5.05491e-05	0.00220098
ZNF101P1	-0.775686	-2.48368	5.05566e-05	0.00220098
ANKRD30BL	-0.612439	-1.08359	5.06171e-05	0.00220105
SAMD11	-0.722096	-0.217942	5.08927e-05	0.00221045
PCED1A	0.0845704	4.39992	5.12713e-05	0.0022243
FRMD4A	-0.274621	2.68635	5.13885e-05	0.00222431
DHRS9	0.173389	5.20002	5.13909e-05	0.00222431
RNU6-1 /// RNU6-50P	0.150505	1.43469	5.15974e-05	0.00223036
TBC1D12	-0.120172	3.39827	5.16503e-05	0.00223036
KCNJ4	-0.660337	-1.68085	5.19288e-05	0.00223979
PALM3	-0.819443	-1.35553	5.23865e-05	0.00225692
TMEM106C	0.0779617	3.44063	5.25144e-05	0.00225982
TESK2	0.0776591	3.98711	5.28876e-05	0.00227325
RASIP1	-0.674923	-0.76866	5.29727e-05	0.00227428
C1QTNF4	-0.592157	-1.33949	5.30902e-05	0.00227671
TILAM	-0.813089	-1.95017	5.3195e-05	0.00227858
MIR1262	0.228536	-0.136269	5.35142e-05	0.00228962
GRAMD2B	0.0864247	2.46674	5.36614e-05	0.00229328
LRRC8E	-0.776861	-1.53384	5.40355e-05	0.00230663
ZNF653	-0.101597	2.15553	5.43153e-05	0.00231592
SNX8	-0.116647	3.10438	5.48789e-05	0.00233727
LATS2	0.0833045	4.59177	5.49806e-05	0.00233894
AMPD1	-0.672904	-1.815	5.51049e-05	0.00234037
MYO15A	-0.495178	1.16844	5.51973e-05	0.00234037
IL17RE	-0.333493	-0.0572368	5.52857e-05	0.00234037
IZUMO1	-0.758383	-1.36545	5.52908e-05	0.00234037
ST13P4	-0.46078	-1.88659	5.53284e-05	0.00234037
PDCD1LG2	0.251101	0.566125	5.55928e-05	0.00234889
FBXO47	-0.582466	-2.10391	5.56583e-05	0.00234899
NPC1	0.104113	5.93814	5.57887e-05	0.00235183
NPAS1	-0.699234	-1.15989	5.58989e-05	0.00235372
P4HTM	0.0789081	4.50673	5.59598e-05	0.00235372
MISP	-0.821378	-1.96362	5.60976e-05	0.00235686
SNX32	-0.42934	-1.01972	5.6295e-05	0.00236249
MIR3134	0.174622	-0.994654	5.64962e-05	0.00236827
PDE6D	0.0609684	4.25047	5.66676e-05	0.00237072
TYRO3	-0.65085	0.119818	5.67322e-05	0.00237072
PIGH	0.0691315	3.65013	5.67457e-05	0.00237072
MIR3648-1	0.321188	4.68302	5.68437e-05	0.00237216
SMC1B	-0.587244	-0.401758	5.70659e-05	0.0023772
IP6K2	0.0618142	5.4475	5.71391e-05	0.0023772
GPRC5D-AS1	0.332509	1.12925	5.7156e-05	0.0023772
ACTG1P20	0.099632	1.67124	5.72664e-05	0.00237914
SPCS3-AS1	0.0962788	1.8816	5.75634e-05	0.00238711
PLPP2	-0.600044	-0.215654	5.75862e-05	0.00238711
PPP2R2D	0.066894	6.15677	5.77904e-05	0.00238992
IL4I1	-0.244655	-0.00986316	5.77914e-05	0.00238992
GUCY1A2	-0.627973	-0.68837	5.78464e-05	0.00238992
MRGPRF	-0.723826	-1.66206	5.8518e-05	0.00241499
SLC52A1	-0.647552	-1.70889	5.86977e-05	0.00241929
LINC02898	-0.638435	-0.994287	5.87575e-05	0.00241929
ZNF250	0.0536893	3.85775	5.8817e-05	0.00241929
PLEK2	-0.219363	4.12708	5.90806e-05	0.00242745
RUNX1T1	-0.63724	-0.19788	5.93963e-05	0.00243547
SYT5	-0.725092	-0.869158	5.94064e-05	0.00243547
IL12RB2	0.173186	2.60593	5.96115e-05	0.00243908
GUCY1B2	-0.520687	-0.00605774	5.96256e-05	0.00243908
ARHGAP29	-0.245209	1.57206	5.97465e-05	0.00243957
ZG16	-0.873287	-2.34673	5.98176e-05	0.00243957
RNU6-838P	0.153396	1.88741	5.98337e-05	0.00243957
ICAM4	-0.16359	2.92219	6.01753e-05	0.00244675
LCP2	0.0812591	8.45974	6.01848e-05	0.00244675
PDP2	0.0649211	3.38081	6.02739e-05	0.00244675
TDP1	0.0605469	5.04197	6.02822e-05	0.00244675
RASL10A	-0.453026	-0.437722	6.03837e-05	0.00244675
MILIP	-0.69501	-2.14052	6.05712e-05	0.00244675
NMRK2	-0.799526	-2.17997	6.05933e-05	0.00244675
GJC2	-0.156209	0.773957	6.0626e-05	0.00244675
SSC5D	-0.635125	-0.373094	6.0697e-05	0.00244675
DUX4L19	-0.672756	0.609096	6.06988e-05	0.00244675
HAPSTR1	0.078932	8.4684	6.07322e-05	0.00244675
SEZ6L2	-0.78494	-1.44434	6.08923e-05	0.00245055
CGN	-0.564972	-0.178688	6.11942e-05	0.00245894
TAL1	-0.182624	5.86755	6.12812e-05	0.00245894
SOWAHC	-0.142015	1.97149	6.13574e-05	0.00245894
NPR1	-0.747352	-1.12463	6.13647e-05	0.00245894
GPR4	-0.810122	-2.30238	6.14781e-05	0.00245995
MIR3175	0.100109	1.09609	6.15397e-05	0.00245995
TRAV27	0.169094	0.801502	6.15879e-05	0.00245995
MTHFSD	0.0539548	4.42226	6.17255e-05	0.00246228
FUT3	-0.747225	-1.3859	6.18348e-05	0.00246228
IRF2-DT	0.0996532	4.35551	6.18482e-05	0.00246228
LINC03002	-0.662845	-1.79613	6.19104e-05	0.00246228
MRPL49	0.0632656	4.64006	6.21652e-05	0.00246331
SLC7A6OS	0.0593038	5.54605	6.2279e-05	0.00246331
SPMAP2L	-0.326126	-0.569834	6.22924e-05	0.00246331
RTBDN	-0.841694	-2.11268	6.23245e-05	0.00246331
CARD9	-0.116118	4.63795	6.23396e-05	0.00246331
MT-RNR2	0.446802	6.25009	6.23549e-05	0.00246331
RFPL1S	-0.270611	-0.115777	6.23991e-05	0.00246331
MIR6813	0.131243	0.414991	6.33481e-05	0.00249813
MLXIPL	-0.730696	-1.0379	6.35024e-05	0.0024993
SRMS	-0.615848	-1.36409	6.35717e-05	0.0024993
COMMD5	0.0597942	4.33973	6.3579e-05	0.0024993
RPL7P8	-0.617767	-2.83334	6.40026e-05	0.0025117
RBBP8NL	-0.731494	-1.3727	6.4186e-05	0.0025117
TLCD3B	-0.737244	-1.41173	6.42007e-05	0.0025117
PRRT1B	-0.770032	-2.02192	6.42284e-05	0.0025117
SON	0.068293	9.00093	6.42314e-05	0.0025117
CARD14	-0.643382	-0.132561	6.44053e-05	0.00251586
DYTN	-0.228048	0.389743	6.4589e-05	0.00252039
GFUS	-0.185765	4.83335	6.5177e-05	0.00254068
EGF	-0.197887	2.77361	6.5299e-05	0.00254277
PHLPP1	0.085315	4.34706	6.59426e-05	0.00256484
MKRN2	0.0599192	4.73758	6.60034e-05	0.00256484
VASN	-0.630783	-1.47385	6.61557e-05	0.0025675
PLEKHH3	-0.556139	-0.368315	6.62095e-05	0.0025675
IAH1	0.0584645	4.63253	6.64654e-05	0.00257474
RPLP0P2	-0.638858	-1.63746	6.66846e-05	0.00257882
GFAP	-0.677108	-0.125506	6.68651e-05	0.00257882
SHLD2P3	-0.234065	-0.582039	6.69097e-05	0.00257882
ZNF442	-0.166122	1.69742	6.6928e-05	0.00257882
KCNN1	-0.753847	-1.25234	6.69315e-05	0.00257882
CECR2	-0.444586	0.531959	6.70593e-05	0.00257882
HFM1	-0.488548	-0.124181	6.71152e-05	0.00257882
ALG12	0.0881729	3.87955	6.71243e-05	0.00257882
SOAT2	-0.422602	-1.04758	6.80619e-05	0.00261119
GYPA	-0.267423	3.48808	6.8107e-05	0.00261119
CASK	0.0811928	5.69841	6.82088e-05	0.0026124
NHERF2	-0.504658	-0.581452	6.8343e-05	0.00261432
TRIM63	-0.719898	-1.62237	6.8399e-05	0.00261432
ZSCAN2-AS1	0.0749829	2.25389	6.84992e-05	0.00261439
DNAH14	-0.456463	1.21073	6.85412e-05	0.00261439
PPFIA4	-0.287261	1.63183	6.87169e-05	0.00261841
SVBP	-0.144587	3.80175	6.88239e-05	0.00261981
SPECC1-DT	-0.609547	-2.01616	6.90432e-05	0.00262547
DIRAS1	-0.417665	-0.919758	6.91928e-05	0.00262814
CSMD1	-0.488657	1.29646	6.92544e-05	0.00262814
MSL2	0.0654305	7.28971	6.94402e-05	0.00263251
TTLL8	-0.684963	-1.10624	6.97812e-05	0.00264275
PPP4R1-AS1	0.140746	0.847624	6.9973e-05	0.00264732
ASPA	-0.71002	-1.14002	7.00977e-05	0.00264935
CBARP	-0.761282	-0.979431	7.03944e-05	0.00265787
GAD1	-0.568209	-0.141996	7.06768e-05	0.00266583
CHTF8	0.0806959	5.31835	7.08271e-05	0.0026688
ZNF337	0.0746433	5.30837	7.0929e-05	0.00266994
SLC6A4	-0.288168	0.863584	7.10738e-05	0.00267269
DLGAP5	-0.268407	1.02829	7.1169e-05	0.00267357
CLCA3P	-0.762357	-2.11779	7.12526e-05	0.00267402
EPHA10	-0.680661	0.129607	7.15046e-05	0.00268077
RHBDF1	-0.603317	-0.607367	7.16297e-05	0.00268277
CIROP	-0.709862	-1.75298	7.20414e-05	0.00269548
CPA3	0.299835	2.41902	7.22301e-05	0.0026997
PDE4DIP	0.0711261	5.27866	7.23191e-05	0.0026997
ARL11	0.0904612	6.03892	7.23716e-05	0.0026997
PPL	-0.509818	0.168641	7.30268e-05	0.00272039
FOXA1	-0.733242	-1.54952	7.30722e-05	0.00272039
DNAAF1	-0.68769	-0.515708	7.34749e-05	0.00273135
RNU1-19P	-0.511749	-0.92446	7.35132e-05	0.00273135
ANLN	-0.208131	1.28003	7.40746e-05	0.00274847
STRADB	-0.216265	9.41452	7.41215e-05	0.00274847
OLFM3	-0.710831	-2.02531	7.48446e-05	0.00277252
ST20	0.121642	4.93081	7.51503e-05	0.00278108
GAS2L3	-0.150212	1.61054	7.53854e-05	0.00278702
PRR29	-0.418463	-0.63156	7.54837e-05	0.00278789
DIAPH3	-0.254505	1.05036	7.5717e-05	0.00279144
FMOD	0.663243	-0.693061	7.58454e-05	0.00279144
IL11	-0.734052	-1.7159	7.59008e-05	0.00279144
MIOX	-0.648304	-1.98238	7.60432e-05	0.00279144
APOE	-0.575776	-1.41719	7.61996e-05	0.00279144
TFRC	-0.133814	6.65582	7.62526e-05	0.00279144
CMTM1	0.110374	2.66952	7.62545e-05	0.00279144
SYDE1	-0.690563	-1.13785	7.63193e-05	0.00279144
PROX1	-0.5311	-0.367716	7.63562e-05	0.00279144
CFAP74	-0.704642	-0.0218502	7.63834e-05	0.00279144
NECAP1	0.0642279	5.99061	7.64339e-05	0.00279144
UBE4A	0.0751044	7.13045	7.65426e-05	0.00279144
MXI1	-0.190584	7.96952	7.65537e-05	0.00279144
TLE6	-0.57877	-0.988746	7.67104e-05	0.00279442
CCDC169	-0.572199	-0.741503	7.69693e-05	0.00280111
TLK2	0.0601268	6.44836	7.71069e-05	0.00280338
MTMR7	-0.56587	-0.325961	7.72111e-05	0.00280443
UNC13A	-0.566254	0.421766	7.80298e-05	0.00282109
EMICERI	-0.523406	-0.449159	7.80323e-05	0.00282109
HDAC11	-0.113774	2.27517	7.82834e-05	0.00282109
AURKA	-0.162489	2.19174	7.83294e-05	0.00282109
NAALADL2	-0.315897	0.155333	7.83457e-05	0.00282109
CA5A	-0.715655	-0.555993	7.84016e-05	0.00282109
SNX19	0.0749682	6.9029	7.84078e-05	0.00282109
TXNDC11	0.0724108	4.90111	7.84115e-05	0.00282109
SPACA6-AS1	-0.70732	-1.39136	7.85222e-05	0.00282109
EPHB3	-0.428237	-0.193247	7.85335e-05	0.00282109
FOXO3	-0.144473	8.53543	7.854e-05	0.00282109
STN1	0.0811705	5.42107	7.85781e-05	0.00282109
HSPA12B	-0.644674	-0.599492	7.86855e-05	0.00282223
APLP1	-0.754238	-1.07765	7.8892e-05	0.00282691
TTBK1	-0.69634	-0.070565	7.9191e-05	0.0028349
JMJD4P1	-0.768684	-2.3418	7.95626e-05	0.00284373
GNPTAB	0.0844992	6.48481	7.95903e-05	0.00284373
MIPOL1	-0.474435	0.0819242	7.97345e-05	0.00284513
KLHDC8A	-0.303841	0.104472	7.97822e-05	0.00284513
MEIOC	-0.621577	-0.833034	8.01352e-05	0.00284996
LINC01979	-0.678013	-0.785234	8.02432e-05	0.00284996
SPO11	-0.735511	-1.89466	8.02919e-05	0.00284996
PCDHB16	-0.741731	-1.91578	8.02997e-05	0.00284996
NAPSA	-0.238979	0.309883	8.02999e-05	0.00284996
SLC22A16	-0.17193	1.9441	8.06081e-05	0.00285817
PLCD3	-0.38858	0.128773	8.10108e-05	0.00286948
PTH2R	-0.167385	1.01029	8.11831e-05	0.00286948
RELA-DT	0.101974	2.26897	8.12279e-05	0.00286948
CTSV	-0.564066	-0.744527	8.12351e-05	0.00286948
TM4SF1	-0.408615	-1.0658	8.1323e-05	0.00286987
HSD17B6	-0.326648	-0.518923	8.1602e-05	0.00287699
KRT18P31	0.0934633	5.30598	8.20461e-05	0.00288991
FRG1GP	-0.325063	-0.824215	8.2227e-05	0.00289355
FUT1	-0.563267	-1.24375	8.25304e-05	0.00289954
L3HYPDH	0.0849729	4.35028	8.26089e-05	0.00289954
HOXA13	-0.708712	-1.37121	8.26306e-05	0.00289954
COLEC12	-0.444633	-0.191084	8.29683e-05	0.00290672
ABHD3	0.095108	6.8019	8.29911e-05	0.00290672
NMRK1	0.112182	5.12264	8.3168e-05	0.00291018
MROH7	-0.437245	-0.472559	8.36512e-05	0.00292434
TNFRSF4	0.150478	2.08001	8.37718e-05	0.00292581
DYDC2	-0.753129	-2.12015	8.39055e-05	0.00292774
ADAM21	-0.560165	-1.57992	8.42425e-05	0.00293611
BCAM	-0.357243	0.638969	8.43031e-05	0.00293611
FAM185BP	0.10922	4.12383	8.45029e-05	0.00293995
PODNL1	-0.615357	-1.23277	8.4682e-05	0.00293995
VGF	-0.728929	-1.31748	8.47268e-05	0.00293995
ASPM	-0.193202	2.70001	8.47287e-05	0.00293995
MEIOB	-0.803504	-2.2841	8.50202e-05	0.00294731
CARM1	-0.212164	4.11826	8.52154e-05	0.00295133
CHRNB2	-0.718421	-1.21523	8.55065e-05	0.00295468
EXOC3L4	-0.656194	-0.648843	8.55277e-05	0.00295468
FXYD6-AS1	-0.215339	0.736303	8.55497e-05	0.00295468
SELPLG	0.109687	7.37044	8.58844e-05	0.00296349
TMEM145	-0.755448	-1.51469	8.59762e-05	0.00296391
TTC9B	-0.741474	-1.62869	8.60647e-05	0.00296422
TRIB1AL	-0.319681	-1.09754	8.61687e-05	0.00296506
ATP8B5P	-0.621455	-0.499276	8.62586e-05	0.00296542
SKAP1	0.105251	4.90841	8.65343e-05	0.00297215
COL11A1	-0.726325	-0.66189	8.75302e-05	0.00300221
CLMP	-0.485074	-0.74162	8.75704e-05	0.00300221
LINC02453	-0.16134	-0.278238	8.77129e-05	0.00300225
ZSCAN10	-0.703002	-1.69428	8.77328e-05	0.00300225
AMN1	0.0879959	4.44881	8.79827e-05	0.00300804
ZKSCAN3	0.0584158	3.90684	8.83541e-05	0.00301614
EPCAM	-0.482797	-1.01897	8.83814e-05	0.00301614
GPRIN2	-0.671164	-0.572302	8.86825e-05	0.0030222
PCDH15	-0.7233	-0.576784	8.87213e-05	0.0030222
CYP4F22	-0.322118	-0.180095	8.90755e-05	0.00303005
GPR88	-0.512029	-1.51513	8.91455e-05	0.00303005
ARPC5L	0.073095	4.48444	8.92885e-05	0.00303005
EHD2	-0.589346	-0.829271	8.93954e-05	0.00303005
ICAM4-AS1	-0.496838	-1.96188	8.94394e-05	0.00303005
FCAR	0.132877	5.37665	8.94446e-05	0.00303005
ZBTB8A	-0.375089	-0.77012	8.96552e-05	0.00303005
SOX18	-0.738977	-1.79571	8.96653e-05	0.00303005
PVALEF	-0.75686	-1.87499	8.96835e-05	0.00303005
MYADML2	-0.836002	-2.4139	9.00519e-05	0.00303492
SLC49A4	0.0914458	5.66305	9.00604e-05	0.00303492
PRKAB1	0.0605912	5.07049	9.0072e-05	0.00303492
CYS1	-0.672915	-1.36193	9.01695e-05	0.00303546
CTU1	0.0862225	3.04004	9.05126e-05	0.00304426
NFKBIA	0.0895171	6.565	9.07413e-05	0.0030492
B4GALNT2	-0.672776	-0.868198	9.10681e-05	0.00305743
ZNF493	0.103827	6.38681	9.1288e-05	0.00306205
GMPR	-0.229831	6.37271	9.20133e-05	0.00308025
GFY	-0.780154	-2.0122	9.20693e-05	0.00308025
PIK3CG	0.0756573	7.21077	9.21564e-05	0.00308025
TMEM262	-0.693425	-1.82595	9.21612e-05	0.00308025
LINC01133	-0.650231	-1.59155	9.245e-05	0.00308285
GATAD1	0.0637751	5.38849	9.24793e-05	0.00308285
C1QTNF7	-0.689067	-1.26859	9.24871e-05	0.00308285
GRIN2C	-0.673939	-0.261739	9.28255e-05	0.00309136
NEUROD2	-0.726035	-0.99532	9.29143e-05	0.00309156
CEP83-DT	-0.388087	-1.70411	9.31083e-05	0.00309326
AHNAK2	-0.673211	0.226345	9.31314e-05	0.00309326
SLC26A10P	-0.741217	-1.17775	9.32462e-05	0.00309431
BRF2	0.0622481	3.89272	9.3339e-05	0.00309464
PLBD1-AS1	0.131776	2.68859	9.34238e-05	0.00309469
NUP214	0.0668792	6.93416	9.36229e-05	0.00309749
S100A1	-0.784642	-2.44593	9.36744e-05	0.00309749
GULP1	-0.684693	-1.15507	9.40041e-05	0.00310343
DLGAP1-AS2	0.096978	2.90958	9.40205e-05	0.00310343
CYP4A22-AS1	-0.303867	-0.878683	9.4183e-05	0.00310377
FGF22	-0.564152	-1.06465	9.41976e-05	0.00310377
FAM90A1	-0.555186	-1.39908	9.44213e-05	0.00310808
CLEC2L	-0.440538	-0.735458	9.46122e-05	0.00310808
OSBPL3	0.0782032	5.56175	9.46165e-05	0.00310808
PRPH	-0.714466	-1.30649	9.4662e-05	0.00310808
CACNG2	-0.734563	-1.57092	9.49348e-05	0.00311357
P2RY1	-0.126648	2.8432	9.49963e-05	0.00311357
PCLO	-0.672283	-0.547193	9.51173e-05	0.0031148
PYGO1	-0.535472	-0.839322	9.5401e-05	0.00312135
H2BC7	0.135089	4.76482	9.5699e-05	0.00312835
GABRD	-0.632963	-0.783184	9.6238e-05	0.0031421
GATD1-DT	0.0898882	2.20392	9.64245e-05	0.0031421
LAMA5	-0.453642	1.62199	9.64653e-05	0.0031421
TRIM35	0.0684402	4.9681	9.6475e-05	0.0031421
NONOP2	0.0932245	1.69359	9.65412e-05	0.0031421
IFNL4P1	-0.778735	-2.34266	9.6901e-05	0.00314801
SGIP1	-0.333274	0.944168	9.69678e-05	0.00314801
LBX1-AS1	-0.685523	-1.08665	9.69762e-05	0.00314801
GUSBP17	0.191339	-0.211226	9.71388e-05	0.00315055
PPP2R5C	0.0755429	8.29138	9.74018e-05	0.00315633
SYCP1	-0.687127	-0.947285	9.76305e-05	0.00316099
RNU1-46P	-1.32893	-2.98575	9.77168e-05	0.00316104
SMIM29	0.0770123	2.96319	9.8217e-05	0.00317446
SLC16A9	-0.539961	-1.01181	9.85648e-05	0.00318119
KIF18B	-0.31596	-0.0220612	9.87386e-05	0.00318119
VWA5B2	-0.704047	-0.843569	9.87492e-05	0.00318119
RHOV	-0.666116	-1.7965	9.87667e-05	0.00318119
N4BP3	-0.186958	1.68732	9.88975e-05	0.00318127
STEAP3	-0.224954	0.80424	9.90227e-05	0.00318127
CC2D2A	-0.293367	0.806454	9.92016e-05	0.00318127
MED27	0.0638761	3.38614	9.92464e-05	0.00318127
LRRC4	0.125374	5.54493	9.93596e-05	0.00318127
CD55	0.122519	7.87931	9.94651e-05	0.00318127
CERS5	0.0640306	5.07812	9.95322e-05	0.00318127
CRACD	-0.388823	0.760005	9.95614e-05	0.00318127
CCDC175	-0.401666	-0.69297	9.95777e-05	0.00318127
ANKRD24	-0.356274	0.208508	9.96229e-05	0.00318127
MIR4744	0.172406	-1.02168	9.97665e-05	0.00318241
SH3D19	-0.421886	0.0185073	9.98877e-05	0.00318241
FKBP5	0.161456	7.11584	9.99146e-05	0.00318241
ESPL1	-0.292428	0.451787	0.000100051	0.00318286
SAPCD2P2	-0.754291	-2.04034	0.0001001	0.00318286
ANO7	-0.607961	-0.337899	0.000100278	0.0031858
ZNF114	-0.536653	-1.25455	0.00010126	0.00321426
NXPH4	-0.638617	-1.62023	0.000101548	0.00321698
TMEM221	-0.798813	-2.31984	0.000101565	0.00321698
PPIAP29	0.155114	1.52879	0.000101695	0.00321698
SP7	-0.567107	-2.00123	0.000101733	0.00321698
SUGT1P1	-0.356907	-2.03834	0.000101777	0.00321698
TXK	0.125199	6.70975	0.00010195	0.00321971
H2BC6-AS1	0.110347	1.62576	0.000102128	0.00322262
LINC01619	0.0992842	3.68517	0.000102486	0.00322942
OR7E100P	0.115879	1.2242	0.000102517	0.00322942
AGAP2-AS1	-0.555534	-2.02357	0.000102608	0.00322957
PROM1	-0.500421	0.278146	0.000102886	0.00323558
NOVA2	-0.706037	-0.684822	0.000102996	0.00323629
TNFRSF12A	0.113887	3.09478	0.000103272	0.00324225
ABCG4	-0.740829	-1.26102	0.00010375	0.00325328
C9orf43	-0.204658	-0.0238261	0.000103807	0.00325328
MTND5P32	0.22745	2.64317	0.000103886	0.00325328
CDH1	-0.211714	2.44402	0.000104137	0.00325532
SOX10	-0.714042	-1.55905	0.000104221	0.00325532
RLBP1	-0.726294	-2.03698	0.000104246	0.00325532
LINC00240	-0.443045	-0.836617	0.0001043	0.00325532
LINC03048	-0.480493	-1.6674	0.00010447	0.00325789
GOLGA8A	0.128157	5.5223	0.000104663	0.00325918
MED10	0.0688437	4.29084	0.000104734	0.00325918
DDX17	0.0731233	10.8267	0.00010484	0.00325918
HS3ST6	-0.790543	-2.19118	0.000104861	0.00325918
RNU7-13P	0.132988	2.09503	0.000105042	0.00326209
MORN2	-0.190841	-0.649497	0.000105239	0.00326281
SNX3	-0.155841	7.18095	0.000105405	0.00326281
SIAE	-0.0979422	2.73985	0.00010542	0.00326281
EEF1A2	-0.623484	-0.527362	0.000105596	0.00326281
MIR5692C2	0.12209	0.939458	0.000105614	0.00326281
FLNC	-0.658261	0.511928	0.000105645	0.00326281
RNF208	-0.688401	-2.36932	0.000105678	0.00326281
TMEM271	-0.753348	-1.75968	0.000106601	0.00328698
SDK1	-0.432466	1.38207	0.000106638	0.00328698
RNU1-140P	1.11707	-3.39213	0.00010736	0.00330651
FKBP6	-0.724433	-1.6409	0.000107649	0.00331268
ESRRA	0.073828	5.79102	0.000107848	0.00331604
PPP1R3C	-0.65917	-1.71847	0.000108032	0.00331713
SP6	-0.645807	-1.2517	0.000108106	0.00331713
PTGR3	0.0711082	6.3831	0.00010815	0.00331713
KIR2DL3	0.241995	-0.143256	0.000108546	0.00332654
LINC00919	-0.744254	-2.40021	0.000108842	0.00332838
ADAM3A	-0.799359	-2.27308	0.000108871	0.00332838
NCAN	-0.717564	-1.03688	0.000108874	0.00332838
FUT9	-0.74677	-1.5034	0.00010904	0.00333073
RNF114	0.0654141	6.40995	0.000109229	0.00333378
KIF4A	-0.245039	0.547858	0.000109574	0.00333964
COX6A2	-0.911947	-2.95584	0.000109601	0.00333964
KCNMB1	-0.141357	2.13519	0.000109734	0.00334097
PRR18	-0.671652	-1.33769	0.000110167	0.00335141
MDFI	-0.716105	-1.3721	0.000110328	0.00335358
PITX3	-0.758214	-2.08938	0.000110505	0.0033562
KLRG2	-0.681556	-1.54882	0.000110793	0.00336105
NANOG	-0.640043	-1.30655	0.000110935	0.00336105
KCNG2	-0.44882	-0.480919	0.000110944	0.00336105
TST	0.0987915	4.03869	0.000111025	0.00336105
HSPG2	-0.460056	1.87727	0.000111514	0.00337312
DVL1	0.072843	4.30256	0.000111721	0.00337407
PRDM7	-0.652508	-1.06742	0.000111726	0.00337407
UNC119	0.08637	5.82063	0.000111927	0.0033774
DYNC1I1	-0.452058	-0.111645	0.000112144	0.0033812
ERBB3	-0.594455	-0.385063	0.000112301	0.0033832
ACTG2	-0.693943	-1.39087	0.000112428	0.00338427
UTF1	-0.690421	-1.87848	0.000113165	0.00339942
CFI	-0.70382	-1.97916	0.00011318	0.00339942
PDHA1P1	-0.910294	-2.95571	0.000113205	0.00339942
GORAB-AS1	-0.398935	-1.19496	0.000113361	0.00340137
RNU6-125P	0.129203	0.904404	0.00011371	0.00340911
TLN2	-0.321721	2.45514	0.00011518	0.00345028
MYO1A	-0.266457	0.357628	0.000115268	0.00345028
CNTN3	-0.724264	-1.56359	0.000115667	0.00345943
CDR2L	-0.53722	-1.16683	0.000115925	0.00346437
PCDHB11	-0.686914	-1.92319	0.000116287	0.00347239
ARHGDIG	-0.697499	-1.68123	0.0001167	0.00347997
GNA12	-0.174769	4.45281	0.000116727	0.00347997
CTCF-DT	0.104269	1.4554	0.000116948	0.00348182
IQANK1	-0.639526	-0.767243	0.000116976	0.00348182
DCXR	0.0951144	3.62206	0.000117124	0.00348343
IGSF3	-0.520634	-0.0282097	0.000117934	0.00350473
PRDM2	0.0766229	7.00603	0.000118148	0.00350828
KCNJ2	0.131446	7.45383	0.000118525	0.00351668
CPSF4L	-0.435712	-1.29565	0.00011862	0.0035167
SUCLA2P3	-0.514176	-1.76131	0.000119176	0.0035286
DNAH17	-0.51081	0.97637	0.000119211	0.0035286
CES3	-0.575035	-1.30242	0.000119497	0.00352947
HYAL3	-0.136728	0.805742	0.000119504	0.00352947
ALG1L2	-0.199231	1.26884	0.000119556	0.00352947
LYPD4	-0.783239	-2.14476	0.000119709	0.00352947
RASSF7	0.0919864	3.42246	0.000119782	0.00352947
RPL10P19	0.149071	2.10193	0.00011998	0.00352947
NWD1	-0.530898	-0.367978	0.000119992	0.00352947
LINC00578	-0.496167	-1.86083	0.000119998	0.00352947
TTYH1	-0.701886	-0.43994	0.000120681	0.00353722
HOXA3	-0.538796	-0.543932	0.000120732	0.00353722
SLC22A31	-0.592733	-1.06995	0.000120868	0.00353722
SFRP5	-0.567206	-1.52854	0.000120876	0.00353722
SYT7	-0.678134	-0.351471	0.000120912	0.00353722
SAMD14	-0.452422	-0.0154757	0.000120989	0.00353722
FAM177A1	0.0627548	4.82592	0.000121003	0.00353722
TMEM59L	-0.773348	-2.00482	0.000121021	0.00353722
POU3F3	-0.657246	-1.32059	0.000121192	0.00353944
ADGB	-0.602198	-0.524894	0.000121845	0.00354955
LINC01914	-0.674906	-2.12146	0.000121854	0.00354955
NOS1AP	-0.492287	0.181081	0.000121872	0.00354955
MIR497HG	-0.609572	-1.26894	0.000121919	0.00354955
LINC01515	-0.580767	-1.08705	0.000122122	0.0035527
PPP1R13B-DT	-0.58989	-1.95815	0.000122459	0.00355611
PHF11	0.0873223	5.91592	0.000122469	0.00355611
LINC02909	-0.68943	-2.32769	0.000122526	0.00355611
SIAH2	-0.195429	7.10815	0.000122709	0.00355866
PHOX2A	-0.723331	-1.6786	0.000122999	0.00356428
RNF123	-0.126402	5.93859	0.000123529	0.00357262
PLPPR3	-0.624575	-1.11739	0.000123545	0.00357262
DENND10	0.075543	5.95034	0.000123574	0.00357262
SPON2	0.180365	4.57089	0.000123907	0.00357768
MMRN2	-0.59204	-0.465415	0.000123941	0.00357768
WNT3A	-0.709241	-1.50484	0.000124282	0.00358225
GALR2	-0.672624	-2.18	0.000124292	0.00358225
SLITRK4	-0.154678	2.41627	0.000124501	0.00358383
CABP1	-0.628019	-0.963372	0.000124984	0.00358383
PLVAP	-0.256279	2.60664	0.000124988	0.00358383
CXCR1	0.126421	8.24659	0.000125016	0.00358383
LINC01460	-0.733519	-1.82885	0.000125044	0.00358383
NUPR1	-0.626192	-1.36049	0.000125055	0.00358383
COX8C	-0.633011	-2.14564	0.000125202	0.00358383
TRPV6	-0.566133	0.160875	0.000125298	0.00358383
SCAND3	-0.525676	-0.287503	0.000125317	0.00358383
RN7SL634P	-0.294974	-1.59785	0.000125385	0.00358383
TENT5B	-0.411667	-1.49257	0.000125404	0.00358383
DGKI	-0.531338	0.4966	0.000125708	0.00358977
NLRP11	-0.630131	-1.14241	0.000125971	0.00359451
AIRE	-0.624017	-0.956745	0.000126398	0.00360298
CELF5	-0.613861	-0.634043	0.000126556	0.00360298
CASKIN2	-0.601215	-0.602246	0.000126558	0.00360298
MUC5B	-0.665562	0.987805	0.000127065	0.00361466
SKA3	-0.245229	1.85988	0.000127456	0.00362303
RNU6-936P	0.13451	0.202234	0.00012756	0.00362322
PDE2A	-0.29895	1.22574	0.000127725	0.00362512
ELN	-0.657379	-0.100133	0.000127862	0.00362626
PDIA2	-0.722142	-1.74897	0.000128447	0.00363783
SLC7A11-AS1	-0.700432	-1.40433	0.00012849	0.00363783
PLEKHA4	-0.433156	-0.454392	0.000128584	0.00363783
SULF1	-0.644212	-0.316657	0.000128692	0.00363783
CDC14A	0.0895941	6.52462	0.000128758	0.00363783
SLC39A5	-0.588335	-1.70296	0.00012896	0.00364077
SAXO3	-0.611346	-1.46499	0.000129229	0.00364391
FCGR1A	0.244738	4.39456	0.000129267	0.00364391
HERPUD1	0.0655487	6.16406	0.000129438	0.003646
DPP10	-0.623334	-0.6207	0.000129773	0.00365107
L3MBTL2-AS1	-0.172668	-0.1886	0.000129882	0.00365107
KCNA7	-0.719993	-1.03884	0.000130038	0.00365107
NEURL3	-0.467782	-1.13357	0.000130076	0.00365107
MEIOSIN	-0.724654	-1.65516	0.00013014	0.00365107
TSGA10IP	-0.451161	-1.57144	0.000130286	0.00365107
ADAM5	-0.715554	-1.91201	0.000130304	0.00365107
STK39	0.0936838	5.04781	0.00013068	0.00365884
PPP1R17	-0.276939	-0.661794	0.000131176	0.00366998
ARL4A	-0.192935	5.06301	0.000131548	0.00367567
LINC00641	0.0702544	5.23442	0.000131577	0.00367567
MELK	-0.21082	0.93602	0.00013183	0.00367997
SERF1B	0.139669	0.759716	0.00013203	0.00368281
SRCIN1	-0.656024	0.668843	0.000132394	0.0036891
PDK1	0.0916104	7.11888	0.000132453	0.0036891
C9orf78	-0.208576	8.01168	0.000132888	0.00369658
FGF7P1	-0.873578	-2.96089	0.000132966	0.00369658
DUSP4	-0.279726	0.911688	0.00013302	0.00369658
TLR6	0.102203	7.61795	0.00013314	0.00369718
SSTR2	-0.66992	-0.980349	0.000133412	0.00370195
RADIL	-0.660237	-0.136876	0.000133809	0.00371022
PCDH18	-0.408488	-1.42583	0.000134035	0.00371371
FAM8A1	0.12811	7.12883	0.000134339	0.00371859
HNRNPA3P14	-0.749261	-2.20573	0.00013447	0.00371859
LDHD	-0.236098	0.410644	0.00013451	0.00371859
SOX7	-0.482551	-1.59418	0.000134697	0.00371958
TUBAL3	-0.636114	-1.94619	0.000134746	0.00371958
SPDYE5	-0.720044	-2.01174	0.000134886	0.00372069
GIPC3	-0.437549	-0.859441	0.000135206	0.00372677
SLC9C2	-0.511441	-0.61214	0.000135418	0.00372985
COA1	0.0926014	6.5301	0.000135526	0.00373008
IFNL4	-0.714337	-1.95164	0.000135746	0.00373336
ZNF19	-0.123378	2.12913	0.000135937	0.00373586
ACVRL1	-0.277194	0.636061	0.000136057	0.00373642
OR1D2	-0.734639	-2.27744	0.000136538	0.00374685
HNRNPA1L3	-0.179654	0.945192	0.000136746	0.0037498
IKZF1	0.0832164	8.75689	0.000136992	0.00375219
ASIC1	-0.569515	-0.759737	0.000137116	0.00375219
CRK	0.0730316	6.45259	0.000137297	0.00375219
IATPR	0.135144	2.22654	0.000137336	0.00375219
RAB6B	-0.220644	1.87001	0.000137337	0.00375219
SPATA31H1	-0.679945	-0.513144	0.000137943	0.00376599
ACTG1P3	0.109887	2.059	0.000138075	0.00376683
SRRM3	-0.701509	-0.441117	0.000138476	0.00377352
TEX15	-0.648161	-0.503957	0.000138523	0.00377352
NFAT5	0.0933313	7.60024	0.000139005	0.00378031
NPFFR1	-0.668748	-0.596489	0.0001391	0.00378031
TROAP-AS1	-0.703758	-1.33713	0.00013921	0.00378031
VSIG1	0.106966	3.41347	0.000139321	0.00378031
PHLPP2	-0.0901567	4.83246	0.000139442	0.00378031
TRIM71	-0.424017	0.135456	0.000139444	0.00378031
NLRC3	0.0919869	6.76853	0.000139482	0.00378031
ADNP2	0.0504987	4.36695	0.00014001	0.00379186
NR4A1	-0.28854	1.03753	0.000140126	0.00379227
ANGPTL4	-0.718265	-1.82768	0.000140451	0.00379541
GRIN2D	-0.523341	-0.375369	0.000140505	0.00379541
RPS6P16	-0.623454	-2.67707	0.000140548	0.00379541
SMARCD1	0.0720011	4.47097	0.000141276	0.0038123
GOLGA6L6	-0.690827	-0.998033	0.000141487	0.00381322
PLA1A	-0.521707	-1.24152	0.000141604	0.00381322
TRHDE	-0.380541	0.0240272	0.000141617	0.00381322
LINC01592	-0.895542	-2.94508	0.000141756	0.00381421
ENTPD8	-0.69332	-1.30594	0.000142605	0.00383428
ITM2B	0.0894261	9.93732	0.000142889	0.00383916
SMCR5	-0.696313	-2.17528	0.000143187	0.00384278
TMEM275	-0.707425	-1.98715	0.000143231	0.00384278
DKK2	-0.434604	-1.26118	0.00014349	0.00384499
SLC29A4P2	-0.727637	-2.11646	0.000143519	0.00384499
DCAF5	0.0654851	6.03074	0.000143713	0.00384741
ERG28	0.0621781	2.62377	0.000144043	0.00385348
STX1B	-0.38612	-0.681851	0.000144359	0.00385867
HNRNPA1P76	-0.80498	-2.67948	0.000144444	0.00385867
IGHV3-73	0.257159	-1.06215	0.000144727	0.00386347
BSN	-0.570332	-0.0861934	0.000144991	0.00386775
TAP2	0.113291	6.06101	0.000145258	0.00387012
TOP2A	-0.188791	2.18129	0.000145345	0.00387012
HCG20	-0.318385	-1.71509	0.000145502	0.00387012
OR10H5	-0.695024	-1.21621	0.000145618	0.00387012
CCKBR	-0.704504	-1.43016	0.000145635	0.00387012
JPH3	-0.655351	-0.116461	0.000145703	0.00387012
SPEM2	-0.817225	-2.47431	0.00014597	0.00387444
P2RX6	-0.354937	-0.157351	0.000146217	0.00387824
GSC2	-0.747751	-2.19934	0.000146494	0.00388245
DNALI1	-0.564278	-1.50419	0.000146584	0.00388245
RAMP2	-0.755504	-2.24199	0.000147014	0.00389106
ANKRD36BP2	-0.292925	4.87137	0.000147142	0.00389168
CAMKV	-0.707231	-1.51439	0.000147318	0.00389182
SLC6A12-AS1	-0.710716	-2.22042	0.000147356	0.00389182
ZNF750	-0.706135	-2.09624	0.0001475	0.00389286
NPFFR2	-0.748812	-2.3633	0.000148013	0.00390365
SLC30A3	-0.699156	-0.888134	0.000148471	0.0039129
OR10H1	-0.677078	-1.46542	0.000148622	0.0039129
SLC29A4	-0.625869	-0.77097	0.000148679	0.0039129
CACNA1H	-0.463565	1.24953	0.000148916	0.00391467
PEG3	-0.513793	0.212621	0.000148956	0.00391467
PCLAF	-0.192433	-0.0333362	0.00014922	0.00391783
ERRFI1-DT	-0.614256	-1.47456	0.000149291	0.00391783
GBX1	-0.7274	-1.77304	0.000149432	0.00391783
RBFADN	-0.243891	0.331611	0.000149511	0.00391783
OPRD1	-0.681949	-0.455857	0.000149602	0.00391783
DIDO1	0.0671566	7.30556	0.000149983	0.00392293
PRODH2	-0.754388	-2.16875	0.000150102	0.00392293
PRRX1	-0.665196	-0.799918	0.000150113	0.00392293
SPATA17	-0.569132	-1.30205	0.000150443	0.00392767
BIRC7	-0.519877	-1.18738	0.00015058	0.00392767
EDEM2	0.064373	5.61971	0.00015061	0.00392767
CFAP157	-0.629749	-1.31705	0.000150933	0.00393221
RPS29P16	0.119521	-0.190751	0.000150996	0.00393221
DPF1	-0.669417	-0.244848	0.00015157	0.00394441
LINC02991	-0.699735	-1.7585	0.000151715	0.00394545
OR2J3	-0.662648	-1.81379	0.000151904	0.00394613
SLC30A4-AS1	-0.553594	-1.59488	0.000151967	0.00394613
AZGP1	-0.722695	-2.02344	0.000152059	0.00394613
ANKRD20A21P	-0.54916	-0.797928	0.000152355	0.00394985
CAGE1	-0.251448	-0.257453	0.000152414	0.00394985
NOVA1	-0.580657	-1.19599	0.000152727	0.00395521
CUTA	0.083896	3.59771	0.000153038	0.00395892
LINC00616	-0.727988	-2.16371	0.000153083	0.00395892
TRBD1	0.128149	1.70118	0.000153276	0.00396116
TMEM120A	0.0816991	3.97891	0.000153902	0.00397452
SRSF12	-0.562468	-1.551	0.000154007	0.00397452
GPR179	-0.612006	0.0236518	0.000154372	0.0039812
CPLX1	-0.601859	-1.05141	0.000154589	0.00398404
FAM210B	-0.212151	8.29491	0.000154785	0.0039847
RASSF3	0.0881276	7.76064	0.000154829	0.0039847
YKT6	0.0584318	5.54249	0.000154973	0.00398566
TRIM25	0.122067	8.0671	0.000155096	0.00398606
LMAN2	0.0674404	6.54945	0.000155272	0.00398785
CTCFL	-0.68968	-0.646436	0.000155836	0.00399957
SHISA5	0.116197	6.23853	0.000156282	0.00400827
SAG	-0.448783	-0.0770619	0.000156685	0.00401402
SLC2A1-DT	-0.180225	1.12497	0.000156722	0.00401402
GPATCH8	0.0659788	6.57128	0.000157052	0.0040176
TRIM54	-0.65234	-1.44419	0.000157197	0.0040176
SULT2B1	-0.603497	-1.52566	0.000157397	0.0040176
IBA57	-0.0995193	4.38009	0.000157518	0.0040176
DGKB	-0.71962	-1.2251	0.000157542	0.0040176
CFAP69	-0.473938	-0.428553	0.000157566	0.0040176
STRADBP1	-0.241061	0.558012	0.000157693	0.0040176
OR2V2	-0.716933	-1.80564	0.000157724	0.0040176
HSPB6	-0.683722	-2.21287	0.000158032	0.0040227
TMEM212	-0.721335	-2.14212	0.000158306	0.00402691
NAT8L	-0.510893	0.0998245	0.000159179	0.00404477
MPP3	-0.380988	0.218423	0.000159225	0.00404477
XPO6	0.103773	9.65518	0.00015939	0.00404482
CLDN3	-0.731421	-2.17752	0.000159578	0.00404482
PKD2	0.0788886	4.66746	0.000159621	0.00404482
TBX1	-0.495727	-0.448301	0.000159661	0.00404482
OSM	0.146748	2.55552	0.000159822	0.00404615
PLAT	-0.605903	-0.713945	0.000160264	0.00405314
NEURL1B	-0.405797	0.217609	0.000160316	0.00405314
RPL26L1-AS1	-0.507948	-1.87552	0.000160651	0.0040546
RTKN2	0.178267	4.03159	0.00016079	0.0040546
TMEM235	-0.757156	-1.96184	0.00016087	0.0040546
MYPN	-0.685859	-0.929957	0.0001609	0.0040546
PTPRN	-0.442684	0.111818	0.000160918	0.0040546
GNA11	-0.218765	1.11531	0.000161121	0.00405698
XPOTP1	-0.390421	-1.61303	0.000161769	0.00406986
NRARP	-0.553057	-1.99986	0.000161851	0.00406986
PDF	0.0859822	1.91498	0.000162467	0.00407789
IGDCC4	-0.59688	-0.0338719	0.000162542	0.00407789
ASB16	-0.706376	-1.90149	0.000162565	0.00407789
RNU6-759P	0.109396	1.12616	0.000162608	0.00407789
MYH7B	-0.55514	0.475565	0.000162872	0.00408176
SPNS2-AS1	-0.68454	-2.80353	0.000163169	0.00408183
CELA2A	-0.76453	-2.65238	0.000163339	0.00408183
KREMEN2	-0.533767	-1.22834	0.000163368	0.00408183
CDKL1	-0.0966425	4.20105	0.000163371	0.00408183
PPP4R2P5	-0.599168	-2.01796	0.000163422	0.00408183
SGMS1-AS1	0.0716705	4.17554	0.000163536	0.00408193
RARRES2	-0.700961	-1.71637	0.000163671	0.0040825
BCAN-AS1	-0.685236	-1.89564	0.000163777	0.0040825
UNC5C	-0.548401	-0.32723	0.000164236	0.00409119
GUCY2C	-0.544704	-1.07067	0.000164374	0.00409189
LINC02616	-0.781961	-2.83318	0.000164834	0.00409443
RN7SL692P	-0.666799	-2.05851	0.000164881	0.00409443
VSIG10L	-0.428028	-0.644487	0.00016495	0.00409443
LINC00607	-0.502448	-0.387446	0.000165002	0.00409443
LRRC9	-0.619272	-1.05113	0.000165102	0.00409443
SLC5A5	-0.276911	-0.252947	0.000165237	0.00409443
IGSF9	-0.666335	-0.442489	0.000165245	0.00409443
CSTF1	0.0553156	4.67183	0.000165686	0.00410264
SAMD7	-0.637254	-1.78912	0.000165946	0.0041052
GAL3ST3	-0.76332	-2.01233	0.00016601	0.0041052
PCDHA11	-0.694509	-1.94076	0.00016628	0.00410768
NPY1R	-0.680865	-1.85845	0.000166446	0.00410768
NKX2-4	-0.670215	-1.04216	0.000166497	0.00410768
CCDC166	-0.755839	-2.17335	0.000166551	0.00410768
SLC35F1	-0.663	-1.46151	0.000166782	0.00411064
RNU6-1062P	0.143597	1.46206	0.000167134	0.00411659
OR5AU1	-0.685931	-1.4666	0.000167414	0.00411862
PDK2	-0.12608	3.16192	0.000167437	0.00411862
PRSS42P	-0.421109	-0.919164	0.000167707	0.00412255
TPX2	-0.16508	1.37087	0.000167848	0.0041233
BRSK2	-0.637847	0.421441	0.000168209	0.00412944
DYNC1LI2-DT	-0.688058	-2.00343	0.000168377	0.00413082
PDE1A	-0.587647	-1.1989	0.00016851	0.00413137
NLGN2	-0.458042	-0.37081	0.000168851	0.00413702
PCAT4	-0.726646	-2.188	0.000169041	0.00413748
PTPN11P2	-0.557905	-1.84824	0.000169092	0.00413748
SPTBN2	-0.54619	0.611994	0.000169344	0.00414053
GABRA4	-0.619478	-0.73868	0.00016944	0.00414053
TRIM24	0.0629061	5.52932	0.00016955	0.00414053
BTG2-DT	0.141915	1.91335	0.00016984	0.00414082
PIANP	-0.662664	-1.60846	0.000170085	0.00414082
TARS3	0.0681463	4.96964	0.000170119	0.00414082
MPDZ	-0.611835	0.115527	0.000170285	0.00414082
RNF223	-0.723717	-1.88398	0.000170353	0.00414082
KCNQ2	-0.640527	1.1218	0.000170487	0.00414082
SVEP1	-0.600247	0.429412	0.000170669	0.00414082
TESK1	0.114019	2.40009	0.000170708	0.00414082
CHRM2	-0.711608	-1.37489	0.000170717	0.00414082
ADGRA1	-0.671368	-0.193927	0.00017082	0.00414082
ZNF862	0.0802436	5.29587	0.000170975	0.00414082
EHF	-0.385518	-0.268174	0.000170986	0.00414082
SPRED3	-0.392989	-0.170857	0.000171214	0.00414082
GP6	-0.218503	0.699248	0.000171292	0.00414082
TM9SF1	0.0656861	2.26164	0.000171409	0.00414082
SLFN13	0.0979171	5.70362	0.000171419	0.00414082
AKR1B1	0.064866	3.85299	0.000171451	0.00414082
ALDH1A3	-0.659245	-0.516174	0.000171713	0.00414447
TERB2	-0.675996	-2.57295	0.00017214	0.00415208
CHST9	-0.650141	-0.747948	0.000172291	0.00415304
LINC01992	-0.537194	-1.92186	0.000172666	0.00415939
SLC9A3	-0.558197	-0.194289	0.000173049	0.00416293
GABRA2	-0.700731	-1.02498	0.000173117	0.00416293
RGSL1	-0.594857	-0.242554	0.000173148	0.00416293
BEST2	-0.671447	-1.60119	0.000173739	0.00417286
FBXO27	-0.633458	-1.26346	0.000173785	0.00417286
EPC1	0.0811813	7.28813	0.000174273	0.00418104
TMEM45B	0.152488	3.13397	0.00017435	0.00418104
APPL2	0.0745112	5.9896	0.00017462	0.00418482
PTGER1	-0.671742	-1.94259	0.000174787	0.00418612
LINC01792	-0.651545	-2.1733	0.000175012	0.00418662
JAG2	-0.413616	0.538748	0.000175033	0.00418662
RPS12P3	0.109099	0.0483935	0.000175272	0.0041883
CRADD	0.066221	4.0342	0.000175327	0.0041883
CARD10	-0.629021	-0.481615	0.000175456	0.00418869
HNRNPA1P10	-0.195431	-0.00997457	0.000175761	0.00419309
JPH2	-0.641051	-0.325017	0.000175865	0.00419309
C8orf33	0.0518577	4.33463	0.00017598	0.00419313
SEC24D	0.0651645	5.30036	0.000176697	0.00420599
DHH	-0.478027	-1.2276	0.000176745	0.00420599
ATP1B2	-0.370456	-0.933586	0.000177299	0.00421607
CD34	-0.512116	-0.210097	0.000177395	0.00421607
USHBP1	-0.651052	-1.48476	0.00017764	0.0042192
SLC25A18	-0.665283	-1.10086	0.00017776	0.00421936
NOP53	0.116239	7.77335	0.000178028	0.00422045
OVOL2	-0.673783	-1.33428	0.00017814	0.00422045
RYR2	-0.545321	0.946795	0.000178334	0.00422045
C2CD4C	-0.68087	-0.922079	0.000178362	0.00422045
LINC01602	-0.740606	-2.55978	0.000178372	0.00422045
OBSL1	-0.507362	0.526093	0.000178628	0.00422148
RN7SL210P	-0.493195	-2.13329	0.000178647	0.00422148
KCNG3	-0.603434	-1.09492	0.000178755	0.00422148
S100A5	-0.215929	-1.28067	0.000179055	0.00422219
SNCB	-0.695163	-1.58207	0.000179181	0.00422219
MYO3A	-0.547579	-0.127946	0.000179201	0.00422219
ADM-DT	0.130786	2.13781	0.000179238	0.00422219
PCID2	0.0638489	5.76672	0.000179614	0.00422835
ZNF98	-0.582942	-2.07954	0.000180003	0.004234
SLC26A8	0.176569	3.04221	0.000180081	0.004234
CACTIN-AS1	-0.352381	-0.727726	0.00018038	0.00423836
FIS1	-0.148849	6.36513	0.000180496	0.0042384
ADGRV1	-0.468938	1.73526	0.000180908	0.00423975
CIMAP1A	-0.594897	-1.79789	0.000180947	0.00423975
GRK1	-0.637579	-0.956707	0.000181112	0.00423975
SOST	-0.679383	-1.54582	0.000181184	0.00423975
CLDN4	-0.633868	-1.34867	0.00018128	0.00423975
EDEM1	0.0762743	7.16095	0.000181311	0.00423975
PDE6A	-0.632944	-0.698081	0.000181349	0.00423975
DUX4L18	-0.624831	-0.647162	0.000181558	0.00424197
ROBO2	-0.683447	-0.415979	0.000181887	0.00424699
ZBTB7C	-0.561965	0.498124	0.000182112	0.00424957
CPS1	-0.371263	0.4987	0.000182343	0.00425232
GAS6-DT	-0.63121	-2.10522	0.000182549	0.00425241
LINC01266	-0.484984	-1.96129	0.000182576	0.00425241
PTPRD	-0.565048	-0.0521172	0.000183063	0.00425745
ANTXR1	-0.634304	-0.632693	0.000183141	0.00425745
GPLD1	-0.180537	1.67428	0.000183198	0.00425745
IFRD2	-0.102451	3.8674	0.000183249	0.00425745
PYGO2-AS1	0.100493	0.923354	0.000183546	0.0042601
PCSK4	-0.429617	-0.353826	0.000183592	0.0042601
NEFH	-0.394675	-0.264883	0.000184225	0.00427178
LIN28A	-0.733133	-1.7347	0.000184324	0.00427178
LIF	-0.413126	-1.21711	0.000184522	0.00427371
ADGRG6	-0.265295	0.710345	0.000184707	0.00427534
TGM5	-0.657662	-1.34718	0.000185121	0.00428227
MLNR	-0.549796	-1.48279	0.000185357	0.00428398
GPC4	-0.385662	-0.448295	0.000185425	0.00428398
DUX4L17	-0.617081	-0.866598	0.00018572	0.00428813
SLC7A2	-0.655027	-0.576574	0.000186004	0.00429087
IGFBP2	-0.376472	0.473982	0.000186099	0.00429087
MAG	-0.610363	-1.15462	0.000186243	0.00429087
OR7E25P	-0.671147	-1.50573	0.000186299	0.00429087
TRPM5	-0.58095	-0.306646	0.000186441	0.00429149
EN2	-0.678248	-1.41105	0.000186566	0.00429171
RIMS1	-0.660721	-0.301134	0.000186838	0.0042953
ADGRA2	-0.244805	1.29962	0.000187481	0.0043005
GRIK5	-0.56655	-0.710736	0.000187567	0.0043005
GOLGA5P1	0.104713	4.52019	0.000187618	0.0043005
CFAP300	-0.663674	-1.88641	0.000187691	0.0043005
ETV1	-0.503449	-0.592564	0.000187694	0.0043005
NPTX1	-0.520818	-0.121798	0.000187765	0.0043005
ERICH2-DT	-0.426345	-0.84319	0.000187871	0.0043005
CDH18	-0.735985	-1.76487	0.00018824	0.00430406
OR7C1	-0.680236	-1.0708	0.000188258	0.00430406
RIIAD1	-0.673556	-1.57217	0.00018861	0.00430946
PCDHB1	-0.686103	-1.39268	0.000189019	0.00431617
ARPP19P1	-0.758682	-3.10854	0.000189223	0.00431818
KIRREL2	-0.67901	-1.34049	0.000189457	0.00432088
PPM1E	-0.606625	-1.06962	0.000189578	0.00432098
SSC4D	-0.520364	-1.27722	0.000190031	0.00432545
ATAD3C	-0.378706	-0.584181	0.00019032	0.00432545
IL16	0.0736407	8.95559	0.0001904	0.00432545
RNASEL	0.0801466	6.69974	0.00019045	0.00432545
H1-7	-0.464762	-1.52738	0.000190459	0.00432545
ATG16L1	0.062264	6.06277	0.00019047	0.00432545
CD247	0.0957686	7.21811	0.000190808	0.00432985
LINC01888	0.0941341	0.681038	0.000190896	0.00432985
SPG21	0.0655222	6.41107	0.000191107	0.00433096
TRIM50	-0.647798	-1.64008	0.000191194	0.00433096
GALNT9	-0.618957	0.397707	0.000191344	0.00433096
CD248	-0.308819	-0.629993	0.000191567	0.00433096
LRIG1	0.0733601	5.338	0.00019159	0.00433096
UNC5B	-0.545468	-0.0200312	0.000191738	0.00433096
SSTR4	-0.690853	-1.88918	0.000191759	0.00433096
UBXN2B	0.0912204	6.80908	0.000193116	0.00435898
CA1	-0.287607	6.38851	0.00019378	0.00436776
AK7	-0.416385	-0.334893	0.000193848	0.00436776
CR1L	-0.185413	3.73988	0.000193929	0.00436776
HR	-0.658001	-0.0642964	0.000193974	0.00436776
CSPG4	-0.604761	-0.135072	0.000194162	0.00436786
TNFSF8	0.0937176	5.28623	0.000194213	0.00436786
RNF152	-0.282315	1.06068	0.000194348	0.00436826
SHCBP1L	-0.662216	-1.2145	0.000194492	0.00436885
TRIM31-AS1	-0.772265	-2.8839	0.000194694	0.00437077
LINC02240	-0.58681	-0.752504	0.00019485	0.00437164
WNT7B	-0.639285	-0.255797	0.000194979	0.00437189
RN7SL277P	0.442126	-0.152213	0.000195663	0.00438459
EFNB3	-0.688706	-1.75997	0.000195805	0.00438514
FZD6	0.154238	2.08804	0.000196471	0.00439741
SP8	-0.675175	-1.34268	0.000196793	0.00440148
EFNA2	-0.801258	-2.321	0.000196889	0.00440148
PTGS2	0.137295	5.57927	0.000197013	0.00440161
LINGO4	-0.39224	-1.5786	0.000197423	0.00440812
GATA5	-0.692222	-1.17289	0.000198033	0.0044191
EPHA6	-0.687398	-1.27873	0.000198283	0.00442204
OSMR	-0.607933	-0.549045	0.000198555	0.00442545
ELF5	-0.559627	-1.32658	0.000198979	0.00443087
CHEK2P2	-0.640843	-0.710283	0.000199037	0.00443087
HNRNPA1P32	-0.7997	-2.66339	0.000199155	0.00443087
RDM1	-0.270212	-0.523637	0.000199488	0.00443094
F2RL3	-0.203618	0.51176	0.000199598	0.00443094
MUC5AC	-0.64475	0.806898	0.000199616	0.00443094
UBR5-DT	0.109545	5.00148	0.000199634	0.00443094
OXTR	-0.307806	0.5156	0.000200129	0.00443928
PC	-0.208159	1.51924	0.000200247	0.00443928
CALML3	-0.668584	-1.57513	0.000200429	0.00444066
ITGB4	-0.335971	0.76888	0.00020062	0.00444226
TCF7L1	-0.612154	-1.02863	0.000200791	0.00444329
NEUROD4	-0.506993	-1.57933	0.000200905	0.00444329
GBP1P1	0.332308	1.1327	0.000201051	0.00444388
NAT8B	-0.186625	0.414619	0.000201644	0.00445351
LINC02774	-0.675092	-1.75952	0.000201741	0.00445351
SERPINE1	-0.299826	-0.565597	0.000202019	0.00445351
PAPLN	-0.290526	1.12968	0.000202022	0.00445351
LINC01415	-0.430901	-0.936078	0.000202085	0.00445351
ALX1	-0.888549	-3.00143	0.000202829	0.00446513
ANKRD65	-0.601084	-1.61402	0.000202851	0.00446513
LINC01606	-0.594802	0.154461	0.000203055	0.00446698
PRR33	-0.423949	-1.41551	0.000203287	0.00446943
RND3	-0.675526	-1.67905	0.000203447	0.00447032
ALOX5AP	0.123528	6.97604	0.000203742	0.00447121
KLRF1	0.191629	5.14064	0.000203777	0.00447121
RNU6-1017P	-0.267192	-2.11321	0.000203848	0.00447121
ABHD17A	0.0923208	7.03641	0.000204356	0.00447971
NOP53-AS1	-0.471478	-2.48664	0.000204773	0.00448125
GUSBP10	-0.809558	-2.88267	0.00020478	0.00448125
CTBP1-AS	-0.431526	-0.824374	0.000204786	0.00448125
SGCA	-0.465799	-1.30939	0.000205081	0.00448423
ZNF22-AS1	-0.235134	-0.21985	0.000205173	0.00448423
CCDC40	-0.501802	0.0250472	0.000205305	0.00448423
SYT8	-0.70639	-1.39142	0.000205404	0.00448423
NCAPG	-0.24908	1.53278	0.000205566	0.00448515
GPNMB	-0.369063	-0.130186	0.000205735	0.0044862
PPP4R2P6	-0.575996	-2.34672	0.000206377	0.00449758
TMEM117	0.0834479	2.48516	0.000206956	0.00450658
NLE1	0.0751036	3.56603	0.000207032	0.00450658
CIBAR1	-0.336518	0.128512	0.000207183	0.00450723
OR14K1	-0.767941	-3.08544	0.000207328	0.00450739
ZNF812P	-0.626243	-1.91756	0.000207432	0.00450739
CCN2	-0.528622	-1.70072	0.000207589	0.00450816
RN7SL124P	0.188769	0.356786	0.000207718	0.00450835
C1QTNF1	-0.642849	-0.739899	0.000208015	0.00451215
HOXA11	-0.6782	-1.9771	0.000208413	0.00451688
RND2	-0.573109	-1.20517	0.000208496	0.00451688
DNM3OS	-0.582283	-2.054	0.000208782	0.00451688
HMGN2P7	-0.620107	-2.7679	0.000208815	0.00451688
CLTCL1	-0.122352	3.62924	0.000208839	0.00451688
LINC01666	-0.604106	-1.92864	0.000209322	0.00452116
KASH5	-0.646163	-0.852907	0.000209347	0.00452116
GRIA4	-0.704131	-1.1777	0.000209401	0.00452116
RGS4	-0.647437	-1.45439	0.000209679	0.00452248
ADAMTSL2	-0.526367	0.240942	0.000209741	0.00452248
KRT19	-0.649545	-1.63064	0.000209826	0.00452248
CXCL16	0.134494	4.32464	0.000210194	0.00452294
MYH11	-0.588038	0.604649	0.000210214	0.00452294
ONECUT3	-0.716186	-1.06669	0.000210287	0.00452294
ZPBP2	-0.378028	-1.52971	0.000210333	0.00452294
ADGRL3	-0.657525	-0.829468	0.000210803	0.00452934
RIPPLY2	-0.668236	-1.30899	0.000210928	0.00452934
TET2	0.0904692	8.84588	0.000211053	0.00452934
LRP5	-0.29355	1.19535	0.000211116	0.00452934
KCND3	-0.308598	0.604636	0.000211369	0.00453215
ADGRL4	-0.716357	-2.3312	0.000211723	0.00453632
LHX2	-0.65615	-1.11968	0.000211807	0.00453632
SMTNL2	-0.66376	-1.2433	0.00021218	0.00454036
FOXP2	-0.638992	-0.723673	0.000212253	0.00454036
ARHGEF10L	-0.121781	4.38403	0.000212441	0.00454036
C7orf78	-0.671609	-2.06598	0.0002126	0.00454036
ZC3H10	0.0549189	4.64386	0.000212605	0.00454036
SMO	-0.567106	-0.543887	0.000212746	0.00454078
NPY5R	-0.690179	-1.70422	0.000213136	0.00454649
RPL21P119	-0.510772	-2.7814	0.000213275	0.00454685
FOXB2	-0.679835	-1.78276	0.000213473	0.00454848
C9orf50	-0.736488	-2.17872	0.000214448	0.00456664
PLCXD3	-0.667729	-1.32174	0.000214892	0.00457263
GPRC5C	-0.375991	0.213321	0.000214975	0.00457263
RPL26	-0.325541	4.84049	0.000215355	0.00457572
NKX1-1	-0.722543	-1.71378	0.000215366	0.00457572
RPL31P2	-0.45631	-2.16039	0.000215727	0.00457803
LINC01625	-0.708448	-2.57719	0.000215898	0.00457803
SHC2	-0.601158	-0.592771	0.000215961	0.00457803
ZPLD2P	-0.627277	-1.84987	0.000215966	0.00457803
ZNF385C	-0.552953	-0.803755	0.000216442	0.00458484
ANAPC1P4	0.19378	-1.42774	0.000216545	0.00458484
NR5A2	-0.564104	-0.790943	0.000216701	0.00458484
BBS4	0.0557028	3.81696	0.000216779	0.00458484
NLRP7	-0.381749	-0.461947	0.000217229	0.00458775
PRAMEF13	-1.03079	-3.12712	0.000217264	0.00458775
FARS2	0.065965	4.63517	0.000217286	0.00458775
RNU4-86P	-0.94089	-3.23425	0.000217756	0.00459
ATP9A	-0.145441	3.48016	0.000217874	0.00459
BTBD6	0.0778179	3.92296	0.000217885	0.00459
EFNB2	-0.378495	-0.227911	0.000217885	0.00459
RHBDL2	-0.669734	-1.32737	0.000218047	0.00459081
PDE4C	-0.754745	-2.30366	0.000218486	0.00459746
OR2W1-AS1	-0.673739	-2.37908	0.000218995	0.00460557
ZNF747	0.0687965	2.8316	0.000219269	0.00460563
RHEBP2	-0.188647	-0.661618	0.000219324	0.00460563
TOX	0.110311	2.96203	0.000219369	0.00460563
MID2	0.0846714	2.49951	0.000219847	0.00461064
PCAT19	-0.548729	-2.15595	0.000219855	0.00461064
PCDHB9	-0.564713	-1.98704	0.00022011	0.00461339
GCAT	-0.269558	2.43082	0.000220452	0.00461544
KNL1	-0.165953	3.12982	0.000220455	0.00461544
USP6NL-AS1	-0.540777	-1.78767	0.000220677	0.0046175
PIGB	0.108104	6.36225	0.000221067	0.00462305
C1orf167	-0.620983	-0.494399	0.00022142	0.00462783
LEMD1	-0.590038	-1.34427	0.000222024	0.00463469
HMGB2P1	-0.460375	-2.59514	0.000222036	0.00463469
CNTNAP5	-0.671738	-1.13477	0.000222121	0.00463469
FOXD3	-0.664443	-1.62053	0.000222321	0.00463626
LINC01800	-0.158207	0.36116	0.000222875	0.00464522
C10orf55	-0.578687	-1.87222	0.000223171	0.00464879
REEP1	-0.456345	-0.0883777	0.000223372	0.00465039
ZNF875	0.0768919	5.26456	0.00022376	0.00465525
ZNF251	0.0554457	3.9847	0.000223856	0.00465525
PCDHB4	-0.624408	-1.86789	0.000224001	0.00465568
ADIPOR1P2	-0.676406	-2.88337	0.000224439	0.00466129
CREG2	-0.4105	-0.62101	0.000224521	0.00466129
HES2	-0.643378	-0.51879	0.000224729	0.00466215
KCNJ6	-0.629326	0.114068	0.000224813	0.00466215
C3orf80	-0.538727	-1.0183	0.000224955	0.00466249
MAGI2	-0.434806	1.07988	0.000225341	0.00466791
TLL1	-0.686575	-1.1829	0.000225533	0.00466928
DLGAP1-AS1	0.0892463	3.03709	0.000226195	0.00468038
IGFALS	-0.482861	-1.31909	0.000226763	0.00468685
PHGDH	-0.273378	1.48033	0.000226807	0.00468685
SKA1	-0.247626	-0.222751	0.000226884	0.00468685
TMPRSS11BNL	-0.67134	-2.07292	0.000227554	0.00469808
LINC00923	-0.516337	-0.111202	0.000227777	0.00470008
NDUFV2	0.0716287	4.10408	0.000227994	0.00470194
PKMYT1AR	-0.632897	-2.74856	0.00022815	0.00470256
KCNK17	-0.390946	-0.483678	0.000228335	0.00470378
COX10	0.054594	3.65773	0.000228837	0.00471152
COL1A1	-0.659247	-0.266629	0.000229267	0.00471776
CPB2-AS1	-0.425315	-0.228841	0.000229547	0.00471941
PCDHA5	-0.665906	-1.80442	0.0002296	0.00471941
KILH	-0.681846	-1.82843	0.000230641	0.00473802
RAB33A	0.0953237	1.43052	0.000230766	0.00473802
FBLN2	-0.28967	0.962304	0.000231078	0.00473802
C14orf39	-0.654663	-1.20237	0.000231178	0.00473802
NRIP3-DT	-0.628579	-1.95344	0.000231307	0.00473802
NBPF26	0.189675	6.22296	0.00023133	0.00473802
DGCR6L	0.0767793	3.7368	0.000231396	0.00473802
C16orf46	-0.486695	-2.52913	0.000231621	0.00474003
DEPDC4	-0.300609	-0.680606	0.000231755	0.00474017
TRGV5	-0.309936	0.44086	0.000232469	0.00475217
PLCXD2	0.0911758	5.14191	0.000232764	0.00475268
RNU6-37P	0.150087	-0.543374	0.000232789	0.00475268
PROS2P	-0.744271	-2.56996	0.000232877	0.00475268
WBP1L	0.0657836	6.17989	0.000233026	0.00475312
OTOR	-0.550179	-1.53728	0.000233384	0.00475434
SHANK3	-0.604955	0.518954	0.000233404	0.00475434
FAM20C	-0.205753	1.69241	0.000233469	0.00475434
CACNA1A	-0.580178	1.79706	0.000233669	0.00475581
AMER1	0.0752987	3.25985	0.000233935	0.0047574
LRRIQ3	-0.237838	0.603516	0.000234059	0.0047574
LINC01694	-0.427114	-0.998166	0.00023413	0.0047574
PCDHA8	-0.679416	-2.12857	0.000234269	0.00475764
CACNA1G	-0.650765	0.349008	0.000234917	0.00476572
NSMCE3	0.0706693	4.11489	0.000234923	0.00476572
NKX3-2	-0.648987	-1.2348	0.000235296	0.00476583
URAHP	-0.649009	-2.02337	0.00023548	0.00476583
ANKRD30B	-0.644765	-0.931259	0.000235528	0.00476583
VCF1	-0.154475	7.50751	0.000235559	0.00476583
DHX9P1	-0.441699	-1.9247	0.000235568	0.00476583
IER5L-AS1	-0.303456	-1.21223	0.000236023	0.0047676
IL33	-0.601487	-2.12076	0.000236166	0.0047676
TSACC	-0.400012	-1.86336	0.00023653	0.0047676
IGFBPL1	-0.632514	-1.50471	0.000236701	0.0047676
CREB3L1	-0.681476	-1.44655	0.000236722	0.0047676
UNC80	-0.590988	0.528178	0.000236953	0.0047676
SP9	-0.675794	-1.66938	0.00023699	0.0047676
LINC00472	-0.622636	-1.57577	0.000237144	0.0047676
KCNT2	-0.505878	-1.19042	0.000237351	0.0047676
C2CD6	-0.479617	-0.694627	0.000237352	0.0047676
GXYLT2	-0.57516	-1.52861	0.000237481	0.0047676
SPRY4	-0.626786	-0.985642	0.000237508	0.0047676
CPNE6	-0.698882	-1.68603	0.000237599	0.0047676
CLIC2	-0.163738	3.14127	0.000237612	0.0047676
ZNF516	0.108934	7.55868	0.000237679	0.0047676
SCYL3	0.0733943	5.75825	0.000237702	0.0047676
PHLDB1	-0.516047	1.15737	0.000238001	0.00476959
CDKN2C	-0.114606	2.24649	0.000238057	0.00476959
LINC02388	-0.718046	-2.29558	0.00023839	0.00477368
MAPK8IP2	-0.571058	-0.527725	0.000239037	0.00477548
ACP7	-0.609439	-1.27397	0.000239054	0.00477548
IGSF3P1	-0.696765	-2.09178	0.000239294	0.00477548
PLXNB3	-0.527661	-0.648355	0.000239348	0.00477548
DNAJB7	-0.69299	-1.99731	0.00023935	0.00477548
PAIP1P2	-0.182732	0.203989	0.000239444	0.00477548
S1PR4	0.0911829	6.47902	0.00023946	0.00477548
HRH3	-0.707936	-1.71046	0.000239614	0.00477548
MIR181B2	0.19333	-1.18494	0.000239964	0.00477548
SYNPR	-0.637577	-1.23135	0.000240027	0.00477548
PLTP	-0.277577	-0.229563	0.00024017	0.00477548
FXYD3	-0.725564	-2.10179	0.000240223	0.00477548
TNNI3	-0.633902	-1.39903	0.000240379	0.00477548
DKK1	-0.660808	-2.26876	0.000240463	0.00477548
TMC1	-0.531839	-0.163998	0.00024065	0.00477548
ASAP3	-0.306361	0.612388	0.00024071	0.00477548
CNTLN	-0.0987831	3.86832	0.000240809	0.00477548
EXO1	-0.229995	0.487403	0.000240851	0.00477548
HOXA11-AS	-0.655653	-1.53617	0.000240914	0.00477548
FBXO16	-0.56588	-1.86305	0.000241135	0.00477733
C7	-0.607088	-1.16034	0.000241479	0.00478159
PHLDA2	-0.561307	-2.23362	0.000241796	0.00478533
TNFRSF11B	-0.594919	-1.93076	0.000242087	0.00478642
LGI4	-0.460493	-0.398122	0.00024222	0.00478642
ZBTB37	0.0776471	8.06618	0.000242237	0.00478642
SAXO5	-0.685371	-1.76321	0.000242393	0.00478698
TYMSOS	-0.51044	-2.03948	0.000242555	0.00478764
RND1	-0.438945	-1.07718	0.000242734	0.00478864
CACNG7	-0.69917	-1.73831	0.000243122	0.00479376
TH	-0.663492	-0.957098	0.000243325	0.00479522
RHPN2P1	-0.636705	-0.167686	0.000243591	0.00479629
OR2M3	-0.554521	-0.617027	0.000243637	0.00479629
CLEC1B	-0.189107	2.09397	0.000244208	0.0048008
WRNIP1	0.0574641	5.61254	0.000244238	0.0048008
PRDM14	-0.639373	-1.27319	0.000244252	0.0048008
NRSN1	-0.671804	-1.77751	0.000244649	0.00480485
TMEM52B	-0.54669	-1.63023	0.000244716	0.00480485
TBR1	-0.621253	-0.77228	0.00024505	0.00480886
ADAM18	-0.709712	-2.07859	0.000245273	0.0048096
KCTD16	-0.57499	-0.537714	0.000245375	0.0048096
MDH2	0.072669	4.13409	0.000245475	0.0048096
NXN	-0.520367	-0.393574	0.000246324	0.00482237
STAR	-0.593071	-1.92971	0.00024649	0.00482237
NDUFA4L2	-0.551017	-1.41683	0.000246515	0.00482237
MATK	0.129429	4.66493	0.00024711	0.00483149
PRRT4	-0.462086	-0.62802	0.000247576	0.00483805
NRXN3	-0.318826	1.70785	0.000247979	0.00484339
GRIP2	-0.651916	0.287894	0.000248338	0.00484786
CNTNAP4	-0.631869	-0.717618	0.000248596	0.00484961
CFAP99	-0.593345	-0.590103	0.000248688	0.00484961
SPA17	-0.262222	-0.41163	0.000248898	0.00485117
FADS6	-0.694509	-1.54426	0.000249155	0.00485363
C1S	-0.340999	0.242482	0.000249579	0.00485774
ANKS1B	-0.49733	0.413045	0.000249687	0.00485774
TRHDE-AS1	-0.411384	0.0583906	0.000249756	0.00485774
LINC01003	0.0852026	3.44828	0.000250299	0.00485945
LINC00682	-0.629839	-1.04215	0.000250512	0.00485945
C2CD3	0.0714196	5.71273	0.000250659	0.00485945
ACOT13	0.0753125	3.37454	0.000250741	0.00485945
TESPA1	0.0946903	5.82731	0.000250766	0.00485945
RNF17	-0.575297	0.162902	0.00025078	0.00485945
GABRA1	-0.706082	-1.61032	0.000250846	0.00485945
ACSBG2	-0.64924	-1.1663	0.000250945	0.00485945
CBLB	0.0946159	6.68005	0.000251018	0.00485945
DCHS2	-0.533475	0.760703	0.000251831	0.00487265
TBX18	-0.638279	-0.902458	0.000252148	0.00487625
LINC01971	-0.791285	-2.56456	0.000252402	0.00487863
MET	-0.541968	-0.460969	0.000252598	0.00487958
PLPPR5	-0.69862	-1.88202	0.000252713	0.00487958
ZNF438	0.100995	5.18393	0.000252993	0.00488246
TADA2B	0.0622118	6.09983	0.000253452	0.0048864
CDR2-DT	-0.43242	-1.63099	0.000253459	0.0048864
SNRNP35	0.0554927	4.75323	0.000254187	0.00489354
OR5K1	-0.730197	-2.40114	0.000254213	0.00489354
STAC2	-0.66726	-1.3241	0.000254263	0.00489354
SHANK1	-0.583455	0.55949	0.000254355	0.00489354
CACNA2D1	-0.640016	-0.669672	0.000254745	0.00489607
POTEI	-0.432418	-1.63367	0.000254757	0.00489607
IGFBP7	0.120701	3.57482	0.000254925	0.00489607
DNMT3L	-0.745006	-2.38412	0.000255012	0.00489607
LINC02011	-0.676664	-1.79797	0.000255153	0.00489626
SI	-0.755586	-1.89451	0.000255388	0.00489825
CDH15	-0.690627	-1.02904	0.000255797	0.00490357
MMP1	-0.36504	-0.92488	0.000256075	0.00490412
MUC2	-0.635633	0.627987	0.000256151	0.00490412
ABCC13	-0.213701	3.62581	0.00025622	0.00490412
BCLAF3	0.0774252	5.43522	0.000256582	0.00490522
UGT2B7	-0.847235	-2.89564	0.000256621	0.00490522
CRHR1	-0.662119	-1.76757	0.000256673	0.00490522
TJP1	-0.565968	0.391413	0.00025765	0.00491859
FBLIM1	-0.622934	-1.11286	0.00025776	0.00491859
ANO5	-0.167461	1.93315	0.000257769	0.00491859
GSG1L	-0.580755	-0.167339	0.000258412	0.00492835
PABPC4L	-0.801636	-2.44094	0.000258752	0.00493231
VCF2	-0.117953	1.99358	0.000259042	0.0049353
IGF1	-0.535002	-0.573424	0.000259513	0.00493961
GRB14	-0.26684	-0.114676	0.000259533	0.00493961
TOX2	-0.304113	-0.0660864	0.000259818	0.00494252
CDH5	-0.563039	-0.777579	0.000260372	0.00495052
WDR87BP	-0.649838	-1.20264	0.000260746	0.00495276
CYTIP	0.0891765	8.51302	0.000260755	0.00495276
ARHGAP15	0.110864	8.21656	0.000261374	0.00496145
ZBTB8B	-0.644286	-0.614666	0.000261661	0.00496145
UBOX5-AS1	-0.641281	-1.88132	0.000261895	0.00496145
CRYBG3	-0.0953806	5.38534	0.000261952	0.00496145
CPA2	-0.652615	-1.71709	0.000262071	0.00496145
PLEKHN1	-0.393625	-0.273836	0.000262168	0.00496145
TBRG1	0.0591343	6.43699	0.00026232	0.00496145
PRICKLE1	-0.134057	2.70647	0.000262416	0.00496145
SERPIND1	-0.655101	-2.19856	0.000262446	0.00496145
KHDRBS3	-0.422883	0.168199	0.000262544	0.00496145
SERTAD4BP	-0.500588	-1.08128	0.000262709	0.00496204
PA2G4P2	-0.580059	-2.14145	0.000263205	0.0049689
PPT2-EGFL8	-0.312624	-1.12362	0.000263416	0.00497037
GUCY2D	-0.391392	-0.211118	0.00026385	0.00497537
ATCAY	-0.692346	-1.16874	0.000263949	0.00497537
OTOGL	-0.620883	-0.38721	0.000264334	0.00497738
SMIM44	-0.79368	-2.69807	0.000264399	0.00497738
ATP8B1	-0.567007	-0.268578	0.000264542	0.00497738
C1orf174	0.0543479	4.37038	0.000264779	0.00497738
PLXNC1	0.0934741	9.31709	0.000264844	0.00497738
HDHD3	0.0898114	2.50431	0.000264857	0.00497738
DPYSL2	-0.105237	6.29778	0.000265605	0.00498894
DNAJC22	-0.66294	-1.31733	0.000266375	0.00500087
FERMT1	-0.585505	-0.816981	0.000266859	0.00500744
SLC5A12	-0.65902	-1.12235	0.000267024	0.00500801
RPL21P129	-0.923707	-3.07266	0.000267394	0.00501243
TTPA	-0.675685	-1.96236	0.000267695	0.00501554
LILRB5	-0.42409	-0.585103	0.00026792	0.00501661
FLRT1	-0.687676	-1.98324	0.000268021	0.00501661
MELTF	-0.353549	0.906683	0.000268427	0.00502168
MAS1	-0.640835	-1.12089	0.000269196	0.00503354
EP300-AS1	-0.718615	-2.67897	0.000269461	0.00503355
LDLRAD2	-0.446842	-0.746465	0.000269466	0.00503355
ESRRG	-0.641803	-0.701797	0.000269734	0.00503602
ZNF774	-0.277319	-0.294982	0.000269924	0.00503705
FOXL2	-0.66214	-1.47803	0.000270606	0.00504512
FOXA3	-0.602532	-1.8563	0.000270671	0.00504512
[truncated: 35,267 more rows]
