# Supplementary material
Source: Research Square preprint supplement (doi:10.21203/rs.3.rs-9074426/v1)
Supplement: Supplementary file 3 [file a2380f6a8ab9b19ed6577c07.xlsx]

## Sheet: Pre-clinical Stage
microRNA	Target	microRNA.Direction	Corr.Coefficient	Corr.P.Value	Corr.Adjusted.P.Val
hsa-let-7a-3p	ANTXR1	downregulated	-0.588626	5.94141e-243	2.29555e-242
hsa-let-7a-3p	ARHGAP44	downregulated	-0.788603	0	0
hsa-let-7a-3p	BDNF	downregulated	-0.672554	0	0
hsa-let-7a-3p	CACNA1C	downregulated	-0.724668	0	0
hsa-let-7a-3p	CALN1	downregulated	-0.725062	0	0
hsa-let-7a-3p	CLDN1	downregulated	-0.676816	0	0
hsa-let-7a-3p	COL12A1	downregulated	-0.619754	1.81231e-276	7.77929e-276
hsa-let-7a-3p	DCLK3	downregulated	-0.665601	0	0
hsa-let-7a-3p	DRD1	downregulated	-0.551033	4.795e-207	1.66995e-206
hsa-let-7a-3p	FGF7	downregulated	-0.616014	3.05221e-272	1.29338e-271
hsa-let-7a-3p	GABRB3	downregulated	-0.609374	7.07561e-265	2.92654e-264
hsa-let-7a-3p	GPR158	downregulated	-0.854076	0	0
hsa-let-7a-3p	GRIN2A	downregulated	-0.504775	1.04271e-168	3.25938e-168
hsa-let-7a-3p	HMGA2	downregulated	-0.530743	1.70415e-189	5.68586e-189
hsa-let-7a-3p	HS6ST2	downregulated	-0.520615	3.57673e-181	1.15883e-180
hsa-let-7a-3p	IRX3	downregulated	-0.560506	1.16034e-215	4.13812e-215
hsa-let-7a-3p	LIPG	downregulated	-0.661108	0	0
hsa-let-7a-3p	LRP2	downregulated	-0.620759	1.29507e-277	5.58771e-277
hsa-let-7a-3p	MARK1	downregulated	-0.721738	0	0
hsa-let-7a-3p	MEX3B	downregulated	-0.786299	0	0
hsa-let-7a-3p	NOTCH3	downregulated	-0.723315	0	0
hsa-let-7a-3p	NPY	downregulated	-0.508509	1.37607e-171	4.3355e-171
hsa-let-7a-3p	PCDH8	downregulated	-0.547348	9.08611e-204	3.13148e-203
hsa-let-7a-3p	PDE10A	downregulated	-0.533207	1.45523e-191	4.88098e-191
hsa-let-7a-3p	POU4F2	downregulated	-0.539145	1.28618e-196	4.36369e-196
hsa-let-7a-3p	SLC1A2	downregulated	-0.723268	0	0
hsa-let-7a-3p	SLC34A2	downregulated	-0.501753	2.10062e-166	6.50359e-166
hsa-let-7a-3p	SLC6A17	downregulated	-0.54617	9.93882e-203	3.41573e-202
hsa-let-7a-3p	SMOC1	downregulated	-0.791593	0	0
hsa-let-7a-3p	SOX11	downregulated	-0.567284	5.32073e-222	1.93354e-221
hsa-let-7a-3p	SP8	downregulated	-0.501239	5.15374e-166	1.59344e-165
hsa-let-7a-3p	TCERG1L	downregulated	-0.722008	0	0
hsa-let-7a-3p	TEAD1	downregulated	-0.52317	3.02703e-183	9.91441e-183
hsa-let-7a-3p	UNC79	downregulated	-0.771354	0	0
hsa-let-7f-1-3p	ABI3BP	downregulated	-0.695914	0	0
hsa-let-7f-1-3p	ADH1B	downregulated	-0.502251	8.79113e-167	2.72867e-166
hsa-let-7f-1-3p	ALDH1A3	downregulated	-0.507114	1.65655e-170	5.21092e-170
hsa-let-7f-1-3p	ANO1	downregulated	-0.50366	7.43234e-168	2.31414e-167
hsa-let-7f-1-3p	ANO4	downregulated	-0.601911	8.36847e-257	3.37863e-256
hsa-let-7f-1-3p	ANTXR1	downregulated	-0.816267	0	0
hsa-let-7f-1-3p	ART3	downregulated	-0.659468	0	0
hsa-let-7f-1-3p	BDNF	downregulated	-0.904469	0	0
hsa-let-7f-1-3p	CACNA1C	downregulated	-0.953601	0	0
hsa-let-7f-1-3p	CALN1	downregulated	-0.951467	0	0
hsa-let-7f-1-3p	CBLN4	downregulated	-0.552224	4.09358e-208	1.431e-207
hsa-let-7f-1-3p	CFTR	downregulated	-0.680911	0	0
hsa-let-7f-1-3p	CLDN1	downregulated	-0.563281	3.07164e-218	1.10236e-217
hsa-let-7f-1-3p	COL12A1	downregulated	-0.847585	0	0
hsa-let-7f-1-3p	COL1A2	downregulated	-0.586145	1.95035e-240	7.48631e-240
hsa-let-7f-1-3p	DCLK3	downregulated	-0.89506	0	0
hsa-let-7f-1-3p	DLX2	downregulated	-0.629463	1.03324e-287	4.57984e-287
hsa-let-7f-1-3p	EBF3	downregulated	-0.722593	0	0
hsa-let-7f-1-3p	EGFL6	downregulated	-0.629931	2.89417e-288	1.28463e-287
hsa-let-7f-1-3p	EML1	downregulated	-0.694302	0	0
hsa-let-7f-1-3p	EMP2	downregulated	-0.518319	2.51882e-179	8.1095e-179
hsa-let-7f-1-3p	FGF7	downregulated	-0.77535	0	0
hsa-let-7f-1-3p	FOXD3	downregulated	-0.656335	0	0
hsa-let-7f-1-3p	GABRB3	downregulated	-0.839204	0	0
hsa-let-7f-1-3p	GPR158	downregulated	-0.890659	0	0
hsa-let-7f-1-3p	GREM1	downregulated	-0.599761	1.61589e-254	6.49093e-254
hsa-let-7f-1-3p	GRM5	downregulated	-0.657979	0	0
hsa-let-7f-1-3p	HTR2A	downregulated	-0.552994	8.30712e-209	2.90777e-208
hsa-let-7f-1-3p	IGFBP1	downregulated	-0.718898	0	0
hsa-let-7f-1-3p	IRX3	downregulated	-0.601944	7.70096e-257	3.10993e-256
hsa-let-7f-1-3p	JPH1	downregulated	-0.500521	1.79802e-165	5.5505e-165
hsa-let-7f-1-3p	KIAA1217	downregulated	-0.69462	0	0
hsa-let-7f-1-3p	LIPG	downregulated	-0.890334	0	0
hsa-let-7f-1-3p	LRP2	downregulated	-0.848769	0	0
hsa-let-7f-1-3p	MARK1	downregulated	-0.950419	0	0
hsa-let-7f-1-3p	MEX3B	downregulated	-0.945405	0	0
hsa-let-7f-1-3p	MYT1L	downregulated	-0.591259	1.20246e-245	4.68918e-245
hsa-let-7f-1-3p	NEUROG2	downregulated	-0.515967	1.90324e-177	6.10289e-177
hsa-let-7f-1-3p	NKX2-8	downregulated	-0.601602	1.78735e-256	7.20335e-256
hsa-let-7f-1-3p	NOTCH3	downregulated	-0.952337	0	0
hsa-let-7f-1-3p	NPY	downregulated	-0.580688	5.60327e-235	2.11906e-234
hsa-let-7f-1-3p	NR2F2	downregulated	-0.50463	1.34773e-168	4.20951e-168
hsa-let-7f-1-3p	PCDH11Y	downregulated	-0.759802	0	0
hsa-let-7f-1-3p	PCDH19	downregulated	-0.686325	0	0
hsa-let-7f-1-3p	PCDH8	downregulated	-0.625869	1.66967e-283	7.30509e-283
hsa-let-7f-1-3p	PCSK2	downregulated	-0.661697	0	0
hsa-let-7f-1-3p	PDE10A	downregulated	-0.760616	0	0
hsa-let-7f-1-3p	PDE11A	downregulated	-0.565008	7.43275e-220	2.68082e-219
hsa-let-7f-1-3p	PDZRN3	downregulated	-0.553963	1.11052e-209	3.89835e-209
hsa-let-7f-1-3p	PEX5L	downregulated	-0.720271	0	0
hsa-let-7f-1-3p	PRDM12	downregulated	-0.690625	0	0
hsa-let-7f-1-3p	PRDM16	downregulated	-0.847632	0	0
hsa-let-7f-1-3p	RS1	downregulated	-0.578718	4.94867e-233	1.86219e-232
hsa-let-7f-1-3p	SIX3	downregulated	-0.555291	6.94864e-211	2.45278e-210
hsa-let-7f-1-3p	SLC1A2	downregulated	-0.951958	0	0
hsa-let-7f-1-3p	SLC34A2	downregulated	-0.730208	0	0
hsa-let-7f-1-3p	SLC6A17	downregulated	-0.775566	0	0
hsa-let-7f-1-3p	SMOC1	downregulated	-0.945373	0	0
hsa-let-7f-1-3p	SOX11	downregulated	-0.718737	0	0
hsa-let-7f-1-3p	TCERG1L	downregulated	-0.951814	0	0
hsa-let-7f-1-3p	TFAP2B	downregulated	-0.620707	1.48688e-277	6.41007e-277
hsa-let-7f-1-3p	UNC79	downregulated	-0.947284	0	0
hsa-let-7f-1-3p	WNT5A	downregulated	-0.511364	8.18747e-174	2.59657e-173
hsa-miR-101-3p	ADAMTSL3	downregulated	-0.729795	0	0
hsa-miR-101-3p	CAV3	downregulated	-0.53592	7.35398e-194	2.4823e-193
hsa-miR-101-3p	DKK1	downregulated	-0.556796	2.96185e-212	1.04829e-211
hsa-miR-101-3p	EMP2	downregulated	-0.552725	1.45095e-208	5.07768e-208
hsa-miR-101-3p	GJA1	downregulated	-0.742369	0	0
hsa-miR-101-3p	GPR50	downregulated	-0.584823	4.19158e-239	1.60195e-238
hsa-miR-101-3p	GRIK3	downregulated	-0.533185	1.52106e-191	5.10067e-191
hsa-miR-101-3p	HAS2	downregulated	-0.551185	3.50101e-207	1.2201e-206
hsa-miR-101-3p	ID4	downregulated	-0.559535	9.1288e-215	3.24541e-214
hsa-miR-101-3p	KCNB2	downregulated	-0.550093	3.31205e-206	1.15071e-205
hsa-miR-101-3p	LINC00943	downregulated	-0.747976	0	0
hsa-miR-101-3p	MNX1	downregulated	-0.817857	0	0
hsa-miR-101-3p	MYRIP	downregulated	-0.718095	0	0
hsa-miR-101-3p	NKX3-2	downregulated	-0.716225	0	0
hsa-miR-101-3p	NR2F2	downregulated	-0.519216	4.80026e-180	1.54893e-179
hsa-miR-101-3p	PCDH8	downregulated	-0.874478	0	0
hsa-miR-101-3p	PURG	downregulated	-0.801077	0	0
hsa-miR-101-3p	RARB	downregulated	-0.648393	0	0
hsa-miR-101-3p	RASD2	downregulated	-0.518689	1.27353e-179	4.10189e-179
hsa-miR-101-3p	SHANK2	downregulated	-0.690811	0	0
hsa-miR-101-3p	SOX11	downregulated	-0.822264	0	0
hsa-miR-101-3p	SOX9	downregulated	-0.500131	3.54258e-165	1.09233e-164
hsa-miR-101-3p	TSPAN12	downregulated	-0.875979	0	0
hsa-miR-101-3p	UNC79	downregulated	-0.521514	6.7083e-182	2.18411e-181
hsa-miR-10399-5p	ALDH1A3	downregulated	-0.666634	0	0
hsa-miR-10399-5p	CNTN4	downregulated	-0.536876	1.12728e-194	3.80831e-194
hsa-miR-10399-5p	SHANK2	downregulated	-0.612943	8.19278e-269	3.42155e-268
hsa-miR-10399-5p	SV2B	downregulated	-0.615155	2.80215e-271	1.18301e-270
hsa-miR-10399-5p	TRPM3	downregulated	-0.682525	0	0
hsa-miR-106a-3p	ABI3BP	downregulated	-0.851435	0	0
hsa-miR-106a-3p	ADAM7	downregulated	-0.756427	0	0
hsa-miR-106a-3p	ADAMTSL1	downregulated	-0.81097	0	0
hsa-miR-106a-3p	ADCYAP1	downregulated	-0.857546	0	0
hsa-miR-106a-3p	ADGRF5	downregulated	-0.717191	0	0
hsa-miR-106a-3p	AFM	downregulated	-0.758967	0	0
hsa-miR-106a-3p	BMP7	downregulated	-0.798827	0	0
hsa-miR-106a-3p	C11orf87	downregulated	-0.665813	0	0
hsa-miR-106a-3p	C18orf63	downregulated	-0.796721	0	0
hsa-miR-106a-3p	CLGN	downregulated	-0.906875	0	0
hsa-miR-106a-3p	CNGB3	downregulated	-0.711704	0	0
hsa-miR-106a-3p	CRISP1	downregulated	-0.57775	4.41138e-232	1.65336e-231
hsa-miR-106a-3p	CSRNP3	downregulated	-0.704136	0	0
hsa-miR-106a-3p	FBXL2	downregulated	-0.636022	1.54098e-295	6.97039e-295
hsa-miR-106a-3p	FOXQ1	downregulated	-0.756274	0	0
hsa-miR-106a-3p	GATA6	downregulated	-0.850667	0	0
hsa-miR-106a-3p	GJA1	downregulated	-0.687175	0	0
hsa-miR-106a-3p	GP2	downregulated	-0.729335	0	0
hsa-miR-106a-3p	IGF2BP1	downregulated	-0.791238	0	0
hsa-miR-106a-3p	INSYN2A	downregulated	-0.606319	1.51523e-261	6.21696e-261
hsa-miR-106a-3p	KCNA1	downregulated	-0.750215	0	0
hsa-miR-106a-3p	KSR2	downregulated	-0.842229	0	0
hsa-miR-106a-3p	LECT2	downregulated	-0.760426	0	0
hsa-miR-106a-3p	NEUROD4	downregulated	-0.84982	0	0
hsa-miR-106a-3p	NOX5	downregulated	-0.610053	1.27417e-265	5.28106e-265
hsa-miR-106a-3p	NTRK2	downregulated	-0.851772	0	0
hsa-miR-106a-3p	OTUD6A	downregulated	-0.812482	0	0
hsa-miR-106a-3p	PCDH19	downregulated	-0.84674	0	0
hsa-miR-106a-3p	PDE10A	downregulated	-0.760703	0	0
hsa-miR-106a-3p	PDE11A	downregulated	-0.794232	0	0
hsa-miR-106a-3p	PLA2R1	downregulated	-0.816033	0	0
hsa-miR-106a-3p	PLEKHS1	downregulated	-0.769811	0	0
hsa-miR-106a-3p	PREX2	downregulated	-0.806836	0	0
hsa-miR-106a-3p	PRND	downregulated	-0.719709	0	0
hsa-miR-106a-3p	PROX1	downregulated	-0.76911	0	0
hsa-miR-106a-3p	PRR23A	downregulated	-0.666513	0	0
hsa-miR-106a-3p	PTCHD4	downregulated	-0.74276	0	0
hsa-miR-106a-3p	PURG	downregulated	-0.848189	0	0
hsa-miR-106a-3p	RNF128	downregulated	-0.719979	0	0
hsa-miR-106a-3p	SHANK2	downregulated	-0.915147	0	0
hsa-miR-106a-3p	SLC12A1	downregulated	-0.916937	0	0
hsa-miR-106a-3p	SLC17A6	downregulated	-0.59098	2.32753e-245	9.06768e-245
hsa-miR-106a-3p	SLC28A2	downregulated	-0.863559	0	0
hsa-miR-106a-3p	SLC39A12	downregulated	-0.731555	0	0
hsa-miR-106a-3p	SLC5A7	downregulated	-0.793304	0	0
hsa-miR-106a-3p	SLC7A14	downregulated	-0.719394	0	0
hsa-miR-106a-3p	SNAP25	downregulated	-0.79705	0	0
hsa-miR-106a-3p	SOX1	downregulated	-0.80203	0	0
hsa-miR-106a-3p	SOX11	downregulated	-0.793043	0	0
hsa-miR-106a-3p	SOX9	downregulated	-0.862261	0	0
hsa-miR-106a-3p	SPPL2C	downregulated	-0.785917	0	0
hsa-miR-106a-3p	SSTR2	downregulated	-0.735922	0	0
hsa-miR-106a-3p	TBX15	downregulated	-0.759914	0	0
hsa-miR-106a-3p	TDRD6	downregulated	-0.853827	0	0
hsa-miR-106a-3p	TMEM215	downregulated	-0.735118	0	0
hsa-miR-106a-3p	TOX3	downregulated	-0.710046	0	0
hsa-miR-106a-3p	UNC5D	downregulated	-0.613882	7.39296e-270	3.10219e-269
hsa-miR-106a-3p	WIPF3	downregulated	-0.855379	0	0
hsa-miR-106a-3p	WNT5A	downregulated	-0.870793	0	0
hsa-miR-106a-3p	ZIC3	downregulated	-0.877975	0	0
hsa-miR-106b-5p	EPB41L4B	downregulated	-0.520991	1.77708e-181	5.76816e-181
hsa-miR-106b-5p	GATA6	downregulated	-0.502357	7.30309e-167	2.26724e-166
hsa-miR-106b-5p	HMGA2	downregulated	-0.521553	6.23379e-182	2.03004e-181
hsa-miR-106b-5p	HSPA4L	downregulated	-0.523564	1.44343e-183	4.73448e-183
hsa-miR-106b-5p	KIF26B	downregulated	-0.523482	1.68401e-183	5.52246e-183
hsa-miR-106b-5p	MYT1L	downregulated	-0.523254	2.58554e-183	8.47189e-183
hsa-miR-106b-5p	PCDHA3	downregulated	-0.500494	1.88511e-165	5.81708e-165
hsa-miR-106b-5p	SCN1A	downregulated	-0.520678	3.18287e-181	1.03206e-180
hsa-miR-106b-5p	SHANK2	downregulated	-0.531715	2.61712e-190	8.74667e-190
hsa-miR-106b-5p	SV2B	downregulated	-0.536944	9.87295e-195	3.33682e-194
hsa-miR-126-3p	ADAMTS2	downregulated	-0.587134	1.95089e-241	7.50107e-241
hsa-miR-126-3p	CFAP61	downregulated	-0.533236	1.37598e-191	4.61611e-191
hsa-miR-126-3p	FARP1	downregulated	-0.533175	1.54958e-191	5.19522e-191
hsa-miR-126-3p	FERMT1	downregulated	-0.506225	8.03191e-170	2.51958e-169
hsa-miR-126-3p	HEPHL1	downregulated	-0.521634	5.35834e-182	1.74602e-181
hsa-miR-126-3p	ITIH5	downregulated	-0.504633	1.33988e-168	4.18582e-168
hsa-miR-126-3p	KIAA1549	downregulated	-0.532967	2.3184e-191	7.77118e-191
hsa-miR-126-3p	NFASC	downregulated	-0.529585	1.57383e-188	5.23458e-188
hsa-miR-126-3p	UCHL1	downregulated	-0.601616	1.72453e-256	6.95192e-256
hsa-miR-126-5p	A2ML1	downregulated	-0.538258	7.41919e-196	2.51392e-195
hsa-miR-126-5p	ABRA	downregulated	-0.656366	0	0
hsa-miR-126-5p	ADAMTSL1	downregulated	-0.755615	0	0
hsa-miR-126-5p	ADCYAP1	downregulated	-0.810751	0	0
hsa-miR-126-5p	BTC	downregulated	-0.640823	2.17617e-301	9.99427e-301
hsa-miR-126-5p	C11orf87	downregulated	-0.640169	1.38446e-300	6.34543e-300
hsa-miR-126-5p	C2CD4A	downregulated	-0.879115	0	0
hsa-miR-126-5p	CAMK2A	downregulated	-0.710724	0	0
hsa-miR-126-5p	CSRNP3	downregulated	-0.679752	0	0
hsa-miR-126-5p	CXCL12	downregulated	-0.834814	0	0
hsa-miR-126-5p	CYP39A1	downregulated	-0.722537	0	0
hsa-miR-126-5p	DCX	downregulated	-0.755465	0	0
hsa-miR-126-5p	DLK1	downregulated	-0.692456	0	0
hsa-miR-126-5p	DSPP	downregulated	-0.69884	0	0
hsa-miR-126-5p	F9	downregulated	-0.772581	0	0
hsa-miR-126-5p	FAT3	downregulated	-0.808157	0	0
hsa-miR-126-5p	FAXC	downregulated	-0.81869	0	0
hsa-miR-126-5p	FGF7	downregulated	-0.725899	0	0
hsa-miR-126-5p	GABRA4	downregulated	-0.605801	5.5088e-261	2.25793e-260
hsa-miR-126-5p	GABRA5	downregulated	-0.826302	0	0
hsa-miR-126-5p	GHR	downregulated	-0.745172	0	0
hsa-miR-126-5p	GNG12	downregulated	-0.662067	0	0
hsa-miR-126-5p	HOXB5	downregulated	-0.843068	0	0
hsa-miR-126-5p	HOXC8	downregulated	-0.612044	8.12642e-268	3.38939e-267
hsa-miR-126-5p	HSPB8	downregulated	-0.640292	9.7813e-301	4.48698e-300
hsa-miR-126-5p	IL17A	downregulated	-0.572545	5.06449e-227	1.86992e-226
hsa-miR-126-5p	JPH1	downregulated	-0.686917	0	0
hsa-miR-126-5p	KIRREL1	downregulated	-0.597497	3.9556e-252	1.57658e-251
hsa-miR-126-5p	KLF17	downregulated	-0.618901	1.68666e-275	7.2282e-275
hsa-miR-126-5p	LRCH2	downregulated	-0.687369	0	0
hsa-miR-126-5p	LRRC55	downregulated	-0.75001	0	0
hsa-miR-126-5p	PAX2	downregulated	-0.796273	0	0
hsa-miR-126-5p	PDZRN4	downregulated	-0.720571	0	0
hsa-miR-126-5p	PEX5L	downregulated	-0.533797	4.63177e-192	1.55616e-191
hsa-miR-126-5p	PKHD1	downregulated	-0.860045	0	0
hsa-miR-126-5p	PNLIPRP3	downregulated	-0.828697	0	0
hsa-miR-126-5p	PRRX1	downregulated	-0.763755	0	0
hsa-miR-126-5p	RFX4	downregulated	-0.62735	3.12757e-285	1.37518e-284
hsa-miR-126-5p	RGR	downregulated	-0.629093	2.81803e-287	1.24805e-286
hsa-miR-126-5p	SCEL	downregulated	-0.700625	0	0
hsa-miR-126-5p	SHISAL1	downregulated	-0.78793	0	0
hsa-miR-126-5p	SLC17A8	downregulated	-0.833523	0	0
hsa-miR-126-5p	SLC6A2	downregulated	-0.832636	0	0
hsa-miR-126-5p	SLC7A14	downregulated	-0.692163	0	0
hsa-miR-126-5p	ST8SIA3	downregulated	-0.700633	0	0
hsa-miR-126-5p	STC1	downregulated	-0.778765	0	0
hsa-miR-126-5p	STEAP2	downregulated	-0.692209	0	0
hsa-miR-126-5p	TMEM100	downregulated	-0.830331	0	0
hsa-miR-126-5p	TNFAIP8L3	downregulated	-0.72335	0	0
hsa-miR-126-5p	UNC5D	downregulated	-0.590639	5.21238e-245	2.02817e-244
hsa-miR-126-5p	ZIC2	downregulated	-0.872063	0	0
hsa-miR-126-5p	ZIC5	downregulated	-0.730281	0	0
hsa-miR-1278	ADCYAP1	downregulated	-0.770991	0	0
hsa-miR-1278	ADGRF1	downregulated	-0.554328	5.19186e-210	1.82536e-209
hsa-miR-1278	AIPL1	downregulated	-0.826445	0	0
hsa-miR-1278	ATP6V1C2	downregulated	-0.66005	0	0
hsa-miR-1278	BDNF	downregulated	-0.542284	2.49027e-199	8.48689e-199
hsa-miR-1278	BEND6	downregulated	-0.868293	0	0
hsa-miR-1278	C11orf87	downregulated	-0.681291	0	0
hsa-miR-1278	CACNB2	downregulated	-0.526909	2.60048e-186	8.59884e-186
hsa-miR-1278	CASQ2	downregulated	-0.744402	0	0
hsa-miR-1278	CLRN1	downregulated	-0.638308	2.60576e-298	1.18678e-297
hsa-miR-1278	CNTN4	downregulated	-0.738155	0	0
hsa-miR-1278	CRISP1	downregulated	-0.670132	0	0
hsa-miR-1278	CSRNP3	downregulated	-0.712277	0	0
hsa-miR-1278	CYP26B1	downregulated	-0.780224	0	0
hsa-miR-1278	DNAH5	downregulated	-0.553453	3.20599e-209	1.12443e-208
hsa-miR-1278	EDIL3	downregulated	-0.923146	0	0
hsa-miR-1278	FAM216B	downregulated	-0.69909	0	0
hsa-miR-1278	FARP1	downregulated	-0.925403	0	0
hsa-miR-1278	FGF23	downregulated	-0.622335	2.02849e-279	8.77596e-279
hsa-miR-1278	FMO3	downregulated	-0.799753	0	0
hsa-miR-1278	FRAS1	downregulated	-0.545503	3.83583e-202	1.31657e-201
hsa-miR-1278	GABRA4	downregulated	-0.653496	0	0
hsa-miR-1278	GFRA1	downregulated	-0.735183	0	0
hsa-miR-1278	GLDN	downregulated	-0.926581	0	0
hsa-miR-1278	GOLGA8G	downregulated	-0.665974	0	0
hsa-miR-1278	GPR158	downregulated	-0.572526	5.27553e-227	1.94739e-226
hsa-miR-1278	GPR22	downregulated	-0.816891	0	0
hsa-miR-1278	GRIK3	downregulated	-0.645647	2.25921e-307	1.05618e-306
hsa-miR-1278	HAS2	downregulated	-0.775013	0	0
hsa-miR-1278	HOXB13	downregulated	-0.847037	0	0
hsa-miR-1278	HOXC9	downregulated	-0.663348	0	0
hsa-miR-1278	HOXD13	downregulated	-0.658047	0	0
hsa-miR-1278	HS6ST3	downregulated	-0.704126	0	0
hsa-miR-1278	HSPB8	downregulated	-0.668734	0	0
hsa-miR-1278	IL17RD	downregulated	-0.742271	0	0
hsa-miR-1278	KIAA1549L	downregulated	-0.55395	1.13955e-209	3.99938e-209
hsa-miR-1278	KRTAP5-8	downregulated	-0.609042	1.63482e-264	6.75298e-264
hsa-miR-1278	LRTM2	downregulated	-0.762794	0	0
hsa-miR-1278	MN1	downregulated	-0.927561	0	0
hsa-miR-1278	MSX2	downregulated	-0.717142	0	0
hsa-miR-1278	MYO5B	downregulated	-0.662096	0	0
hsa-miR-1278	MYOM3	downregulated	-0.770432	0	0
hsa-miR-1278	MYRIP	downregulated	-0.845466	0	0
hsa-miR-1278	MYT1L	downregulated	-0.899443	0	0
hsa-miR-1278	NEUROD4	downregulated	-0.92728	0	0
hsa-miR-1278	NKAIN4	downregulated	-0.912169	0	0
hsa-miR-1278	NPAP1	downregulated	-0.684017	0	0
hsa-miR-1278	NTRK2	downregulated	-0.926869	0	0
hsa-miR-1278	ONECUT1	downregulated	-0.80786	0	0
hsa-miR-1278	OSMR	downregulated	-0.802959	0	0
hsa-miR-1278	PAK5	downregulated	-0.806474	0	0
hsa-miR-1278	PAPPA	downregulated	-0.603474	1.77684e-258	7.23248e-258
hsa-miR-1278	PCDH11Y	downregulated	-0.615379	1.5735e-271	6.65003e-271
hsa-miR-1278	PCDH8	downregulated	-0.909536	0	0
hsa-miR-1278	PEX5L	downregulated	-0.605327	1.79372e-260	7.34067e-260
hsa-miR-1278	PKNOX2	downregulated	-0.72882	0	0
hsa-miR-1278	PPP1R3C	downregulated	-0.712547	0	0
hsa-miR-1278	PRIMA1	downregulated	-0.688852	0	0
hsa-miR-1278	PTPN14	downregulated	-0.64889	0	0
hsa-miR-1278	PTPN21	downregulated	-0.562775	9.09033e-218	3.25943e-217
hsa-miR-1278	RBM46	downregulated	-0.755986	0	0
hsa-miR-1278	SCN1A	downregulated	-0.898517	0	0
hsa-miR-1278	SEMA6D	downregulated	-0.574857	2.93659e-229	1.09135e-228
hsa-miR-1278	SERPINB5	downregulated	-0.624024	2.29885e-281	1.00001e-280
hsa-miR-1278	SGCG	downregulated	-0.667435	0	0
hsa-miR-1278	SH3GL2	downregulated	-0.873658	0	0
hsa-miR-1278	SIM1	downregulated	-0.754071	0	0
hsa-miR-1278	SLC12A1	downregulated	-0.89022	0	0
hsa-miR-1278	SLC1A2	downregulated	-0.652329	0	0
hsa-miR-1278	SLC7A2	downregulated	-0.523334	2.2238e-183	7.28809e-183
hsa-miR-1278	SLITRK2	downregulated	-0.61057	3.43536e-266	1.42721e-265
hsa-miR-1278	SNAI2	downregulated	-0.729786	0	0
hsa-miR-1278	SOX11	downregulated	-0.894404	0	0
hsa-miR-1278	SPSB4	downregulated	-0.88658	0	0
hsa-miR-1278	SRD5A2	downregulated	-0.922747	0	0
hsa-miR-1278	ST8SIA3	downregulated	-0.702757	0	0
hsa-miR-1278	STC2	downregulated	-0.730884	0	0
hsa-miR-1278	STEAP2	downregulated	-0.814648	0	0
hsa-miR-1278	STXBP5L	downregulated	-0.747711	0	0
hsa-miR-1278	TACC2	downregulated	-0.722117	0	0
hsa-miR-1278	TEAD1	downregulated	-0.879517	0	0
hsa-miR-1278	TENT5D	downregulated	-0.688622	0	0
hsa-miR-1278	TFAP2C	downregulated	-0.627126	5.70808e-285	2.50774e-284
hsa-miR-1278	THSD4	downregulated	-0.783977	0	0
hsa-miR-1278	UCHL1	downregulated	-0.788277	0	0
hsa-miR-1278	UNC13C	downregulated	-0.924426	0	0
hsa-miR-1278	VEGFD	downregulated	-0.837032	0	0
hsa-miR-1278	VGLL1	downregulated	-0.615033	3.83901e-271	1.61988e-270
hsa-miR-1278	WNT5A	downregulated	-0.795899	0	0
hsa-miR-1278	ZNF750	downregulated	-0.625941	1.37609e-283	6.0223e-283
hsa-miR-1299	ADAM21	upregulated	-0.943529	0	0
hsa-miR-1299	ADAMTS2	upregulated	-0.878605	0	0
hsa-miR-1299	ADCY2	upregulated	-0.849901	0	0
hsa-miR-1299	ADGRF1	upregulated	-0.510912	1.85074e-173	5.86357e-173
hsa-miR-1299	AGTR1	upregulated	-0.658513	0	0
hsa-miR-1299	AIPL1	upregulated	-0.787293	0	0
hsa-miR-1299	ANTXR1	upregulated	-0.756199	0	0
hsa-miR-1299	ARC	upregulated	-0.810859	0	0
hsa-miR-1299	ARHGAP28	upregulated	-0.896696	0	0
hsa-miR-1299	B3GALT1	upregulated	-0.936457	0	0
hsa-miR-1299	BEND6	upregulated	-0.818057	0	0
hsa-miR-1299	BOC	upregulated	-0.82618	0	0
hsa-miR-1299	C17orf78	upregulated	-0.876922	0	0
hsa-miR-1299	C1QTNF1	upregulated	-0.727301	0	0
hsa-miR-1299	C2CD4A	upregulated	-0.862847	0	0
hsa-miR-1299	CALN1	upregulated	-0.554847	1.75939e-210	6.19666e-210
hsa-miR-1299	CCDC140	upregulated	-0.826929	0	0
hsa-miR-1299	CCDC158	upregulated	-0.901151	0	0
hsa-miR-1299	CCKBR	upregulated	-0.736072	0	0
hsa-miR-1299	CDH3	upregulated	-0.910666	0	0
hsa-miR-1299	CEMIP	upregulated	-0.952388	0	0
hsa-miR-1299	CHD5	upregulated	-0.852684	0	0
hsa-miR-1299	COL4A6	upregulated	-0.899696	0	0
hsa-miR-1299	CSRNP3	upregulated	-0.770349	0	0
hsa-miR-1299	CYP11B1	upregulated	-0.895196	0	0
hsa-miR-1299	CYP26A1	upregulated	-0.81093	0	0
hsa-miR-1299	CYP27C1	upregulated	-0.793116	0	0
hsa-miR-1299	DCX	upregulated	-0.839924	0	0
hsa-miR-1299	DLGAP2	upregulated	-0.556733	3.38086e-212	1.19606e-211
hsa-miR-1299	DLX3	upregulated	-0.877407	0	0
hsa-miR-1299	DRD1	upregulated	-0.804111	0	0
hsa-miR-1299	EFEMP1	upregulated	-0.797039	0	0
hsa-miR-1299	ELOVL2	upregulated	-0.836884	0	0
hsa-miR-1299	ENTPD3	upregulated	-0.899782	0	0
hsa-miR-1299	EPHA10	upregulated	-0.674614	0	0
hsa-miR-1299	FAT3	upregulated	-0.886541	0	0
hsa-miR-1299	FRAS1	upregulated	-0.506264	7.49162e-170	2.35102e-169
hsa-miR-1299	FRG2	upregulated	-0.760967	0	0
hsa-miR-1299	FRG2C	upregulated	-0.743429	0	0
hsa-miR-1299	FSD2	upregulated	-0.784038	0	0
hsa-miR-1299	FZD4	upregulated	-0.55449	3.70109e-210	1.30181e-209
hsa-miR-1299	GABBR2	upregulated	-0.844217	0	0
hsa-miR-1299	GABRE	upregulated	-0.542073	3.79352e-199	1.29229e-198
hsa-miR-1299	GATA6	upregulated	-0.897077	0	0
hsa-miR-1299	GFRA1	upregulated	-0.825914	0	0
hsa-miR-1299	GNG12	upregulated	-0.758533	0	0
hsa-miR-1299	GRM6	upregulated	-0.904541	0	0
hsa-miR-1299	HCN4	upregulated	-0.757364	0	0
hsa-miR-1299	HMX2	upregulated	-0.879474	0	0
hsa-miR-1299	HOXC10	upregulated	-0.807458	0	0
hsa-miR-1299	HOXD1	upregulated	-0.756416	0	0
hsa-miR-1299	HOXD9	upregulated	-0.758482	0	0
hsa-miR-1299	HS3ST2	upregulated	-0.814874	0	0
hsa-miR-1299	HS6ST3	upregulated	-0.808353	0	0
hsa-miR-1299	HTR4	upregulated	-0.770214	0	0
hsa-miR-1299	HUNK	upregulated	-0.555617	3.51796e-211	1.24262e-210
hsa-miR-1299	IBSP	upregulated	-0.676312	0	0
hsa-miR-1299	IGDCC3	upregulated	-0.60316	3.85282e-258	1.56625e-257
hsa-miR-1299	IL17A	upregulated	-0.560282	1.86891e-215	6.65764e-215
hsa-miR-1299	IL17RD	upregulated	-0.753575	0	0
hsa-miR-1299	ITGA11	upregulated	-0.828418	0	0
hsa-miR-1299	ITIH5	upregulated	-0.934509	0	0
hsa-miR-1299	KCNIP1	upregulated	-0.809207	0	0
hsa-miR-1299	KIAA1217	upregulated	-0.907516	0	0
hsa-miR-1299	KIAA1755	upregulated	-0.895862	0	0
hsa-miR-1299	KRTAP1-3	upregulated	-0.746084	0	0
hsa-miR-1299	KRTAP24-1	upregulated	-0.632081	8.17251e-291	3.64791e-290
hsa-miR-1299	KSR2	upregulated	-0.878084	0	0
hsa-miR-1299	LCE1A	upregulated	-0.795075	0	0
hsa-miR-1299	LCE1C	upregulated	-0.687022	0	0
hsa-miR-1299	LGI2	upregulated	-0.758625	0	0
hsa-miR-1299	LRRC10	upregulated	-0.680316	0	0
hsa-miR-1299	LRRC38	upregulated	-0.81334	0	0
hsa-miR-1299	MARK1	upregulated	-0.553118	6.4209e-209	2.24901e-208
hsa-miR-1299	MASP1	upregulated	-0.947026	0	0
hsa-miR-1299	MC2R	upregulated	-0.630105	1.804e-288	8.01639e-288
hsa-miR-1299	MEGF10	upregulated	-0.942208	0	0
hsa-miR-1299	MYRIP	upregulated	-0.814673	0	0
hsa-miR-1299	MYT1L	upregulated	-0.942551	0	0
hsa-miR-1299	NEUROD1	upregulated	-0.681214	0	0
hsa-miR-1299	NEUROD4	upregulated	-0.907193	0	0
hsa-miR-1299	NOTCH3	upregulated	-0.556891	2.42712e-212	8.59605e-212
hsa-miR-1299	NPAP1	upregulated	-0.738841	0	0
hsa-miR-1299	NPY4R	upregulated	-0.677454	0	0
hsa-miR-1299	NRG4	upregulated	-0.551695	1.22187e-207	4.26379e-207
hsa-miR-1299	NTRK2	upregulated	-0.909044	0	0
hsa-miR-1299	OCA2	upregulated	-0.554271	5.84476e-210	2.05446e-209
hsa-miR-1299	OOSP2	upregulated	-0.92994	0	0
hsa-miR-1299	OPRK1	upregulated	-0.703974	0	0
hsa-miR-1299	P4HA3	upregulated	-0.901593	0	0
hsa-miR-1299	PABPC1L2A	upregulated	-0.678092	0	0
hsa-miR-1299	PALM2AKAP2	upregulated	-0.651053	0	0
hsa-miR-1299	PAPPA	upregulated	-0.741476	0	0
hsa-miR-1299	PATE4	upregulated	-0.912562	0	0
hsa-miR-1299	PBOV1	upregulated	-0.686017	0	0
hsa-miR-1299	PCSK1	upregulated	-0.786127	0	0
hsa-miR-1299	PDE11A	upregulated	-0.841118	0	0
hsa-miR-1299	PEX5L	upregulated	-0.654897	0	0
hsa-miR-1299	PHYHIP	upregulated	-0.819313	0	0
hsa-miR-1299	PIGR	upregulated	-0.522543	9.79952e-183	3.20171e-182
hsa-miR-1299	POTEM	upregulated	-0.726069	0	0
hsa-miR-1299	PPM1E	upregulated	-0.845739	0	0
hsa-miR-1299	PRKAA2	upregulated	-0.894812	0	0
hsa-miR-1299	PRND	upregulated	-0.798703	0	0
hsa-miR-1299	PRRX1	upregulated	-0.847531	0	0
hsa-miR-1299	PTPN14	upregulated	-0.555493	4.55756e-211	1.60948e-210
hsa-miR-1299	PTPN3	upregulated	-0.557351	9.22939e-213	3.27166e-212
hsa-miR-1299	PTPRT	upregulated	-0.810962	0	0
hsa-miR-1299	RANBP3L	upregulated	-0.755424	0	0
hsa-miR-1299	RASEF	upregulated	-0.771872	0	0
hsa-miR-1299	RIMS4	upregulated	-0.744114	0	0
hsa-miR-1299	RTL8B	upregulated	-0.814218	0	0
hsa-miR-1299	SCEL	upregulated	-0.791785	0	0
hsa-miR-1299	SEMA6A	upregulated	-0.910523	0	0
hsa-miR-1299	SEMA6D	upregulated	-0.520191	7.87833e-181	2.54835e-180
hsa-miR-1299	SERPINB5	upregulated	-0.763503	0	0
hsa-miR-1299	SGCG	upregulated	-0.709196	0	0
hsa-miR-1299	SHANK2	upregulated	-0.952461	0	0
hsa-miR-1299	SHISA3	upregulated	-0.669817	0	0
hsa-miR-1299	SHISA6	upregulated	-0.735259	0	0
hsa-miR-1299	SLC1A2	upregulated	-0.55706	1.70131e-212	6.02817e-212
hsa-miR-1299	SLC35F1	upregulated	-0.924744	0	0
hsa-miR-1299	SLC5A1	upregulated	-0.903879	0	0
hsa-miR-1299	SLITRK2	upregulated	-0.658711	0	0
hsa-miR-1299	SMOC1	upregulated	-0.52602	1.40426e-185	4.63664e-185
hsa-miR-1299	SMOC2	upregulated	-0.550695	9.61088e-207	3.34424e-206
hsa-miR-1299	SOST	upregulated	-0.774879	0	0
hsa-miR-1299	SP8	upregulated	-0.701683	0	0
hsa-miR-1299	SPDEF	upregulated	-0.89741	0	0
hsa-miR-1299	SRD5A2	upregulated	-0.87198	0	0
hsa-miR-1299	ST8SIA2	upregulated	-0.775997	0	0
hsa-miR-1299	ST8SIA3	upregulated	-0.792799	0	0
hsa-miR-1299	STC1	upregulated	-0.718135	0	0
hsa-miR-1299	SYNPR	upregulated	-0.649343	0	0
hsa-miR-1299	SYT13	upregulated	-0.892389	0	0
hsa-miR-1299	SYT2	upregulated	-0.779292	0	0
hsa-miR-1299	TBX15	upregulated	-0.830304	0	0
hsa-miR-1299	TEAD1	upregulated	-0.850492	0	0
hsa-miR-1299	TEX15	upregulated	-0.713722	0	0
hsa-miR-1299	THSD4	upregulated	-0.8994	0	0
hsa-miR-1299	THY1	upregulated	-0.548641	6.49929e-205	2.24872e-204
hsa-miR-1299	TIMP3	upregulated	-0.904054	0	0
hsa-miR-1299	TMEM132B	upregulated	-0.554338	5.08679e-210	1.78882e-209
hsa-miR-1299	TMEM207	upregulated	-0.651445	0	0
hsa-miR-1299	TMEM35A	upregulated	-0.741547	0	0
hsa-miR-1299	TMPRSS11BNL	upregulated	-0.735722	0	0
hsa-miR-1299	TOX3	upregulated	-0.778969	0	0
hsa-miR-1299	UBE2QL1	upregulated	-0.885087	0	0
hsa-miR-1299	ULBP1	upregulated	-0.870117	0	0
hsa-miR-1299	VGLL1	upregulated	-0.674548	0	0
hsa-miR-1299	WIF1	upregulated	-0.906193	0	0
hsa-miR-1299	WNT5A	upregulated	-0.909087	0	0
hsa-miR-135a-5p	ADAMTS9	downregulated	-0.650168	0	0
hsa-miR-135a-5p	ADCYAP1	downregulated	-0.861853	0	0
hsa-miR-135a-5p	AKR1D1	downregulated	-0.820689	0	0
hsa-miR-135a-5p	AMOTL2	downregulated	-0.947028	0	0
hsa-miR-135a-5p	ANGPT2	downregulated	-0.86493	0	0
hsa-miR-135a-5p	ANGPTL2	downregulated	-0.730724	0	0
hsa-miR-135a-5p	ANO4	downregulated	-0.725253	0	0
hsa-miR-135a-5p	ANTXR1	downregulated	-0.681815	0	0
hsa-miR-135a-5p	ARC	downregulated	-0.774633	0	0
hsa-miR-135a-5p	ATP6V1C2	downregulated	-0.850656	0	0
hsa-miR-135a-5p	C4orf19	downregulated	-0.685989	0	0
hsa-miR-135a-5p	CADM3	downregulated	-0.872177	0	0
hsa-miR-135a-5p	CAMK1G	downregulated	-0.739998	0	0
hsa-miR-135a-5p	CDH13	downregulated	-0.654569	0	0
hsa-miR-135a-5p	CPLX2	downregulated	-0.9246	0	0
hsa-miR-135a-5p	CSMD1	downregulated	-0.876643	0	0
hsa-miR-135a-5p	CXCL12	downregulated	-0.881335	0	0
hsa-miR-135a-5p	DLX5	downregulated	-0.772147	0	0
hsa-miR-135a-5p	DMRT1	downregulated	-0.762021	0	0
hsa-miR-135a-5p	DPF1	downregulated	-0.911355	0	0
hsa-miR-135a-5p	EDNRA	downregulated	-0.705037	0	0
hsa-miR-135a-5p	EFS	downregulated	-0.844826	0	0
hsa-miR-135a-5p	ELOVL2	downregulated	-0.804842	0	0
hsa-miR-135a-5p	FAXC	downregulated	-0.869629	0	0
hsa-miR-135a-5p	GABRB3	downregulated	-0.657247	0	0
hsa-miR-135a-5p	GAGE1	downregulated	-0.71134	0	0
hsa-miR-135a-5p	GATA6	downregulated	-0.86116	0	0
hsa-miR-135a-5p	GDAP1L1	downregulated	-0.824756	0	0
hsa-miR-135a-5p	GHR	downregulated	-0.756724	0	0
hsa-miR-135a-5p	GJA1	downregulated	-0.706889	0	0
hsa-miR-135a-5p	GPX8	downregulated	-0.710248	0	0
hsa-miR-135a-5p	HEYL	downregulated	-0.819342	0	0
hsa-miR-135a-5p	IGF2BP1	downregulated	-0.803237	0	0
hsa-miR-135a-5p	KCNS3	downregulated	-0.742327	0	0
hsa-miR-135a-5p	KIAA1549	downregulated	-0.862774	0	0
hsa-miR-135a-5p	LMX1B	downregulated	-0.709843	0	0
hsa-miR-135a-5p	LRCH2	downregulated	-0.725514	0	0
hsa-miR-135a-5p	LRRC15	downregulated	-0.752958	0	0
hsa-miR-135a-5p	MSX2	downregulated	-0.777444	0	0
hsa-miR-135a-5p	MYOCD	downregulated	-0.830206	0	0
hsa-miR-135a-5p	MYT1L	downregulated	-0.915146	0	0
hsa-miR-135a-5p	NEFM	downregulated	-0.862974	0	0
hsa-miR-135a-5p	NRSN1	downregulated	-0.668973	0	0
hsa-miR-135a-5p	NTRK2	downregulated	-0.864371	0	0
hsa-miR-135a-5p	PAK5	downregulated	-0.882009	0	0
hsa-miR-135a-5p	PALM2AKAP2	downregulated	-0.705547	0	0
hsa-miR-135a-5p	PALMD	downregulated	-0.751678	0	0
hsa-miR-135a-5p	PPM1E	downregulated	-0.821656	0	0
hsa-miR-135a-5p	PRIMA1	downregulated	-0.715217	0	0
hsa-miR-135a-5p	PTPRT	downregulated	-0.7475	0	0
hsa-miR-135a-5p	PURG	downregulated	-0.857503	0	0
hsa-miR-135a-5p	RARB	downregulated	-0.627587	1.65038e-285	7.2667e-285
hsa-miR-135a-5p	SFRP4	downregulated	-0.702586	0	0
hsa-miR-135a-5p	SHISA6	downregulated	-0.677444	0	0
hsa-miR-135a-5p	SLC5A1	downregulated	-0.881826	0	0
hsa-miR-135a-5p	SLC5A7	downregulated	-0.815661	0	0
hsa-miR-135a-5p	SLC6A2	downregulated	-0.881356	0	0
hsa-miR-135a-5p	SLC9A4	downregulated	-0.882719	0	0
hsa-miR-135a-5p	ST6GAL2	downregulated	-0.768635	0	0
hsa-miR-135a-5p	ST8SIA3	downregulated	-0.749339	0	0
hsa-miR-135a-5p	SV2B	downregulated	-0.930589	0	0
hsa-miR-135a-5p	SYT2	downregulated	-0.742024	0	0
hsa-miR-135a-5p	TBX4	downregulated	-0.817742	0	0
hsa-miR-135a-5p	TFAP2A	downregulated	-0.87442	0	0
hsa-miR-135a-5p	THBS2	downregulated	-0.719983	0	0
hsa-miR-135a-5p	THSD4	downregulated	-0.877716	0	0
hsa-miR-135a-5p	TMEM74	downregulated	-0.778667	0	0
hsa-miR-135a-5p	TNFRSF11B	downregulated	-0.792198	0	0
hsa-miR-135a-5p	TRPM3	downregulated	-0.871482	0	0
hsa-miR-136-3p	AMER2	downregulated	-0.592948	2.18278e-247	8.54564e-247
hsa-miR-136-3p	ANTXR1	downregulated	-0.806465	0	0
hsa-miR-136-3p	ARHGAP44	downregulated	-0.936572	0	0
hsa-miR-136-3p	ARHGEF38	downregulated	-0.782559	0	0
hsa-miR-136-3p	C2orf72	downregulated	-0.502761	3.59898e-167	1.11839e-166
hsa-miR-136-3p	C7orf33	downregulated	-0.755657	0	0
hsa-miR-136-3p	CDC20B	downregulated	-0.686738	0	0
hsa-miR-136-3p	CPLX4	downregulated	-0.789085	0	0
hsa-miR-136-3p	CT62	downregulated	-0.728968	0	0
hsa-miR-136-3p	CYP27C1	downregulated	-0.778624	0	0
hsa-miR-136-3p	CYP2A13	downregulated	-0.57583	3.32575e-230	1.23888e-229
hsa-miR-136-3p	EML1	downregulated	-0.687008	0	0
hsa-miR-136-3p	ESRP1	downregulated	-0.72517	0	0
hsa-miR-136-3p	EYA1	downregulated	-0.737969	0	0
hsa-miR-136-3p	FGF7	downregulated	-0.762813	0	0
hsa-miR-136-3p	FZD7	downregulated	-0.688011	0	0
hsa-miR-136-3p	GABRA4	downregulated	-0.662753	0	0
hsa-miR-136-3p	GAD1	downregulated	-0.943142	0	0
hsa-miR-136-3p	GFRA1	downregulated	-0.586622	6.42752e-241	2.46955e-240
hsa-miR-136-3p	GREB1	downregulated	-0.945721	0	0
hsa-miR-136-3p	GRIN2A	downregulated	-0.725484	0	0
hsa-miR-136-3p	HNF4A	downregulated	-0.745865	0	0
hsa-miR-136-3p	HOXB6	downregulated	-0.875638	0	0
hsa-miR-136-3p	HS3ST2	downregulated	-0.575429	8.16106e-230	3.03794e-229
hsa-miR-136-3p	IGFBP5	downregulated	-0.725625	0	0
hsa-miR-136-3p	KCNC1	downregulated	-0.546892	2.29369e-203	7.89651e-203
hsa-miR-136-3p	KCNH5	downregulated	-0.939844	0	0
hsa-miR-136-3p	KRTAP9-2	downregulated	-0.550206	2.62695e-206	9.13086e-206
hsa-miR-136-3p	LYPD6	downregulated	-0.688515	0	0
hsa-miR-136-3p	MEGF10	downregulated	-0.583457	9.80841e-238	3.73424e-237
hsa-miR-136-3p	MEPE	downregulated	-0.68263	0	0
hsa-miR-136-3p	NDRG4	downregulated	-0.90496	0	0
hsa-miR-136-3p	NLRP8	downregulated	-0.719418	0	0
hsa-miR-136-3p	NOTCH3	downregulated	-0.944413	0	0
hsa-miR-136-3p	NTM	downregulated	-0.700016	0	0
hsa-miR-136-3p	NTRK3	downregulated	-0.899667	0	0
hsa-miR-136-3p	NUTM2G	downregulated	-0.645522	3.23369e-307	1.50997e-306
hsa-miR-136-3p	OPN5	downregulated	-0.719041	0	0
hsa-miR-136-3p	PAX3	downregulated	-0.543877	1.01785e-200	3.48306e-200
hsa-miR-136-3p	PCDH11Y	downregulated	-0.74269	0	0
hsa-miR-136-3p	PCDH19	downregulated	-0.683051	0	0
hsa-miR-136-3p	PCDHA4	downregulated	-0.742155	0	0
hsa-miR-136-3p	PCDHA5	downregulated	-0.815909	0	0
hsa-miR-136-3p	PCDHA6	downregulated	-0.876303	0	0
hsa-miR-136-3p	PDE1C	downregulated	-0.742384	0	0
hsa-miR-136-3p	POTEM	downregulated	-0.670891	0	0
hsa-miR-136-3p	PPP3R2	downregulated	-0.569211	7.8957e-224	2.88113e-223
hsa-miR-136-3p	PTPN14	downregulated	-0.943401	0	0
hsa-miR-136-3p	QRFPR	downregulated	-0.667812	0	0
hsa-miR-136-3p	RASEF	downregulated	-0.504734	1.12165e-168	3.50473e-168
hsa-miR-136-3p	SERPINB3	downregulated	-0.625232	9.18648e-283	4.00931e-282
hsa-miR-136-3p	SERPINB4	downregulated	-0.602457	2.18162e-257	8.83488e-257
hsa-miR-136-3p	SLC1A2	downregulated	-0.943453	0	0
hsa-miR-136-3p	SLC2A2	downregulated	-0.545713	2.506e-202	8.60508e-202
hsa-miR-136-3p	SOX11	downregulated	-0.712621	0	0
hsa-miR-136-3p	SPRY4	downregulated	-0.763806	0	0
hsa-miR-136-3p	TENM3	downregulated	-0.584933	3.24795e-239	1.24221e-238
hsa-miR-136-3p	THBS2	downregulated	-0.514288	4.0914e-176	1.30667e-175
hsa-miR-136-3p	TMEM132B	downregulated	-0.943702	0	0
hsa-miR-136-3p	TNC	downregulated	-0.726918	0	0
hsa-miR-136-3p	TRIM67	downregulated	-0.725727	0	0
hsa-miR-136-3p	UNC79	downregulated	-0.938638	0	0
hsa-miR-136-3p	WFDC8	downregulated	-0.654537	0	0
hsa-miR-140-5p	CEMIP	downregulated	-0.519591	2.39583e-180	7.73705e-180
hsa-miR-140-5p	CRISP1	downregulated	-0.687762	0	0
hsa-miR-140-5p	CYP27C1	downregulated	-0.557655	4.86475e-213	1.72486e-212
hsa-miR-140-5p	DMRT2	downregulated	-0.58842	9.65212e-243	3.72561e-242
hsa-miR-140-5p	EPB41L4B	downregulated	-0.549363	1.48334e-205	5.14013e-205
hsa-miR-140-5p	FGF7	downregulated	-0.644933	1.76048e-306	8.20853e-306
hsa-miR-140-5p	GABRB3	downregulated	-0.509694	1.65119e-172	5.21678e-172
hsa-miR-140-5p	GALNT16	downregulated	-0.63552	6.21903e-295	2.80509e-294
hsa-miR-140-5p	GATA6	downregulated	-0.670961	0	0
hsa-miR-140-5p	GBA3	downregulated	-0.782866	0	0
hsa-miR-140-5p	HSPA4L	downregulated	-0.724592	0	0
hsa-miR-140-5p	KCNJ6	downregulated	-0.54931	1.65337e-205	5.72804e-205
hsa-miR-140-5p	KSR2	downregulated	-0.722418	0	0
hsa-miR-140-5p	LRRC15	downregulated	-0.565429	2.98734e-220	1.0804e-219
hsa-miR-140-5p	MNS1	downregulated	-0.5211	1.45061e-181	4.71425e-181
hsa-miR-140-5p	NFASC	downregulated	-0.633265	3.16421e-292	1.41916e-291
hsa-miR-140-5p	NTRK2	downregulated	-0.635946	1.90653e-295	8.61895e-295
hsa-miR-140-5p	PAX3	downregulated	-0.518114	3.67828e-179	1.18377e-178
hsa-miR-140-5p	PAX9	downregulated	-0.667184	0	0
hsa-miR-140-5p	PCDH19	downregulated	-0.671308	0	0
hsa-miR-140-5p	PDZRN3	downregulated	-0.518259	2.81727e-179	9.06856e-179
hsa-miR-140-5p	PROX1	downregulated	-0.88853	0	0
hsa-miR-140-5p	RGS20	downregulated	-0.663177	0	0
hsa-miR-140-5p	SH3GL2	downregulated	-0.686967	0	0
hsa-miR-140-5p	SHROOM3	downregulated	-0.577312	1.18573e-231	4.43778e-231
hsa-miR-140-5p	SLCO2A1	downregulated	-0.59695	1.48202e-251	5.89214e-251
hsa-miR-140-5p	SORCS1	downregulated	-0.506426	5.62063e-170	1.76491e-169
hsa-miR-140-5p	SOX11	downregulated	-0.695102	0	0
hsa-miR-140-5p	TEAD1	downregulated	-0.594773	2.78522e-249	1.09827e-248
hsa-miR-140-5p	TSPAN12	downregulated	-0.789277	0	0
hsa-miR-142-5p	ADAMTS16	downregulated	-0.638286	2.76917e-298	1.26084e-297
hsa-miR-142-5p	ANO2	downregulated	-0.669803	0	0
hsa-miR-142-5p	ATP1B4	downregulated	-0.658879	0	0
hsa-miR-142-5p	C2CD4A	downregulated	-0.518819	1.00036e-179	3.22398e-179
hsa-miR-142-5p	CAMK2A	downregulated	-0.766393	0	0
hsa-miR-142-5p	CBLN4	downregulated	-0.56648	3.05807e-221	1.10952e-220
hsa-miR-142-5p	ENO4	downregulated	-0.584685	5.76861e-239	2.20414e-238
hsa-miR-142-5p	FJX1	downregulated	-0.638191	3.6164e-298	1.64612e-297
hsa-miR-142-5p	FREM2	downregulated	-0.637983	6.47145e-298	2.94317e-297
hsa-miR-142-5p	FZD7	downregulated	-0.5879	3.25625e-242	1.25504e-241
hsa-miR-142-5p	GNG13	downregulated	-0.515429	5.0997e-177	1.63394e-176
hsa-miR-142-5p	HMGA2	downregulated	-0.531753	2.42865e-190	8.11849e-190
hsa-miR-142-5p	HOXD8	downregulated	-0.666651	0	0
hsa-miR-142-5p	KIAA1549	downregulated	-0.585854	3.8366e-240	1.47088e-239
hsa-miR-142-5p	KIF25	downregulated	-0.644202	1.43774e-305	6.6919e-305
hsa-miR-142-5p	MEGF10	downregulated	-0.67302	0	0
hsa-miR-142-5p	MSX2	downregulated	-0.500147	3.45049e-165	1.06413e-164
hsa-miR-142-5p	MYOZ2	downregulated	-0.641406	4.17093e-302	1.91943e-301
hsa-miR-142-5p	MYT1L	downregulated	-0.674043	0	0
hsa-miR-142-5p	NALF1	downregulated	-0.514531	2.62828e-176	8.40236e-176
hsa-miR-142-5p	NHLH2	downregulated	-0.65162	0	0
hsa-miR-142-5p	PRKAA2	downregulated	-0.641747	1.58372e-302	7.29448e-302
hsa-miR-142-5p	RERG	downregulated	-0.635758	3.20858e-295	1.44887e-294
hsa-miR-142-5p	RGS4	downregulated	-0.50158	2.84041e-166	8.78885e-166
hsa-miR-142-5p	RNF186	downregulated	-0.500567	1.65991e-165	5.12514e-165
hsa-miR-142-5p	SCN1A	downregulated	-0.6763	0	0
hsa-miR-142-5p	SHANK2	downregulated	-0.696976	0	0
hsa-miR-142-5p	SHISA9	downregulated	-0.576018	2.18208e-230	8.1342e-230
hsa-miR-142-5p	SLC17A8	downregulated	-0.650336	0	0
hsa-miR-142-5p	SLC9A2	downregulated	-0.521747	4.34013e-182	1.4151e-181
hsa-miR-142-5p	TBX3	downregulated	-0.583991	2.86744e-238	1.09221e-237
hsa-miR-142-5p	TMEM100	downregulated	-0.651893	0	0
hsa-miR-142-5p	TMEM98	downregulated	-0.675241	0	0
hsa-miR-144-5p	EPB41L4B	downregulated	-0.520762	2.72282e-181	8.8343e-181
hsa-miR-144-5p	HTR1D	downregulated	-0.500022	4.28102e-165	1.31899e-164
hsa-miR-144-5p	ID4	downregulated	-0.50225	8.8174e-167	2.73628e-166
hsa-miR-144-5p	MEGF10	downregulated	-0.520476	4.63544e-181	1.50062e-180
hsa-miR-144-5p	PAX3	downregulated	-0.529358	2.43076e-188	8.08137e-188
hsa-miR-144-5p	SCN1A	downregulated	-0.521038	1.62929e-181	5.29277e-181
hsa-miR-144-5p	SH3GL2	downregulated	-0.610762	2.11139e-266	8.77628e-266
hsa-miR-144-5p	ULBP1	downregulated	-0.507033	1.91331e-170	6.01625e-170
hsa-miR-147b-5p	ABRA	downregulated	-0.74313	0	0
hsa-miR-147b-5p	ALK	downregulated	-0.779312	0	0
hsa-miR-147b-5p	ARFGEF3	downregulated	-0.549842	5.5553e-206	1.9284e-205
hsa-miR-147b-5p	ATP6V0D2	downregulated	-0.780092	0	0
hsa-miR-147b-5p	C11orf87	downregulated	-0.731351	0	0
hsa-miR-147b-5p	CCBE1	downregulated	-0.702098	0	0
hsa-miR-147b-5p	CHST3	downregulated	-0.792202	0	0
hsa-miR-147b-5p	COL4A6	downregulated	-0.894242	0	0
hsa-miR-147b-5p	CSRNP3	downregulated	-0.766508	0	0
hsa-miR-147b-5p	DACT2	downregulated	-0.761595	0	0
hsa-miR-147b-5p	DIPK2B	downregulated	-0.784267	0	0
hsa-miR-147b-5p	EDIL3	downregulated	-0.874892	0	0
hsa-miR-147b-5p	EDNRA	downregulated	-0.649212	0	0
hsa-miR-147b-5p	EFR3B	downregulated	-0.894776	0	0
hsa-miR-147b-5p	EMP2	downregulated	-0.908046	0	0
hsa-miR-147b-5p	EPB41L4B	downregulated	-0.934581	0	0
hsa-miR-147b-5p	FOXL2NB	downregulated	-0.811827	0	0
hsa-miR-147b-5p	HEPHL1	downregulated	-0.908926	0	0
hsa-miR-147b-5p	HTR4	downregulated	-0.76116	0	0
hsa-miR-147b-5p	IGF1	downregulated	-0.519901	1.34951e-180	4.3625e-180
hsa-miR-147b-5p	IL17RD	downregulated	-0.74805	0	0
hsa-miR-147b-5p	INSYN2A	downregulated	-0.676024	0	0
hsa-miR-147b-5p	KCNJ6	downregulated	-0.788244	0	0
hsa-miR-147b-5p	KSR2	downregulated	-0.874657	0	0
hsa-miR-147b-5p	MAGEA12	downregulated	-0.633553	1.43062e-292	6.41821e-292
hsa-miR-147b-5p	MAGEA3	downregulated	-0.812156	0	0
hsa-miR-147b-5p	MAGEA6	downregulated	-0.593766	3.10301e-248	1.21844e-247
hsa-miR-147b-5p	NEUROD1	downregulated	-0.672902	0	0
hsa-miR-147b-5p	NOS1	downregulated	-0.80908	0	0
hsa-miR-147b-5p	NR2E3	downregulated	-0.793799	0	0
hsa-miR-147b-5p	NTRK3	downregulated	-0.506327	6.6916e-170	2.10079e-169
hsa-miR-147b-5p	PCDH11Y	downregulated	-0.630555	5.28946e-289	2.35243e-288
hsa-miR-147b-5p	PCDH19	downregulated	-0.88536	0	0
hsa-miR-147b-5p	PCSK1	downregulated	-0.778484	0	0
hsa-miR-147b-5p	PHYHIPL	downregulated	-0.72493	0	0
hsa-miR-147b-5p	PLA2R1	downregulated	-0.842468	0	0
hsa-miR-147b-5p	SALL4	downregulated	-0.547675	4.66252e-204	1.60935e-203
hsa-miR-147b-5p	SCN1A	downregulated	-0.935163	0	0
hsa-miR-147b-5p	SERPINB5	downregulated	-0.759313	0	0
hsa-miR-147b-5p	SHISA9	downregulated	-0.855479	0	0
hsa-miR-147b-5p	SLC1A2	downregulated	-0.552175	4.5343e-208	1.58471e-207
hsa-miR-147b-5p	SOWAHA	downregulated	-0.534942	4.97642e-193	1.67692e-192
hsa-miR-147b-5p	SPRY4	downregulated	-0.593716	3.49654e-248	1.37262e-247
hsa-miR-147b-5p	SPSB4	downregulated	-0.94188	0	0
hsa-miR-147b-5p	SSX7	downregulated	-0.654105	0	0
hsa-miR-147b-5p	SUSD5	downregulated	-0.547393	8.2928e-204	2.85869e-203
hsa-miR-147b-5p	TENM3	downregulated	-0.813169	0	0
hsa-miR-147b-5p	TRIM42	downregulated	-0.795299	0	0
hsa-miR-147b-5p	UNC79	downregulated	-0.529952	7.79075e-189	2.59393e-188
hsa-miR-148a-3p	AMELX	downregulated	-0.537288	5.01863e-195	1.69726e-194
hsa-miR-148a-3p	AMOTL2	downregulated	-0.763618	0	0
hsa-miR-148a-3p	CAMK2A	downregulated	-0.863361	0	0
hsa-miR-148a-3p	CDH20	downregulated	-0.662459	0	0
hsa-miR-148a-3p	DKK1	downregulated	-0.724134	0	0
hsa-miR-148a-3p	EMX2	downregulated	-0.613659	1.31075e-269	5.4943e-269
hsa-miR-148a-3p	HMGA2	downregulated	-0.582017	2.68788e-236	1.02039e-235
hsa-miR-148a-3p	HSPA4L	downregulated	-0.584076	2.35643e-238	8.98427e-238
hsa-miR-148a-3p	ISM2	downregulated	-0.62779	9.55315e-286	4.20863e-285
hsa-miR-148a-3p	KIAA1217	downregulated	-0.574935	2.46851e-229	9.18039e-229
hsa-miR-148a-3p	KIAA1549	downregulated	-0.574475	6.90037e-229	2.56205e-228
hsa-miR-148a-3p	KRT76	downregulated	-0.617148	1.6176e-273	6.88401e-273
hsa-miR-148a-3p	MMP13	downregulated	-0.700189	0	0
hsa-miR-148a-3p	NPY1R	downregulated	-0.616478	9.20518e-273	3.90594e-272
hsa-miR-148a-3p	PLPP4	downregulated	-0.641265	6.22325e-302	2.86057e-301
hsa-miR-148a-3p	RBM24	downregulated	-0.645821	1.36643e-307	6.39181e-307
hsa-miR-148a-3p	SIM1	downregulated	-0.514725	1.84384e-176	5.89812e-176
hsa-miR-148a-3p	SLC35F1	downregulated	-0.625052	1.48636e-282	6.47988e-282
hsa-miR-148a-3p	SLC5A7	downregulated	-0.601784	1.1426e-256	4.60956e-256
hsa-miR-148a-3p	SOX11	downregulated	-0.507299	1.19089e-170	3.74911e-170
hsa-miR-148a-3p	STC1	downregulated	-0.565839	1.22972e-220	4.45147e-220
hsa-miR-148a-3p	TFAP2A	downregulated	-0.615945	3.647e-272	1.54461e-271
hsa-miR-148a-3p	TMEM266	downregulated	-0.505446	3.18953e-169	9.9936e-169
hsa-miR-181b-2-3p	ABCG8	downregulated	-0.710519	0	0
hsa-miR-181b-2-3p	ADCY1	downregulated	-0.714814	0	0
hsa-miR-181b-2-3p	ASB4	downregulated	-0.70613	0	0
hsa-miR-181b-2-3p	CA10	downregulated	-0.581478	9.23294e-236	3.50006e-235
hsa-miR-181b-2-3p	CTXN2	downregulated	-0.579985	2.78515e-234	1.05129e-233
hsa-miR-181b-2-3p	CYP19A1	downregulated	-0.849075	0	0
hsa-miR-181b-2-3p	DMRT2	downregulated	-0.624056	2.11005e-281	9.18129e-281
hsa-miR-181b-2-3p	FAM216B	downregulated	-0.50324	1.5535e-167	4.83226e-167
hsa-miR-181b-2-3p	FAM217A	downregulated	-0.548162	1.72929e-204	5.97413e-204
hsa-miR-181b-2-3p	GABRA4	downregulated	-0.545019	1.01978e-201	3.49642e-201
hsa-miR-181b-2-3p	GABRB1	downregulated	-0.569549	3.75927e-224	1.3727e-223
hsa-miR-181b-2-3p	GNG12	downregulated	-0.501189	5.61738e-166	1.73611e-165
hsa-miR-181b-2-3p	GPR158	downregulated	-0.538197	8.36649e-196	2.8343e-195
hsa-miR-181b-2-3p	GRM5	downregulated	-0.52752	8.13151e-187	2.6944e-186
hsa-miR-181b-2-3p	HIF3A	downregulated	-0.769367	0	0
hsa-miR-181b-2-3p	IVL	downregulated	-0.534749	7.25097e-193	2.44234e-192
hsa-miR-181b-2-3p	KLB	downregulated	-0.503158	1.79419e-167	5.57875e-167
hsa-miR-181b-2-3p	KRT85	downregulated	-0.908232	0	0
hsa-miR-181b-2-3p	LARP6	downregulated	-0.762816	0	0
hsa-miR-181b-2-3p	LIPG	downregulated	-0.625762	2.22578e-283	9.73282e-283
hsa-miR-181b-2-3p	NRK	downregulated	-0.752066	0	0
hsa-miR-181b-2-3p	NTRK3	downregulated	-0.603944	5.54741e-259	2.26092e-258
hsa-miR-181b-2-3p	ODAD2	downregulated	-0.780175	0	0
hsa-miR-181b-2-3p	ONECUT2	downregulated	-0.756723	0	0
hsa-miR-181b-2-3p	PCDHB4	downregulated	-0.501662	2.4621e-166	7.62124e-166
hsa-miR-181b-2-3p	PPM1E	downregulated	-0.523582	1.39623e-183	4.58156e-183
hsa-miR-181b-2-3p	PXDN	downregulated	-0.71758	0	0
hsa-miR-181b-2-3p	RAB3B	downregulated	-0.641445	3.74062e-302	1.7219e-301
hsa-miR-181b-2-3p	SCUBE1	downregulated	-0.523797	9.31961e-184	3.06128e-183
hsa-miR-181b-2-3p	SHISA3	downregulated	-0.527317	1.19769e-186	3.96527e-186
hsa-miR-181b-2-3p	SLC7A2	downregulated	-0.624819	2.76325e-282	1.204e-281
hsa-miR-181b-2-3p	SOX21	downregulated	-0.514362	3.57166e-176	1.14114e-175
hsa-miR-181b-2-3p	SYT14	downregulated	-0.761488	0	0
hsa-miR-181b-2-3p	UNC5D	downregulated	-0.546447	5.66964e-203	1.95105e-202
hsa-miR-181b-2-3p	VSNL1	downregulated	-0.500499	1.87e-165	5.77158e-165
hsa-miR-181b-2-3p	VTCN1	downregulated	-0.839022	0	0
hsa-miR-181b-2-3p	VWC2	downregulated	-0.602491	2.00879e-257	8.13704e-257
hsa-miR-181b-2-3p	XKR4	downregulated	-0.628763	6.89345e-287	3.04958e-286
hsa-miR-181b-3p	ABCG8	downregulated	-0.54267	1.1482e-199	3.91983e-199
hsa-miR-181b-3p	ADGRF5	downregulated	-0.764656	0	0
hsa-miR-181b-3p	ASB15	downregulated	-0.698086	0	0
hsa-miR-181b-3p	ASB4	downregulated	-0.761057	0	0
hsa-miR-181b-3p	ASZ1	downregulated	-0.856732	0	0
hsa-miR-181b-3p	CA10	downregulated	-0.887575	0	0
hsa-miR-181b-3p	CCN1	downregulated	-0.830958	0	0
hsa-miR-181b-3p	CDH11	downregulated	-0.683473	0	0
hsa-miR-181b-3p	CSMD1	downregulated	-0.9121	0	0
hsa-miR-181b-3p	CSRNP3	downregulated	-0.755711	0	0
hsa-miR-181b-3p	CTXN2	downregulated	-0.722994	0	0
hsa-miR-181b-3p	CXCL12	downregulated	-0.884721	0	0
hsa-miR-181b-3p	DCLK1	downregulated	-0.664675	0	0
hsa-miR-181b-3p	DCLK3	downregulated	-0.505468	3.06688e-169	9.61123e-169
hsa-miR-181b-3p	DSCAM	downregulated	-0.908779	0	0
hsa-miR-181b-3p	FAM216B	downregulated	-0.735998	0	0
hsa-miR-181b-3p	FREM2	downregulated	-0.907227	0	0
hsa-miR-181b-3p	GABRA4	downregulated	-0.732905	0	0
hsa-miR-181b-3p	GABRB1	downregulated	-0.700433	0	0
hsa-miR-181b-3p	GNG12	downregulated	-0.739029	0	0
hsa-miR-181b-3p	GPR12	downregulated	-0.759769	0	0
hsa-miR-181b-3p	GRM5	downregulated	-0.752562	0	0
hsa-miR-181b-3p	HECW1	downregulated	-0.698163	0	0
hsa-miR-181b-3p	HIF3A	downregulated	-0.665293	0	0
hsa-miR-181b-3p	HOXB5	downregulated	-0.871914	0	0
hsa-miR-181b-3p	IGSF5	downregulated	-0.642356	2.80324e-303	1.29452e-302
hsa-miR-181b-3p	IYD	downregulated	-0.899872	0	0
hsa-miR-181b-3p	KCNJ6	downregulated	-0.613069	5.92632e-269	2.47631e-268
hsa-miR-181b-3p	KLB	downregulated	-0.798788	0	0
hsa-miR-181b-3p	KSR2	downregulated	-0.633168	4.13114e-292	1.85179e-291
hsa-miR-181b-3p	LIPG	downregulated	-0.5051	5.87129e-169	1.83781e-168
hsa-miR-181b-3p	NFASC	downregulated	-0.696141	0	0
hsa-miR-181b-3p	NR2F2	downregulated	-0.889606	0	0
hsa-miR-181b-3p	NRK	downregulated	-0.632022	9.6099e-291	4.2883e-290
hsa-miR-181b-3p	ODAD2	downregulated	-0.683766	0	0
hsa-miR-181b-3p	ONECUT2	downregulated	-0.636355	6.10311e-296	2.763e-295
hsa-miR-181b-3p	OSMR	downregulated	-0.887665	0	0
hsa-miR-181b-3p	PALM2AKAP2	downregulated	-0.647586	0	0
hsa-miR-181b-3p	PAPPA	downregulated	-0.861658	0	0
hsa-miR-181b-3p	PCDH11Y	downregulated	-0.653961	0	0
hsa-miR-181b-3p	PCDH19	downregulated	-0.667804	0	0
hsa-miR-181b-3p	PCDHB4	downregulated	-0.781863	0	0
hsa-miR-181b-3p	PNPLA3	downregulated	-0.635583	5.21567e-295	2.35386e-294
hsa-miR-181b-3p	PPM1E	downregulated	-0.938271	0	0
hsa-miR-181b-3p	PRAME	downregulated	-0.658146	0	0
hsa-miR-181b-3p	PURG	downregulated	-0.696255	0	0
hsa-miR-181b-3p	PXDN	downregulated	-0.545166	7.5759e-202	2.5986e-201
hsa-miR-181b-3p	RAB3B	downregulated	-0.51476	1.73137e-176	5.53948e-176
hsa-miR-181b-3p	RASEF	downregulated	-0.884103	0	0
hsa-miR-181b-3p	RPTN	downregulated	-0.800862	0	0
hsa-miR-181b-3p	RS1	downregulated	-0.830226	0	0
hsa-miR-181b-3p	SCN3B	downregulated	-0.90444	0	0
hsa-miR-181b-3p	SCUBE1	downregulated	-0.939428	0	0
hsa-miR-181b-3p	SLC7A2	downregulated	-0.503011	2.32411e-167	7.22364e-167
hsa-miR-181b-3p	SOWAHB	downregulated	-0.632245	5.21416e-291	2.32937e-290
hsa-miR-181b-3p	STEAP2	downregulated	-0.569576	3.544e-224	1.29439e-223
hsa-miR-181b-3p	SYNPO2L	downregulated	-0.938104	0	0
hsa-miR-181b-3p	SYT14	downregulated	-0.651047	0	0
hsa-miR-181b-3p	TMEM215	downregulated	-0.805336	0	0
hsa-miR-181b-3p	UNC5D	downregulated	-0.706213	0	0
hsa-miR-181b-3p	VSNL1	downregulated	-0.736383	0	0
hsa-miR-181b-3p	ZNF536	downregulated	-0.796474	0	0
hsa-miR-1827	CAMK2A	downregulated	-0.515148	8.52006e-177	2.72817e-176
hsa-miR-183-5p	GATA6	downregulated	-0.507374	1.04236e-170	3.2828e-170
hsa-miR-183-5p	PAX9	downregulated	-0.504812	9.77769e-169	3.05757e-168
hsa-miR-18b-5p	HMGA2	downregulated	-0.588061	2.2336e-242	8.611e-242
hsa-miR-18b-5p	SOX11	downregulated	-0.521507	6.7908e-182	2.21052e-181
hsa-miR-18b-5p	TIMP3	downregulated	-0.530803	1.51773e-189	5.06601e-189
hsa-miR-190a-5p	ABCA8	downregulated	-0.756699	0	0
hsa-miR-190a-5p	ADAMTS8	downregulated	-0.582157	1.94965e-236	7.40316e-236
hsa-miR-190a-5p	ADAMTS9	downregulated	-0.600472	2.84611e-255	1.14471e-254
hsa-miR-190a-5p	ADCY8	downregulated	-0.726669	0	0
hsa-miR-190a-5p	ANGPTL1	downregulated	-0.731407	0	0
hsa-miR-190a-5p	ANO4	downregulated	-0.660909	0	0
hsa-miR-190a-5p	BOC	downregulated	-0.747842	0	0
hsa-miR-190a-5p	C4orf19	downregulated	-0.661532	0	0
hsa-miR-190a-5p	CA10	downregulated	-0.667045	0	0
hsa-miR-190a-5p	CCDC160	downregulated	-0.682912	0	0
hsa-miR-190a-5p	CDH13	downregulated	-0.636599	3.08894e-296	1.40042e-295
hsa-miR-190a-5p	CDH6	downregulated	-0.803421	0	0
hsa-miR-190a-5p	CLGN	downregulated	-0.888304	0	0
hsa-miR-190a-5p	CNGB3	downregulated	-0.675755	0	0
hsa-miR-190a-5p	CPLX2	downregulated	-0.892388	0	0
hsa-miR-190a-5p	CSMD1	downregulated	-0.810376	0	0
hsa-miR-190a-5p	CSRNP3	downregulated	-0.669129	0	0
hsa-miR-190a-5p	EDIL3	downregulated	-0.860957	0	0
hsa-miR-190a-5p	EDNRA	downregulated	-0.678973	0	0
hsa-miR-190a-5p	EFEMP1	downregulated	-0.693335	0	0
hsa-miR-190a-5p	ENO4	downregulated	-0.842821	0	0
hsa-miR-190a-5p	EPB41L4B	downregulated	-0.880649	0	0
hsa-miR-190a-5p	FNDC1	downregulated	-0.584564	7.62358e-239	2.91151e-238
hsa-miR-190a-5p	FREM2	downregulated	-0.805316	0	0
hsa-miR-190a-5p	GABRA4	downregulated	-0.594484	5.57079e-249	2.19286e-248
hsa-miR-190a-5p	GABRB1	downregulated	-0.698205	0	0
hsa-miR-190a-5p	GCG	downregulated	-0.569022	1.19429e-223	4.35495e-223
hsa-miR-190a-5p	GFRA1	downregulated	-0.729904	0	0
hsa-miR-190a-5p	GREM1	downregulated	-0.721604	0	0
hsa-miR-190a-5p	HAS2	downregulated	-0.866225	0	0
hsa-miR-190a-5p	HECW1	downregulated	-0.843788	0	0
hsa-miR-190a-5p	HMGA2	downregulated	-0.856908	0	0
hsa-miR-190a-5p	HOXC5	downregulated	-0.706601	0	0
hsa-miR-190a-5p	HSPA4L	downregulated	-0.858355	0	0
hsa-miR-190a-5p	IL33	downregulated	-0.666589	0	0
hsa-miR-190a-5p	KLF15	downregulated	-0.751468	0	0
hsa-miR-190a-5p	LRRC31	downregulated	-0.701671	0	0
hsa-miR-190a-5p	MEGF10	downregulated	-0.881405	0	0
hsa-miR-190a-5p	NEUROD1	downregulated	-0.564563	1.94139e-219	6.99261e-219
hsa-miR-190a-5p	NEUROD4	downregulated	-0.848206	0	0
hsa-miR-190a-5p	NFASC	downregulated	-0.844924	0	0
hsa-miR-190a-5p	NKX3-2	downregulated	-0.670705	0	0
hsa-miR-190a-5p	NKX6-1	downregulated	-0.707603	0	0
hsa-miR-190a-5p	NOVA2	downregulated	-0.678136	0	0
hsa-miR-190a-5p	NTRK2	downregulated	-0.848562	0	0
hsa-miR-190a-5p	OPCML	downregulated	-0.820429	0	0
hsa-miR-190a-5p	OR51E2	downregulated	-0.706389	0	0
hsa-miR-190a-5p	PAPPA	downregulated	-0.623159	2.28805e-280	9.9259e-280
hsa-miR-190a-5p	PAX3	downregulated	-0.889133	0	0
hsa-miR-190a-5p	PCDHB11	downregulated	-0.724808	0	0
hsa-miR-190a-5p	PDE11A	downregulated	-0.749733	0	0
hsa-miR-190a-5p	PHYHIPL	downregulated	-0.758168	0	0
hsa-miR-190a-5p	PITX2	downregulated	-0.814499	0	0
hsa-miR-190a-5p	PPM1E	downregulated	-0.752722	0	0
hsa-miR-190a-5p	PPP2R2C	downregulated	-0.688807	0	0
hsa-miR-190a-5p	PRRX1	downregulated	-0.756544	0	0
hsa-miR-190a-5p	PTHLH	downregulated	-0.742823	0	0
hsa-miR-190a-5p	RGN	downregulated	-0.65254	0	0
hsa-miR-190a-5p	SHANK2	downregulated	-0.89164	0	0
hsa-miR-190a-5p	SHISA9	downregulated	-0.776329	0	0
hsa-miR-190a-5p	SLC17A6	downregulated	-0.590446	8.20675e-245	3.19018e-244
hsa-miR-190a-5p	SLC2A2	downregulated	-0.758197	0	0
hsa-miR-190a-5p	SLC7A14	downregulated	-0.681785	0	0
hsa-miR-190a-5p	ST6GAL2	downregulated	-0.754587	0	0
hsa-miR-190a-5p	STC1	downregulated	-0.769934	0	0
hsa-miR-190a-5p	STC2	downregulated	-0.732446	0	0
hsa-miR-190a-5p	TENM3	downregulated	-0.724441	0	0
hsa-miR-190a-5p	TEX15	downregulated	-0.635831	2.62098e-295	1.18387e-294
hsa-miR-190a-5p	TIMP3	downregulated	-0.843777	0	0
hsa-miR-190a-5p	TOX3	downregulated	-0.675054	0	0
hsa-miR-190a-5p	UNC5D	downregulated	-0.57811	1.95911e-232	7.35129e-232
hsa-miR-190a-5p	WNT5A	downregulated	-0.829326	0	0
hsa-miR-190a-5p	ZIC3	downregulated	-0.837959	0	0
hsa-miR-199a-3p	ADAMTSL3	downregulated	-0.639642	6.12352e-300	2.80177e-299
hsa-miR-199a-3p	ALX4	downregulated	-0.609873	2.00483e-265	8.30727e-265
hsa-miR-199a-3p	ATP6V1C2	downregulated	-0.643931	3.12123e-305	1.45022e-304
hsa-miR-199a-3p	CXCL12	downregulated	-0.6171	1.83469e-273	7.8037e-273
hsa-miR-199a-3p	FAT3	downregulated	-0.593598	4.63151e-248	1.81773e-247
hsa-miR-199a-3p	HNF1B	downregulated	-0.664945	0	0
hsa-miR-199a-3p	KDR	downregulated	-0.656973	0	0
hsa-miR-199a-3p	KSR2	downregulated	-0.579435	9.71751e-234	3.66105e-233
hsa-miR-199a-3p	MYO5B	downregulated	-0.64843	0	0
hsa-miR-199a-3p	NR2F2	downregulated	-0.611924	1.10356e-267	4.59791e-267
hsa-miR-199a-3p	NTRK2	downregulated	-0.568944	1.41561e-223	5.15844e-223
hsa-miR-199a-3p	PAK5	downregulated	-0.623639	6.40114e-281	2.78147e-280
hsa-miR-199a-3p	PHYHIPL	downregulated	-0.535316	2.39567e-193	8.0796e-193
hsa-miR-199a-3p	PURG	downregulated	-0.565162	5.32824e-220	1.92395e-219
hsa-miR-199a-3p	SLC5A7	downregulated	-0.593365	8.07521e-248	3.16614e-247
hsa-miR-199a-3p	SYT16	downregulated	-0.6448	2.5825e-306	1.20378e-305
hsa-miR-199a-3p	TBX3	downregulated	-0.564406	2.72854e-219	9.81668e-219
hsa-miR-199a-3p	WNT5A	downregulated	-0.620335	3.95085e-277	1.70186e-276
hsa-miR-199a-3p	WT1	downregulated	-0.60272	1.14125e-257	4.63112e-257
hsa-miR-199a-3p	XKR5	downregulated	-0.656786	0	0
hsa-miR-199b-3p	ADAMTSL3	downregulated	-0.639838	3.52523e-300	1.61341e-299
hsa-miR-199b-3p	ADCYAP1	downregulated	-0.597547	3.50002e-252	1.39535e-251
hsa-miR-199b-3p	ALX4	downregulated	-0.611963	9.98847e-268	4.16273e-267
hsa-miR-199b-3p	ATP1B4	downregulated	-0.626655	2.02463e-284	8.885e-284
hsa-miR-199b-3p	ATP6V1C2	downregulated	-0.644	2.5623e-305	1.19087e-304
hsa-miR-199b-3p	CXCL12	downregulated	-0.618439	5.63536e-275	2.4092e-274
hsa-miR-199b-3p	FAT3	downregulated	-0.591864	2.868e-246	1.11952e-245
hsa-miR-199b-3p	HNF1B	downregulated	-0.666391	0	0
hsa-miR-199b-3p	KDR	downregulated	-0.657649	0	0
hsa-miR-199b-3p	KSR2	downregulated	-0.578788	4.21594e-233	1.58709e-232
hsa-miR-199b-3p	MNX1	downregulated	-0.571186	1.02325e-225	3.75971e-225
hsa-miR-199b-3p	MYO5B	downregulated	-0.648858	0	0
hsa-miR-199b-3p	NR2F2	downregulated	-0.614591	1.19539e-270	5.03062e-270
hsa-miR-199b-3p	NTRK2	downregulated	-0.570135	1.03757e-224	3.79479e-224
hsa-miR-199b-3p	PAK5	downregulated	-0.625677	2.79029e-283	1.21946e-282
hsa-miR-199b-3p	PHYHIPL	downregulated	-0.535612	1.34433e-193	4.53484e-193
hsa-miR-199b-3p	PPM1E	downregulated	-0.544156	5.81151e-201	1.98953e-200
hsa-miR-199b-3p	PURG	downregulated	-0.566124	6.62883e-221	2.40176e-220
hsa-miR-199b-3p	SLC5A7	downregulated	-0.596915	1.61497e-251	6.41909e-251
hsa-miR-199b-3p	SYT16	downregulated	-0.645982	8.5895e-308	4.0215e-307
hsa-miR-199b-3p	TBX3	downregulated	-0.566895	1.24258e-221	4.51137e-221
hsa-miR-199b-3p	WNT5A	downregulated	-0.619323	5.59622e-276	2.40021e-275
hsa-miR-199b-3p	XKR5	downregulated	-0.658726	0	0
hsa-miR-19a-3p	ADAMTSL3	downregulated	-0.931215	0	0
hsa-miR-19a-3p	ANO1	downregulated	-0.897337	0	0
hsa-miR-19a-3p	ARC	downregulated	-0.805954	0	0
hsa-miR-19a-3p	ARFGEF3	downregulated	-0.552653	1.68716e-208	5.90301e-208
hsa-miR-19a-3p	CACNA1C	downregulated	-0.5541	8.3382e-210	2.92896e-209
hsa-miR-19a-3p	CHD5	downregulated	-0.847596	0	0
hsa-miR-19a-3p	CHST1	downregulated	-0.75331	0	0
hsa-miR-19a-3p	CNGA3	downregulated	-0.815829	0	0
hsa-miR-19a-3p	COL1A2	downregulated	-0.93863	0	0
hsa-miR-19a-3p	COX8C	downregulated	-0.888414	0	0
hsa-miR-19a-3p	CSMD1	downregulated	-0.892261	0	0
hsa-miR-19a-3p	CSRNP3	downregulated	-0.769465	0	0
hsa-miR-19a-3p	CXCL12	downregulated	-0.900462	0	0
hsa-miR-19a-3p	DLX3	downregulated	-0.874763	0	0
hsa-miR-19a-3p	DPYSL5	downregulated	-0.695032	0	0
hsa-miR-19a-3p	EDNRB	downregulated	-0.776714	0	0
hsa-miR-19a-3p	EMX2	downregulated	-0.892143	0	0
hsa-miR-19a-3p	FAT3	downregulated	-0.881986	0	0
hsa-miR-19a-3p	FIBIN	downregulated	-0.741216	0	0
hsa-miR-19a-3p	FOXF2	downregulated	-0.51904	6.65562e-180	2.14674e-179
hsa-miR-19a-3p	FOXQ1	downregulated	-0.804064	0	0
hsa-miR-19a-3p	FRAS1	downregulated	-0.501258	4.98577e-166	1.5418e-165
hsa-miR-19a-3p	GJA1	downregulated	-0.750171	0	0
hsa-miR-19a-3p	GRM7	downregulated	-0.640227	1.17348e-300	5.38e-300
hsa-miR-19a-3p	GSC	downregulated	-0.553329	4.14415e-209	1.45251e-208
hsa-miR-19a-3p	HOXD1	downregulated	-0.750089	0	0
hsa-miR-19a-3p	ID4	downregulated	-0.766006	0	0
hsa-miR-19a-3p	IGF1	downregulated	-0.523877	8.02091e-184	2.63686e-183
hsa-miR-19a-3p	KCNS2	downregulated	-0.721544	0	0
hsa-miR-19a-3p	KIAA1217	downregulated	-0.906144	0	0
hsa-miR-19a-3p	LIMCH1	downregulated	-0.524957	1.0471e-184	3.44805e-184
hsa-miR-19a-3p	LRCH2	downregulated	-0.780121	0	0
hsa-miR-19a-3p	MATN3	downregulated	-0.827676	0	0
hsa-miR-19a-3p	MN1	downregulated	-0.90749	0	0
hsa-miR-19a-3p	MYT1L	downregulated	-0.94033	0	0
hsa-miR-19a-3p	NALF1	downregulated	-0.827669	0	0
hsa-miR-19a-3p	NEUROD1	downregulated	-0.680867	0	0
hsa-miR-19a-3p	NEUROG1	downregulated	-0.747706	0	0
hsa-miR-19a-3p	NPAS3	downregulated	-0.548666	6.16921e-205	2.13498e-204
hsa-miR-19a-3p	PCDHA1	downregulated	-0.799648	0	0
hsa-miR-19a-3p	PCDHA11	downregulated	-0.788922	0	0
hsa-miR-19a-3p	PCDHA12	downregulated	-0.816957	0	0
hsa-miR-19a-3p	PCDHA13	downregulated	-0.660035	0	0
hsa-miR-19a-3p	PCDHA2	downregulated	-0.700374	0	0
hsa-miR-19a-3p	PCDHA3	downregulated	-0.764437	0	0
hsa-miR-19a-3p	PCDHA4	downregulated	-0.798734	0	0
hsa-miR-19a-3p	PCDHA5	downregulated	-0.738543	0	0
hsa-miR-19a-3p	PCDHA7	downregulated	-0.759107	0	0
hsa-miR-19a-3p	PCDHA8	downregulated	-0.620587	2.03613e-277	8.77558e-277
hsa-miR-19a-3p	PCDHAC1	downregulated	-0.70114	0	0
hsa-miR-19a-3p	PCDHAC2	downregulated	-0.796602	0	0
hsa-miR-19a-3p	PEX5L	downregulated	-0.648509	0	0
hsa-miR-19a-3p	PITX1	downregulated	-0.867031	0	0
hsa-miR-19a-3p	PLA2G10	downregulated	-0.890363	0	0
hsa-miR-19a-3p	PLPPR1	downregulated	-0.901856	0	0
hsa-miR-19a-3p	PTPN21	downregulated	-0.511132	1.24346e-173	3.94272e-173
hsa-miR-19a-3p	PURG	downregulated	-0.900226	0	0
hsa-miR-19a-3p	RFX4	downregulated	-0.726721	0	0
hsa-miR-19a-3p	SDC1	downregulated	-0.52366	1.20639e-183	3.95945e-183
hsa-miR-19a-3p	SEMA6D	downregulated	-0.51438	3.46133e-176	1.10611e-175
hsa-miR-19a-3p	SFTPA1	downregulated	-0.777494	0	0
hsa-miR-19a-3p	SHANK2	downregulated	-0.949081	0	0
hsa-miR-19a-3p	SLC35F1	downregulated	-0.922872	0	0
hsa-miR-19a-3p	SMOC1	downregulated	-0.525159	7.15414e-185	2.3563e-184
hsa-miR-19a-3p	SMOC2	downregulated	-0.551119	4.0149e-207	1.39888e-206
hsa-miR-19a-3p	SOX21	downregulated	-0.747539	0	0
hsa-miR-19a-3p	STEAP2	downregulated	-0.751614	0	0
hsa-miR-19a-3p	WNT7B	downregulated	-0.885429	0	0
hsa-miR-19a-3p	ZIC5	downregulated	-0.809068	0	0
hsa-miR-19b-3p	ADAMTSL3	downregulated	-0.90445	0	0
hsa-miR-19b-3p	ANO1	downregulated	-0.878833	0	0
hsa-miR-19b-3p	ARC	downregulated	-0.77245	0	0
hsa-miR-19b-3p	C11orf96	downregulated	-0.725772	0	0
hsa-miR-19b-3p	CCL1	downregulated	-0.778454	0	0
hsa-miR-19b-3p	CHD5	downregulated	-0.829643	0	0
hsa-miR-19b-3p	CHST1	downregulated	-0.690175	0	0
hsa-miR-19b-3p	CNGA3	downregulated	-0.780925	0	0
hsa-miR-19b-3p	COL1A2	downregulated	-0.914858	0	0
hsa-miR-19b-3p	COX8C	downregulated	-0.915014	0	0
hsa-miR-19b-3p	CSMD1	downregulated	-0.877576	0	0
hsa-miR-19b-3p	CSRNP3	downregulated	-0.722955	0	0
hsa-miR-19b-3p	DLX3	downregulated	-0.900978	0	0
hsa-miR-19b-3p	DPYSL5	downregulated	-0.63069	3.66535e-289	1.63104e-288
hsa-miR-19b-3p	DSCAM	downregulated	-0.864804	0	0
hsa-miR-19b-3p	EDNRB	downregulated	-0.74555	0	0
hsa-miR-19b-3p	EMX2	downregulated	-0.872484	0	0
hsa-miR-19b-3p	ESRRB	downregulated	-0.824143	0	0
hsa-miR-19b-3p	FAT3	downregulated	-0.864427	0	0
hsa-miR-19b-3p	FIBIN	downregulated	-0.691104	0	0
hsa-miR-19b-3p	FOXQ1	downregulated	-0.770551	0	0
hsa-miR-19b-3p	GJA1	downregulated	-0.706562	0	0
hsa-miR-19b-3p	GRM7	downregulated	-0.566399	3.65035e-221	1.32411e-220
hsa-miR-19b-3p	HOXC8	downregulated	-0.656144	0	0
hsa-miR-19b-3p	HOXD1	downregulated	-0.704492	0	0
hsa-miR-19b-3p	ID4	downregulated	-0.852826	0	0
hsa-miR-19b-3p	KCNS2	downregulated	-0.786913	0	0
hsa-miR-19b-3p	KIAA1217	downregulated	-0.863347	0	0
hsa-miR-19b-3p	LRCH2	downregulated	-0.727638	0	0
hsa-miR-19b-3p	MN1	downregulated	-0.867867	0	0
hsa-miR-19b-3p	MYT1L	downregulated	-0.916893	0	0
hsa-miR-19b-3p	NALF1	downregulated	-0.792176	0	0
hsa-miR-19b-3p	NEUROD1	downregulated	-0.609141	1.27383e-264	5.26456e-264
hsa-miR-19b-3p	NEUROG1	downregulated	-0.701812	0	0
hsa-miR-19b-3p	PCDHA1	downregulated	-0.760079	0	0
hsa-miR-19b-3p	PCDHA11	downregulated	-0.749289	0	0
hsa-miR-19b-3p	PCDHA12	downregulated	-0.779485	0	0
hsa-miR-19b-3p	PCDHA13	downregulated	-0.718173	0	0
hsa-miR-19b-3p	PCDHA2	downregulated	-0.638509	1.47941e-298	6.7456e-298
hsa-miR-19b-3p	PCDHA3	downregulated	-0.848049	0	0
hsa-miR-19b-3p	PCDHA4	downregulated	-0.764486	0	0
hsa-miR-19b-3p	PCDHA5	downregulated	-0.665336	0	0
hsa-miR-19b-3p	PCDHA7	downregulated	-0.789253	0	0
hsa-miR-19b-3p	PCDHA8	downregulated	-0.632598	1.97891e-291	8.85053e-291
hsa-miR-19b-3p	PCDHAC1	downregulated	-0.769813	0	0
hsa-miR-19b-3p	PCDHAC2	downregulated	-0.752757	0	0
hsa-miR-19b-3p	PEX5L	downregulated	-0.581735	5.11922e-236	1.942e-235
hsa-miR-19b-3p	PITX1	downregulated	-0.907086	0	0
hsa-miR-19b-3p	PLA2G10	downregulated	-0.925943	0	0
hsa-miR-19b-3p	PLPPR1	downregulated	-0.881747	0	0
hsa-miR-19b-3p	PRKAA2	downregulated	-0.873173	0	0
hsa-miR-19b-3p	PURG	downregulated	-0.857571	0	0
hsa-miR-19b-3p	REM1	downregulated	-0.839146	0	0
hsa-miR-19b-3p	RFX4	downregulated	-0.676528	0	0
hsa-miR-19b-3p	SFTPA1	downregulated	-0.852158	0	0
hsa-miR-19b-3p	SLC17A6	downregulated	-0.608094	1.77894e-263	7.32545e-263
hsa-miR-19b-3p	SLC35F1	downregulated	-0.891625	0	0
hsa-miR-19b-3p	SOX21	downregulated	-0.698787	0	0
hsa-miR-19b-3p	STEAP2	downregulated	-0.697247	0	0
hsa-miR-19b-3p	TSPAN12	downregulated	-0.872176	0	0
hsa-miR-19b-3p	WIPF3	downregulated	-0.868551	0	0
hsa-miR-19b-3p	WNT7B	downregulated	-0.868553	0	0
hsa-miR-19b-3p	ZIC5	downregulated	-0.773796	0	0
hsa-miR-205-5p	ADAMTS9	upregulated	-0.594602	4.2052e-249	1.65614e-248
hsa-miR-205-5p	ALX4	upregulated	-0.722198	0	0
hsa-miR-205-5p	ANGPT2	upregulated	-0.689374	0	0
hsa-miR-205-5p	ANGPTL7	upregulated	-0.613165	4.63795e-269	1.93898e-268
hsa-miR-205-5p	ANTXR1	upregulated	-0.746595	0	0
hsa-miR-205-5p	BMPER	upregulated	-0.564526	2.10323e-219	7.57383e-219
hsa-miR-205-5p	CALN1	upregulated	-0.56404	5.99619e-219	2.15486e-218
hsa-miR-205-5p	CDC20B	upregulated	-0.587668	5.60461e-242	2.1586e-241
hsa-miR-205-5p	CSRNP3	upregulated	-0.637618	1.7962e-297	8.15963e-297
hsa-miR-205-5p	DLGAP2	upregulated	-0.565544	2.33041e-220	8.43011e-220
hsa-miR-205-5p	ELAVL4	upregulated	-0.560312	1.75348e-215	6.24784e-215
hsa-miR-205-5p	EMP2	upregulated	-0.753231	0	0
hsa-miR-205-5p	EPB41L4B	upregulated	-0.85549	0	0
hsa-miR-205-5p	EVX1	upregulated	-0.720571	0	0
hsa-miR-205-5p	FOXF1	upregulated	-0.594214	1.06313e-248	4.1807e-248
hsa-miR-205-5p	FOXN4	upregulated	-0.610995	1.17028e-266	4.86698e-266
hsa-miR-205-5p	GABRA4	upregulated	-0.564119	5.05555e-219	1.81764e-218
hsa-miR-205-5p	GLYATL1	upregulated	-0.755298	0	0
hsa-miR-205-5p	HOXA11	upregulated	-0.622655	8.70503e-280	3.77123e-279
hsa-miR-205-5p	HOXD9	upregulated	-0.617913	2.21958e-274	9.46868e-274
hsa-miR-205-5p	IGF2BP1	upregulated	-0.684081	0	0
hsa-miR-205-5p	INSYN2A	upregulated	-0.739284	0	0
hsa-miR-205-5p	ITIH5	upregulated	-0.8625	0	0
hsa-miR-205-5p	JPH1	upregulated	-0.554533	3.38392e-210	1.19078e-209
hsa-miR-205-5p	JPH4	upregulated	-0.836882	0	0
hsa-miR-205-5p	KCNJ16	upregulated	-0.56041	1.42282e-215	5.07192e-215
hsa-miR-205-5p	KIF26B	upregulated	-0.919391	0	0
hsa-miR-205-5p	LRP4	upregulated	-0.533611	6.64964e-192	2.23317e-191
hsa-miR-205-5p	LYPD6	upregulated	-0.579697	5.3526e-234	2.01754e-233
hsa-miR-205-5p	MYO5B	upregulated	-0.639996	2.25775e-300	1.03421e-299
hsa-miR-205-5p	NAA11	upregulated	-0.621187	4.19955e-278	1.81292e-277
hsa-miR-205-5p	NALF1	upregulated	-0.692264	0	0
hsa-miR-205-5p	NALF2	upregulated	-0.62995	2.74964e-288	1.22083e-287
hsa-miR-205-5p	NKX2-3	upregulated	-0.823274	0	0
hsa-miR-205-5p	NOX5	upregulated	-0.706292	0	0
hsa-miR-205-5p	ONECUT1	upregulated	-0.747494	0	0
hsa-miR-205-5p	PAX9	upregulated	-0.900117	0	0
hsa-miR-205-5p	PCDH19	upregulated	-0.903177	0	0
hsa-miR-205-5p	PHYHIPL	upregulated	-0.6828	0	0
hsa-miR-205-5p	PLET1	upregulated	-0.561104	3.24452e-216	1.15891e-215
hsa-miR-205-5p	PROX1	upregulated	-0.879873	0	0
hsa-miR-205-5p	PRR15	upregulated	-0.672645	0	0
hsa-miR-205-5p	PTCHD4	upregulated	-0.679423	0	0
hsa-miR-205-5p	PTPN14	upregulated	-0.563666	1.34196e-218	4.81719e-218
hsa-miR-205-5p	SH3GL3	upregulated	-0.753376	0	0
hsa-miR-205-5p	SHISA6	upregulated	-0.607212	1.6259e-262	6.68485e-262
hsa-miR-205-5p	SHROOM3	upregulated	-0.81072	0	0
hsa-miR-205-5p	SLC30A8	upregulated	-0.848854	0	0
hsa-miR-205-5p	STEAP2	upregulated	-0.777483	0	0
hsa-miR-205-5p	SV2B	upregulated	-0.847173	0	0
hsa-miR-205-5p	TBX18	upregulated	-0.551865	8.61118e-208	3.00824e-207
hsa-miR-205-5p	TBX3	upregulated	-0.885447	0	0
hsa-miR-205-5p	TEAD1	upregulated	-0.837205	0	0
hsa-miR-205-5p	TLCD5	upregulated	-0.564001	6.52766e-219	2.34532e-218
hsa-miR-205-5p	TP73	upregulated	-0.717263	0	0
hsa-miR-205-5p	WNT5A	upregulated	-0.733908	0	0
hsa-miR-205-5p	ZNF536	upregulated	-0.631846	1.5555e-290	6.93537e-290
hsa-miR-20a-5p	AMER2	downregulated	-0.737814	0	0
hsa-miR-20a-5p	ANKS4B	downregulated	-0.568243	6.56831e-223	2.39073e-222
hsa-miR-20a-5p	APOH	downregulated	-0.724216	0	0
hsa-miR-20a-5p	BHMT2	downregulated	-0.824887	0	0
hsa-miR-20a-5p	CCDC198	downregulated	-0.725487	0	0
hsa-miR-20a-5p	CCL1	downregulated	-0.783673	0	0
hsa-miR-20a-5p	CHD5	downregulated	-0.755924	0	0
hsa-miR-20a-5p	CSRNP3	downregulated	-0.670929	0	0
hsa-miR-20a-5p	CYP26B1	downregulated	-0.814013	0	0
hsa-miR-20a-5p	DMRTA2	downregulated	-0.585117	2.12208e-239	8.12194e-239
hsa-miR-20a-5p	DPYSL5	downregulated	-0.582606	6.94831e-237	2.64029e-236
hsa-miR-20a-5p	DRD1	downregulated	-0.724045	0	0
hsa-miR-20a-5p	DSPP	downregulated	-0.690735	0	0
hsa-miR-20a-5p	FAM13C	downregulated	-0.534583	1.00328e-192	3.3779e-192
hsa-miR-20a-5p	FAXC	downregulated	-0.815049	0	0
hsa-miR-20a-5p	FBXL7	downregulated	-0.815939	0	0
hsa-miR-20a-5p	FGD1	downregulated	-0.788445	0	0
hsa-miR-20a-5p	FGF7	downregulated	-0.722191	0	0
hsa-miR-20a-5p	FJX1	downregulated	-0.813678	0	0
hsa-miR-20a-5p	FOXF1	downregulated	-0.618858	1.88619e-275	8.07894e-275
hsa-miR-20a-5p	FOXL2	downregulated	-0.638328	2.46047e-298	1.12093e-297
hsa-miR-20a-5p	FOXQ1	downregulated	-0.769778	0	0
hsa-miR-20a-5p	GABBR2	downregulated	-0.753113	0	0
hsa-miR-20a-5p	GATA6	downregulated	-0.852972	0	0
hsa-miR-20a-5p	GJA1	downregulated	-0.705637	0	0
hsa-miR-20a-5p	GPR6	downregulated	-0.690045	0	0
hsa-miR-20a-5p	HAS2	downregulated	-0.867812	0	0
hsa-miR-20a-5p	HMGA2	downregulated	-0.857741	0	0
hsa-miR-20a-5p	HOXD11	downregulated	-0.588757	4.37794e-243	1.6923e-242
hsa-miR-20a-5p	HSPA4L	downregulated	-0.858841	0	0
hsa-miR-20a-5p	IGF2BP1	downregulated	-0.751522	0	0
hsa-miR-20a-5p	ISM2	downregulated	-0.834398	0	0
hsa-miR-20a-5p	KIF26B	downregulated	-0.86011	0	0
hsa-miR-20a-5p	LAMA3	downregulated	-0.848804	0	0
hsa-miR-20a-5p	LHX6	downregulated	-0.812107	0	0
hsa-miR-20a-5p	LYPD6	downregulated	-0.594208	1.07913e-248	4.24259e-248
hsa-miR-20a-5p	MYPN	downregulated	-0.820748	0	0
hsa-miR-20a-5p	MYT1L	downregulated	-0.883588	0	0
hsa-miR-20a-5p	NEUROG1	downregulated	-0.645225	7.61211e-307	3.55239e-306
hsa-miR-20a-5p	NEUROG2	downregulated	-0.842653	0	0
hsa-miR-20a-5p	NKX3-2	downregulated	-0.672831	0	0
hsa-miR-20a-5p	NRSN1	downregulated	-0.615228	2.31953e-271	9.80034e-271
hsa-miR-20a-5p	PAK5	downregulated	-0.83455	0	0
hsa-miR-20a-5p	PCDHA1	downregulated	-0.703379	0	0
hsa-miR-20a-5p	PCDHA11	downregulated	-0.691716	0	0
hsa-miR-20a-5p	PCDHA2	downregulated	-0.592571	5.35071e-247	2.09224e-246
hsa-miR-20a-5p	PCDHA3	downregulated	-0.849143	0	0
hsa-miR-20a-5p	PCDHA4	downregulated	-0.765662	0	0
hsa-miR-20a-5p	PCDHA5	downregulated	-0.647318	0	0
hsa-miR-20a-5p	PCDHA7	downregulated	-0.767044	0	0
hsa-miR-20a-5p	PCDHA8	downregulated	-0.613797	9.19599e-270	3.85674e-269
hsa-miR-20a-5p	PCDHAC1	downregulated	-0.756581	0	0
hsa-miR-20a-5p	PCDHAC2	downregulated	-0.699604	0	0
hsa-miR-20a-5p	PEX5L	downregulated	-0.526827	3.03992e-186	1.00477e-185
hsa-miR-20a-5p	PRR15	downregulated	-0.752768	0	0
hsa-miR-20a-5p	PRRX1	downregulated	-0.760631	0	0
hsa-miR-20a-5p	PTHLH	downregulated	-0.747526	0	0
hsa-miR-20a-5p	QRFPR	downregulated	-0.599254	5.55663e-254	2.22699e-253
hsa-miR-20a-5p	RASL11B	downregulated	-0.73995	0	0
hsa-miR-20a-5p	RNF128	downregulated	-0.719559	0	0
hsa-miR-20a-5p	SALL3	downregulated	-0.847247	0	0
hsa-miR-20a-5p	SCN1A	downregulated	-0.880746	0	0
hsa-miR-20a-5p	SHANK2	downregulated	-0.894185	0	0
hsa-miR-20a-5p	SLC16A9	downregulated	-0.585572	7.38172e-240	2.82797e-239
hsa-miR-20a-5p	SLITRK2	downregulated	-0.677354	0	0
hsa-miR-20a-5p	ST8SIA2	downregulated	-0.672018	0	0
hsa-miR-20a-5p	STC1	downregulated	-0.77135	0	0
hsa-miR-20a-5p	SYNPO2L	downregulated	-0.75138	0	0
hsa-miR-20a-5p	TBX3	downregulated	-0.84464	0	0
hsa-miR-20a-5p	TMEM100	downregulated	-0.826389	0	0
hsa-miR-20a-5p	TSKU	downregulated	-0.819307	0	0
hsa-miR-20a-5p	VSX1	downregulated	-0.72516	0	0
hsa-miR-21-5p	EDIL3	downregulated	-0.523715	1.08752e-183	3.57004e-183
hsa-miR-21-5p	GLDN	downregulated	-0.520635	3.44652e-181	1.1171e-180
hsa-miR-21-5p	HMGA2	downregulated	-0.519878	1.408e-180	4.55066e-180
hsa-miR-21-5p	ITIH5	downregulated	-0.513784	1.02373e-175	3.26554e-175
hsa-miR-21-5p	MYT1L	downregulated	-0.521139	1.34983e-181	4.38762e-181
hsa-miR-21-5p	PCDH19	downregulated	-0.500856	1.00471e-165	3.10335e-165
hsa-miR-21-5p	RBM24	downregulated	-0.516904	3.41261e-178	1.09583e-177
hsa-miR-21-5p	SOD3	downregulated	-0.522739	6.78706e-183	2.21885e-182
hsa-miR-215-5p	ACTBL2	downregulated	-0.60839	8.44786e-264	3.48233e-263
hsa-miR-215-5p	ADAMTSL3	downregulated	-0.69776	0	0
hsa-miR-215-5p	AMER3	downregulated	-0.517233	1.8642e-178	5.98978e-178
hsa-miR-215-5p	ARHGAP36	downregulated	-0.556603	4.44464e-212	1.57134e-211
hsa-miR-215-5p	ATP6V1C2	downregulated	-0.577391	9.9289e-232	3.71778e-231
hsa-miR-215-5p	BHLHE22	downregulated	-0.794553	0	0
hsa-miR-215-5p	BTC	downregulated	-0.66091	0	0
hsa-miR-215-5p	CBLN4	downregulated	-0.559669	6.86998e-215	2.44346e-214
hsa-miR-215-5p	CCDC198	downregulated	-0.543673	1.53444e-200	5.24854e-200
hsa-miR-215-5p	CCNO	downregulated	-0.66034	0	0
hsa-miR-215-5p	CNGB3	downregulated	-0.526089	1.23282e-185	4.07227e-185
hsa-miR-215-5p	CRISP1	downregulated	-0.760864	0	0
hsa-miR-215-5p	DCX	downregulated	-0.562035	4.4445e-217	1.59075e-216
hsa-miR-215-5p	EGFR	downregulated	-0.647379	0	0
hsa-miR-215-5p	EML1	downregulated	-0.724835	0	0
hsa-miR-215-5p	ENTPD3	downregulated	-0.58516	1.92101e-239	7.35592e-239
hsa-miR-215-5p	EPB41L4B	downregulated	-0.693623	0	0
hsa-miR-215-5p	FABP3	downregulated	-0.562664	1.15504e-217	4.14058e-217
hsa-miR-215-5p	FAXC	downregulated	-0.567238	5.88561e-222	2.13784e-221
hsa-miR-215-5p	FERMT1	downregulated	-0.702191	0	0
hsa-miR-215-5p	FGF7	downregulated	-0.712779	0	0
hsa-miR-215-5p	FOXN1	downregulated	-0.532271	8.92862e-191	2.98843e-190
hsa-miR-215-5p	FZD7	downregulated	-0.729111	0	0
hsa-miR-215-5p	GALNT16	downregulated	-0.725165	0	0
hsa-miR-215-5p	GPR22	downregulated	-0.635211	1.46472e-294	6.60101e-294
hsa-miR-215-5p	HNF1B	downregulated	-0.684646	0	0
hsa-miR-215-5p	ID4	downregulated	-0.76814	0	0
hsa-miR-215-5p	IGF1	downregulated	-0.534038	2.89735e-192	9.7385e-192
hsa-miR-215-5p	KCNE4	downregulated	-0.516329	9.80451e-178	3.14643e-177
hsa-miR-215-5p	KCNS3	downregulated	-0.503428	1.11772e-167	3.47879e-167
hsa-miR-215-5p	KLB	downregulated	-0.512165	1.92816e-174	6.13208e-174
hsa-miR-215-5p	KLK10	downregulated	-0.517238	1.84945e-178	5.94358e-178
hsa-miR-215-5p	LHX6	downregulated	-0.563176	3.85166e-218	1.38199e-217
hsa-miR-215-5p	LVRN	downregulated	-0.534432	1.34507e-192	4.5239e-192
hsa-miR-215-5p	MEX3B	downregulated	-0.53567	1.19955e-193	4.04731e-193
hsa-miR-215-5p	MNS1	downregulated	-0.680019	0	0
hsa-miR-215-5p	MSX2	downregulated	-0.522959	4.4979e-183	1.47198e-182
hsa-miR-215-5p	MYO5B	downregulated	-0.58305	2.50425e-237	9.52958e-237
hsa-miR-215-5p	MYPN	downregulated	-0.581113	2.12499e-235	8.04591e-235
hsa-miR-215-5p	NALF1	downregulated	-0.560997	4.07438e-216	1.45468e-215
hsa-miR-215-5p	NKX2-5	downregulated	-0.602224	3.874e-257	1.56685e-256
hsa-miR-215-5p	NTRK2	downregulated	-0.726991	0	0
hsa-miR-215-5p	OLIG3	downregulated	-0.569768	2.32501e-224	8.49954e-224
hsa-miR-215-5p	OTX2	downregulated	-0.53694	9.94451e-195	3.36029e-194
hsa-miR-215-5p	PCDH19	downregulated	-0.751909	0	0
hsa-miR-215-5p	PCSK9	downregulated	-0.744864	0	0
hsa-miR-215-5p	PDLIM3	downregulated	-0.570338	6.63552e-225	2.4291e-224
hsa-miR-215-5p	PMP2	downregulated	-0.645835	1.31185e-307	6.13829e-307
hsa-miR-215-5p	PRKAA2	downregulated	-0.5674	4.13912e-222	1.50449e-221
hsa-miR-215-5p	PTPRT	downregulated	-0.659866	0	0
hsa-miR-215-5p	PWWP3B	downregulated	-0.694055	0	0
hsa-miR-215-5p	RADIL	downregulated	-0.69629	0	0
hsa-miR-215-5p	RHCG	downregulated	-0.661596	0	0
hsa-miR-215-5p	SCN1A	downregulated	-0.687996	0	0
hsa-miR-215-5p	SHANK2	downregulated	-0.681834	0	0
hsa-miR-215-5p	SOX9	downregulated	-0.570493	4.71393e-225	1.72685e-224
hsa-miR-215-5p	SP8	downregulated	-0.683402	0	0
hsa-miR-215-5p	STC1	downregulated	-0.704117	0	0
hsa-miR-215-5p	SYT6	downregulated	-0.533877	3.96208e-192	1.33144e-191
hsa-miR-215-5p	SYT9	downregulated	-0.525206	6.55014e-185	2.15781e-184
hsa-miR-215-5p	TPD52L3	downregulated	-0.550078	3.41917e-206	1.18767e-205
hsa-miR-215-5p	TTPA	downregulated	-0.656548	0	0
hsa-miR-215-5p	UBE2QL1	downregulated	-0.703365	0	0
hsa-miR-215-5p	VAX1	downregulated	-0.547262	1.08073e-203	3.72387e-203
hsa-miR-215-5p	WSCD2	downregulated	-0.603564	1.42164e-258	5.78963e-258
hsa-miR-215-5p	WT1	downregulated	-0.564961	8.23067e-220	2.96659e-219
hsa-miR-215-5p	ZBTB8B	downregulated	-0.604079	3.97404e-259	1.62051e-258
hsa-miR-215-5p	ZIC5	downregulated	-0.559318	1.44496e-214	5.13357e-214
hsa-miR-215-5p	ZNF536	downregulated	-0.517292	1.67438e-178	5.38316e-178
hsa-miR-26a-2-3p	ADGRF5	downregulated	-0.588522	7.59263e-243	2.93209e-242
hsa-miR-26a-2-3p	ARNT2	downregulated	-0.615806	5.23222e-272	2.21422e-271
hsa-miR-26a-2-3p	ASB4	downregulated	-0.603531	1.5405e-258	6.27211e-258
hsa-miR-26a-2-3p	ATP10B	downregulated	-0.50965	1.78769e-172	5.6458e-172
hsa-miR-26a-2-3p	ATP2B3	downregulated	-0.519316	3.98973e-180	1.28765e-179
hsa-miR-26a-2-3p	BHMT2	downregulated	-0.704299	0	0
hsa-miR-26a-2-3p	CBLN4	downregulated	-0.680679	0	0
hsa-miR-26a-2-3p	CCBE1	downregulated	-0.549536	1.03913e-205	3.60238e-205
hsa-miR-26a-2-3p	CRTAC1	downregulated	-0.739217	0	0
hsa-miR-26a-2-3p	CSRNP3	downregulated	-0.579473	8.90838e-234	3.35701e-233
hsa-miR-26a-2-3p	CTNND2	downregulated	-0.744744	0	0
hsa-miR-26a-2-3p	DCX	downregulated	-0.63509	2.04622e-294	9.21902e-294
hsa-miR-26a-2-3p	DMRT3	downregulated	-0.632151	6.76164e-291	3.019e-290
hsa-miR-26a-2-3p	DPYSL5	downregulated	-0.51871	1.22512e-179	3.94674e-179
hsa-miR-26a-2-3p	EPB41L1	downregulated	-0.527261	1.33146e-186	4.40631e-186
hsa-miR-26a-2-3p	FAT3	downregulated	-0.746154	0	0
hsa-miR-26a-2-3p	FLG	downregulated	-0.643691	6.20772e-305	2.87924e-304
hsa-miR-26a-2-3p	FLRT1	downregulated	-0.656397	0	0
hsa-miR-26a-2-3p	FOXL2NB	downregulated	-0.636289	7.34243e-296	3.32312e-295
hsa-miR-26a-2-3p	GABRA4	downregulated	-0.560808	6.09536e-216	2.17476e-215
hsa-miR-26a-2-3p	GABRA5	downregulated	-0.717006	0	0
hsa-miR-26a-2-3p	GABRB1	downregulated	-0.71508	0	0
hsa-miR-26a-2-3p	GJB2	downregulated	-0.534241	1.95324e-192	6.56796e-192
hsa-miR-26a-2-3p	GLYATL1	downregulated	-0.700538	0	0
hsa-miR-26a-2-3p	HOXC8	downregulated	-0.534611	9.49055e-193	3.19602e-192
hsa-miR-26a-2-3p	HRNR	downregulated	-0.590038	2.1513e-244	8.35856e-244
hsa-miR-26a-2-3p	HS6ST3	downregulated	-0.661765	0	0
hsa-miR-26a-2-3p	IYD	downregulated	-0.728327	0	0
hsa-miR-26a-2-3p	KIAA1549L	downregulated	-0.659195	0	0
hsa-miR-26a-2-3p	KRT27	downregulated	-0.549236	1.92454e-205	6.66607e-205
hsa-miR-26a-2-3p	KRT7	downregulated	-0.528852	6.41191e-188	2.12993e-187
hsa-miR-26a-2-3p	LGI2	downregulated	-0.600827	1.1944e-255	4.80876e-255
hsa-miR-26a-2-3p	LMOD3	downregulated	-0.605733	6.53122e-261	2.67492e-260
hsa-miR-26a-2-3p	MYT1L	downregulated	-0.609329	7.9372e-265	3.28205e-264
hsa-miR-26a-2-3p	NELL1	downregulated	-0.598845	1.50349e-253	6.01509e-253
hsa-miR-26a-2-3p	OOSP2	downregulated	-0.710416	0	0
hsa-miR-26a-2-3p	PALM2AKAP2	downregulated	-0.721333	0	0
hsa-miR-26a-2-3p	PCDHB7	downregulated	-0.635751	3.27458e-295	1.47826e-294
hsa-miR-26a-2-3p	PITX2	downregulated	-0.734757	0	0
hsa-miR-26a-2-3p	PPM1E	downregulated	-0.780364	0	0
hsa-miR-26a-2-3p	PRRX1	downregulated	-0.67786	0	0
hsa-miR-26a-2-3p	PWWP3B	downregulated	-0.703411	0	0
hsa-miR-26a-2-3p	RANBP3L	downregulated	-0.571063	1.34222e-225	4.92944e-225
hsa-miR-26a-2-3p	RNF186	downregulated	-0.646878	0	3.02162e-308
hsa-miR-26a-2-3p	SHISA6	downregulated	-0.549609	8.95454e-206	3.10701e-205
hsa-miR-26a-2-3p	SIM1	downregulated	-0.674334	0	0
hsa-miR-26a-2-3p	SIX3	downregulated	-0.676504	0	0
hsa-miR-26a-2-3p	SLC35F1	downregulated	-0.567281	5.35653e-222	1.9461e-221
hsa-miR-26a-2-3p	SLC7A14	downregulated	-0.59561	3.73775e-250	1.47753e-249
hsa-miR-26a-2-3p	SLITRK2	downregulated	-0.686826	0	0
hsa-miR-26a-2-3p	ST8SIA3	downregulated	-0.633653	1.08787e-292	4.88191e-292
hsa-miR-26a-2-3p	TACR1	downregulated	-0.604646	9.75501e-260	3.98806e-259
hsa-miR-26a-2-3p	TAFA4	downregulated	-0.639577	7.35367e-300	3.36364e-299
hsa-miR-26a-2-3p	TSPYL6	downregulated	-0.520304	6.38226e-181	2.06569e-180
hsa-miR-26b-5p	ANO2	downregulated	-0.789453	0	0
hsa-miR-26b-5p	ARNT2	downregulated	-0.663452	0	0
hsa-miR-26b-5p	B3GALT1	downregulated	-0.711345	0	0
hsa-miR-26b-5p	CACNA1S	downregulated	-0.613584	1.58682e-269	6.64624e-269
hsa-miR-26b-5p	CAMK2A	downregulated	-0.864161	0	0
hsa-miR-26b-5p	CDH20	downregulated	-0.661074	0	0
hsa-miR-26b-5p	CHD5	downregulated	-0.548443	9.73487e-205	3.36601e-204
hsa-miR-26b-5p	COL1A2	downregulated	-0.658923	0	0
hsa-miR-26b-5p	COL4A2	downregulated	-0.549403	1.36472e-205	4.7301e-205
hsa-miR-26b-5p	CYP4A11	downregulated	-0.502052	1.24658e-166	3.86247e-166
hsa-miR-26b-5p	CYP4A22	downregulated	-0.513852	9.03885e-176	2.88383e-175
hsa-miR-26b-5p	DPYSL3	downregulated	-0.687258	0	0
hsa-miR-26b-5p	EPB41L4B	downregulated	-0.655989	0	0
hsa-miR-26b-5p	FARP1	downregulated	-0.572498	5.6131e-227	2.07152e-226
hsa-miR-26b-5p	FAXC	downregulated	-0.607484	8.2118e-263	3.37802e-262
hsa-miR-26b-5p	FGFR3	downregulated	-0.613413	2.45976e-269	1.02944e-268
hsa-miR-26b-5p	FMO3	downregulated	-0.619646	2.40305e-276	1.03095e-275
hsa-miR-26b-5p	GLI2	downregulated	-0.605106	3.11054e-260	1.27264e-259
hsa-miR-26b-5p	HAS2	downregulated	-0.701414	0	0
hsa-miR-26b-5p	HEPHL1	downregulated	-0.595855	2.07788e-250	8.22408e-250
hsa-miR-26b-5p	HMGA2	downregulated	-0.579893	3.4275e-234	1.29284e-233
hsa-miR-26b-5p	HOXD13	downregulated	-0.534519	1.13459e-192	3.81841e-192
hsa-miR-26b-5p	HTR2A	downregulated	-0.685399	0	0
hsa-miR-26b-5p	KCNQ4	downregulated	-0.571156	1.09468e-225	4.02126e-225
hsa-miR-26b-5p	KRT4	downregulated	-0.617208	1.3855e-273	5.89941e-273
hsa-miR-26b-5p	LAMA3	downregulated	-0.572104	1.34339e-226	4.94858e-226
hsa-miR-26b-5p	LHX6	downregulated	-0.604376	1.90523e-259	7.77901e-259
hsa-miR-26b-5p	MEP1A	downregulated	-0.685679	0	0
hsa-miR-26b-5p	MNX1	downregulated	-0.571853	2.34447e-226	8.63025e-226
hsa-miR-26b-5p	MYO5B	downregulated	-0.652527	0	0
hsa-miR-26b-5p	MYT1L	downregulated	-0.660314	0	0
hsa-miR-26b-5p	NKX2-2	downregulated	-0.686894	0	0
hsa-miR-26b-5p	NKX2-5	downregulated	-0.630875	2.21297e-289	9.8502e-289
hsa-miR-26b-5p	OPCML	downregulated	-0.614281	2.65347e-270	1.11579e-269
hsa-miR-26b-5p	OR10H1	downregulated	-0.623324	1.47909e-280	6.42355e-280
hsa-miR-26b-5p	OTC	downregulated	-0.522476	1.11038e-182	3.62561e-182
hsa-miR-26b-5p	PCDHB8	downregulated	-0.584018	2.69121e-238	1.02558e-237
hsa-miR-26b-5p	PPIC	downregulated	-0.684117	0	0
hsa-miR-26b-5p	PRKAA2	downregulated	-0.609443	5.9461e-265	2.46192e-264
hsa-miR-26b-5p	RBM24	downregulated	-0.645058	1.22961e-306	5.73494e-306
hsa-miR-26b-5p	RBM46	downregulated	-0.504431	1.91402e-168	5.97356e-168
hsa-miR-26b-5p	SH3GL2	downregulated	-0.725946	0	0
hsa-miR-26b-5p	SHANK2	downregulated	-0.686572	0	0
hsa-miR-26b-5p	SLC1A6	downregulated	-0.51099	1.60587e-173	5.08878e-173
hsa-miR-26b-5p	SLC26A9	downregulated	-0.539121	1.34789e-196	4.57207e-196
hsa-miR-26b-5p	SPRR1A	downregulated	-0.677789	0	0
hsa-miR-26b-5p	SV2B	downregulated	-0.689915	0	0
hsa-miR-26b-5p	TFAP2A	downregulated	-0.612328	3.93921e-268	1.64384e-267
hsa-miR-26b-5p	TMEM132A	downregulated	-0.570499	4.65259e-225	1.70477e-224
hsa-miR-26b-5p	TSKU	downregulated	-0.611469	3.50669e-267	1.45951e-266
hsa-miR-26b-5p	TSPAN12	downregulated	-0.645936	9.79355e-308	4.58388e-307
hsa-miR-26b-5p	UBE2QL1	downregulated	-0.736995	0	0
hsa-miR-26b-5p	WNT5A	downregulated	-0.62313	2.47321e-280	1.07263e-279
hsa-miR-29b-3p	ADAMTS2	downregulated	-0.863617	0	0
hsa-miR-29b-3p	ADAMTS9	downregulated	-0.614573	1.25469e-270	5.27881e-270
hsa-miR-29b-3p	C11orf87	downregulated	-0.645285	6.39435e-307	2.98497e-306
hsa-miR-29b-3p	CACNG4	downregulated	-0.626592	2.39806e-284	1.0518e-283
hsa-miR-29b-3p	CD276	downregulated	-0.738533	0	0
hsa-miR-29b-3p	CEMIP	downregulated	-0.899554	0	0
hsa-miR-29b-3p	COL1A2	downregulated	-0.888193	0	0
hsa-miR-29b-3p	COL27A1	downregulated	-0.810444	0	0
hsa-miR-29b-3p	COL4A2	downregulated	-0.765388	0	0
hsa-miR-29b-3p	COL4A6	downregulated	-0.830897	0	0
hsa-miR-29b-3p	COLEC10	downregulated	-0.693813	0	0
hsa-miR-29b-3p	CSPG4	downregulated	-0.777367	0	0
hsa-miR-29b-3p	DCX	downregulated	-0.763564	0	0
hsa-miR-29b-3p	DNM3OS	downregulated	-0.643901	3.40466e-305	1.58144e-304
hsa-miR-29b-3p	DPYSL5	downregulated	-0.593261	1.03551e-247	4.05806e-247
hsa-miR-29b-3p	FGA	downregulated	-0.719609	0	0
hsa-miR-29b-3p	FGB	downregulated	-0.673727	0	0
hsa-miR-29b-3p	FGG	downregulated	-0.780122	0	0
hsa-miR-29b-3p	FJX1	downregulated	-0.818777	0	0
hsa-miR-29b-3p	FREM2	downregulated	-0.81082	0	0
hsa-miR-29b-3p	GLDN	downregulated	-0.861178	0	0
hsa-miR-29b-3p	GNG12	downregulated	-0.66267	0	0
hsa-miR-29b-3p	GRM4	downregulated	-0.899605	0	0
hsa-miR-29b-3p	HECW1	downregulated	-0.850842	0	0
hsa-miR-29b-3p	HMGA2	downregulated	-0.863789	0	0
hsa-miR-29b-3p	ISLR2	downregulated	-0.711713	0	0
hsa-miR-29b-3p	KIAA1549	downregulated	-0.855536	0	0
hsa-miR-29b-3p	KIF26A	downregulated	-0.944467	0	0
hsa-miR-29b-3p	KIF26B	downregulated	-0.866745	0	0
hsa-miR-29b-3p	KIRREL1	downregulated	-0.602417	2.40845e-257	9.75098e-257
hsa-miR-29b-3p	LAMC2	downregulated	-0.794212	0	0
hsa-miR-29b-3p	NKAIN1	downregulated	-0.826025	0	0
hsa-miR-29b-3p	NRSN1	downregulated	-0.627662	1.34743e-285	5.93445e-285
hsa-miR-29b-3p	PCDHA1	downregulated	-0.714171	0	0
hsa-miR-29b-3p	PCDHA11	downregulated	-0.702192	0	0
hsa-miR-29b-3p	PCDHA12	downregulated	-0.7349	0	0
hsa-miR-29b-3p	PCDHA13	downregulated	-0.71975	0	0
hsa-miR-29b-3p	PCDHA2	downregulated	-0.604293	2.33941e-259	9.54929e-259
hsa-miR-29b-3p	PCDHA3	downregulated	-0.851502	0	0
hsa-miR-29b-3p	PCDHA4	downregulated	-0.775269	0	0
hsa-miR-29b-3p	PCDHA5	downregulated	-0.657656	0	0
hsa-miR-29b-3p	PCDHA7	downregulated	-0.771135	0	0
hsa-miR-29b-3p	PCDHA8	downregulated	-0.632623	1.84873e-291	8.27065e-291
hsa-miR-29b-3p	PCDHAC1	downregulated	-0.769573	0	0
hsa-miR-29b-3p	PCDHAC2	downregulated	-0.710857	0	0
hsa-miR-29b-3p	PPIC	downregulated	-0.846624	0	0
hsa-miR-29b-3p	PPM1E	downregulated	-0.757184	0	0
hsa-miR-29b-3p	PTHLH	downregulated	-0.760501	0	0
hsa-miR-29b-3p	PURG	downregulated	-0.847893	0	0
hsa-miR-29b-3p	RAET1L	downregulated	-0.767178	0	0
hsa-miR-29b-3p	RARB	downregulated	-0.627451	2.3814e-285	1.04767e-284
hsa-miR-29b-3p	RAX	downregulated	-0.723735	0	0
hsa-miR-29b-3p	SCN3B	downregulated	-0.821724	0	0
hsa-miR-29b-3p	SLC5A8	downregulated	-0.772807	0	0
hsa-miR-29b-3p	STC1	downregulated	-0.784097	0	0
hsa-miR-29b-3p	TENM3	downregulated	-0.737984	0	0
hsa-miR-29b-3p	TFAP2C	downregulated	-0.664728	0	0
hsa-miR-29b-3p	UPK1B	downregulated	-0.691382	0	0
hsa-miR-29b-3p	ZIC5	downregulated	-0.733308	0	0
hsa-miR-29c-3p	ADAMTS2	downregulated	-0.861874	0	0
hsa-miR-29c-3p	ADAMTS9	downregulated	-0.611451	3.67171e-267	1.5278e-266
hsa-miR-29c-3p	C11orf87	downregulated	-0.640552	4.69412e-301	2.15458e-300
hsa-miR-29c-3p	CACNG4	downregulated	-0.619179	8.15617e-276	3.49629e-275
hsa-miR-29c-3p	CD276	downregulated	-0.734587	0	0
hsa-miR-29c-3p	CEMIP	downregulated	-0.896241	0	0
hsa-miR-29c-3p	COL1A2	downregulated	-0.88625	0	0
hsa-miR-29c-3p	COL27A1	downregulated	-0.806578	0	0
hsa-miR-29c-3p	COL4A2	downregulated	-0.762223	0	0
hsa-miR-29c-3p	COL4A6	downregulated	-0.83061	0	0
hsa-miR-29c-3p	COLEC10	downregulated	-0.688979	0	0
hsa-miR-29c-3p	CSPG4	downregulated	-0.772727	0	0
hsa-miR-29c-3p	DCX	downregulated	-0.755869	0	0
hsa-miR-29c-3p	DPYSL3	downregulated	-0.899085	0	0
hsa-miR-29c-3p	DPYSL5	downregulated	-0.58914	1.78061e-243	6.89974e-243
hsa-miR-29c-3p	EN1	downregulated	-0.732107	0	0
hsa-miR-29c-3p	EPB41L4B	downregulated	-0.885253	0	0
hsa-miR-29c-3p	FAXC	downregulated	-0.819989	0	0
hsa-miR-29c-3p	FGA	downregulated	-0.715167	0	0
hsa-miR-29c-3p	FGB	downregulated	-0.667258	0	0
hsa-miR-29c-3p	FGG	downregulated	-0.776074	0	0
hsa-miR-29c-3p	FJX1	downregulated	-0.81717	0	0
hsa-miR-29c-3p	FREM2	downregulated	-0.811171	0	0
hsa-miR-29c-3p	GABRP	downregulated	-0.711577	0	0
hsa-miR-29c-3p	GLDN	downregulated	-0.856948	0	0
hsa-miR-29c-3p	GNG12	downregulated	-0.659243	0	0
hsa-miR-29c-3p	GRM4	downregulated	-0.897675	0	0
hsa-miR-29c-3p	HECW1	downregulated	-0.849896	0	0
hsa-miR-29c-3p	IGF2BP1	downregulated	-0.75778	0	0
hsa-miR-29c-3p	ISLR2	downregulated	-0.707798	0	0
hsa-miR-29c-3p	KCNJ12	downregulated	-0.853049	0	0
hsa-miR-29c-3p	KIAA1549	downregulated	-0.853312	0	0
hsa-miR-29c-3p	KIF26A	downregulated	-0.941827	0	0
hsa-miR-29c-3p	KIF26B	downregulated	-0.864544	0	0
hsa-miR-29c-3p	KIRREL1	downregulated	-0.595737	2.75633e-250	1.09039e-249
hsa-miR-29c-3p	LAMC2	downregulated	-0.790828	0	0
hsa-miR-29c-3p	NKAIN1	downregulated	-0.825854	0	0
hsa-miR-29c-3p	NRSN1	downregulated	-0.622522	1.23868e-279	5.36479e-279
hsa-miR-29c-3p	PALM2AKAP2	downregulated	-0.701132	0	0
hsa-miR-29c-3p	PCDHA1	downregulated	-0.711148	0	0
hsa-miR-29c-3p	PCDHA11	downregulated	-0.697008	0	0
hsa-miR-29c-3p	PCDHA12	downregulated	-0.732693	0	0
hsa-miR-29c-3p	PCDHA13	downregulated	-0.711165	0	0
hsa-miR-29c-3p	PCDHA2	downregulated	-0.59918	6.64884e-254	2.66205e-253
hsa-miR-29c-3p	PCDHA3	downregulated	-0.85108	0	0
hsa-miR-29c-3p	PCDHA4	downregulated	-0.770898	0	0
hsa-miR-29c-3p	PCDHA5	downregulated	-0.650866	0	0
hsa-miR-29c-3p	PCDHA7	downregulated	-0.772039	0	0
hsa-miR-29c-3p	PCDHA8	downregulated	-0.62634	4.72205e-284	2.06939e-283
hsa-miR-29c-3p	PCDHAC1	downregulated	-0.766485	0	0
hsa-miR-29c-3p	PCDHAC2	downregulated	-0.705399	0	0
hsa-miR-29c-3p	PPIC	downregulated	-0.84597	0	0
hsa-miR-29c-3p	PPM1E	downregulated	-0.756988	0	0
hsa-miR-29c-3p	PTHLH	downregulated	-0.752094	0	0
hsa-miR-29c-3p	PURG	downregulated	-0.845871	0	0
hsa-miR-29c-3p	RAET1L	downregulated	-0.761069	0	0
hsa-miR-29c-3p	RARB	downregulated	-0.623162	2.27449e-280	9.86977e-280
hsa-miR-29c-3p	SCN3B	downregulated	-0.820128	0	0
hsa-miR-29c-3p	SFTA3	downregulated	-0.757973	0	0
hsa-miR-29c-3p	SLC5A8	downregulated	-0.767467	0	0
hsa-miR-29c-3p	STC1	downregulated	-0.78038	0	0
hsa-miR-29c-3p	SYT2	downregulated	-0.676874	0	0
hsa-miR-29c-3p	TENM3	downregulated	-0.733935	0	0
hsa-miR-29c-3p	TFAP2C	downregulated	-0.664745	0	0
hsa-miR-29c-3p	TMEM132A	downregulated	-0.85086	0	0
hsa-miR-29c-3p	UPK1B	downregulated	-0.688291	0	0
hsa-miR-29c-3p	ZIC5	downregulated	-0.729062	0	0
hsa-miR-3120-5p	A1CF	upregulated	-0.903372	0	0
hsa-miR-3120-5p	ABRA	upregulated	-0.666226	0	0
hsa-miR-3120-5p	ACSM2A	upregulated	-0.898184	0	0
hsa-miR-3120-5p	ADAMTSL1	upregulated	-0.547604	5.39447e-204	1.86119e-203
hsa-miR-3120-5p	ADCY1	upregulated	-0.943707	0	0
hsa-miR-3120-5p	ADCY5	upregulated	-0.684928	0	0
hsa-miR-3120-5p	ADGRF5	upregulated	-0.634835	4.1489e-294	1.86712e-293
hsa-miR-3120-5p	AKR1D1	upregulated	-0.560992	4.11571e-216	1.4691e-215
hsa-miR-3120-5p	AMER3	upregulated	-0.613952	6.18005e-270	2.59392e-269
hsa-miR-3120-5p	ANGPTL1	upregulated	-0.581185	1.80286e-235	6.82784e-235
hsa-miR-3120-5p	ANTXR1	upregulated	-0.651827	0	0
hsa-miR-3120-5p	ARC	upregulated	-0.606952	3.11359e-262	1.27949e-261
hsa-miR-3120-5p	ARHGAP36	upregulated	-0.571365	6.89073e-226	2.53362e-225
hsa-miR-3120-5p	ASPN	upregulated	-0.907344	0	0
hsa-miR-3120-5p	ATP6V0D2	upregulated	-0.620375	3.55313e-277	1.53096e-276
hsa-miR-3120-5p	AZGP1	upregulated	-0.607194	1.6985e-262	6.98156e-262
hsa-miR-3120-5p	B3GALT5	upregulated	-0.943273	0	0
hsa-miR-3120-5p	BMP8A	upregulated	-0.509489	2.38609e-172	7.53416e-172
hsa-miR-3120-5p	BSND	upregulated	-0.690397	0	0
hsa-miR-3120-5p	C1QTNF7	upregulated	-0.909799	0	0
hsa-miR-3120-5p	CALN1	upregulated	-0.843024	0	0
hsa-miR-3120-5p	CASQ2	upregulated	-0.589001	2.46826e-243	9.5527e-243
hsa-miR-3120-5p	CCDC74A	upregulated	-0.628777	6.61958e-287	2.93005e-286
hsa-miR-3120-5p	CD276	upregulated	-0.594276	9.17493e-249	3.6089e-248
hsa-miR-3120-5p	CDH4	upregulated	-0.841518	0	0
hsa-miR-3120-5p	CHRNB3	upregulated	-0.63778	1.1441e-297	5.19883e-297
hsa-miR-3120-5p	CHST3	upregulated	-0.618786	2.28019e-275	9.75865e-275
hsa-miR-3120-5p	COL15A1	upregulated	-0.841586	0	0
hsa-miR-3120-5p	COL5A1	upregulated	-0.843416	0	0
hsa-miR-3120-5p	CPA4	upregulated	-0.590959	2.44273e-245	9.51414e-245
hsa-miR-3120-5p	CRH	upregulated	-0.51774	7.33726e-179	2.35941e-178
hsa-miR-3120-5p	CSMD2	upregulated	-0.916301	0	0
hsa-miR-3120-5p	CST1	upregulated	-0.595643	3.45357e-250	1.36554e-249
hsa-miR-3120-5p	DAB2IP	upregulated	-0.844127	0	0
hsa-miR-3120-5p	DPYSL5	upregulated	-0.72004	0	0
hsa-miR-3120-5p	DSCAM	upregulated	-0.514655	2.09525e-176	6.70101e-176
hsa-miR-3120-5p	DSCAML1	upregulated	-0.800544	0	0
hsa-miR-3120-5p	EDNRA	upregulated	-0.512585	9.02135e-175	2.87018e-174
hsa-miR-3120-5p	EGFR	upregulated	-0.618662	3.14785e-275	1.34684e-274
hsa-miR-3120-5p	ELOVL2	upregulated	-0.575435	8.05566e-230	2.99941e-229
hsa-miR-3120-5p	EPN3	upregulated	-0.907812	0	0
hsa-miR-3120-5p	F7	upregulated	-0.840429	0	0
hsa-miR-3120-5p	FAT3	upregulated	-0.521017	1.69414e-181	5.50232e-181
hsa-miR-3120-5p	FLG2	upregulated	-0.910225	0	0
hsa-miR-3120-5p	FOLH1	upregulated	-0.717001	0	0
hsa-miR-3120-5p	FOXI2	upregulated	-0.620738	1.37091e-277	5.91331e-277
hsa-miR-3120-5p	FRAS1	upregulated	-0.902047	0	0
hsa-miR-3120-5p	FREM2	upregulated	-0.513734	1.11977e-175	3.56973e-175
hsa-miR-3120-5p	FRMPD4	upregulated	-0.910252	0	0
hsa-miR-3120-5p	FZD10	upregulated	-0.901237	0	0
hsa-miR-3120-5p	GABBR2	upregulated	-0.544608	2.33872e-201	8.01162e-201
hsa-miR-3120-5p	GHR	upregulated	-0.586818	4.07352e-241	1.56549e-240
hsa-miR-3120-5p	GJA1	upregulated	-0.582973	2.99007e-237	1.13701e-236
hsa-miR-3120-5p	GRIN2A	upregulated	-0.906814	0	0
hsa-miR-3120-5p	GRIN2B	upregulated	-0.94402	0	0
hsa-miR-3120-5p	GSC	upregulated	-0.843417	0	0
hsa-miR-3120-5p	HEYL	upregulated	-0.543815	1.15333e-200	3.94581e-200
hsa-miR-3120-5p	HIF3A	upregulated	-0.904204	0	0
hsa-miR-3120-5p	HMX1	upregulated	-0.549983	4.15795e-206	1.44366e-205
hsa-miR-3120-5p	HNF4A	upregulated	-0.91114	0	0
hsa-miR-3120-5p	HOXB13	upregulated	-0.597697	2.4321e-252	9.70092e-252
hsa-miR-3120-5p	HSPB7	upregulated	-0.650416	0	0
hsa-miR-3120-5p	HSPB8	upregulated	-0.686649	0	0
hsa-miR-3120-5p	HTR5A	upregulated	-0.915738	0	0
hsa-miR-3120-5p	HTR5A-AS1	upregulated	-0.618424	5.85772e-275	2.50359e-274
hsa-miR-3120-5p	IGDCC4	upregulated	-0.943576	0	0
hsa-miR-3120-5p	IGFBP5	upregulated	-0.907668	0	0
hsa-miR-3120-5p	IL17RD	upregulated	-0.663346	0	0
hsa-miR-3120-5p	IRX5	upregulated	-0.511764	3.98097e-174	1.26429e-173
hsa-miR-3120-5p	JPH3	upregulated	-0.91109	0	0
hsa-miR-3120-5p	KCNE4	upregulated	-0.634729	5.56326e-294	2.50221e-293
hsa-miR-3120-5p	KCNJ9	upregulated	-0.580028	2.52094e-234	9.52017e-234
hsa-miR-3120-5p	KIAA1755	upregulated	-0.500063	3.98884e-165	1.22968e-164
hsa-miR-3120-5p	KIF1A	upregulated	-0.711039	0	0
hsa-miR-3120-5p	KIRREL1	upregulated	-0.717461	0	0
hsa-miR-3120-5p	KLK10	upregulated	-0.607679	5.04379e-263	2.07589e-262
hsa-miR-3120-5p	KLK7	upregulated	-0.608604	4.9301e-264	2.03384e-263
hsa-miR-3120-5p	KRT82	upregulated	-0.600942	9.0163e-256	3.63096e-255
hsa-miR-3120-5p	LIPG	upregulated	-0.905086	0	0
hsa-miR-3120-5p	LMX1A	upregulated	-0.616326	1.36221e-272	5.77704e-272
hsa-miR-3120-5p	LMX1B	upregulated	-0.661597	0	0
hsa-miR-3120-5p	LRAT	upregulated	-0.906584	0	0
hsa-miR-3120-5p	LRRC15	upregulated	-0.599201	6.31456e-254	2.52948e-253
hsa-miR-3120-5p	LRTM2	upregulated	-0.55782	3.43428e-213	1.21848e-212
hsa-miR-3120-5p	MC2R	upregulated	-0.550723	9.06977e-207	3.15734e-206
hsa-miR-3120-5p	MUC6	upregulated	-0.584023	2.66416e-238	1.01551e-237
hsa-miR-3120-5p	MYOCD	upregulated	-0.547994	2.43558e-204	8.41232e-204
hsa-miR-3120-5p	NALF2	upregulated	-0.590628	5.35143e-245	2.08177e-244
hsa-miR-3120-5p	NOS1	upregulated	-0.605639	8.25072e-261	3.37829e-260
hsa-miR-3120-5p	NPAP1	upregulated	-0.691032	0	0
hsa-miR-3120-5p	NPAS3	upregulated	-0.837424	0	0
hsa-miR-3120-5p	NPVF	upregulated	-0.674228	0	0
hsa-miR-3120-5p	NR2E1	upregulated	-0.546196	9.43052e-203	3.24244e-202
hsa-miR-3120-5p	NRK	upregulated	-0.915645	0	0
hsa-miR-3120-5p	NTM	upregulated	-0.90176	0	0
hsa-miR-3120-5p	ONECUT2	upregulated	-0.913156	0	0
hsa-miR-3120-5p	PAPPA	upregulated	-0.673071	0	0
hsa-miR-3120-5p	PEG3	upregulated	-0.943121	0	0
hsa-miR-3120-5p	PKP1	upregulated	-0.912163	0	0
hsa-miR-3120-5p	PLA2G4D	upregulated	-0.586147	1.94364e-240	7.46236e-240
hsa-miR-3120-5p	PLA2R1	upregulated	-0.547667	4.74071e-204	1.63599e-203
hsa-miR-3120-5p	PLEKHG4B	upregulated	-0.903301	0	0
hsa-miR-3120-5p	PMP2	upregulated	-0.56448	2.32365e-219	8.36376e-219
hsa-miR-3120-5p	POTEM	upregulated	-0.690817	0	0
hsa-miR-3120-5p	POU2F3	upregulated	-0.908403	0	0
hsa-miR-3120-5p	PPM1E	upregulated	-0.546432	5.83525e-203	2.00761e-202
hsa-miR-3120-5p	PRIMA1	upregulated	-0.664905	0	0
hsa-miR-3120-5p	PTPN14	upregulated	-0.84087	0	0
hsa-miR-3120-5p	PTPN21	upregulated	-0.885346	0	0
hsa-miR-3120-5p	PTPN5	upregulated	-0.908787	0	0
hsa-miR-3120-5p	RASGRF1	upregulated	-0.799571	0	0
hsa-miR-3120-5p	RBFOX1	upregulated	-0.907949	0	0
hsa-miR-3120-5p	RBP3	upregulated	-0.738561	0	0
hsa-miR-3120-5p	RHBDL3	upregulated	-0.898604	0	0
hsa-miR-3120-5p	SAMD5	upregulated	-0.894467	0	0
hsa-miR-3120-5p	SCN3B	upregulated	-0.511584	5.50442e-174	1.74741e-173
hsa-miR-3120-5p	SEMA6D	upregulated	-0.88741	0	0
hsa-miR-3120-5p	SHC3	upregulated	-0.843547	0	0
hsa-miR-3120-5p	SHC4	upregulated	-0.839227	0	0
hsa-miR-3120-5p	SIX3	upregulated	-0.564986	7.79717e-220	2.81098e-219
hsa-miR-3120-5p	SLC15A1	upregulated	-0.927957	0	0
hsa-miR-3120-5p	SLC17A4	upregulated	-0.584989	2.85222e-239	1.09138e-238
hsa-miR-3120-5p	SLC1A2	upregulated	-0.84155	0	0
hsa-miR-3120-5p	SLC34A2	upregulated	-0.749935	0	0
hsa-miR-3120-5p	SLC7A14	upregulated	-0.635944	1.91247e-295	8.64336e-295
hsa-miR-3120-5p	SNTN	upregulated	-0.909551	0	0
hsa-miR-3120-5p	SRRM4	upregulated	-0.914978	0	0
hsa-miR-3120-5p	ST8SIA3	upregulated	-0.627993	5.51341e-286	2.43095e-285
hsa-miR-3120-5p	STEAP2	upregulated	-0.619908	1.20915e-276	5.19445e-276
hsa-miR-3120-5p	TBX15	upregulated	-0.573755	3.43373e-228	1.27165e-227
hsa-miR-3120-5p	TCF21	upregulated	-0.669406	0	0
hsa-miR-3120-5p	TLX1	upregulated	-0.748948	0	0
hsa-miR-3120-5p	TMEM184A	upregulated	-0.912118	0	0
hsa-miR-3120-5p	TMPRSS11BNL	upregulated	-0.65867	0	0
hsa-miR-3120-5p	TSPAN11	upregulated	-0.626941	9.38592e-285	4.12125e-284
hsa-miR-3120-5p	UGT1A4	upregulated	-0.699273	0	0
hsa-miR-3120-5p	UGT1A6	upregulated	-0.660589	0	0
hsa-miR-3120-5p	UGT1A7	upregulated	-0.912238	0	0
hsa-miR-3120-5p	UGT1A9	upregulated	-0.740035	0	0
hsa-miR-3143	ABI3BP	downregulated	-0.854556	0	0
hsa-miR-3143	ABRA	downregulated	-0.658288	0	0
hsa-miR-3143	AMOTL2	downregulated	-0.936389	0	0
hsa-miR-3143	ANGPT2	downregulated	-0.815087	0	0
hsa-miR-3143	ANGPTL1	downregulated	-0.7408	0	0
hsa-miR-3143	ANTXR1	downregulated	-0.674347	0	0
hsa-miR-3143	ATP6V0D2	downregulated	-0.694255	0	0
hsa-miR-3143	BOLL	downregulated	-0.662178	0	0
hsa-miR-3143	CDC20B	downregulated	-0.614718	8.64003e-271	3.64086e-270
hsa-miR-3143	CDH6	downregulated	-0.808144	0	0
hsa-miR-3143	COL14A1	downregulated	-0.642472	2.0146e-303	9.30875e-303
hsa-miR-3143	COL4A2	downregulated	-0.765384	0	0
hsa-miR-3143	CSRP3	downregulated	-0.762829	0	0
hsa-miR-3143	CXCL12	downregulated	-0.839331	0	0
hsa-miR-3143	CYP26A1	downregulated	-0.722623	0	0
hsa-miR-3143	CYP26B1	downregulated	-0.825278	0	0
hsa-miR-3143	DCX	downregulated	-0.76239	0	0
hsa-miR-3143	DKK1	downregulated	-0.878906	0	0
hsa-miR-3143	DLX3	downregulated	-0.873377	0	0
hsa-miR-3143	DLX5	downregulated	-0.730437	0	0
hsa-miR-3143	DMRT3	downregulated	-0.724865	0	0
hsa-miR-3143	DMRTA2	downregulated	-0.594086	1.4452e-248	5.67899e-248
hsa-miR-3143	DPT	downregulated	-0.724099	0	0
hsa-miR-3143	EDIL3	downregulated	-0.865529	0	0
hsa-miR-3143	EDNRA	downregulated	-0.701295	0	0
hsa-miR-3143	EFR3B	downregulated	-0.832509	0	0
hsa-miR-3143	ELOVL2	downregulated	-0.757035	0	0
hsa-miR-3143	EMP2	downregulated	-0.85047	0	0
hsa-miR-3143	ESYT3	downregulated	-0.769016	0	0
hsa-miR-3143	FARP1	downregulated	-0.856068	0	0
hsa-miR-3143	FAXC	downregulated	-0.821402	0	0
hsa-miR-3143	FREM2	downregulated	-0.812584	0	0
hsa-miR-3143	GABRA4	downregulated	-0.611517	3.10671e-267	1.29405e-266
hsa-miR-3143	GABRB3	downregulated	-0.650812	0	0
hsa-miR-3143	GALR1	downregulated	-0.810925	0	0
hsa-miR-3143	GDF6	downregulated	-0.616223	1.77862e-272	7.54097e-272
hsa-miR-3143	GFRA1	downregulated	-0.741728	0	0
hsa-miR-3143	GLT6D1	downregulated	-0.777727	0	0
hsa-miR-3143	GNA14	downregulated	-0.736818	0	0
hsa-miR-3143	GNG12	downregulated	-0.664474	0	0
hsa-miR-3143	GPX8	downregulated	-0.669911	0	0
hsa-miR-3143	GREM1	downregulated	-0.735771	0	0
hsa-miR-3143	GRM5	downregulated	-0.649008	0	0
hsa-miR-3143	GRM8	downregulated	-0.665167	0	0
hsa-miR-3143	HMGA2	downregulated	-0.8641	0	0
hsa-miR-3143	HOXC13	downregulated	-0.754996	0	0
hsa-miR-3143	HSPA4L	downregulated	-0.865157	0	0
hsa-miR-3143	HSPB8	downregulated	-0.645107	1.06956e-306	4.98994e-306
hsa-miR-3143	HTR2A	downregulated	-0.898242	0	0
hsa-miR-3143	ID4	downregulated	-0.858814	0	0
hsa-miR-3143	IL17RD	downregulated	-0.668232	0	0
hsa-miR-3143	KCNA1	downregulated	-0.694338	0	0
hsa-miR-3143	KCNB2	downregulated	-0.841558	0	0
hsa-miR-3143	KCNS2	downregulated	-0.782974	0	0
hsa-miR-3143	KCTD8	downregulated	-0.655634	0	0
hsa-miR-3143	KSR2	downregulated	-0.865057	0	0
hsa-miR-3143	LHX1	downregulated	-0.840488	0	0
hsa-miR-3143	LRCH2	downregulated	-0.693684	0	0
hsa-miR-3143	LYPD6	downregulated	-0.610953	1.3031e-266	5.41796e-266
hsa-miR-3143	MN1	downregulated	-0.85849	0	0
hsa-miR-3143	MUC13	downregulated	-0.540941	3.63046e-198	1.23488e-197
hsa-miR-3143	MYT1L	downregulated	-0.890206	0	0
hsa-miR-3143	NPVF	downregulated	-0.654875	0	0
hsa-miR-3143	NPY1R	downregulated	-0.827828	0	0
hsa-miR-3143	NWD2	downregulated	-0.653454	0	0
hsa-miR-3143	OPRK1	downregulated	-0.602366	2.72691e-257	1.10347e-256
hsa-miR-3143	OTX2	downregulated	-0.717836	0	0
hsa-miR-3143	PALM2AKAP2	downregulated	-0.707152	0	0
hsa-miR-3143	PAX9	downregulated	-0.855842	0	0
hsa-miR-3143	PCDH8	downregulated	-0.887079	0	0
hsa-miR-3143	PIEZO2	downregulated	-0.790472	0	0
hsa-miR-3143	PPM1E	downregulated	-0.758747	0	0
hsa-miR-3143	PPP2R2C	downregulated	-0.705108	0	0
hsa-miR-3143	PRKAA2	downregulated	-0.82423	0	0
hsa-miR-3143	PRR15	downregulated	-0.759042	0	0
hsa-miR-3143	PWWP3B	downregulated	-0.685795	0	0
hsa-miR-3143	REG3G	downregulated	-0.574	1.98982e-228	7.37768e-228
hsa-miR-3143	SCN1A	downregulated	-0.885888	0	0
hsa-miR-3143	SEMA6A	downregulated	-0.857154	0	0
hsa-miR-3143	SEPTIN14	downregulated	-0.724543	0	0
hsa-miR-3143	SFRP4	downregulated	-0.637276	4.67924e-297	2.12504e-296
hsa-miR-3143	SLC26A9	downregulated	-0.752377	0	0
hsa-miR-3143	SLC2A2	downregulated	-0.764981	0	0
hsa-miR-3143	SLC30A8	downregulated	-0.734681	0	0
hsa-miR-3143	SLC7A14	downregulated	-0.697046	0	0
hsa-miR-3143	SLCO2A1	downregulated	-0.869731	0	0
hsa-miR-3143	SOX11	downregulated	-0.817387	0	0
hsa-miR-3143	SOX3	downregulated	-0.724849	0	0
hsa-miR-3143	ST6GAL2	downregulated	-0.766393	0	0
hsa-miR-3143	ST8SIA2	downregulated	-0.681838	0	0
hsa-miR-3143	ST8SIA3	downregulated	-0.705541	0	0
hsa-miR-3143	ST8SIA5	downregulated	-0.855923	0	0
hsa-miR-3143	STC1	downregulated	-0.783604	0	0
hsa-miR-3143	STEAP2	downregulated	-0.698584	0	0
hsa-miR-3143	TBX15	downregulated	-0.765522	0	0
hsa-miR-3143	TEAD1	downregulated	-0.789107	0	0
hsa-miR-3143	TFAP2A	downregulated	-0.826872	0	0
hsa-miR-3143	TRIL	downregulated	-0.701058	0	0
hsa-miR-3143	TSPAN12	downregulated	-0.894657	0	0
hsa-miR-3143	UNC5D	downregulated	-0.592907	2.40407e-247	9.40737e-247
hsa-miR-3143	WNT3A	downregulated	-0.733733	0	0
hsa-miR-3143	ZBTB8B	downregulated	-0.846687	0	0
hsa-miR-3143	ZNF750	downregulated	-0.5341	2.57011e-192	8.64041e-192
hsa-miR-34a-5p	ADRA1D	upregulated	-0.901141	0	0
hsa-miR-34a-5p	AGTR1	upregulated	-0.691711	0	0
hsa-miR-34a-5p	AMER2	upregulated	-0.828238	0	0
hsa-miR-34a-5p	ARHGAP36	upregulated	-0.851991	0	0
hsa-miR-34a-5p	ASB4	upregulated	-0.774468	0	0
hsa-miR-34a-5p	BMP7	upregulated	-0.853692	0	0
hsa-miR-34a-5p	BRINP1	upregulated	-0.855843	0	0
hsa-miR-34a-5p	C2CD4A	upregulated	-0.635525	6.12576e-295	2.76381e-294
hsa-miR-34a-5p	CAPN6	upregulated	-0.662138	0	0
hsa-miR-34a-5p	CBLN4	upregulated	-0.875023	0	0
hsa-miR-34a-5p	CCN5	upregulated	-0.865019	0	0
hsa-miR-34a-5p	CDH13	upregulated	-0.589153	1.72665e-243	6.69228e-243
hsa-miR-34a-5p	CHST3	upregulated	-0.814496	0	0
hsa-miR-34a-5p	CNTN2	upregulated	-0.850711	0	0
hsa-miR-34a-5p	COL12A1	upregulated	-0.555213	8.18339e-211	2.88799e-210
hsa-miR-34a-5p	CPLX2	upregulated	-0.851225	0	0
hsa-miR-34a-5p	CRHR1	upregulated	-0.662064	0	0
hsa-miR-34a-5p	CSRNP3	upregulated	-0.779131	0	0
hsa-miR-34a-5p	CTNND2	upregulated	-0.925311	0	0
hsa-miR-34a-5p	DCX	upregulated	-0.837562	0	0
hsa-miR-34a-5p	DKK1	upregulated	-0.866964	0	0
hsa-miR-34a-5p	ELMOD1	upregulated	-0.781534	0	0
hsa-miR-34a-5p	ESYT3	upregulated	-0.663923	0	0
hsa-miR-34a-5p	FAM107A	upregulated	-0.679842	0	0
hsa-miR-34a-5p	FAT3	upregulated	-0.932377	0	0
hsa-miR-34a-5p	FGF23	upregulated	-0.698062	0	0
hsa-miR-34a-5p	FLRT2	upregulated	-0.666298	0	0
hsa-miR-34a-5p	FOXQ1	upregulated	-0.599534	2.80899e-254	1.1275e-253
hsa-miR-34a-5p	FRMD5	upregulated	-0.588898	3.14359e-243	1.21634e-242
hsa-miR-34a-5p	GABBR2	upregulated	-0.950894	0	0
hsa-miR-34a-5p	GABRA3	upregulated	-0.858248	0	0
hsa-miR-34a-5p	GATA4	upregulated	-0.779338	0	0
hsa-miR-34a-5p	GDAP1L1	upregulated	-0.867343	0	0
hsa-miR-34a-5p	GPR22	upregulated	-0.619915	1.18844e-276	5.10683e-276
hsa-miR-34a-5p	GRHL2	upregulated	-0.670852	0	0
hsa-miR-34a-5p	GRM7	upregulated	-0.67346	0	0
hsa-miR-34a-5p	HMGA2	upregulated	-0.650256	0	0
hsa-miR-34a-5p	HNF4A	upregulated	-0.646663	0	5.62581e-308
hsa-miR-34a-5p	HOTAIR	upregulated	-0.818726	0	0
hsa-miR-34a-5p	HOXA13	upregulated	-0.520521	4.26244e-181	1.38043e-180
hsa-miR-34a-5p	HOXB8	upregulated	-0.890275	0	0
hsa-miR-34a-5p	IGF2BP1	upregulated	-0.846358	0	0
hsa-miR-34a-5p	IGSF1	upregulated	-0.66768	0	0
hsa-miR-34a-5p	IL17RD	upregulated	-0.702673	0	0
hsa-miR-34a-5p	ITGA11	upregulated	-0.658143	0	0
hsa-miR-34a-5p	JCAD	upregulated	-0.701757	0	0
hsa-miR-34a-5p	JPH1	upregulated	-0.912888	0	0
hsa-miR-34a-5p	KCNH1	upregulated	-0.674506	0	0
hsa-miR-34a-5p	KCNIP1	upregulated	-0.643486	1.1165e-304	5.174e-304
hsa-miR-34a-5p	KCNK3	upregulated	-0.6757	0	0
hsa-miR-34a-5p	KDR	upregulated	-0.824316	0	0
hsa-miR-34a-5p	KIAA1210	upregulated	-0.875004	0	0
hsa-miR-34a-5p	KIAA1217	upregulated	-0.713316	0	0
hsa-miR-34a-5p	KLB	upregulated	-0.821909	0	0
hsa-miR-34a-5p	KSR2	upregulated	-0.652176	0	0
hsa-miR-34a-5p	LGI1	upregulated	-0.769858	0	0
hsa-miR-34a-5p	LHX2	upregulated	-0.852244	0	0
hsa-miR-34a-5p	LIN28B	upregulated	-0.670173	0	0
hsa-miR-34a-5p	LRCH2	upregulated	-0.768098	0	0
hsa-miR-34a-5p	LRRC55	upregulated	-0.862153	0	0
hsa-miR-34a-5p	MAGEA12	upregulated	-0.66319	0	0
hsa-miR-34a-5p	MAGEA3	upregulated	-0.833218	0	0
hsa-miR-34a-5p	MCIDAS	upregulated	-0.638497	1.53234e-298	6.98496e-298
hsa-miR-34a-5p	MGAT5B	upregulated	-0.555099	1.03898e-210	3.66259e-210
hsa-miR-34a-5p	MMP2	upregulated	-0.692585	0	0
hsa-miR-34a-5p	MYOCD	upregulated	-0.879524	0	0
hsa-miR-34a-5p	MYRIP	upregulated	-0.648113	0	0
hsa-miR-34a-5p	NPNT	upregulated	-0.690321	0	0
hsa-miR-34a-5p	OLFML1	upregulated	-0.829724	0	0
hsa-miR-34a-5p	OLIG3	upregulated	-0.587643	5.93577e-242	2.28559e-241
hsa-miR-34a-5p	ONECUT2	upregulated	-0.648579	0	0
hsa-miR-34a-5p	OPCML	upregulated	-0.914302	0	0
hsa-miR-34a-5p	PDE11A	upregulated	-0.860614	0	0
hsa-miR-34a-5p	PEX5L	upregulated	-0.712697	0	0
hsa-miR-34a-5p	PTCHD1	upregulated	-0.692766	0	0
hsa-miR-34a-5p	PTGIS	upregulated	-0.678036	0	0
hsa-miR-34a-5p	RARB	upregulated	-0.546004	1.39072e-202	4.7775e-202
hsa-miR-34a-5p	RSPO4	upregulated	-0.668454	0	0
hsa-miR-34a-5p	SAA1	upregulated	-0.624536	5.88343e-282	2.56282e-281
hsa-miR-34a-5p	SCN1A	upregulated	-0.823114	0	0
hsa-miR-34a-5p	SEMA5B	upregulated	-0.908637	0	0
hsa-miR-34a-5p	SHANK3	upregulated	-0.794624	0	0
hsa-miR-34a-5p	SHISAL1	upregulated	-0.925219	0	0
hsa-miR-34a-5p	SIX3	upregulated	-0.869985	0	0
hsa-miR-34a-5p	SLC6A1	upregulated	-0.853612	0	0
hsa-miR-34a-5p	SLC6A17	upregulated	-0.624	2.45385e-281	1.06685e-280
hsa-miR-34a-5p	SLC7A2	upregulated	-0.519039	6.65896e-180	2.14738e-179
hsa-miR-34a-5p	SLCO2A1	upregulated	-0.759825	0	0
hsa-miR-34a-5p	SNAP25	upregulated	-0.679091	0	0
hsa-miR-34a-5p	SPAM1	upregulated	-0.52745	9.2994e-187	3.0801e-186
hsa-miR-34a-5p	SPRN	upregulated	-0.618888	1.74662e-275	7.48317e-275
hsa-miR-34a-5p	SSX5	upregulated	-0.85484	0	0
hsa-miR-34a-5p	ST8SIA3	upregulated	-0.828522	0	0
hsa-miR-34a-5p	STC1	upregulated	-0.747062	0	0
hsa-miR-34a-5p	STC2	upregulated	-0.855793	0	0
hsa-miR-34a-5p	SYT9	upregulated	-0.849344	0	0
hsa-miR-34a-5p	THSD4	upregulated	-0.917135	0	0
hsa-miR-34a-5p	TMEM35A	upregulated	-0.762585	0	0
hsa-miR-34a-5p	TNRC18P2	upregulated	-0.623457	1.03879e-280	4.51259e-280
hsa-miR-34a-5p	TP73	upregulated	-0.919249	0	0
hsa-miR-34a-5p	TRIM67	upregulated	-0.670316	0	0
hsa-miR-34a-5p	UNC13C	upregulated	-0.713868	0	0
hsa-miR-34a-5p	VWA5B2	upregulated	-0.809952	0	0
hsa-miR-34a-5p	ZIC5	upregulated	-0.80857	0	0
hsa-miR-3611	DIRAS3	downregulated	-0.503307	1.38205e-167	4.2998e-167
hsa-miR-3611	EML1	downregulated	-0.532884	2.72583e-191	9.13496e-191
hsa-miR-3611	HECW1	downregulated	-0.532499	5.74065e-191	1.92262e-190
hsa-miR-3611	HMGA2	downregulated	-0.532515	5.56845e-191	1.86534e-190
hsa-miR-3611	KIAA1217	downregulated	-0.531763	2.38344e-190	7.96902e-190
hsa-miR-3611	KIAA1549	downregulated	-0.530778	1.59235e-189	5.31396e-189
hsa-miR-3611	NFASC	downregulated	-0.528815	6.87177e-188	2.28221e-187
hsa-miR-3611	SCN1A	downregulated	-0.504358	2.17468e-168	6.78573e-168
hsa-miR-3611	TDRD6	downregulated	-0.531952	1.65327e-190	5.53121e-190
hsa-miR-362-3p	ADAD1	downregulated	-0.617867	2.4985e-274	1.06557e-273
hsa-miR-362-3p	ADAM33	downregulated	-0.881375	0	0
hsa-miR-362-3p	ADAMTS9	downregulated	-0.616977	2.52447e-273	1.0729e-272
hsa-miR-362-3p	ADCYAP1	downregulated	-0.711123	0	0
hsa-miR-362-3p	ADGRF5	downregulated	-0.660906	0	0
hsa-miR-362-3p	ADRA2B	downregulated	-0.657046	0	0
hsa-miR-362-3p	AKAIN1	downregulated	-0.578788	4.2166e-233	1.58709e-232
hsa-miR-362-3p	ALDH1A3	downregulated	-0.745233	0	0
hsa-miR-362-3p	ANGPTL2	downregulated	-0.796506	0	0
hsa-miR-362-3p	APOA5	downregulated	-0.743074	0	0
hsa-miR-362-3p	ARHGAP23	downregulated	-0.622151	3.30253e-279	1.42801e-278
hsa-miR-362-3p	ASS1	downregulated	-0.790301	0	0
hsa-miR-362-3p	BMP7	downregulated	-0.701334	0	0
hsa-miR-362-3p	C2orf72	downregulated	-0.755038	0	0
hsa-miR-362-3p	CACNA1B	downregulated	-0.711747	0	0
hsa-miR-362-3p	CCDC160	downregulated	-0.67172	0	0
hsa-miR-362-3p	CCDC169	downregulated	-0.634677	6.42081e-294	2.88709e-293
hsa-miR-362-3p	CDH13	downregulated	-0.743647	0	0
hsa-miR-362-3p	CDH6	downregulated	-0.644443	7.19853e-306	3.35348e-305
hsa-miR-362-3p	CHD5	downregulated	-0.623825	3.90112e-281	1.6956e-280
hsa-miR-362-3p	CLRN1	downregulated	-0.692711	0	0
hsa-miR-362-3p	CPA4	downregulated	-0.656107	0	0
hsa-miR-362-3p	CPLX2	downregulated	-0.852756	0	0
hsa-miR-362-3p	CRB2	downregulated	-0.899278	0	0
hsa-miR-362-3p	CSRNP3	downregulated	-0.653123	0	0
hsa-miR-362-3p	CXCL12	downregulated	-0.748443	0	0
hsa-miR-362-3p	DCX	downregulated	-0.706686	0	0
hsa-miR-362-3p	DKK1	downregulated	-0.769589	0	0
hsa-miR-362-3p	DPYSL3	downregulated	-0.856686	0	0
hsa-miR-362-3p	DPYSL5	downregulated	-0.593478	6.16951e-248	2.42074e-247
hsa-miR-362-3p	EBF2	downregulated	-0.664001	0	0
hsa-miR-362-3p	EFR3B	downregulated	-0.735653	0	0
hsa-miR-362-3p	EGFLAM	downregulated	-0.669311	0	0
hsa-miR-362-3p	EPB41L4B	downregulated	-0.867148	0	0
hsa-miR-362-3p	F9	downregulated	-0.701699	0	0
hsa-miR-362-3p	FAM216B	downregulated	-0.63991	2.87122e-300	1.31484e-299
hsa-miR-362-3p	FAM43B	downregulated	-0.605872	4.61639e-261	1.89264e-260
hsa-miR-362-3p	FAT3	downregulated	-0.698927	0	0
hsa-miR-362-3p	FAXC	downregulated	-0.721496	0	0
hsa-miR-362-3p	FEZF1	downregulated	-0.673364	0	0
hsa-miR-362-3p	FIBIN	downregulated	-0.622085	3.92719e-279	1.69765e-278
hsa-miR-362-3p	FOXI2	downregulated	-0.790347	0	0
hsa-miR-362-3p	FOXL1	downregulated	-0.743581	0	0
hsa-miR-362-3p	FOXL2NB	downregulated	-0.674691	0	0
hsa-miR-362-3p	GADL1	downregulated	-0.705759	0	0
hsa-miR-362-3p	GAGE1	downregulated	-0.657707	0	0
hsa-miR-362-3p	GALNT17	downregulated	-0.584546	7.96265e-239	3.04027e-238
hsa-miR-362-3p	GLDN	downregulated	-0.926708	0	0
hsa-miR-362-3p	GNA14	downregulated	-0.81176	0	0
hsa-miR-362-3p	GPC4	downregulated	-0.576245	1.30835e-230	4.8875e-230
hsa-miR-362-3p	GPR78	downregulated	-0.741652	0	0
hsa-miR-362-3p	GPX6	downregulated	-0.695878	0	0
hsa-miR-362-3p	GREB1L	downregulated	-0.848295	0	0
hsa-miR-362-3p	GRIK3	downregulated	-0.602758	1.04008e-257	4.22277e-257
hsa-miR-362-3p	HOXC10	downregulated	-0.649626	0	0
hsa-miR-362-3p	HS6ST3	downregulated	-0.642198	4.39916e-303	2.02974e-302
hsa-miR-362-3p	IGF1	downregulated	-0.603577	1.37545e-258	5.60296e-258
hsa-miR-362-3p	IGF2	downregulated	-0.761411	0	0
hsa-miR-362-3p	IRX3	downregulated	-0.57443	7.62484e-229	2.83038e-228
hsa-miR-362-3p	IYD	downregulated	-0.727892	0	0
hsa-miR-362-3p	JPH2	downregulated	-0.851551	0	0
hsa-miR-362-3p	KCNJ12	downregulated	-0.899714	0	0
hsa-miR-362-3p	KCNJ6	downregulated	-0.794002	0	0
hsa-miR-362-3p	KCNS2	downregulated	-0.706154	0	0
hsa-miR-362-3p	KIAA1217	downregulated	-0.898493	0	0
hsa-miR-362-3p	KIRREL1	downregulated	-0.619788	1.65617e-276	7.11095e-276
hsa-miR-362-3p	KRTAP4-9	downregulated	-0.629225	1.96622e-287	8.71042e-287
hsa-miR-362-3p	KSR2	downregulated	-0.929555	0	0
hsa-miR-362-3p	LMOD2	downregulated	-0.633204	3.74167e-292	1.67768e-291
hsa-miR-362-3p	LMX1A	downregulated	-0.561463	1.50953e-216	5.39677e-216
hsa-miR-362-3p	LMX1B	downregulated	-0.633048	5.75264e-292	2.57645e-291
hsa-miR-362-3p	LRRC31	downregulated	-0.655311	0	0
hsa-miR-362-3p	LRRC32	downregulated	-0.650221	0	0
hsa-miR-362-3p	LRRC38	downregulated	-0.83122	0	0
hsa-miR-362-3p	MC2R	downregulated	-0.643817	4.32427e-305	2.00684e-304
hsa-miR-362-3p	MET	downregulated	-0.536624	1.85131e-194	6.25299e-194
hsa-miR-362-3p	MS4A15	downregulated	-0.717609	0	0
[truncated: 3,160 more rows]

## Sheet: Severe Stage
microRNA	Target	microRNA.Direction	Corr.Coefficient	Corr.P.Value	Corr.Adjusted.P.Val
hsa-miR-126-5p	A2ML1	downregulated	-0.538258	7.41919e-196	2.66737e-195
hsa-miR-126-5p	ADGRL2	downregulated	-0.590731	4.18741e-245	1.77535e-244
hsa-miR-126-5p	ADGRL3	downregulated	-0.89087	0	0
hsa-miR-126-5p	CSRNP3	downregulated	-0.679752	0	0
hsa-miR-126-5p	CYS1	downregulated	-0.698423	0	0
hsa-miR-126-5p	DGKB	downregulated	-0.702602	0	0
hsa-miR-126-5p	ELAVL3	downregulated	-0.742066	0	0
hsa-miR-126-5p	EYA4	downregulated	-0.659728	0	0
hsa-miR-126-5p	GABRA4	downregulated	-0.605801	5.5088e-261	2.50319e-260
hsa-miR-126-5p	GRIA2	downregulated	-0.85606	0	0
hsa-miR-126-5p	HAPLN1	downregulated	-0.518105	3.74419e-179	1.29627e-178
hsa-miR-126-5p	HOXB5	downregulated	-0.843068	0	0
hsa-miR-126-5p	HOXC8	downregulated	-0.612044	8.12642e-268	3.82546e-267
hsa-miR-126-5p	KLF17	downregulated	-0.618901	1.68666e-275	8.13491e-275
hsa-miR-126-5p	LRRC3B	downregulated	-0.683945	0	0
hsa-miR-126-5p	LRRTM3	downregulated	-0.716069	0	0
hsa-miR-126-5p	MFAP4	downregulated	-0.694254	0	0
hsa-miR-126-5p	NCAN	downregulated	-0.555551	4.03331e-211	1.52257e-210
hsa-miR-126-5p	NOVA1	downregulated	-0.859637	0	0
hsa-miR-126-5p	PAX2	downregulated	-0.796273	0	0
hsa-miR-126-5p	PRRX1	downregulated	-0.763755	0	0
hsa-miR-126-5p	RFTN2	downregulated	-0.898056	0	0
hsa-miR-126-5p	RUNX1T1	downregulated	-0.857125	0	0
hsa-miR-126-5p	SLC7A14	downregulated	-0.692163	0	0
hsa-miR-126-5p	SULT6B1	downregulated	-0.702265	0	0
hsa-miR-126-5p	SYT10	downregulated	-0.644119	1.82246e-305	9.88255e-305
hsa-miR-126-5p	TBR1	downregulated	-0.751765	0	0
hsa-miR-126-5p	TRDN	downregulated	-0.661516	0	0
hsa-miR-126-5p	UNC5D	downregulated	-0.590639	5.21238e-245	2.20515e-244
hsa-miR-126-5p	WFDC13	downregulated	-0.692093	0	0
hsa-miR-126-5p	ZFHX4	downregulated	-0.633902	5.47895e-293	2.81549e-292
hsa-miR-126-5p	ZIC1	downregulated	-0.556851	2.63965e-212	9.98387e-212
hsa-miR-126-5p	ZIC4	downregulated	-0.64362	7.60873e-305	4.08086e-304
hsa-miR-126-5p	ZIC5	downregulated	-0.730281	0	0
hsa-miR-1262	ABCG4	upregulated	-0.716081	0	0
hsa-miR-1262	ADIPOQ	upregulated	-0.702174	0	0
hsa-miR-1262	AMOTL2	upregulated	-0.777727	0	0
hsa-miR-1262	ANTXR1	upregulated	-0.792067	0	0
hsa-miR-1262	CNTN4	upregulated	-0.712692	0	0
hsa-miR-1262	COL1A1	upregulated	-0.821687	0	0
hsa-miR-1262	CREB3L1	upregulated	-0.77276	0	0
hsa-miR-1262	CSMD3	upregulated	-0.704458	0	0
hsa-miR-1262	CYP1A2	upregulated	-0.725553	0	0
hsa-miR-1262	DCC	upregulated	-0.852774	0	0
hsa-miR-1262	DIO2	upregulated	-0.643913	3.29067e-305	1.77461e-304
hsa-miR-1262	DPF1	upregulated	-0.870864	0	0
hsa-miR-1262	EFEMP1	upregulated	-0.673634	0	0
hsa-miR-1262	EFNB3	upregulated	-0.596687	2.79363e-251	1.22136e-250
hsa-miR-1262	ERBB4	upregulated	-0.740674	0	0
hsa-miR-1262	EXD1	upregulated	-0.645161	9.15351e-307	5.01909e-306
hsa-miR-1262	FERMT1	upregulated	-0.878299	0	0
hsa-miR-1262	FGFR3	upregulated	-0.753471	0	0
hsa-miR-1262	FMOD	upregulated	-0.826034	0	0
hsa-miR-1262	FUT9	upregulated	-0.694738	0	0
hsa-miR-1262	GABRA4	upregulated	-0.630602	4.65903e-289	2.35108e-288
hsa-miR-1262	GALNT9	upregulated	-0.905874	0	0
hsa-miR-1262	GFRA1	upregulated	-0.715579	0	0
hsa-miR-1262	GJC1	upregulated	-0.623514	8.91799e-281	4.3765e-280
hsa-miR-1262	GLYATL2	upregulated	-0.763003	0	0
hsa-miR-1262	GPRC5A	upregulated	-0.644216	1.3796e-305	7.50182e-305
hsa-miR-1262	GPX8	upregulated	-0.676025	0	0
hsa-miR-1262	GSG1L	upregulated	-0.521675	4.96396e-182	1.74005e-181
hsa-miR-1262	HECW1	upregulated	-0.902826	0	0
hsa-miR-1262	HOXC10	upregulated	-0.686246	0	0
hsa-miR-1262	IGF2BP1	upregulated	-0.731226	0	0
hsa-miR-1262	IL20RA	upregulated	-0.708185	0	0
hsa-miR-1262	KCNH5	upregulated	-0.644544	5.39069e-306	2.94761e-305
hsa-miR-1262	KLK10	upregulated	-0.691762	0	0
hsa-miR-1262	KLK15	upregulated	-0.673978	0	0
hsa-miR-1262	LIN28A	upregulated	-0.592762	3.39898e-247	1.4632e-246
hsa-miR-1262	LMOD2	upregulated	-0.679175	0	0
hsa-miR-1262	LRRC10B	upregulated	-0.692556	0	0
hsa-miR-1262	MIOX	upregulated	-0.773076	0	0
hsa-miR-1262	NCCRP1	upregulated	-0.813498	0	0
hsa-miR-1262	NEUROD2	upregulated	-0.670628	0	0
hsa-miR-1262	PCDHB16	upregulated	-0.690433	0	0
hsa-miR-1262	PCDHB7	upregulated	-0.706486	0	0
hsa-miR-1262	PCSK1	upregulated	-0.815486	0	0
hsa-miR-1262	RNASE13	upregulated	-0.714474	0	0
hsa-miR-1262	SALL3	upregulated	-0.691246	0	0
hsa-miR-1262	SLC7A14	upregulated	-0.694636	0	0
hsa-miR-1262	STUM	upregulated	-0.51486	1.44115e-176	4.94576e-176
hsa-miR-1262	SYT15	upregulated	-0.525608	3.06319e-185	1.08148e-184
hsa-miR-1262	SYT2	upregulated	-0.608751	3.40683e-264	1.58099e-263
hsa-miR-1262	TMPRSS4	upregulated	-0.658586	0	0
hsa-miR-1262	TNP2	upregulated	-0.66021	0	0
hsa-miR-1262	ZBTB8B	upregulated	-0.778576	0	0
hsa-miR-144-5p	EPB41L4B	downregulated	-0.520762	2.72282e-181	9.47677e-181
hsa-miR-144-5p	GULP1	downregulated	-0.891948	0	0
hsa-miR-144-5p	HOXA7	downregulated	-0.521338	9.31487e-182	3.25937e-181
hsa-miR-144-5p	ID4	downregulated	-0.50225	8.8174e-167	2.92869e-166
hsa-miR-144-5p	SCN1A	downregulated	-0.521038	1.62929e-181	5.6808e-181
hsa-miR-144-5p	SYT4	downregulated	-0.502676	4.18191e-167	1.39611e-166
hsa-miR-183-5p	RUNX1T1	downregulated	-0.507545	7.68498e-171	2.58758e-170
hsa-miR-199a-3p	ADIPOQ	downregulated	-0.670635	0	0
hsa-miR-199a-3p	CCDC80	downregulated	-0.566931	1.149e-221	4.48407e-221
hsa-miR-199a-3p	EMCN	downregulated	-0.668598	0	0
hsa-miR-199a-3p	ERBB4	downregulated	-0.758173	0	0
hsa-miR-199a-3p	KCND2	downregulated	-0.540427	1.01022e-197	3.66556e-197
hsa-miR-199a-3p	NOL4	downregulated	-0.607734	4.38449e-263	2.00623e-262
hsa-miR-199a-3p	NOVA1	downregulated	-0.642463	2.06572e-303	1.09892e-302
hsa-miR-199a-3p	PHYHIPL	downregulated	-0.535316	2.39567e-193	8.58157e-193
hsa-miR-199a-3p	SYT4	downregulated	-0.698395	0	0
hsa-miR-199a-3p	TRIM72	downregulated	-0.684273	0	0
hsa-miR-199a-3p	WNK2	downregulated	-0.567156	7.03072e-222	2.75475e-221
hsa-miR-199b-3p	ADIPOQ	downregulated	-0.669876	0	0
hsa-miR-199b-3p	CCDC80	downregulated	-0.56789	1.42106e-222	5.59028e-222
hsa-miR-199b-3p	EMCN	downregulated	-0.670189	0	0
hsa-miR-199b-3p	ERBB4	downregulated	-0.758672	0	0
hsa-miR-199b-3p	GRIA2	downregulated	-0.675295	0	0
hsa-miR-199b-3p	KCND2	downregulated	-0.541603	9.70794e-199	3.54213e-198
hsa-miR-199b-3p	NOL4	downregulated	-0.608686	4.01516e-264	1.85891e-263
hsa-miR-199b-3p	NOVA1	downregulated	-0.640159	1.42275e-300	7.46753e-300
hsa-miR-199b-3p	PHYHIPL	downregulated	-0.535612	1.34433e-193	4.82436e-193
hsa-miR-199b-3p	PPM1E	downregulated	-0.544156	5.81151e-201	2.14436e-200
hsa-miR-199b-3p	SYT4	downregulated	-0.698998	0	0
hsa-miR-199b-3p	TRIM72	downregulated	-0.685027	0	0
hsa-miR-199b-3p	WNK2	downregulated	-0.568945	1.41549e-223	5.59076e-223
hsa-miR-3942-5p	AMOTL2	downregulated	-0.598934	1.21151e-253	5.3563e-253
hsa-miR-3942-5p	EPB41L4B	downregulated	-0.50987	1.20292e-172	4.0783e-172
hsa-miR-412-3p	ABCA12	upregulated	-0.650269	0	0
hsa-miR-412-3p	ADGRL2	upregulated	-0.627909	6.92291e-286	3.46675e-285
hsa-miR-412-3p	ANTXR1	upregulated	-0.645568	2.83513e-307	1.55892e-306
hsa-miR-412-3p	ARHGEF15	upregulated	-0.652777	0	0
hsa-miR-412-3p	B4GALNT1	upregulated	-0.908378	0	0
hsa-miR-412-3p	CALCA	upregulated	-0.602392	2.55801e-257	1.13863e-256
hsa-miR-412-3p	CDH10	upregulated	-0.668098	0	0
hsa-miR-412-3p	CDH22	upregulated	-0.904549	0	0
hsa-miR-412-3p	CDX2	upregulated	-0.606271	1.70834e-261	7.79876e-261
hsa-miR-412-3p	COL1A1	upregulated	-0.604847	5.91204e-260	2.66789e-259
hsa-miR-412-3p	DCC	upregulated	-0.558662	5.80672e-214	2.20476e-213
hsa-miR-412-3p	DIO2	upregulated	-0.835995	0	0
hsa-miR-412-3p	EEF1A2	upregulated	-0.505746	1.87455e-169	6.27942e-169
hsa-miR-412-3p	ELAVL3	upregulated	-0.58164	6.37251e-236	2.63352e-235
hsa-miR-412-3p	EPHA3	upregulated	-0.629209	2.05417e-287	1.03129e-286
hsa-miR-412-3p	EPHA7	upregulated	-0.570889	1.97299e-225	7.87192e-225
hsa-miR-412-3p	FAM83C	upregulated	-0.701317	0	0
hsa-miR-412-3p	FLRT2	upregulated	-0.906966	0	0
hsa-miR-412-3p	FOXA1	upregulated	-0.664816	0	0
hsa-miR-412-3p	GRM1	upregulated	-0.564736	1.33778e-219	5.20012e-219
hsa-miR-412-3p	GRM5	upregulated	-0.66651	0	0
hsa-miR-412-3p	HCN4	upregulated	-0.654863	0	0
hsa-miR-412-3p	HOXA13	upregulated	-0.835159	0	0
hsa-miR-412-3p	HOXC11	upregulated	-0.850281	0	0
hsa-miR-412-3p	IGF2BP1	upregulated	-0.567678	2.25705e-222	8.86117e-222
hsa-miR-412-3p	LY6K	upregulated	-0.59186	2.89634e-246	1.23867e-245
hsa-miR-412-3p	MEPE	upregulated	-0.68046	0	0
hsa-miR-412-3p	NEUROD2	upregulated	-0.643342	1.6836e-304	9.00517e-304
hsa-miR-412-3p	NFATC4	upregulated	-0.755059	0	0
hsa-miR-412-3p	PRRX1	upregulated	-0.555207	8.28613e-211	3.12201e-210
hsa-miR-412-3p	SAMD5	upregulated	-0.89389	0	0
hsa-miR-412-3p	SLC16A12	upregulated	-0.648353	0	0
hsa-miR-412-3p	SLC22A2	upregulated	-0.564622	1.70893e-219	6.62969e-219
hsa-miR-412-3p	SLC9A2	upregulated	-0.578002	2.49603e-232	1.02077e-231
hsa-miR-412-3p	SPRY4	upregulated	-0.802188	0	0
hsa-miR-412-3p	SRARP	upregulated	-0.898655	0	0
hsa-miR-412-3p	SYT7	upregulated	-0.906276	0	0
hsa-miR-412-3p	TEX19	upregulated	-0.815609	0	0
hsa-miR-412-3p	TMEM207	upregulated	-0.762873	0	0
hsa-miR-412-3p	TTLL10	upregulated	-0.906659	0	0
hsa-miR-412-3p	XKR4	upregulated	-0.901827	0	0
hsa-miR-412-3p	ZFHX4	upregulated	-0.676164	0	0
hsa-miR-412-3p	ZIC4	upregulated	-0.667336	0	0
hsa-miR-412-3p	ZNF750	upregulated	-0.770376	0	0
hsa-miR-424-5p	AHNAK2	downregulated	-0.511546	5.9026e-174	2.00811e-173
hsa-miR-424-5p	CACNA2D1	downregulated	-0.706299	0	0
hsa-miR-424-5p	CASKIN1	downregulated	-0.761631	0	0
hsa-miR-424-5p	CCDC80	downregulated	-0.806337	0	0
hsa-miR-424-5p	EPB41L4B	downregulated	-0.722451	0	0
hsa-miR-424-5p	EPHA7	downregulated	-0.735671	0	0
hsa-miR-424-5p	EXOC3L2	downregulated	-0.806658	0	0
hsa-miR-424-5p	FBXO17	downregulated	-0.542357	2.15115e-199	7.86351e-199
hsa-miR-424-5p	FOXP2	downregulated	-0.804213	0	0
hsa-miR-424-5p	HCN1	downregulated	-0.501472	3.43218e-166	1.13424e-165
hsa-miR-424-5p	ISM2	downregulated	-0.551597	1.49639e-207	5.60577e-207
hsa-miR-424-5p	OTOGL	downregulated	-0.745495	0	0
hsa-miR-424-5p	PCDHA4	downregulated	-0.791168	0	0
hsa-miR-424-5p	PCDHA5	downregulated	-0.65434	0	0
hsa-miR-424-5p	RSPO3	downregulated	-0.745232	0	0
hsa-miR-424-5p	RUNX1T1	downregulated	-0.830616	0	0
hsa-miR-424-5p	SCN1A	downregulated	-0.716456	0	0
hsa-miR-424-5p	SYDE1	downregulated	-0.803447	0	0
hsa-miR-424-5p	SYT4	downregulated	-0.556896	2.40428e-212	9.11119e-212
hsa-miR-424-5p	ZFHX4	downregulated	-0.637169	6.29914e-297	3.27122e-296
hsa-miR-450b-5p	ADAMTS8	downregulated	-0.535093	3.70234e-193	1.3214e-192
hsa-miR-450b-5p	ADGRL3	downregulated	-0.773784	0	0
hsa-miR-450b-5p	ADH1B	downregulated	-0.754982	0	0
hsa-miR-450b-5p	ANO3	downregulated	-0.699587	0	0
hsa-miR-450b-5p	ANTXR1	downregulated	-0.829454	0	0
hsa-miR-450b-5p	ATP6V0D2	downregulated	-0.718189	0	0
hsa-miR-450b-5p	BBOX1	downregulated	-0.725808	0	0
hsa-miR-450b-5p	CDH10	downregulated	-0.676496	0	0
hsa-miR-450b-5p	CFHR3	downregulated	-0.591634	4.94696e-246	2.10648e-245
hsa-miR-450b-5p	CFHR4	downregulated	-0.68583	0	0
hsa-miR-450b-5p	CHRM2	downregulated	-0.73123	0	0
hsa-miR-450b-5p	CHRNA3	downregulated	-0.623222	1.93889e-280	9.49138e-280
hsa-miR-450b-5p	CNTN3	downregulated	-0.602742	1.08171e-257	4.8259e-257
hsa-miR-450b-5p	CNTN4	downregulated	-0.718835	0	0
hsa-miR-450b-5p	CNTN6	downregulated	-0.899522	0	0
hsa-miR-450b-5p	COLEC10	downregulated	-0.685439	0	0
hsa-miR-450b-5p	CRISP1	downregulated	-0.719609	0	0
hsa-miR-450b-5p	CSRNP3	downregulated	-0.699538	0	0
hsa-miR-450b-5p	DCC	downregulated	-0.889993	0	0
hsa-miR-450b-5p	DGKB	downregulated	-0.676499	0	0
hsa-miR-450b-5p	DIO2	downregulated	-0.682039	0	0
hsa-miR-450b-5p	DYDC2	downregulated	-0.633674	1.02563e-292	5.25667e-292
hsa-miR-450b-5p	ERBB3	downregulated	-0.829423	0	0
hsa-miR-450b-5p	ERBB4	downregulated	-0.875078	0	0
hsa-miR-450b-5p	FOXA1	downregulated	-0.667952	0	0
hsa-miR-450b-5p	FOXP2	downregulated	-0.937363	0	0
hsa-miR-450b-5p	FSTL5	downregulated	-0.891953	0	0
hsa-miR-450b-5p	GABRA1	downregulated	-0.699062	0	0
hsa-miR-450b-5p	GABRA4	downregulated	-0.634623	7.46801e-294	3.85781e-293
hsa-miR-450b-5p	GABRG1	downregulated	-0.7179	0	0
hsa-miR-450b-5p	GABRG3	downregulated	-0.560496	1.1853e-215	4.54442e-215
hsa-miR-450b-5p	GLIS2	downregulated	-0.871818	0	0
hsa-miR-450b-5p	GOLGA6C	downregulated	-0.68778	0	0
hsa-miR-450b-5p	GPR158	downregulated	-0.625619	3.25695e-283	1.60638e-282
hsa-miR-450b-5p	GPR4	downregulated	-0.716776	0	0
hsa-miR-450b-5p	GRIA2	downregulated	-0.723562	0	0
hsa-miR-450b-5p	HAS1	downregulated	-0.634059	3.54815e-293	1.82809e-292
hsa-miR-450b-5p	HCN1	downregulated	-0.746421	0	0
hsa-miR-450b-5p	HOXC10	downregulated	-0.689495	0	0
hsa-miR-450b-5p	IL22RA2	downregulated	-0.649333	0	0
hsa-miR-450b-5p	IL3	downregulated	-0.735966	0	0
hsa-miR-450b-5p	ISL1	downregulated	-0.658312	0	0
hsa-miR-450b-5p	KCNB1	downregulated	-0.87182	0	0
hsa-miR-450b-5p	KCNJ6	downregulated	-0.856566	0	0
hsa-miR-450b-5p	KLK10	downregulated	-0.688247	0	0
hsa-miR-450b-5p	LRIG3	downregulated	-0.743013	0	0
hsa-miR-450b-5p	LRRTM3	downregulated	-0.717312	0	0
hsa-miR-450b-5p	MDGA2	downregulated	-0.897058	0	0
hsa-miR-450b-5p	MOG	downregulated	-0.754895	0	0
hsa-miR-450b-5p	MYOZ2	downregulated	-0.745883	0	0
hsa-miR-450b-5p	NPY1R	downregulated	-0.754675	0	0
hsa-miR-450b-5p	NTS	downregulated	-0.621294	3.1693e-278	1.54376e-277
hsa-miR-450b-5p	OTOGL	downregulated	-0.89223	0	0
hsa-miR-450b-5p	PALMD	downregulated	-0.87442	0	0
hsa-miR-450b-5p	PCDH7	downregulated	-0.689503	0	0
hsa-miR-450b-5p	PCLO	downregulated	-0.882314	0	0
hsa-miR-450b-5p	PDE10A	downregulated	-0.887548	0	0
hsa-miR-450b-5p	POTED	downregulated	-0.588702	4.97518e-243	2.08681e-242
hsa-miR-450b-5p	PPM1E	downregulated	-0.638999	3.73754e-299	1.95127e-298
hsa-miR-450b-5p	PTPRZ1	downregulated	-0.830866	0	0
hsa-miR-450b-5p	PWWP3B	downregulated	-0.594759	2.88589e-249	1.25055e-248
hsa-miR-450b-5p	RAET1E	downregulated	-0.625865	1.68978e-283	8.37636e-283
hsa-miR-450b-5p	RGS4	downregulated	-0.70624	0	0
hsa-miR-450b-5p	RSPO3	downregulated	-0.893341	0	0
hsa-miR-450b-5p	SALL3	downregulated	-0.727304	0	0
hsa-miR-450b-5p	SLC12A5	downregulated	-0.7433	0	0
hsa-miR-450b-5p	SLC16A12	downregulated	-0.698185	0	0
hsa-miR-450b-5p	SLC17A6	downregulated	-0.783672	0	0
hsa-miR-450b-5p	SLC28A2	downregulated	-0.744467	0	0
hsa-miR-450b-5p	SLC5A12	downregulated	-0.658845	0	0
hsa-miR-450b-5p	SLC6A15	downregulated	-0.680967	0	0
hsa-miR-450b-5p	SLC7A14	downregulated	-0.703811	0	0
hsa-miR-450b-5p	SLC7A2	downregulated	-0.541175	2.28021e-198	8.289e-198
hsa-miR-450b-5p	SLITRK2	downregulated	-0.61967	2.25623e-276	1.09088e-275
hsa-miR-450b-5p	SLITRK6	downregulated	-0.617788	3.07277e-274	1.4784e-273
hsa-miR-450b-5p	SOX2	downregulated	-0.826521	0	0
hsa-miR-450b-5p	SOX21	downregulated	-0.681572	0	0
hsa-miR-450b-5p	SPARCL1	downregulated	-0.729314	0	0
hsa-miR-450b-5p	SPTBN4	downregulated	-0.684941	0	0
hsa-miR-450b-5p	SYNPR	downregulated	-0.650176	0	0
hsa-miR-450b-5p	TEX15	downregulated	-0.814519	0	0
hsa-miR-450b-5p	THSD7B	downregulated	-0.561525	1.3205e-216	5.07267e-216
hsa-miR-450b-5p	TRDN	downregulated	-0.827051	0	0
hsa-miR-450b-5p	UNC5D	downregulated	-0.641649	2.09409e-302	1.108e-301
hsa-miR-450b-5p	VGLL3	downregulated	-0.68393	0	0
hsa-miR-450b-5p	XKR4	downregulated	-0.541439	1.34557e-198	4.90048e-198
hsa-miR-450b-5p	ZIC1	downregulated	-0.62127	3.38032e-278	1.64247e-277
hsa-miR-450b-5p	ZIC4	downregulated	-0.679931	0	0
hsa-miR-450b-5p	ZIC5	downregulated	-0.738058	0	0
hsa-miR-499a-5p	AMOTL2	downregulated	-0.749213	0	0
hsa-miR-499a-5p	ANTXR1	downregulated	-0.6058	5.53254e-261	2.50817e-260
hsa-miR-499a-5p	ASB5	downregulated	-0.592501	6.32299e-247	2.71598e-246
hsa-miR-499a-5p	C2orf72	downregulated	-0.587448	9.36003e-242	3.9093e-241
hsa-miR-499a-5p	CSRNP3	downregulated	-0.507153	1.54322e-170	5.18721e-170
hsa-miR-499a-5p	CYP27C1	downregulated	-0.636365	5.94082e-296	3.077e-295
hsa-miR-499a-5p	DCC	downregulated	-0.667604	0	0
hsa-miR-499a-5p	EIF4E1B	downregulated	-0.661319	0	0
hsa-miR-499a-5p	EPB41L4B	downregulated	-0.683491	0	0
hsa-miR-499a-5p	EPHA3	downregulated	-0.667908	0	0
hsa-miR-499a-5p	EPHA5	downregulated	-0.593552	5.16969e-248	2.23526e-247
hsa-miR-499a-5p	FOXP2	downregulated	-0.715672	0	0
hsa-miR-499a-5p	FUT9	downregulated	-0.515827	2.46261e-177	8.46603e-177
hsa-miR-499a-5p	GABRA1	downregulated	-0.506821	2.78862e-170	9.35736e-170
hsa-miR-499a-5p	GABRG2	downregulated	-0.795597	0	0
hsa-miR-499a-5p	GFRA1	downregulated	-0.530138	5.44866e-189	1.93763e-188
hsa-miR-499a-5p	HAND1	downregulated	-0.513483	1.76692e-175	6.0321e-175
hsa-miR-499a-5p	HOXC13	downregulated	-0.626501	3.06224e-284	1.52182e-283
hsa-miR-499a-5p	IGF2	downregulated	-0.664249	0	0
hsa-miR-499a-5p	JPH2	downregulated	-0.670078	0	0
hsa-miR-499a-5p	LRRC71	downregulated	-0.577925	2.9761e-232	1.21457e-231
hsa-miR-499a-5p	LRRTM1	downregulated	-0.75027	0	0
hsa-miR-499a-5p	MBL2	downregulated	-0.660267	0	0
hsa-miR-499a-5p	NOVA1	downregulated	-0.611279	5.68404e-267	2.6503e-266
hsa-miR-499a-5p	PCDH7	downregulated	-0.502524	5.45798e-167	1.81902e-166
hsa-miR-499a-5p	PCDHB11	downregulated	-0.508595	1.18137e-171	3.99143e-171
hsa-miR-499a-5p	PDE10A	downregulated	-0.663576	0	0
hsa-miR-499a-5p	PDE6A	downregulated	-0.502404	6.73144e-167	2.23963e-166
hsa-miR-499a-5p	POU4F2	downregulated	-0.65868	0	0
hsa-miR-499a-5p	PRKAA2	downregulated	-0.560248	2.00865e-215	7.68611e-215
hsa-miR-499a-5p	PRR18	downregulated	-0.714347	0	0
hsa-miR-499a-5p	PRRX1	downregulated	-0.539681	4.44731e-197	1.60775e-196
hsa-miR-499a-5p	PTPRZ1	downregulated	-0.608443	7.38841e-264	3.40457e-263
hsa-miR-499a-5p	RALYL	downregulated	-0.691687	0	0
hsa-miR-499a-5p	RGS21	downregulated	-0.511714	4.35436e-174	1.48396e-173
hsa-miR-499a-5p	RND3	downregulated	-0.664353	0	0
hsa-miR-499a-5p	SLC17A6	downregulated	-0.559244	1.69158e-214	6.43523e-214
hsa-miR-499a-5p	SLC35F1	downregulated	-0.689755	0	0
hsa-miR-499a-5p	VGLL2	downregulated	-0.602233	3.79052e-257	1.68344e-256
hsa-miR-520g-3p	ADGRL2	upregulated	-0.545783	2.17503e-202	8.05583e-202
hsa-miR-520g-3p	CCDC83	upregulated	-0.608187	1.40793e-263	6.4574e-263
hsa-miR-520g-3p	CNTN3	upregulated	-0.580314	1.31432e-234	5.40883e-234
hsa-miR-520g-3p	EN2	upregulated	-0.514775	1.68437e-176	5.77035e-176
hsa-miR-520g-3p	EPHA5	upregulated	-0.527164	1.6001e-186	5.67991e-186
hsa-miR-520g-3p	FLRT2	upregulated	-0.523731	1.05567e-183	3.72045e-183
hsa-miR-520g-3p	FOLR1	upregulated	-0.54968	7.74725e-206	2.89673e-205
hsa-miR-520g-3p	LHX8	upregulated	-0.562231	2.92179e-217	1.12681e-216
hsa-miR-520g-3p	NOX4	upregulated	-0.622289	2.29152e-279	1.11897e-278
hsa-miR-520g-3p	NPHS1	upregulated	-0.560168	2.38063e-215	9.09178e-215
hsa-miR-520g-3p	PCDHA10	upregulated	-0.569668	2.89728e-224	1.14664e-223
hsa-miR-520g-3p	PCDHA4	upregulated	-0.552	6.51384e-208	2.44955e-207
hsa-miR-520g-3p	PCDHA5	upregulated	-0.559402	1.20922e-214	4.60912e-214
hsa-miR-520g-3p	PCDHA6	upregulated	-0.646435	2.32329e-308	1.28468e-307
hsa-miR-520g-3p	PDE4C	upregulated	-0.699334	0	0
hsa-miR-520g-3p	POU3F2	upregulated	-0.657116	0	0
hsa-miR-520g-3p	POU4F2	upregulated	-0.516614	5.82114e-178	2.00824e-177
hsa-miR-520g-3p	RIMS1	upregulated	-0.514041	6.40951e-176	2.19196e-175
hsa-miR-520g-3p	SLC17A6	upregulated	-0.596465	4.77259e-251	2.0773e-250
hsa-miR-520g-3p	SLITRK2	upregulated	-0.525815	2.06875e-185	7.31704e-185
hsa-miR-520g-3p	SLITRK3	upregulated	-0.64407	2.09517e-305	1.13301e-304
hsa-miR-520g-3p	SPACA1	upregulated	-0.503364	1.24989e-167	4.17978e-167
hsa-miR-520g-3p	SPRY4	upregulated	-0.527076	1.89159e-186	6.70253e-186
hsa-miR-520g-3p	STAC2	upregulated	-0.51671	4.87354e-178	1.68429e-177
hsa-miR-520g-3p	SULF1	upregulated	-0.589461	8.35893e-244	3.51362e-243
hsa-miR-520g-3p	VGLL3	upregulated	-0.720178	0	0
hsa-miR-548ab	ABCA8	downregulated	-0.717554	0	0
hsa-miR-548ab	C18orf63	downregulated	-0.684853	0	0
hsa-miR-548ab	CCDC80	downregulated	-0.892178	0	0
hsa-miR-548ab	CELF3	downregulated	-0.625701	2.61763e-283	1.29431e-282
hsa-miR-548ab	CFHR3	downregulated	-0.657712	0	0
hsa-miR-548ab	CFHR4	downregulated	-0.722978	0	0
hsa-miR-548ab	CSRNP3	downregulated	-0.644248	1.25749e-305	6.85682e-305
hsa-miR-548ab	CTCFL	downregulated	-0.608326	9.93133e-264	4.56562e-263
hsa-miR-548ab	DGKB	downregulated	-0.629673	5.83667e-288	2.93779e-287
hsa-miR-548ab	DIO2	downregulated	-0.565361	3.46502e-220	1.34957e-219
hsa-miR-548ab	DPYSL5	downregulated	-0.580709	5.34349e-235	2.20363e-234
hsa-miR-548ab	DSC3	downregulated	-0.753048	0	0
hsa-miR-548ab	EPHA3	downregulated	-0.549457	1.22258e-205	4.55393e-205
hsa-miR-548ab	EPHA5	downregulated	-0.580138	1.96259e-234	8.05975e-234
hsa-miR-548ab	FOXA1	downregulated	-0.601036	7.15304e-256	3.16962e-255
hsa-miR-548ab	GABRA4	downregulated	-0.570832	2.23761e-225	8.90961e-225
hsa-miR-548ab	GFRA1	downregulated	-0.674027	0	0
hsa-miR-548ab	GJD3	downregulated	-0.808844	0	0
hsa-miR-548ab	GLRB	downregulated	-0.582865	3.83329e-237	1.5875e-236
hsa-miR-548ab	GOLGA6C	downregulated	-0.590044	2.12055e-244	8.9519e-244
hsa-miR-548ab	GOLGA6D	downregulated	-0.726821	0	0
hsa-miR-548ab	GPR12	downregulated	-0.6541	0	0
hsa-miR-548ab	GRID2	downregulated	-0.794646	0	0
hsa-miR-548ab	GRM5	downregulated	-0.603271	2.93086e-258	1.31054e-257
hsa-miR-548ab	HCN1	downregulated	-0.721247	0	0
hsa-miR-548ab	HNF4G	downregulated	-0.823357	0	0
hsa-miR-548ab	IL33	downregulated	-0.615062	3.55915e-271	1.6999e-270
hsa-miR-548ab	KIRREL2	downregulated	-0.546846	2.51851e-203	9.36334e-203
hsa-miR-548ab	LHFPL5	downregulated	-0.831357	0	0
hsa-miR-548ab	LRRC4B	downregulated	-0.691652	0	0
hsa-miR-548ab	LRRTM3	downregulated	-0.671256	0	0
hsa-miR-548ab	MDGA2	downregulated	-0.837135	0	0
hsa-miR-548ab	NOL4	downregulated	-0.720379	0	0
hsa-miR-548ab	NOTUM	downregulated	-0.633337	2.59837e-292	1.32828e-291
hsa-miR-548ab	NOVA1	downregulated	-0.779283	0	0
hsa-miR-548ab	PCDH11Y	downregulated	-0.521689	4.83666e-182	1.69846e-181
hsa-miR-548ab	PCLO	downregulated	-0.852842	0	0
hsa-miR-548ab	PRKAA2	downregulated	-0.716294	0	0
hsa-miR-548ab	PRR15L	downregulated	-0.52306	3.71734e-183	1.30773e-182
hsa-miR-548ab	RNF128	downregulated	-0.796509	0	0
hsa-miR-548ab	RUNX1T1	downregulated	-0.904865	0	0
hsa-miR-548ab	SLC30A8	downregulated	-0.845376	0	0
hsa-miR-548ab	SLC6A15	downregulated	-0.562329	2.36788e-217	9.14988e-217
hsa-miR-548ab	SPDYE1	downregulated	-0.576668	5.05999e-231	2.05222e-230
hsa-miR-548ab	SPDYE5	downregulated	-0.718064	0	0
hsa-miR-548ab	SYT10	downregulated	-0.605446	1.33582e-260	6.04197e-260
hsa-miR-548ab	UGT2B7	downregulated	-0.549555	1.001e-205	3.73568e-205
hsa-miR-548ab	UNC5D	downregulated	-0.573292	9.62009e-228	3.86181e-227
hsa-miR-548ab	UNC80	downregulated	-0.567001	9.85292e-222	3.85284e-221
hsa-miR-548ab	VGLL3	downregulated	-0.574336	9.40073e-229	3.79704e-228
hsa-miR-548ab	ZIC1	downregulated	-0.545947	1.56229e-202	5.79731e-202
hsa-miR-548ak	CCDC80	downregulated	-0.563749	1.12156e-218	4.34247e-218
hsa-miR-548ak	CELF3	downregulated	-0.597422	4.73651e-252	2.08004e-251
hsa-miR-548ak	CFHR4	downregulated	-0.568235	6.68385e-223	2.63462e-222
hsa-miR-548ak	DSC3	downregulated	-0.691487	0	0
hsa-miR-548ak	GOLGA6D	downregulated	-0.608461	7.06296e-264	3.26226e-263
hsa-miR-548ak	GULP1	downregulated	-0.81809	0	0
hsa-miR-548ak	HCN1	downregulated	-0.603915	5.95844e-259	2.67042e-258
hsa-miR-548ak	NOL4	downregulated	-0.60609	2.68548e-261	1.22311e-260
hsa-miR-548ak	NOVA1	downregulated	-0.6402	1.26737e-300	6.66983e-300
hsa-miR-548ak	PCLO	downregulated	-0.659025	0	0
hsa-miR-548ak	PRKAA2	downregulated	-0.603927	5.79501e-259	2.60311e-258
hsa-miR-548ak	RUNX1T1	downregulated	-0.569857	1.91087e-224	7.57785e-224
hsa-miR-548ak	SLC30A8	downregulated	-0.57033	6.75008e-225	2.68227e-224
hsa-miR-548ar-5p	GULP1	downregulated	-0.891633	0	0
hsa-miR-548ar-5p	PCLO	downregulated	-0.51611	1.46652e-177	5.05047e-177
hsa-miR-548au-5p	ABCA8	downregulated	-0.765808	0	0
hsa-miR-548au-5p	C18orf63	downregulated	-0.762293	0	0
hsa-miR-548au-5p	CCDC80	downregulated	-0.850412	0	0
hsa-miR-548au-5p	CELF3	downregulated	-0.779146	0	0
hsa-miR-548au-5p	CHST9	downregulated	-0.613202	4.21532e-269	1.9939e-268
hsa-miR-548au-5p	CSRNP3	downregulated	-0.676232	0	0
hsa-miR-548au-5p	CTCFL	downregulated	-0.62471	3.6987e-282	1.81969e-281
hsa-miR-548au-5p	DGKB	downregulated	-0.704978	0	0
hsa-miR-548au-5p	FOXA1	downregulated	-0.648463	0	0
hsa-miR-548au-5p	GABRA4	downregulated	-0.60419	3.01632e-259	1.35804e-258
hsa-miR-548au-5p	GJD3	downregulated	-0.734294	0	0
hsa-miR-548au-5p	GPR12	downregulated	-0.686434	0	0
hsa-miR-548au-5p	GRM5	downregulated	-0.641962	8.59113e-303	4.55794e-302
hsa-miR-548au-5p	GULP1	downregulated	-0.53907	1.4915e-196	5.38203e-196
hsa-miR-548au-5p	HCN1	downregulated	-0.820397	0	0
hsa-miR-548au-5p	HNF4G	downregulated	-0.762725	0	0
hsa-miR-548au-5p	LRRC4B	downregulated	-0.760764	0	0
hsa-miR-548au-5p	LRRTM3	downregulated	-0.715114	0	0
hsa-miR-548au-5p	NOL4	downregulated	-0.820724	0	0
hsa-miR-548au-5p	NOTUM	downregulated	-0.69268	0	0
hsa-miR-548au-5p	NOVA1	downregulated	-0.858737	0	0
hsa-miR-548au-5p	PCDH11Y	downregulated	-0.518739	1.16023e-179	4.02392e-179
hsa-miR-548au-5p	PCLO	downregulated	-0.886588	0	0
hsa-miR-548au-5p	PRKAA2	downregulated	-0.821142	0	0
hsa-miR-548au-5p	RNF128	downregulated	-0.724528	0	0
hsa-miR-548au-5p	SPDYE1	downregulated	-0.611347	4.77925e-267	2.23373e-266
hsa-miR-548au-5p	ZIC1	downregulated	-0.551959	7.088e-208	2.66037e-207
hsa-miR-548ay-5p	ABCA8	downregulated	-0.752938	0	0
hsa-miR-548ay-5p	CACNG2	downregulated	-0.736511	0	0
hsa-miR-548ay-5p	CCDC80	downregulated	-0.843129	0	0
hsa-miR-548ay-5p	CSRNP3	downregulated	-0.668883	0	0
hsa-miR-548ay-5p	CTCFL	downregulated	-0.613292	3.35531e-269	1.59094e-268
hsa-miR-548ay-5p	GABRA4	downregulated	-0.593358	8.21486e-248	3.54413e-247
hsa-miR-548ay-5p	GMNC	downregulated	-0.732426	0	0
hsa-miR-548ay-5p	GRM5	downregulated	-0.633055	5.64533e-292	2.87839e-291
hsa-miR-548ay-5p	GULP1	downregulated	-0.543498	2.18141e-200	8.03399e-200
hsa-miR-548ay-5p	HCN1	downregulated	-0.814145	0	0
hsa-miR-548ay-5p	HNF4G	downregulated	-0.755729	0	0
hsa-miR-548ay-5p	LRRTM3	downregulated	-0.704102	0	0
hsa-miR-548ay-5p	NOL4	downregulated	-0.813119	0	0
hsa-miR-548ay-5p	NOVA1	downregulated	-0.848293	0	0
hsa-miR-548ay-5p	PCDH11Y	downregulated	-0.508153	2.60167e-171	8.77504e-171
hsa-miR-548ay-5p	PRKAA2	downregulated	-0.81438	0	0
hsa-miR-548ay-5p	RNF128	downregulated	-0.713475	0	0
hsa-miR-548ay-5p	SCN1A	downregulated	-0.877579	0	0
hsa-miR-548ay-5p	SPDYE1	downregulated	-0.598613	2.64006e-253	1.16459e-252
hsa-miR-548ay-5p	SYT10	downregulated	-0.627854	8.02318e-286	4.00751e-285
hsa-miR-548az-5p	ABCA8	downregulated	-0.718793	0	0
hsa-miR-548az-5p	AMER2	downregulated	-0.694761	0	0
hsa-miR-548az-5p	CSMD3	downregulated	-0.66814	0	0
hsa-miR-548az-5p	CSRNP3	downregulated	-0.648751	0	0
hsa-miR-548az-5p	EFNA2	downregulated	-0.641056	1.12684e-301	5.94619e-301
hsa-miR-548az-5p	EPHA5	downregulated	-0.585901	3.44525e-240	1.43284e-239
hsa-miR-548az-5p	ERBB4	downregulated	-0.924888	0	0
hsa-miR-548az-5p	FGF23	downregulated	-0.535218	2.90212e-193	1.03768e-192
hsa-miR-548az-5p	FOXL2	downregulated	-0.615891	4.19074e-272	2.00645e-271
hsa-miR-548az-5p	GABRA4	downregulated	-0.573789	3.18422e-228	1.2835e-227
hsa-miR-548az-5p	GOLGA6C	downregulated	-0.596633	3.18253e-251	1.38829e-250
hsa-miR-548az-5p	GRM5	downregulated	-0.608817	2.88005e-264	1.3397e-263
hsa-miR-548az-5p	HCN1	downregulated	-0.723509	0	0
hsa-miR-548az-5p	HNF4G	downregulated	-0.825281	0	0
hsa-miR-548az-5p	MDGA2	downregulated	-0.841496	0	0
hsa-miR-548az-5p	MYOCD	downregulated	-0.699174	0	0
hsa-miR-548az-5p	OTOGL	downregulated	-0.836591	0	0
hsa-miR-548az-5p	PCDHA1	downregulated	-0.657389	0	0
hsa-miR-548az-5p	PCDHA2	downregulated	-0.595408	6.08237e-250	2.64153e-249
hsa-miR-548az-5p	PCDHA4	downregulated	-0.856446	0	0
hsa-miR-548az-5p	PCDHA5	downregulated	-0.740741	0	0
hsa-miR-548az-5p	PCDHA9	downregulated	-0.639224	1.98539e-299	1.03928e-298
hsa-miR-548az-5p	PCDHAC2	downregulated	-0.657266	0	0
hsa-miR-548az-5p	PLCXD3	downregulated	-0.621262	3.44571e-278	1.67011e-277
hsa-miR-548az-5p	PPM1E	downregulated	-0.613619	1.45105e-269	6.8969e-269
hsa-miR-548az-5p	PPP3R2	downregulated	-0.679337	0	0
hsa-miR-548az-5p	PRKAA2	downregulated	-0.718747	0	0
hsa-miR-548az-5p	ROBO2	downregulated	-0.576731	4.39053e-231	1.78439e-230
hsa-miR-548az-5p	SALL3	downregulated	-0.740143	0	0
hsa-miR-548az-5p	SCN1A	downregulated	-0.858462	0	0
hsa-miR-548az-5p	SGCZ	downregulated	-0.654074	0	0
hsa-miR-548az-5p	SLC12A5	downregulated	-0.72233	0	0
hsa-miR-548az-5p	SLC35F1	downregulated	-0.866972	0	0
hsa-miR-548az-5p	SOWAHA	downregulated	-0.573301	9.43986e-228	3.79722e-227
hsa-miR-548az-5p	SYT10	downregulated	-0.611975	9.68951e-268	4.5395e-267
hsa-miR-548az-5p	TOX3	downregulated	-0.64365	6.98713e-305	3.75774e-304
hsa-miR-548az-5p	TUSC3	downregulated	-0.542952	6.52511e-200	2.39865e-199
hsa-miR-548az-5p	VGLL3	downregulated	-0.575956	2.50535e-230	1.01402e-229
hsa-miR-548az-5p	ZFHX4	downregulated	-0.728651	0	0
hsa-miR-548bb-3p	GAL3ST3	downregulated	-0.562022	4.56754e-217	1.75806e-216
hsa-miR-548d-5p	ABCA8	downregulated	-0.755946	0	0
hsa-miR-548d-5p	CABCOCO1	downregulated	-0.660416	0	0
hsa-miR-548d-5p	CCDC80	downregulated	-0.84411	0	0
hsa-miR-548d-5p	CELF3	downregulated	-0.7755	0	0
hsa-miR-548d-5p	CFHR3	downregulated	-0.713569	0	0
hsa-miR-548d-5p	CFHR4	downregulated	-0.787746	0	0
hsa-miR-548d-5p	CSRNP3	downregulated	-0.666617	0	0
hsa-miR-548d-5p	CTCFL	downregulated	-0.612392	3.34459e-268	1.57823e-267
hsa-miR-548d-5p	DPYSL5	downregulated	-0.579843	3.84127e-234	1.5742e-233
hsa-miR-548d-5p	DSC3	downregulated	-0.852903	0	0
hsa-miR-548d-5p	EPHA5	downregulated	-0.616369	1.21799e-272	5.84577e-272
hsa-miR-548d-5p	FOXA1	downregulated	-0.637225	5.39467e-297	2.80895e-296
hsa-miR-548d-5p	GABRA4	downregulated	-0.592218	1.23642e-246	5.29934e-246
hsa-miR-548d-5p	GFRA1	downregulated	-0.729111	0	0
hsa-miR-548d-5p	GJD3	downregulated	-0.724986	0	0
hsa-miR-548d-5p	GLRB	downregulated	-0.591555	5.96977e-246	2.5365e-245
hsa-miR-548d-5p	GOLGA6D	downregulated	-0.816128	0	0
hsa-miR-548d-5p	GRM5	downregulated	-0.631804	1.74852e-290	8.84626e-290
hsa-miR-548d-5p	GULP1	downregulated	-0.540336	1.2108e-197	4.38522e-197
hsa-miR-548d-5p	HCN1	downregulated	-0.815121	0	0
hsa-miR-548d-5p	HNF4G	downregulated	-0.757245	0	0
hsa-miR-548d-5p	IL33	downregulated	-0.664258	0	0
hsa-miR-548d-5p	KIRREL2	downregulated	-0.572791	2.92881e-227	1.17332e-226
hsa-miR-548d-5p	LHFPL5	downregulated	-0.750751	0	0
hsa-miR-548d-5p	LRRC4B	downregulated	-0.752641	0	0
hsa-miR-548d-5p	LRRTM3	downregulated	-0.705176	0	0
hsa-miR-548d-5p	MDGA2	downregulated	-0.770085	0	0
hsa-miR-548d-5p	NOL4	downregulated	-0.814893	0	0
hsa-miR-548d-5p	NOTUM	downregulated	-0.68393	0	0
hsa-miR-548d-5p	NOVA1	downregulated	-0.849752	0	0
hsa-miR-548d-5p	PCDH11Y	downregulated	-0.508713	9.57195e-172	3.23961e-171
hsa-miR-548d-5p	PCLO	downregulated	-0.880516	0	0
hsa-miR-548d-5p	PRKAA2	downregulated	-0.813958	0	0
hsa-miR-548d-5p	RNF128	downregulated	-0.716226	0	0
hsa-miR-548d-5p	RUNX1T1	downregulated	-0.848001	0	0
hsa-miR-548d-5p	SCN1A	downregulated	-0.878528	0	0
hsa-miR-548d-5p	SLC30A8	downregulated	-0.731712	0	0
hsa-miR-548d-5p	SPACA1	downregulated	-0.589889	3.055e-244	1.2869e-243
hsa-miR-548d-5p	SPDYE1	downregulated	-0.597412	4.85425e-252	2.12698e-251
hsa-miR-548d-5p	SPDYE5	downregulated	-0.612041	8.17587e-268	3.83953e-267
hsa-miR-548d-5p	UGT2B7	downregulated	-0.542605	1.30964e-199	4.7963e-199
hsa-miR-548d-5p	UNC5D	downregulated	-0.57767	5.28527e-232	2.15249e-231
hsa-miR-548d-5p	ZIC1	downregulated	-0.542637	1.2266e-199	4.50059e-199
hsa-miR-624-5p	ADAM2	downregulated	-0.51046	4.17467e-173	1.4178e-172
hsa-miR-624-5p	BCAN	downregulated	-0.586509	8.36387e-241	3.48583e-240
hsa-miR-624-5p	C14orf39	downregulated	-0.501484	3.35926e-166	1.11201e-165
hsa-miR-624-5p	C20orf173	downregulated	-0.519177	5.16568e-180	1.79473e-179
hsa-miR-624-5p	CSMD3	downregulated	-0.538323	6.52557e-196	2.3504e-195
hsa-miR-624-5p	EPHA3	downregulated	-0.67812	0	0
hsa-miR-624-5p	ERBB4	downregulated	-0.860055	0	0
hsa-miR-624-5p	FANCD2OS	downregulated	-0.632663	1.6579e-291	8.43124e-291
hsa-miR-624-5p	FIBIN	downregulated	-0.501526	3.12524e-166	1.03629e-165
hsa-miR-624-5p	GFRA1	downregulated	-0.544637	2.20383e-201	8.1471e-201
hsa-miR-624-5p	GJD3	downregulated	-0.67483	0	0
hsa-miR-624-5p	IBSP	downregulated	-0.613661	1.30437e-269	6.21474e-269
hsa-miR-624-5p	NOL4	downregulated	-0.572577	4.70825e-227	1.88234e-226
hsa-miR-624-5p	OR9Q1	downregulated	-0.733471	0	0
hsa-miR-624-5p	PDE10A	downregulated	-0.67881	0	0
hsa-miR-624-5p	S100A11P1	downregulated	-0.648791	0	0
hsa-miR-624-5p	SLC25A18	downregulated	-0.532396	7.01117e-191	2.49781e-190
hsa-miR-624-5p	SYPL2	downregulated	-0.701393	0	0
hsa-miR-96-5p	ADGRL2	downregulated	-0.591728	3.96015e-246	1.68995e-245
hsa-miR-96-5p	ADRA2C	downregulated	-0.890754	0	0
hsa-miR-96-5p	AMOTL2	downregulated	-0.934618	0	0
hsa-miR-96-5p	C2orf72	downregulated	-0.837937	0	0
hsa-miR-96-5p	CACNA1G	downregulated	-0.71486	0	0
hsa-miR-96-5p	CACNA2D1	downregulated	-0.886811	0	0
hsa-miR-96-5p	CDK5R2	downregulated	-0.736186	0	0
hsa-miR-96-5p	CLVS2	downregulated	-0.583168	1.91011e-237	7.92716e-237
hsa-miR-96-5p	CPE	downregulated	-0.883886	0	0
hsa-miR-96-5p	CSRNP3	downregulated	-0.678983	0	0
hsa-miR-96-5p	EPB41L4B	downregulated	-0.887131	0	0
hsa-miR-96-5p	ERBB4	downregulated	-0.943533	0	0
hsa-miR-96-5p	FOXP2	downregulated	-0.850444	0	0
hsa-miR-96-5p	FUT9	downregulated	-0.723619	0	0
hsa-miR-96-5p	GAD2	downregulated	-0.660986	0	0
hsa-miR-96-5p	GJD3	downregulated	-0.737819	0	0
hsa-miR-96-5p	GRID2	downregulated	-0.724663	0	0
hsa-miR-96-5p	GRM1	downregulated	-0.764964	0	0
hsa-miR-96-5p	GRM5	downregulated	-0.645647	2.25825e-307	1.24521e-306
hsa-miR-96-5p	IGF2BP1	downregulated	-0.762536	0	0
hsa-miR-96-5p	ISL1	downregulated	-0.598215	6.94303e-253	3.05587e-252
hsa-miR-96-5p	LHX1	downregulated	-0.838584	0	0
hsa-miR-96-5p	NOVA1	downregulated	-0.86057	0	0
hsa-miR-96-5p	NOVA2	downregulated	-0.688017	0	0
hsa-miR-96-5p	OR51E2	downregulated	-0.719451	0	0
hsa-miR-96-5p	PCDH11Y	downregulated	-0.521047	1.60195e-181	5.59541e-181
hsa-miR-96-5p	PCLO	downregulated	-0.889364	0	0
hsa-miR-96-5p	PHYHIPL	downregulated	-0.775128	0	0
hsa-miR-96-5p	PRRX1	downregulated	-0.765609	0	0
hsa-miR-96-5p	RIMS4	downregulated	-0.642516	1.77592e-303	9.47319e-303
hsa-miR-96-5p	RND3	downregulated	-0.877663	0	0
hsa-miR-96-5p	RNF183	downregulated	-0.756169	0	0
hsa-miR-96-5p	SCN1A	downregulated	-0.885289	0	0
hsa-miR-96-5p	SLC12A5	downregulated	-0.82366	0	0
hsa-miR-96-5p	SLC9A2	downregulated	-0.747101	0	0
hsa-miR-96-5p	TAC1	downregulated	-0.626867	1.14738e-284	5.71651e-284
hsa-miR-96-5p	TBR1	downregulated	-0.75603	0	0
hsa-miR-96-5p	TLL1	downregulated	-0.781184	0	0
hsa-miR-96-5p	TMEM145	downregulated	-0.753755	0	0
hsa-miR-96-5p	TOX3	downregulated	-0.6899	0	0
hsa-miR-96-5p	UNC5D	downregulated	-0.588069	2.19421e-242	9.18388e-242
hsa-miR-96-5p	ZFHX4	downregulated	-0.631956	1.15297e-290	5.84826e-290
